# Supplementary material for: Global, regional, and national estimates and trends in stillbirths from 2000 to 2019: a systematic assessment
Source: PubMed Central journal article supplement (PMC8417352; doi:10.1016/s0140-6736(21)01112-0), 2021-08-28
Supplement: mmc1.pdf [file mmc1.pdf]

# THE LANCET

## Supplementary appendix

This appendix formed part of the original submission and has been peer reviewed. We post it as supplied by the authors.

Supplement to: Hug L, You D, Blencowe H, et al. Global, regional, and national estimates and trends in stillbirths from 2000 to 2019: a systematic assessment. *Lancet* 2021; **398**: 772–85.

## Web appendix

Title: Global, regional, and national levels and trends in stillbirths from 2000 to 2019: a systematic assessment.

Authors: Lucia Hug, Danzhen You, Hannah Blencowe, Anu Mishra, Zhengfan Wang, Miranda Fix, Jon Wakefield, Allisyn Moran, Victor Gaigbe-Togbe, Emi Suzuki, Dianna M. Blau, Simon Cousens, Andreea Creanga, Trevor Croft, Kenneth Hill, K. S. Joseph, Salome Maswime, Elizabeth McClure, Robert Pattinson, Jon Pedersen, Lucy K. Smith, Jennifer Zeitlin and Leontine Alkema on behalf of the United Nations Inter-agency Group for Child Mortality Estimation and its Core Stillbirth Estimation Group.

### Contents

|                                                                                                                                                                                                                                                             |    |
|-------------------------------------------------------------------------------------------------------------------------------------------------------------------------------------------------------------------------------------------------------------|----|
| 1. Abbreviations .....                                                                                                                                                                                                                                      | 2  |
| 2. Methods .....                                                                                                                                                                                                                                            | 3  |
| 2.1. Overview .....                                                                                                                                                                                                                                         | 3  |
| 2.3 Assumptions for definitional adjustment of stillbirth data.....                                                                                                                                                                                         | 6  |
| 2.4 Stillbirth estimation model .....                                                                                                                                                                                                                       | 6  |
| 2.5 Calculation of stillbirths .....                                                                                                                                                                                                                        | 6  |
| 3. Regional classification .....                                                                                                                                                                                                                            | 7  |
| 4. Supplementary Tables and Figures Table A1: Data availability by region and inclusion.....                                                                                                                                                                | 9  |
| Table A2: Data availability and inclusion by data source type.....                                                                                                                                                                                          | 9  |
| Table A3: Definitional adjustment factors .....                                                                                                                                                                                                             | 9  |
| Table A4: Source type biases estimates and assumptions .....                                                                                                                                                                                                | 9  |
| Table A5: Covariates used in stillbirth estimation model and corresponding estimated coefficients                                                                                                                                                           | 10 |
| Table A6: Rates and number of stillbirths, by country or territory .....                                                                                                                                                                                    | 10 |
| Table A7: Share of stillbirths, percentage decrease, annual rate of change in stillbirth rate, neonatal mortality rate and mortality rate among children aged 1–59 months, and ratio of stillbirth to neonatal mortality rate, by country or territory..... | 18 |
| Table A8: Series in SBR database by country or territory .....                                                                                                                                                                                              | 27 |
| Table A9: Data availability and inclusion by country and data source type .....                                                                                                                                                                             | 37 |
| Figure A4: Ratio of stillbirth rate and neonatal mortality rate and stillbirth rate in countries, 2019                                                                                                                                                      | 41 |
| Figure A5: Ratio of stillbirth rate and neonatal mortality rate and stillbirth rate in countries, 2000-2019 .....                                                                                                                                           | 42 |
| Figure A6: Stillbirth rate estimates with underlying data, by country or territory.....                                                                                                                                                                     | 43 |
| References .....                                                                                                                                                                                                                                            | 42 |

## 1. Abbreviations

|         |                                                                  |
|---------|------------------------------------------------------------------|
| DHS     | Demographic and Health Survey                                    |
| HMIS    | Health Management Information Systems                            |
| MICS    | Multiple Indicator Cluster Survey                                |
| NMR     | Neonatal Mortality Tate                                          |
| PH      | Pregnancy History                                                |
| RC      | Reproductive Calendar                                            |
| SBR     | Stillbirth Rate                                                  |
| UN IGME | United Nations Inter-agency Group for Child Mortality Estimation |
| VR      | Vital Registration                                               |

## 2. Methods

### 2.1. Overview

The UN IGME's approach to estimate stillbirth rates (SBR) includes the following steps:

1. Compile all available stillbirth data at a country level, derived from administrative sources, household surveys or population-based studies.
2. Evaluate data in accordance with the data quality criteria and produce adjustment or recalculation by applying standardized definitions.
3. Estimate global and country-specific trends of stillbirth rates using a smoothing time series model, supplemented with covariates associated with stillbirth rates. This process averages empirical data on stillbirths derived from the different sources for a given country. In the case of countries with sparse or no data, the identified covariates associated with stillbirth will inform the trend in stillbirth rate.

To increase the transparency of the estimation methodology and make stillbirth data available to users worldwide, UN IGME makes all data sources and stillbirth estimates available on its web portal at [www.childmortality.org](http://www.childmortality.org).

**Figure A1: Total stillbirth data and final data used in model by source type**

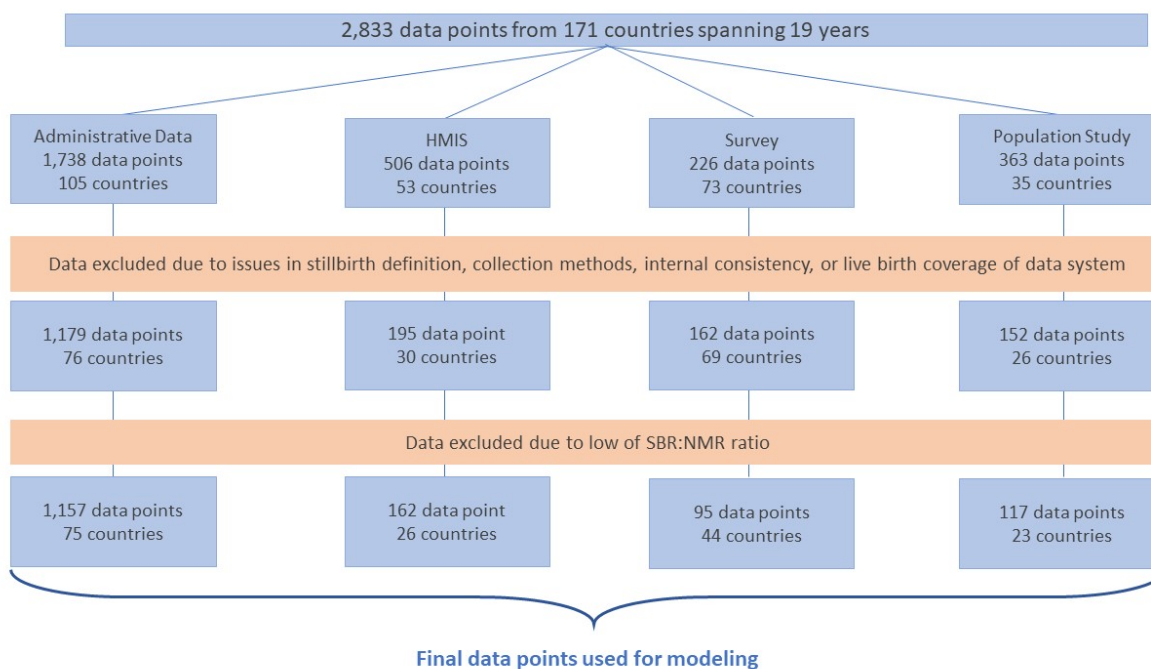

Estimates of stillbirth rates for a country are derived from various sources, such as administrative data (e.g. vital registration systems, birth or death registries, or health management information systems),

household surveys, or from population-based studies obtained from a review of academic literature. Additionally, data on factors associated with stillbirth rate are collected, to be used as covariates in the stillbirth estimation model. Table A5 lists the covariates used in the stillbirth estimation model and data sources.

**Figure A2: Data availability by source type and inclusion by region**

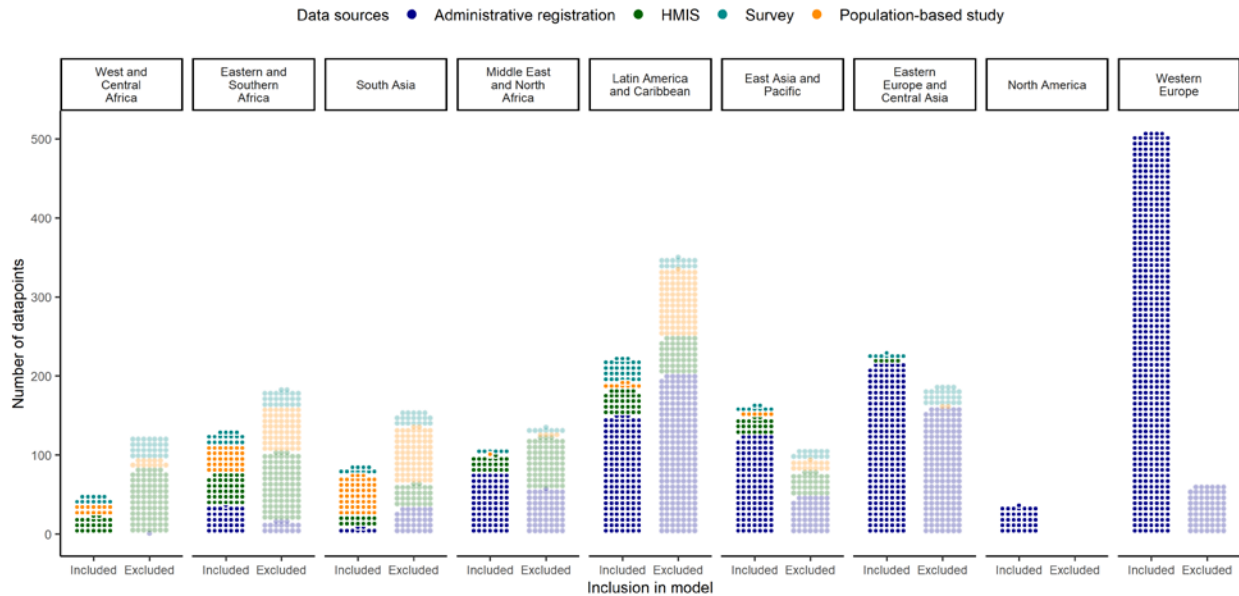

**Figure A3: Included data availability by source type and country**

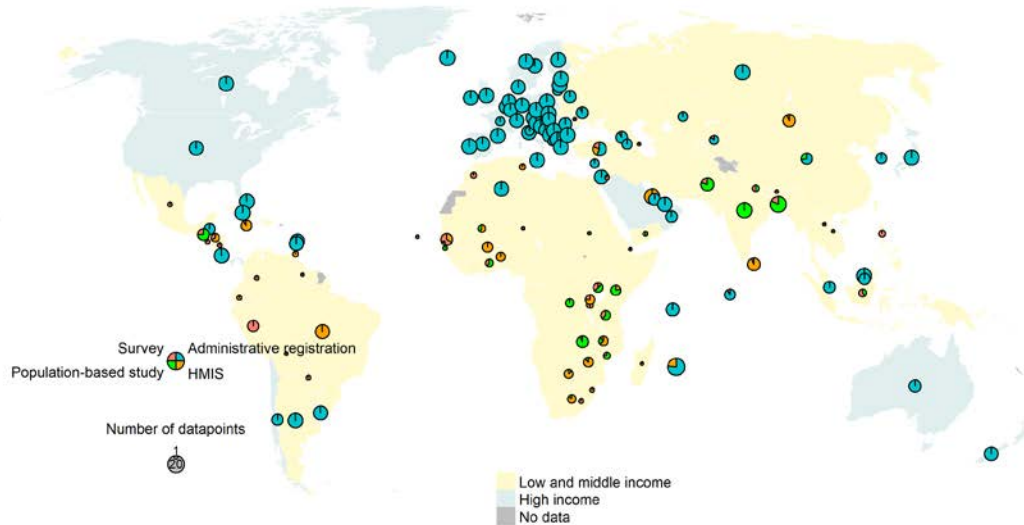

**Note:** This map does not reflect a position by UN IGME agencies or those of the institutions to which the authors are affiliated on the legal status of any country or territory or the delimitation of any frontiers.

The majority of administrative data comes from registration systems and health data systems including health management information systems (HMIS). Often data from registration systems record stillbirths

and live births using detailed gestational age and/or birthweight. HMIS data are collected in health facilities and in many countries, the District Health Information System-2 (DHIS2) is the commonest HMIS data platform.<sup>1</sup> Few HMIS systems currently report detailed gestational age and/or birthweight data on stillbirths.

Information on stillbirths in household surveys -such as such as the United States Agency for International Development (USAID)-supported Demographic and Health Surveys, Reproductive Health Survey (RHS) and the UNICEF-supported Multiple Indicator Cluster Surveys- are usually collected in two different ways: with a full pregnancy history; or with a reproductive calendar.<sup>2</sup> In the pregnancy history (PH), women of reproductive age are asked about all pregnancies in their lifetime. For each pregnancy they are asked to provide information on the duration of the pregnancy, the outcome of the pregnancy (e.g., miscarriage, stillbirth or livebirth) and the date of birth or end of pregnancy. In some surveys with PH modules the women were only asked whether they had a stillbirth and the date of the stillbirth. In these cases, a seven-month duration of pregnancy was assumed. In some survey-specific cases, a stillbirth was defined by the questionnaire as a fetal death occurring at the fifth or sixth month or later. PH data allow the calculation of stillbirth rates for specific time periods in the past. PH data allow to calculate stillbirth rates for specific time periods. For PH data, the stillbirth estimates were calculated for 5-year calendar year periods instead of the 5-year periods (as measured by up to 4 years prior to survey administration) preceding the survey. We calculated stillbirth rates for 5 intervals (e.g. 25 years), before the survey date. The most recent 5-year calendar period was included in the estimation model.

In the reproductive calendar (RC), women are asked about the duration and month of pregnancy end for pregnancies that did not end in a live birth in the last 60 months. RCs are usually administered alongside a full birth history. In reproductive calendars the stillbirth rate is the number of pregnancies that are terminated in the seventh month or later of pregnancy divided by the number of pregnancies that reached at least the seventh month. The RC data allow the calculation of stillbirth rates for the 5-year period preceding the survey. However, stillbirth estimates from the RC were not included in the model if estimates from the PH in the same survey were available.

Population-based study data were sought for all countries without high coverage of routine administrative data. The literature review undertaken for the previous stillbirth estimates<sup>3</sup> was updated through to 29 January 2019. In addition, further reanalyzed population-based stillbirth data were obtained from a WHO data call to maternal-newborn health experts.

Data were excluded if: they lacked a clear source of definition or clear information on data collection systems; a high proportion of reported stillbirths had unknown gestational age or birthweight; data were internally inconsistent; or coverage of live births in administrative data systems was estimated below 80 per cent. Vital registration data with incomplete coverage of child deaths were also excluded. Consistency across data sources was further assessed by comparing stillbirth estimates to similar data sources within the same country and expected global and regional patterns in mortality.

As part of the assessment of data quality, the plausibility of the ratio of stillbirth rates (measured as per 28 weeks of gestation or more definition) to neonatal mortality rates was assessed, by comparing these ratios to the distribution of ratios obtained from high-quality LMIC study data. High-quality LMIC study data is defined as population-based prospectively collected data with recruitment prior to 28 weeks of gestation, and follow-up to at least 28 days of age of live births.

In assessing the SBR:NMR ratio in the input database, the NMR from the data source was used where available. Where data sources had missing NMR data, the estimated NMR by UN IGME was used. For observations from HMIS and population studies on stillbirths, the ratio of observed SBR to the UN IGME NMR was calculated and the same exclusion approach applied so that observations with extremely low SBR compared to national level NMR were excluded. In summary, the mean and variance of the setting-specific SBR:NMR ratios is estimated, assuming that each observed SBR:NMR ratio is the sum of a setting-specific SBR:NMR ratio and random stochastic error. If stillbirths were under-reported relative to neonatal deaths for a specific observation, its associated observed ratio of SBR to NMR would be lower than the true ratio. To quantify whether an observed ratio is 'extremely' low, the probability of observing a ratio that is smaller than the observed ratio was calculated (taking account of the uncertainty associated with the observed ratio) using the distribution of ratios obtained from the high-quality data. If this probability was less than 0.05, the observation was excluded from the database. This approach was applied to all observations in the database with 28 weeks of gestation or more definitions and adjusted 28-week definitions.

### 2.3 Assumptions for definitional adjustment of stillbirth data

Data limitations necessitated some assumptions regarding definitional adjustments. For survey data, a seven-month duration of pregnancy is assumed to be equal to a 28-weeks or more definition. Further, in LMICs it is assumed that the SBR observed using a stillbirth definition of a birthweight of 1,000 grams or more is equal to the SBR observed using the 28 weeks of gestation or more definition, and similarly that the SBR observed with a birthweight of 500 grams or more definition equals the SBR observed with a 22 week of gestational age or more definition.

### 2.4 Stillbirth estimation model

Estimation and projection of stillbirth rates is undertaken using a statistical model for all country-years. In the model, the SBR is estimated assuming that the

Observed  $\log(\text{SBR}) = \log(\text{true SBR}) + \text{bias} + \text{measurement error}$

where the true SBR in a country for years 2000 to 2020 = country-intercept + SBR predicted by covariates + country-specific temporal smoothing process. The bias refers to the definitional adjustment bias and source type bias. The measurement error refers to the stochastic sampling error, source type error, and additional error incurred from definitional adjustments. The model produces estimates of the SBR for years 2000 to 2020 with uncertainty.

Full details on the estimation model and statistical methods are described in Wang et al <sup>4</sup>.

### 2.5 Calculation of stillbirths

The number of stillbirths in each country is calculated using the following formula: Number of stillbirths = livebirths \* SBR / (1 - SBR). The annual estimate of the number of live births in each country from the World Population Prospects: the 2019 revision<sup>5</sup> are used along with the UN IGME SBR estimates to calculate the estimated numbers of stillbirths.

### 3. Regional classification

The Regional classifications refer to the UNICEF's regional classification. The regions of Western Europe and Eastern Europe and Central Asia are a sub-regions of Europe and Central Asia and Eastern and Southern Africa and Western and Central Africa are the sub-regions of Sub-Saharan Africa. For further details please refer to <http://data.unicef.org/regionalclassifications/>.

In addition, the World Bank Group income classification from the year 2020 was used. For further details please refer to <<https://datahelpdesk.worldbank.org/knowledgebase/articles/906519>> accessed August 3, 2020.

#### **East Asia and Pacific**

Australia; Brunei Darussalam; Cambodia; China; Cook Islands; Democratic People's Republic of Korea; Fiji; Indonesia; Japan; Kiribati; Lao People's Democratic Republic; Malaysia; Marshall Islands; Micronesia (Federated States of); Mongolia; Myanmar; Nauru; New Zealand; Niue; Palau; Papua New Guinea; Philippines; Republic of Korea; Samoa; Singapore; Solomon Islands; Thailand; Timor-Leste; Tonga; Tuvalu; Vanuatu; Viet Nam

#### **Europe and Central Asia**

Eastern Europe and Central Asia; Western Europe

#### **Eastern Europe and Central Asia**

Albania; Armenia; Azerbaijan; Belarus; Bosnia and Herzegovina; Bulgaria; Croatia; Georgia; Kazakhstan; Kyrgyzstan; Montenegro; Republic of Moldova; Northern Macedonia; Romania; Russian Federation; Serbia; Tajikistan; Turkey; Turkmenistan; Ukraine; Uzbekistan

#### **Western Europe**

Andorra; Austria; Belgium; Cyprus; Czechia; Denmark; Estonia; Finland; France; Germany; Greece; Hungary; Iceland; Ireland; Italy; Latvia; Lithuania; Luxembourg; Malta; Monaco; Netherlands; Norway; Poland; Portugal; San Marino; Slovakia; Slovenia; Spain; Sweden; Switzerland; United Kingdom

#### **Latin America and Caribbean**

Antigua and Barbuda; Argentina; Bahamas; Barbados; Belize; Bolivia (Plurinational State of); Brazil; Chile; Colombia; Costa Rica; Cuba; Dominica; Dominican Republic; Ecuador; El Salvador; Grenada; Guatemala; Guyana; Haiti; Honduras; Jamaica; Mexico; Nicaragua; Panama; Paraguay; Peru; Saint Kitts and Nevis; Saint Lucia; Saint Vincent and the Grenadines; Suriname; Trinidad and Tobago; Uruguay; Venezuela (Bolivarian Republic of)

#### **Middle East and North Africa**

Algeria; Bahrain; Egypt; Iran (Islamic Republic of); Iraq; Israel; Jordan; Kuwait; Lebanon; Libya; Morocco; Oman; Qatar; Saudi Arabia; State of Palestine; Syrian Arab Republic; Tunisia; United Arab Emirates; Yemen

#### **North America**

Canada; United States of America

#### **South Asia**

Afghanistan; Bangladesh; Bhutan; India; Maldives; Nepal; Pakistan; Sri Lanka

#### **Sub-Saharan Africa**

Eastern and Southern Africa; West and Central Africa



### Eastern and Southern Africa

Angola; Botswana; Burundi; Comoros; Djibouti; Eritrea; Eswatini; Ethiopia; Kenya; Lesotho; Madagascar; Malawi; Mauritius; Mozambique; Namibia; Rwanda; Seychelles; Somalia; South Africa; South Sudan; Sudan; Uganda; United Republic of Tanzania; Zambia; Zimbabwe

### West and Central Africa

Benin; Burkina Faso; Cabo Verde; Cameroon; Central African Republic; Chad; Congo; Côte d'Ivoire; Democratic Republic of the Congo; Equatorial Guinea; Gabon; Gambia; Ghana; Guinea; Guinea-Bissau; Liberia; Mali; Mauritania; Niger; Nigeria; Sao Tome and Principe; Senegal; Sierra Leone; Togo

**Map A1: UNICEF regional classifications.**

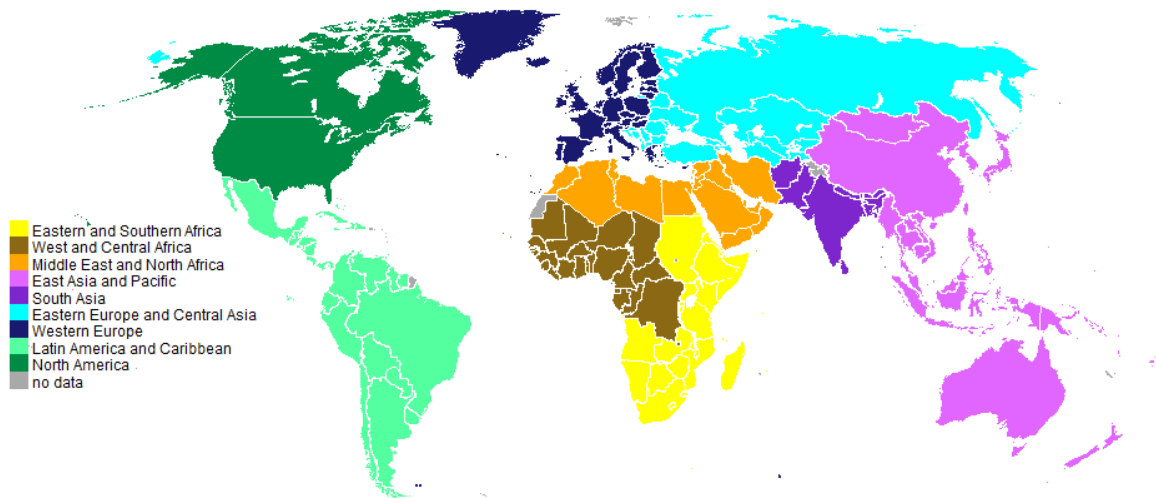

**Note:** This map does not reflect a position by UN IGME agencies or those of the institutions to which the authors are affiliated on the legal status of any country or territory or the delimitation of any frontiers.

#### 4. Supplementary Tables and Figures

Table A1: Data availability by region and inclusion

| Region                          | Included datapoints | Available datapoints |
|---------------------------------|---------------------|----------------------|
| East Asia and Pacific           | 154                 | 256                  |
| Eastern and Southern Africa     | 124                 | 281                  |
| Eastern Europe and Central Asia | 218                 | 399                  |
| Latin America and Caribbean     | 213                 | 463                  |
| Middle East and North Africa    | 106                 | 237                  |
| North America                   | 36                  | 36                   |
| South Asia                      | 87                  | 188                  |
| West and Central Africa         | 48                  | 165                  |
| Western Europe                  | 499                 | 561                  |
| <b>Total</b>                    | <b>1,485</b>        | <b>2,586</b>         |

Table A2: Data availability and inclusion by data source type

| Source                                      | Number of country-years available | Number included quality country-years |
|---------------------------------------------|-----------------------------------|---------------------------------------|
| Administrative registration system          | 1,738                             | 1,157                                 |
| Health Management Information System (HMIS) | 506                               | 162                                   |
| Household survey                            | 226                               | 95                                    |
| Population based studies                    | 363                               | 117                                   |

Table A3: Definitional adjustment factors

| Definition of stillbirths           | LMIC | Bias on log-scale:<br>$\log(\text{SBR}[\text{alternative}]) - \log(\text{SBR}[28])$ | Standard deviation log-scale |
|-------------------------------------|------|-------------------------------------------------------------------------------------|------------------------------|
| 22 or more weeks of gestation       | Yes  | 0.2                                                                                 | 0.1                          |
| 22 weeks or more weeks of gestation | No   | 0.4                                                                                 | 0.2                          |
| 24 weeks or more weeks of gestation | No   | 0.2                                                                                 | 0.2                          |
| Birth weight of 1000 grams or more  | No   | -0.1                                                                                | 0.1                          |
| Birth weight 500 grams or more      | No   | 0.2                                                                                 | 0.1                          |

Table A4: Source type biases estimates and assumptions

| Source                                      | Bias log-scale, RR | Source type standard deviation | Assumption                                        |
|---------------------------------------------|--------------------|--------------------------------|---------------------------------------------------|
| Administrative registration systems         | 0                  | 0.02                           | 0 bias. Estimated standard deviation              |
| Health Management Information System (HMIS) | 0                  | 0.05                           | 0 bias. Estimated standard deviation              |
| Population based studies                    | 0                  | 0.24                           | 0 bias. Estimated standard deviation              |
| Household survey                            | -0.2; 0.85         | 0.14                           | $N(0,25)T[,0]$ bias. Estimated standard deviation |

Table A5: Covariates used in stillbirth estimation model and corresponding estimated coefficients

| Covariate                                                                                                                                                                                               | Data Source                                                                                           | Estimate                 |
|---------------------------------------------------------------------------------------------------------------------------------------------------------------------------------------------------------|-------------------------------------------------------------------------------------------------------|--------------------------|
| GNI per capita based on purchasing power parity (PPP). PPP GNI is gross national income (GNI) converted to international dollars using purchasing power parity rates                                    | World Bank: World Development Indicators database, World Bank                                         | -0.116<br>(-0.19, -0.04) |
| Neonatal mortality rate: Probability of dying in the first 28 days of life, expressed per 1,000 live births                                                                                             | UN IGME: Modelled based on data from vital registration, household survey and population census       | 0.401<br>(0.32, 0.48)    |
| Low birthweight: Percentage of live births that weighed less than 2,500 grams (less than 5.51 pounds)                                                                                                   | UNICEF/WHO Low birthweight (LBW) estimates, 2019 Edition                                              | 0.097<br>(0.04, 0.15)    |
| Antenatal care 4+ visits: Percentage of women (aged 15–49 years) attended at least four times during pregnancy by any provider                                                                          | WHO/UNICEF: DHS, MICS and other national household surveys                                            | -0.052<br>(-0.11, 0.01)  |
| Mean years of schooling (female): Average number of years of education received by females aged 25 years and older, converted from educational attainment levels using official durations of each level | UNDP: Estimated by Barro and Lee (2016) using population census, MICS, DHS and other national surveys | -0.062<br>(-0.12, -0.01) |
| C-section rate: Percentage of deliveries by C-section                                                                                                                                                   | UNICEF: DHS, MICS, RHS and other national household surveys                                           | -0.047<br>(-0.09, 0)     |

Note: Numbers in brackets are 95 per cent uncertainty intervals.

Table A6: Rates and number of stillbirths, by country or territory

Note: Numbers in brackets are 90 per cent uncertainty intervals.

| Country/territory   | Stillbirth rate<br>(stillbirths per 1,000 total births) |                      |                      | Number of stillbirths   |                         |                         |
|---------------------|---------------------------------------------------------|----------------------|----------------------|-------------------------|-------------------------|-------------------------|
|                     | 2000                                                    | 2010                 | 2019                 | 2000                    | 2010                    | 2019                    |
| Afghanistan         | 36.9<br>(22.1, 63.4)                                    | 32.6<br>(20.6, 53.2) | 28.4<br>(16.8, 47.3) | 39296<br>(25167, 63161) | 39734<br>(26424, 60832) | 35384<br>(22732, 55529) |
| Albania             | 6.4<br>(4.6, 8.9)                                       | 4.5<br>(4.0, 5.2)    | 4.1<br>(3.3, 5.0)    | 329<br>(249, 430)       | 161<br>(144, 180)       | 137<br>(114, 164)       |
| Algeria             | 17.2<br>(14.7, 20.0)                                    | 12.1<br>(10.7, 13.5) | 9.5<br>(7.7, 11.6)   | 10605<br>(9293, 12091)  | 10796<br>(9793, 11884)  | 9674<br>(8102, 11477)   |
| Andorra             | 3.5<br>(2.5, 5.1)                                       | 2.6<br>(1.9, 3.5)    | 2.1<br>(1.4, 3.0)    | 3<br>(2, 3)             | 2<br>(2, 3)             | 1<br>(1, 2)             |
| Angola              | 30.0<br>(18.3, 50.0)                                    | 23.4<br>(14.8, 37.0) | 19.8<br>(12.2, 32.7) | 24539<br>(16046, 38491) | 25603<br>(17303, 38545) | 25967<br>(17234, 40126) |
| Antigua and Barbuda | 8.8<br>(5.4, 14.7)                                      | 6.8<br>(4.2, 10.8)   | 5.5<br>(3.2, 9.0)    | 13<br>(9, 20)           | 10<br>(7, 15)           | 8<br>(5, 12)            |
| Argentina           | 7.8<br>(7.5, 8.1)                                       | 4.9<br>(4.7, 5.0)    | 5.3<br>(4.9, 5.8)    | 5669<br>(5489, 5852)    | 3624<br>(3519, 3743)    | 4042<br>(3751, 4353)    |
| Armenia             | 20.7<br>(14.9, 28.4)                                    | 15.1<br>(13.5, 16.9) | 12.9<br>(11.1, 14.8) | 835<br>(632, 1108)      | 681<br>(619, 749)       | 526<br>(466, 594)       |
| Australia           | 3.2<br>(3.0, 3.4)                                       | 2.9<br>(2.7, 3.0)    | 2.2<br>(1.9, 2.6)    | 794<br>(754, 836)       | 868<br>(828, 909)       | 707<br>(613, 819)       |
| Austria             | 2.8<br>(2.6, 3.1)                                       | 2.5<br>(2.3, 2.7)    | 2.2<br>(1.9, 2.5)    | 226<br>(209, 245)       | 194<br>(182, 206)       | 195<br>(176, 218)       |
| Azerbaijan          | 19.2                                                    | 12.6                 | 9.0                  | 2753                    | 2093                    | 1466                    |

|                                  |                      |                      |                      |                            |                            |                          |
|----------------------------------|----------------------|----------------------|----------------------|----------------------------|----------------------------|--------------------------|
|                                  | (13.4, 27.6)         | (8.9, 18.4)          | (5.9, 14.0)          | (2031, 3749)               | (1540, 2845)               | (1020, 2130)             |
| Bahamas                          | 12.5<br>(10.8, 14.4) | 13.3<br>(12.0, 14.6) | 11.6<br>(9.9, 13.7)  | 66<br>(59, 75)             | 71<br>(65, 77)             | 63<br>(55, 73)           |
| Bahrain                          | 8.5<br>(7.0, 10.3)   | 6.2<br>(5.6, 6.8)    | 5.9<br>(5.0, 7.0)    | 128<br>(108, 150)          | 123<br>(114, 133)          | 131<br>(112, 152)        |
| Bangladesh                       | 41.4<br>(34.1, 50.3) | 29.7<br>(26.0, 34.0) | 24.3<br>(19.9, 29.6) | 151590<br>(128018, 180265) | 95370<br>(85134, 107036)   | 72508<br>(60932, 86073)  |
| Barbados                         | 8.4<br>(5.0, 14.0)   | 8.4<br>(5.3, 13.1)   | 7.4<br>(4.5, 12.3)   | 32<br>(21, 49)             | 28<br>(19, 41)             | 23<br>(15, 35)           |
| Belarus                          | 5.0<br>(3.8, 6.4)    | 2.5<br>(2.3, 2.6)    | 2.0<br>(1.8, 2.3)    | 443<br>(359, 545)          | 273<br>(257, 288)          | 222<br>(199, 247)        |
| Belgium                          | 3.4<br>(3.1, 3.7)    | 3.1<br>(2.9, 3.3)    | 2.8<br>(2.4, 3.4)    | 388<br>(363, 413)          | 393<br>(373, 413)          | 354<br>(303, 411)        |
| Belize                           | 11.2<br>(8.4, 15.1)  | 8.7<br>(7.6, 10.1)   | 6.5<br>(5.5, 7.8)    | 83<br>(65, 106)            | 67<br>(59, 75)             | 53<br>(46, 61)           |
| Benin                            | 27.2<br>(20.2, 37.1) | 24.6<br>(22.9, 26.4) | 20.3<br>(17.1, 24.3) | 8156<br>(6355, 10623)      | 9141<br>(8603, 9699)       | 8795<br>(7578, 10257)    |
| Bhutan                           | 16.3<br>(11.0, 24.3) | 12.2<br>(9.4, 15.7)  | 9.7<br>(7.5, 12.6)   | 265<br>(191, 369)          | 165<br>(131, 205)          | 127<br>(101, 158)        |
| Bolivia (Plurinational State of) | 15.5<br>(10.2, 23.7) | 12.0<br>(8.6, 16.5)  | 8.9<br>(6.1, 12.9)   | 4033<br>(2801, 5750)       | 3048<br>(2305, 4029)       | 2219<br>(1604, 3039)     |
| Bosnia and Herzegovina           | 4.0<br>(3.4, 4.7)    | 3.2<br>(2.9, 3.6)    | 2.8<br>(2.2, 3.4)    | 164<br>(142, 188)          | 110<br>(101, 120)          | 73<br>(61, 87)           |
| Botswana                         | 11.8<br>(10.8, 12.9) | 15.5<br>(14.4, 16.7) | 15.2<br>(12.8, 18.1) | 574<br>(531, 623)          | 869<br>(813, 929)          | 862<br>(744, 998)        |
| Brazil                           | 10.0<br>(8.8, 11.2)  | 8.5<br>(7.8, 9.3)    | 7.5<br>(6.1, 9.2)    | 35340<br>(31945, 39093)    | 25632<br>(23843, 27654)    | 21771<br>(18361, 25773)  |
| Brunei Darussalam                | 5.1<br>(4.2, 6.1)    | 4.3<br>(3.7, 5.0)    | 4.6<br>(3.7, 5.7)    | 39<br>(33, 45)             | 29<br>(26, 33)             | 29<br>(24, 35)           |
| Bulgaria                         | 7.6<br>(7.1, 8.2)    | 6.8<br>(6.4, 7.2)    | 5.0<br>(4.6, 5.5)    | 501<br>(472, 533)          | 503<br>(479, 527)          | 312<br>(291, 335)        |
| Burkina Faso                     | 29.7<br>(21.2, 41.6) | 23.7<br>(21.3, 26.4) | 19.5<br>(17.7, 21.4) | 16462<br>(12466, 21936)    | 16031<br>(14646, 17627)    | 15141<br>(13953, 16440)  |
| Burundi                          | 30.4<br>(21.7, 42.9) | 26.7<br>(21.7, 32.5) | 26.1<br>(24.2, 28.0) | 8736<br>(6562, 11671)      | 10212<br>(8579, 12135)     | 11880<br>(11146, 12607)  |
| Cabo Verde                       | 15.8<br>(9.9, 24.9)  | 14.3<br>(9.2, 22.4)  | 10.9<br>(6.8, 17.8)  | 189<br>(128, 283)          | 160<br>(111, 233)          | 116<br>(78, 176)         |
| Cambodia                         | 25.5<br>(14.9, 43.7) | 16.5<br>(10.3, 26.6) | 12.4<br>(7.6, 20.9)  | 8905<br>(5651, 14137)      | 6146<br>(4095, 9256)       | 4573<br>(3008, 7082)     |
| Cameroon                         | 23.9<br>(14.6, 39.2) | 21.7<br>(13.6, 34.7) | 19.4<br>(11.5, 31.7) | 15798<br>(10312, 24582)    | 17831<br>(12059, 26556)    | 17872<br>(11650, 27137)  |
| Canada                           | 3.2<br>(3.0, 3.4)    | 2.9<br>(2.8, 3.1)    | 2.8<br>(2.5, 3.1)    | 1075<br>(1025, 1126)       | 1114<br>(1071, 1157)       | 1072<br>(987, 1164)      |
| Central African Republic         | 34.0<br>(20.5, 56.2) | 32.5<br>(20.8, 51.2) | 29.8<br>(18.5, 48.4) | 5298<br>(3448, 8211)       | 5671<br>(3836, 8372)       | 5147<br>(3410, 7845)     |
| Chad                             | 34.7<br>(20.5, 57.8) | 30.1<br>(18.7, 48.9) | 27.5<br>(16.7, 45.5) | 15404<br>(9868, 24233)     | 17361<br>(11722, 26067)    | 18802<br>(12297, 28597)  |
| Chile                            | 4.2<br>(3.3, 5.3)    | 3.7<br>(3.5, 3.9)    | 3.1<br>(2.6, 3.7)    | 1062<br>(866, 1302)        | 922<br>(885, 960)          | 711<br>(617, 821)        |
| China                            | 15.0<br>(13.2, 17.1) | 10.2<br>(9.3, 11.1)  | 5.5<br>(4.9, 6.3)    | 268416<br>(240484, 298695) | 179677<br>(165959, 194298) | 92170<br>(82934, 102854) |
| Colombia                         | 9.6                  | 8.4                  | 7.1                  | 8517                       | 6455                       | 5237                     |

|                                       |              |              |              |                 |                 |                 |
|---------------------------------------|--------------|--------------|--------------|-----------------|-----------------|-----------------|
|                                       | (7.1, 12.9)  | (6.6, 10.8)  | (5.2, 9.9)   | (6672, 10888)   | (5224, 7989)    | (4016, 6963)    |
| Comoros                               | 30.3         | 28.0         | 24.6         | 636             | 702             | 674             |
|                                       | (18.2, 50.5) | (17.6, 44.5) | (14.9, 39.8) | (412, 1006)     | (472, 1065)     | (440, 1032)     |
| Congo                                 | 20.6         | 17.1         | 15.0         | 2535            | 2748            | 2664            |
|                                       | (12.3, 33.5) | (10.6, 27.3) | (9.2, 24.5)  | (1650, 3839)    | (1844, 4070)    | (1746, 4070)    |
| Cook Islands                          | 9.6          | 6.9          | 5.2          | 4               | 2               | 1               |
|                                       | (6.9, 13.3)  | (5.0, 9.3)   | (3.5, 7.5)   | (3, 6)          | (2, 3)          | (1, 2)          |
| Costa Rica                            | 4.9          | 5.1          | 4.5          | 373             | 367             | 311             |
|                                       | (4.1, 5.7)   | (4.8, 5.4)   | (4.0, 5.0)   | (327, 425)      | (348, 387)      | (281, 344)      |
| Côte d'Ivoire                         | 30.2         | 26.8         | 23.2         | 20940           | 21259           | 21735           |
|                                       | (18.1, 50.6) | (16.9, 42.7) | (13.8, 38.3) | (13680, 32534)  | (14323, 32010)  | (14072, 33571)  |
| Croatia                               | 5.2          | 3.4          | 3.0          | 234             | 144             | 109             |
|                                       | (4.7, 5.7)   | (3.1, 3.6)   | (2.6, 3.5)   | (215, 256)      | (135, 154)      | (96, 123)       |
| Cuba                                  | 10.9         | 6.9          | 6.9          | 1605            | 868             | 784             |
|                                       | (10.4, 11.5) | (6.5, 7.2)   | (6.5, 7.4)   | (1538, 1675)    | (833, 904)      | (744, 827)      |
| Cyprus                                | 4.4          | 3.0          | 2.5          | 55              | 39              | 31              |
|                                       | (3.1, 6.2)   | (2.5, 3.7)   | (2.0, 3.2)   | (41, 74)        | (33, 46)        | (26, 38)        |
| Czechia                               | 2.8          | 2.6          | 2.6          | 252             | 288             | 291             |
|                                       | (2.6, 3.1)   | (2.4, 2.7)   | (2.4, 2.9)   | (234, 271)      | (273, 305)      | (271, 312)      |
| Democratic People's Republic of Korea | 13.7         | 10.9         | 8.5          | 5729            | 3785            | 3042            |
|                                       | (8.4, 22.7)  | (6.9, 17.3)  | (5.3, 13.8)  | (3734, 8814)    | (2567, 5608)    | (2023, 4571)    |
| Democratic Republic of the Congo      | 33.8         | 30.1         | 27.2         | 76296           | 90155           | 98871           |
|                                       | (22.9, 49.4) | (23.2, 38.6) | (21.7, 34.3) | (54639, 107020) | (72648, 112433) | (80995, 120773) |
| Denmark                               | 3.1          | 2.1          | 2.0          | 207             | 131             | 126             |
|                                       | (2.8, 3.6)   | (1.9, 2.3)   | (1.6, 2.5)   | (187, 229)      | (122, 142)      | (105, 149)      |
| Djibouti                              | 34.9         | 32.2         | 27.9         | 812             | 710             | 586             |
|                                       | (24.7, 49.6) | (27.1, 38.2) | (21.6, 36.5) | (604, 1100)     | (614, 826)      | (468, 742)      |
| Dominica                              | 11.5         | 12.6         | 13.7         | 14              | 11              | 14              |
|                                       | (6.7, 18.8)  | (7.9, 19.6)  | (8.3, 22.4)  | (9, 21)         | (8, 17)         | (9, 21)         |
| Dominican Republic                    | 14.4         | 12.6         | 10.7         | 3062            | 2638            | 2224            |
|                                       | (8.7, 23.6)  | (8.0, 20.0)  | (6.4, 17.9)  | (1984, 4722)    | (1762, 3936)    | (1426, 3447)    |
| Ecuador                               | 15.7         | 11.1         | 8.7          | 5159            | 3615            | 2966            |
|                                       | (11.9, 20.4) | (8.9, 13.7)  | (6.2, 12.4)  | (4088, 6450)    | (3007, 4365)    | (2209, 3994)    |
| Egypt                                 | 17.5         | 12.3         | 9.0          | 31828           | 28380           | 23527           |
|                                       | (10.5, 29.1) | (7.8, 19.8)  | (5.5, 15.6)  | (20771, 49478)  | (19363, 42642)  | (15545, 36889)  |
| El Salvador                           | 20.1         | 12.6         | 10.1         | 3001            | 1551            | 1189            |
|                                       | (15.8, 25.2) | (9.5, 16.7)  | (6.7, 14.9)  | (2427, 3691)    | (1219, 1963)    | (848, 1643)     |
| Equatorial Guinea                     | 18.0         | 15.8         | 15.1         | 460             | 571             | 681             |
|                                       | (10.7, 30.4) | (9.7, 25.8)  | (9.1, 25.3)  | (297, 725)      | (378, 869)      | (441, 1058)     |
| Eritrea                               | 23.2         | 20.5         | 18.3         | 1835            | 2380            | 1945            |
|                                       | (14.3, 38.1) | (13.3, 32.6) | (11.1, 30.2) | (1200, 2831)    | (1633, 3525)    | (1285, 2936)    |
| Estonia                               | 4.7          | 3.0          | 2.2          | 60              | 46              | 29              |
|                                       | (4.1, 5.4)   | (2.7, 3.4)   | (1.8, 2.6)   | (53, 67)        | (42, 50)        | (26, 34)        |
| Eswatini                              | 15.7         | 14.3         | 13.2         | 513             | 471             | 398             |
|                                       | (11.2, 21.9) | (10.6, 19.0) | (8.9, 19.4)  | (388, 684)      | (366, 601)      | (287, 559)      |
| Ethiopia                              | 35.8         | 31.1         | 24.6         | 107622          | 101121          | 90323           |
|                                       | (21.7, 59.4) | (19.4, 49.5) | (15.1, 40.5) | (69249, 168719) | (67533, 152356) | (58886, 139027) |
| Fiji                                  | 10.2         | 10.0         | 8.6          | 206             | 191             | 161             |
|                                       | (8.0, 13.0)  | (9.1, 10.9)  | (7.0, 10.5)  | (166, 252)      | (176, 207)      | (135, 192)      |
| Finland                               | 2.7          | 2.1          | 2.0          | 153             | 124             | 102             |
|                                       | (2.4, 3.0)   | (1.9, 2.2)   | (1.7, 2.4)   | (140, 168)      | (115, 133)      | (90, 115)       |
| France                                | 5.0          | 4.5          | 4.3          | 3800            | 3564            | 3157            |

|                            |              |              |              |                   |                  |                  |
|----------------------------|--------------|--------------|--------------|-------------------|------------------|------------------|
|                            | (4.5, 5.6)   | (4.0, 5.0)   | (3.7, 5.1)   | (3472, 4166)      | (3235, 3952)     | (2753, 3619)     |
| Gabon                      | 17.6         | 16.0         | 13.8         | 733               | 885              | 940              |
|                            | (10.6, 29.7) | (10.0, 25.8) | (8.4, 22.5)  | (473, 1159)       | (591, 1316)      | (612, 1431)      |
| Gambia                     | 27.1         | 24.5         | 21.9         | 1574              | 1848             | 2001             |
|                            | (17.5, 41.7) | (17.2, 35.1) | (14.6, 33.2) | (1084, 2273)      | (1372, 2508)     | (1414, 2875)     |
| Georgia                    | 15.2         | 9.3          | 5.7          | 827               | 532              | 304              |
|                            | (11.9, 19.4) | (8.4, 10.2)  | (5.3, 6.2)   | (677, 1022)       | (489, 579)       | (282, 326)       |
| Germany                    | 2.9          | 2.3          | 2.7          | 2209              | 1550             | 2137             |
|                            | (2.7, 3.2)   | (2.2, 2.4)   | (2.3, 3.2)   | (2027, 2400)      | (1480, 1624)     | (1861, 2465)     |
| Ghana                      | 28.7         | 25.1         | 21.7         | 20347             | 20687            | 19529            |
|                            | (22.0, 37.6) | (20.8, 30.5) | (16.4, 28.3) | (16165, 25716)    | (17447, 24481)   | (15409, 24690)   |
| Greece                     | 4.6          | 3.3          | 3.1          | 491               | 345              | 244              |
|                            | (4.2, 4.9)   | (3.1, 3.5)   | (2.8, 3.5)   | (462, 522)        | (328, 363)       | (221, 270)       |
| Grenada                    | 10.2         | 9.9          | 9.8          | 20                | 19               | 18               |
|                            | (6.2, 17.1)  | (6.2, 15.6)  | (6.0, 16.1)  | (13, 30)          | (13, 27)         | (12, 27)         |
| Guatemala                  | 19.9         | 15.9         | 12.7         | 8391              | 6576             | 5498             |
|                            | (15.8, 24.9) | (13.5, 18.7) | (10.2, 15.9) | (6888, 10224)     | (5723, 7560)     | (4576, 6618)     |
| Guinea                     | 30.9         | 26.8         | 25.2         | 11583             | 11147            | 11895            |
|                            | (19.0, 51.3) | (16.9, 42.8) | (15.5, 40.8) | (7613, 18003)     | (7514, 16659)    | (7850, 18224)    |
| Guinea-Bissau              | 44.8         | 38.2         | 32.2         | 2366              | 2370             | 2209             |
|                            | (32.2, 64.4) | (28.3, 51.8) | (22.0, 47.0) | (1750, 3235)      | (1819, 3092)     | (1602, 3076)     |
| Guyana                     | 18.1         | 16.1         | 13.8         | 356               | 260              | 216              |
|                            | (12.3, 26.3) | (11.4, 22.8) | (9.1, 21.2)  | (257, 500)        | (194, 352)       | (151, 313)       |
| Haiti                      | 23.8         | 22.6         | 19.9         | 6562              | 6361             | 5470             |
|                            | (14.6, 40.1) | (14.4, 35.5) | (12.1, 32.7) | (4284, 10226)     | (4312, 9420)     | (3595, 8293)     |
| Honduras                   | 13.9         | 10.1         | 8.5          | 3133              | 2112             | 1787             |
|                            | (10.7, 18.1) | (8.9, 11.5)  | (7.1, 10.1)  | (2507, 3938)      | (1892, 2363)     | (1533, 2068)     |
| Hungary                    | 4.3          | 3.5          | 3.3          | 414               | 324              | 303              |
|                            | (4.0, 4.6)   | (3.3, 3.7)   | (2.7, 4.0)   | (389, 441)        | (308, 342)       | (254, 359)       |
| Iceland                    | 2.7          | 2.1          | 1.9          | 11                | 10               | 8                |
|                            | (2.2, 3.4)   | (1.7, 2.5)   | (1.5, 2.4)   | (9, 13)           | (8, 11)          | (6, 9)           |
| India                      | 29.6         | 20.2         | 13.9         | 852386            | 535683           | 340622           |
|                            | (21.9, 40.2) | (17.3, 23.5) | (11.4, 17.0) | (675197, 1086996) | (487933, 629195) | (328322, 471827) |
| Indonesia                  | 15.2         | 11.9         | 9.5          | 71240             | 60411            | 45857            |
|                            | (11.8, 19.9) | (9.8, 14.4)  | (6.9, 12.8)  | (56944, 89594)    | (51591, 71494)   | (35460, 58987)   |
| Iran (Islamic Republic of) | 11.3         | 8.4          | 6.8          | 13282             | 11414            | 10367            |
|                            | (6.6, 19.7)  | (5.1, 14.1)  | (3.9, 11.5)  | (8452, 21123)     | (7504, 17541)    | (6676, 16275)    |
| Iraq                       | 16.4         | 14.4         | 11.7         | 14028             | 14767            | 13270            |
|                            | (9.6, 27.6)  | (9.0, 23.1)  | (7.1, 19.4)  | (9033, 22104)     | (9832, 22195)    | (8633, 20352)    |
| Ireland                    | 5.0          | 3.7          | 2.8          | 276               | 267              | 172              |
|                            | (4.5, 5.4)   | (3.5, 3.9)   | (2.4, 3.3)   | (256, 297)        | (253, 282)       | (149, 196)       |
| Israel                     | 4.1          | 2.7          | 2.8          | 522               | 430              | 472              |
|                            | (3.7, 4.6)   | (2.6, 2.9)   | (2.3, 3.3)   | (479, 572)        | (409, 452)       | (409, 548)       |
| Italy                      | 2.8          | 2.4          | 2.4          | 1507              | 1319             | 1070             |
|                            | (2.4, 3.3)   | (2.2, 2.5)   | (2.1, 2.7)   | (1315, 1732)      | (1260, 1386)     | (954, 1202)      |
| Jamaica                    | 18.9         | 15.6         | 12.7         | 1090              | 791              | 602              |
|                            | (15.8, 22.7) | (13.5, 17.9) | (9.2, 17.6)  | (930, 1273)       | (702, 891)       | (460, 784)       |
| Japan                      | 2.5          | 2.0          | 1.5          | 2967              | 2255             | 1407             |
|                            | (2.4, 2.7)   | (2.0, 2.1)   | (1.4, 1.7)   | (2863, 3079)      | (2182, 2330)     | (1297, 1525)     |
| Jordan                     | 12.2         | 10.0         | 8.8          | 2009              | 2117             | 1914             |
|                            | (9.4, 15.9)  | (7.5, 13.2)  | (6.0, 13.0)  | (1601, 2520)      | (1674, 2691)     | (1390, 2649)     |
| Kazakhstan                 | 11.2         | 7.4          | 5.4          | 2670              | 2762             | 2040             |
|                            | (8.3, 14.9)  | (6.9, 8.1)   | (4.3, 6.7)   | (2085, 3412)      | (2581, 2949)     | (1718, 2443)     |

|                                  |                      |                      |                      |                         |                         |                         |
|----------------------------------|----------------------|----------------------|----------------------|-------------------------|-------------------------|-------------------------|
| Kenya                            | 22.5<br>(15.7, 32.2) | 20.6<br>(16.4, 25.5) | 19.7<br>(18.3, 21.1) | 29465<br>(21873, 40409) | 31077<br>(25725, 37503) | 30030<br>(28181, 31807) |
| Kiribati                         | 17.0<br>(10.3, 28.0) | 15.6<br>(9.7, 25.0)  | 14.3<br>(8.7, 24.1)  | 45<br>(29, 69)          | 48<br>(32, 72)          | 47<br>(31, 73)          |
| Kuwait                           | 7.1<br>(4.2, 11.6)   | 6.4<br>(4.0, 10.1)   | 5.8<br>(3.6, 9.6)    | 316<br>(203, 492)       | 379<br>(253, 570)       | 325<br>(215, 500)       |
| Kyrgyzstan                       | 10.8<br>(8.0, 14.6)  | 9.0<br>(8.5, 9.5)    | 6.8<br>(6.2, 7.5)    | 1151<br>(891, 1483)     | 1327<br>(1269, 1388)    | 1051<br>(965, 1144)     |
| Lao People's Democratic Republic | 24.3<br>(15.0, 39.0) | 20.9<br>(13.6, 31.1) | 16.6<br>(10.6, 25.4) | 4247<br>(2812, 6371)    | 3586<br>(2496, 5049)    | 2791<br>(1919, 4065)    |
| Latvia                           | 6.0<br>(5.3, 6.7)    | 4.2<br>(3.8, 4.6)    | 3.2<br>(2.8, 3.8)    | 116<br>(105, 128)       | 93<br>(86, 101)         | 65<br>(57, 75)          |
| Lebanon                          | 10.8<br>(6.4, 18.2)  | 7.6<br>(4.7, 12.1)   | 6.3<br>(3.8, 10.4)   | 915<br>(603, 1421)      | 664<br>(449, 987)       | 745<br>(485, 1147)      |
| Lesotho                          | 35.6<br>(26.7, 45.9) | 30.4<br>(23.4, 38.9) | 27.9<br>(19.6, 39.7) | 2292<br>(1796, 2875)    | 1824<br>(1450, 2268)    | 1611<br>(1184, 2178)    |
| Liberia                          | 29.8<br>(18.2, 49.3) | 25.4<br>(16.1, 40.1) | 24.2<br>(15.0, 39.6) | 3594<br>(2314, 5485)    | 3739<br>(2537, 5554)    | 4008<br>(2647, 6137)    |
| Libya                            | 13.8<br>(8.3, 23.6)  | 10.4<br>(6.6, 16.6)  | 8.8<br>(5.3, 14.6)   | 1631<br>(1062, 2557)    | 1417<br>(952, 2097)     | 1094<br>(717, 1653)     |
| Lithuania                        | 4.5<br>(3.3, 6.2)    | 3.4<br>(3.1, 3.8)    | 2.8<br>(2.4, 3.2)    | 152<br>(116, 197)       | 109<br>(99, 120)        | 78<br>(69, 89)          |
| Luxembourg                       | 3.6<br>(3.0, 4.4)    | 3.5<br>(3.0, 4.0)    | 3.4<br>(2.6, 4.3)    | 20<br>(17, 23)          | 20<br>(18, 23)          | 22<br>(18, 27)          |
| Madagascar                       | 20.2<br>(14.4, 28.6) | 17.5<br>(12.9, 23.7) | 16.5<br>(11.1, 24.5) | 13453<br>(10015, 18119) | 13261<br>(10261, 17125) | 14671<br>(10469, 20545) |
| Malawi                           | 22.2<br>(17.2, 29.0) | 20.0<br>(17.0, 23.2) | 16.3<br>(14.7, 18.1) | 11042<br>(8848, 13871)  | 11947<br>(10447, 13711) | 10440<br>(9524, 11467)  |
| Malaysia                         | 4.9<br>(3.8, 6.4)    | 4.5<br>(4.3, 4.7)    | 5.5<br>(5.0, 6.0)    | 2514<br>(1996, 3168)    | 2184<br>(2114, 2258)    | 2921<br>(2705, 3156)    |
| Maldives                         | 13.7<br>(10.5, 18.0) | 7.6<br>(6.7, 8.6)    | 5.8<br>(4.4, 7.5)    | 84<br>(67, 106)         | 56<br>(51, 62)          | 41<br>(33, 51)          |
| Mali                             | 28.2<br>(19.5, 41.0) | 23.0<br>(18.0, 29.7) | 19.7<br>(18.4, 21.2) | 15592<br>(11354, 21704) | 16391<br>(13325, 20375) | 16251<br>(15326, 17293) |
| Malta                            | 3.9<br>(3.1, 4.8)    | 3.6<br>(3.1, 4.2)    | 3.0<br>(2.4, 3.8)    | 17<br>(14, 20)          | 14<br>(13, 16)          | 13<br>(11, 16)          |
| Marshall Islands                 | 12.0<br>(7.3, 20.6)  | 11.7<br>(7.3, 19.2)  | 10.9<br>(6.5, 18.2)  | 23<br>(15, 36)          | 20<br>(13, 30)          | 15<br>(10, 23)          |
| Mauritania                       | 30.0<br>(18.1, 49.7) | 25.4<br>(15.9, 40.8) | 22.0<br>(13.3, 35.9) | 3117<br>(2004, 4840)    | 3341<br>(2238, 5004)    | 3385<br>(2208, 5160)    |
| Mauritius                        | 12.5<br>(11.5, 13.7) | 9.0<br>(8.3, 9.7)    | 10.3<br>(9.3, 11.4)  | 255<br>(236, 275)       | 136<br>(127, 145)       | 133<br>(121, 146)       |
| Mexico                           | 9.6<br>(6.7, 13.9)   | 7.3<br>(5.9, 9.2)    | 6.8<br>(5.3, 8.8)    | 22850<br>(16822, 31362) | 16826<br>(13901, 20456) | 15136<br>(12200, 18839) |
| Micronesia (Federated States of) | 15.1<br>(9.2, 25.6)  | 13.2<br>(8.3, 21.5)  | 11.7<br>(7.2, 19.6)  | 50<br>(32, 77)          | 34<br>(23, 51)          | 31<br>(20, 47)          |
| Monaco                           | 2.2<br>(1.3, 3.8)    | 1.7<br>(1.0, 2.9)    | 1.4<br>(0.8, 2.5)    | 1<br>(1, 1)             | 1<br>(0, 1)             | 1<br>(0, 1)             |
| Mongolia                         | 12.1<br>(10.7, 13.7) | 6.7<br>(6.3, 7.2)    | 5.2<br>(4.2, 6.6)    | 567<br>(510, 631)       | 458<br>(432, 487)       | 395<br>(325, 478)       |
| Montenegro                       | 5.2<br>(4.5, 6.0)    | 4.4<br>(3.9, 5.0)    | 3.6<br>(3.0, 4.3)    | 44<br>(39, 50)          | 35<br>(31, 38)          | 26<br>(22, 31)          |
| Morocco                          | 21.0                 | 16.8                 | 14.0                 | 13754                   | 11743                   | 9562                    |

|                     |              |              |              |                  |                  |                  |
|---------------------|--------------|--------------|--------------|------------------|------------------|------------------|
|                     | (16.3, 27.4) | (13.4, 20.9) | (10.3, 18.8) | (10993, 17236)   | (9655, 14265)    | (7375, 12354)    |
| Mozambique          | 27.8         | 25.5         | 21.7         | 22833            | 25126            | 25096            |
|                     | (21.6, 36.7) | (19.9, 32.8) | (16.8, 27.7) | (18366, 28782)   | (20460, 31260)   | (20130, 31308)   |
| Myanmar             | 20.0         | 16.3         | 14.1         | 23402            | 16639            | 13493            |
|                     | (12.1, 33.7) | (10.3, 25.8) | (8.6, 23.8)  | (15037, 37446)   | (11116, 24999)   | (8783, 20935)    |
| Namibia             | 17.5         | 15.8         | 14.7         | 985              | 1039             | 1050             |
|                     | (10.7, 28.4) | (9.8, 24.7)  | (8.8, 24.0)  | (646, 1500)      | (708, 1525)      | (690, 1602)      |
| Nauru               | 15.0         | 14.4         | 13.1         | 5                | 5                | 4                |
|                     | (8.8, 24.8)  | (8.9, 22.9)  | (7.7, 21.5)  | (3, 8)           | (3, 7)           | (3, 6)           |
| Nepal               | 31.1         | 23.0         | 17.5         | 24153            | 14330            | 9997             |
|                     | (24.1, 40.2) | (18.2, 29.1) | (12.9, 23.9) | (19285, 30180)   | (11710, 17448)   | (7663, 13127)    |
| Netherlands         | 5.2          | 3.0          | 2.3          | 1025             | 542              | 400              |
|                     | (4.9, 5.5)   | (2.8, 3.2)   | (1.9, 2.8)   | (976, 1075)      | (516, 568)       | (337, 477)       |
| New Zealand         | 3.6          | 3.3          | 2.7          | 203              | 211              | 160              |
|                     | (3.2, 4.1)   | (3.0, 3.6)   | (2.1, 3.4)   | (184, 225)       | (196, 227)       | (133, 195)       |
| Nicaragua           | 15.4         | 12.6         | 10.8         | 2142             | 1753             | 1448             |
|                     | (11.3, 20.6) | (9.8, 16.3)  | (7.5, 15.4)  | (1637, 2780)     | (1414, 2168)     | (1048, 1976)     |
| Niger               | 27.3         | 21.9         | 19.6         | 17090            | 18416            | 21283            |
|                     | (18.9, 40.3) | (16.8, 29.2) | (13.5, 28.4) | (12476, 23843)   | (14689, 23432)   | (15558, 29051)   |
| Nigeria             | 27.5         | 23.7         | 22.2         | 149396           | 159399           | 171428           |
|                     | (16.4, 45.2) | (14.9, 37.0) | (13.4, 35.9) | (96254, 230361)  | (107518, 237094) | (112440, 260571) |
| Niue                | 11.1         | 11.1         | 9.4          | 0                | 0                | 0                |
|                     | (6.6, 18.2)  | (6.8, 17.7)  | (5.7, 15.7)  | (0, 1)           | (0, 0)           | (0, 0)           |
| Norway              | 3.7          | 2.9          | 2.4          | 213              | 175              | 146              |
|                     | (3.3, 4.0)   | (2.7, 3.1)   | (2.1, 2.8)   | (197, 230)       | (164, 187)       | (129, 163)       |
| Oman                | 8.0          | 6.2          | 5.6          | 450              | 429              | 509              |
|                     | (6.0, 10.9)  | (5.7, 6.8)   | (5.1, 6.0)   | (352, 582)       | (399, 463)       | (475, 543)       |
| Pakistan            | 39.9         | 36.5         | 30.6         | 204880           | 204648           | 190483           |
|                     | (31.1, 51.7) | (31.5, 42.4) | (24.9, 37.8) | (164694, 256014) | (180187, 232700) | (159505, 228681) |
| Palau               | 10.6         | 9.2          | 7.7          | 3                | 2                | 2                |
|                     | (6.4, 17.5)  | (5.9, 14.7)  | (4.7, 12.7)  | (2, 5)           | (2, 4)           | (1, 3)           |
| Panama              | 11.5         | 9.5          | 7.7          | 827              | 739              | 617              |
|                     | (7.0, 19.2)  | (5.9, 15.0)  | (4.7, 12.7)  | (541, 1272)      | (493, 1084)      | (407, 949)       |
| Papua New Guinea    | 19.3         | 17.6         | 16.1         | 3902             | 3911             | 3850             |
|                     | (11.5, 32.1) | (10.9, 27.8) | (9.6, 26.4)  | (2502, 6078)     | (2629, 5801)     | (2489, 5810)     |
| Paraguay            | 17.1         | 13.4         | 10.5         | 2487             | 1905             | 1526             |
|                     | (12.8, 22.2) | (9.7, 18.1)  | (7.1, 15.4)  | (1972, 3124)     | (1471, 2442)     | (1095, 2123)     |
| Peru                | 13.6         | 9.0          | 7.1          | 8481             | 5433             | 4080             |
|                     | (10.5, 17.8) | (7.8, 10.4)  | (5.5, 8.8)   | (6862, 10614)    | (4796, 6152)     | (3324, 4949)     |
| Philippines         | 14.0         | 12.3         | 10.4         | 32900            | 29338            | 22966            |
|                     | (11.1, 17.9) | (10.0, 15.1) | (7.6, 14.2)  | (26854, 40519)   | (24704, 34843)   | (17614, 29758)   |
| Poland              | 4.3          | 3.0          | 2.3          | 1627             | 1171             | 859              |
|                     | (4.0, 4.5)   | (2.8, 3.1)   | (2.2, 2.5)   | (1555, 1704)     | (1127, 1217)     | (817, 904)       |
| Portugal            | 4.0          | 2.7          | 2.5          | 454              | 256              | 197              |
|                     | (3.7, 4.3)   | (2.5, 2.8)   | (2.3, 2.7)   | (427, 483)       | (241, 271)       | (182, 213)       |
| Qatar               | 6.3          | 6.6          | 5.4          | 75               | 135              | 144              |
|                     | (5.6, 7.2)   | (6.0, 7.2)   | (4.1, 7.3)   | (67, 84)         | (125, 146)       | (114, 185)       |
| Republic of Korea   | 3.1          | 2.1          | 1.7          | 1758             | 945              | 625              |
|                     | (2.3, 4.1)   | (2.0, 2.2)   | (1.5, 1.9)   | (1371, 2233)     | (908, 984)       | (572, 684)       |
| Republic of Moldova | 11.7         | 8.1          | 6.9          | 567              | 369              | 278              |
|                     | (7.9, 17.2)  | (5.4, 12.0)  | (4.3, 10.8)  | (408, 789)       | (266, 515)       | (189, 406)       |
| Northern Macedonia  | 10.8         | 6.2          | 4.1          | 288              | 143              | 91               |
|                     | (9.9, 11.7)  | (5.4, 7.0)   | (3.5, 4.8)   | (266, 309)       | (128, 159)       | (80, 105)        |



|                                  |              |              |              |                |                |                |
|----------------------------------|--------------|--------------|--------------|----------------|----------------|----------------|
| Romania                          | 6.7          | 4.1          | 3.2          | 1464           | 888            | 604            |
|                                  | (5.4, 8.3)   | (3.9, 4.3)   | (2.9, 3.6)   | (1220, 1759)   | (852, 925)     | (553, 659)     |
| Russian Federation               | 6.7          | 4.6          | 3.8          | 8938           | 8190           | 6805           |
|                                  | (6.5, 6.9)   | (4.5, 4.7)   | (3.3, 4.3)   | (8671, 9214)   | (7979, 8410)   | (6060, 7631)   |
| Rwanda                           | 28.7         | 18.9         | 16.9         | 8851           | 6701           | 6798           |
|                                  | (21.0, 39.0) | (17.1, 21.0) | (13.9, 20.5) | (6752, 11679)  | (6159, 7324)   | (5729, 8022)   |
| Saint Kitts and Nevis            | 10.6         | 8.5          | 7.4          | 8              | 6              | 5              |
|                                  | (6.3, 17.9)  | (5.3, 13.6)  | (4.5, 12.4)  | (5, 13)        | (4, 9)         | (3, 8)         |
| Saint Lucia                      | 13.4         | 12.2         | 11.2         | 39             | 28             | 24             |
|                                  | (11.4, 15.9) | (10.5, 14.1) | (9.1, 13.7)  | (34, 46)       | (25, 32)       | (21, 29)       |
| Saint Vincent and the Grenadines | 10.9         | 13.5         | 12.1         | 24             | 24             | 19             |
|                                  | (8.9, 13.2)  | (11.8, 15.4) | (9.5, 15.4)  | (20, 28)       | (21, 27)       | (16, 23)       |
| Samoa                            | 10.8         | 9.7          | 8.8          | 58             | 51             | 42             |
|                                  | (6.3, 18.1)  | (6.1, 15.5)  | (5.2, 14.7)  | (38, 90)       | (35, 76)       | (28, 65)       |
| San Marino                       | 3.3          | 2.1          | 1.8          | 1              | 1              | 0              |
|                                  | (2.0, 5.2)   | (1.4, 3.2)   | (1.1, 2.8)   | (1, 1)         | (0, 1)         | (0, 1)         |
| Sao Tome and Principe            | 16.9         | 14.7         | 12.6         | 98             | 96             | 86             |
|                                  | (10.1, 28.6) | (9.1, 23.9)  | (7.4, 21.0)  | (63, 152)      | (65, 145)      | (56, 133)      |
| Saudi Arabia                     | 9.3          | 6.7          | 5.0          | 5156           | 4102           | 2984           |
|                                  | (5.6, 15.4)  | (4.2, 10.8)  | (3.0, 8.4)   | (3328, 7938)   | (2757, 6094)   | (1947, 4556)   |
| Senegal                          | 25.3         | 22.6         | 19.7         | 10018          | 11270          | 11157          |
|                                  | (19.9, 32.4) | (19.7, 26.0) | (18.4, 21.2) | (8143, 12477)  | (9996, 12720)  | (10484, 11821) |
| Serbia                           | 5.3          | 4.9          | 4.4          | 622            | 458            | 367            |
|                                  | (4.9, 5.7)   | (4.6, 5.2)   | (4.0, 5.0)   | (584, 665)     | (434, 483)     | (331, 406)     |
| Seychelles                       | 9.0          | 9.3          | 9.5          | 14             | 16             | 15             |
|                                  | (7.2, 11.2)  | (7.9, 11.0)  | (7.1, 12.7)  | (12, 17)       | (14, 18)       | (12, 19)       |
| Sierra Leone                     | 34.3         | 27.7         | 23.7         | 7393           | 7073           | 6249           |
|                                  | (20.6, 56.5) | (17.2, 43.9) | (14.4, 39.1) | (4763, 11559)  | (4751, 10672)  | (4072, 9611)   |
| Singapore                        | 3.0          | 2.3          | 2.0          | 149            | 112            | 99             |
|                                  | (2.6, 3.3)   | (2.0, 2.5)   | (1.6, 2.5)   | (136, 164)     | (102, 123)     | (84, 119)      |
| Slovakia                         | 4.0          | 3.3          | 2.8          | 214            | 189            | 157            |
|                                  | (3.6, 4.4)   | (3.1, 3.6)   | (2.5, 3.1)   | (198, 232)     | (177, 201)     | (144, 171)     |
| Slovenia                         | 3.6          | 2.9          | 2.5          | 62             | 61             | 50             |
|                                  | (3.1, 4.1)   | (2.6, 3.2)   | (2.1, 3.1)   | (56, 70)       | (56, 67)       | (43, 59)       |
| Solomon Islands                  | 13.1         | 11.7         | 10.1         | 195            | 214            | 217            |
|                                  | (7.8, 21.9)  | (7.2, 18.8)  | (5.9, 16.8)  | (126, 304)     | (143, 325)     | (140, 339)     |
| Somalia                          | 29.9         | 29.1         | 26.8         | 13377          | 15939          | 17738          |
|                                  | (18.0, 48.7) | (18.0, 45.9) | (16.1, 43.9) | (8653, 20709)  | (10577, 23935) | (11534, 27337) |
| South Africa                     | 20.8         | 17.3         | 16.4         | 21766          | 21016          | 19612          |
|                                  | (16.1, 26.7) | (14.9, 20.0) | (12.7, 21.3) | (17627, 26897) | (18515, 23895) | (15689, 24581) |
| South Sudan                      | 34.2         | 29.9         | 28.8         | 9408           | 11060          | 11515          |
|                                  | (20.8, 56.1) | (18.9, 47.3) | (17.6, 47.2) | (6117, 14678)  | (7460, 16652)  | (7490, 17600)  |
| Spain                            | 3.3          | 2.7          | 2.2          | 1300           | 1334           | 870            |
|                                  | (3.1, 3.4)   | (2.6, 2.8)   | (1.9, 2.7)   | (1242, 1360)   | (1287, 1386)   | (758, 1002)    |
| Sri Lanka                        | 10.3         | 7.4          | 5.8          | 3607           | 2711           | 1943           |
|                                  | (7.8, 13.6)  | (6.5, 8.5)   | (5.4, 6.3)   | (2852, 4561)   | (2422, 3037)   | (1822, 2069)   |
| State of Palestine               | 14.8         | 12.3         | 10.4         | 1811           | 1690           | 1499           |
|                                  | (8.8, 25.1)  | (7.6, 19.2)  | (6.3, 16.9)  | (1163, 2821)   | (1130, 2505)   | (992, 2284)    |
| Sudan                            | 29.6         | 26.0         | 22.6         | 33073          | 32875          | 31584          |
|                                  | (19.0, 46.3) | (17.7, 37.9) | (14.5, 34.7) | (22509, 48255) | (23755, 44929) | (21614, 45513) |
| Suriname                         | 14.4         | 12.9         | 11.2         | 164            | 142            | 120            |
|                                  | (8.6, 24.5)  | (8.1, 20.7)  | (6.8, 18.6)  | (108, 254)     | (96, 209)      | (79, 184)      |
| Sweden                           | 3.7          | 2.9          | 2.4          | 343            | 326            | 293            |
|                                  | (3.4, 4.1)   | (2.7, 3.1)   | (2.1, 2.9)   | (320, 367)     | (309, 345)     | (258, 333)     |
| Switzerland                      | 2.7          | 2.3          | 2.2          | 209            | 180            | 197            |
|                                  | (2.4, 3.1)   | (2.1, 2.5)   | (1.8, 2.7)   | (188, 231)     | (167, 195)     | (166, 234)     |

|                                    |              |              |              |                |                |                |
|------------------------------------|--------------|--------------|--------------|----------------|----------------|----------------|
| Syrian Arab Republic               | 12.7         | 10.7         | 10.9         | 6618           | 6102           | 4649           |
|                                    | (7.7, 21.1)  | (6.8, 17.0)  | (6.7, 17.9)  | (4308, 10208)  | (4206, 9043)   | (3077, 7126)   |
| Tajikistan                         | 13.8         | 10.9         | 9.0          | 2673           | 2623           | 2542           |
|                                    | (8.1, 23.0)  | (6.8, 16.9)  | (5.4, 14.8)  | (1706, 4180)   | (1762, 3865)   | (1651, 3886)   |
| Thailand                           | 10.5         | 7.5          | 5.8          | 9683           | 5965           | 4098           |
|                                    | (6.3, 17.5)  | (4.7, 11.8)  | (3.5, 9.4)   | (6232, 15062)  | (4051, 8807)   | (2723, 6223)   |
| Timor-Leste                        | 20.6         | 15.4         | 13.0         | 751            | 524            | 498            |
|                                    | (12.2, 34.4) | (9.4, 24.2)  | (7.7, 21.6)  | (484, 1178)    | (347, 786)     | (324, 776)     |
| Togo                               | 28.5         | 25.0         | 22.4         | 5739           | 6130           | 6062           |
|                                    | (17.4, 47.4) | (15.6, 40.1) | (13.7, 36.8) | (3775, 9026)   | (4120, 9200)   | (3989, 9299)   |
| Tonga                              | 8.4          | 7.8          | 7.7          | 24             | 22             | 19             |
|                                    | (5.1, 14.1)  | (4.8, 12.7)  | (4.5, 12.8)  | (15, 36)       | (15, 33)       | (13, 30)       |
| Trinidad and Tobago                | 11.9         | 10.4         | 9.1          | 225            | 212            | 161            |
|                                    | (8.7, 16.3)  | (9.3, 11.5)  | (6.8, 12.1)  | (173, 293)     | (194, 231)     | (126, 206)     |
| Tunisia                            | 16.7         | 12.1         | 10.8         | 2855           | 2374           | 2178           |
|                                    | (11.8, 23.7) | (10.1, 14.4) | (9.0, 12.8)  | (2128, 3854)   | (2047, 2750)   | (1868, 2522)   |
| Turkey                             | 12.1         | 6.2          | 4.4          | 16812          | 8097           | 5823           |
|                                    | (9.4, 15.4)  | (5.7, 6.7)   | (4.3, 4.6)   | (13562, 20756) | (7561, 8669)   | (5636, 6020)   |
| Turkmenistan                       | 10.1         | 8.7          | 8.6          | 1089           | 1142           | 1184           |
|                                    | (6.2, 16.6)  | (5.4, 13.7)  | (5.2, 13.9)  | (708, 1653)    | (774, 1677)    | (784, 1788)    |
| Tuvalu                             | 14.8         | 13.6         | 11.9         | 4              | 4              | 3              |
|                                    | (8.9, 24.3)  | (8.6, 22.0)  | (7.1, 19.7)  | (2, 6)         | (3, 6)         | (2, 5)         |
| Uganda                             | 23.3         | 20.8         | 17.8         | 27555          | 30869          | 29928          |
|                                    | (17.9, 30.7) | (17.7, 24.2) | (16.4, 19.4) | (21952, 34678) | (26878, 35280) | (27874, 32240) |
| Ukraine                            | 6.8          | 5.2          | 4.5          | 2761           | 2590           | 1853           |
|                                    | (5.2, 8.9)   | (4.8, 5.6)   | (3.8, 5.4)   | (2179, 3456)   | (2414, 2774)   | (1600, 2140)   |
| United Arab Emirates               | 8.4          | 6.1          | 4.9          | 450            | 579            | 496            |
|                                    | (7.6, 9.4)   | (5.6, 6.6)   | (4.3, 5.7)   | (412, 493)     | (539, 619)     | (441, 559)     |
| United Kingdom                     | 4.4          | 3.8          | 3.0          | 3110           | 3048           | 2358           |
|                                    | (3.8, 5.3)   | (3.6, 4.0)   | (2.6, 3.5)   | (2697, 3588)   | (2932, 3172)   | (2070, 2679)   |
| United Republic of Tanzania        | 25.3         | 21.8         | 18.8         | 36405          | 39826          | 40480          |
|                                    | (20.0, 32.1) | (18.3, 26.2) | (14.4, 24.8) | (29837, 44823) | (34114, 46639) | (32131, 51190) |
| United States                      | 3.3          | 3.0          | 3.0          | 13163          | 12147          | 11844          |
|                                    | (3.2, 3.4)   | (2.9, 3.1)   | (2.6, 3.5)   | (12799, 13548) | (11841, 12460) | (10331, 13555) |
| Uruguay                            | 7.3          | 4.9          | 4.7          | 399            | 236            | 225            |
|                                    | (6.8, 7.9)   | (4.5, 5.3)   | (4.2, 5.4)   | (374, 426)     | (221, 252)     | (203, 251)     |
| Uzbekistan                         | 11.2         | 8.9          | 6.5          | 6357           | 5840           | 4535           |
|                                    | (6.7, 18.3)  | (5.7, 13.9)  | (4.0, 10.7)  | (4121, 9734)   | (3942, 8589)   | (2988, 6864)   |
| Vanuatu                            | 12.2         | 11.9         | 11.1         | 77             | 92             | 98             |
|                                    | (7.1, 20.0)  | (7.5, 18.8)  | (6.8, 18.2)  | (49, 120)      | (62, 138)      | (65, 151)      |
| Venezuela (Bolivarian Republic of) | 9.8          | 8.8          | 9.4          | 5699           | 5263           | 4865           |
|                                    | (5.6, 16.7)  | (5.5, 14.4)  | (5.7, 15.4)  | (3641, 8991)   | (3544, 8006)   | (3212, 7516)   |
| Viet Nam                           | 13.3         | 9.6          | 7.8          | 18734          | 14783          | 12479          |
|                                    | (8.7, 20.2)  | (6.9, 13.7)  | (5.2, 11.9)  | (13043, 27224) | (11086, 19820) | (8850, 17746)  |
| Yemen                              | 26.6         | 22.0         | 23.7         | 18890          | 18041          | 21184          |
|                                    | (18.1, 38.9) | (17.2, 28.5) | (17.1, 32.9) | (13620, 26397) | (14573, 22554) | (16010, 27950) |
| Zambia                             | 20.7         | 17.3         | 14.8         | 9952           | 9930           | 9597           |
|                                    | (15.1, 28.4) | (14.8, 20.3) | (11.8, 18.4) | (7622, 13076)  | (8687, 11347)  | (7920, 11652)  |
| Zimbabwe                           | 22.8         | 23.7         | 16.0         | 8787           | 11335          | 7113           |
|                                    | (16.4, 31.9) | (20.1, 28.0) | (14.9, 17.2) | (6570, 11748)  | (9818, 13060)  | (6687, 7548)   |

Table A7: Share of stillbirths, percentage decrease, annual rate of change in stillbirth rate, neonatal mortality rate and mortality rate among children aged 1–59 months, and ratio of stillbirth to neonatal mortality rate, by country or territory

Note: Numbers in brackets are 90 per cent uncertainty intervals.

Significant percentage decrease based on the lower bound of the 90 per cent uncertainty intervals: \*\*\*>=50%, \*\*>=25%<50%, \*>=10%<25%, >=0%<10%, †No significant decrease

| Country/territory     | Share of total stillbirths worldwide, 2019 | Percentage decrease 2000 to 2019 |                         |                                                | Annual rate of reduction 2000 to 2019 |                         |                                                | Ratio of stillbirth rate to neonatal mortality rate, 2019 |
|-----------------------|--------------------------------------------|----------------------------------|-------------------------|------------------------------------------------|---------------------------------------|-------------------------|------------------------------------------------|-----------------------------------------------------------|
|                       |                                            | stillbirth rate                  | neonatal mortality rate | mortality rate among children aged 1–59 months | stillbirth rate                       | neonatal mortality rate | mortality rate among children aged 1–59 months |                                                           |
| Afghanistan†          | 1.80<br>(1.11, 2.69)                       | 23.2<br>(-9.3, 46.2)             | 40.8<br>(24.3, 55.0)    | 65.1<br>(55.1, 73.8)                           | 1.4<br>(-0.5, 3.3)                    | 2.8<br>(1.5, 4.2)       | 5.5<br>(4.2, 7)                                | 0.8<br>(0.5, 1.3)                                         |
| Albania**             | 0.01<br>(0.01, 0.01)                       | 36.0<br>(11.9, 53.6)             | 38.3<br>(22.7, 49.7)    | 85.7<br>(81.6, 88.9)                           | 2.3<br>(0.7, 4.0)                     | 2.5<br>(1.4, 3.6)       | 10.2<br>(8.9, 11.6)                            | 0.5<br>(0.4, 0.7)                                         |
| Algeria***            | 0.49<br>(0.39, 0.57)                       | 44.9<br>(32, 55.9)               | 22.6<br>(13.5, 30.0)    | 62.7<br>(57.6, 67.1)                           | 3.1<br>(2.0, 4.3)                     | 1.4<br>(0.8, 1.9)       | 5.2<br>(4.5, 5.8)                              | 0.6<br>(0.5, 0.7)                                         |
| Andorra**             | 0.00<br>(0.00, 0.00)                       | 41.2<br>(16.7, 58.4)             | 63.5<br>(-85.7, 92.4)   | 58.9<br>(-102.1, 91.6)                         | 2.8<br>(1.0, 4.6)                     | 5.3<br>(-3.3, 13.6)     | 4.7<br>(-3.7, 13)                              | 1.5<br>(0.4, 6.1)                                         |
| Angola*               | 1.32<br>(0.84, 1.94)                       | 34.0<br>(5.9, 53.4)              | 45.2<br>(-9.7, 76.6)    | 70.0<br>(42.2, 87.0)                           | 2.2<br>(0.3, 4.0)                     | 3.2<br>(-0.5, 7.6)      | 6.3<br>(2.9, 10.8)                             | 0.7<br>(0.3, 1.8)                                         |
| Antigua and Barbuda** | 0.00<br>(0.00, 0.00)                       | 37.9<br>(11.9, 57.1)             | 62.1<br>(43.1, 75.2)    | 49.5<br>(20.6, 68.0)                           | 2.5<br>(0.7, 4.5)                     | 5.1<br>(3.0, 7.3)       | 3.6<br>(1.2, 6)                                | 1.5<br>(0.8, 2.4)                                         |
| Argentina***          | 0.21<br>(0.18, 0.22)                       | 31.8<br>(26.1, 37)               | 44.4<br>(40.5, 47.9)    | 63.6<br>(60.3, 66.7)                           | 2.0<br>(1.6, 2.4)                     | 3.1<br>(2.7, 3.4)       | 5.3<br>(4.9, 5.8)                              | 0.9<br>(0.8, 1.0)                                         |
| Armenia**             | 0.03<br>(0.02, 0.03)                       | 37.7<br>(15.8, 53.8)             | 61.1<br>(44.0, 74.0)    | 62.5<br>(45.7, 76.2)                           | 2.5<br>(0.9, 4.1)                     | 5.0<br>(3.1, 7.1)       | 5.2<br>(3.2, 7.6)                              | 2.0<br>(1.4, 3.0)                                         |
| Australia**           | 0.04<br>(0.03, 0.04)                       | 31.0<br>(19.4, 40.9)             | 35.4<br>(30.5, 39.8)    | 50.3<br>(45.8, 54.7)                           | 1.9<br>(1.1, 2.8)                     | 2.3<br>(1.9, 2.7)       | 3.7<br>(3.2, 4.2)                              | 1.0<br>(0.8, 1.2)                                         |
| Austria**             | 0.01<br>(0.01, 0.01)                       | 22.1<br>(10.8, 31.9)             | 33.2<br>(20.3, 44.0)    | 41.7<br>(29.0, 51.8)                           | 1.3<br>(0.6, 2.0)                     | 2.1<br>(1.2, 3.0)       | 2.8<br>(1.8, 3.8)                              | 1.1<br>(0.9, 1.3)                                         |
| Azerbaijan***         | 0.07<br>(0.05, 0.10)                       | 53.2<br>(33.7, 67.4)             | 67.5<br>(45.2, 81.5)    | 77.3<br>(60.5, 87.1)                           | 4.0<br>(2.2, 5.9)                     | 5.9<br>(3.2, 8.9)       | 7.8<br>(4.9, 10.8)                             | 0.8<br>(0.5, 1.6)                                         |
| Bahamas†              | 0.00<br>(0.00, 0.00)                       | 7.1<br>(-11.8, 22.6)             | 16.5<br>(-13.1, 39.0)   | 28.6<br>(2.9, 48.8)                            | 0.4<br>(-0.6, 1.4)                    | 0.9<br>(-0.7, 2.6)      | 1.8<br>(0.2, 3.5)                              | 1.7<br>(1.2, 2.4)                                         |
| Bahrain**             | 0.01<br>(0.01, 0.01)                       | 30.7<br>(14, 44.5)               | 38.1<br>(15.3, 54.5)    | 48.9<br>(32.9, 61.5)                           | 1.9<br>(0.8, 3.1)                     | 2.5<br>(0.9, 4.1)       | 3.5<br>(2.1, 5)                                | 2.0<br>(1.4, 2.7)                                         |
| Bangladesh***         | 3.69<br>(2.96, 4.22)                       | 41.3<br>(26, 53.6)               | 55.4<br>(49.4, 60.7)    | 73.9<br>(69.9, 77.4)                           | 2.8<br>(1.6, 4.0)                     | 4.3<br>(3.6, 4.9)       | 7.1<br>(6.3, 7.8)                              | 1.3<br>(1.0, 1.6)                                         |
| Barbados†             | 0.00<br>(0.00, 0.00)                       | 12.0<br>(-26.4, 38.7)            | 9.7<br>(-31.3, 38.0)    | 26.8<br>(-12.5, 54.1)                          | 0.7<br>(-1.2, 2.6)                    | 0.5<br>(-1.4, 2.5)      | 1.6<br>(-0.6, 4.1)                             | 0.9<br>(0.5, 1.4)                                         |
| Belarus***            | 0.01<br>(0.01, 0.01)                       | 59.6<br>(48.8, 68)               | 79.9<br>(75.2, 83.8)    | 70.1<br>(64.9, 74.7)                           | 4.8<br>(3.5, 6)                       | 8.4<br>(7.3, 9.6)       | 6.4<br>(5.5, 7.2)                              | 1.7<br>(1.3, 2.2)                                         |

|                                          |                      |                        |                         |                       |                      |                     |                     |                   |
|------------------------------------------|----------------------|------------------------|-------------------------|-----------------------|----------------------|---------------------|---------------------|-------------------|
| Belgium*                                 | 0.02<br>(0.01, 0.02) | 16.2<br>(1.6, 29.1)    | 32.1<br>(17.2, 44.4)    | 50.9<br>(39.4, 61.4)  | 0.9<br>(0.1, 1.8)    | 2.0<br>(1.0, 3.1)   | 3.7<br>(2.6, 5.0)   | 1.4<br>(1.1, 1.8) |
| Belize**                                 | 0.00<br>(0.00, 0.00) | 41.8<br>(22.6, 56.1)   | 32.4<br>(17.4, 44.1)    | 64.1<br>(54.9, 71.7)  | 2.9<br>(1.3, 4.3)    | 2.1<br>(1.0, 3.1)   | 5.4<br>(4.2, 6.6)   | 0.8<br>(0.6, 1.0) |
| Benin†                                   | 0.45<br>(0.37, 0.51) | 25.2<br>(-0.1, 44.7)   | 22.7<br>(7.8, 35.9)     | 40.4<br>(30.9, 49.2)  | 1.5<br>(0, 3.1)      | 1.4<br>(0.4, 2.3)   | 2.7<br>(1.9, 3.6)   | 0.7<br>(0.5, 0.8) |
| Bhutan**                                 | 0.01<br>(0.00, 0.01) | 40.9<br>(16.2, 58.1)   | 47.7<br>(11.9, 69.8)    | 74.2<br>(56.7, 87.0)  | 2.8<br>(0.9, 4.6)    | 3.4<br>(0.7, 6.3)   | 7.1<br>(4.4, 10.7)  | 0.6<br>(0.3, 1.0) |
| Bolivia<br>(Plurinational<br>State of)** | 0.11<br>(0.08, 0.15) | 42.7<br>(17.9, 59.9)   | 49.9<br>(30.5, 64.0)    | 75.8<br>(66.6, 82.9)  | 2.9<br>(1.0, 4.8)    | 3.6<br>(1.9, 5.4)   | 7.5<br>(5.8, 9.3)   | 0.6<br>(0.4, 1.0) |
| Bosnia and<br>Herzegovina**              | 0.00<br>(0.00, 0.00) | 30.5<br>(12.3, 44.9)   | 38.6<br>(25.9, 49.7)    | 46.0<br>(29.4, 59.1)  | 1.9<br>(0.7, 3.1)    | 2.6<br>(1.6, 3.6)   | 3.2<br>(1.8, 4.7)   | 0.7<br>(0.5, 0.8) |
| Botswana†                                | 0.04<br>(0.04, 0.05) | -29.2<br>(-52.1, -9.2) | -209.8<br>(-636.2, 0.7) | 62.3<br>(13.0, 88.5)  | -1.3<br>(-2.2, -0.5) | -6.0<br>(-10.5, 0)  | 5.1<br>(0.7, 11.4)  | 0.8<br>(0.3, 2.5) |
| Brazil*                                  | 1.11<br>(0.88, 1.28) | 24.9<br>(8.7, 38.4)    | 56.2<br>(44.4, 65.4)    | 63.9<br>(54.3, 72.1)  | 1.5<br>(0.5, 2.6)    | 4.4<br>(3.1, 5.6)   | 5.4<br>(4.1, 6.7)   | 1.0<br>(0.7, 1.2) |
| Brunei<br>Darussalam†                    | 0.00<br>(0.00, 0.00) | 9.4<br>(-14, 28.1)     | -21.0<br>(-46.4, -0.3)  | -1.0<br>(-22.2, 16.7) | 0.5<br>(-0.7, 1.7)   | -1.0<br>(-2.0, 0.0) | -0.1<br>(-1.1, 1.0) | 0.8<br>(0.6, 1.0) |
| Bulgaria***                              | 0.02<br>(0.01, 0.02) | 34.0<br>(27.7, 39.8)   | 57.5<br>(53.5, 61.2)    | 64.7<br>(61.4, 67.7)  | 2.2<br>(1.7, 2.7)    | 4.5<br>(4.0, 5)     | 5.5<br>(5.0, 5.9)   | 1.5<br>(1.4, 1.8) |
| Burkina Faso**                           | 0.77<br>(0.67, 0.82) | 34.4<br>(13, 50.8)     | 36.5<br>(4.1, 59.2)     | 56.1<br>(38.4, 68.7)  | 2.2<br>(0.7, 3.7)    | 2.4<br>(0.2, 4.7)   | 4.3<br>(2.5, 6.1)   | 0.8<br>(0.5, 1.2) |
| Burundi†                                 | 0.60<br>(0.53, 0.63) | 14.2<br>(-14.3, 35.4)  | 43.2<br>(10.8, 63.8)    | 70.5<br>(54.7, 81.1)  | 0.8<br>(-0.7, 2.3)   | 3.0<br>(0.6, 5.3)   | 6.4<br>(4.2, 8.8)   | 1.2<br>(0.8, 1.9) |
| Cabo Verde*                              | 0.01<br>(0.00, 0.01) | 30.6<br>(1.3, 51)      | 48.9<br>(33.5, 60.7)    | 71.6<br>(62.0, 79.2)  | 1.9<br>(0.1, 3.7)    | 3.5<br>(2.1, 4.9)   | 6.6<br>(5.1, 8.3)   | 1.2<br>(0.8, 2.1) |
| Cambodia***                              | 0.23<br>(0.15, 0.35) | 51.2<br>(28.9, 66.6)   | 58.9<br>(19.7, 78.8)    | 83.3<br>(67.6, 91.7)  | 3.8<br>(1.8, 5.8)    | 4.7<br>(1.2, 8.2)   | 9.4<br>(5.9, 13.1)  | 0.9<br>(0.4, 1.8) |
| Cameroon†                                | 0.91<br>(0.57, 1.32) | 19.0<br>(-14.6, 43.2)  | 25.9<br>(4.4, 42.7)     | 55.4<br>(45.5, 64.1)  | 1.1<br>(-0.7, 3.0)   | 1.6<br>(0.2, 2.9)   | 4.2<br>(3.2, 5.4)   | 0.7<br>(0.5, 1.2) |
| Canada*                                  | 0.05<br>(0.05, 0.06) | 14.2<br>(5.6, 21.9)    | 10.9<br>(3.1, 18.1)     | 38.3<br>(31.0, 45.5)  | 0.8<br>(0.3, 1.3)    | 0.6<br>(0.2, 1.1)   | 2.5<br>(1.9, 3.2)   | 0.8<br>(0.7, 0.9) |
| Central African<br>Republic†             | 0.26<br>(0.17, 0.38) | 12.3<br>(-25.2, 37.9)  | 19.6<br>(-40.5, 53.8)   | 42.2<br>(-0.6, 66.9)  | 0.7<br>(-1.2, 2.5)   | 1.1<br>(-1.8, 4.1)  | 2.9<br>(0, 5.8)     | 0.8<br>(0.4, 1.6) |
| Chad†                                    | 0.96<br>(0.6, 1.39)  | 20.9<br>(-12.3, 44.7)  | 25.0<br>(-6.6, 47.6)    | 43.4<br>(24.2, 58.3)  | 1.2<br>(-0.6, 3.1)   | 1.5<br>(-0.3, 3.4)  | 3.0<br>(1.5, 4.6)   | 0.8<br>(0.5, 1.4) |
| Chile*                                   | 0.04<br>(0.03, 0.04) | 25.8<br>(4.5, 42)      | 20.2<br>(-7.1, 40.6)    | 53.4<br>(35.2, 68.4)  | 1.6<br>(0.2, 2.9)    | 1.2<br>(-0.4, 2.7)  | 4.0<br>(2.3, 6.1)   | 0.7<br>(0.5, 0.9) |
| China****                                | 4.69<br>(3.99, 5.09) | 63.2<br>(56.9, 68.3)   | 81.6<br>(77.7, 84.9)    | 74.8<br>(69.2, 79.5)  | 5.3<br>(4.4, 6)      | 8.9<br>(7.9, 10)    | 7.3<br>(6.2, 8.3)   | 1.4<br>(1.2, 1.8) |
| Colombia†                                | 0.27                 | 25.7                   | 44.5                    | 45.4                  | 1.6                  | 3.1                 | 3.2                 | 0.9               |

|                                         |              |               |                 |                 |             |              |              |            |
|-----------------------------------------|--------------|---------------|-----------------|-----------------|-------------|--------------|--------------|------------|
|                                         | (0.2, 0.34)  | (-2.9, 45.6)  | (19.9, 61.8)    | (21.3, 62.9)    | (-0.2, 3.2) | (1.2, 5.1)   | (1.3, 5.2)   | (0.6, 1.6) |
| Comoros†                                | 0.03         | 18.9          | 26.6            | 45.2            | 1.1         | 1.6          | 3.2          | 0.8        |
|                                         | (0.02, 0.05) | (-15.1, 42.6) | (-68.1, 68.3)   | (-27.2, 76.4)   | (-0.7, 2.9) | (-2.7, 6)    | (-1.3, 7.6)  | (0.3, 2.5) |
| Congo†                                  | 0.14         | 26.9          | 37.0            | 66.2            | 1.6         | 2.4          | 5.7          | 0.8        |
|                                         | (0.09, 0.2)  | (-4.5, 48.5)  | (-12.9, 64.3)   | (40.3, 80.7)    | (-0.2, 3.5) | (-0.6, 5.4)  | (2.7, 8.6)   | (0.4, 1.6) |
| Cook Islands**                          | 0.00         | 46.0          | 58.8            | 56.5            | 3.2         | 4.7          | 4.4          | 1.3        |
|                                         | (0.00, 0.00) | (24.6, 61.4)  | (26.0, 76.5)    | (7.7, 91.3)     | (1.5, 5)    | (1.6, 7.6)   | (0.4, 10.4)  | (0.6, 2.7) |
| Costa Rica†                             | 0.02         | 7.7           | 19.8            | 54.3            | 0.4         | 1.2          | 4.1          | 0.7        |
|                                         | (0.01, 0.02) | (-8.9, 21.8)  | (14.0, 25.2)    | (49.4, 58.7)    | (-0.4, 1.3) | (0.8, 1.5)   | (3.6, 4.7)   | (0.6, 0.8) |
| Cote d'Ivoire†                          | 1.11         | 23.0          | 26.8            | 53.0            | 1.4         | 1.6          | 4.0          | 0.7        |
|                                         | (0.69, 1.63) | (-9.2, 45.6)  | (4.9, 44.7)     | (39.3, 63.6)    | (-0.5, 3.2) | (0.3, 3.1)   | (2.6, 5.3)   | (0.4, 1.2) |
| Croatia***                              | 0.01         | 41.9          | 47.8            | 32.0            | 2.9         | 3.4          | 2.0          | 1.0        |
|                                         | (0.00, 0.01) | (32.5, 49.8)  | (39.1, 55.6)    | (15.3, 45.2)    | (2.1, 3.6)  | (2.6, 4.3)   | (0.9, 3.2)   | (0.8, 1.2) |
| Cuba***                                 | 0.04         | 36.8          | 49.2            | 34.5            | 2.4         | 3.6          | 2.2          | 3.2        |
|                                         | (0.04, 0.04) | (32.3, 41)    | (36.7, 58.1)    | (18.7, 46.0)    | (2.1, 2.8)  | (2.4, 4.6)   | (1.1, 3.2)   | (2.6, 3.7) |
| Cyprus**                                | 0.00         | 42.5          | 63.8            | 66.6            | 2.9         | 5.4          | 5.8          | 1.9        |
|                                         | (0.00, 0.00) | (19.7, 59.3)  | (43.7, 76.2)    | (45.9, 79.4)    | (1.2, 4.7)  | (3.0, 7.5)   | (3.2, 8.3)   | (1.2, 2.9) |
| Czechia†                                | 0.01         | 6.9           | 39.7            | 44.3            | 0.4         | 2.7          | 3.1          | 1.6        |
|                                         | (0.01, 0.02) | (-2.9, 15.8)  | (32.9, 45.9)    | (37.8, 50.0)    | (-0.2, 0.9) | (2.1, 3.2)   | (2.5, 3.7)   | (1.4, 2.0) |
| Democratic People's Republic of Korea** | 0.15         | 38.0          | 63.9            | 77.2            | 2.5         | 5.4          | 7.8          | 0.9        |
|                                         | (0.10, 0.22) | (12.2, 56.4)  | (54.3, 72.4)    | (70.7, 84.1)    | (0.7, 4.4)  | (4.1, 6.8)   | (6.5, 9.7)   | (0.5, 1.7) |
| Democratic Republic of the Congo†       | 5.03         | 19.4          | 28.8            | 53.1            | 1.1         | 1.8          | 4.0          | 1.0        |
|                                         | (3.96, 5.90) | (-12.8, 42.6) | (-14.6, 57.8)   | (27.2, 71.0)    | (-0.6, 2.9) | (-0.7, 4.5)  | (1.7, 6.5)   | (0.6, 1.7) |
| Denmark**                               | 0.01         | 35.9          | 14.1            | 65.3            | 2.3         | 0.8          | 5.6          | 0.7        |
|                                         | (0.01, 0.01) | (21.9, 47.6)  | (0.1, 29.9)     | (42.2, 81.5)    | (1.3, 3.4)  | (0, 1.9)     | (2.9, 8.9)   | (0.6, 0.9) |
| Djibouti†                               | 0.03         | 20.2          | 30.6            | 53.5            | 1.2         | 1.9          | 4.0          | 0.9        |
|                                         | (0.02, 0.04) | (-13.9, 43.5) | (-21.0, 61.6)   | (20.0, 76.0)    | (-0.7, 3.0) | (-1, 5)      | (1.2, 7.5)   | (0.5, 1.7) |
| Dominica†                               | 0.00         | -19.4         | -118.2          | -63.5           | -0.9        | -4.1         | -2.6         | 0.5        |
|                                         | (0.00, 0.00) | (-72.3, 16.3) | (-162.8, -80.6) | (-199.7, -42.6) | (-2.9, 0.9) | (-5.1, -3.1) | (-5.8, -1.9) | (0.4, 0.9) |
| Dominican Republic†                     | 0.11         | 25.7          | 17.2            | 50.4            | 1.6         | 1.0          | 3.7          | 0.6        |
|                                         | (0.07, 0.17) | (-5.9, 48.7)  | (-24.3, 44.4)   | (19.7, 69.4)    | (-0.3, 3.5) | (-1.1, 3.1)  | (1.2, 6.2)   | (0.4, 1.2) |
| Ecuador**                               | 0.15         | 44.5          | 51.2            | 52.3            | 3.1         | 3.8          | 3.9          | 1.2        |
|                                         | (0.11, 0.2)  | (22.7, 59.6)  | (40.4, 60.1)    | (41.6, 61.0)    | (1.4, 4.8)  | (2.7, 4.8)   | (2.8, 5)     | (0.9, 1.8) |
| Egypt**                                 | 1.20         | 48.3          | 50.1            | 62.9            | 3.5         | 3.7          | 5.2          | 0.8        |
|                                         | (0.76, 1.81) | (24.6, 64.2)  | (26.9, 65.7)    | (45.5, 74.6)    | (1.5, 5.4)  | (1.6, 5.6)   | (3.2, 7.2)   | (0.5, 1.6) |
| El Salvador***                          | 0.06         | 49.7          | 55.6            | 62.9            | 3.6         | 4.3          | 5.2          | 1.5        |
|                                         | (0.04, 0.08) | (30.4, 64.2)  | (25.5, 72.8)    | (40.0, 78.3)    | (1.9, 5.4)  | (1.5, 6.9)   | (2.7, 8)     | (0.8, 2.8) |
| Equatorial Guinea†                      | 0.03         | 16.4          | 34.7            | 53.5            | 0.9         | 2.2          | 4.0          | 0.5        |
|                                         | (0.02, 0.05) | (-17.8, 41.4) | (-20.3, 67.1)   | (20.2, 74.2)    | (-0.9, 2.8) | (-1, 5.9)    | (1.2, 7.1)   | (0.2, 1.2) |
| Eritrea†                                | 0.10         | 21.3          | 32.8            | 61.8            | 1.3         | 2.1          | 5.1          | 1.0        |

|                |              |               |               |              |             |              |             |            |
|----------------|--------------|---------------|---------------|--------------|-------------|--------------|-------------|------------|
|                | (0.06, 0.14) | (-11.7, 45.1) | (-15.8, 61.1) | (34.4, 78.1) | (-0.6, 3.2) | (-0.8, 5)    | (2.2, 8)    | (0.5, 2.0) |
| Estonia***     | 0.00         | 53.5          | 79.9          | 76.5         | 4.0         | 8.5          | 7.6         | 2.0        |
|                | (0.00, 0.00) | (44.1, 61.2)  | (74.8, 84.0)  | (70.7, 81.0) | (3.1, 5)    | (7.2, 9.7)   | (6.5, 8.7)  | (1.7, 2.8) |
| Eswatini†      | 0.02         | 15.6          | 14.5          | 65.0         | 0.9         | 0.8          | 5.5         | 0.7        |
|                | (0.01, 0.03) | (-18.6, 39.7) | (-39.0, 48.2) | (45.4, 77.8) | (-0.9, 2.7) | (-1.7, 3.5)  | (3.2, 7.9)  | (0.4, 1.3) |
| Ethiopia*      | 4.60         | 31.2          | 42.7          | 75.4         | 2.0         | 2.9          | 7.4         | 0.9        |
|                | (2.92, 6.66) | (2.3, 52.2)   | (27.6, 54.5)  | (69.2, 80.8) | (0.1, 3.9)  | (1.7, 4.1)   | (6.2, 8.7)  | (0.6, 1.4) |
| Fiji†          | 0.01         | 15.9          | -19.1         | -9.5         | 0.9         | -0.9         | -0.5        | 0.8        |
|                | (0.01, 0.01) | (-10.5, 35.7) | (-45.7, 3.3)  | (-29.4, 8.2) | (-0.5, 2.3) | (-2, 0.2)    | (-1.4, 0.4) | (0.6, 1.0) |
| Finland**      | 0.01         | 23.9          | 43.6          | 45.3         | 1.4         | 3.0          | 3.2         | 1.5        |
|                | (0.00, 0.01) | (11.7, 34.6)  | (35.1, 50.7)  | (35.8, 53.6) | (0.7, 2.2)  | (2.3, 3.7)   | (2.3, 4.0)  | (1.1, 1.6) |
| France†        | 0.16         | 13.2          | 3.4           | 31.3         | 0.7         | 0.2          | 2.0         | 1.6        |
|                | (0.13, 0.18) | (-2.2, 26.5)  | (-5.3, 11.1)  | (24.3, 38.1) | (-0.1, 1.6) | (-0.3, 0.6)  | (1.5, 2.5)  | (1.3, 1.9) |
| Gabon†         | 0.05         | 21.4          | 28.9          | 60.3         | 1.3         | 1.8          | 4.9         | 0.7        |
|                | (0.03, 0.07) | (-11.1, 45.1) | (-19.7, 58.2) | (34.5, 77.0) | (-0.6, 3.2) | (-0.9, 4.6)  | (2.2, 7.7)  | (0.4, 1.3) |
| Gambia†        | 0.10         | 19.4          | 27.9          | 67.5         | 1.1         | 1.7          | 5.9         | 0.8        |
|                | (0.07, 0.14) | (-15.1, 43.3) | (3.5, 44.8)   | (58.7, 75.1) | (-0.7, 3.0) | (0.2, 3.1)   | (4.7, 7.3)  | (0.5, 1.2) |
| Georgia****    | 0.02         | 62.3          | 78.2          | 67.4         | 5.1         | 8.0          | 5.9         | 1.2        |
|                | (0.01, 0.02) | (53.4, 69.8)  | (72.8, 82.6)  | (58.6, 74.6) | (4.0, 6.3)  | (6.8, 9.2)   | (4.6, 7.2)  | (1.0, 1.4) |
| Germany†       | 0.11         | 7.9           | 17.9          | 40.7         | 0.4         | 1.0          | 2.8         | 1.2        |
|                | (0.09, 0.12) | (-9.1, 21.4)  | (12.2, 23.3)  | (35.8, 45.7) | (-0.5, 1.3) | (0.7, 1.4)   | (2.3, 3.2)  | (1.0, 1.4) |
| Ghana†         | 0.99         | 24.5          | 36.0          | 64.1         | 1.5         | 2.3          | 5.4         | 0.9        |
|                | (0.75, 1.21) | (-2.2, 43.9)  | (18.3, 49.8)  | (54.6, 71.9) | (-0.1, 3.0) | (1.1, 3.6)   | (4.2, 6.7)  | (0.7, 1.3) |
| Greece**       | 0.01         | 32.0          | 42.5          | 40.1         | 2.0         | 2.9          | 2.7         | 1.4        |
|                | (0.01, 0.01) | (23.5, 39.7)  | (33.3, 50.8)  | (29.0, 50.0) | (1.4, 2.7)  | (2.1, 3.7)   | (1.8, 3.6)  | (1.2, 1.8) |
| Grenada†       | 0.00         | 3.8           | -37.0         | 25.6         | 0.2         | -1.7         | 1.6         | 0.9        |
|                | (0.00, 0.00) | (-36.3, 34.1) | (-79.6, -4.0) | (-1.5, 46.5) | (-1.6, 2.2) | (-3.1, -0.2) | (-0.1, 3.3) | (0.5, 1.4) |
| Guatemala**    | 0.28         | 36.0          | 42.5          | 60.2         | 2.3         | 2.9          | 4.8         | 1.0        |
|                | (0.22, 0.33) | (16.8, 50.5)  | (24.6, 56.8)  | (47.7, 70.2) | (1.0, 3.7)  | (1.5, 4.4)   | (3.4, 6.4)  | (0.8, 1.5) |
| Guinea†        | 0.61         | 18.5          | 33.3          | 43.3         | 1.1         | 2.1          | 3.0         | 0.8        |
|                | (0.38, 0.88) | (-14.9, 43.2) | (11.2, 50.3)  | (30.4, 53.9) | (-0.7, 3.0) | (0.6, 3.7)   | (1.9, 4.1)  | (0.5, 1.3) |
| Guinea-Bissau* | 0.11         | 28.2          | 35.9          | 64.1         | 1.7         | 2.3          | 5.4         | 0.9        |
|                | (0.08, 0.15) | (0.5, 48.4)   | (-3.4, 61.9)  | (44.1, 78.5) | (0, 3.5)    | (-0.2, 5.1)  | (3.1, 8.1)  | (0.5, 1.7) |
| Guyana†        | 0.01         | 23.7          | 30.4          | 46.1         | 1.4         | 1.9          | 3.3         | 0.7        |
|                | (0.01, 0.02) | (-8.7, 46.4)  | (-15.8, 58.2) | (5.3, 70.2)  | (-0.4, 3.3) | (-0.8, 4.6)  | (0.3, 6.4)  | (0.4, 1.4) |
| Haiti†         | 0.28         | 16.6          | 14.9          | 49.5         | 1.0         | 0.9          | 3.6         | 0.8        |
|                | (0.17, 0.41) | (-17.5, 41.2) | (-24.3, 41.7) | (29.3, 63.5) | (-0.8, 2.8) | (-1.1, 2.8)  | (1.8, 5.3)  | (0.4, 1.4) |
| Honduras**     | 0.09         | 38.7          | 47.2          | 61.4         | 2.6         | 3.4          | 5.0         | 0.9        |
|                | (0.07, 0.10) | (20.4, 53.4)  | (17.4, 66.2)  | (40.2, 76.6) | (1.2, 4.0)  | (1.0, 5.7)   | (2.7, 7.6)  | (0.6, 1.5) |
| Hungary*       | 0.02         | 23.2          | 65.4          | 62.1         | 1.4         | 5.6          | 5.1         | 1.7        |
|                | (0.01, 0.02) | (8.1, 36.2)   | (59.5, 70.3)  | (55.4, 67.9) | (0.4, 2.4)  | (4.8, 6.4)   | (4.2, 6)    | (1.3, 2.1) |
| Iceland*       | 0.00         | 29.4          | 51.5          | 50.7         | 1.8         | 3.8          | 3.7         | 1.9        |
|                | (0.00, 0.00) | (7.6, 46.2)   | (30.5, 66.2)  | (29.5, 66.1) | (0.4, 3.3)  | (1.9, 5.7)   | (1.8, 5.7)  | (1.2, 2.5) |
| India***       | 17.33        | 53.0          | 51.9          | 73.7         | 4.0         | 3.8          | 7.0         | 0.6        |

|                                   |               |               |               |               |             |             |             |            |
|-----------------------------------|---------------|---------------|---------------|---------------|-------------|-------------|-------------|------------|
|                                   | (16.4, 22.36) | (28.2, 59.9)  | (45.2, 58.0)  | (69.7, 77.3)  | (1.7, 4.8)  | (3.2, 4.6)  | (6.3, 7.8)  | (0.5, 0.7) |
| Indonesia**                       | 2.33          | 37.8          | 45.5          | 61.4          | 2.5         | 3.2         | 5.0         | 0.8        |
|                                   | (1.73, 2.87)  | (15.6, 54.8)  | (33.0, 55.1)  | (52.5, 68.4)  | (0.9, 4.2)  | (2.1, 4.2)  | (3.9, 6.1)  | (0.6, 1.0) |
| Iran (Islamic Republic of)**      | 0.53          | 40.2          | 54.3          | 65.9          | 2.7         | 4.1         | 5.7         | 0.8        |
|                                   | (0.33, 0.79)  | (15.1, 58.2)  | (16.5, 74.9)  | (35.9, 86.0)  | (0.9, 4.6)  | (0.9, 7.3)  | (2.3, 10.3) | (0.4, 1.8) |
| Iraq†                             | 0.68          | 28.8          | 35.1          | 48.6          | 1.8         | 2.3         | 3.5         | 0.8        |
|                                   | (0.42, 1.00)  | (-2.1, 50.6)  | (14.5, 51.5)  | (30.6, 62.6)  | (-0.1, 3.7) | (0.8, 3.8)  | (1.9, 5.2)  | (0.5, 1.4) |
| Ireland***                        | 0.01          | 42.9          | 47.6          | 62.6          | 2.9         | 3.4         | 5.2         | 1.3        |
|                                   | (0.01, 0.01)  | (33.2, 51.4)  | (37.0, 56.8)  | (53.4, 70.7)  | (2.1, 3.8)  | (2.4, 4.4)  | (4.0, 6.5)  | (1.1, 1.7) |
| Israel**                          | 0.02          | 33.0          | 46.1          | 47.4          | 2.1         | 3.2         | 3.4         | 1.4        |
|                                   | (0.02, 0.03)  | (20.4, 43.5)  | (41.5, 50.3)  | (42.7, 51.7)  | (1.2, 3.0)  | (2.8, 3.7)  | (2.9, 3.8)  | (1.1, 1.5) |
| Italy†                            | 0.05          | 15.1          | 44.5          | 42.4          | 0.9         | 3.1         | 2.9         | 1.2        |
|                                   | (0.05, 0.06)  | (-1.9, 29.3)  | (38.3, 50.1)  | (34.1, 49.8)  | (-0.1, 1.8) | (2.5, 3.7)  | (2.2, 3.6)  | (1.1, 1.4) |
| Jamaica*                          | 0.03          | 32.9          | 41.2          | 24.5          | 2.1         | 2.8         | 1.5         | 1.3        |
|                                   | (0.02, 0.04)  | (9, 50.5)     | (-6.3, 67.4)  | (-62.0, 70.1) | (0.5, 3.7)  | (-0.3, 5.9) | (-2.5, 6.3) | (0.7, 2.5) |
| Japan***                          | 0.07          | 40.2          | 52.3          | 40.8          | 2.7         | 3.9         | 2.8         | 1.8        |
|                                   | (0.06, 0.08)  | (34.7, 45.4)  | (48.4, 55.7)  | (37.2, 44.3)  | (2.2, 3.2)  | (3.5, 4.3)  | (2.4, 3.1)  | (1.6, 2.0) |
| Jordan†                           | 0.10          | 27.5          | 43.0          | 41.0          | 1.7         | 3.0         | 2.8         | 1.0        |
|                                   | (0.07, 0.13)  | (-0.4, 48.4)  | (20.9, 59.4)  | (14.6, 59.7)  | (0, 3.5)    | (1.2, 4.7)  | (0.8, 4.8)  | (0.6, 1.5) |
| Kazakhstan***                     | 0.10          | 51.7          | 79.5          | 70.8          | 3.8         | 8.3         | 6.5         | 1.2        |
|                                   | (0.08, 0.12)  | (34.2, 64.3)  | (76.0, 82.4)  | (65.7, 74.8)  | (2.2, 5.4)  | (7.5, 9.1)  | (5.6, 7.3)  | (1.0, 1.5) |
| Kenya†                            | 1.53          | 12.1          | 26.3          | 68.6          | 0.7         | 1.6         | 6.1         | 0.9        |
|                                   | (1.34, 1.60)  | (-17.8, 36)   | (-4.1, 47.6)  | (56.0, 77.5)  | (-0.9, 2.4) | (-0.2, 3.4) | (4.3, 7.9)  | (0.7, 1.3) |
| Kiribati†                         | 0.00          | 15.7          | 23.0          | 32.4          | 0.9         | 1.4         | 2.1         | 0.6        |
|                                   | (0.00, 0.00)  | (-20.7, 40.5) | (-44.3, 64.5) | (-22.9, 64.4) | (-1, 2.7)   | (-1.9, 5.5) | (-1.1, 5.4) | (0.3, 1.6) |
| Kuwait†                           | 0.02          | 17.6          | 31.0          | 41.8          | 1.0         | 2.0         | 2.8         | 1.3        |
|                                   | (0.01, 0.02)  | (-17.7, 41.6) | (20.4, 40.0)  | (31.8, 50.7)  | (-0.9, 2.8) | (1.2, 2.7)  | (2.0, 3.7)  | (0.8, 1.8) |
| Kyrgyzstan**                      | 0.05          | 36.7          | 40.1          | 79.6          | 2.4         | 2.7         | 8.4         | 0.6        |
|                                   | (0.05, 0.06)  | (17.6, 51.4)  | (22.1, 53.6)  | (70.8, 86.3)  | (1.0, 3.8)  | (1.3, 4.0)  | (6.5, 10.5) | (0.5, 1.0) |
| Lao People's Democratic Republic* | 0.14          | 32.0          | 42.2          | 66.1          | 2.0         | 2.9         | 5.7         | 0.8        |
|                                   | (0.09, 0.2)   | (3.6, 52.8)   | (21.8, 58.9)  | (54.3, 75.7)  | (0.2, 3.9)  | (1.3, 4.7)  | (4.1, 7.4)  | (0.5, 1.3) |
| Latvia***                         | 0.00          | 45.8          | 74.1          | 75.3          | 3.2         | 7.1         | 7.4         | 1.7        |
|                                   | (0.00, 0.00)  | (35.9, 53.9)  | (65.4, 80.4)  | (67.2, 81.7)  | (2.3, 4.1)  | (5.6, 8.6)  | (5.9, 9)    | (1.3, 2.3) |
| Lebanon**                         | 0.04          | 41.4          | 64.5          | 62.4          | 2.8         | 5.4         | 5.2         | 1.5        |
|                                   | (0.02, 0.06)  | (17.3, 58.9)  | (29.6, 84.1)  | (26.2, 84.6)  | (1.0, 4.7)  | (1.8, 9.7)  | (1.6, 9.8)  | (0.6, 3.9) |
| Lesotho†                          | 0.08          | 21.7          | -15.9         | 37.2          | 1.3         | -0.8        | 2.4         | 0.7        |
|                                   | (0.06, 0.11)  | (-8.2, 43)    | (-74.3, 23.6) | (5.8, 58.6)   | (-0.4, 3.0) | (-2.9, 1.4) | (0.3, 4.6)  | (0.4, 1.0) |
| Liberia†                          | 0.20          | 18.8          | 29.1          | 63.8          | 1.1         | 1.8         | 5.4         | 0.7        |
|                                   | (0.13, 0.3)   | (-17, 43.3)   | (1.8, 47.8)   | (52.5, 72.6)  | (-0.8, 3.0) | (0.1, 3.4)  | (3.9, 6.8)  | (0.4, 1.0) |
| Libya**                           | 0.06          | 36.8          | 59.2          | 58.9          | 2.4         | 4.7         | 4.7         | 1.4        |
|                                   | (0.03, 0.08)  | (10.8, 56.1)  | (32.7, 76.2)  | (31.1, 77.2)  | (0.6, 4.3)  | (2.1, 7.6)  | (2.0, 7.8)  | (0.6, 2.5) |
| Lithuania**                       | 0.00          | 39.4          | 55.1          | 73.9          | 2.6         | 4.2         | 7.1         | 1.4        |

|                                   |              |               |               |               |             |             |             |            |
|-----------------------------------|--------------|---------------|---------------|---------------|-------------|-------------|-------------|------------|
|                                   | (0.00, 0.00) | (18.1, 54.8)  | (45.7, 63.0)  | (68.5, 78.7)  | (1.1, 4.2)  | (3.2, 5.2)  | (6.1, 8.1)  | (1.1, 1.7) |
| Luxembourg†                       | 0.00         | 8.1           | 38.5          | 44.1          | 0.4         | 2.6         | 3.1         | 2.3        |
|                                   | (0.00, 0.00) | (-19.6, 29.2) | (13.4, 56.4)  | (20.6, 61.1)  | (-0.9, 1.8) | (0.8, 4.4)  | (1.2, 5)    | (1.5, 3.2) |
| Madagascar†                       | 0.75         | 18.6          | 34.9          | 60.1          | 1.1         | 2.3         | 4.8         | 0.8        |
|                                   | (0.51, 1.01) | (-15, 42.5)   | (14.8, 50.4)  | (48.6, 68.8)  | (-0.7, 2.9) | (0.8, 3.7)  | (3.5, 6.1)  | (0.5, 1.2) |
| Malawi*                           | 0.53         | 26.6          | 48.9          | 84.0          | 1.6         | 3.5         | 9.6         | 0.8        |
|                                   | (0.45, 0.57) | (7.1, 42.3)   | (21.8, 67.7)  | (76.1, 89.9)  | (0.4, 2.9)  | (1.3, 5.9)  | (7.5, 12.1) | (0.5, 1.3) |
| Malaysia†                         | 0.15         | -11.1         | 6.3           | 25.3          | -0.6        | 0.3         | 1.5         | 1.2        |
|                                   | (0.13, 0.16) | (-41.3, 12.6) | (-9.9, 20.2)  | (11.5, 36.4)  | (-1.8, 0.7) | (-0.5, 1.2) | (0.6, 2.4)  | (1.0, 1.3) |
| Maldives***                       | 0.00         | 57.6          | 77.4          | 84.5          | 4.5         | 7.8         | 9.8         | 1.2        |
|                                   | (0.00, 0.00) | (41.8, 69.5)  | (71.3, 82.0)  | (79.4, 88.7)  | (2.8, 6.3)  | (6.6, 9)    | (8.3, 11.5) | (0.9, 1.5) |
| Mali*                             | 0.83         | 30.2          | 36.6          | 55.5          | 1.9         | 2.4         | 4.3         | 0.6        |
|                                   | (0.73, 0.87) | (4.5, 49.5)   | (16.5, 52.4)  | (43.5, 65.0)  | (0.2, 3.6)  | (0.9, 3.9)  | (3.0, 5.5)  | (0.5, 0.8) |
| Malta†                            | 0.00         | 21.6          | 7.2           | 9.4           | 1.3         | 0.4         | 0.5         | 0.6        |
|                                   | (0.00, 0.00) | (-1.5, 39.5)  | (-21.5, 28.7) | (-22.0, 33.9) | (-0.1, 2.6) | (-1, 1.8)   | (-1, 2.2)   | (0.5, 0.9) |
| Marshall Islands†                 | 0.00         | 9.8           | 16.3          | 27.3          | 0.5         | 0.9         | 1.7         | 0.7        |
|                                   | (0.00, 0.00) | (-28.1, 37.8) | (-51.5, 53.6) | (-25.8, 60.8) | (-1.3, 2.5) | (-2.2, 4.0) | (-1.2, 4.9) | (0.4, 1.4) |
| Mauritania†                       | 0.17         | 26.8          | 25.4          | 42.1          | 1.6         | 1.5         | 2.9         | 0.7        |
|                                   | (0.11, 0.25) | (-4.7, 49.1)  | (-46.6, 62.7) | (-14.9, 71.5) | (-0.2, 3.6) | (-2, 5.2)   | (-0.7, 6.6) | (0.3, 1.6) |
| Mauritius*                        | 0.01         | 17.8          | 17.8          | 8.9           | 1.0         | 1.0         | 0.5         | 1.0        |
|                                   | (0.01, 0.01) | (7.7, 27.1)   | (6.1, 27.7)   | (-6.8, 22.4)  | (0.4, 1.7)  | (0.3, 1.7)  | (-0.3, 1.3) | (0.9, 1.2) |
| Mexico*                           | 0.77         | 29.0          | 39.7          | 60.2          | 1.8         | 2.7         | 4.9         | 0.8        |
|                                   | (0.59, 0.92) | (0.9, 50.1)   | (29.7, 48.1)  | (53.2, 66.3)  | (0, 3.7)    | (1.9, 3.5)  | (4.0, 5.7)  | (0.6, 1.0) |
| Micronesia (Federated States of)† | 0.00         | 22.7          | 33.8          | 53.2          | 1.4         | 2.2         | 4.0         | 0.7        |
|                                   | (0.00, 0.00) | (-9, 45.6)    | (-47.4, 70.3) | (-6.5, 80.0)  | (-0.5, 3.2) | (-2, 6.4)   | (-0.3, 8.5) | (0.3, 2.2) |
| Monaco*                           | 0.00         | 35.6          | 40.8          | 38.8          | 2.3         | 2.8         | 2.6         | 0.8        |
|                                   | (0.00, 0.00) | (8.4, 55.1)   | (7.4, 62.4)   | (3.0, 63.9)   | (0.5, 4.2)  | (0.4, 5.2)  | (0.2, 5.4)  | (0.6, 2.4) |
| Mongolia***                       | 0.02         | 56.8          | 65.4          | 82.4          | 4.4         | 5.6         | 9.2         | 0.6        |
|                                   | (0.02, 0.02) | (46.2, 65.3)  | (59.5, 70.2)  | (80.1, 84.6)  | (3.3, 5.6)  | (4.8, 6.4)  | (8.5, 9.8)  | (0.5, 0.8) |
| Montenegro**                      | 0.00         | 31.2          | 85.1          | 81.5          | 2.0         | 10.0        | 8.9         | 2.7        |
|                                   | (0.00, 0.00) | (15.3, 44)    | (80.3, 89.0)  | (74.5, 86.7)  | (0.9, 3.1)  | (8.6, 11.6) | (7.2, 10.6) | (1.9, 3.8) |
| Morocco**                         | 0.49         | 33.5          | 49.3          | 66.0          | 2.1         | 3.6         | 5.7         | 1.0        |
|                                   | (0.36, 0.60) | (10.6, 51)    | (31.0, 63.0)  | (52.3, 75.9)  | (0.6, 3.8)  | (2.0, 5.2)  | (3.9, 7.5)  | (0.7, 1.5) |
| Mozambique†                       | 1.28         | 22.0          | 38.1          | 63.7          | 1.3         | 2.5         | 5.3         | 0.8        |
|                                   | (0.98, 1.54) | (-2.4, 40.9)  | (6.8, 57.6)   | (45.4, 75.0)  | (-0.1, 2.8) | (0.4, 4.5)  | (3.2, 7.3)  | (0.5, 1.2) |
| Myanmar†                          | 0.69         | 29.3          | 39.8          | 57.7          | 1.8         | 2.7         | 4.5         | 0.6        |
|                                   | (0.43, 1.02) | (-0.1, 51.1)  | (11.0, 60.9)  | (37.8, 72.5)  | (0, 3.8)    | (0.6, 4.9)  | (2.5, 6.8)  | (0.4, 1.3) |
| Namibia†                          | 0.05         | 15.9          | 15.4          | 56.1          | 0.9         | 0.9         | 4.3         | 0.8        |
|                                   | (0.03, 0.08) | (-19.5, 40.4) | (-59.1, 53.4) | (17.2, 76.0)  | (-0.9, 2.7) | (-2.4, 4.0) | (1.0, 7.5)  | (0.3, 1.4) |
| Nauru†                            | 0.00         | 12.3          | 18.5          | 35.9          | 0.7         | 1.1         | 2.3         | 0.7        |
|                                   | (0.00, 0.00) | (-23.9, 38.3) | (-55.3, 59.7) | (-31.1, 75.1) | (-1.1, 2.5) | (-2.3, 4.8) | (-1.4, 7.3) | (0.3, 1.5) |
| Nepal**                           | 0.51         | 43.8          | 51.0          | 73.5          | 3.0         | 3.8         | 7.0         | 0.9        |
|                                   | (0.37, 0.64) | (23.3, 58.6)  | (34.7, 63.0)  | (64.0, 80.3)  | (1.4, 4.6)  | (2.2, 5.2)  | (5.4, 8.6)  | (0.6, 1.3) |
| Netherlands***                    | 0.02         | 55.3          | 32.4          | 38.6          | 4.2         | 2.1         | 2.6         | 0.9        |



|                                 |               |               |                |                |             |             |             |            |
|---------------------------------|---------------|---------------|----------------|----------------|-------------|-------------|-------------|------------|
|                                 | (0.02, 0.02)  | (46.4, 62.6)  | (28.1, 36.5)   | (33.2, 43.6)   | (3.3, 5.2)  | (1.7, 2.4)  | (2.1, 3.0)  | (0.7, 1.0) |
| New Zealand*                    | 0.01          | 26.3          | 24.8           | 45.9           | 1.6         | 1.5         | 3.2         | 1.0        |
|                                 | (0.01, 0.01)  | (7.9, 40.6)   | (8.3, 40.1)    | (32.5, 57.8)   | (0.4, 2.7)  | (0.5, 2.7)  | (2.1, 4.5)  | (0.8, 1.5) |
| Nicaragua*                      | 0.07          | 29.6          | 37.9           | 71.0           | 1.8         | 2.5         | 6.5         | 1.1        |
|                                 | (0.05, 0.1)   | (0.8, 50.1)   | (21.7, 49.6)   | (63.4, 76.7)   | (0, 3.7)    | (1.3, 3.6)  | (5.3, 7.7)  | (0.6, 1.5) |
| Niger†                          | 1.08          | 28.4          | 43.7           | 69.7           | 1.8         | 3.0         | 6.3         | 0.8        |
|                                 | (0.76, 1.42)  | (-2.1, 50.6)  | (8.5, 65.5)    | (51.8, 81.3)   | (-0.1, 3.7) | (0.5, 5.6)  | (3.8, 8.8)  | (0.4, 1.4) |
| Nigeria†                        | 8.72          | 19.0          | 22.6           | 41.2           | 1.1         | 1.3         | 2.8         | 0.6        |
|                                 | (5.68, 12.25) | (-15.8, 43.1) | (-3.4, 41.3)   | (22.5, 54.4)   | (-0.8, 3.0) | (-0.2, 2.8) | (1.3, 4.1)  | (0.4, 1.0) |
| Niue†                           | 0.00          | 15.5          | 3.4            | 0.5            | 0.9         | 0.2         | 0.0         | 0.7        |
|                                 | (0.00, 0.00)  | (-21.1, 40.3) | (-111.3, 55.2) | (-116.9, 56.4) | (-1, 2.7)   | (-3.9, 4.2) | (-4.1, 4.4) | (0.3, 2.2) |
| Norway**                        | 0.01          | 33.5          | 47.7           | 52.2           | 2.1         | 3.4         | 3.9         | 1.7        |
|                                 | (0.01, 0.01)  | (23.7, 42.4)  | (40.4, 54.3)   | (44.6, 58.9)   | (1.4, 2.9)  | (2.7, 4.1)  | (3.1, 4.7)  | (1.5, 2.1) |
| Oman**                          | 0.03          | 30.7          | 30.6           | 30.6           | 1.9         | 1.9         | 1.9         | 1.1        |
|                                 | (0.02, 0.03)  | (10.7, 46.9)  | (9.5, 48.5)    | (12.0, 47.6)   | (0.6, 3.3)  | (0.5, 3.5)  | (0.7, 3.4)  | (0.7, 1.5) |
| Pakistan†                       | 9.69          | 23.2          | 27.6           | 49.4           | 1.4         | 1.7         | 3.6         | 0.7        |
|                                 | (7.83, 11.1)  | (-0.8, 41.2)  | (13.8, 39.4)   | (38.6, 58.5)   | (0, 2.8)    | (0.8, 2.6)  | (2.6, 4.6)  | (0.6, 1.0) |
| Palau†                          | 0.00          | 26.9          | 40.9           | 38.7           | 1.7         | 2.8         | 2.6         | 0.8        |
|                                 | (0.00, 0.00)  | (-4.5, 49)    | (-17.4, 70.6)  | (-19.9, 71.5)  | (-0.2, 3.5) | (-0.8, 6.4) | (-1, 6.6)   | (0.4, 2.1) |
| Panama*                         | 0.03          | 32.9          | 43.6           | 41.9           | 2.1         | 3.0         | 2.9         | 0.9        |
|                                 | (0.02, 0.05)  | (4.4, 53.2)   | (-4.5, 69.8)   | (-7.0, 70.9)   | (0.2, 4.0)  | (-0.2, 6.3) | (-0.4, 6.5) | (0.4, 2.1) |
| Papua New Guinea†               | 0.20          | 16.6          | 28.6           | 43.2           | 1.0         | 1.8         | 3.0         | 0.7        |
|                                 | (0.12, 0.29)  | (-19.4, 41.7) | (-0.4, 50.9)   | (19.5, 61.0)   | (-0.9, 2.8) | (0, 3.7)    | (1.1, 4.9)  | (0.4, 1.3) |
| Paraguay**                      | 0.08          | 38.2          | 40.2           | 45.2           | 2.5         | 2.7         | 3.2         | 1.0        |
|                                 | (0.05, 0.10)  | (13, 55.4)    | (-15.7, 68.0)  | (-6.1, 71.5)   | (0.7, 4.2)  | (-0.8, 6)   | (-0.3, 6.6) | (0.5, 2.2) |
| Peru***                         | 0.21          | 48.2          | 60.1           | 69.9           | 3.5         | 4.8         | 6.3         | 1.1        |
|                                 | (0.16, 0.24)  | (32.1, 61.3)  | (47.9, 69.0)   | (61.1, 76.6)   | (2.0, 5)    | (3.4, 6.2)  | (5.0, 7.6)  | (0.9, 1.7) |
| Philippines*                    | 1.17          | 25.7          | 18.6           | 34.7           | 1.6         | 1.1         | 2.2         | 0.8        |
|                                 | (0.86, 1.46)  | (0.2, 45)     | (-10.5, 39.8)  | (11.2, 52.2)   | (0, 3.1)    | (-0.5, 2.7) | (0.6, 3.9)  | (0.5, 1.2) |
| Poland***                       | 0.04          | 45.5          | 52.8           | 52.9           | 3.2         | 4.0         | 4.0         | 0.9        |
|                                 | (0.04, 0.05)  | (41.6, 49.1)  | (50.4, 55.2)   | (49.9, 55.7)   | (2.8, 3.6)  | (3.7, 4.2)  | (3.6, 4.3)  | (0.8, 0.9) |
| Portugal***                     | 0.01          | 38.0          | 41.3           | 55.4           | 2.5         | 2.8         | 4.2         | 1.3        |
|                                 | (0.01, 0.01)  | (31.6, 43.9)  | (34.7, 47.5)   | (50.1, 60.2)   | (2.0, 3.0)  | (2.2, 3.4)  | (3.7, 4.8)  | (1.1, 1.5) |
| Qatar†                          | 0.01          | 14.7          | 48.7           | 47.0           | 0.8         | 3.5         | 3.3         | 1.6        |
|                                 | (0.01, 0.01)  | (-11.7, 34.4) | (37.9, 57.2)   | (36.4, 56.8)   | (-0.6, 2.2) | (2.5, 4.5)  | (2.4, 4.4)  | (1.2, 2.1) |
| Republic of Korea***            | 0.03          | 44.8          | 54.8           | 60.0           | 3.1         | 4.2         | 4.8         | 1.1        |
|                                 | (0.03, 0.03)  | (27.6, 57.3)  | (49.4, 59.5)   | (55.7, 64.1)   | (1.7, 4.5)  | (3.6, 4.8)  | (4.3, 5.4)  | (0.9, 1.3) |
| Republic of Moldova**           | 0.01          | 41.3          | 48.6           | 65.7           | 2.8         | 3.5         | 5.6         | 0.6        |
|                                 | (0.01, 0.02)  | (18.4, 58.4)  | (23.9, 65.0)   | (43.7, 79.8)   | (1.1, 4.6)  | (1.4, 5.5)  | (3.0, 8.4)  | (0.4, 1.2) |
| Republic of North Macedonia**** | 0.00          | 62.0          | 57.1           | 67.2           | 5.1         | 4.4         | 5.9         | 1.0        |
|                                 | (0.00, 0.01)  | (55.4, 67.4)  | (49.6, 63.7)   | (59.8, 73.5)   | (4.3, 5.9)  | (3.6, 5.3)  | (4.8, 7)    | (1.0, 1.5) |

|                                   |              |               |               |               |             |             |              |            |
|-----------------------------------|--------------|---------------|---------------|---------------|-------------|-------------|--------------|------------|
| Romania***                        | 0.03         | 52.0          | 67.0          | 67.9          | 3.9         | 5.8         | 6.0          | 0.9        |
|                                   | (0.03, 0.03) | (41.4, 60.8)  | (58.2, 73.7)  | (59.9, 74.3)  | (2.8, 4.9)  | (4.6, 7)    | (4.8, 7.1)   | (0.8, 1.1) |
| Russian Federation***             | 0.35         | 43.9          | 70.8          | 69.7          | 3.0         | 6.5         | 6.3          | 1.4        |
|                                   | (0.29, 0.38) | (36.8, 50.3)  | (66.9, 74.4)  | (66.0, 72.8)  | (2.4, 3.7)  | (5.8, 7.2)  | (5.7, 6.9)   | (1.3, 1.9) |
| Rwanda**                          | 0.35         | 40.9          | 61.1          | 87.0          | 2.8         | 5.0         | 10.7         | 1.1        |
|                                   | (0.28, 0.40) | (19.1, 57)    | (30.9, 78.3)  | (76.6, 92.7)  | (1.1, 4.4)  | (1.9, 8.1)  | (7.6, 13.8)  | (0.6, 1.9) |
| Saint Kitts and Nevis†            | 0.00         | 29.7          | 38.0          | 29.7          | 1.9         | 2.5         | 1.9          | 0.7        |
|                                   | (0.00, 0.00) | (-1.8, 51)    | (7.4, 58.1)   | (-12.5, 57.4) | (-0.1, 3.8) | (0.4, 4.6)  | (-0.6, 4.5)  | (0.4, 1.1) |
| Saint Lucia†                      | 0.00         | 16.5          | -9.4          | -40.1         | 1.0         | -0.5        | -1.8         | 0.9        |
|                                   | (0.00, 0.00) | (-4.8, 33.1)  | (-34.4, 11.8) | (-79.6, -7.7) | (-0.2, 2.1) | (-1.6, 0.7) | (-3.1, -0.4) | (0.7, 1.1) |
| Saint Vincent and the Grenadines† | 0.00         | -11.1         | 30.9          | 39.1          | -0.6        | 1.9         | 2.6          | 1.3        |
|                                   | (0.00, 0.00) | (-44, 14)     | (8.3, 48.3)   | (15.1, 56.8)  | (-1.9, 0.8) | (0.5, 3.5)  | (0.9, 4.4)   | (0.9, 1.8) |
| Samoa†                            | 0.00         | 18.8          | 28.3          | 26.9          | 1.1         | 1.7         | 1.6          | 1.1        |
|                                   | (0.00, 0.00) | (-16, 43.4)   | (-13.4, 55.1) | (-16.9, 56.1) | (-0.8, 3.0) | (-0.7, 4.2) | (-0.8, 4.3)  | (0.5, 2.1) |
| San Marino**                      | 0.00         | 45.8          | 74.3          | 70.1          | 3.2         | 7.1         | 6.3          | 2.3        |
|                                   | (0.00, 0.00) | (21.6, 62.2)  | (42.2, 91.2)  | (33.0, 87.7)  | (1.3, 5.1)  | (2.9, 12.8) | (2.1, 11)    | (1.0, 7)   |
| Sao Tome and Principe†            | 0.00         | 25.3          | 37.7          | 74.5          | 1.5         | 2.5         | 7.2          | 0.9        |
|                                   | (0.00, 0.01) | (-4.7, 47.5)  | (-20.2, 66.2) | (55.9, 86.9)  | (-0.2, 3.4) | (-1, 5.7)   | (4.3, 10.7)  | (0.4, 1.7) |
| Saudi Arabia**                    | 0.15         | 45.9          | 69.9          | 69.8          | 3.2         | 6.3         | 6.3          | 1.4        |
|                                   | (0.09, 0.22) | (21.9, 61.6)  | (55.7, 80.1)  | (53.7, 80.9)  | (1.3, 5)    | (4.3, 8.5)  | (4.1, 8.7)   | (0.7, 2.5) |
| Senegal*                          | 0.57         | 22.1          | 42.0          | 74.8          | 1.3         | 2.9         | 7.3          | 0.9        |
|                                   | (0.5, 0.59)  | (3.6, 37.5)   | (23.1, 56.0)  | (67.1, 81.0)  | (0.2, 2.5)  | (1.4, 4.3)  | (5.8, 8.7)   | (0.7, 1.2) |
| Serbia*                           | 0.02         | 15.7          | 58.7          | 57.5          | 0.9         | 4.7         | 4.5          | 1.4        |
|                                   | (0.02, 0.02) | (4.6, 25.2)   | (48.0, 67.5)  | (45.2, 67.2)  | (0.2, 1.5)  | (3.4, 5.9)  | (3.2, 5.9)   | (1.1, 1.8) |
| Seychelles†                       | 0.00         | -5.6          | 1.0           | -11.4         | -0.3        | 0.1         | -0.6         | 1.1        |
|                                   | (0.00, 0.00) | (-43, 21.6)   | (-40.5, 31.2) | (-67.0, 27.1) | (-1.9, 1.3) | (-1.8, 2.0) | (-2.7, 1.7)  | (0.7, 1.7) |
| Sierra Leone*                     | 0.32         | 30.8          | 36.6          | 57.1          | 1.9         | 2.4         | 4.5          | 0.8        |
|                                   | (0.2, 0.47)  | (1.3, 51.6)   | (17.5, 52.9)  | (47.3, 65.1)  | (0.1, 3.8)  | (1.0, 4.0)  | (3.4, 5.5)   | (0.5, 1.2) |
| Singapore**                       | 0.01         | 33.1          | 43.8          | 27.4          | 2.1         | 3.0         | 1.7          | 2.2        |
|                                   | (0.00, 0.01) | (18, 45.1)    | (31.4, 54.2)  | (14.8, 38.3)  | (1.0, 3.2)  | (2.0, 4.1)  | (0.8, 2.5)   | (1.9, 3.1) |
| Slovakia**                        | 0.01         | 29.9          | 42.7          | 39.4          | 1.9         | 2.9         | 2.6          | 1.0        |
|                                   | (0.01, 0.01) | (21.5, 37.6)  | (37.1, 47.7)  | (33.3, 45.0)  | (1.3, 2.5)  | (2.4, 3.4)  | (2.1, 3.1)   | (0.8, 1.1) |
| Slovenia**                        | 0.00         | 28.9          | 64.3          | 59.2          | 1.8         | 5.4         | 4.7          | 2.2        |
|                                   | (0.00, 0.00) | (13.1, 41.9)  | (56.4, 70.7)  | (48.1, 67.3)  | (0.7, 2.9)  | (4.4, 6.5)  | (3.5, 5.9)   | (1.7, 2.8) |
| Solomon Islands†                  | 0.01         | 23.1          | 36.3          | 35.0          | 1.4         | 2.4         | 2.3          | 1.2        |
|                                   | (0.01, 0.02) | (-8.7, 45.8)  | (-3.1, 63.2)  | (-1.3, 60.3)  | (-0.4, 3.2) | (-0.2, 5.3) | (-0.1, 4.9)  | (0.6, 2.3) |
| Somalia†                          | 0.90         | 10.4          | 16.2          | 37.5          | 0.6         | 0.9         | 2.5          | 0.7        |
|                                   | (0.57, 1.33) | (-25.9, 36.9) | (-70.7, 60.9) | (-19.3, 67.5) | (-1.2, 2.4) | (-2.8, 4.9) | (-0.9, 5.9)  | (0.3, 1.8) |
| South Africa†                     | 1.00         | 21.1          | 23.1          | 59.2          | 1.2         | 1.4         | 4.7          | 1.4        |
|                                   | (0.76, 1.21) | (-6.1, 41)    | (-2.3, 43.7)  | (51.5, 66.0)  | (-0.3, 2.8) | (-0.1, 3.0) | (3.8, 5.7)   | (1.0, 1.8) |
| South Sudan†                      | 0.59         | 15.9          | 31.0          | 54.8          | 0.9         | 2.0         | 4.2          | 0.7        |

|                         |              |               |               |               |             |             |             |            |
|-------------------------|--------------|---------------|---------------|---------------|-------------|-------------|-------------|------------|
|                         | (0.37, 0.86) | (-17.7, 40.1) | (-66.5, 76.7) | (1.1, 85.2)   | (-0.9, 2.7) | (-2.7, 7.7) | (0.1, 10.1) | (0.3, 2.2) |
| Spain**                 | 0.04         | 31.2          | 36.2          | 50.2          | 2.0         | 2.4         | 3.7         | 1.2        |
|                         | (0.04, 0.05) | (20.3, 40.5)  | (26.7, 44.9)  | (41.2, 58.7)  | (1.2, 2.7)  | (1.6, 3.1)  | (2.8, 4.7)  | (1.0, 1.5) |
| Sri Lanka***            | 0.10         | 43.2          | 55.4          | 59.5          | 3.0         | 4.2         | 4.8         | 1.4        |
|                         | (0.09, 0.10) | (27.7, 55.6)  | (44.3, 64.2)  | (48.7, 69.0)  | (1.7, 4.3)  | (3.1, 5.4)  | (3.5, 6.2)  | (1.1, 1.7) |
| State of Palestine*     | 0.08         | 30.2          | 35.3          | 35.4          | 1.9         | 2.3         | 2.3         | 1.0        |
|                         | (0.05, 0.11) | (0.6, 50.5)   | (4.2, 55.9)   | (2.3, 56.8)   | (0, 3.7)    | (0.2, 4.3)  | (0.1, 4.4)  | (0.6, 1.8) |
| Sudan†                  | 1.61         | 23.6          | 26.2          | 53.6          | 1.4         | 1.6         | 4.0         | 0.8        |
|                         | (1.06, 2.23) | (-7.8, 46.1)  | (-3.5, 47.4)  | (36.6, 67.4)  | (-0.4, 3.3) | (-0.2, 3.4) | (2.4, 5.9)  | (0.5, 1.4) |
| Suriname†               | 0.01         | 22.4          | 34.9          | 51.6          | 1.3         | 2.3         | 3.8         | 1.0        |
|                         | (0.00, 0.01) | (-9.8, 45.6)  | (-11.1, 60.6) | (11.8, 75.6)  | (-0.5, 3.2) | (-0.6, 4.9) | (0.7, 7.4)  | (0.5, 1.7) |
| Sweden**                | 0.01         | 34.4          | 40.6          | 32.9          | 2.2         | 2.7         | 2.1         | 1.8        |
|                         | (0.01, 0.02) | (24, 43.1)    | (34.1, 46.4)  | (24.7, 40.2)  | (1.4, 3.0)  | (2.2, 3.3)  | (1.5, 2.7)  | (1.5, 2.1) |
| Switzerland*            | 0.01         | 19.0          | 20.3          | 42.4          | 1.1         | 1.2         | 2.9         | 0.8        |
|                         | (0.01, 0.01) | (0.6, 33.5)   | (8.7, 30.8)   | (30.6, 52.7)  | (0, 2.1)    | (0.5, 1.9)  | (1.9, 3.9)  | (0.7, 1.0) |
| Syrian Arab Republic†   | 0.24         | 14.4          | 11.7          | 1.1           | 0.8         | 0.7         | 0.1         | 1.0        |
|                         | (0.15, 0.35) | (-21.8, 39.2) | (-28.0, 51.4) | (-41.3, 46.9) | (-1, 2.6)   | (-1.3, 3.8) | (-1.8, 3.3) | (0.6, 1.9) |
| Tajikistan*             | 0.13         | 34.7          | 47.3          | 66.4          | 2.2         | 3.4         | 5.7         | 0.6        |
|                         | (0.08, 0.19) | (7.3, 54.5)   | (10.5, 70.8)  | (43.4, 79.7)  | (0.4, 4.1)  | (0.6, 6.5)  | (3.0, 8.4)  | (0.3, 1.3) |
| Thailand**              | 0.21         | 45.2          | 58.6          | 59.7          | 3.2         | 4.6         | 4.8         | 1.1        |
|                         | (0.13, 0.3)  | (22.1, 61.5)  | (44.1, 68.7)  | (41.6, 71.1)  | (1.3, 5)    | (3.1, 6.1)  | (2.8, 6.5)  | (0.6, 1.9) |
| Timor-Leste*            | 0.03         | 37.1          | 46.8          | 66.0          | 2.4         | 3.3         | 5.7         | 0.7        |
|                         | (0.02, 0.04) | (9, 56.1)     | (3.5, 72.4)   | (40.7, 81.4)  | (0.5, 4.3)  | (0.2, 6.8)  | (2.8, 8.9)  | (0.3, 1.5) |
| Togo†                   | 0.31         | 21.4          | 31.4          | 49.1          | 1.3         | 2.0         | 3.6         | 0.9        |
|                         | (0.19, 0.45) | (-10.2, 45.3) | (11.3, 47.8)  | (36.3, 60.1)  | (-0.5, 3.2) | (0.6, 3.4)  | (2.4, 4.8)  | (0.5, 1.4) |
| Tonga†                  | 0.00         | 8.5           | 5.9           | 9.3           | 0.5         | 0.3         | 0.5         | 1.0        |
|                         | (0.00, 0.00) | (-30.5, 34.9) | (-48.5, 40.4) | (-34.9, 42.0) | (-1.4, 2.3) | (-2.1, 2.7) | (-1.6, 2.9) | (0.5, 1.7) |
| Trinidad and Tobago†    | 0.01         | 23.5          | 38.7          | 36.3          | 1.4         | 2.6         | 2.4         | 0.8        |
|                         | (0.01, 0.01) | (-8.1, 46.3)  | (-26.3, 70.6) | (-33.9, 72.0) | (-0.4, 3.3) | (-1.2, 6.5) | (-1.5, 6.7) | (0.3, 1.9) |
| Tunisia**               | 0.11         | 35.5          | 36.6          | 55.8          | 2.3         | 2.4         | 4.3         | 0.9        |
|                         | (0.09, 0.13) | (10.7, 53.8)  | (22.9, 47.3)  | (42.0, 66.4)  | (0.6, 4.1)  | (1.4, 3.4)  | (2.9, 5.7)  | (0.8, 1.1) |
| Turkey****              | 0.30         | 63.4          | 71.7          | 76.4          | 5.3         | 6.6         | 7.6         | 0.8        |
|                         | (0.26, 0.31) | (54.7, 70.2)  | (66.0, 76.3)  | (71.8, 80.2)  | (4.2, 6.4)  | (5.7, 7.6)  | (6.7, 8.5)  | (0.7, 1.0) |
| Turkmenistan†           | 0.06         | 15.1          | 20.5          | 54.4          | 0.9         | 1.2         | 4.1         | 0.4        |
|                         | (0.04, 0.09) | (-20.1, 39.7) | (-16.2, 46.9) | (31.6, 69.6)  | (-1, 2.7)   | (-0.8, 3.3) | (2.0, 6.3)  | (0.2, 0.6) |
| Tuvalu†                 | 0.00         | 19.5          | 33.7          | 54.0          | 1.1         | 2.2         | 4.1         | 0.7        |
|                         | (0.00, 0.00) | (-13.8, 43.3) | (-29.2, 65.2) | (4.3, 78.2)   | (-0.7, 3.0) | (-1.3, 5.6) | (0.2, 8)    | (0.3, 1.6) |
| Uganda*                 | 1.52         | 23.5          | 37.7          | 77.6          | 1.4         | 2.5         | 7.9         | 0.9        |
|                         | (1.33, 1.61) | (3.8, 39.3)   | (13.7, 55.3)  | (69.9, 83.6)  | (0.2, 2.6)  | (0.8, 4.2)  | (6.3, 9.5)  | (0.6, 1.3) |
| Ukraine**               | 0.09         | 33.5          | 55.1          | 53.3          | 2.1         | 4.2         | 4.0         | 0.9        |
|                         | (0.08, 0.11) | (12.3, 49.1)  | (42.7, 67.5)  | (32.2, 69.3)  | (0.7, 3.6)  | (2.9, 5.9)  | (2.0, 6.2)  | (0.7, 1.3) |
| United Arab Emirates*** | 0.03         | 41.5          | 32.8          | 33.8          | 2.8         | 2.1         | 2.2         | 1.2        |

|                                     |                      |                       |                        |                      |                    |                    |                    |                   |
|-------------------------------------|----------------------|-----------------------|------------------------|----------------------|--------------------|--------------------|--------------------|-------------------|
|                                     | (0.02, 0.03)         | (32.2, 49.8)          | (15.4, 48.5)           | (11.0, 48.4)         | (2.0, 3.6)         | (0.9, 3.5)         | (0.6, 3.5)         | (1.0, 1.5)        |
| United Kingdom**                    | 0.12<br>(0.1, 0.13)  | 31.6<br>(16.9, 43.6)  | 26.8<br>(22.0, 31.3)   | 45.7<br>(41.1, 49.9) | 2.0<br>(1.0, 3.0)  | 1.6<br>(1.3, 2.0)  | 3.2<br>(2.8, 3.6)  | 1.1<br>(0.9, 1.2) |
| United Republic of Tanzania*        | 2.06<br>(1.57, 2.50) | 25.6<br>(0.8, 44)     | 39.5<br>(16.0, 55.6)   | 68.9<br>(57.2, 77.1) | 1.6<br>(0, 3.0)    | 2.6<br>(0.9, 4.3)  | 6.2<br>(4.5, 7.8)  | 0.9<br>(0.6, 1.4) |
| United States of America†           | 0.60<br>(0.5, 0.67)  | 9.3<br>(-4.2, 21.2)   | 20.3<br>(14.2, 26.0)   | 27.2<br>(21.1, 32.7) | 0.5<br>(-0.2, 1.3) | 1.2<br>(0.8, 1.6)  | 1.7<br>(1.2, 2.1)  | 0.8<br>(0.7, 0.9) |
| Uruguay***                          | 0.01<br>(0.01, 0.01) | 35.8<br>(27.3, 43.2)  | 50.0<br>(44.4, 55.1)   | 66.8<br>(62.3, 70.7) | 2.3<br>(1.7, 3.0)  | 3.6<br>(3.1, 4.2)  | 5.8<br>(5.1, 6.5)  | 1.1<br>(1.0, 1.3) |
| Uzbekistan**                        | 0.23<br>(0.15, 0.34) | 41.3<br>(15.9, 58.9)  | 64.7<br>(51.6, 76.1)   | 78.3<br>(68.6, 86.3) | 2.8<br>(0.9, 4.7)  | 5.5<br>(3.8, 7.5)  | 8.0<br>(6.1, 10.5) | 0.7<br>(0.4, 1.3) |
| Vanuatu†                            | 0.00<br>(0.00, 0.01) | 9.3<br>(-31.1, 35.7)  | 9.2<br>(-75.2, 53.1)   | 8.0<br>(-64.2, 51.7) | 0.5<br>(-1.4, 2.3) | 0.5<br>(-3, 4.0)   | 0.4<br>(-2.6, 3.8) | 1.0<br>(0.5, 2.2) |
| Venezuela (Bolivarian Republic of)† | 0.25<br>(0.16, 0.37) | 4.5<br>(-38.2, 33.8)  | -31.9<br>(-67.2, -0.9) | 8.4<br>(-32.5, 42.3) | 0.2<br>(-1.7, 2.2) | -1.5<br>(-2.7, 0)  | 0.5<br>(-1.5, 2.9) | 0.6<br>(0.4, 1.2) |
| Viet Nam**                          | 0.63<br>(0.43, 0.86) | 41.1<br>(15.5, 58.9)  | 32.1<br>(-1.3, 53.5)   | 34.1<br>(1.9, 56.9)  | 2.8<br>(0.9, 4.7)  | 2.0<br>(-0.1, 4.0) | 2.2<br>(0.1, 4.4)  | 0.7<br>(0.5, 1.3) |
| Yemen†                              | 1.08<br>(0.78, 1.37) | 10.7<br>(-26.7, 37.1) | 27.6<br>(-17.9, 57.3)  | 45.9<br>(10.0, 68.5) | 0.6<br>(-1.2, 2.4) | 1.7<br>(-0.9, 4.5) | 3.2<br>(0.6, 6.1)  | 0.9<br>(0.5, 1.6) |
| Zambia*                             | 0.49<br>(0.39, 0.57) | 28.6<br>(1.8, 48.2)   | 31.3<br>(10.6, 47.6)   | 67.9<br>(59.1, 75.1) | 1.8<br>(0.1, 3.5)  | 2.0<br>(0.6, 3.4)  | 6.0<br>(4.7, 7.3)  | 0.6<br>(0.5, 0.9) |
| Zimbabwe*                           | 0.36<br>(0.32, 0.38) | 29.7<br>(6.2, 47.2)   | 2.2<br>(-34.5, 29.6)   | 56.6<br>(40.7, 68.6) | 1.9<br>(0.3, 3.4)  | 0.1<br>(-1.6, 1.8) | 4.4<br>(2.7, 6.1)  | 0.6<br>(0.5, 0.9) |

Table A8: Series in SBR database by country or territory

Note: The series name refers to a specific data collection source and estimation method. There are several sources including vital registration data (including sample vital registration data) and sample surveys – where: vital registration series are based on birth and death registration data and survey series are based on data births and stillbirths from pregnancy histories or reproductive calendars.

| Country or territory | Data series                                                   | Inclusion |
|----------------------|---------------------------------------------------------------|-----------|
| Afghanistan          | Health Survey 2018                                            | 0         |
|                      | Afghanistan Mortality Survey 2010                             | 0         |
|                      | HMIS-DHIS2 data submitted to WHO/UN IGME version 2014         | 0         |
|                      | Demographic and Health Survey 2015                            | 0         |
| Albania              | Demographic and Health Survey 2008-09                         | 0         |
|                      | HMIS-DHIS2 data submitted to WHO/UN IGME version 2014         | 1         |
|                      | Vital Registration data submitted to WHO/UN IGME version 2018 | 1         |
|                      | Demographic and Health Survey 2017-18                         | 0         |
| Algeria              | Vital Registration data submitted to WHO/UN IGME version 2020 | 1         |
| Andorra              | Birth or Death Registry                                       | 1         |
| Angola               | Inquérito de Indicadores Múltiplos e de Saúde 2015-16         | 0         |
| Argentina            | Vital Registration data submitted to WHO/UN IGME version 2020 | 1         |
| Armenia              | Vital Registration data submitted to WHO/UN IGME version 2020 | 1         |
|                      | Demographic and Health Survey 2005                            | 0         |

|                                  |                                                                                                           |   |
|----------------------------------|-----------------------------------------------------------------------------------------------------------|---|
|                                  | Demographic and Health Survey 2010                                                                        | 0 |
|                                  | Demographic and Health Survey 2015-16                                                                     | 0 |
| Australia                        | Vital Registration data submitted to WHO/UN IGME version 2019                                             | 1 |
| Austria                          | Vital Registration data submitted to WHO/UN IGME version 2020                                             | 1 |
| Azerbaijan                       | Vital Registration data submitted to WHO/UN IGME version 2014                                             | 0 |
|                                  | Demographic and Health Survey 2006                                                                        | 1 |
| Bahamas                          | Vital Registration data submitted to WHO/UN IGME version 2019                                             | 1 |
| Bahrain                          | HMIS-DHIS2 data submitted to WHO/UN IGME version 2014                                                     | 1 |
| Bangladesh                       | Demographic and Health Survey 2004                                                                        | 1 |
|                                  | Cherry 2008                                                                                               | 1 |
|                                  | West 2011                                                                                                 | 1 |
|                                  | Demographic and Health Survey 2007                                                                        | 1 |
|                                  | Baqui 2011                                                                                                | 1 |
|                                  | Khanam 2017                                                                                               | 0 |
|                                  | Prost 2013                                                                                                | 1 |
|                                  | Ellis 2011                                                                                                | 0 |
|                                  | Azad 2010                                                                                                 | 1 |
|                                  | Nahar 2013                                                                                                | 0 |
|                                  | Shah 2014                                                                                                 | 1 |
|                                  | Sikder 2014                                                                                               | 0 |
|                                  | Demographic and Health Survey 2011                                                                        | 1 |
|                                  | West 2014                                                                                                 | 0 |
|                                  | HMIS-DHIS2 data submitted to WHO/UN IGME version 2014                                                     | 0 |
|                                  | Halim 2018                                                                                                | 1 |
|                                  | Owais 2013                                                                                                | 0 |
|                                  | Nelson 2018                                                                                               | 1 |
|                                  | Hanifi 2012, 2013, 2014, 2015, 2016, 2017                                                                 | 1 |
|                                  | Demographic and Health Survey 2014                                                                        | 1 |
|                                  | AMANHI 2018                                                                                               | 1 |
|                                  | Vital Registration data submitted to WHO/UN IGME version 2019                                             | 0 |
|                                  | Child Health and Mortality Prevention Surveillance Network (CHAMPS) Program                               | 1 |
| Belarus                          | Vital Registration data submitted to WHO/UN IGME version 2019                                             | 1 |
| Belgium                          | Vital Registration data submitted to WHO/UN IGME version 2019                                             | 1 |
| Belize                           | Vital Registration data submitted to WHO/UN IGME version 2014                                             | 1 |
| Benin                            | Enquête démographique et de santé 2006                                                                    | 0 |
|                                  | HMIS-DHIS2 data submitted to WHO/UN IGME version 2014                                                     | 1 |
|                                  | Demographic and Health Survey 2011-12                                                                     | 0 |
|                                  | Demographic and Health Survey 2017-18                                                                     | 0 |
| Bhutan                           | HMIS-DHIS2 data submitted to WHO/UN IGME version 2019                                                     | 1 |
| Bolivia (Plurinational State of) | Encuesta Nacional de Demografía y Salud 2003                                                              | 0 |
|                                  | Encuesta Nacional de Demografía y Salud 2008                                                              | 0 |
|                                  | Demographic and Health Survey 2016                                                                        | 1 |
| Bosnia and Herzegovina           | Vital Registration data submitted to WHO/UN IGME version 2015                                             | 1 |
|                                  | Skokic 2006                                                                                               | 0 |
| Botswana                         | HMIS-DHIS2 data submitted to WHO/UN IGME version 2020 data obtained by active search version 2020         | 1 |
|                                  | Vital Registration data submitted to WHO/UN IGME version 2020 data obtained by active search version 2020 | 1 |
| Brazil                           | Vital Registration data submitted to WHO/UN IGME version 2019                                             | 0 |
|                                  | HMIS-DHIS2 data submitted to WHO/UN IGME version 2020                                                     | 1 |
|                                  | Vieira 2016                                                                                               | 0 |
|                                  | Barros 2005                                                                                               | 0 |
|                                  | Nascimento 2017                                                                                           | 0 |
|                                  | Maria 2017                                                                                                | 0 |
|                                  | Andrews 2017                                                                                              | 0 |
|                                  | Silva 2015                                                                                                | 0 |
| Brunei Darussalam                | Vital Registration data submitted to WHO/UN IGME version 2019                                             | 1 |

|                                  |                                                                                                        |   |
|----------------------------------|--------------------------------------------------------------------------------------------------------|---|
|                                  | Birth or Death Registry                                                                                | 1 |
| Bulgaria                         | Vital Registration data submitted to WHO/UN IGME version 2019                                          | 1 |
| Burkina Faso                     | Enquête démographique et de santé 2003                                                                 | 0 |
|                                  | HMIS-DHIS2 data submitted to WHO/UN IGME version 2014                                                  | 1 |
|                                  | Roberfroid 2008                                                                                        | 0 |
|                                  | Enquête démographique et de santé et à Indicateurs Multiples 2010                                      | 0 |
| Burundi                          | Enquête démographique et de santé 2010                                                                 | 1 |
|                                  | Enquête démographique et de santé 2016-17                                                              | 1 |
|                                  | HMIS-DHIS2 data submitted to WHO/UN IGME version 2020                                                  | 1 |
| Cape Verde                       | II Inquérito Demográfico e de Saúde Reprodutiva 2005                                                   | 1 |
| Cambodia                         | Demographic and Health Survey 2010                                                                     | 0 |
|                                  | Demographic and Health Survey 2014                                                                     | 0 |
| Cameroon                         | Demographic and Health Survey 2018                                                                     | 0 |
| Canada                           | Vital Registration data submitted to WHO/UN IGME version 2019                                          | 1 |
|                                  | Vital Registration data submitted to WHO/UN IGME version 2018                                          | 0 |
| Chad                             | HMIS-DHIS2 data submitted to WHO/UN IGME version 2014                                                  | 0 |
| Chile                            | Vital Registration data submitted to WHO/UN IGME version 2014                                          | 1 |
| China                            | Vital Registration data submitted to WHO/UN IGME version 2014                                          | 1 |
|                                  | Zheng 2015                                                                                             | 1 |
|                                  | Zeng 2008                                                                                              | 1 |
|                                  | Xu 2012                                                                                                | 0 |
|                                  | Liu 2013                                                                                               | 0 |
|                                  | Sun 2013                                                                                               | 0 |
|                                  | Qu 2019                                                                                                | 0 |
|                                  | Wang 2016                                                                                              | 0 |
|                                  | Yang 2018                                                                                              | 0 |
|                                  | Zhu 2016                                                                                               | 0 |
|                                  | Zhong                                                                                                  | 0 |
|                                  | Ge 2016                                                                                                | 0 |
|                                  | Wang 2018                                                                                              | 0 |
| Zang 2019                        | 1                                                                                                      |   |
| Colombia                         | Vital Registration data submitted to WHO/UN IGME version 2020                                          | 0 |
|                                  | Encuesta Nacional de Demografía y Salud 2005                                                           | 1 |
|                                  | Encuesta Nacional de Demografía y Salud 2010                                                           | 0 |
|                                  | Encuesta Nacional de Demografía y Salud 2015                                                           | 1 |
| Comoros                          | Deuxième Enquête Démographique, de Santé 2012                                                          | 0 |
| Congo                            | HMIS-DHIS2 data submitted to WHO/UN IGME version 2020                                                  | 0 |
| Cook Islands                     | Vital Registration data submitted to WHO/UN IGME version 2015                                          | 1 |
| Costa Rica                       | Vital Registration data submitted to WHO/UN IGME version 2019                                          | 1 |
| Cote d'Ivoire                    | Waiswa                                                                                                 | 0 |
| Croatia                          | Vital Registration data submitted to WHO/UN IGME version 2014                                          | 1 |
|                                  | Birth or Death Registry                                                                                | 1 |
| Cuba                             | Vital Registration data submitted to WHO/UN IGME version 2020                                          | 1 |
| Cyprus                           | Birth or Death Registry                                                                                | 0 |
|                                  | Vital Registration data submitted to WHO/UN IGME version NA data submitted to WHO/UN IGME version 2019 | 1 |
| Czechia                          | Vital Registration data submitted to WHO/UN IGME version 2020                                          | 1 |
| Democratic Republic of the Congo | Global Network Re-analysed                                                                             | 1 |
|                                  | McClure 2007                                                                                           | 0 |
|                                  | McClure 2011                                                                                           | 0 |
|                                  | Ntambue 2013                                                                                           | 0 |
|                                  | AMANHI 2018                                                                                            | 1 |
| Denmark                          | Vital Registration data submitted to WHO/UN IGME version 2014                                          | 1 |
| Djibouti                         | HMIS-DHIS2 data submitted to WHO/UN IGME version 2014                                                  | 1 |
| Dominican Republic               | Encuesta Demográfica y de Salud 2002                                                                   | 0 |
|                                  | HMIS-DHIS2 data submitted to WHO/UN IGME version 2020                                                  | 0 |
|                                  | McClure 2018                                                                                           | 0 |

|                                                                             |                                                                                                        |   |
|-----------------------------------------------------------------------------|--------------------------------------------------------------------------------------------------------|---|
| Ecuador                                                                     | Vital Registration data submitted to WHO/UN IGME version 2019                                          | 0 |
|                                                                             | Encuesta Nacional de Salud y Nutrición 2012                                                            | 1 |
|                                                                             | Encuesta Demográfica y de Salud Materna e Infantil 2004                                                | 1 |
|                                                                             | Encuesta Nacional de Salud y Nutrición 2018                                                            | 0 |
| Egypt                                                                       | HMIS-DHIS2 data submitted to WHO/UN IGME version 2020                                                  | 0 |
|                                                                             | Demographic and Health Survey 2003                                                                     | 0 |
|                                                                             | Demographic and Health Survey 2005                                                                     | 0 |
|                                                                             | Demographic and Health Survey 2008                                                                     | 0 |
|                                                                             | Demographic and Health Survey 2014                                                                     | 0 |
|                                                                             | Demographic and Health Survey 2015                                                                     | 0 |
| El Salvador                                                                 | Encuesta Nacional de Salud Familiar 2002-03                                                            | 1 |
|                                                                             | Encuesta Nacional de Salud Familiar 2008                                                               | 1 |
|                                                                             | HMIS-DHIS2 data submitted to WHO/UN IGME version 2020 data obtained by active search version 2020      | 0 |
| Equatorial Guinea                                                           | Demographic and Health Survey 2011                                                                     | 0 |
| Estonia                                                                     | Birth or Death Registry                                                                                | 1 |
| Eswatini                                                                    | Multiple Indicator Cluster Survey 2010                                                                 | 1 |
|                                                                             | Demographic and Health Survey 2006-07                                                                  | 1 |
| Ethiopia                                                                    | Demographic and Health Survey 2005                                                                     | 0 |
|                                                                             | Yaya 2014                                                                                              | 0 |
|                                                                             | Demographic and Health Survey 2011                                                                     | 0 |
|                                                                             | Assefa 2012                                                                                            | 0 |
|                                                                             | Andargie 2013                                                                                          | 0 |
|                                                                             | Waiswa                                                                                                 | 0 |
|                                                                             | Yirgu 2016                                                                                             | 0 |
|                                                                             | Demographic and Health Survey 2016                                                                     | 0 |
|                                                                             | HMIS-DHIS2 data submitted to WHO/UN IGME version 2020                                                  | 0 |
|                                                                             | Atnafu 2016                                                                                            | 0 |
| Child Health and Mortality Prevention Surveillance Network (CHAMPS) Program | 0                                                                                                      |   |
| Fiji                                                                        | HMIS-DHIS2 data submitted to WHO/UN IGME version 2015                                                  | 1 |
| Finland                                                                     | Birth or Death Registry                                                                                | 1 |
| France                                                                      | Vital Registration data submitted to WHO/UN IGME version 2014                                          | 1 |
|                                                                             | Birth or Death Registry                                                                                | 1 |
| Gambia                                                                      | Demographic and Health Survey 2013                                                                     | 0 |
|                                                                             | HMIS-DHIS2 data submitted to WHO/UN IGME version 2020                                                  | 0 |
|                                                                             | Waiswa                                                                                                 | 1 |
| Georgia                                                                     | Birth or Death Registry                                                                                | 1 |
|                                                                             | Reproductive Health Survey 2005                                                                        | 1 |
|                                                                             | Vital Registration data submitted to WHO/UN IGME version 2018                                          | 0 |
| Germany                                                                     | Birth or Death Registry                                                                                | 1 |
|                                                                             | Vital Registration data submitted to WHO/UN IGME version NA data submitted to WHO/UN IGME version 2019 | 1 |
| Ghana                                                                       | Demographic and Health Survey 2003                                                                     | 0 |
|                                                                             | Edmond 2008                                                                                            | 0 |
|                                                                             | Kirkwood 2010                                                                                          | 1 |
|                                                                             | Maternal Health Survey 2007                                                                            | 1 |
|                                                                             | Maternal Health Survey 2017                                                                            | 1 |
|                                                                             | Ha 2012                                                                                                | 0 |
|                                                                             | Demographic and Health Survey 2008                                                                     | 0 |
|                                                                             | HMIS-DHIS2 data submitted to WHO/UN IGME version 2018 data obtained by active search version 2018      | 0 |
|                                                                             | Waiswa                                                                                                 | 1 |
|                                                                             | Demographic and Health Survey 2014                                                                     | 0 |
| AMANHI 2018                                                                 | 1                                                                                                      |   |
| Greece                                                                      | Vital Registration data submitted to WHO/UN IGME version 2019                                          | 1 |
| Grenada                                                                     | Vital Registration data submitted to WHO/UN IGME version 2019                                          | 0 |
| Guatemala                                                                   | Vital Registration data submitted to WHO/UN IGME version 2019                                          | 0 |

|                            |                                                                                                   |   |
|----------------------------|---------------------------------------------------------------------------------------------------|---|
|                            | Encuesta Nacional de Salud Materno Infantil 2002                                                  | 1 |
|                            | Encuesta Nacional de Salud Materno Infantil 2008-09                                               | 1 |
|                            | McClure 2011                                                                                      | 0 |
|                            | Global Network Re-analysed                                                                        | 1 |
|                            | Saleem 2018                                                                                       | 0 |
|                            | Saleem 2014                                                                                       | 0 |
|                            | Encuesta Nacional de Salud Materno Infantil 2014-15                                               | 1 |
|                            | McClure 2018                                                                                      | 0 |
| Guinea                     | Enquête démographique et de santé 2005                                                            | 0 |
|                            | HMIS-DHIS2 data submitted to WHO/UN IGME version 2020 data obtained by active search version 2020 | 0 |
|                            | Guinea 2018 Demographic and Health Survey 2018                                                    | 0 |
| Guinea-Bissau              | Kaestrel 2005                                                                                     | 1 |
|                            | Waiswa                                                                                            | 1 |
| Guyana                     | Demographic and Health Survey 2009                                                                | 1 |
| Honduras                   | Encuesta Nacional de Demografía y Salud 2005-06                                                   | 1 |
|                            | HMIS-DHIS2 data submitted to WHO/UN IGME version 2020                                             | 1 |
|                            | Encuesta Nacional de Demografía y Salud 2011-12                                                   | 1 |
| Hungary                    | Vital Registration data submitted to WHO/UN IGME version 2015                                     | 1 |
| Iceland                    | Birth or Death Registry                                                                           | 1 |
| India                      | Baqui 2006                                                                                        | 1 |
|                            | National Family Health Survey 2005-06                                                             | 0 |
|                            | Gupta 2006                                                                                        | 1 |
|                            | McClure 2007                                                                                      | 0 |
|                            | Prost 2013                                                                                        | 1 |
|                            | More 2012                                                                                         | 0 |
|                            | McClure 2011                                                                                      | 0 |
|                            | Bhandari 2012                                                                                     | 0 |
|                            | Kodkany 2015                                                                                      | 0 |
|                            | Vital Registration data submitted to WHO/UN IGME version 2020                                     | 0 |
|                            | HMIS-DHIS2 data submitted to WHO/UN IGME version 2014                                             | 0 |
|                            | Goudar 2013                                                                                       | 0 |
|                            | Tripathy 2016                                                                                     | 0 |
|                            | Global Network Re-analysed                                                                        | 1 |
|                            | McClure 2015                                                                                      | 0 |
|                            | Spector 2012                                                                                      | 0 |
|                            | Saleem 2014                                                                                       | 0 |
|                            | Waiswa                                                                                            | 0 |
|                            | Altijani 2018                                                                                     | 0 |
|                            | Dandona 2017                                                                                      | 1 |
|                            | Reddy 2017                                                                                        | 0 |
|                            | National Family Health Survey 2015-16                                                             | 0 |
|                            | AMANHI 2018                                                                                       | 1 |
|                            | McClure 2018                                                                                      | 0 |
|                            | Dhaded 2018                                                                                       | 0 |
| Indonesia                  | Demographic and Health Survey 2002-03                                                             | 0 |
|                            | Sunawang 2009                                                                                     | 1 |
|                            | Shankar 2008                                                                                      | 1 |
|                            | Demographic and Health Survey 2007                                                                | 1 |
|                            | Burke 2011                                                                                        | 0 |
|                            | Demographic and Health Survey (Special) 2012                                                      | 1 |
|                            | HMIS-DHIS2 data submitted to WHO/UN IGME version 2020                                             | 0 |
|                            | Demographic and Health Survey 2017                                                                | 1 |
| Iran (Islamic Republic of) | Alizadeh 2015                                                                                     | 0 |
|                            | Hadavi 2011                                                                                       | 0 |
| Iraq                       | Vital Registration data submitted to WHO/UN IGME version 2019                                     | 0 |
| Ireland                    | Birth or Death Registry                                                                           | 1 |



|                                  |                                                                                                        |   |
|----------------------------------|--------------------------------------------------------------------------------------------------------|---|
|                                  | Vital Registration data submitted to WHO/UN IGME version NA data submitted to WHO/UN IGME version 2019 | 0 |
| Israel                           | Vital Registration data submitted to WHO/UN IGME version 2014                                          | 1 |
| Italy                            | Vital Registration data submitted to WHO/UN IGME version 2015                                          | 1 |
| Jamaica                          | Vital Registration data submitted to WHO/UN IGME version 2020                                          | 0 |
|                                  | HMIS-DHIS2 data submitted to WHO/UN IGME version 2015                                                  | 1 |
|                                  | Reproductive and Health Survey 2008-09                                                                 | 1 |
| Japan                            | Vital Registration data submitted to WHO/UN IGME version 2020                                          | 1 |
| Jordan                           | Population and Family Health Survey 2002                                                               | 1 |
|                                  | Population and Family Health Survey 2007                                                               | 0 |
|                                  | Population and Family Health Survey 2009                                                               | 1 |
|                                  | Population and Family Health Survey 2012                                                               | 0 |
|                                  | Population and Family Health Survey 2017-18                                                            | 0 |
| Kazakhstan                       | Vital Registration data submitted to WHO/UN IGME version 2014                                          | 1 |
| Kenya                            | Demographic and Health Survey 2003                                                                     | 0 |
|                                  | Demographic and Health Survey 2008-09                                                                  | 0 |
|                                  | McClure 2011                                                                                           | 0 |
|                                  | HMIS-DHIS2 data submitted to WHO/UN IGME version 2020                                                  | 1 |
|                                  | Global Network Re-analysed                                                                             | 1 |
|                                  | McClure 2015                                                                                           | 0 |
|                                  | Saleem 2014                                                                                            | 0 |
|                                  | Waiswa                                                                                                 | 0 |
|                                  | Demographic and Health Survey 2014                                                                     | 0 |
|                                  | Creanga 2016                                                                                           | 0 |
|                                  | AMANHI 2018                                                                                            | 0 |
|                                  | McClure 2018                                                                                           | 0 |
|                                  | Child Health and Mortality Prevention Surveillance Network (CHAMPS) Program                            | 0 |
| Kuwait                           | Vital Registration data submitted to WHO/UN IGME version 2020                                          | 0 |
| Kyrgyzstan                       | Vital Registration data submitted to WHO/UN IGME version 2020                                          | 1 |
|                                  | Demographic and Health Survey 2012                                                                     | 1 |
|                                  | Birth or Death Registry                                                                                | 1 |
| Lao People's Democratic Republic | The Lao Social Indicator Survey LSIS II 2017                                                           | 1 |
| Latvia                           | Birth or Death Registry                                                                                | 1 |
| Lebanon                          | Birth or Death Registry                                                                                | 0 |
| Lesotho                          | Demographic and Health Survey 2004                                                                     | 1 |
|                                  | Demographic and Health Survey 2009                                                                     | 0 |
|                                  | Demographic and Health Survey 2014                                                                     | 1 |
| Liberia                          | Demographic and Health Survey 2013                                                                     | 0 |
|                                  | HMIS-DHIS2 data submitted to WHO/UN IGME version 2019                                                  | 0 |
|                                  | Moseson 2014                                                                                           | 0 |
| Lithuania                        | Vital Registration data submitted to WHO/UN IGME version 2019                                          | 1 |
| Luxembourg                       | Birth or Death Registry                                                                                | 1 |
| Madagascar                       | HMIS-DHIS2 data submitted to WHO/UN IGME version 2020                                                  | 0 |
|                                  | Enquête démographique et de santé 2003-04                                                              | 0 |
|                                  | Enquête démographique et de santé 2008-09                                                              | 1 |
| Malawi                           | Demographic and Health Survey 2004                                                                     | 1 |
|                                  | Prost 2013                                                                                             | 0 |
|                                  | Demographic and Health Survey 2010                                                                     | 0 |
|                                  | Colbourn 2013                                                                                          | 1 |
|                                  | HMIS-DHIS2 data submitted to WHO/UN IGME version 2019                                                  | 1 |
|                                  | Waiswa                                                                                                 | 1 |
|                                  | Ellard 2016                                                                                            | 0 |
|                                  | Demographic and Health Survey 2015-16                                                                  | 0 |
| Malaysia                         | Vital Registration data submitted to WHO/UN IGME version 2020                                          | 1 |
| Maldives                         | Vital Registration data submitted to WHO/UN IGME version 2014                                          | 1 |
|                                  | Demographic and Health Survey 2009                                                                     | 1 |

|                     |                                                                                           |   |
|---------------------|-------------------------------------------------------------------------------------------|---|
|                     | Demographic and Health Survey 2016-17                                                     | 0 |
| Mali                | Enquête démographique et de santé 2006                                                    | 0 |
|                     | HMIS-DHIS2 data submitted to WHO/UN IGME version 2020                                     | 1 |
|                     | Enquête sur la prévalence de l'Anémie et de la Parasitémie palustre chez les enfants 2010 | 0 |
|                     | Enquête Démographique et de Santé 2012-13                                                 | 0 |
|                     | Demographic and Health Survey 2018                                                        | 0 |
|                     | Child Health and Mortality Prevention Surveillance Network (CHAMPS) Program               | 1 |
| Malta               | Vital Registration data submitted to WHO/UN IGME version 2020                             | 1 |
| Mauritius           | Vital Registration data submitted to WHO/UN IGME version 2019                             | 1 |
|                     | HMIS-DHIS2 data submitted to WHO/UN IGME version 2018                                     | 1 |
| Mexico              | Vital Registration data submitted to WHO/UN IGME version 2019                             | 0 |
|                     | Encuesta Nacional de la Dinámica Demográfica 2018                                         | 1 |
|                     | Encuesta Nacional de la Dinámica Demográfica 2014                                         | 1 |
| Republic of Moldova | Vital Registration data submitted to WHO/UN IGME version 2014                             | 0 |
|                     | Birth or Death Registry                                                                   | 0 |
| Monaco              | Vital Registration data submitted to WHO/UN IGME version 2015                             | 0 |
| Mongolia            | HMIS-DHIS2 data submitted to WHO/UN IGME version 2018                                     | 1 |
|                     | Multiple Indicator Cluster Survey 2013-14                                                 | 1 |
| Montenegro          | Vital Registration data submitted to WHO/UN IGME version 2019                             | 1 |
| Morocco             | HMIS-DHIS2 data submitted to WHO/UN IGME version 2014                                     | 0 |
|                     | Enquête sur la population et la santé familiale 2003-04                                   | 1 |
|                     | Enquête sur la population et la santé familiale 2011                                      | 1 |
|                     | Enquête sur la population et la santé familiale 2018                                      | 1 |
| Mozambique          | Inquérito Demográfico e de Saúde 2003                                                     | 1 |
|                     | Demographic and Health Survey 2011                                                        | 0 |
|                     | Sacoor 2018                                                                               | 1 |
|                     | Arnaldo 2018                                                                              | 0 |
|                     | HMIS-DHIS2 data submitted to WHO/UN IGME version 2019                                     | 0 |
|                     | Child Health and Mortality Prevention Surveillance Network (CHAMPS) Program               | 1 |
| Myanmar             | Vital Registration data submitted to WHO/UN IGME version 2020                             | 0 |
|                     | Demographic and Health Survey 2015-16                                                     | 0 |
| Namibia             | Demographic and Health Survey 2006-07                                                     | 0 |
|                     | Demographic and Health Survey 2013                                                        | 0 |
| Nauru               | Birth or Death Registry                                                                   | 0 |
| Nepal               | Prost 2013                                                                                | 0 |
|                     | Osrin 2005                                                                                | 0 |
|                     | Manandhar 2004                                                                            | 1 |
|                     | Demographic and Health Survey 2006                                                        | 1 |
|                     | Demographic and Health Survey 2011                                                        | 0 |
|                     | Lee 2011                                                                                  | 1 |
|                     | Demographic and Health Survey 2016                                                        | 1 |
|                     | Steinhoff 2017                                                                            | 0 |
|                     | Kozuki 2017                                                                               | 0 |
| Netherlands         | Birth or Death Registry                                                                   | 1 |
|                     | Vital Registration data submitted to WHO/UN IGME version 2019                             | 0 |
| New Zealand         | Vital Registration data submitted to WHO/UN IGME version 2014                             | 1 |
| Nicaragua           | Encuesta Nicaragüense de Demografía y Salud 2006                                          | 1 |
|                     | Demographic and Health Survey 2011-12                                                     | 1 |
| Niger               | HMIS-DHIS2 data submitted to WHO/UN IGME version 2014                                     | 0 |
|                     | Enquête démographique et de santé et à indicateurs multiples 2006                         | 0 |
|                     | Zagre 2007                                                                                | 0 |
|                     | Enquête démographique et de santé et à indicateurs multiples 2012                         | 1 |
| Nigeria             | Demographic and Health Survey 2008                                                        | 0 |
|                     | Demographic and Health Survey 2013                                                        | 0 |
|                     | Demographic and Health Survey 2018                                                        | 0 |
| Norway              | Vital Registration data submitted to WHO/UN IGME version 2020                             | 1 |
| Oman                | Birth or Death Registry                                                                   | 0 |

|                                               |                                                                                                   |   |
|-----------------------------------------------|---------------------------------------------------------------------------------------------------|---|
|                                               | Vital Registration data submitted to WHO/UN IGME version 2020                                     | 1 |
| Pakistan                                      | Memon 2015                                                                                        | 0 |
|                                               | Bhutta 2008                                                                                       | 0 |
|                                               | Demographic and Health Survey 2006-07                                                             | 1 |
|                                               | Jehan 2007                                                                                        | 0 |
|                                               | Demographic and Health Survey 2012-13                                                             | 1 |
|                                               | Bhutta 2009                                                                                       | 1 |
|                                               | McClure 2007                                                                                      | 0 |
|                                               | McClure 2011                                                                                      | 0 |
|                                               | Bhutta 2011                                                                                       | 0 |
|                                               | Global Network Re-analysed                                                                        | 1 |
|                                               | Saleem 2018                                                                                       | 0 |
|                                               | Saleem 2014                                                                                       | 0 |
|                                               | HMIS-DHIS2 data submitted to WHO/UN IGME version 2020 data obtained by active search version 2020 | 0 |
|                                               | AMANHI 2018                                                                                       | 1 |
|                                               | McClure 2018                                                                                      | 0 |
| Demographic and Health Survey 2017-18         | 1                                                                                                 |   |
| Panama                                        | Vital Registration data submitted to WHO/UN IGME version 2015                                     | 0 |
| Papua New Guinea                              | HMIS-DHIS2 data submitted to WHO/UN IGME version 2020                                             | 0 |
| Paraguay                                      | Vital Registration data submitted to WHO/UN IGME version 2020                                     | 0 |
|                                               | Encuesta Nacional de Demografía y Salud Sexual y Reproductiva 2004                                | 1 |
|                                               | Encuesta Nacional de Demografía y Salud Sexual y Reproductiva 2008                                | 1 |
| Peru                                          | Demographic and Health Survey 2004-08                                                             | 1 |
|                                               | Encuesta Demográfica y de Salud Familiar 2007-08                                                  | 1 |
|                                               | Gonzales 2007                                                                                     | 0 |
|                                               | Encuesta Demográfica y de Salud Familiar 2009                                                     | 1 |
|                                               | Encuesta Demográfica y de Salud Familiar 2010                                                     | 1 |
|                                               | Encuesta Demográfica y de Salud Familiar 2011                                                     | 1 |
|                                               | Encuesta Demográfica y de Salud Familiar 2012                                                     | 1 |
|                                               | Encuesta Demográfica y de Salud Familiar 2013                                                     | 1 |
|                                               | Encuesta Demográfica y de Salud Familiar 2014                                                     | 1 |
|                                               | Demographic and Health Survey (Continuous) 2017                                                   | 1 |
|                                               | Demographic and Health Survey (Continuous) 2018                                                   | 1 |
| Encuesta Demográfica y de Salud Familiar 2019 | 1                                                                                                 |   |
| Philippines                                   | Vital Registration data submitted to WHO/UN IGME version 2014                                     | 0 |
|                                               | National Demographic and Health Survey 2003                                                       | 1 |
|                                               | National Demographic and Health Survey 2013                                                       | 1 |
|                                               | National Demographic and Health Survey 2008                                                       | 1 |
|                                               | Demographic and Health Survey 2017                                                                | 1 |
| Poland                                        | Birth or Death Registry                                                                           | 1 |
|                                               | Vital Registration data submitted to WHO/UN IGME version 2019                                     | 1 |
| Portugal                                      | Vital Registration data submitted to WHO/UN IGME version 2019                                     | 1 |
| Qatar                                         | Vital Registration data submitted to WHO/UN IGME version 2015                                     | 1 |
| Republic of Korea                             | Vital Registration data submitted to WHO/UN IGME version 2020                                     | 1 |
|                                               | Demographic and Health Survey 2005                                                                | 1 |
| Romania                                       | Vital Registration data submitted to WHO/UN IGME version 2020                                     | 1 |
| Russian Federation                            | Vital Registration data submitted to WHO/UN IGME version 2020                                     | 1 |
| Rwanda                                        | Enquête démographique et de santé 2005                                                            | 0 |
|                                               | HMIS-DHIS2 data submitted to WHO/UN IGME version 2014                                             | 1 |
|                                               | Demographic and Health Survey 2010                                                                | 1 |
|                                               | Demographic and Health Survey 2014-15                                                             | 1 |
| Saint Lucia                                   | Vital Registration data submitted to WHO/UN IGME version 2020                                     | 1 |
| Saint Vincent and the Grenadines              | Vital Registration data submitted to WHO/UN IGME version 2020                                     | 1 |
| San Marino                                    | Vital Registration data submitted to WHO/UN IGME version 2015                                     | 1 |
| Sao Tome and Principe                         | Demographic and Health Survey 2008-09                                                             | 0 |

|                                |                                                                                                        |   |
|--------------------------------|--------------------------------------------------------------------------------------------------------|---|
| Saudi Arabia                   | HMIS-DHIS2 data submitted to WHO/UN IGME version 2014                                                  | 0 |
|                                | Khashoggi 2005                                                                                         | 0 |
| Senegal                        | Enquête démographique et de santé 2005                                                                 | 1 |
|                                | HMIS-DHIS2 data submitted to WHO/UN IGME version 2014                                                  | 1 |
|                                | Enquête démographique et de santé à indicateurs multiples 2010-11                                      | 1 |
|                                | Enquête Démographique et de Santé Continue 2012-13                                                     | 1 |
|                                | Enquête Démographique et de Santé Continue 2014                                                        | 1 |
|                                | Enquête Démographique et de Santé Continue 2015                                                        | 1 |
|                                | Enquête Démographique et de Santé Continue 2016                                                        | 1 |
|                                | Enquête Démographique et de Santé Continue 2017                                                        | 1 |
| Demographic Health Survey 2018 | 1                                                                                                      |   |
| Serbia                         | Vital Registration data submitted to WHO/UN IGME version 2019                                          | 1 |
| Seychelles                     | Vital Registration data submitted to WHO/UN IGME version 2014                                          | 1 |
| Sierra Leone                   | Demographic and Health Survey 2008                                                                     | 0 |
|                                | Demographic and Health Survey 2013                                                                     | 0 |
|                                | Demographic and Health Survey 2019                                                                     | 0 |
| Singapore                      | Vital Registration data submitted to WHO/UN IGME version 2020                                          | 1 |
| Slovakia                       | Vital Registration data submitted to WHO/UN IGME version 2019                                          | 1 |
| Slovenia                       | Birth or Death Registry                                                                                | 1 |
|                                | Vital Registration data submitted to WHO/UN IGME version NA data submitted to WHO/UN IGME version 2019 | 0 |
| South Africa                   | Vital Registration data submitted to WHO/UN IGME version 2014                                          | 0 |
|                                | HMIS-DHIS2 data submitted to WHO/UN IGME version 2014                                                  | 1 |
|                                | Waiswa                                                                                                 | 1 |
|                                | Lavin 2018                                                                                             | 0 |
|                                | Demographic and Health Survey 2016                                                                     | 0 |
| Spain                          | Vital Registration data submitted to WHO/UN IGME version 2015                                          | 1 |
| Sri Lanka                      | Vital Registration data submitted to WHO/UN IGME version 2014                                          | 0 |
|                                | Demographic and Health Survey 2006-07                                                                  | 1 |
|                                | HMIS-DHIS2 data submitted to WHO/UN IGME version 2019                                                  | 1 |
| State of Palestine             | HMIS-DHIS2 data submitted to WHO/UN IGME version 2014                                                  | 0 |
| Sudan                          | HMIS-DHIS2 data submitted to WHO/UN IGME version 2014                                                  | 0 |
|                                | Ali 2014                                                                                               | 1 |
| Suriname                       | Vital Registration data submitted to WHO/UN IGME version 2014                                          | 0 |
|                                | HMIS-DHIS2 data submitted to WHO/UN IGME version 2014                                                  | 0 |
| Sweden                         | Birth or Death Registry                                                                                | 1 |
|                                | Vital Registration data submitted to WHO/UN IGME version NA data submitted to WHO/UN IGME version 2019 | 0 |
| Switzerland                    | Vital Registration data submitted to WHO/UN IGME version 2018                                          | 1 |
| Tajikistan                     | Demographic and Health Survey 2017                                                                     | 0 |
|                                | Demographic and Health Survey 2012                                                                     | 0 |
|                                | Vital Registration data submitted to WHO/UN IGME version 2020                                          | 0 |
| United Republic of Tanzania    | Kilonzo 2001                                                                                           | 1 |
|                                | HMIS-DHIS2 data submitted to WHO/UN IGME version 2020 data obtained by active search version 2020      | 0 |
|                                | Waiswa                                                                                                 | 1 |
|                                | Mosha 2014                                                                                             | 1 |
|                                | AMANHI 2018                                                                                            | 1 |
| Northern Macedonia             | Vital Registration data submitted to WHO/UN IGME version 2014                                          | 1 |
| Thailand                       | Mo-suwan 2009                                                                                          | 0 |
| Timor-Leste                    | Demographic and Health Survey 2009-10                                                                  | 0 |
|                                | Demographic and Health Survey 2016                                                                     | 0 |
|                                | HMIS-DHIS2 data submitted to WHO/UN IGME version 2020                                                  | 0 |
| Togo                           | HMIS-DHIS2 data submitted to WHO/UN IGME version 2014                                                  | 0 |
| Trinidad and Tobago            | Vital Registration data submitted to WHO/UN IGME version 2019                                          | 0 |
|                                | HMIS-DHIS2 data submitted to WHO/UN IGME version 2018 data obtained by active search version 2018      | 1 |
| Tunisia                        | Vital Registration data submitted to WHO/UN IGME version 2015                                          | 0 |

|                                    |                                                               |   |
|------------------------------------|---------------------------------------------------------------|---|
|                                    | HMIS-DHIS2 data submitted to WHO/UN IGME version 2020         | 1 |
| Turkey                             | Demographic and Health Survey 2003                            | 1 |
|                                    | Demographic and Health Survey 2008                            | 1 |
|                                    | Arslan 2013                                                   | 0 |
|                                    | Vital Registration data submitted to WHO/UN IGME version 2019 | 1 |
|                                    | HMIS-DHIS2 data submitted to WHO/UN IGME version 2018         | 1 |
|                                    | Demographic and Health Survey 2013                            | 1 |
| Turkmenistan                       | Vital Registration data submitted to WHO/UN IGME version 2014 | 0 |
| United Arab Emirates               | Vital Registration data submitted to WHO/UN IGME version 2020 | 1 |
| Uganda                             | Kujala 2017                                                   | 1 |
|                                    | Asiki 2015                                                    | 1 |
|                                    | Demographic and Health Survey 2006                            | 1 |
|                                    | Ndyomugenyi 2011                                              | 1 |
|                                    | Nankabirwa 2011                                               | 1 |
|                                    | Demographic and Health Survey 2011                            | 1 |
|                                    | HMIS-DHIS2 data submitted to WHO/UN IGME version 2020         | 1 |
|                                    | Kananura 2017                                                 | 0 |
|                                    | Uganda Demographic and Health Survey 2016                     | 1 |
| Ukraine                            | Vital Registration data submitted to WHO/UN IGME version 2020 | 1 |
|                                    | Demographic and Health Survey 2007                            | 1 |
|                                    | Multiple Indicator Cluster Survey 2012                        | 0 |
| United Kingdom                     | Vital Registration data submitted to WHO/UN IGME version 2019 | 1 |
|                                    | Demographic and Health Survey 2004-05                         | 1 |
|                                    | Demographic and Health Survey 2010                            | 1 |
|                                    | Demographic and Health Survey 2015-16                         | 1 |
| United States of America           | Vital Registration data submitted to WHO/UN IGME version 2014 | 1 |
| Uruguay                            | Vital Registration data submitted to WHO/UN IGME version 2020 | 1 |
| Uzbekistan                         | Vital Registration data submitted to WHO/UN IGME version 2014 | 0 |
| Venezuela (Bolivarian Republic of) | Vital Registration data submitted to WHO/UN IGME version 2015 | 0 |
| Viet Nam                           | Demographic and Health Survey 2002                            | 0 |
|                                    | Graner 2009                                                   | 0 |
|                                    | Persson 2013                                                  | 1 |
| Yemen                              | National Health and Demographic Survey 2013                   | 1 |
|                                    | Al-Shahethi 2018                                              | 1 |
| Zambia                             | Demographic and Health Survey 2007                            | 0 |
|                                    | McClure 2007                                                  | 0 |
|                                    | Stringer 2011                                                 | 0 |
|                                    | McClure 2011                                                  | 0 |
|                                    | Gill 2011                                                     | 1 |
|                                    | Turnbull 2011                                                 | 1 |
|                                    | Chi 2011                                                      | 1 |
|                                    | Stringer 2015                                                 | 0 |
|                                    | Global Network Re-analysed                                    | 1 |
|                                    | McClure 2015                                                  | 0 |
|                                    | Saleem 2014                                                   | 0 |
|                                    | Demographic and Health Survey 2013-14                         | 1 |
|                                    | AMANHI 2018                                                   | 1 |
|                                    | McClure 2018                                                  | 0 |
|                                    | Demographic and Health Survey 2018                            | 0 |
| Zimbabwe                           | Demographic and Health Survey 2005-06                         | 0 |
|                                    | HMIS-DHIS2 data submitted to WHO/UN IGME version 2020         | 1 |
|                                    | Demographic and Health Survey 2010-11                         | 0 |
|                                    | Tachiweyika 2011                                              | 1 |
|                                    | Demographic and Health Survey 2015                            | 0 |

Table A9: Data availability and inclusion by country and data source type

| Country Name                     | Included quality data category | Total Datapoints |                                | Administrative datapoints |                                | HMIS datapoints |                                | Household survey datapoints |                                | Population based study datapoints |                                |
|----------------------------------|--------------------------------|------------------|--------------------------------|---------------------------|--------------------------------|-----------------|--------------------------------|-----------------------------|--------------------------------|-----------------------------------|--------------------------------|
|                                  |                                | All              | Included quality data in model | All                       | Included quality data in model | All             | Included quality data in model | All                         | Included quality data in model | All                               | Included quality data in model |
| Albania                          | No Data                        | 11               | 0                              | 0                         | 0                              | 4               | 0                              | 7                           | 0                              | 0                                 | 0                              |
| Algeria                          | >=5 to 10                      | 10               | 8                              | 7                         | 7                              | 1               | 1                              | 2                           | 0                              | 0                                 | 0                              |
| Andorra                          | >=10                           | 19               | 18                             | 19                        | 18                             | 0               | 0                              | 0                           | 0                              | 0                                 | 0                              |
| Angola                           | >=10                           | 19               | 19                             | 19                        | 19                             | 0               | 0                              | 0                           | 0                              | 0                                 | 0                              |
| Antigua and Barbuda              | No Data                        | 1                | 0                              | 0                         | 0                              | 0               | 0                              | 1                           | 0                              | 0                                 | 0                              |
| Argentina                        | No Data                        | 0                | 0                              | 0                         | 0                              | 0               | 0                              | 0                           | 0                              | 0                                 | 0                              |
| Armenia                          | >=10                           | 19               | 19                             | 19                        | 19                             | 0               | 0                              | 0                           | 0                              | 0                                 | 0                              |
| Australia                        | >=5 to 10                      | 28               | 9                              | 19                        | 9                              | 0               | 0                              | 9                           | 0                              | 0                                 | 0                              |
| Austria                          | >=10                           | 21               | 13                             | 21                        | 13                             | 0               | 0                              | 0                           | 0                              | 0                                 | 0                              |
| Azerbaijan                       | >=10                           | 21               | 19                             | 21                        | 19                             | 0               | 0                              | 0                           | 0                              | 0                                 | 0                              |
| Bahamas                          | <5                             | 18               | 1                              | 16                        | 0                              | 0               | 0                              | 2                           | 1                              | 0                                 | 0                              |
| Bahrain                          | >=10                           | 19               | 19                             | 19                        | 19                             | 0               | 0                              | 0                           | 0                              | 0                                 | 0                              |
| Bangladesh                       | >=10                           | 20               | 20                             | 0                         | 0                              | 20              | 20                             | 0                           | 0                              | 0                                 | 0                              |
| Barbados                         | >=10                           | 40               | 22                             | 2                         | 0                              | 9               | 0                              | 4                           | 4                              | 25                                | 18                             |
| Belarus                          | No Data                        | 0                | 0                              | 0                         | 0                              | 0               | 0                              | 0                           | 0                              | 0                                 | 0                              |
| Belgium                          | >=10                           | 19               | 13                             | 19                        | 13                             | 0               | 0                              | 0                           | 0                              | 0                                 | 0                              |
| Belize                           | >=10                           | 19               | 17                             | 19                        | 17                             | 0               | 0                              | 0                           | 0                              | 0                                 | 0                              |
| Benin                            | >=10                           | 12               | 11                             | 12                        | 11                             | 0               | 0                              | 0                           | 0                              | 0                                 | 0                              |
| Bhutan                           | >=5 to 10                      | 11               | 7                              | 0                         | 0                              | 8               | 7                              | 3                           | 0                              | 0                                 | 0                              |
| Bolivia (Plurinational State of) | <5                             | 1                | 1                              | 0                         | 0                              | 1               | 1                              | 0                           | 0                              | 0                                 | 0                              |
| Bosnia and Herzegovina           | <5                             | 3                | 1                              | 0                         | 0                              | 0               | 0                              | 3                           | 1                              | 0                                 | 0                              |
| Botswana                         | >=10                           | 15               | 14                             | 14                        | 14                             | 0               | 0                              | 0                           | 0                              | 1                                 | 0                              |
| Brazil                           | >=5 to 10                      | 13               | 7                              | 7                         | 1                              | 6               | 6                              | 0                           | 0                              | 0                                 | 0                              |
| Brunei Darussalam                | >=10                           | 12               | 17                             | 18                        | 0                              | 36              | 17                             | 0                           | 0                              | 74                                | 0                              |
| Bulgaria                         | >=10                           | 19               | 19                             | 19                        | 19                             | 0               | 0                              | 0                           | 0                              | 0                                 | 0                              |
| Burkina Faso                     | >=10                           | 20               | 20                             | 20                        | 20                             | 0               | 0                              | 0                           | 0                              | 0                                 | 0                              |
| Burundi                          | >=5 to 10                      | 13               | 9                              | 0                         | 0                              | 10              | 9                              | 2                           | 0                              | 1                                 | 0                              |
| Cambodia                         | <5                             | 5                | 4                              | 0                         | 0                              | 3               | 2                              | 2                           | 2                              | 0                                 | 0                              |
| Cameroon                         | No Data                        | 2                | 0                              | 0                         | 0                              | 0               | 0                              | 2                           | 0                              | 0                                 | 0                              |
| Canada                           | No Data                        | 1                | 0                              | 0                         | 0                              | 0               | 0                              | 1                           | 0                              | 0                                 | 0                              |
| Cabo Verde                       | >=10                           | 19               | 19                             | 19                        | 19                             | 0               | 0                              | 0                           | 0                              | 0                                 | 0                              |
| Central African Republic         | <5                             | 2                | 1                              | 1                         | 0                              | 0               | 0                              | 1                           | 1                              | 0                                 | 0                              |
| Chad                             | No Data                        | 0                | 0                              | 0                         | 0                              | 0               | 0                              | 0                           | 0                              | 0                                 | 0                              |
| Chile                            | No Data                        | 1                | 0                              | 0                         | 0                              | 1               | 0                              | 0                           | 0                              | 0                                 | 0                              |
| China                            | >=10                           | 17               | 11                             | 17                        | 11                             | 0               | 0                              | 0                           | 0                              | 0                                 | 0                              |
| Colombia                         | >=10                           | 23               | 11                             | 8                         | 8                              | 0               | 0                              | 0                           | 0                              | 15                                | 3                              |
| Comoros                          | <5                             | 23               | 2                              | 20                        | 0                              | 0               | 0                              | 3                           | 2                              | 0                                 | 0                              |
| Congo                            | No Data                        | 1                | 0                              | 0                         | 0                              | 0               | 0                              | 1                           | 0                              | 0                                 | 0                              |
| Democratic Republic of the Congo | No Data                        | 4                | 0                              | 0                         | 0                              | 4               | 0                              | 0                           | 0                              | 0                                 | 0                              |
| Cook Islands                     | >=5 to 10                      | 10               | 6                              | 0                         | 0                              | 0               | 0                              | 0                           | 0                              | 10                                | 6                              |
| Costa Rica                       | >=10                           | 17               | 17                             | 17                        | 17                             | 0               | 0                              | 0                           | 0                              | 0                                 | 0                              |
| Cote d'Ivoire                    | >=10                           | 19               | 19                             | 19                        | 19                             | 0               | 0                              | 0                           | 0                              | 0                                 | 0                              |

|                                       |           |    |    |    |    |    |    |   |   |    |    |
|---------------------------------------|-----------|----|----|----|----|----|----|---|---|----|----|
| Croatia                               | No Data   | 1  | 0  | 0  | 0  | 0  | 0  | 0 | 0 | 1  | 0  |
| Cuba                                  | >=10      | 20 | 18 | 20 | 18 | 0  | 0  | 0 | 0 | 0  | 0  |
| Cyprus                                | >=10      | 20 | 20 | 20 | 20 | 0  | 0  | 0 | 0 | 0  | 0  |
| Czechia                               | >=5 to 10 | 13 | 7  | 13 | 7  | 0  | 0  | 0 | 0 | 0  | 0  |
| Denmark                               | >=10      | 20 | 20 | 20 | 20 | 0  | 0  | 0 | 0 | 0  | 0  |
| Djibouti                              | >=10      | 18 | 17 | 18 | 17 | 0  | 0  | 0 | 0 | 0  | 0  |
| Dominica                              | <5        | 2  | 1  | 0  | 0  | 2  | 1  | 0 | 0 | 0  | 0  |
| Dominican Republic                    | No Data   | 0  | 0  | 0  | 0  | 0  | 0  | 0 | 0 | 0  | 0  |
| Ecuador                               | No Data   | 8  | 0  | 0  | 0  | 7  | 0  | 1 | 0 | 0  | 0  |
| Egypt                                 | <5        | 24 | 2  | 18 | 0  | 0  | 0  | 6 | 2 | 0  | 0  |
| El Salvador                           | No Data   | 23 | 0  | 0  | 0  | 18 | 0  | 5 | 0 | 0  | 0  |
| Equatorial Guinea                     | <5        | 17 | 2  | 0  | 0  | 14 | 0  | 3 | 2 | 0  | 0  |
| Eritrea                               | No Data   | 1  | 0  | 0  | 0  | 0  | 0  | 1 | 0 | 0  | 0  |
| Estonia                               | No Data   | 0  | 0  | 0  | 0  | 0  | 0  | 0 | 0 | 0  | 0  |
| Ethiopia                              | >=10      | 20 | 20 | 20 | 20 | 0  | 0  | 0 | 0 | 0  | 0  |
| Micronesia (Federated States of)      | No Data   | 21 | 0  | 0  | 0  | 6  | 0  | 3 | 0 | 12 | 0  |
| Fiji                                  | No Data   | 0  | 0  | 0  | 0  | 0  | 0  | 0 | 0 | 0  | 0  |
| Finland                               | >=10      | 11 | 11 | 0  | 0  | 11 | 11 | 0 | 0 | 0  | 0  |
| France                                | >=10      | 19 | 19 | 19 | 19 | 0  | 0  | 0 | 0 | 0  | 0  |
| Gabon                                 | >=5 to 10 | 16 | 7  | 16 | 7  | 0  | 0  | 0 | 0 | 0  | 0  |
| Gambia                                | No Data   | 0  | 0  | 0  | 0  | 0  | 0  | 0 | 0 | 0  | 0  |
| Georgia                               | <5        | 11 | 1  | 0  | 0  | 9  | 0  | 1 | 0 | 1  | 1  |
| Germany                               | >=10      | 28 | 12 | 27 | 11 | 0  | 0  | 1 | 1 | 0  | 0  |
| Ghana                                 | >=10      | 21 | 18 | 21 | 18 | 0  | 0  | 0 | 0 | 0  | 0  |
| Greece                                | >=5 to 10 | 17 | 5  | 0  | 0  | 5  | 0  | 7 | 2 | 5  | 3  |
| Grenada                               | >=10      | 19 | 19 | 19 | 19 | 0  | 0  | 0 | 0 | 0  | 0  |
| Guatemala                             | No Data   | 3  | 0  | 3  | 0  | 0  | 0  | 0 | 0 | 0  | 0  |
| Guinea                                | >=10      | 40 | 12 | 18 | 0  | 0  | 0  | 3 | 3 | 19 | 9  |
| Guinea-Bissau                         | No Data   | 12 | 0  | 0  | 0  | 10 | 0  | 2 | 0 | 0  | 0  |
| Guyana                                | <5        | 2  | 2  | 0  | 0  | 0  | 0  | 0 | 0 | 2  | 2  |
| Haiti                                 | <5        | 1  | 1  | 0  | 0  | 0  | 0  | 1 | 1 | 0  | 0  |
| Honduras                              | No Data   | 0  | 0  | 0  | 0  | 0  | 0  | 0 | 0 | 0  | 0  |
| Hungary                               | >=5 to 10 | 13 | 6  | 0  | 0  | 11 | 4  | 2 | 2 | 0  | 0  |
| Iceland                               | >=10      | 17 | 16 | 17 | 16 | 0  | 0  | 0 | 0 | 0  | 0  |
| India                                 | >=10      | 20 | 20 | 20 | 20 | 0  | 0  | 0 | 0 | 0  | 0  |
| Indonesia                             | >=10      | 89 | 20 | 10 | 0  | 11 | 0  | 2 | 0 | 66 | 20 |
| Iran (Islamic Republic of)            | >=5 to 10 | 13 | 5  | 0  | 0  | 6  | 0  | 4 | 3 | 3  | 2  |
| Iraq                                  | No Data   | 3  | 0  | 0  | 0  | 0  | 0  | 0 | 0 | 3  | 0  |
| Ireland                               | No Data   | 18 | 0  | 18 | 0  | 0  | 0  | 0 | 0 | 0  | 0  |
| Israel                                | >=10      | 20 | 18 | 20 | 18 | 0  | 0  | 0 | 0 | 0  | 0  |
| Italy                                 | >=10      | 17 | 17 | 17 | 17 | 0  | 0  | 0 | 0 | 0  | 0  |
| Jamaica                               | >=10      | 18 | 18 | 18 | 18 | 0  | 0  | 0 | 0 | 0  | 0  |
| Japan                                 | >=10      | 29 | 10 | 18 | 0  | 10 | 9  | 1 | 1 | 0  | 0  |
| Jordan                                | >=10      | 19 | 19 | 19 | 19 | 0  | 0  | 0 | 0 | 0  | 0  |
| Kazakhstan                            | <5        | 5  | 2  | 0  | 0  | 0  | 0  | 5 | 2 | 0  | 0  |
| Kenya                                 | >=5 to 10 | 16 | 8  | 16 | 8  | 0  | 0  | 0 | 0 | 0  | 0  |
| Kiribati                              | >=5 to 10 | 36 | 9  | 0  | 0  | 11 | 2  | 3 | 0 | 22 | 7  |
| Democratic People's Republic of Korea | No Data   | 0  | 0  | 0  | 0  | 0  | 0  | 0 | 0 | 0  | 0  |
| Republic of Korea                     | No Data   | 0  | 0  | 0  | 0  | 0  | 0  | 0 | 0 | 0  | 0  |
| Kuwait                                | >=10      | 10 | 10 | 10 | 10 | 0  | 0  | 0 | 0 | 0  | 0  |
| Kyrgyzstan                            | No Data   | 19 | 0  | 19 | 0  | 0  | 0  | 0 | 0 | 0  | 0  |
| Lao People's Democratic Republic      | >=5 to 10 | 26 | 7  | 23 | 6  | 0  | 0  | 3 | 1 | 0  | 0  |
| Latvia                                | <5        | 1  | 1  | 0  | 0  | 0  | 0  | 1 | 1 | 0  | 0  |
| Lebanon                               | >=10      | 19 | 19 | 19 | 19 | 0  | 0  | 0 | 0 | 0  | 0  |

|                       |           |    |    |    |    |    |    |    |    |    |    |
|-----------------------|-----------|----|----|----|----|----|----|----|----|----|----|
| Lesotho               | No Data   | 7  | 0  | 7  | 0  | 0  | 0  | 0  | 0  | 0  | 0  |
| Liberia               | <5        | 3  | 2  | 0  | 0  | 0  | 0  | 3  | 2  | 0  | 0  |
| Libya                 | No Data   | 10 | 0  | 0  | 0  | 8  | 0  | 1  | 0  | 1  | 0  |
| Lithuania             | No Data   | 0  | 0  | 0  | 0  | 0  | 0  | 0  | 0  | 0  | 0  |
| Luxembourg            | >=5 to 10 | 19 | 9  | 19 | 9  | 0  | 0  | 0  | 0  | 0  | 0  |
| Northern Macedonia    | >=10      | 17 | 16 | 17 | 16 | 0  | 0  | 0  | 0  | 0  | 0  |
| Madagascar            | >=10      | 19 | 19 | 19 | 19 | 0  | 0  | 0  | 0  | 0  | 0  |
| Malawi                | <5        | 21 | 1  | 0  | 0  | 19 | 0  | 2  | 1  | 0  | 0  |
| Malaysia              | >=5 to 10 | 17 | 8  | 0  | 0  | 8  | 5  | 3  | 1  | 6  | 2  |
| Maldives              | >=10      | 19 | 11 | 19 | 11 | 0  | 0  | 0  | 0  | 0  | 0  |
| Mali                  | >=10      | 17 | 10 | 15 | 9  | 0  | 0  | 2  | 1  | 0  | 0  |
| Malta                 | >=5 to 10 | 21 | 5  | 0  | 0  | 13 | 3  | 4  | 0  | 4  | 2  |
| Marshall Islands      | >=10      | 19 | 19 | 19 | 19 | 0  | 0  | 0  | 0  | 0  | 0  |
| Mauritania            | No Data   | 0  | 0  | 0  | 0  | 0  | 0  | 0  | 0  | 0  | 0  |
| Mauritius             | No Data   | 0  | 0  | 0  | 0  | 0  | 0  | 0  | 0  | 0  | 0  |
| Mexico                | >=10      | 26 | 26 | 20 | 20 | 6  | 6  | 0  | 0  | 0  | 0  |
| Republic of Moldova   | <5        | 26 | 2  | 19 | 0  | 0  | 0  | 7  | 2  | 0  | 0  |
| Monaco                | <5        | 21 | 1  | 19 | 0  | 0  | 0  | 2  | 1  | 0  | 0  |
| Mongolia              | No Data   | 3  | 0  | 3  | 0  | 0  | 0  | 0  | 0  | 0  | 0  |
| Montenegro            | >=10      | 16 | 13 | 0  | 0  | 15 | 12 | 1  | 1  | 0  | 0  |
| Morocco               | >=10      | 19 | 18 | 19 | 18 | 0  | 0  | 0  | 0  | 0  | 0  |
| Mozambique            | <5        | 20 | 3  | 0  | 0  | 17 | 0  | 3  | 3  | 0  | 0  |
| Myanmar               | <5        | 8  | 4  | 0  | 0  | 2  | 0  | 2  | 1  | 4  | 3  |
| Namibia               | No Data   | 6  | 0  | 5  | 0  | 0  | 0  | 1  | 0  | 0  | 0  |
| Nauru                 | No Data   | 2  | 0  | 0  | 0  | 0  | 0  | 2  | 0  | 0  | 0  |
| Nepal                 | No Data   | 5  | 0  | 5  | 0  | 0  | 0  | 0  | 0  | 0  | 0  |
| Netherlands           | <5        | 15 | 4  | 0  | 0  | 0  | 0  | 9  | 2  | 6  | 2  |
| New Zealand           | >=10      | 32 | 16 | 32 | 16 | 0  | 0  | 0  | 0  | 0  | 0  |
| Nicaragua             | >=10      | 16 | 16 | 16 | 16 | 0  | 0  | 0  | 0  | 0  | 0  |
| Niger                 | <5        | 3  | 2  | 0  | 0  | 0  | 0  | 3  | 2  | 0  | 0  |
| Nigeria               | <5        | 15 | 1  | 0  | 0  | 12 | 0  | 2  | 1  | 1  | 0  |
| Niue                  | No Data   | 3  | 0  | 0  | 0  | 0  | 0  | 3  | 0  | 0  | 0  |
| Norway                | No Data   | 0  | 0  | 0  | 0  | 0  | 0  | 0  | 0  | 0  | 0  |
| Oman                  | >=10      | 19 | 19 | 19 | 19 | 0  | 0  | 0  | 0  | 0  | 0  |
| Pakistan              | >=10      | 13 | 12 | 13 | 12 | 0  | 0  | 0  | 0  | 0  | 0  |
| Palau                 | >=10      | 38 | 15 | 0  | 0  | 6  | 0  | 5  | 3  | 27 | 12 |
| Panama                | No Data   | 0  | 0  | 0  | 0  | 0  | 0  | 0  | 0  | 0  | 0  |
| Papua New Guinea      | No Data   | 19 | 0  | 19 | 0  | 0  | 0  | 0  | 0  | 0  | 0  |
| Paraguay              | No Data   | 10 | 0  | 0  | 0  | 10 | 0  | 0  | 0  | 0  | 0  |
| Peru                  | <5        | 20 | 2  | 18 | 0  | 0  | 0  | 2  | 2  | 0  | 0  |
| Philippines           | >=10      | 12 | 11 | 0  | 0  | 0  | 0  | 11 | 11 | 1  | 0  |
| Poland                | <5        | 25 | 4  | 15 | 0  | 0  | 0  | 10 | 4  | 0  | 0  |
| Portugal              | >=10      | 22 | 20 | 22 | 20 | 0  | 0  | 0  | 0  | 0  | 0  |
| Qatar                 | >=10      | 20 | 20 | 20 | 20 | 0  | 0  | 0  | 0  | 0  | 0  |
| Romania               | >=10      | 12 | 12 | 12 | 12 | 0  | 0  | 0  | 0  | 0  | 0  |
| Russian Federation    | >=10      | 19 | 14 | 19 | 14 | 0  | 0  | 0  | 0  | 0  | 0  |
| Rwanda                | >=10      | 22 | 20 | 22 | 20 | 0  | 0  | 0  | 0  | 0  | 0  |
| Saint Kitts and Nevis | >=5 to 10 | 12 | 8  | 0  | 0  | 9  | 6  | 3  | 2  | 0  | 0  |
| Saint Lucia           | No Data   | 0  | 0  | 0  | 0  | 0  | 0  | 0  | 0  | 0  | 0  |
| Samoa                 | >=10      | 20 | 17 | 20 | 17 | 0  | 0  | 0  | 0  | 0  | 0  |
| San Marino            | No Data   | 0  | 0  | 0  | 0  | 0  | 0  | 0  | 0  | 0  | 0  |
| Sao Tome and Principe | >=5 to 10 | 7  | 7  | 7  | 7  | 0  | 0  | 0  | 0  | 0  | 0  |
| Saudi Arabia          | No Data   | 1  | 0  | 0  | 0  | 0  | 0  | 1  | 0  | 0  | 0  |
| Senegal               | No Data   | 16 | 0  | 0  | 0  | 15 | 0  | 0  | 0  | 1  | 0  |
| Serbia                | >=10      | 24 | 12 | 0  | 0  | 16 | 4  | 8  | 8  | 0  | 0  |
| Seychelles            | >=10      | 19 | 19 | 19 | 19 | 0  | 0  | 0  | 0  | 0  | 0  |
| Sierra Leone          | >=10      | 15 | 15 | 15 | 15 | 0  | 0  | 0  | 0  | 0  | 0  |
| Singapore             | No Data   | 3  | 0  | 0  | 0  | 0  | 0  | 3  | 0  | 0  | 0  |



|                                    |           |    |    |    |    |    |    |   |   |    |    |
|------------------------------------|-----------|----|----|----|----|----|----|---|---|----|----|
| Slovakia                           | >=10      | 19 | 12 | 19 | 12 | 0  | 0  | 0 | 0 | 0  | 0  |
| Slovenia                           | >=10      | 21 | 20 | 21 | 20 | 0  | 0  | 0 | 0 | 0  | 0  |
| Solomon Islands                    | >=10      | 19 | 18 | 19 | 18 | 0  | 0  | 0 | 0 | 0  | 0  |
| Somalia                            | No Data   | 0  | 0  | 0  | 0  | 0  | 0  | 0 | 0 | 0  | 0  |
| South Africa                       | No Data   | 0  | 0  | 0  | 0  | 0  | 0  | 0 | 0 | 0  | 0  |
| South Sudan                        | >=5 to 10 | 32 | 6  | 11 | 0  | 16 | 5  | 1 | 0 | 4  | 1  |
| Spain                              | No Data   | 0  | 0  | 0  | 0  | 0  | 0  | 0 | 0 | 0  | 0  |
| Sri Lanka                          | >=10      | 18 | 17 | 18 | 17 | 0  | 0  | 0 | 0 | 0  | 0  |
| Saint Vincent and the Grenadines   | >=10      | 30 | 14 | 16 | 0  | 13 | 13 | 1 | 1 | 0  | 0  |
| State of Palestine                 | >=10      | 17 | 17 | 17 | 17 | 0  | 0  | 0 | 0 | 0  | 0  |
| Sudan                              | No Data   | 14 | 0  | 0  | 0  | 14 | 0  | 0 | 0 | 0  | 0  |
| Suriname                           | <5        | 11 | 1  | 0  | 0  | 10 | 0  | 0 | 0 | 1  | 1  |
| Eswatini                           | No Data   | 9  | 0  | 9  | 0  | 0  | 0  | 0 | 0 | 0  | 0  |
| Sweden                             | <5        | 6  | 2  | 0  | 0  | 3  | 0  | 3 | 2 | 0  | 0  |
| Switzerland                        | >=10      | 19 | 18 | 19 | 18 | 0  | 0  | 0 | 0 | 0  | 0  |
| Syrian Arab Republic               | >=10      | 17 | 17 | 17 | 17 | 0  | 0  | 0 | 0 | 0  | 0  |
| Tajikistan                         | No Data   | 0  | 0  | 0  | 0  | 0  | 0  | 0 | 0 | 0  | 0  |
| United Republic of Tanzania        | No Data   | 26 | 0  | 19 | 0  | 0  | 0  | 7 | 0 | 0  | 0  |
| Thailand                           | >=5 to 10 | 13 | 8  | 0  | 0  | 5  | 0  | 3 | 3 | 5  | 5  |
| Timor-Leste                        | No Data   | 1  | 0  | 0  | 0  | 0  | 0  | 0 | 0 | 1  | 0  |
| Togo                               | No Data   | 14 | 0  | 0  | 0  | 12 | 0  | 2 | 0 | 0  | 0  |
| Tonga                              | No Data   | 9  | 0  | 0  | 0  | 9  | 0  | 0 | 0 | 0  | 0  |
| Trinidad and Tobago                | No Data   | 0  | 0  | 0  | 0  | 0  | 0  | 0 | 0 | 0  | 0  |
| Tunisia                            | <5        | 20 | 3  | 17 | 0  | 3  | 3  | 0 | 0 | 0  | 0  |
| Turkey                             | <5        | 16 | 3  | 11 | 0  | 5  | 3  | 0 | 0 | 0  | 0  |
| Turkmenistan                       | >=10      | 17 | 16 | 9  | 9  | 4  | 4  | 3 | 3 | 1  | 0  |
| Tuvalu                             | No Data   | 18 | 0  | 18 | 0  | 0  | 0  | 0 | 0 | 0  | 0  |
| Uganda                             | No Data   | 0  | 0  | 0  | 0  | 0  | 0  | 0 | 0 | 0  | 0  |
| Ukraine                            | >=5 to 10 | 24 | 8  | 0  | 0  | 8  | 1  | 3 | 3 | 13 | 4  |
| United Arab Emirates               | >=10      | 24 | 12 | 20 | 11 | 0  | 0  | 4 | 1 | 0  | 0  |
| United Kingdom                     | >=10      | 18 | 18 | 18 | 18 | 0  | 0  | 0 | 0 | 0  | 0  |
| United States of America           | >=10      | 19 | 19 | 19 | 19 | 0  | 0  | 0 | 0 | 0  | 0  |
| Uruguay                            | >=10      | 17 | 17 | 17 | 17 | 0  | 0  | 0 | 0 | 0  | 0  |
| Uzbekistan                         | >=10      | 19 | 17 | 19 | 17 | 0  | 0  | 0 | 0 | 0  | 0  |
| Vanuatu                            | No Data   | 12 | 0  | 12 | 0  | 0  | 0  | 0 | 0 | 0  | 0  |
| Venezuela (Bolivarian Republic of) | No Data   | 0  | 0  | 0  | 0  | 0  | 0  | 0 | 0 | 0  | 0  |
| Viet Nam                           | No Data   | 13 | 0  | 13 | 0  | 0  | 0  | 0 | 0 | 0  | 0  |
| Yemen                              | <5        | 3  | 1  | 0  | 0  | 0  | 0  | 1 | 0 | 2  | 1  |
| Zambia                             | <5        | 2  | 2  | 0  | 0  | 0  | 0  | 1 | 1 | 1  | 1  |
| Zimbabwe                           | >=10      | 26 | 12 | 0  | 0  | 0  | 0  | 3 | 1 | 23 | 11 |

Figure A4: Ratio of stillbirth rate and neonatal mortality rate and stillbirth rate in countries, 2019

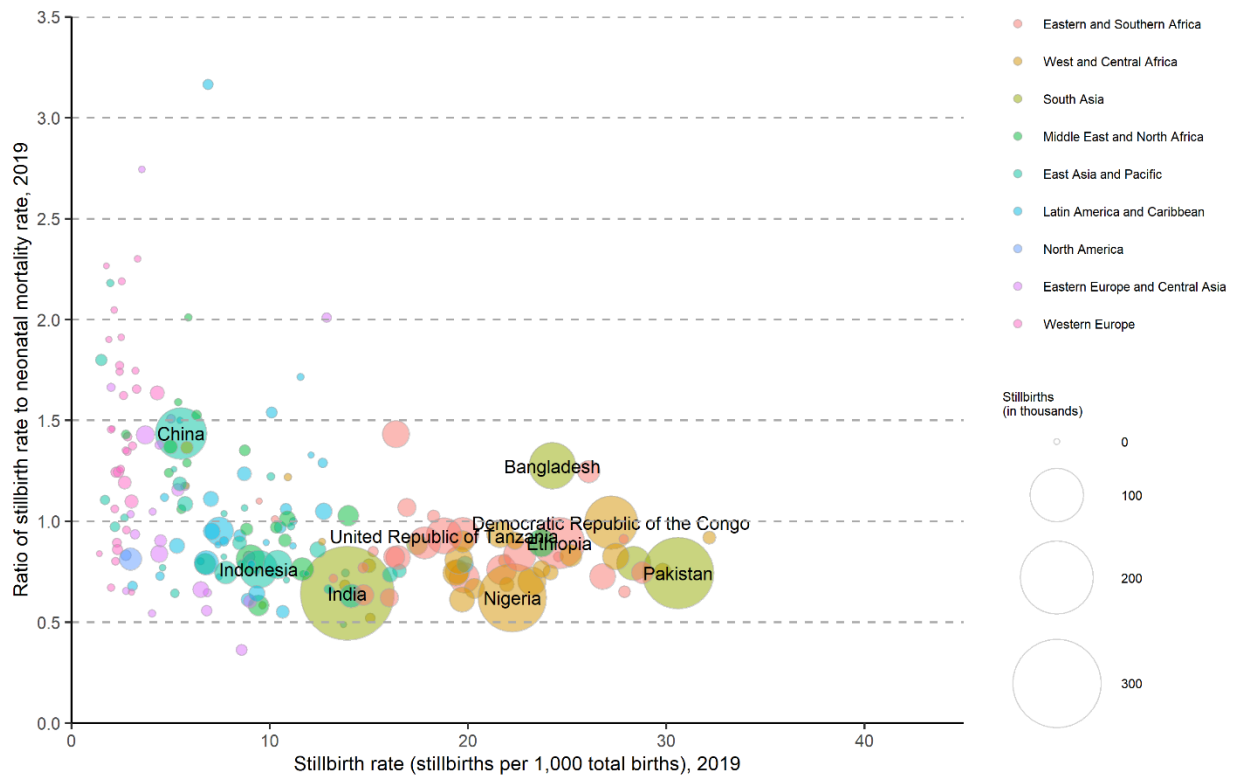

Note: Each bubble represents a country, the size of the bubbles indicates the number of stillbirths.

Figure A5: Ratio of stillbirth rate and neonatal mortality rate and stillbirth rate in countries, 2000-2019

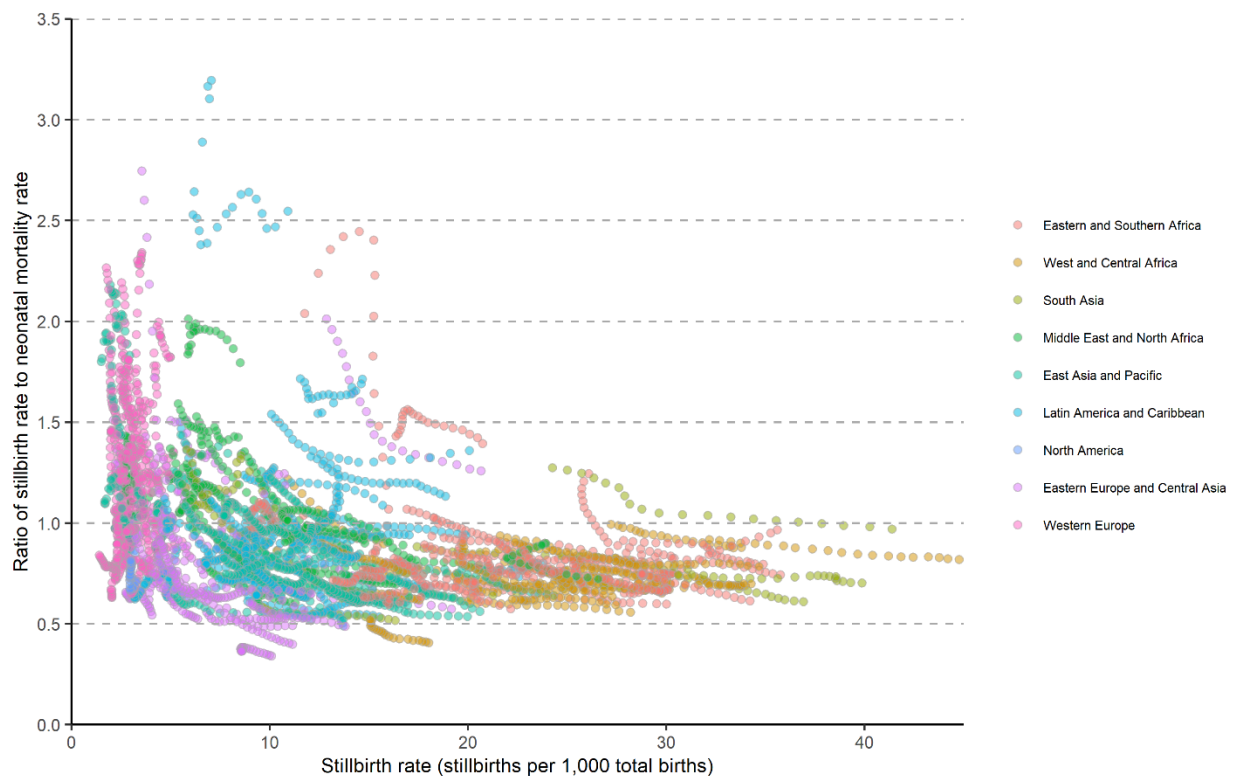

Figure A6: Stillbirth rate estimates with underlying data, by country or territory (pp 47-241)

## References

<sup>1</sup> <[www.dhis2.org](http://www.dhis2.org)>, accessed 22 September 2020.

<sup>2</sup> Bradley S E K, Winfrey W, Croft T N (2015). Contraceptive Use and Perinatal Mortality in the DHS: An Assessment of the Quality and Consistency of Calendars and Histories. DHS Methodological Reports No. 17. Rockville, Maryland, USA: ICF International.

<sup>3</sup> Blencowe H, et al., 'National, regional, and worldwide estimates of stillbirth rates in 2015, with trends from 2000: a systematic analysis', *Lancet Global Health* 2016;4 (2): 98–108.

<sup>4</sup> Wang, Z et al. Estimating the Stillbirth Rate for 195 Countries Using A Bayesian Sparse Regression Model with Temporal Smoothing. <https://arxiv.org/abs/2010.03551>.(2020) arXiv preprint arXiv:2010.03551 (2020).

<sup>5</sup> United Nations Department of Economic and Social Affairs Population Division, World Population Prospects: The 2019 revision, UN, New York, 2019; available [here](#).

# Afghanistan

Available Data

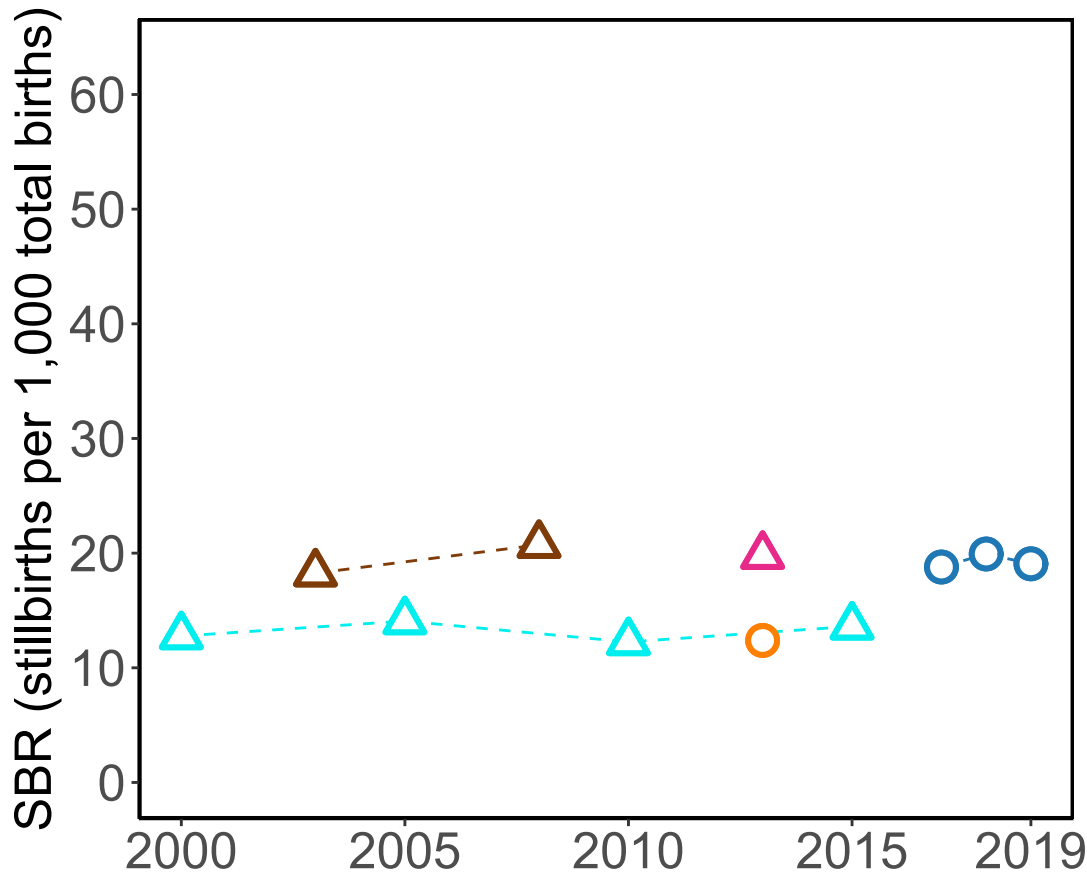

'28+ Weeks of Gestation' Data  
(Incl. Adjusted Data)

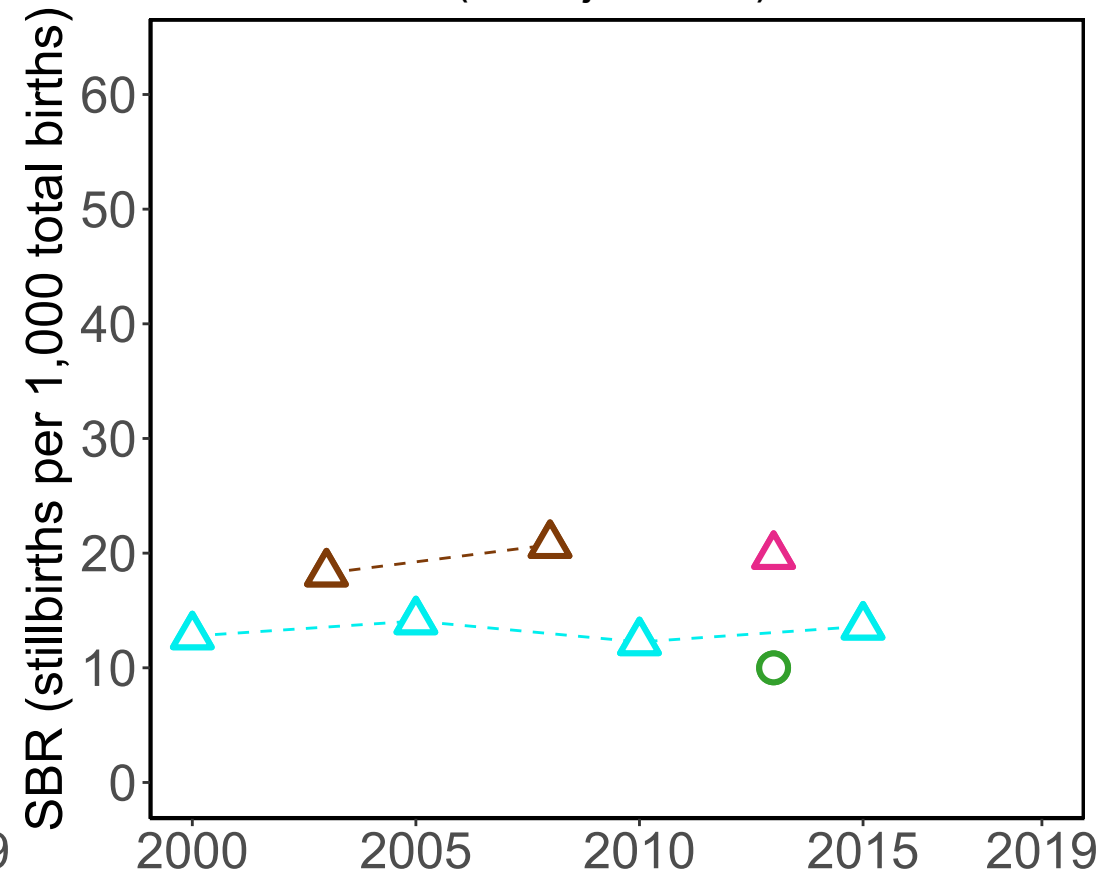

Data Included in the Model

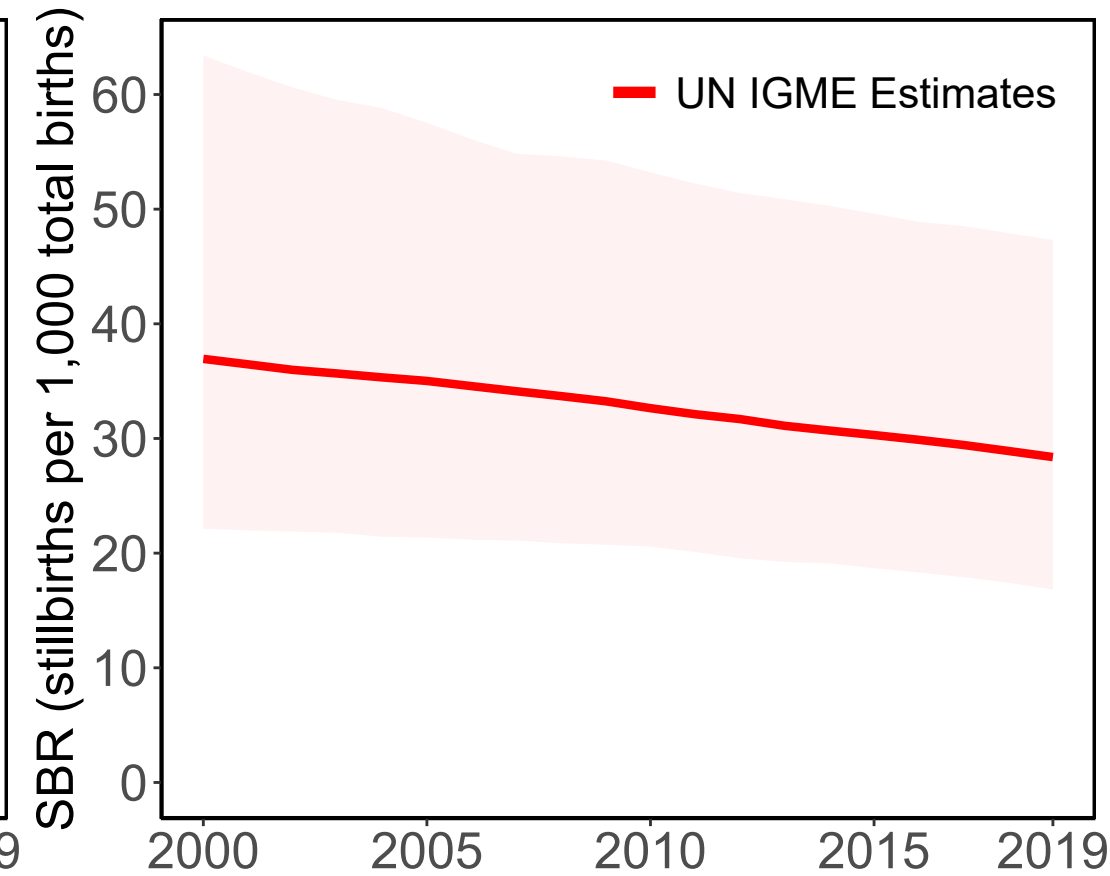

Source Types

○ HMIS △ Survey

Data Sources

○ HMIS-DHIS2 (not defined)

○ HMIS-DHIS2 (500g)

△ Health Survey 2018 (Other) (PH) (28wks)

○ HMIS-DHIS2 (28wks adj from 22wks)

△ Demographic and Health Survey 2015 (DHS) (RC) (28wks)

△ Afghanistan Mortality Survey 2010 (DHS) (PH) (28wks)

# Angola

### Available Data

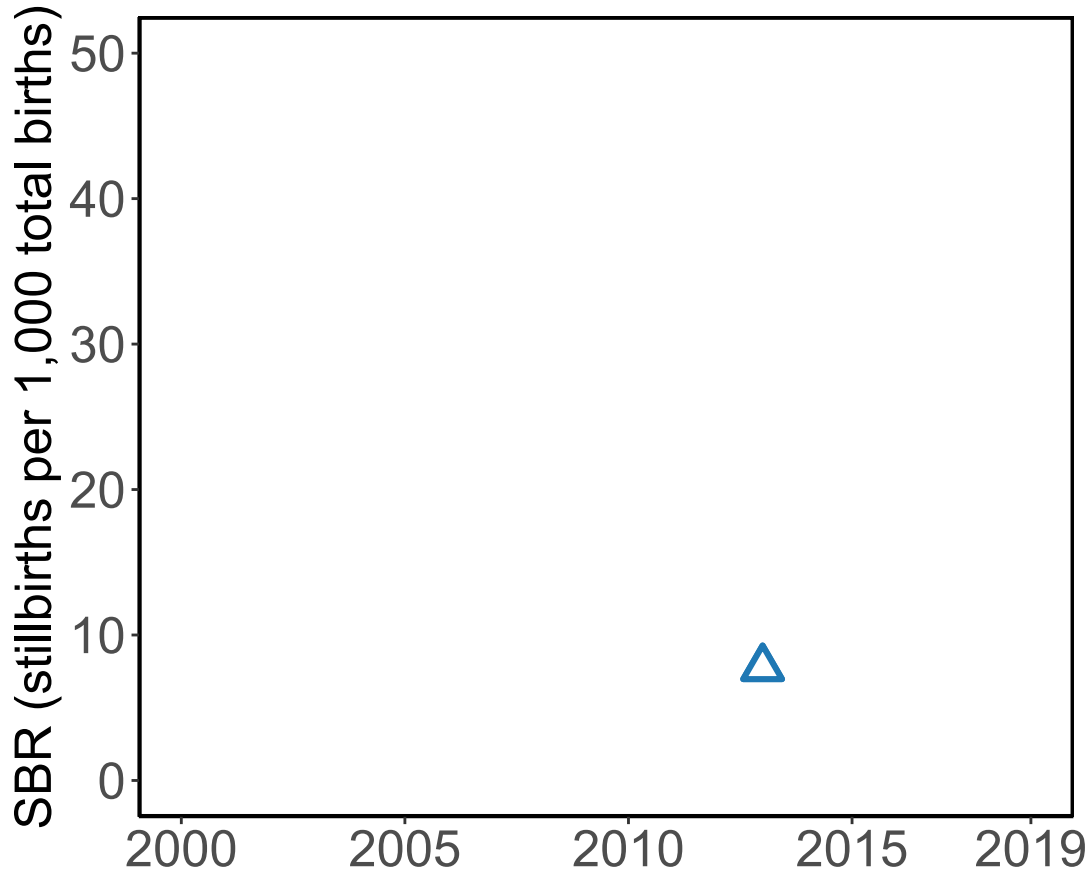

### '28+ Weeks of Gestation' Data (Incl. Adjusted Data)

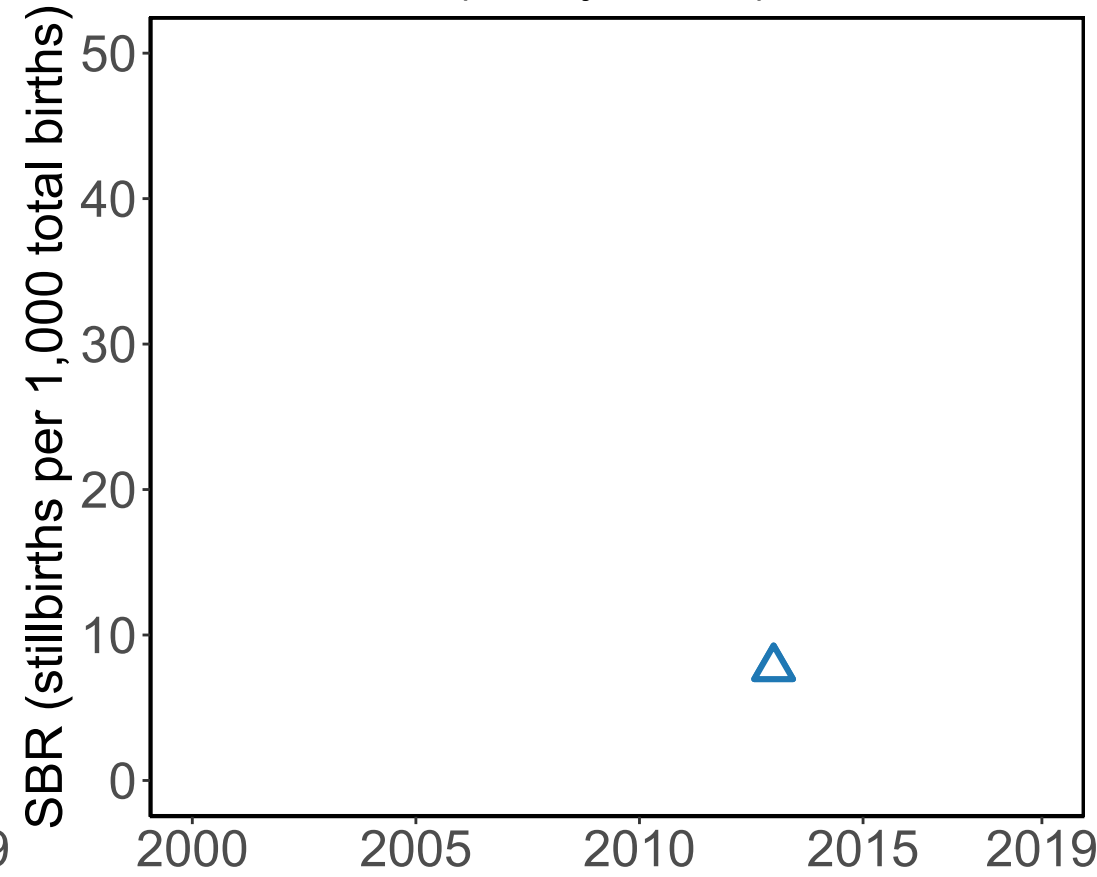

### Data Included in the Model

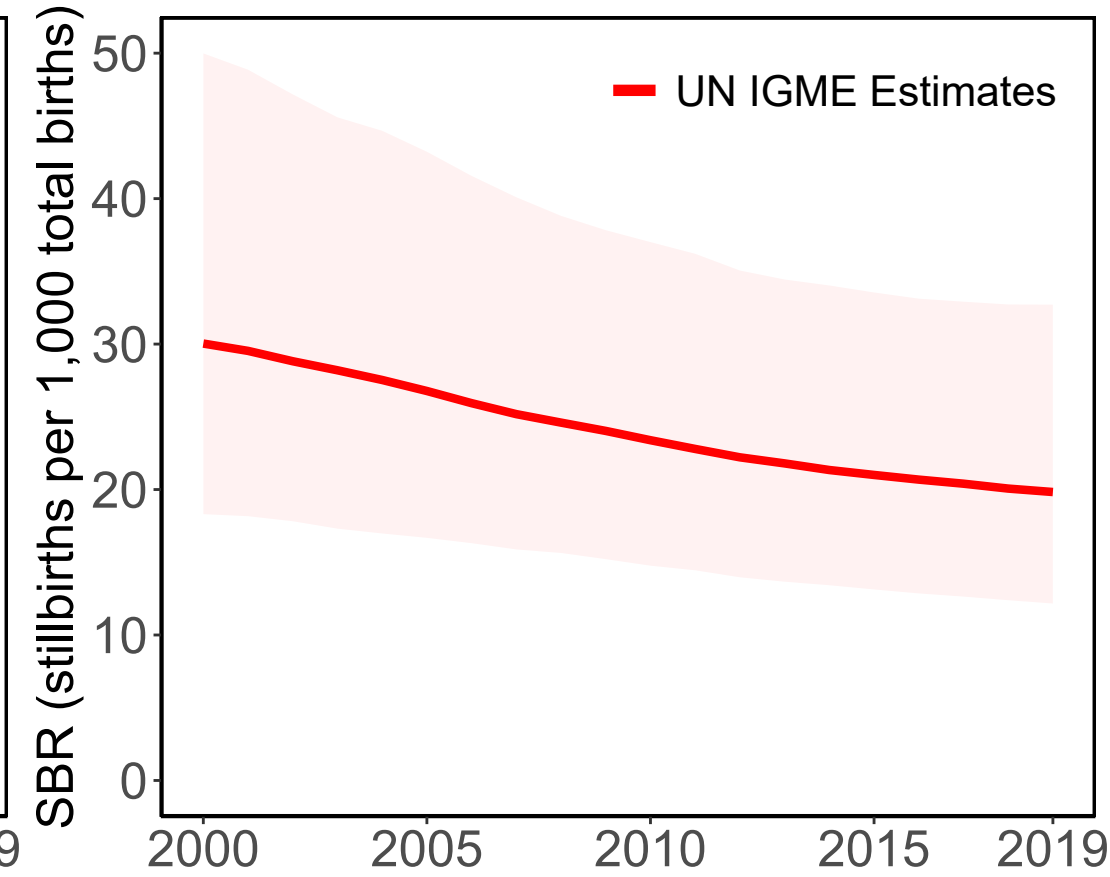

#### Source Types

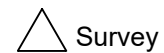

Survey

#### Data Sources

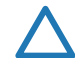

Inquérito de Indicadores Múltiplos e de Saúde 2015-16 (DHS) (RC) (28wks)

# Albania

Available Data

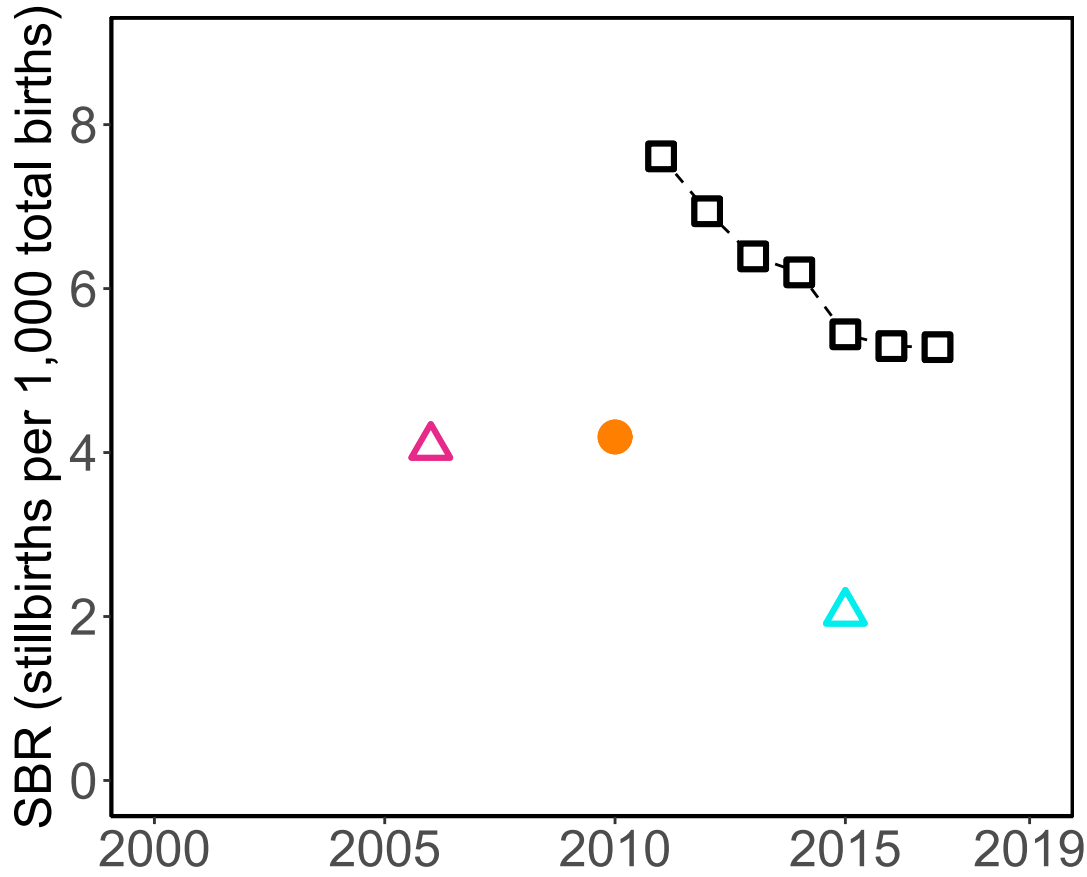

'28+ Weeks of Gestation' Data (Incl. Adjusted Data)

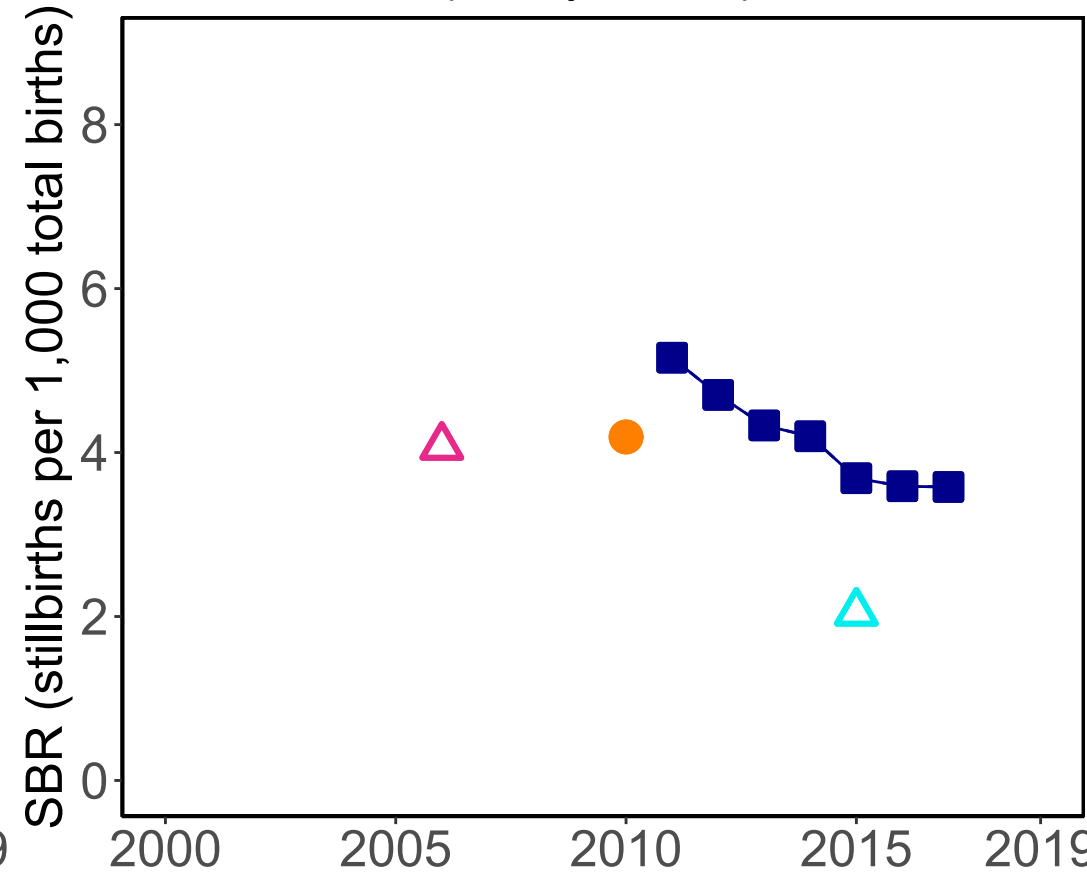

Data Included in the Model

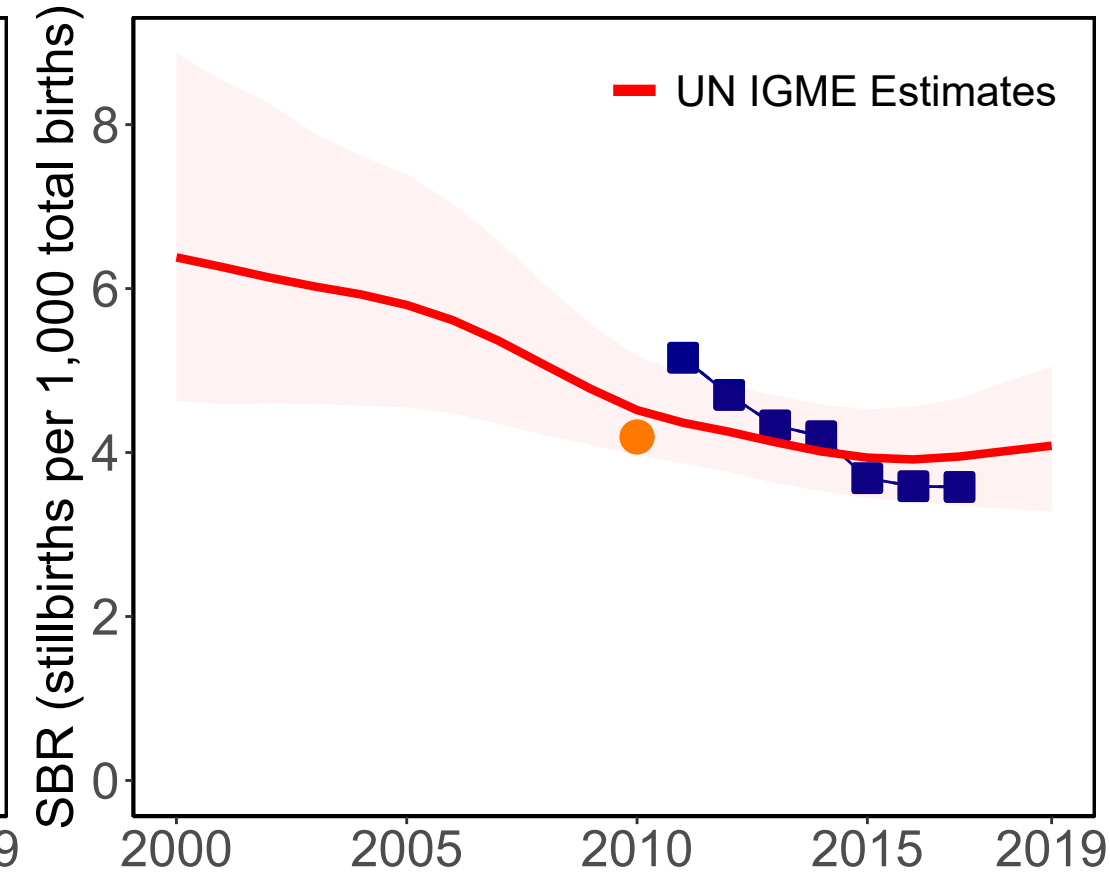

Source Types

- Administrative
- HMIS
- Survey

Data Sources

- Vital Registration (22wks)
- Vital Registration (28wks adj from 22wks)
- HMIS-DHIS2 (28wks)
- Demographic and Health Survey 2017-18 (DHS) (RC) (28wks)
- Demographic and Health Survey 2008-09 (DHS) (RC) (28wks)

# Andorra

### Available Data

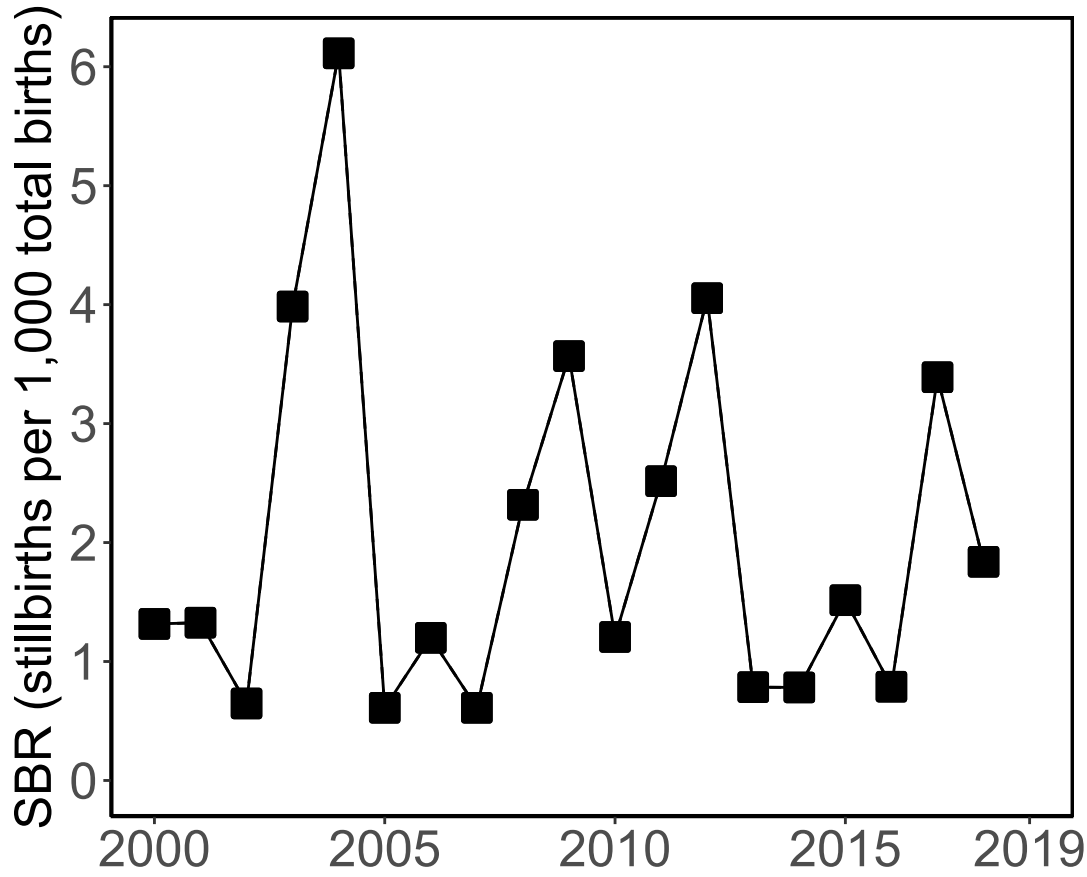

### '28+ Weeks of Gestation' Data (Incl. Adjusted Data)

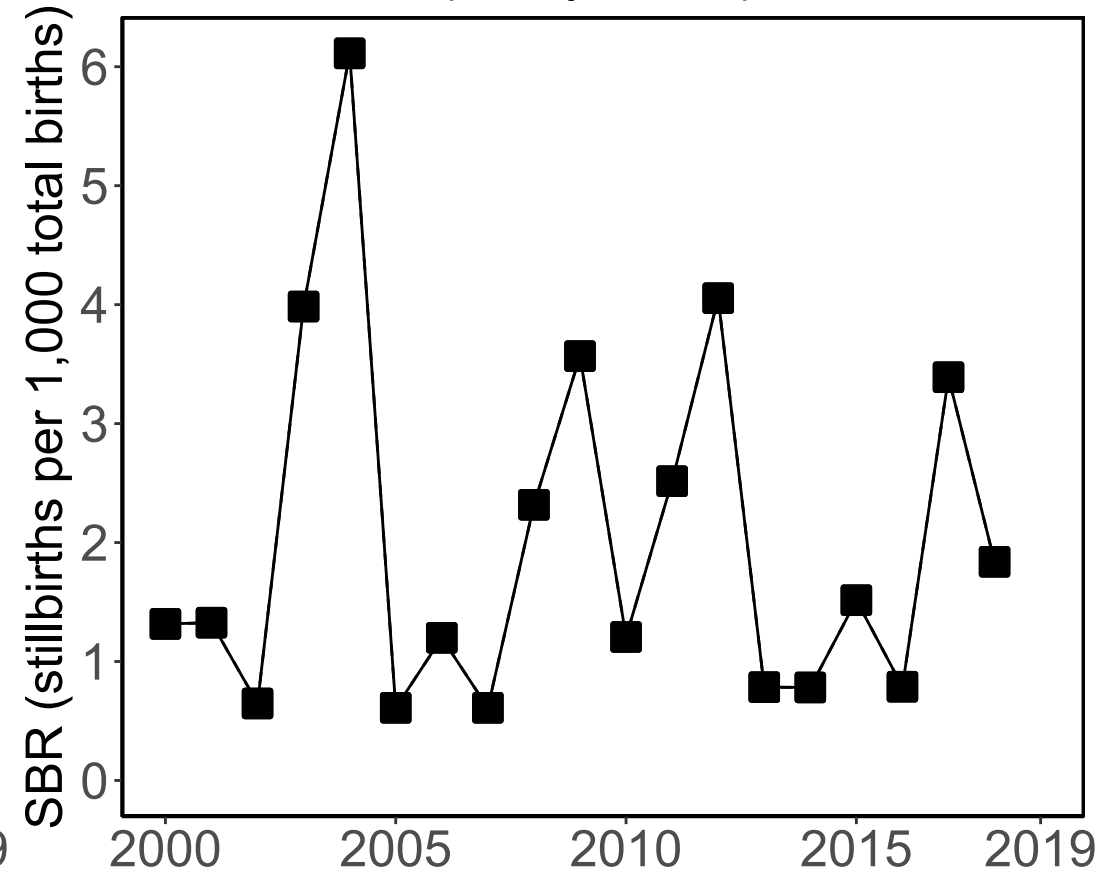

### Data Included in the Model

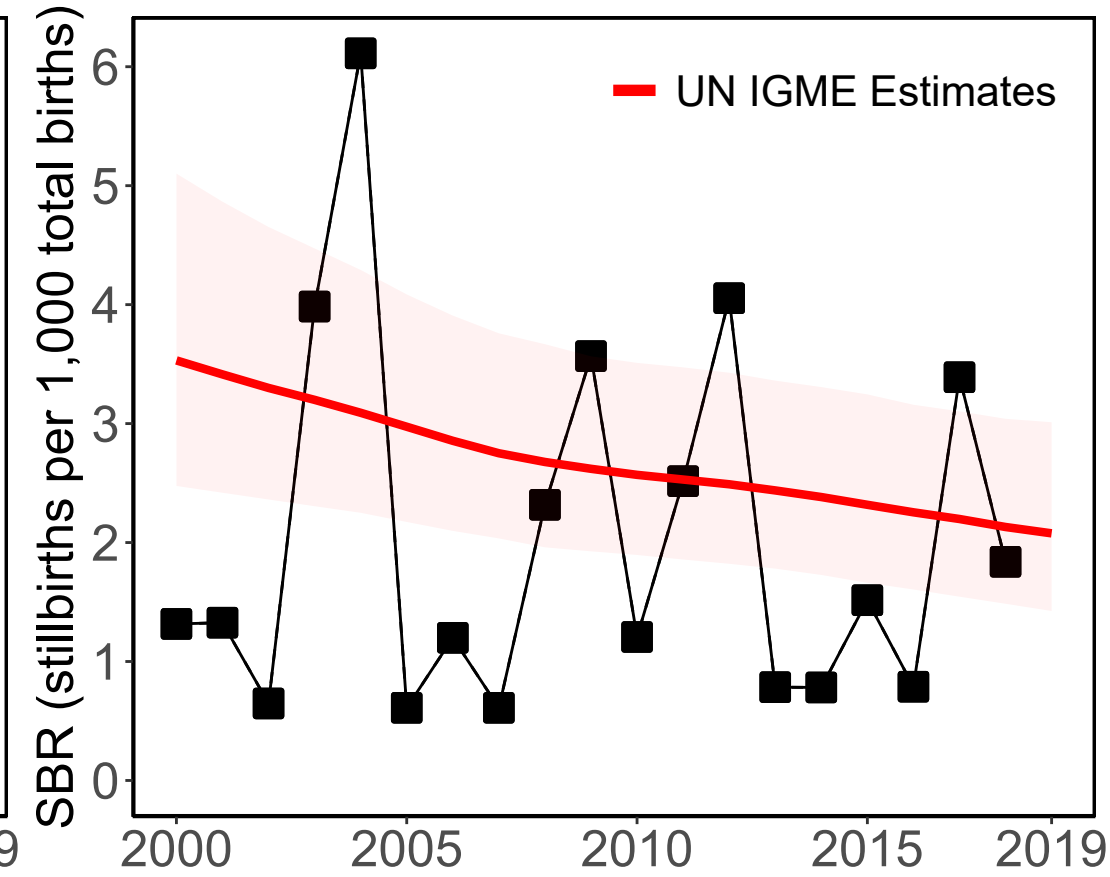

#### Source Types

□ Administrative

#### Data Sources

■ Birth or Death Registry (28wks)

# United Arab Emirates

### Available Data

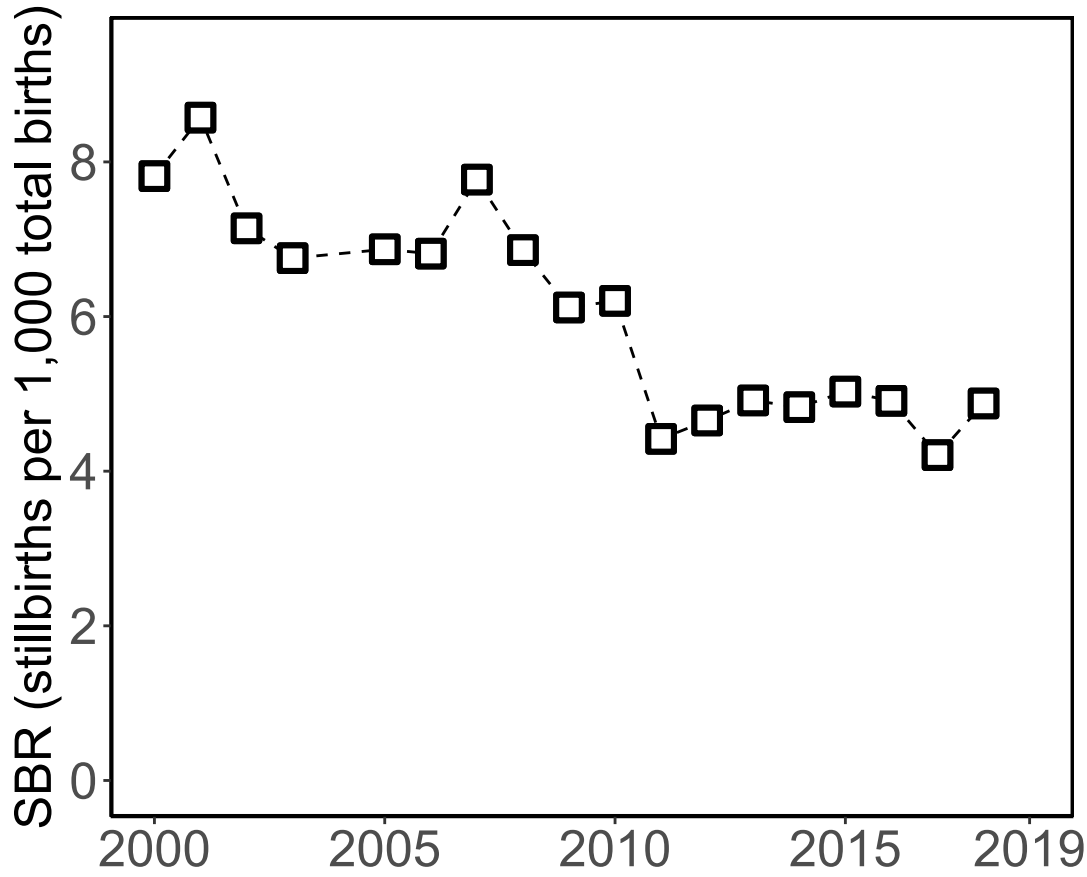

### '28+ Weeks of Gestation' Data (Incl. Adjusted Data)

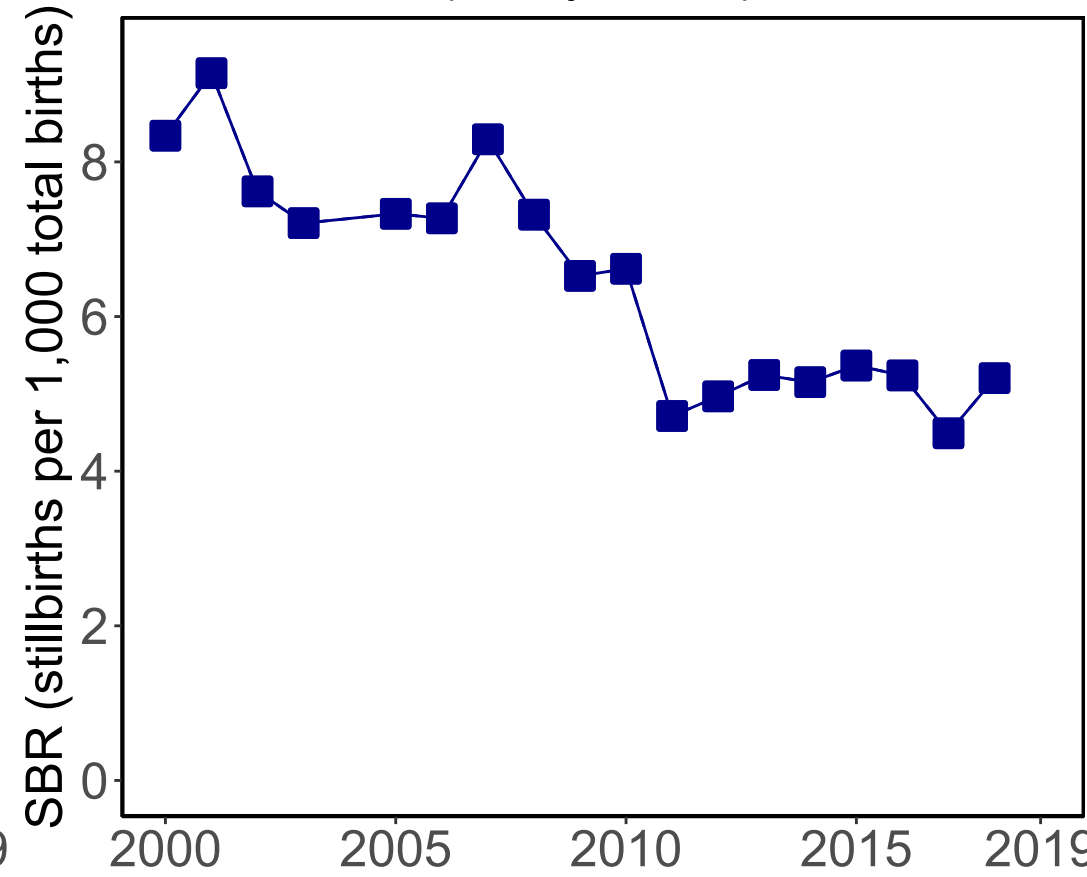

### Data Included in the Model

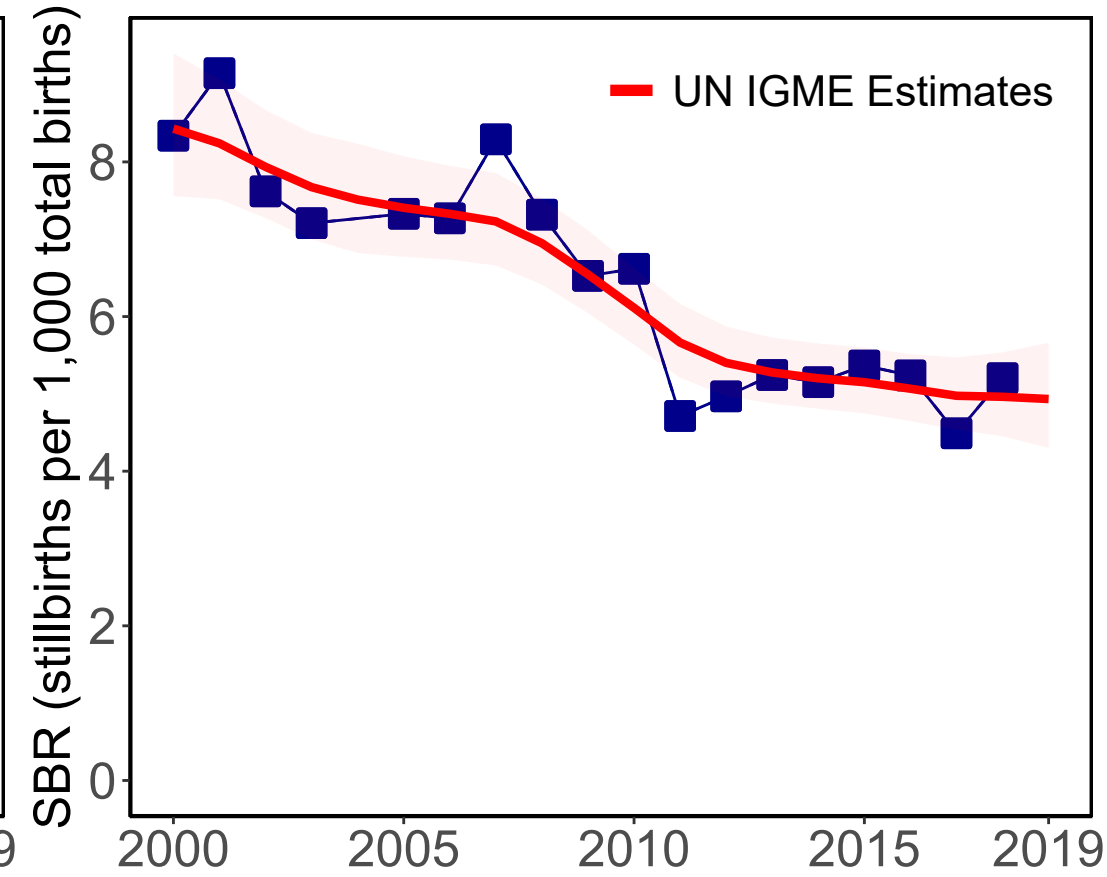

#### Source Types

Administrative

#### Data Sources

Vital Registration (1000g)

Vital Registration (28wks adj from 1000g)



# Argentina

### Available Data

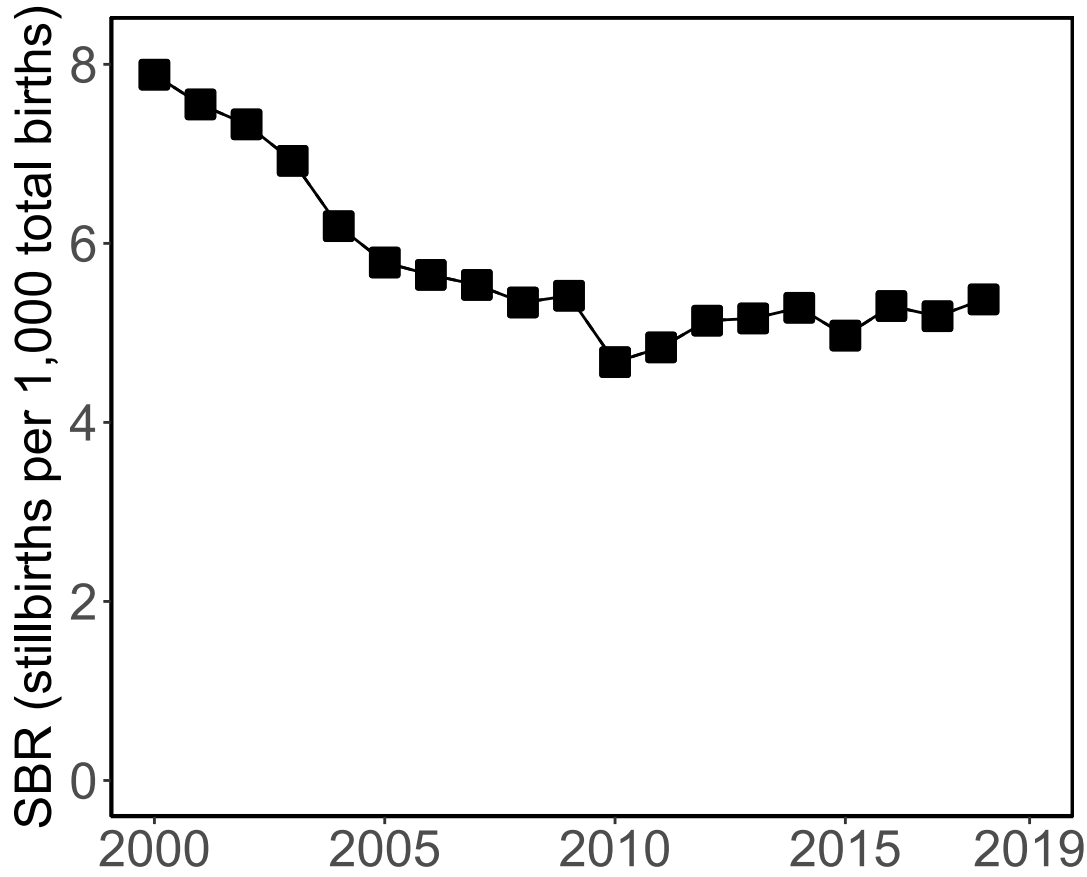

### '28+ Weeks of Gestation' Data (Incl. Adjusted Data)

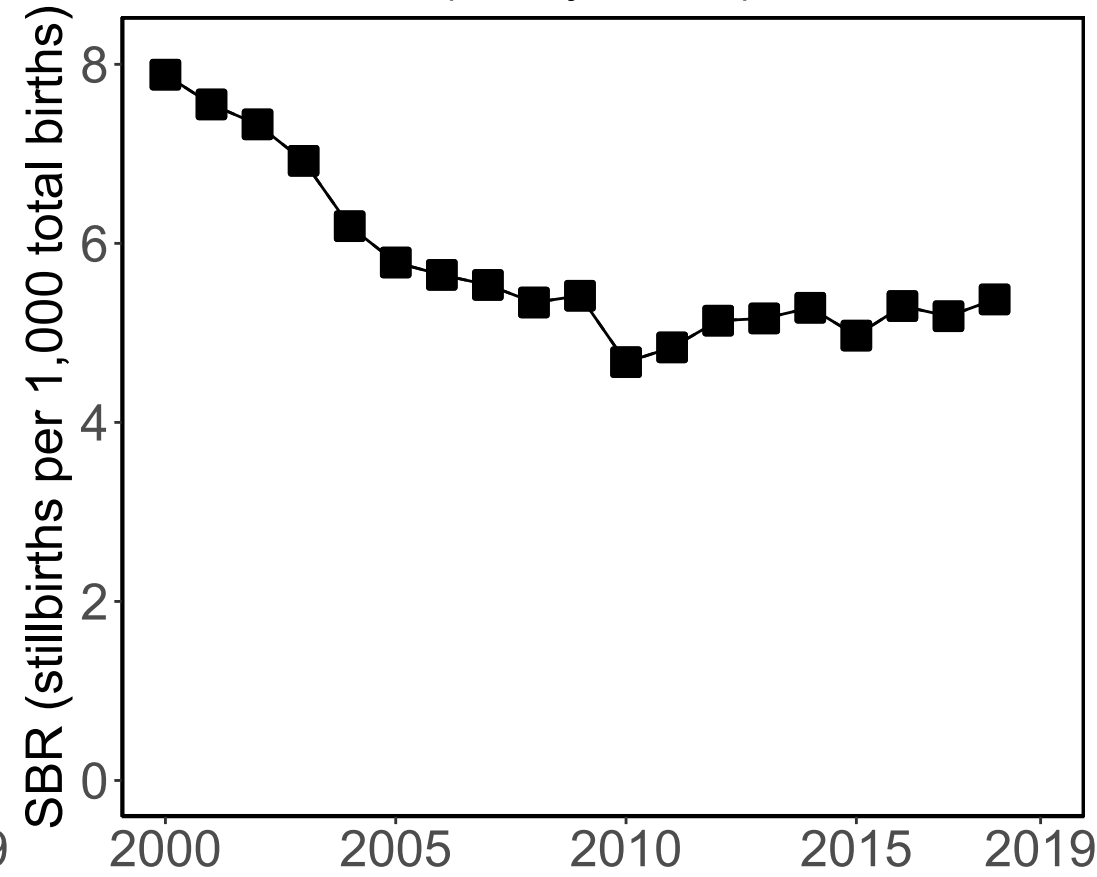

### Data Included in the Model

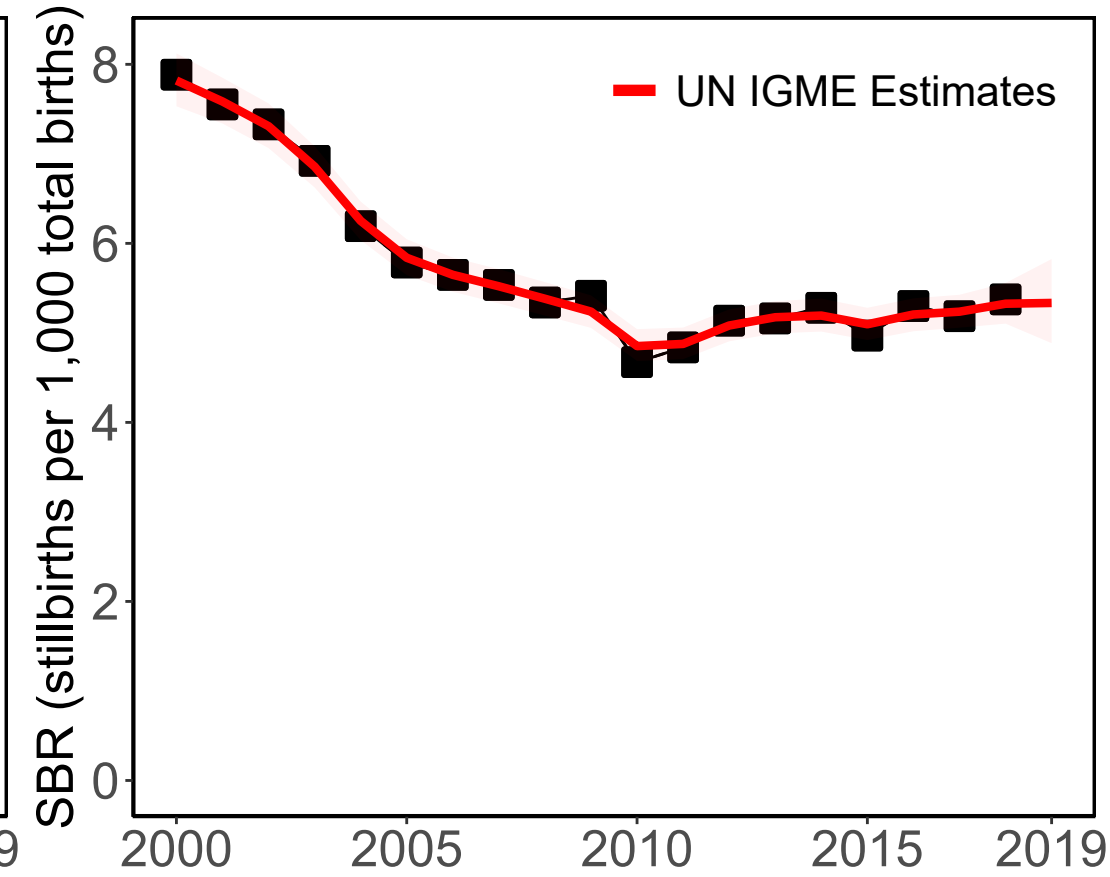

#### Source Types

□ Administrative

#### Data Sources

■ Vital Registration (28wks)

# Armenia

Available Data

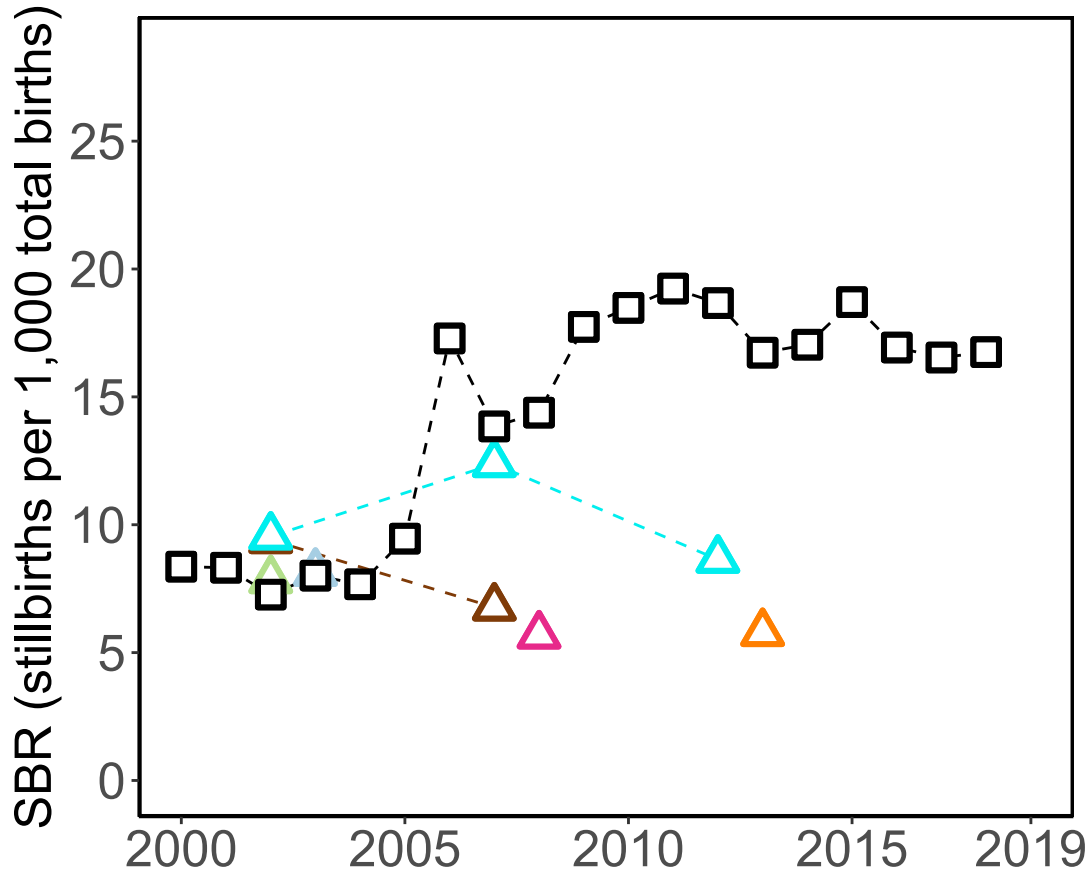

'28+ Weeks of Gestation' Data (Incl. Adjusted Data)

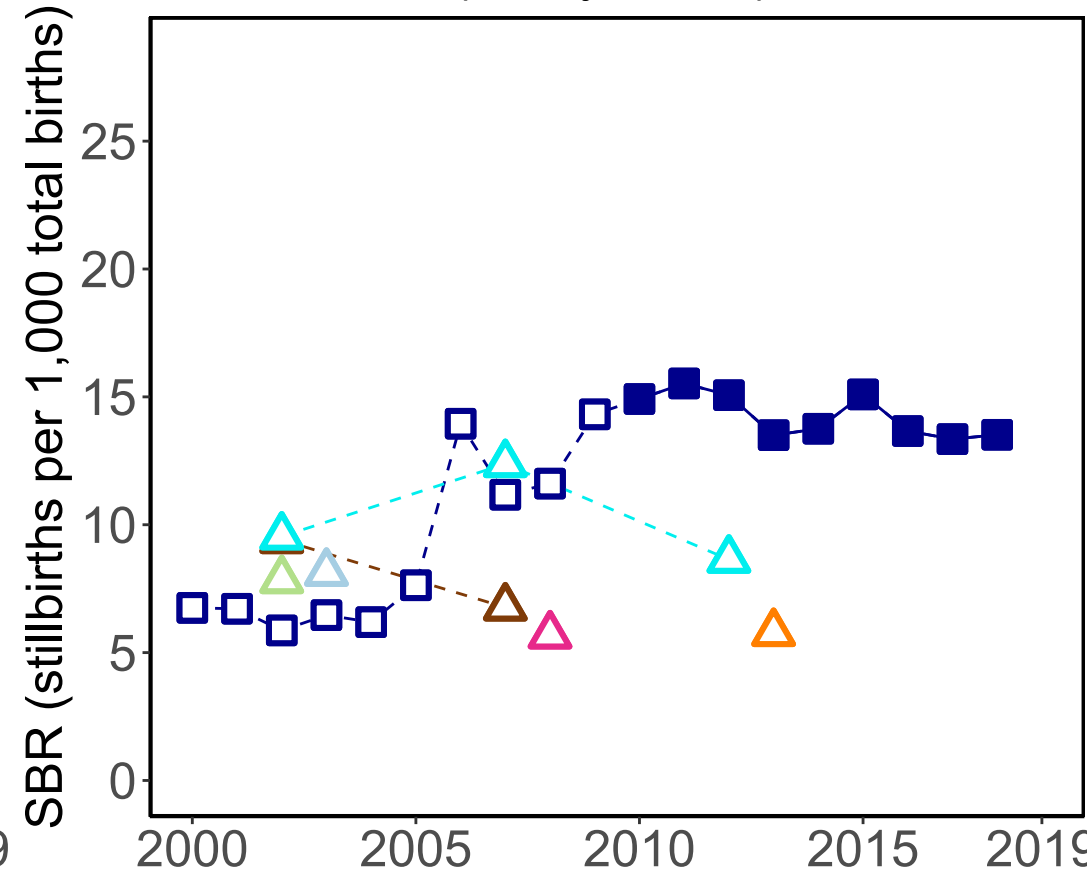

Data Included in the Model

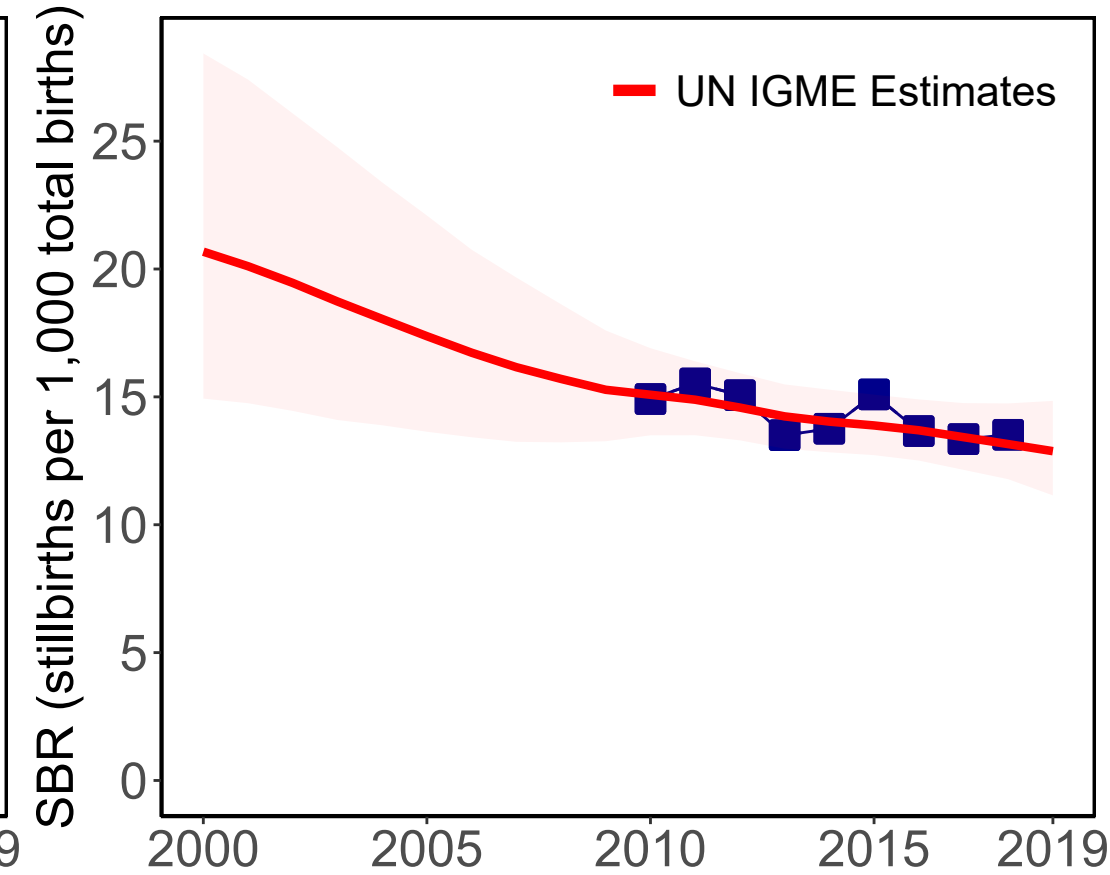

Source Types

□ Administrative    △ Survey

Data Sources

■ Vital Registration (28wks adj from 22wks)

□ Vital Registration (22wks)

△ Demographic and Health Survey 2015-16 (DHS) (RC) (28wks)

△ Demographic and Health Survey 2010 (DHS) (RC) (28wks)

△ Demographic and Health Survey 2015-16 (DHS) (PH) (28wks)

△ Demographic and Health Survey 2010 (DHS) (PH) (28wks)

△ Demographic and Health Survey 2005 (DHS) (RC) (28wks)

△ Demographic and Health Survey 2005 (DHS) (PH) (28wks)

# Antigua and Barbuda

Available Data

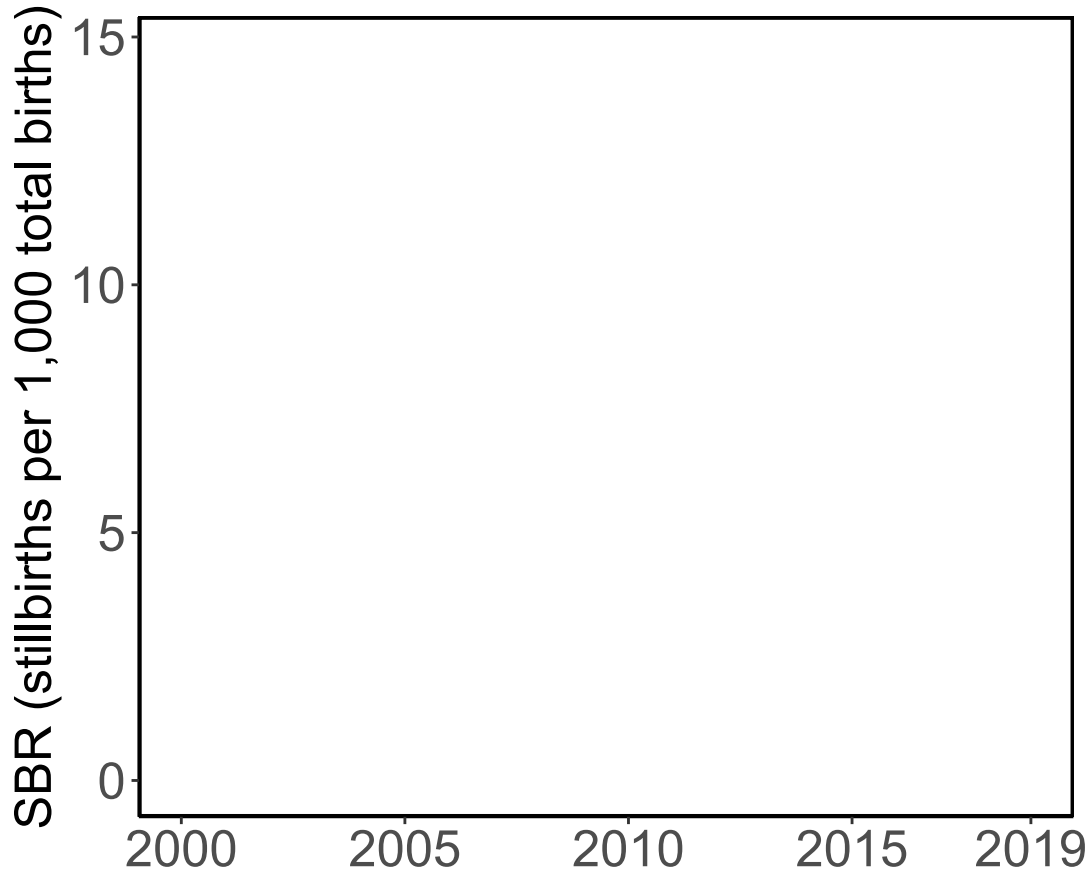

'28+ Weeks of Gestation' Data  
(Incl. Adjusted Data)

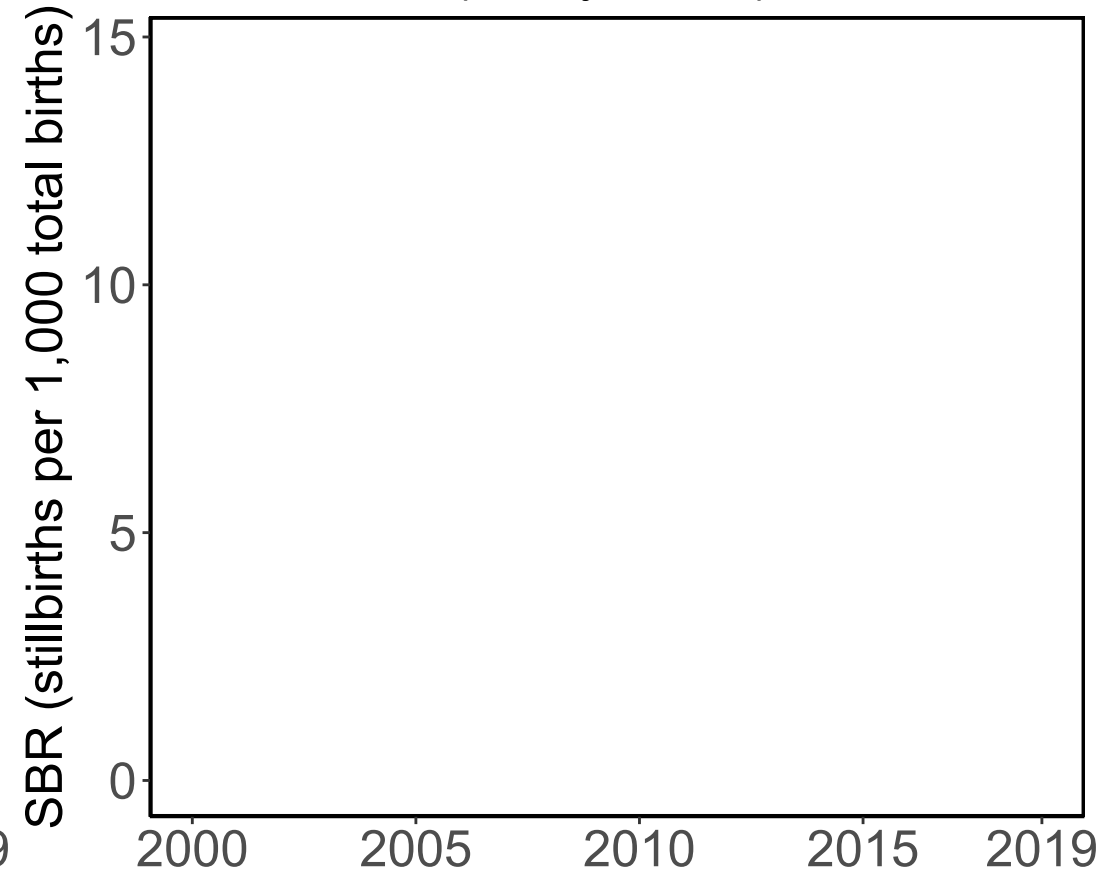

Data Included in the Model

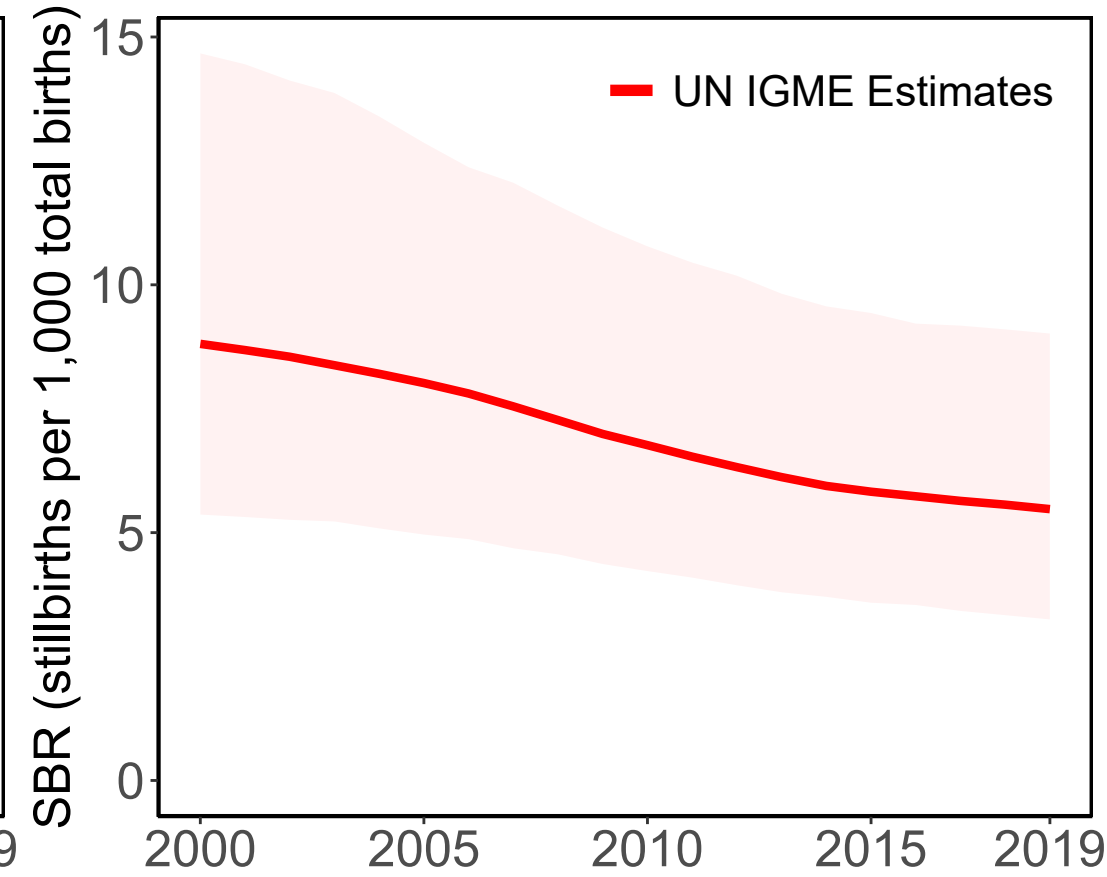

# Australia

### Available Data

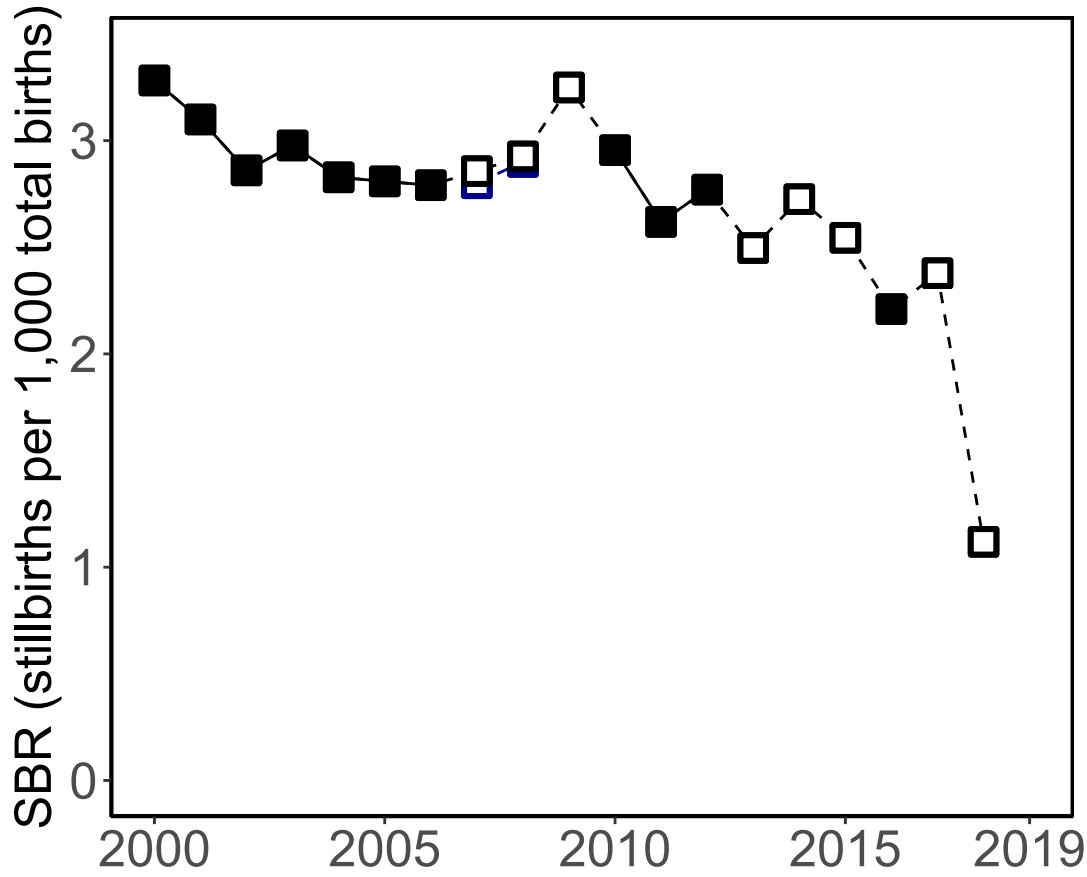

### '28+ Weeks of Gestation' Data (Incl. Adjusted Data)

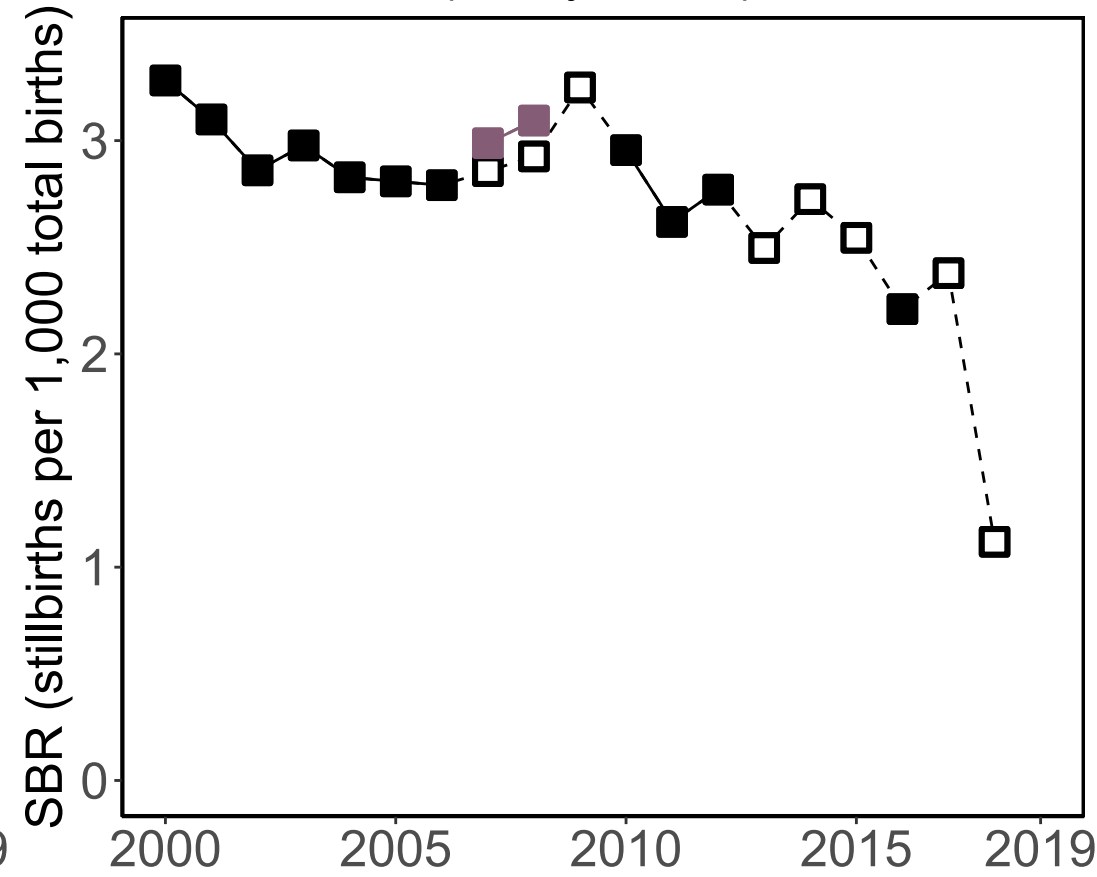

### Data Included in the Model

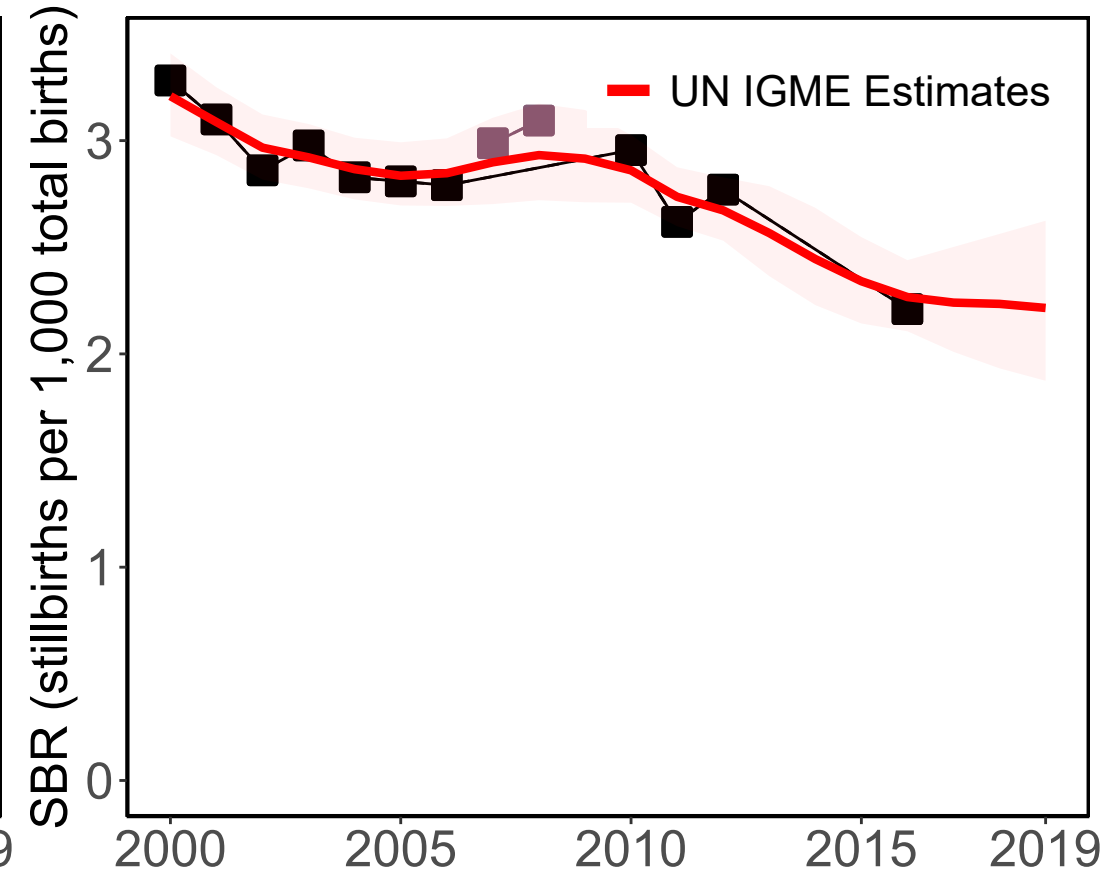

#### Source Types

□ Administrative

#### Data Sources

□ Vital Registration (1000g)

■ Vital Registration (28wks adj from 1000g)

■ Vital Registration (28wks)

— UN IGME Estimates

# Austria

### Available Data

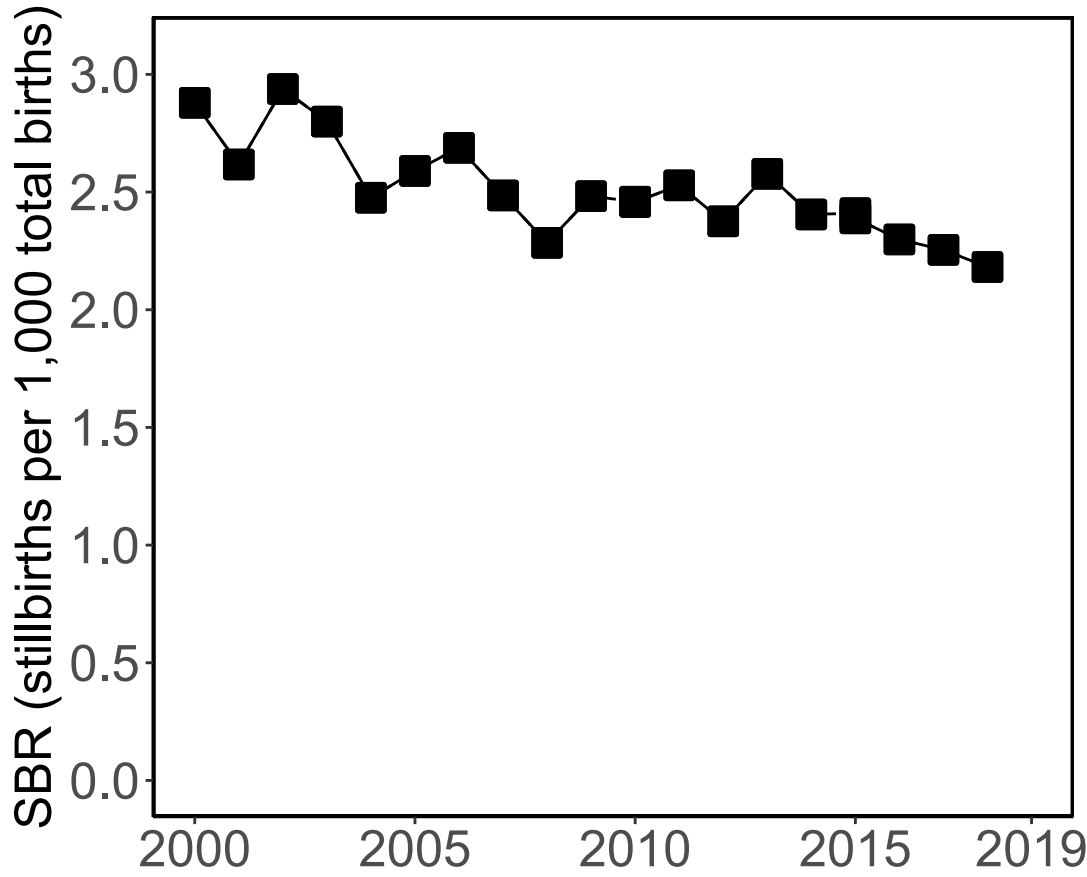

### '28+ Weeks of Gestation' Data (Incl. Adjusted Data)

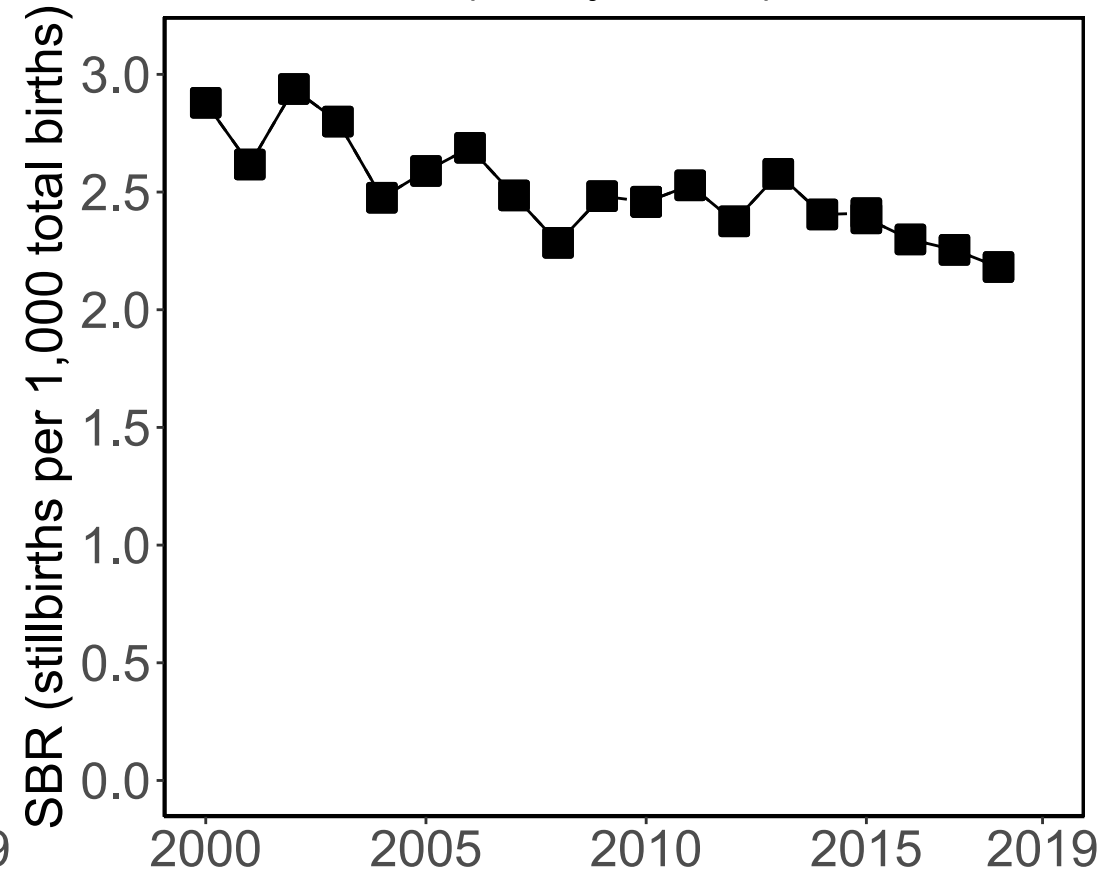

### Data Included in the Model

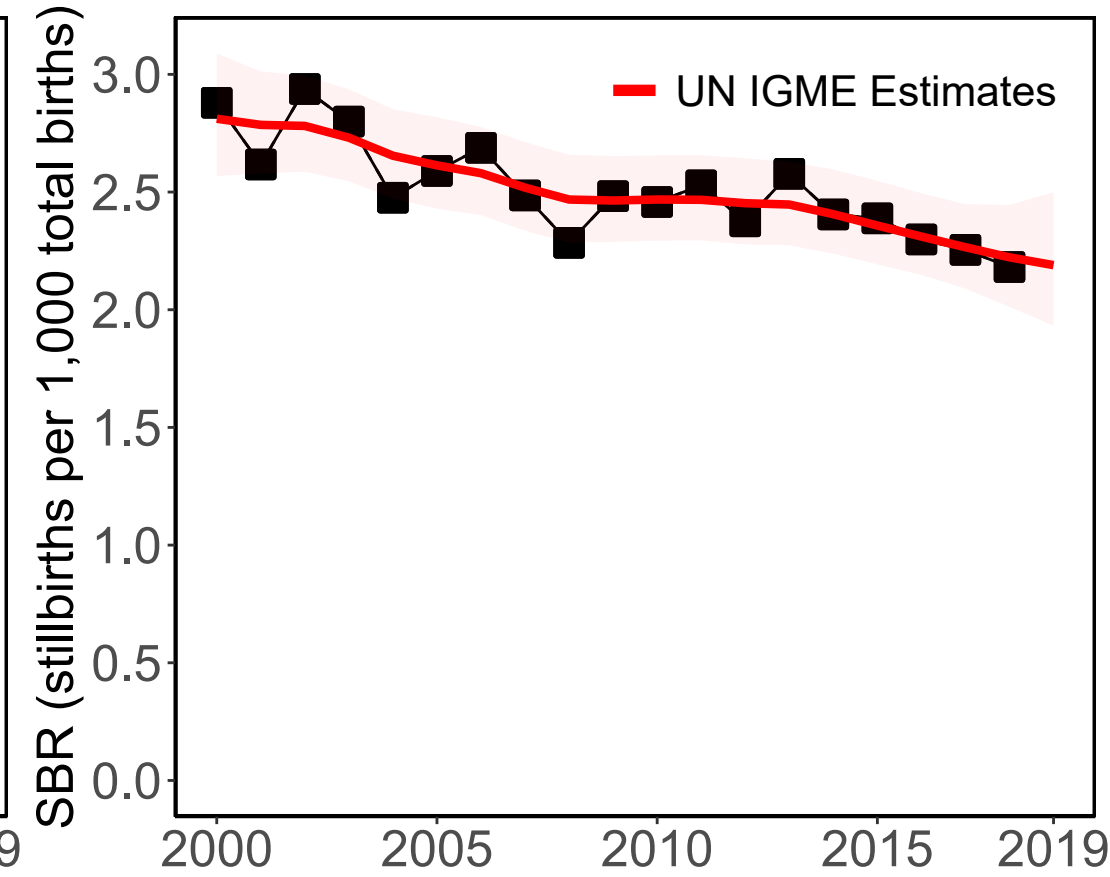

#### Source Types

□ Administrative

#### Data Sources

■ Vital Registration (28wks)

# Azerbaijan

Available Data

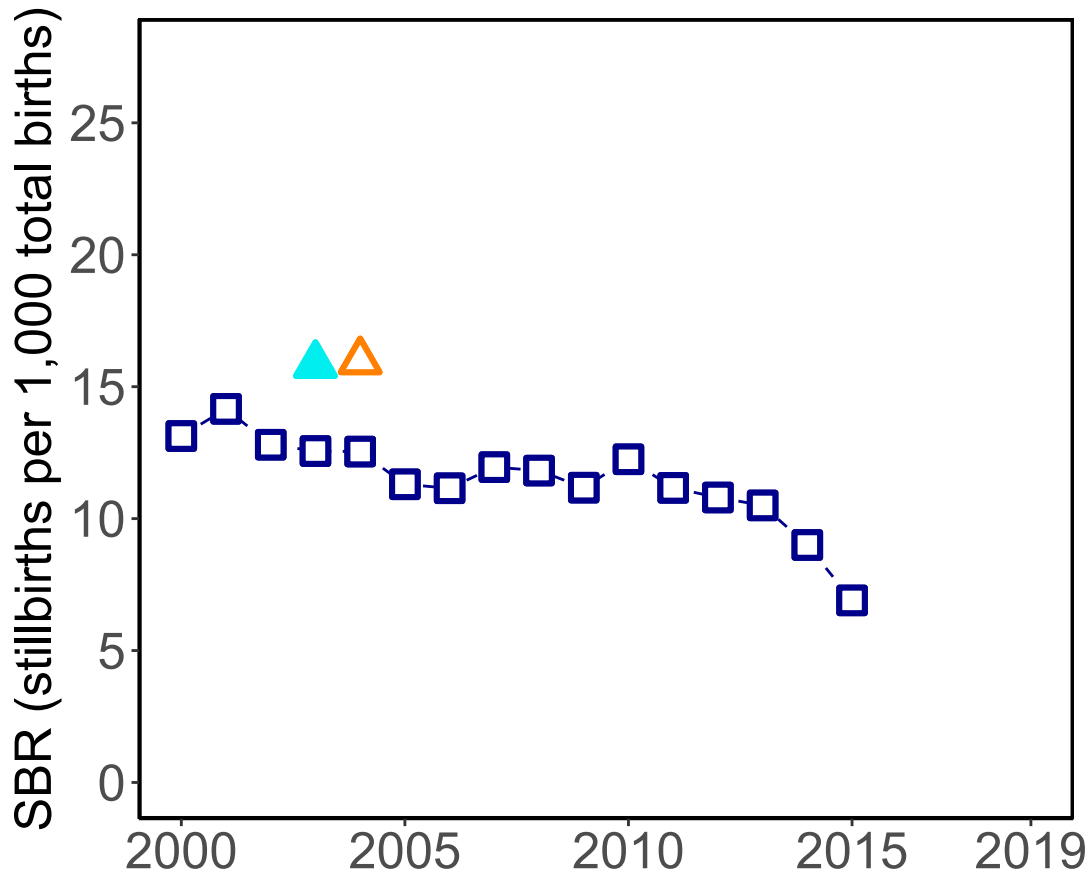

'28+ Weeks of Gestation' Data  
(Incl. Adjusted Data)

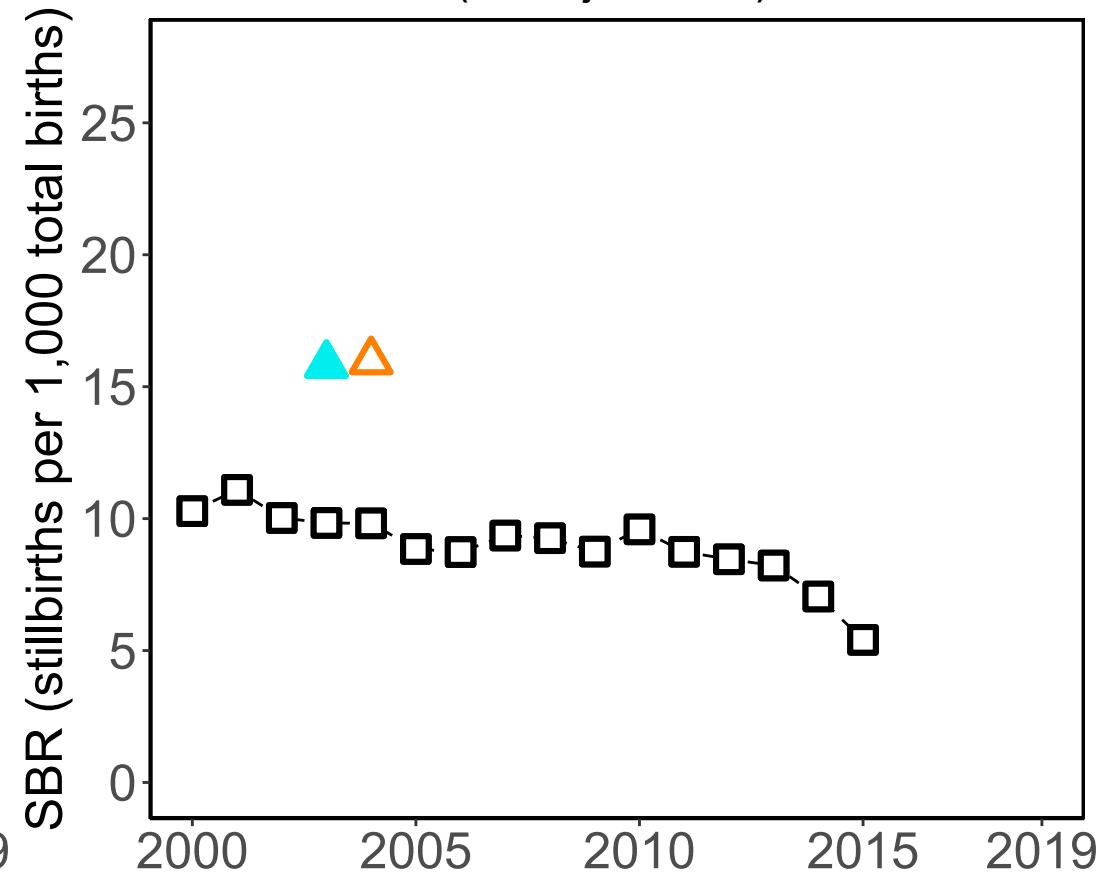

Data Included in the Model

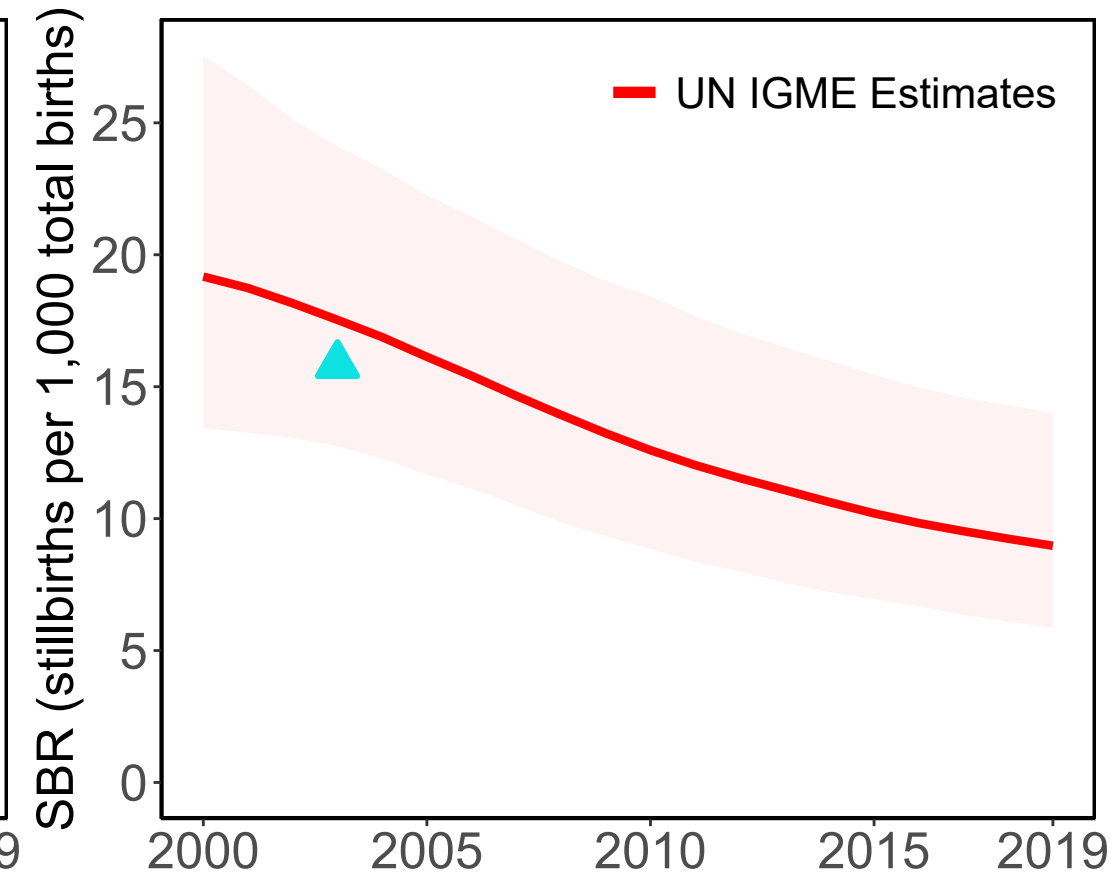

Source Types

□ Administrative    △ Survey

Data Sources

□ Vital Registration (28wks adj from 500g)    □ Vital Registration (500g)

△ Demographic and Health Survey 2006 (DHS) (RC) (28wks)    △ Demographic and Health Survey 2006 (DHS) (PH) (28wks)

# Burundi

### Available Data

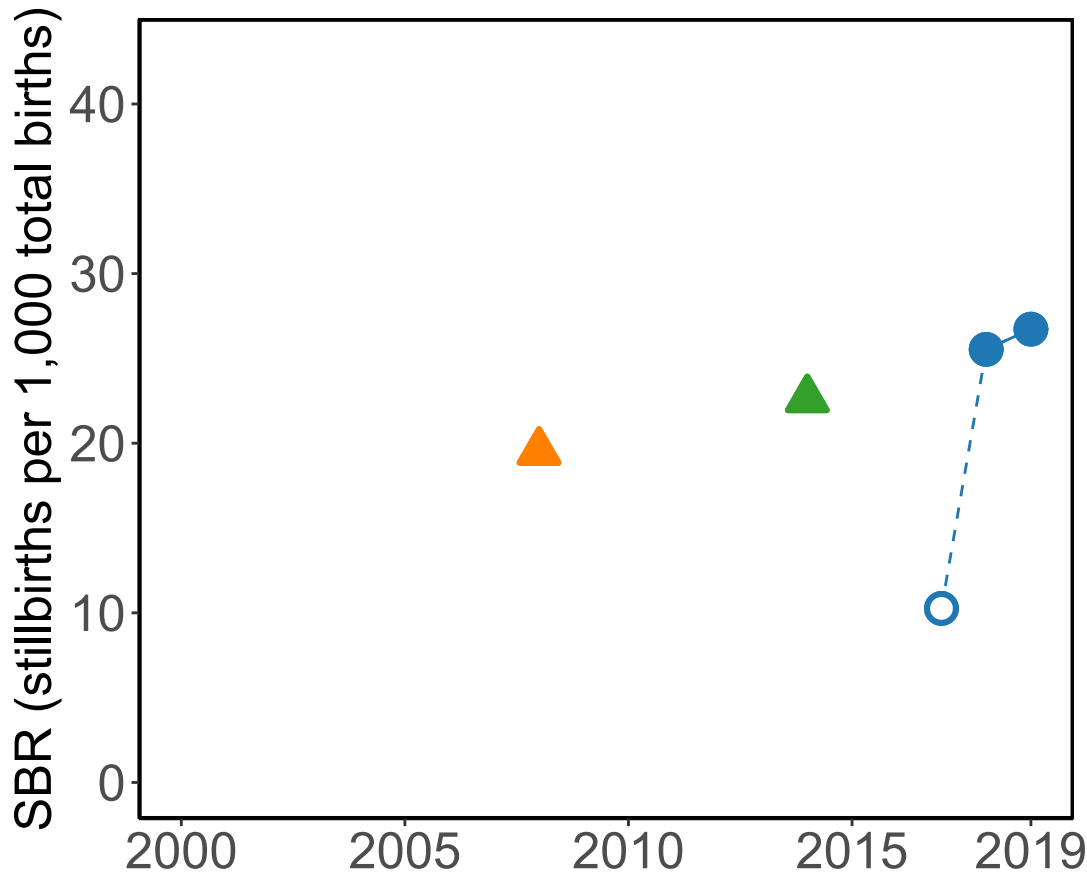

### '28+ Weeks of Gestation' Data (Incl. Adjusted Data)

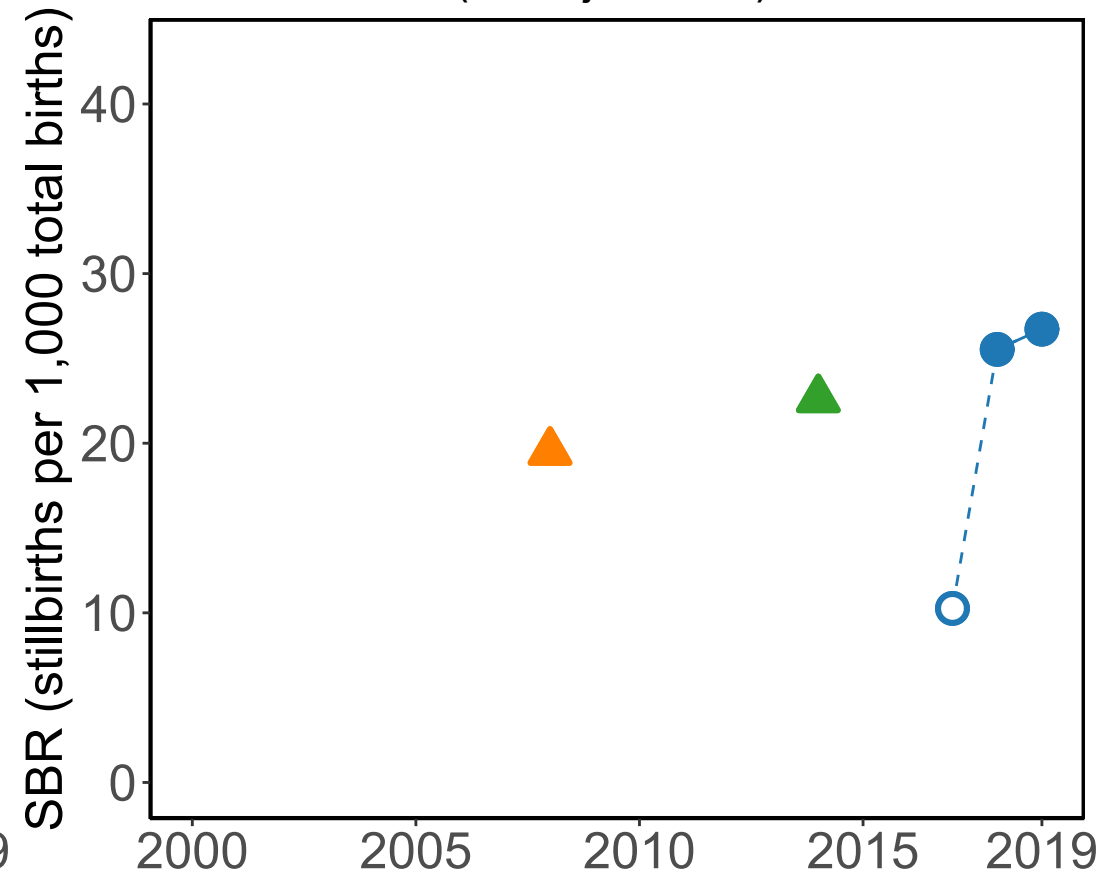

### Data Included in the Model

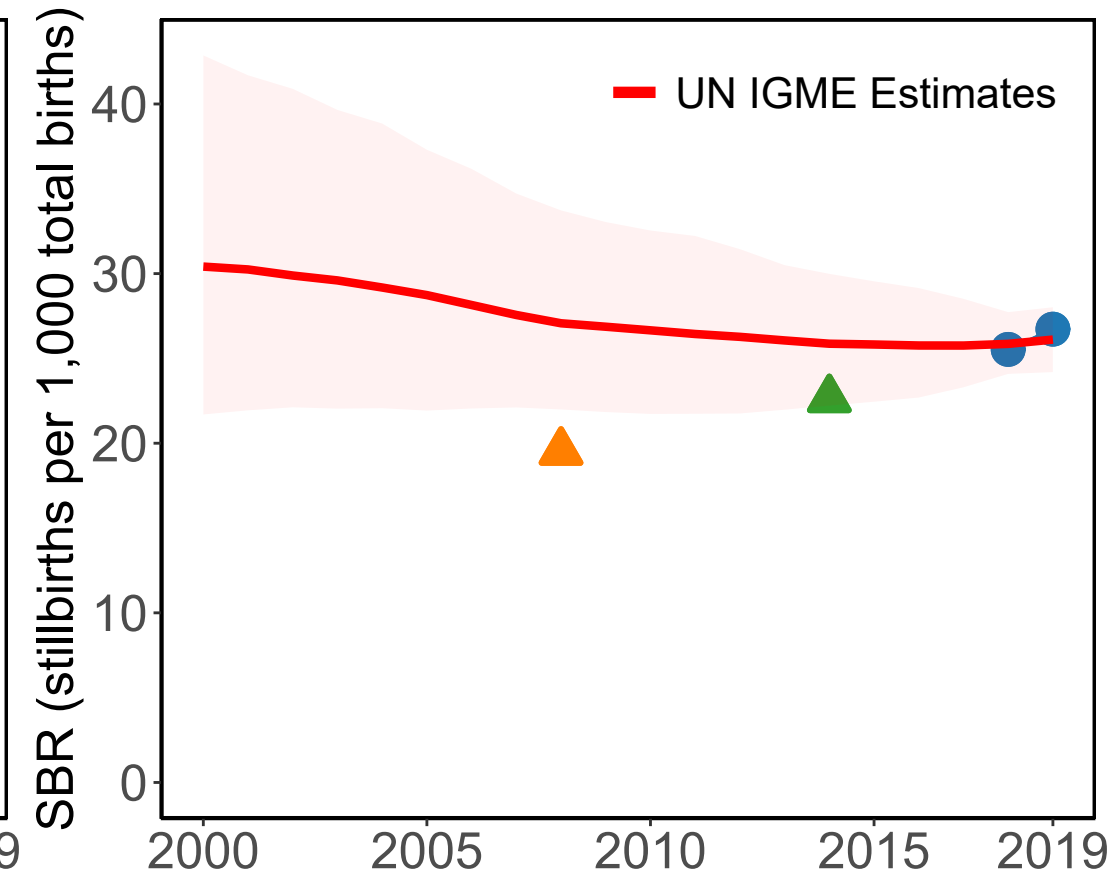

#### Source Types

○ HMIS   △ Survey

#### Data Sources

● HMIS-DHIS2 (28wks)

▲ Enquête démographique et de santé 2016-17 (DHS) (RC) (28wks)

▲ Enquête démographique et de santé 2010 (DHS) (RC) (28wks)

# Belgium

### Available Data

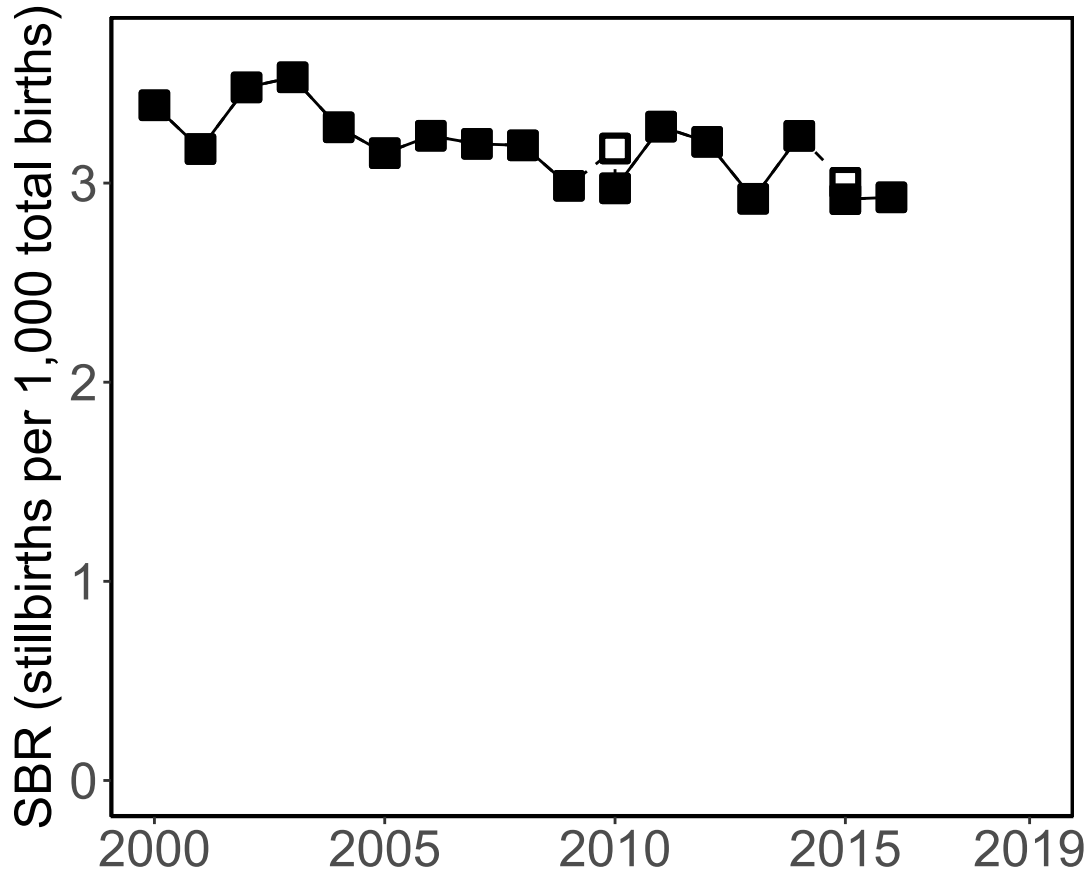

### '28+ Weeks of Gestation' Data (Incl. Adjusted Data)

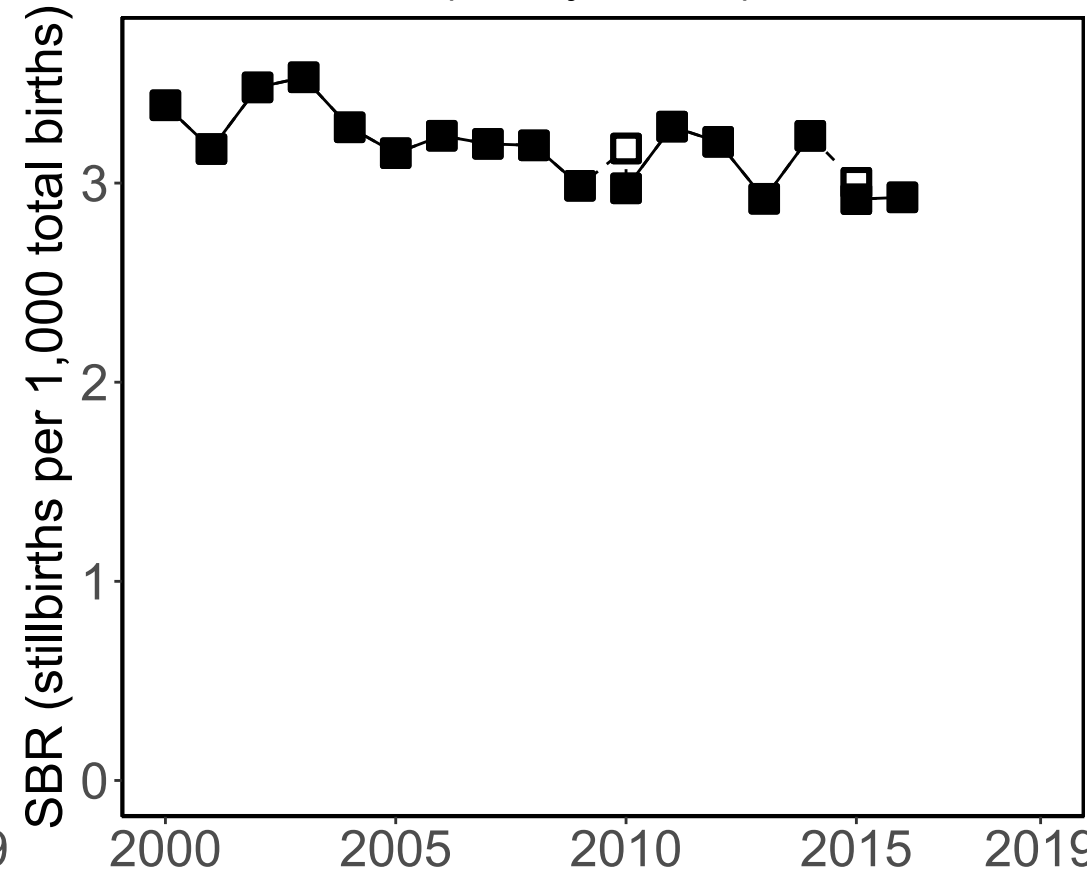

### Data Included in the Model

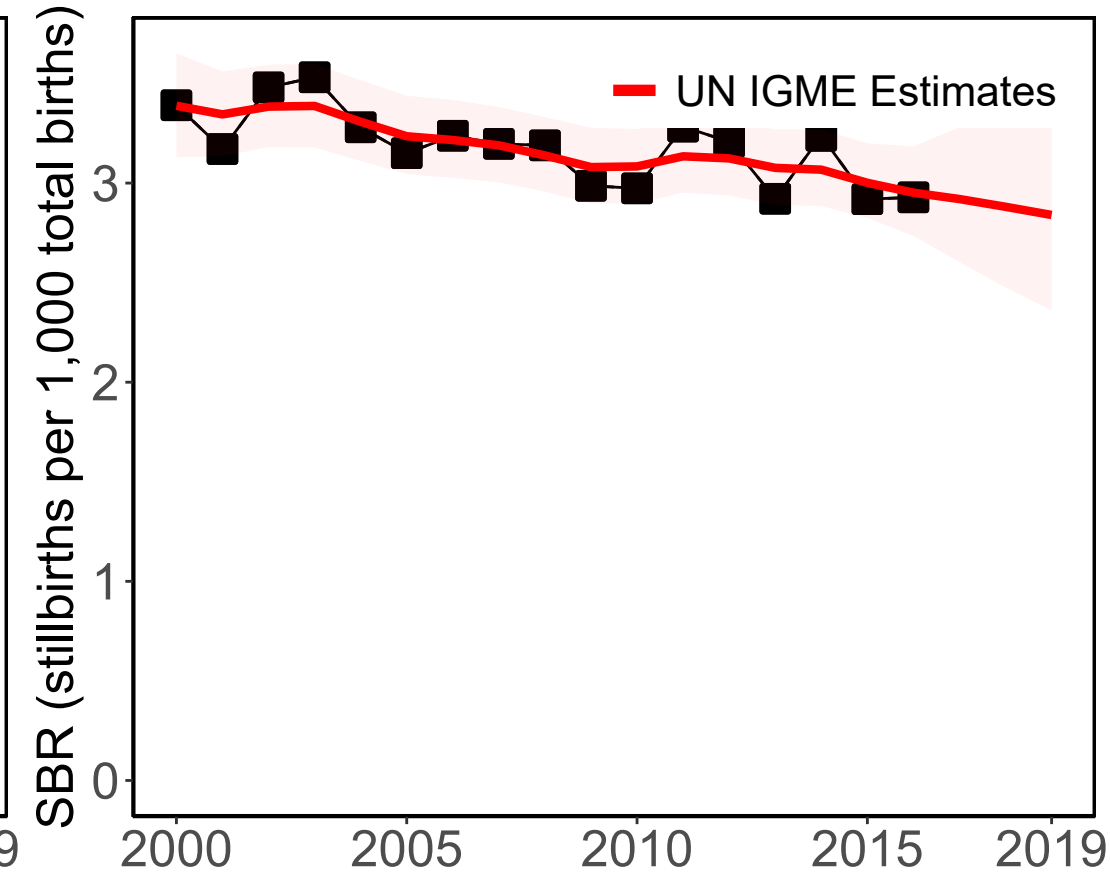

#### Source Types

□ Administrative

#### Data Sources

■ Vital Registration (28wks)



# Benin

Available Data

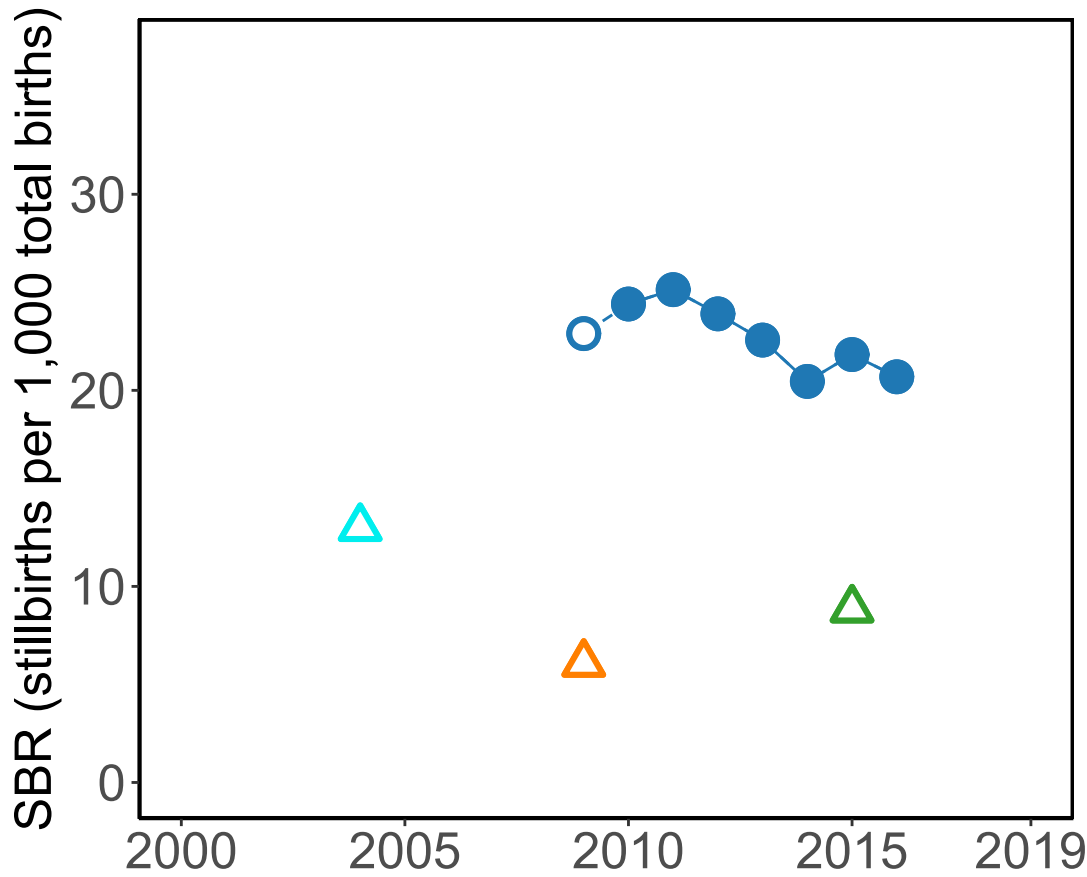

'28+ Weeks of Gestation' Data  
(Incl. Adjusted Data)

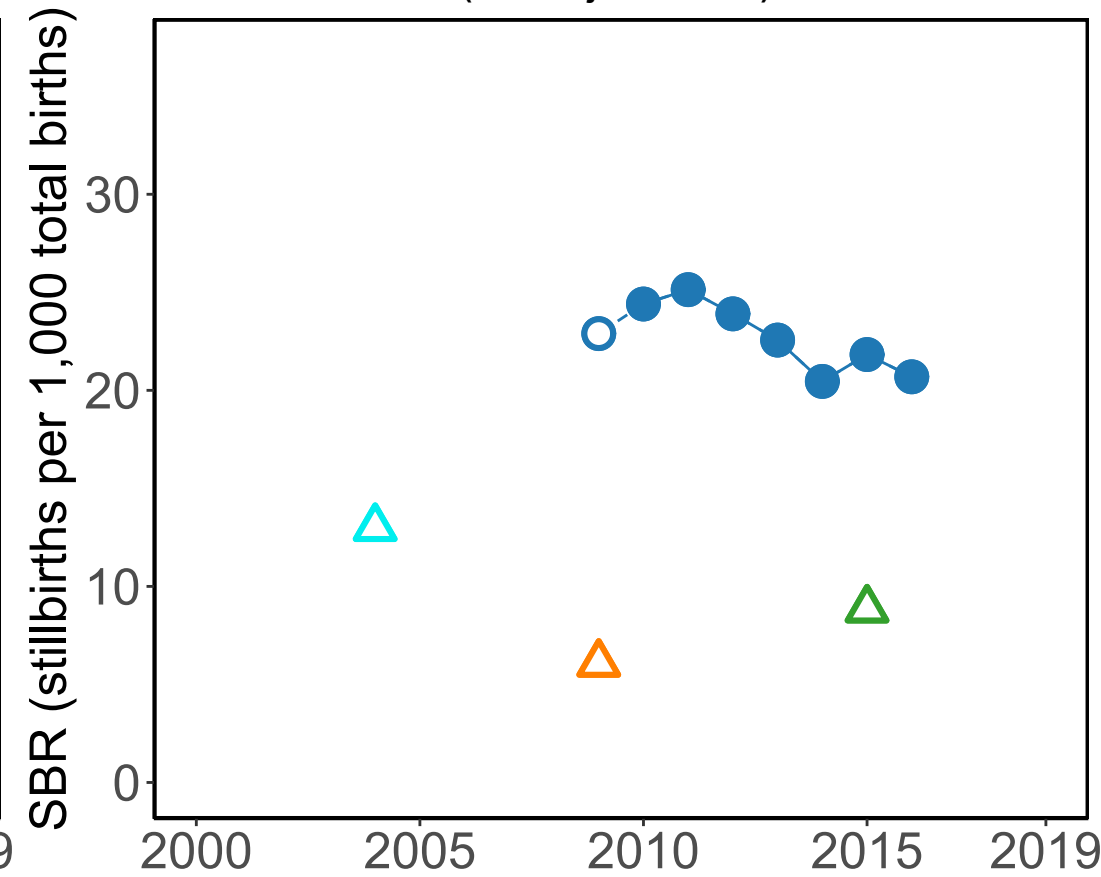

Data Included in the Model

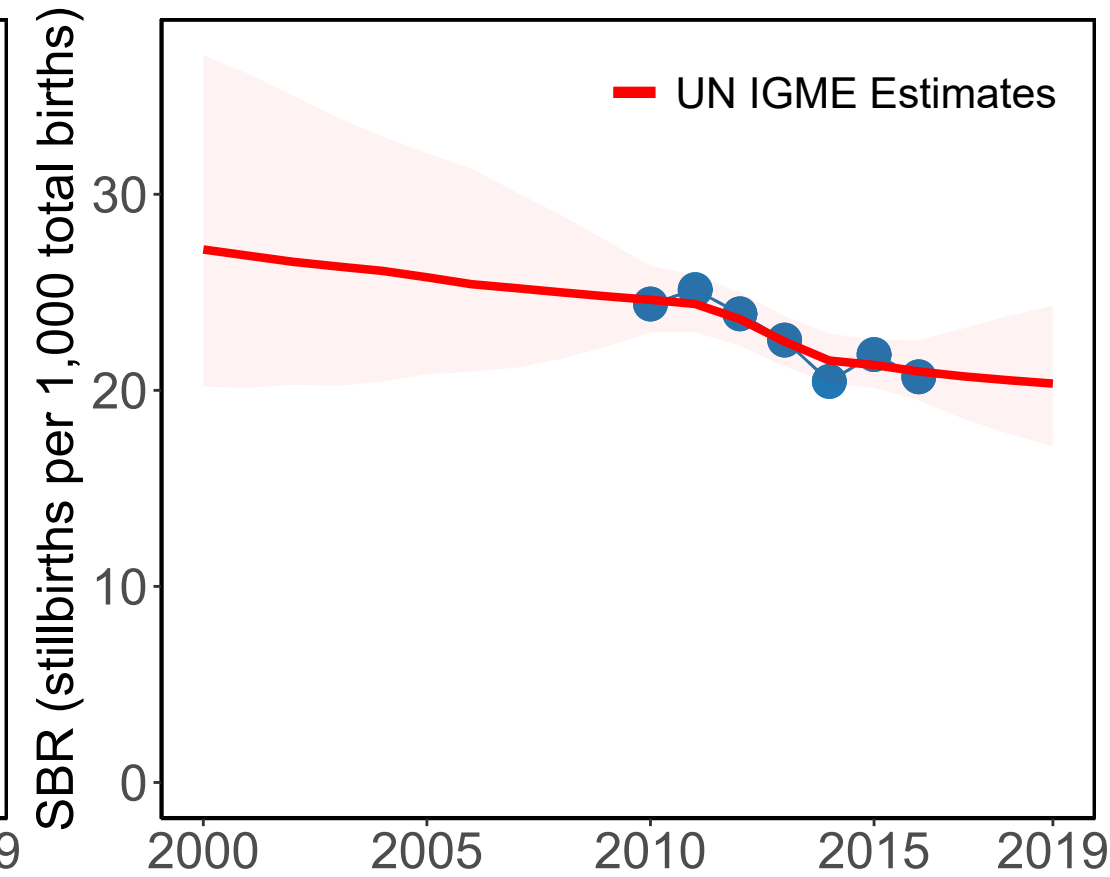

Source Types

○ HMIS △ Survey

Data Sources

● HMIS-DHIS2 (28wks)

△ Demographic and Health Survey 2017-18 (DHS) (RC) (28wks)

△ Demographic and Health Survey 2011-12 (DHS) (RC) (28wks)

△ Enquête démographique et de santé 2006 (DHS) (RC) (28wks)

# Burkina Faso

Available Data

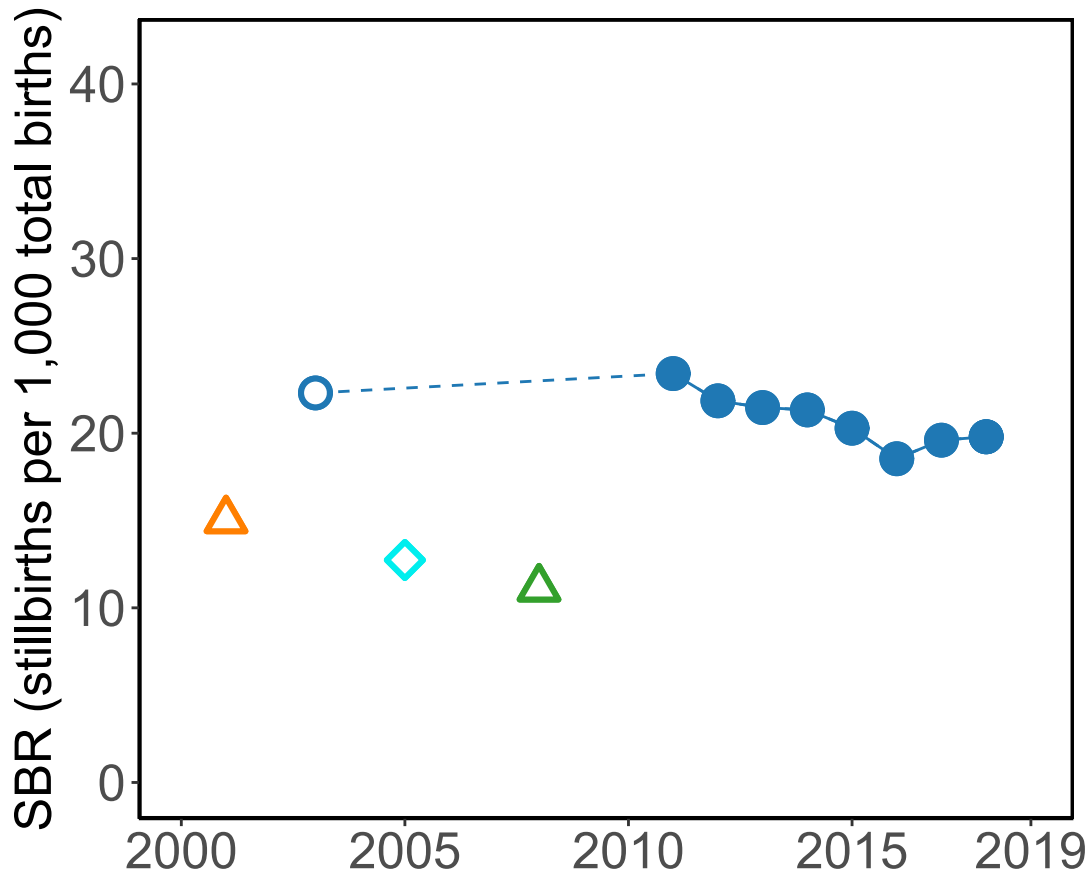

'28+ Weeks of Gestation' Data  
(Incl. Adjusted Data)

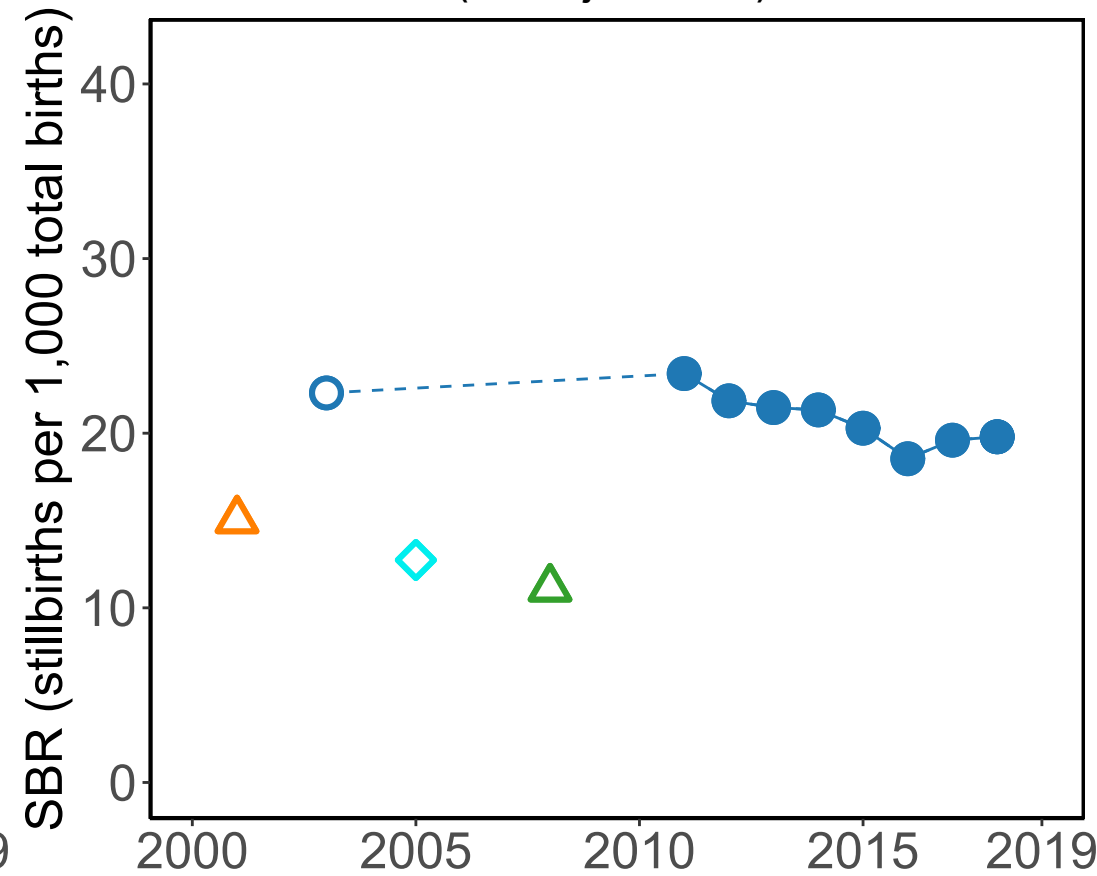

Data Included in the Model

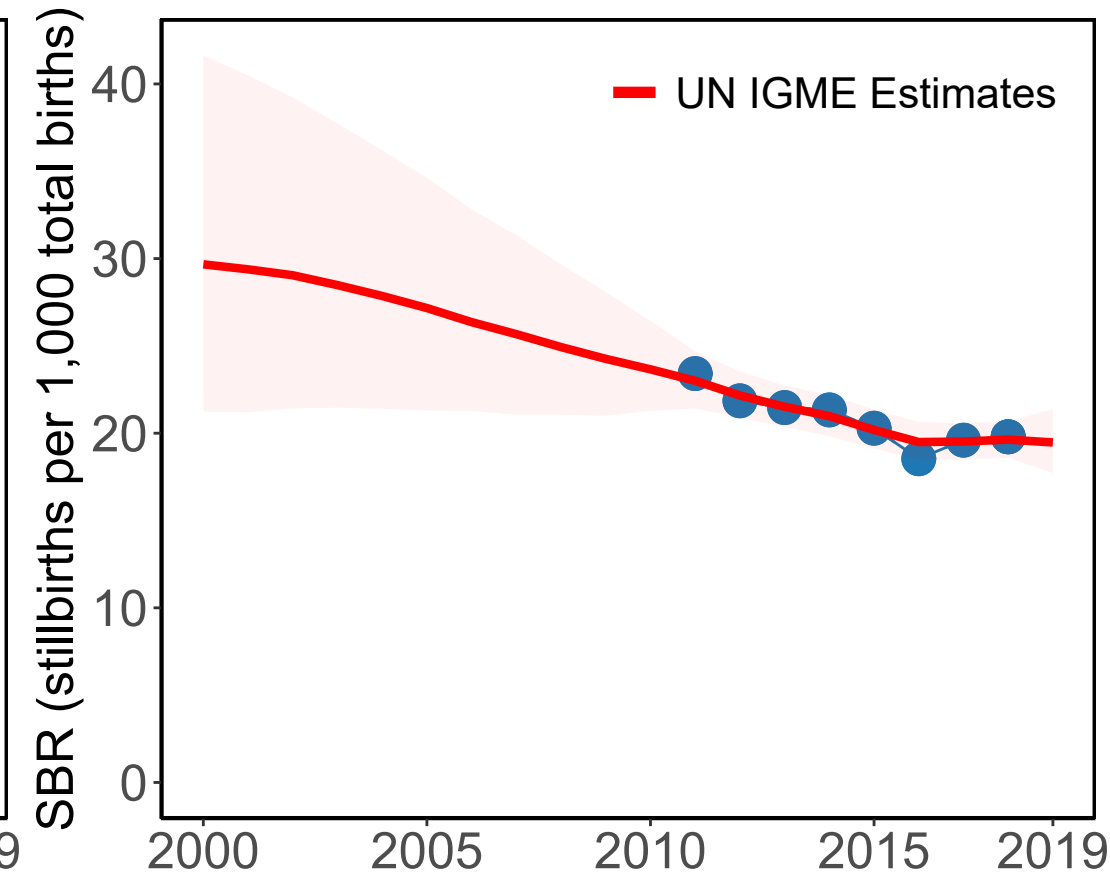

Source Types

- HMIS
- △ Survey
- ◇ Population study

Data Sources

- HMIS-DHIS2 (28wks)
- △ Enquête démographique et de santé et à Indicateurs Multiples 2010 (DHS) (RC) (28wks)
- △ Enquête démographique et de santé 2003 (DHS) (RC) (28wks)
- ◇ Roberfroid 2008 (28wks)

# Bangladesh

Available Data

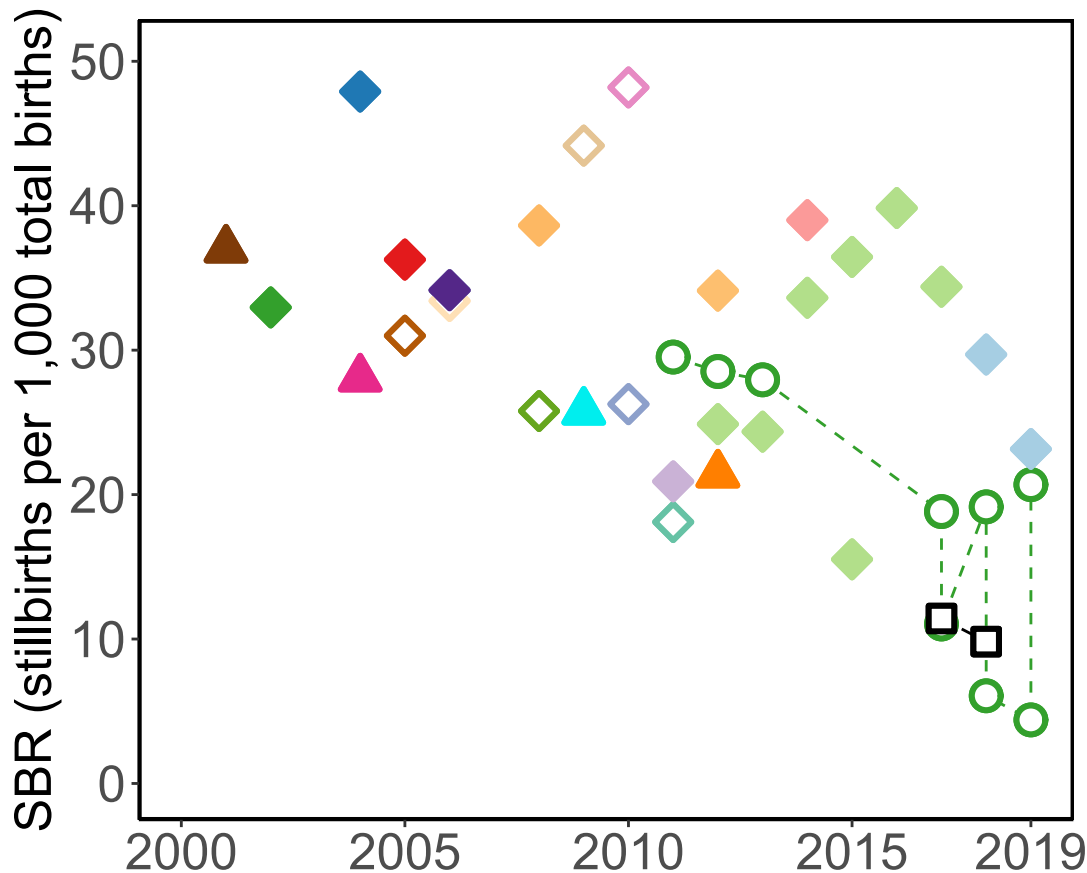

'28+ Weeks of Gestation' Data (Incl. Adjusted Data)

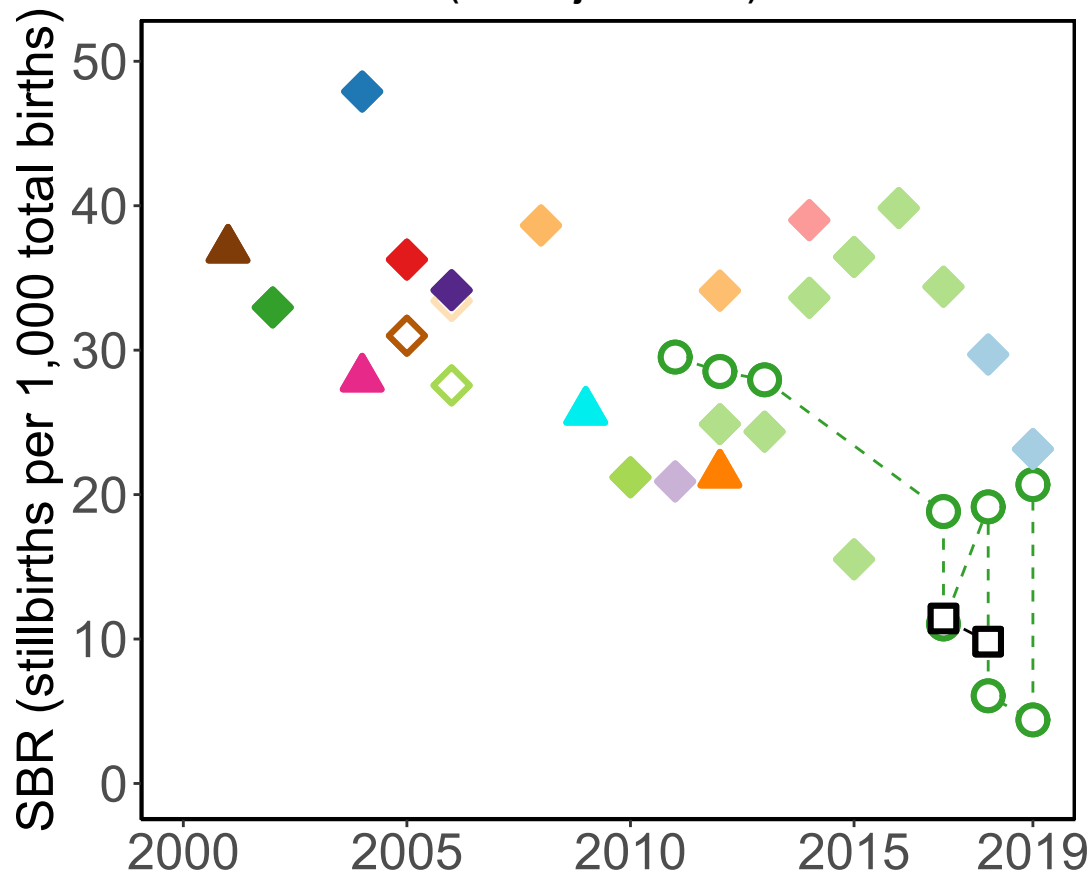

Data Included in the Model

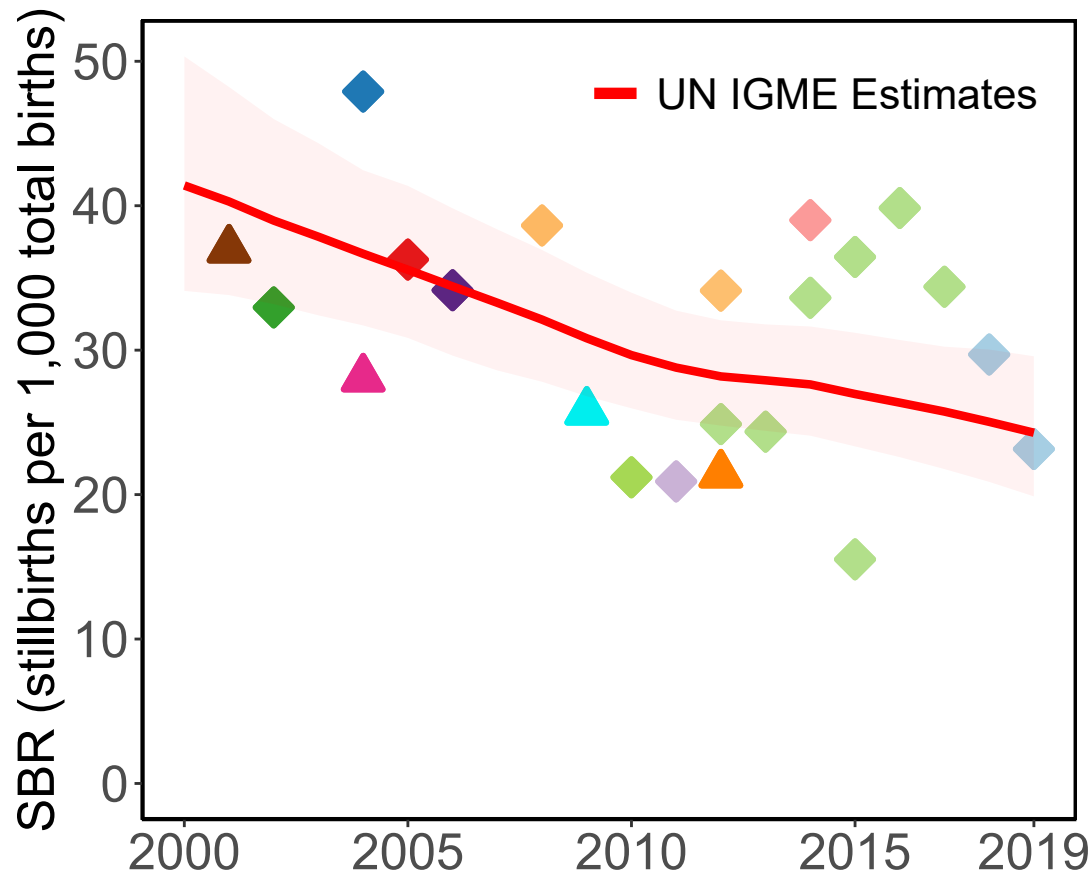

**Data Sources**

- Vital Registration (28wks)
- CHAMPS (28wks)
- Prost 2013 (28wks adj from 22wks)
- Azad 2010 (28wks)
- HMIS-DHIS2 (28wks)
- Hanifi (28wks)
- West 2014 (24wks)
- Ellis 2011 (28wks)
- Demographic and Health Survey 2014 (DHS) (RC) (28wks)
- AMANHI 2018 (28wks)
- Sikder 2014 (not defined)
- Baqui 2011 (28wks)
- Demographic and Health Survey 2011 (DHS) (RC) (28wks)
- Nelson 2018 (28wks)
- Nahar 2013 (1000g and 28wks)
- Khanam 2017 (28wks)
- Demographic and Health Survey 2007 (DHS) (RC) (28wks)
- Halim 2018 (28wks)
- Prost 2013 (22wks)
- West 2011 (28wks)
- Demographic and Health Survey 2004 (DHS) (RC) (28wks)
- Owais 2013 (not defined)
- Shah 2014 (28wks)
- Cherry 2008 (28wks)

**Source Types**

- Administrative
- HMIS
- Survey
- Population study

# Bulgaria

### Available Data

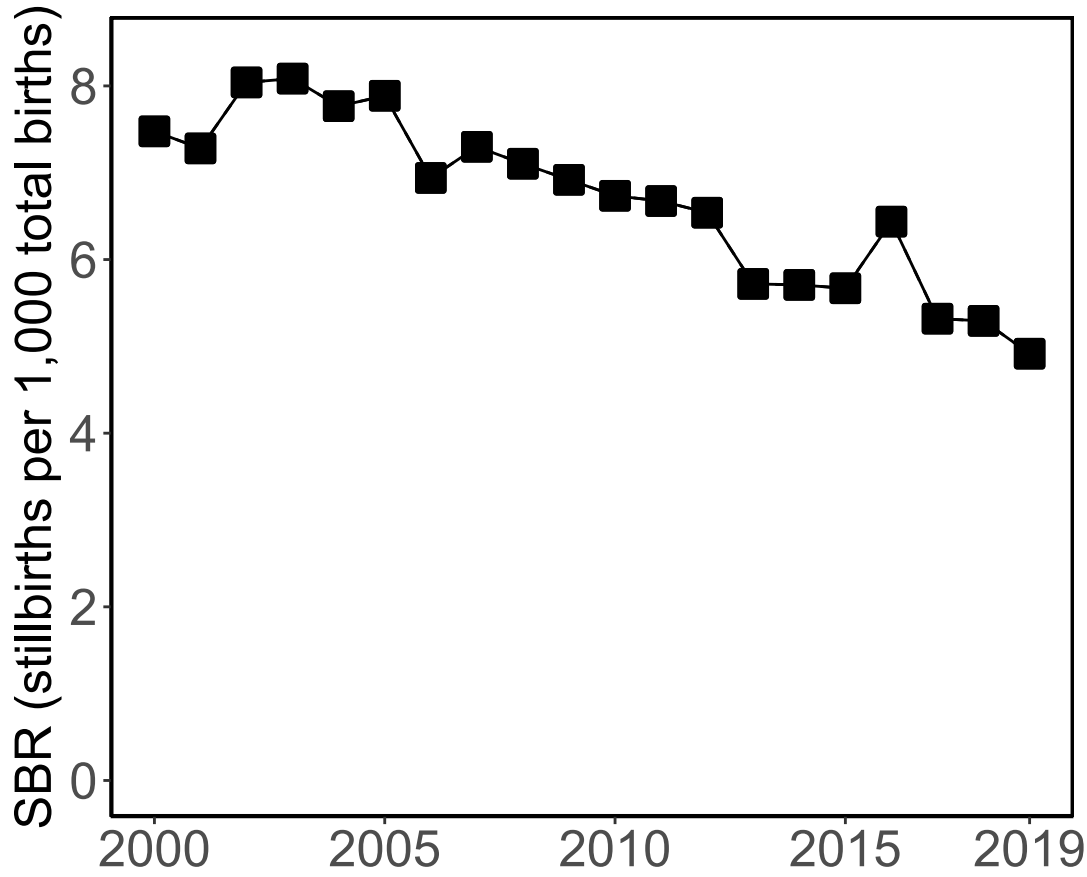

### '28+ Weeks of Gestation' Data (Incl. Adjusted Data)

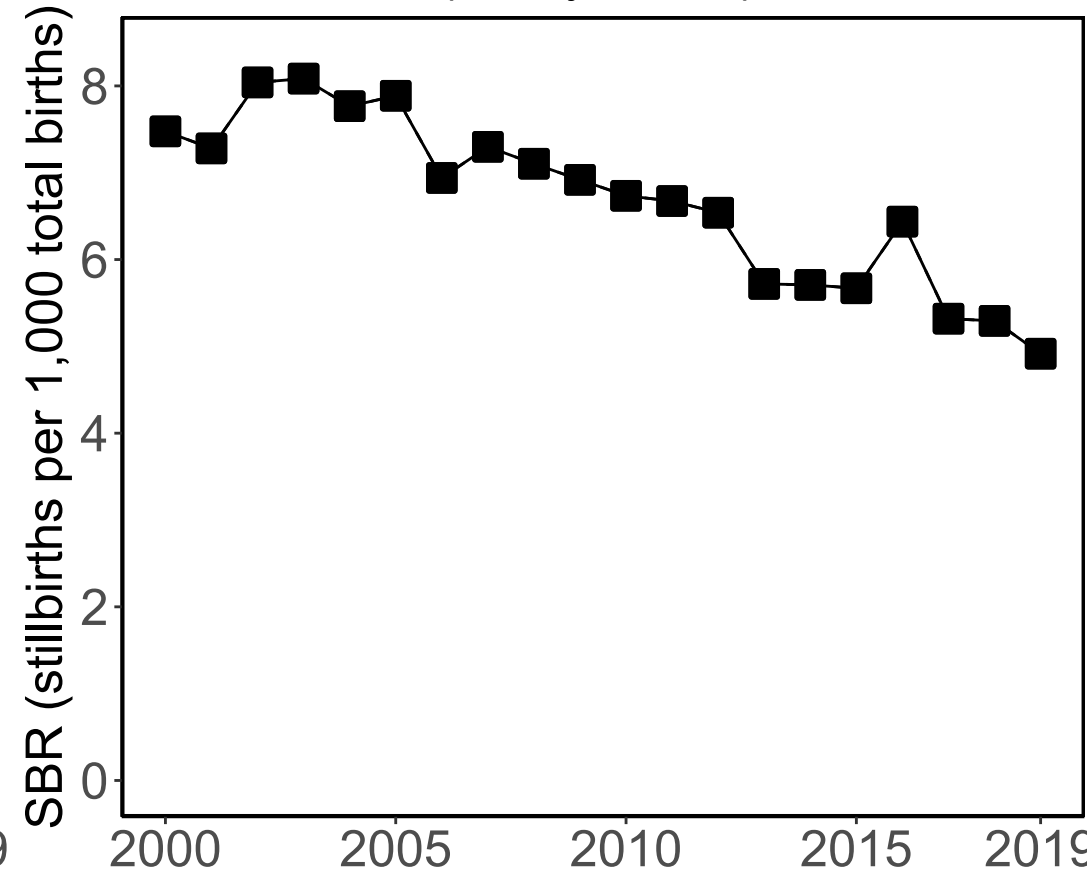

### Data Included in the Model

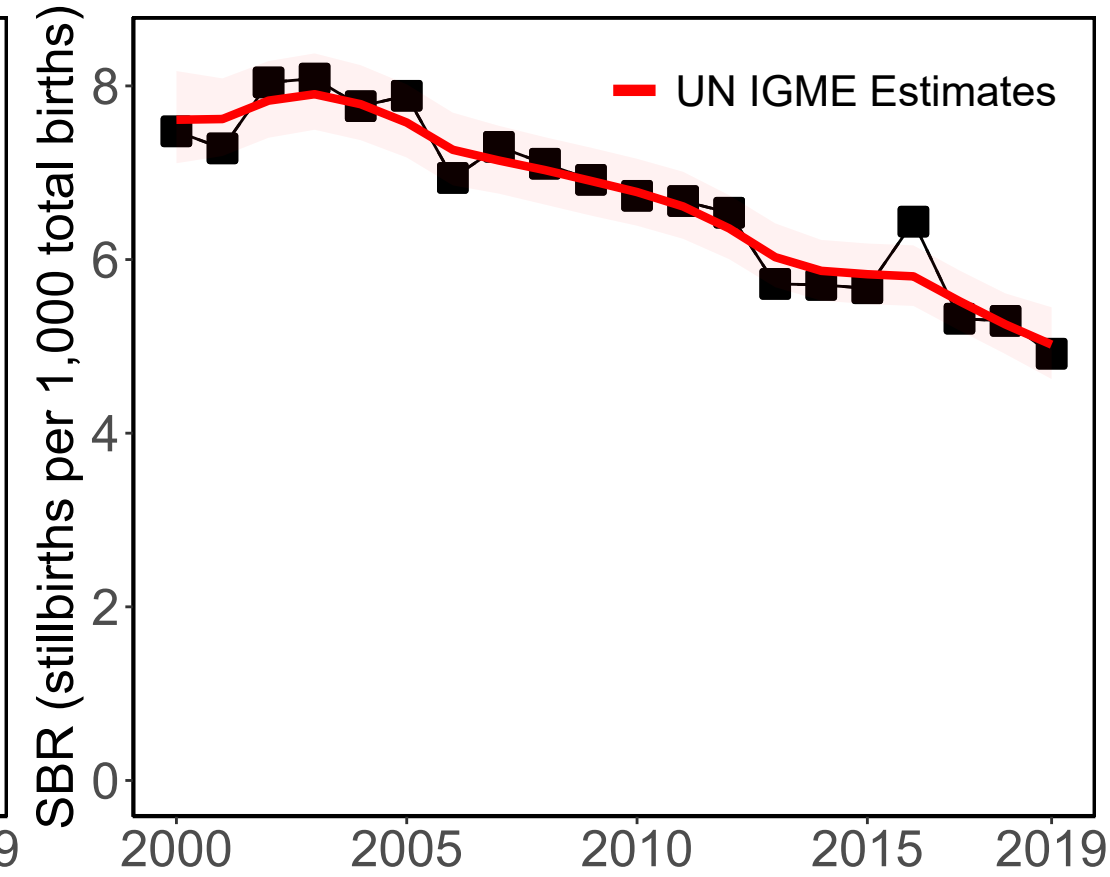

#### Source Types

□ Administrative

#### Data Sources

■ Vital Registration (28wks)

# Bahrain

### Available Data

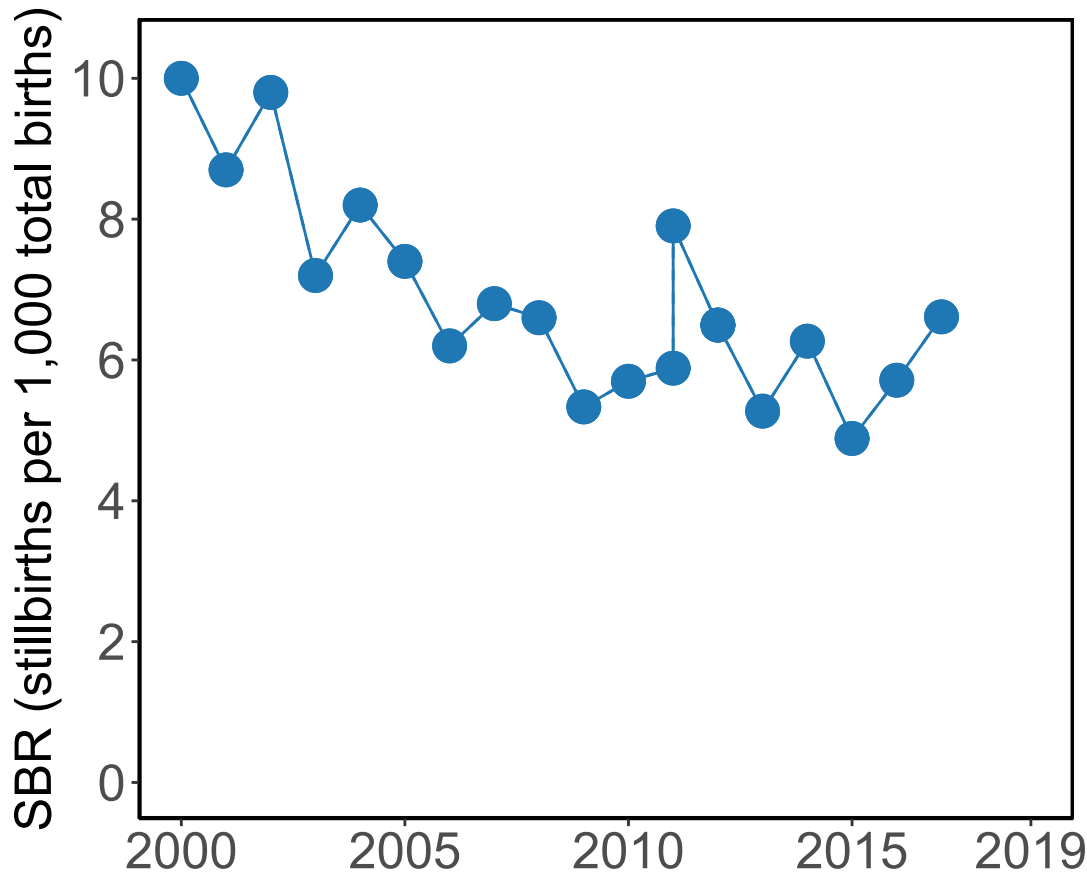

### '28+ Weeks of Gestation' Data (Incl. Adjusted Data)

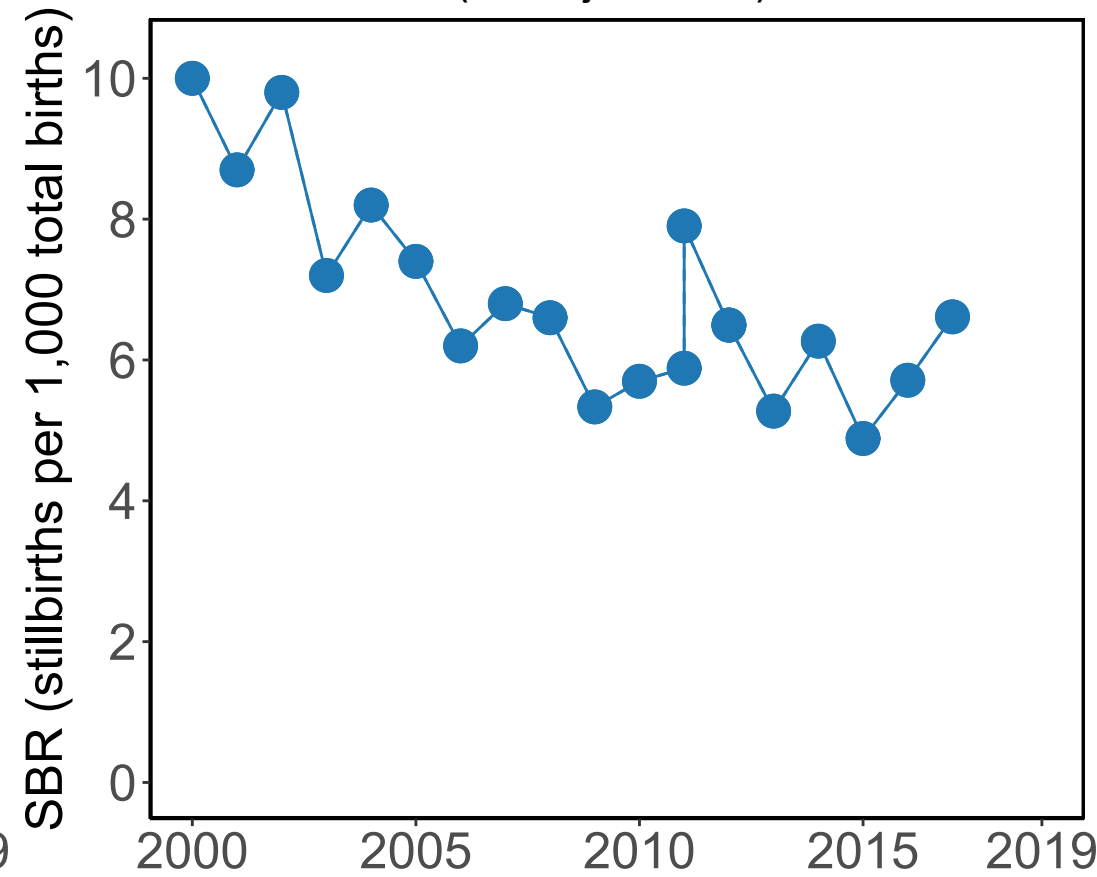

### Data Included in the Model

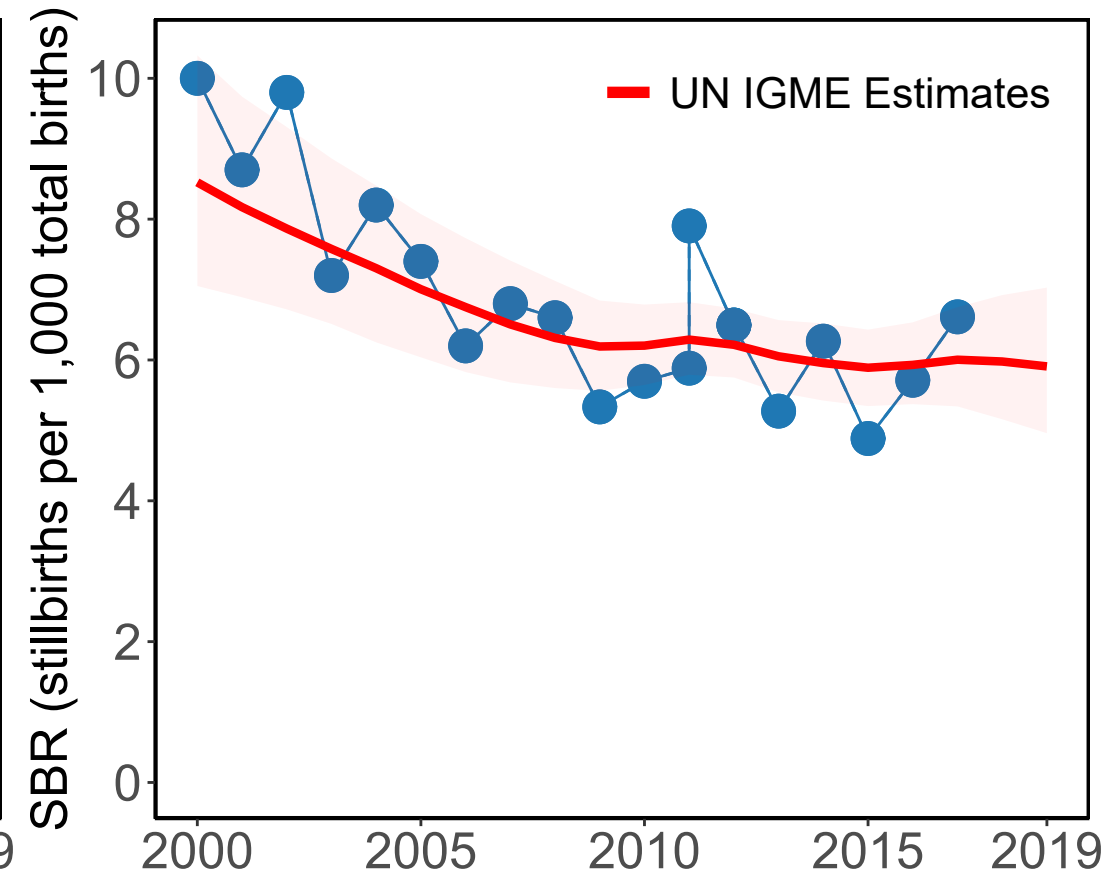

#### Source Types

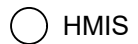

HMIS

#### Data Sources

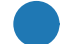

HMIS-DHIS2 (28wks)

# Bahamas

### Available Data

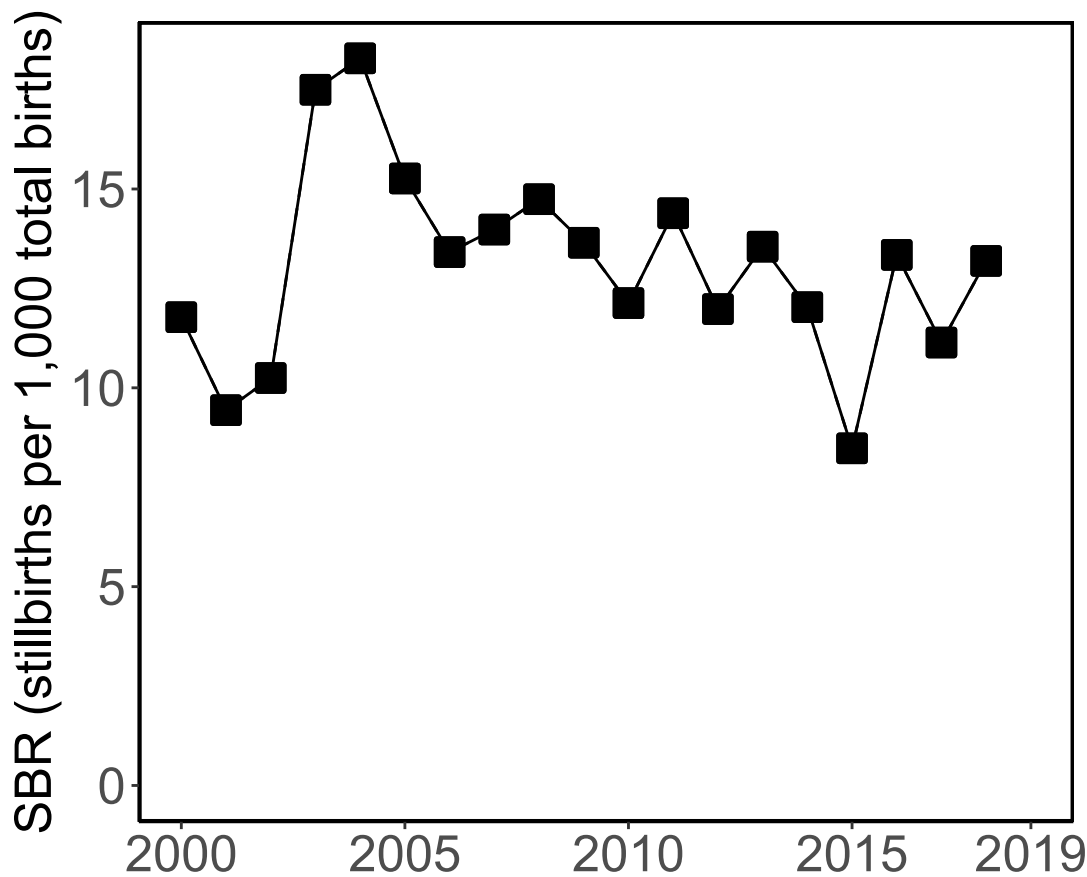

### '28+ Weeks of Gestation' Data (Incl. Adjusted Data)

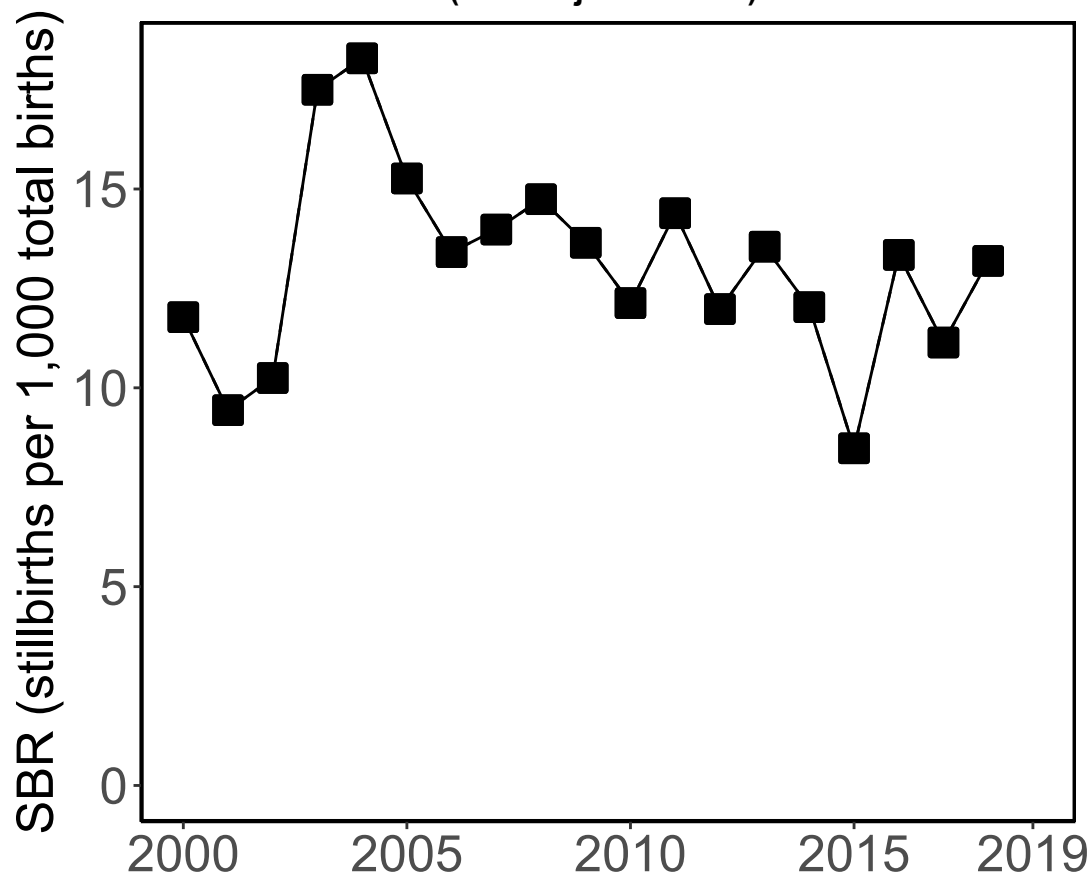

### Data Included in the Model

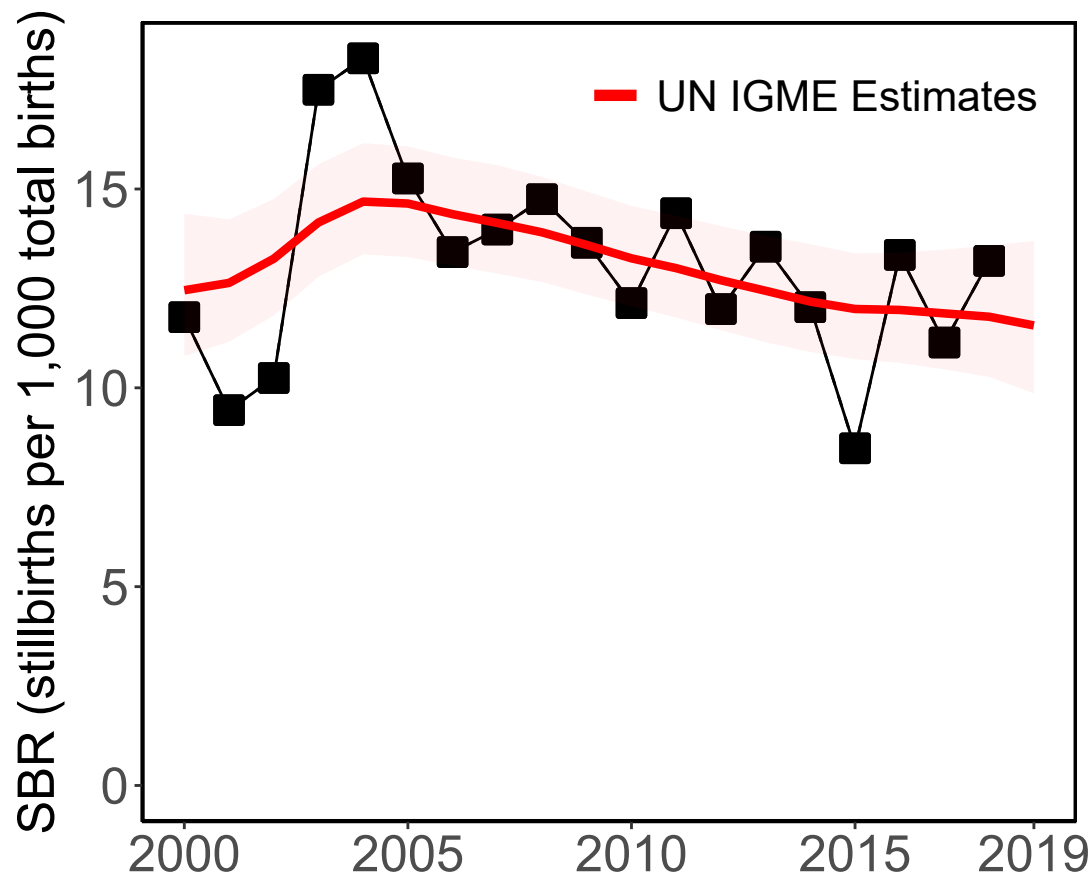

#### Source Types

□ Administrative

#### Data Sources

■ Vital Registration (28wks)

# Bosnia and Herzegovina

Available Data

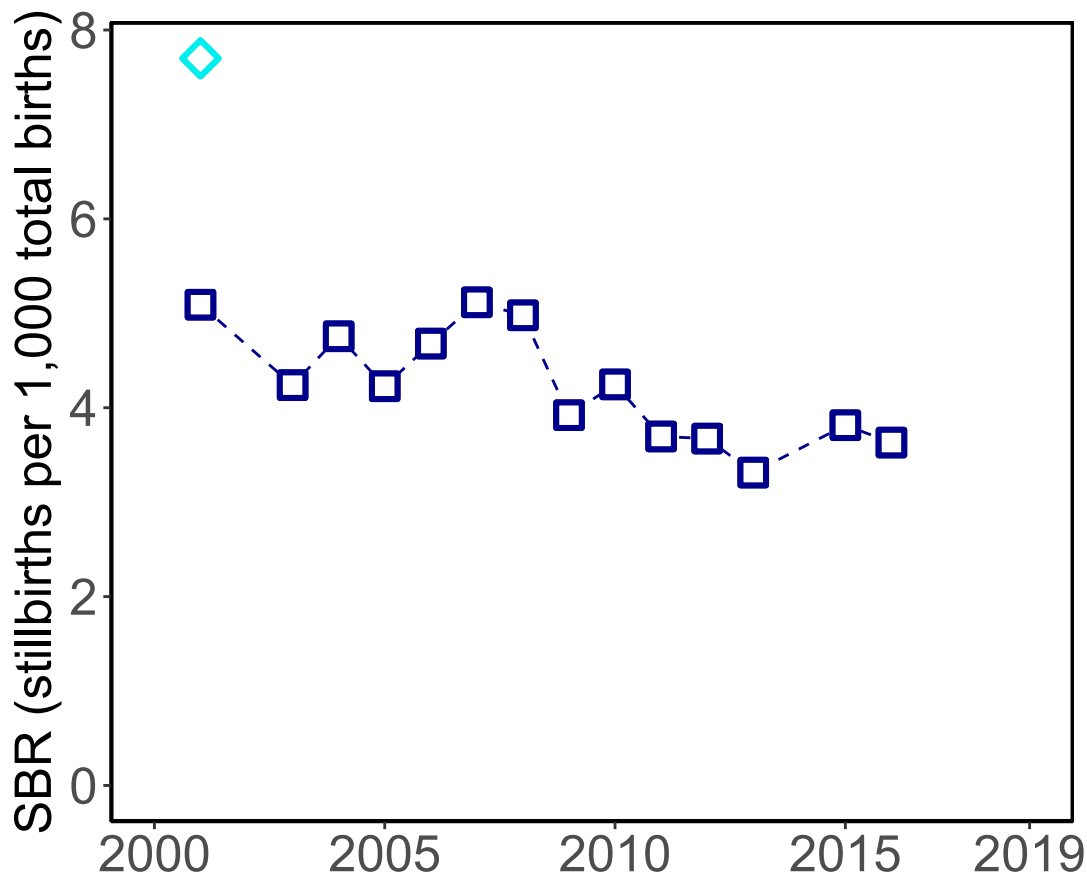

'28+ Weeks of Gestation' Data (Incl. Adjusted Data)

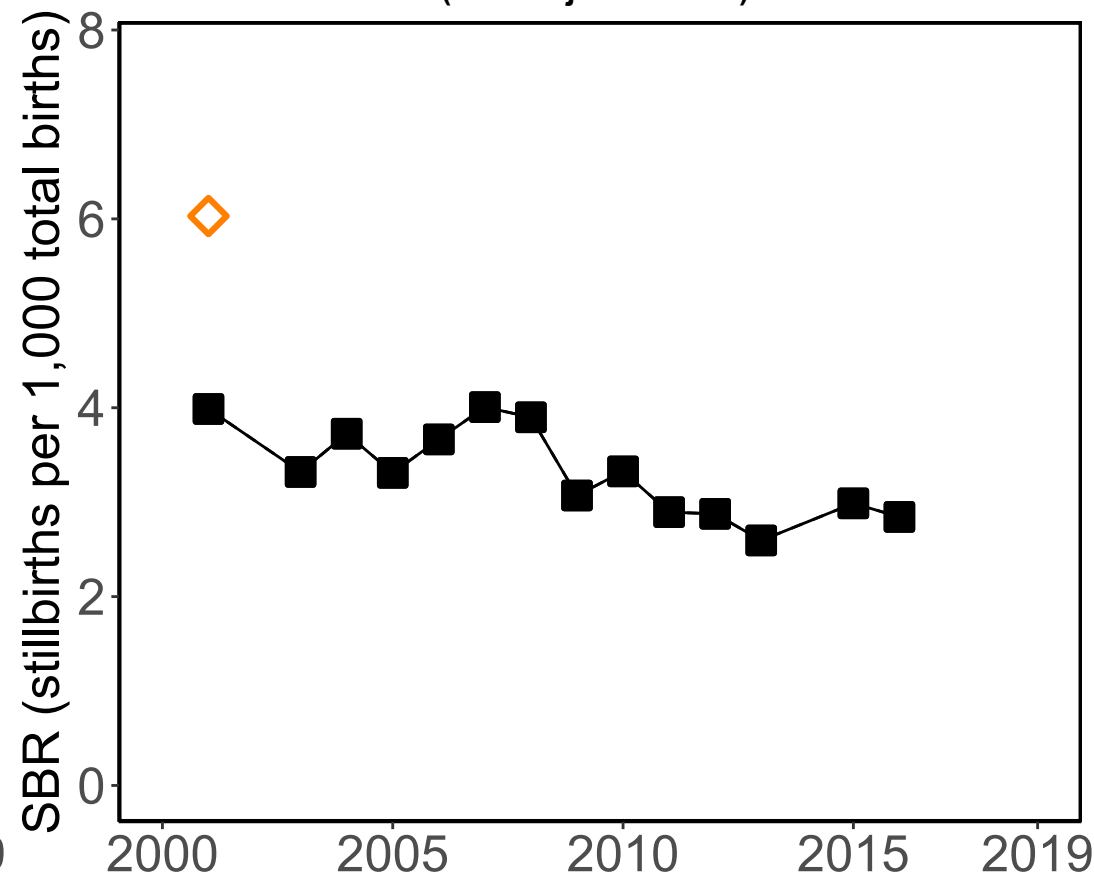

Data Included in the Model

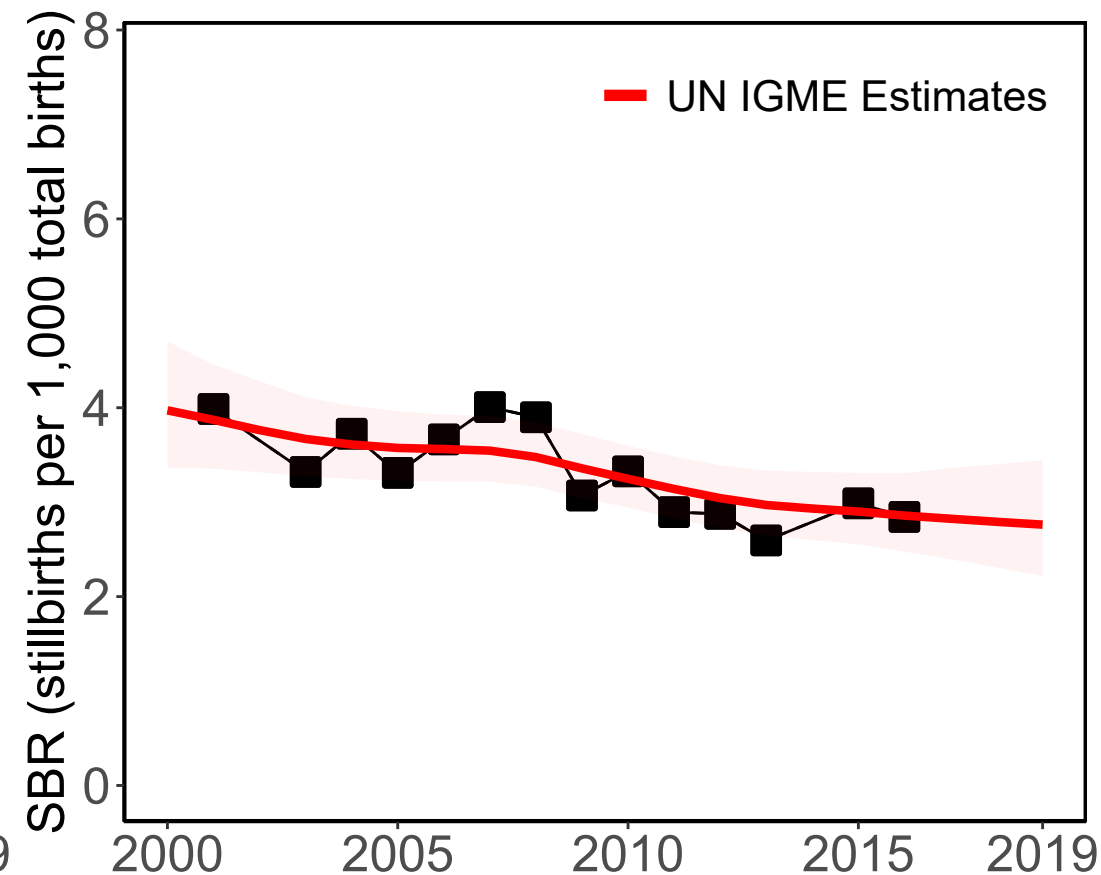

Source Types

- Administrative
- Population study

Data Sources

- Vital Registration (28wks adj from 500g)
- Vital Registration (500g)
- Skokic 2006 (28wks adj from 500g)
- Skokic 2006 (500g)

# Belarus

### Available Data

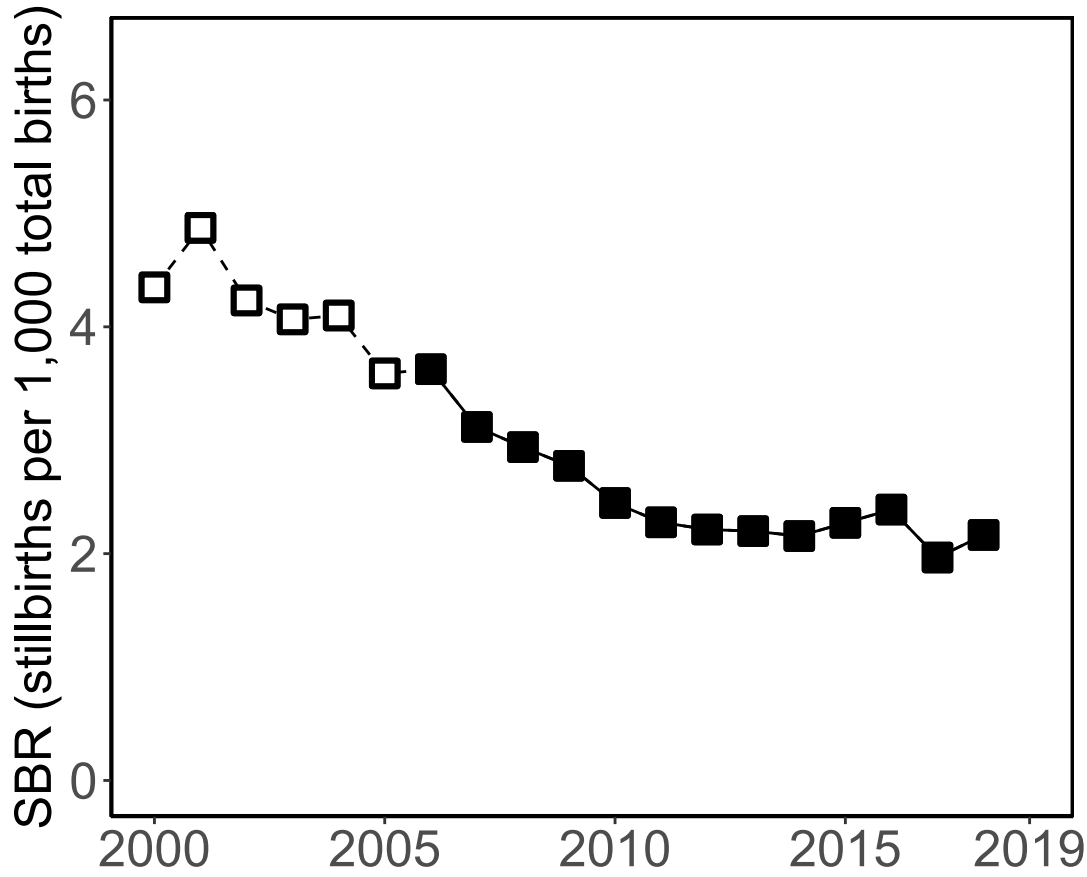

### '28+ Weeks of Gestation' Data (Incl. Adjusted Data)

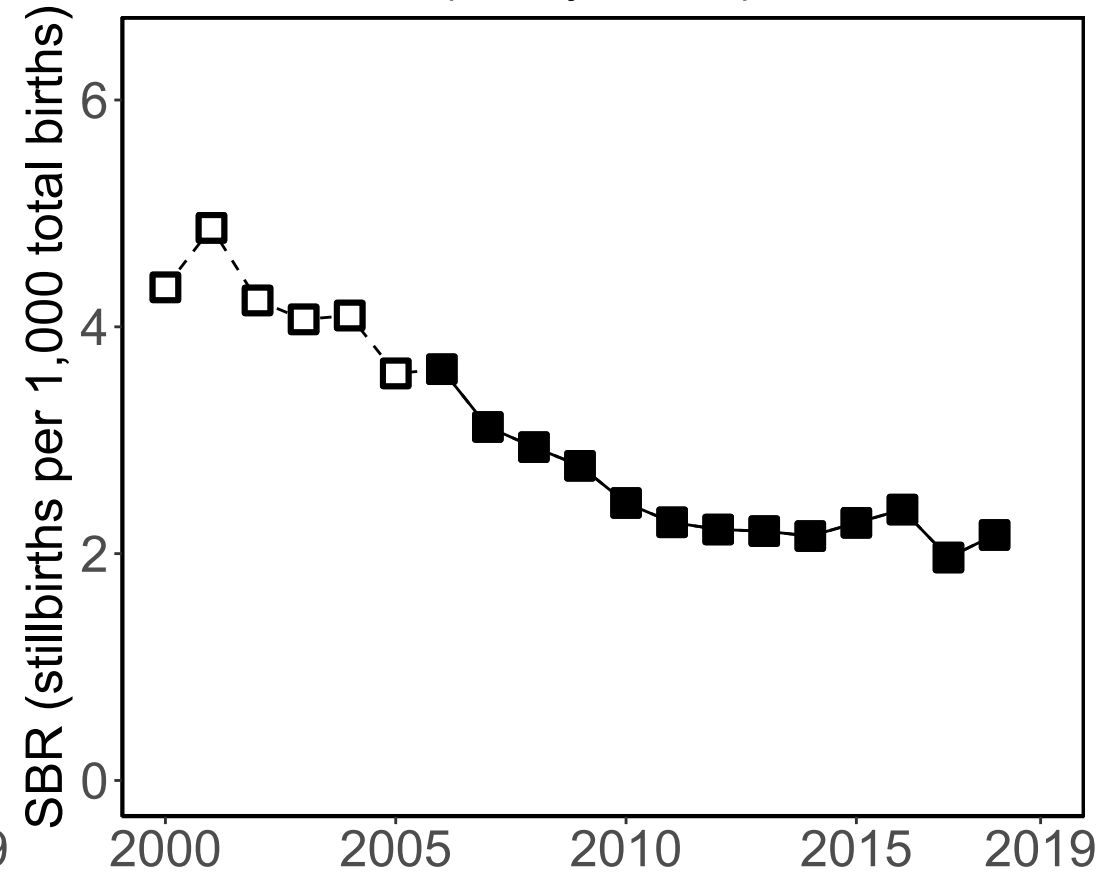

### Data Included in the Model

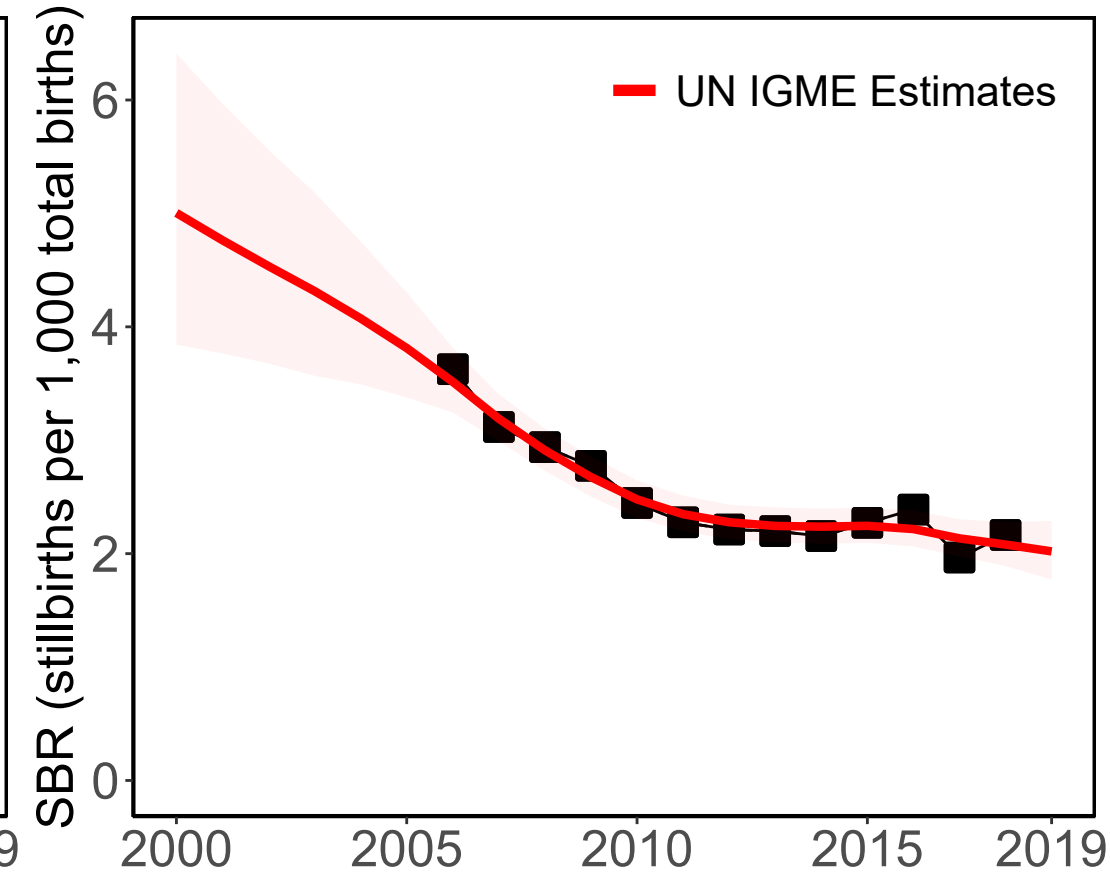

#### Source Types

□ Administrative

#### Data Sources

■ Vital Registration (28wks)

— UN IGME Estimates



# Belize

### Available Data

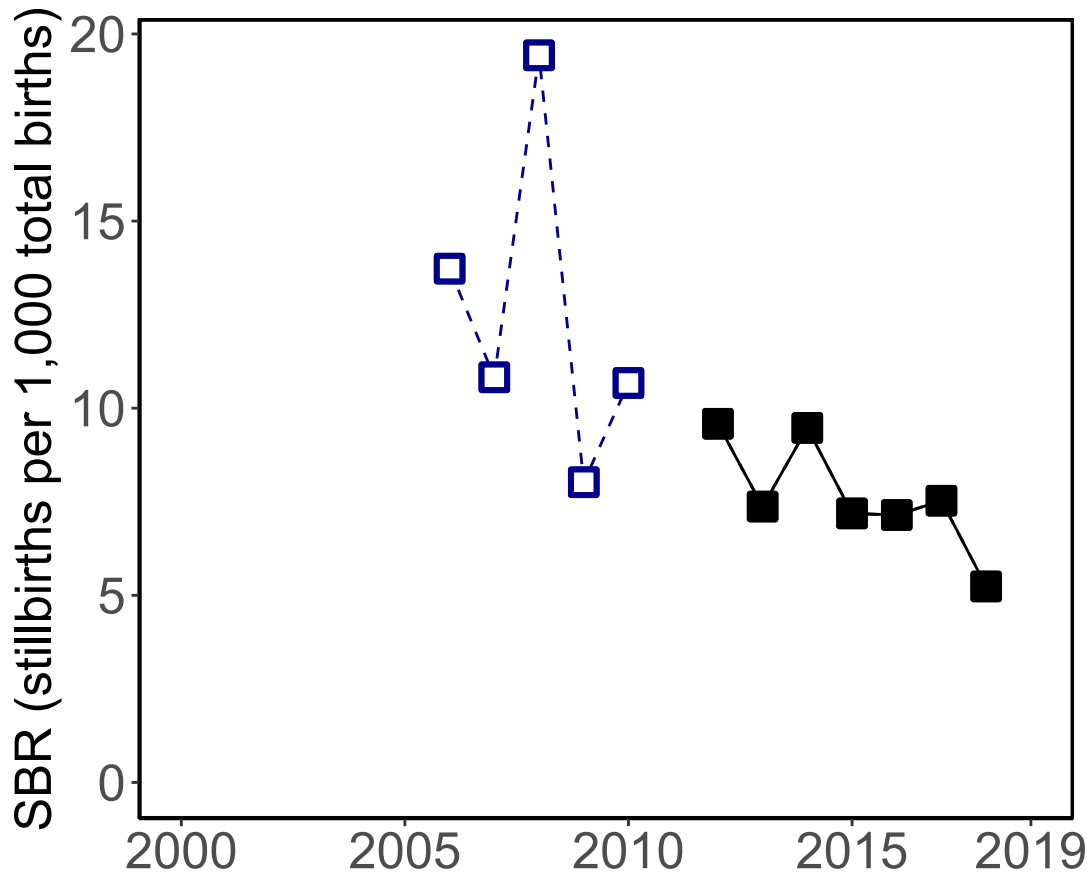

### '28+ Weeks of Gestation' Data (Incl. Adjusted Data)

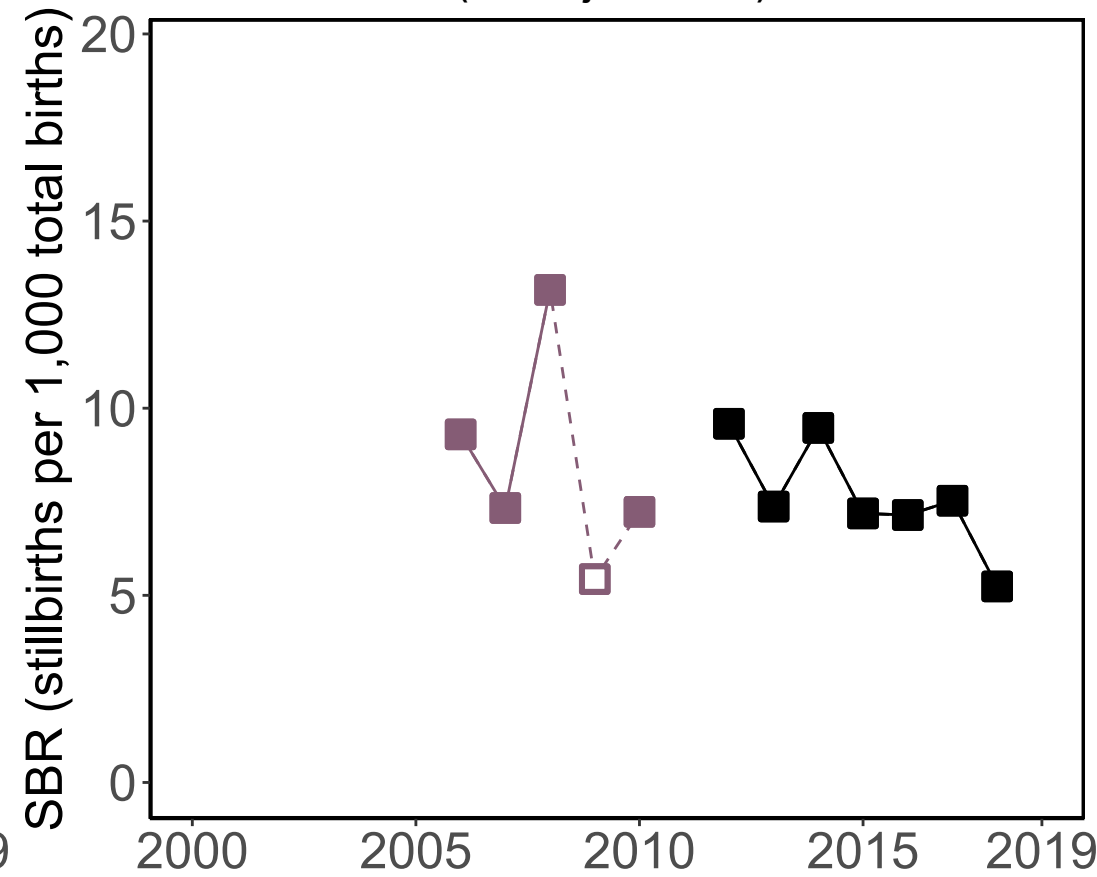

### Data Included in the Model

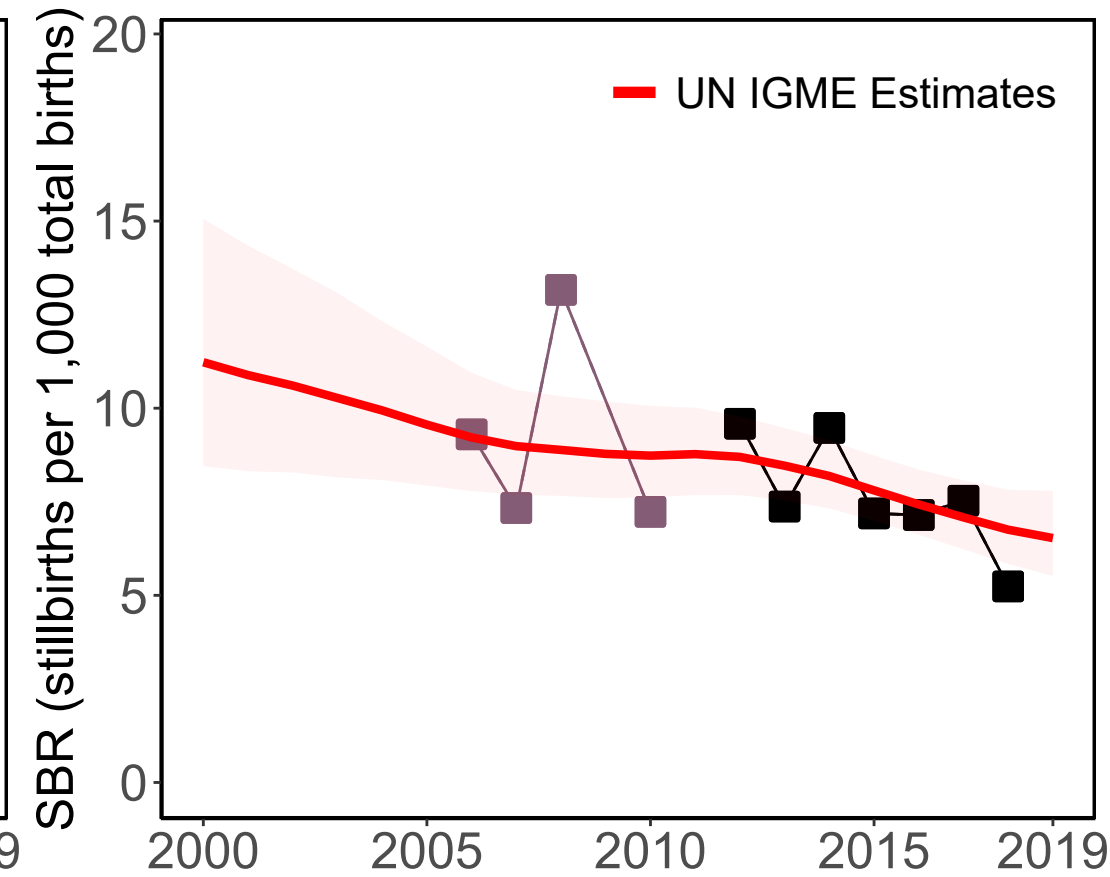

#### Source Types

□ Administrative

#### Data Sources

■ Vital Registration (28wks)

□ Vital Registration (22wks)

■ Vital Registration (28wks adj from 22wks)

# Bolivia

### Available Data

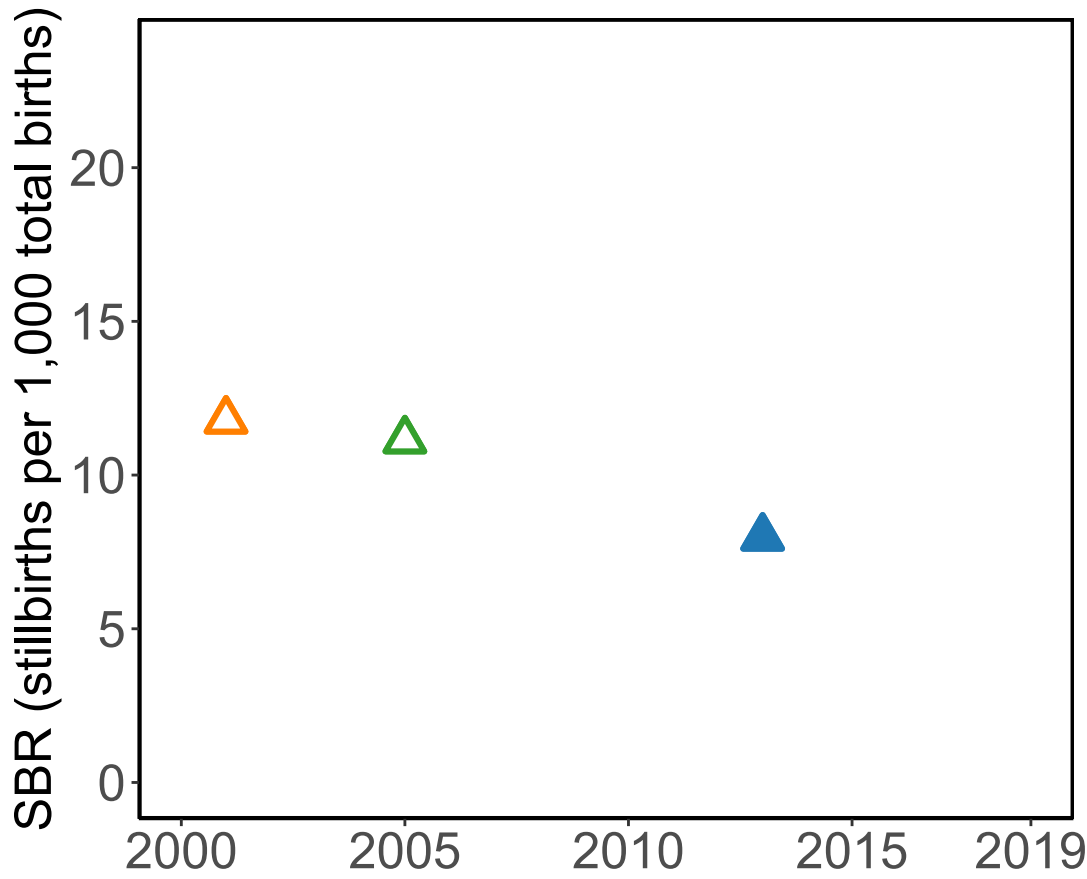

### '28+ Weeks of Gestation' Data (Incl. Adjusted Data)

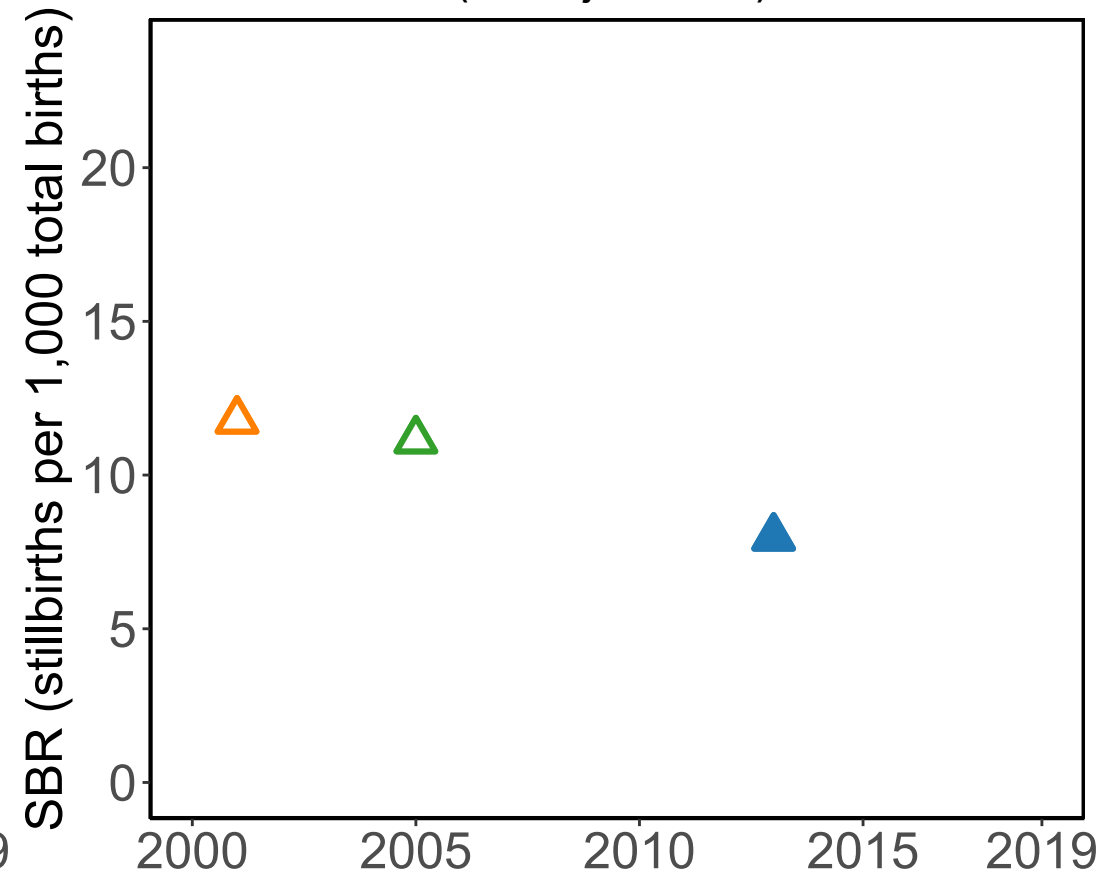

### Data Included in the Model

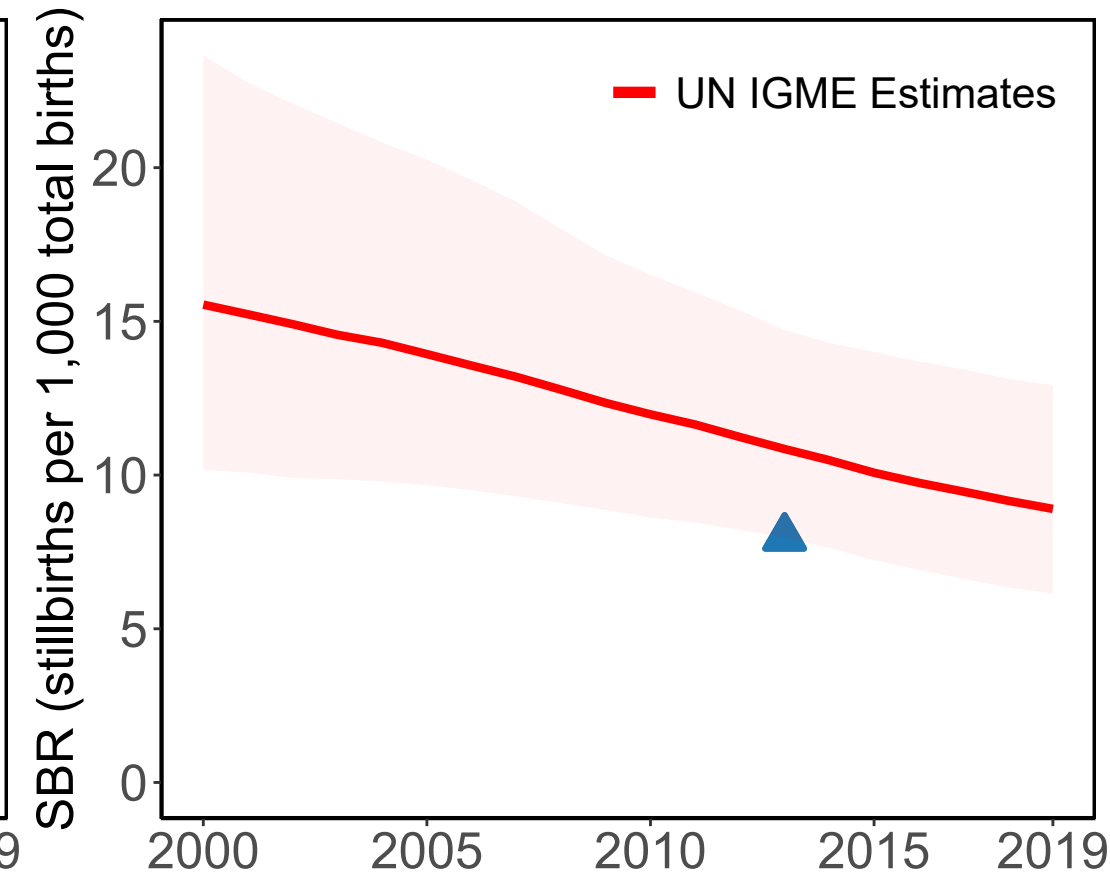

#### Source Types



Survey

#### Data Sources

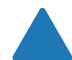

Demographic and Health Survey 2016 (DHS) (RC) (28wks)

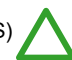

Encuesta Nacional de Demografía y Salud 2008 (DHS) (RC) (28wks)

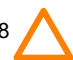

Encuesta Nacional de Demografía y Salud 2003 (DHS) (RC) (28wks)

UN IGME Estimates

# Brazil

Available Data

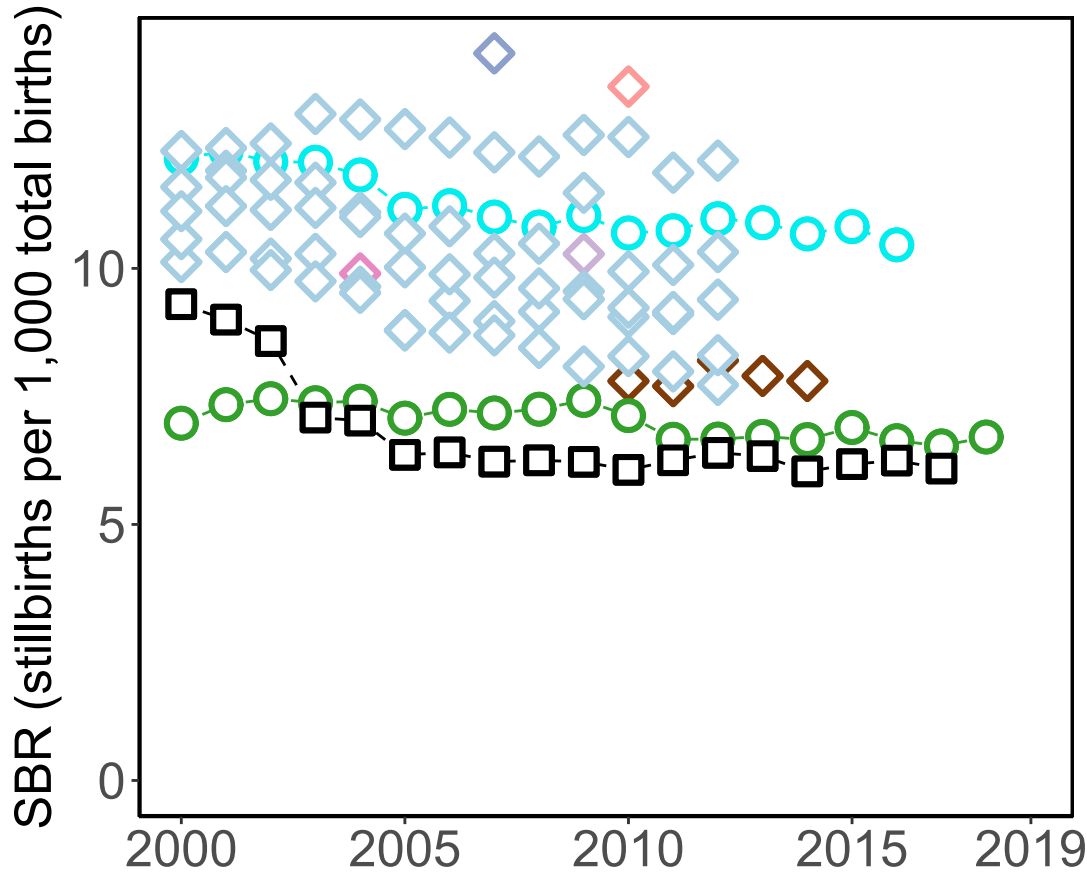

'28+ Weeks of Gestation' Data  
(Incl. Adjusted Data)

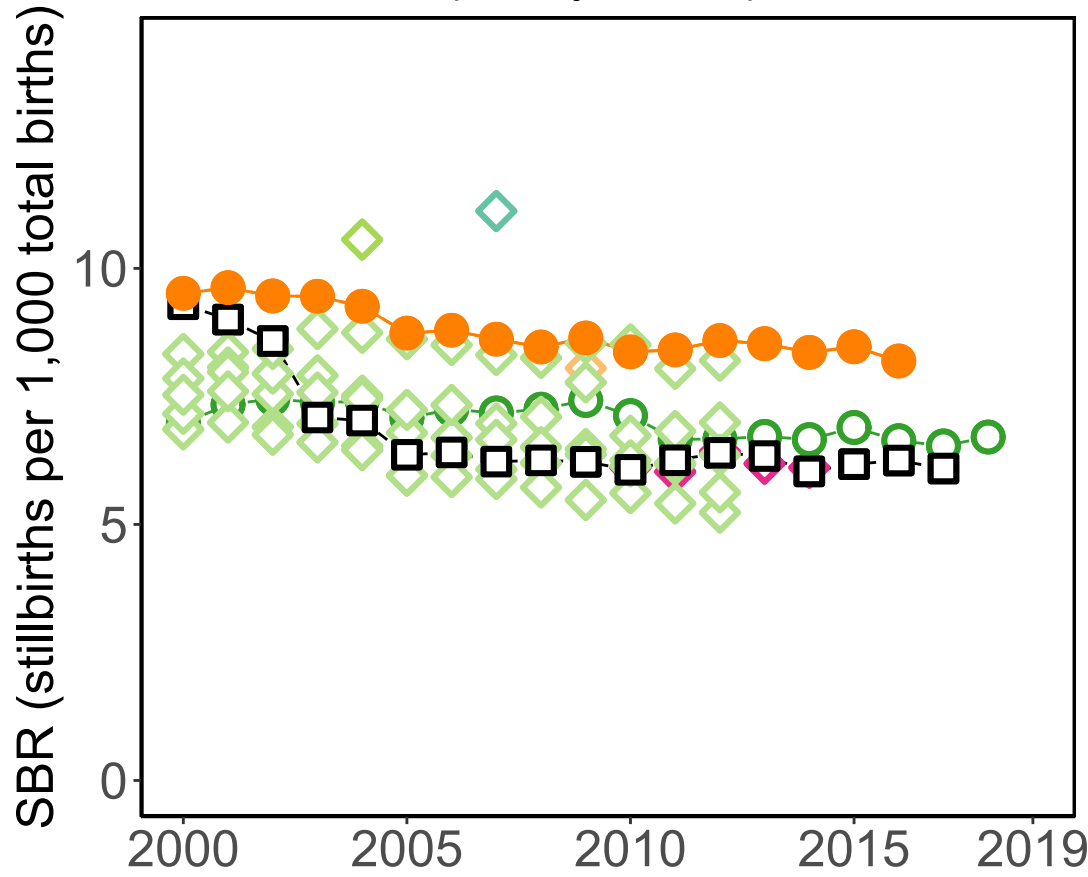

Data Included in the Model

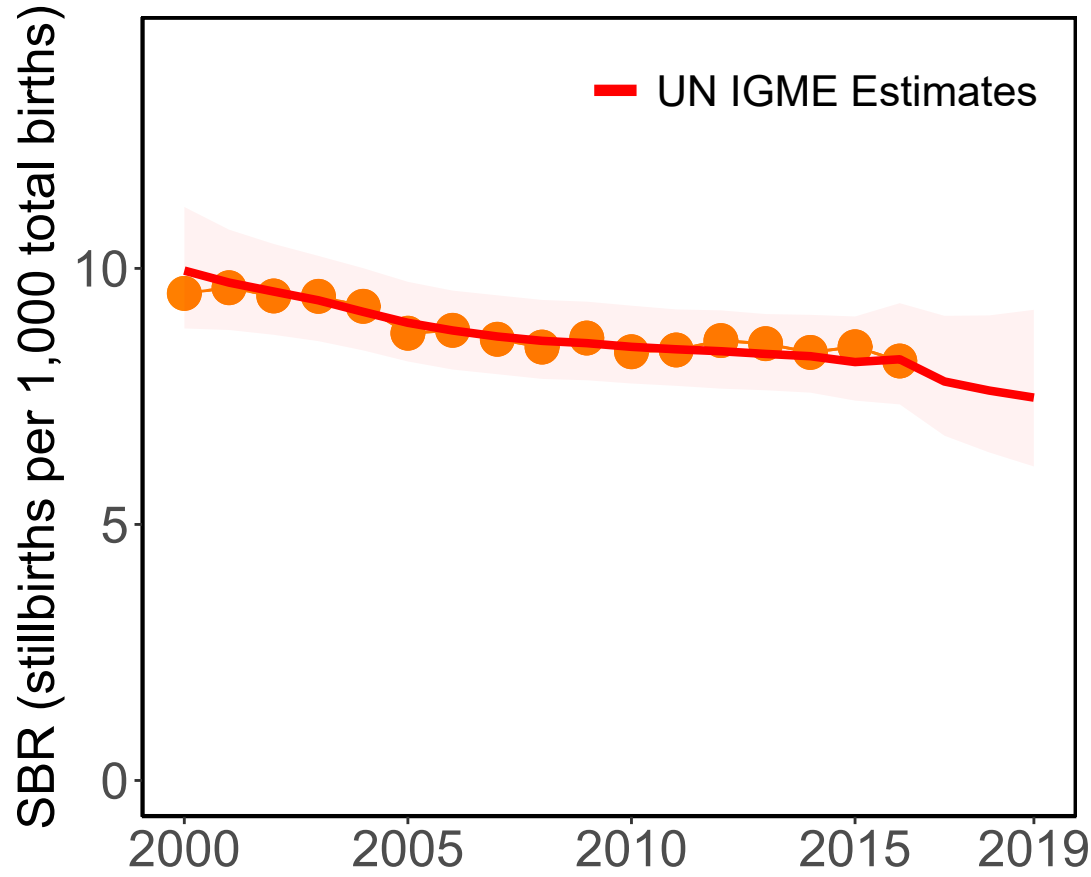

**Data Sources**

□ Vital Registration (28wks)

○ HMIS-DHIS2 (28wks)

● HMIS-DHIS2 (28wks adj from 500g)

○ HMIS-DHIS2 (500g)

◇ Andrews 2017 (28wks adj from 500g)

◇ Andrews 2017 (500g)

◇ Silva 2015 (500g or 20wks)

◇ Maria 2017 (28wks adj from 500g)

◇ Maria 2017 (500g)

◇ Nascimento 2017 (28wks adj from 500g)

◇ Nascimento 2017 (500g)

◇ Vieira 2016 (22wks)

◇ Vieira 2016 (28wks adj from 22wks)

◇ Barros 2005 (1000g)

◇ Barros 2005 (28wks adj from 1000g)

**Source Types**

□ Administrative ○ HMIS ◇ Population study

# Barbados

### Available Data

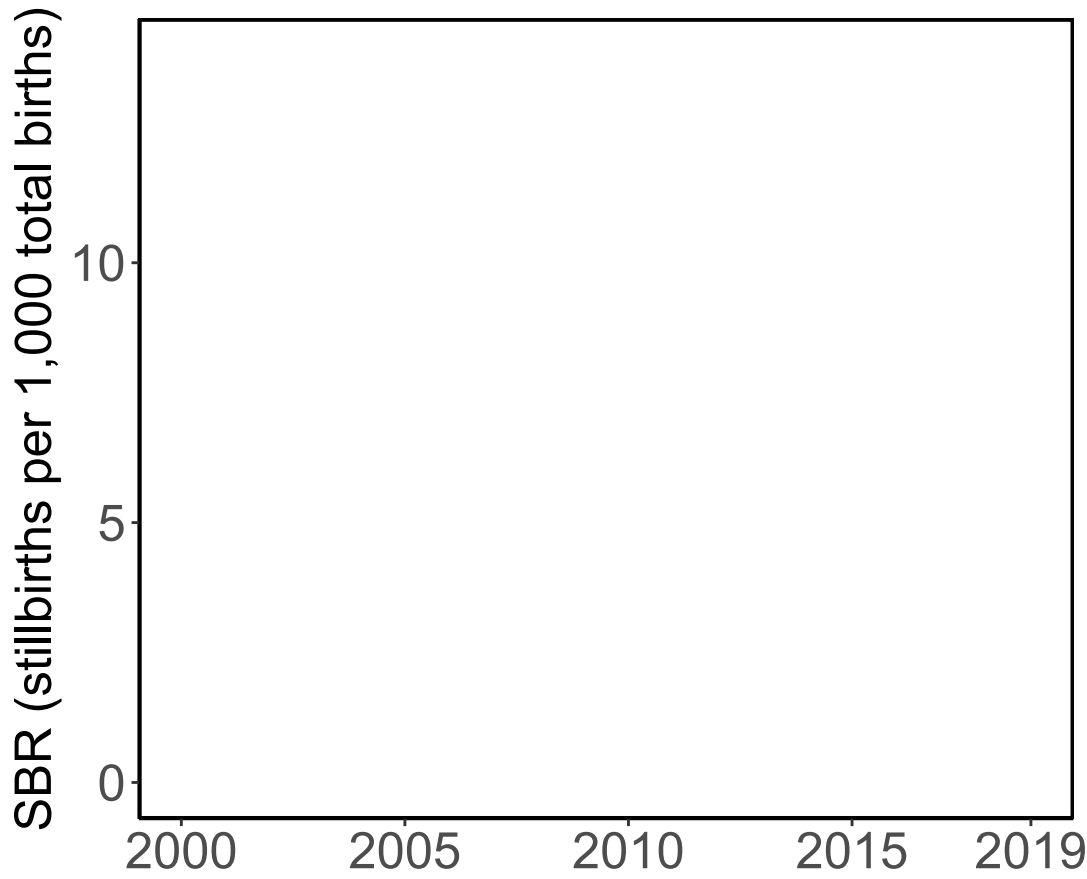

### '28+ Weeks of Gestation' Data (Incl. Adjusted Data)

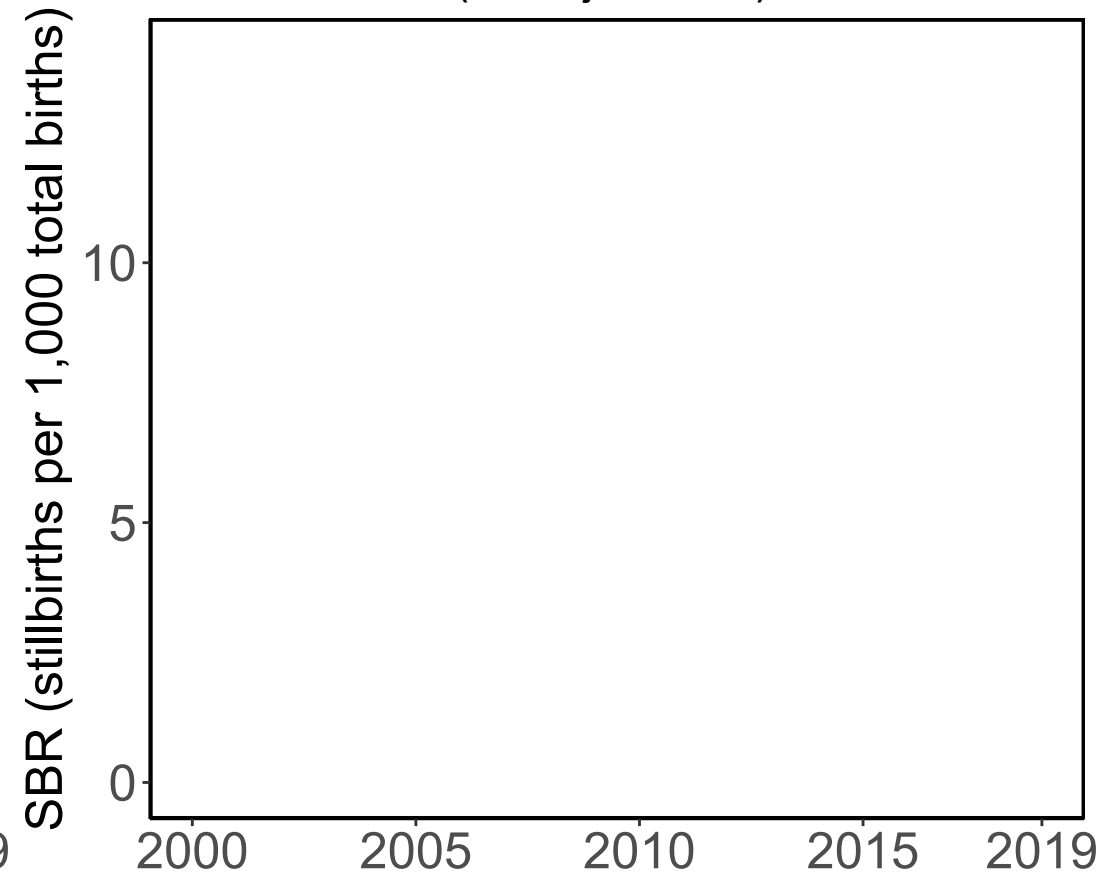

### Data Included in the Model

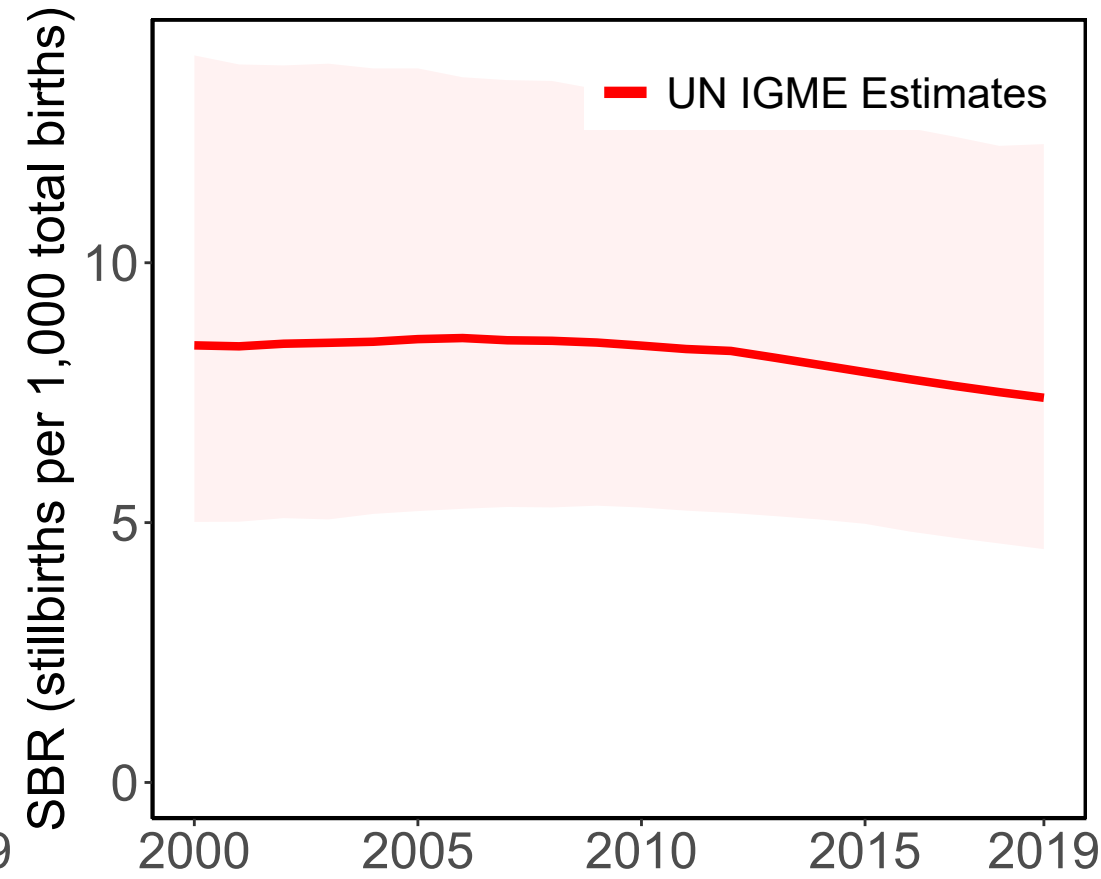

# Brunei Darussalam

Available Data

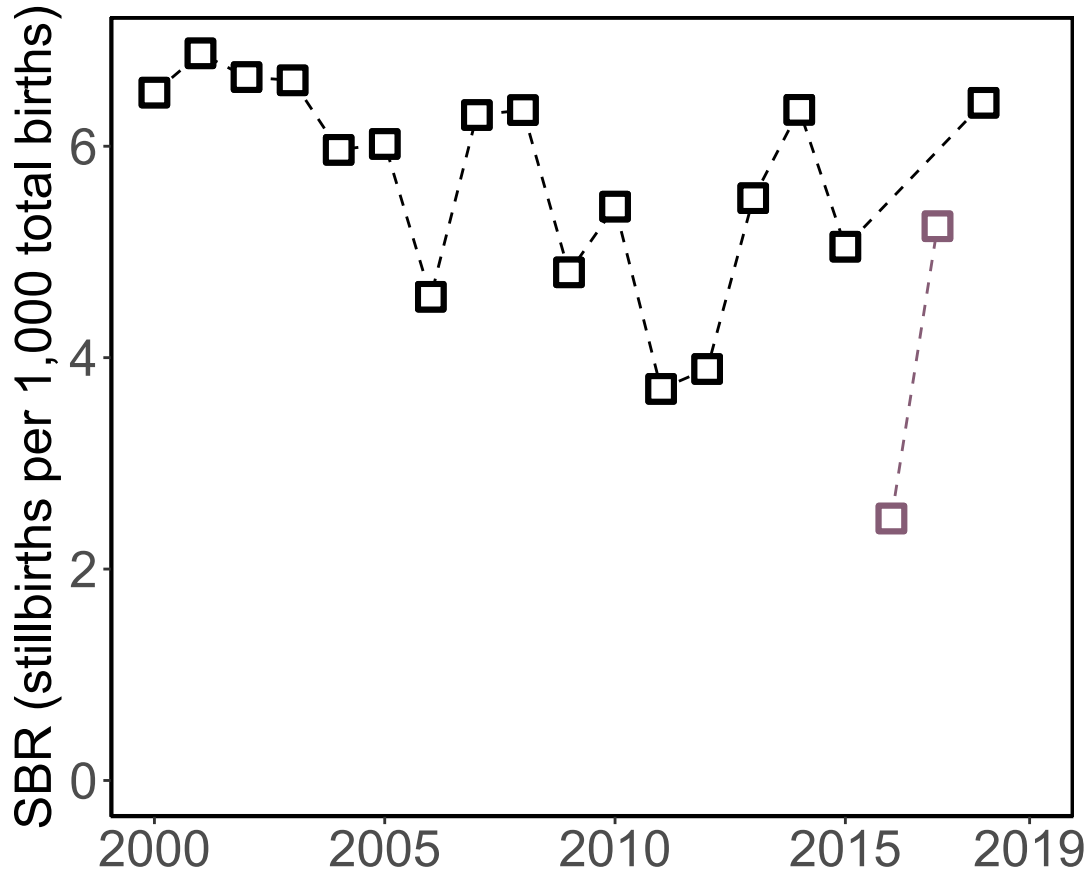

'28+ Weeks of Gestation' Data  
(Incl. Adjusted Data)

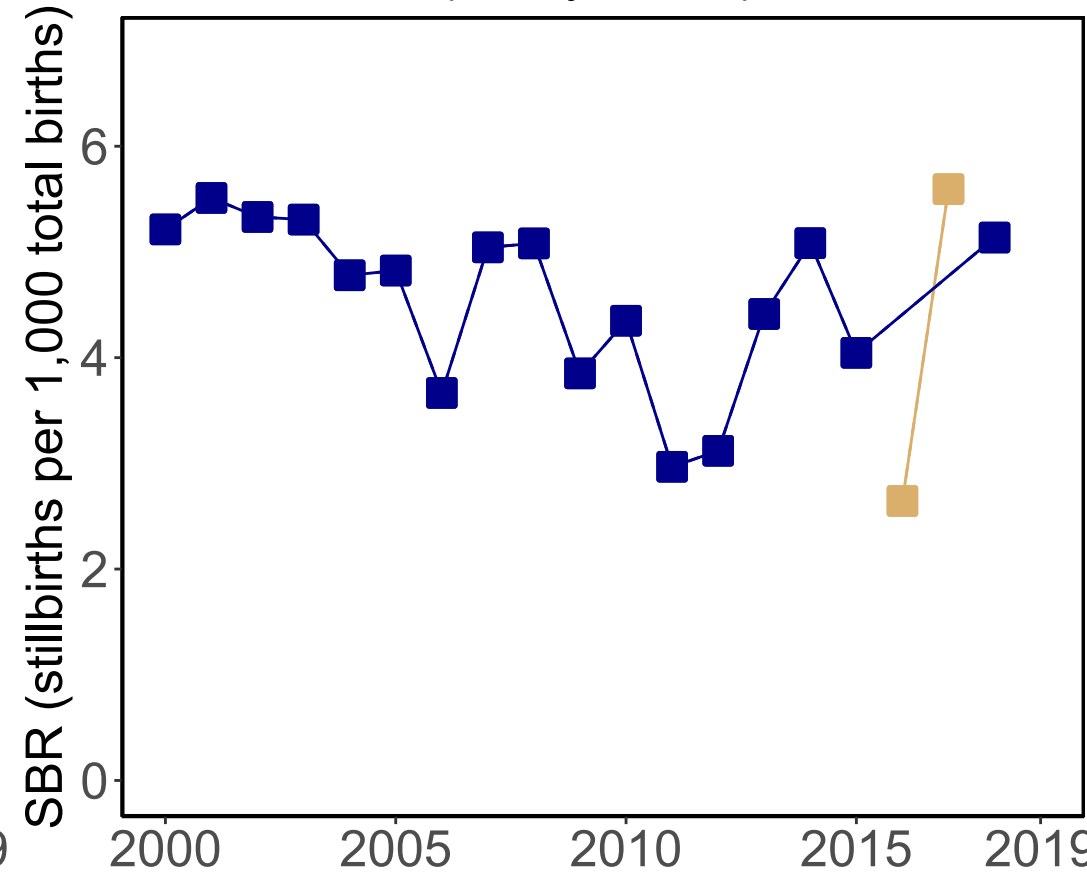

Data Included in the Model

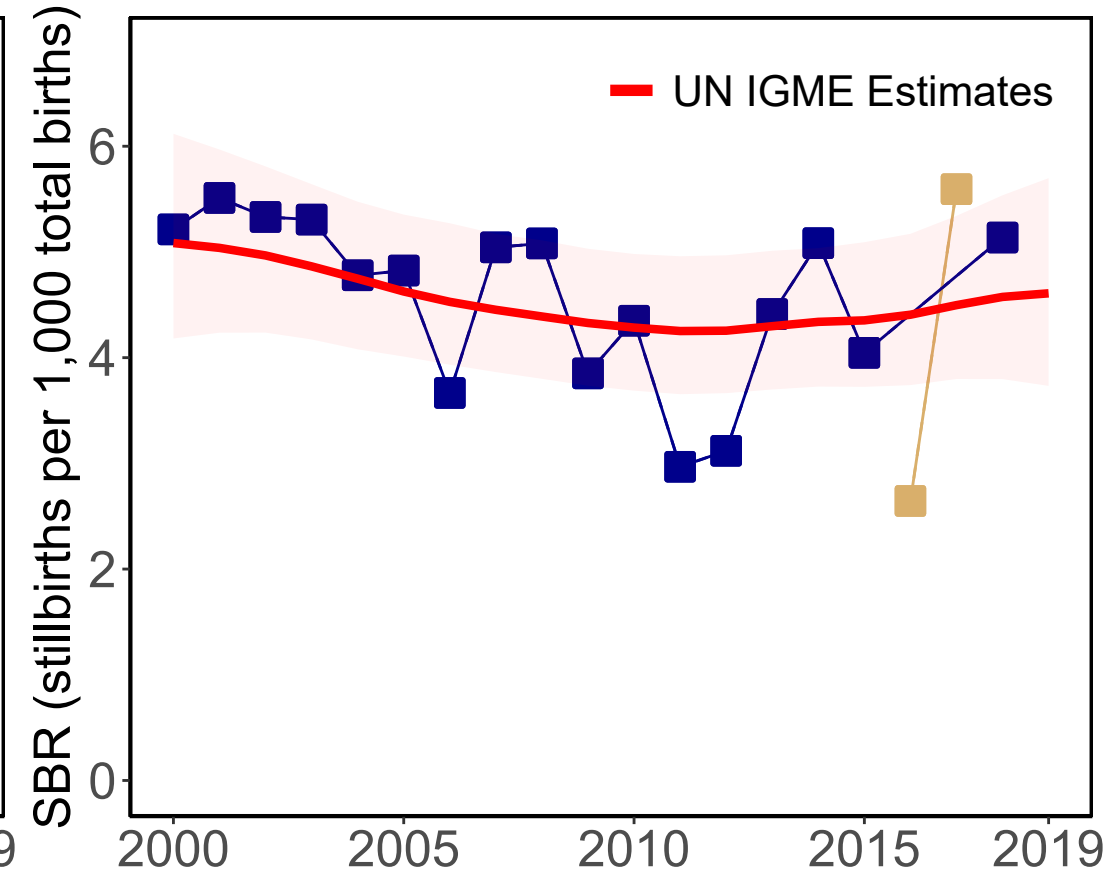

Source Types

Administrative

Data Sources

Birth or Death Registry (1000g)

Birth or Death Registry (28wks adj from 1000g)

Vital Registration (24wks)

Vital Registration (28wks adj from 24wks)

# Bhutan

### Available Data

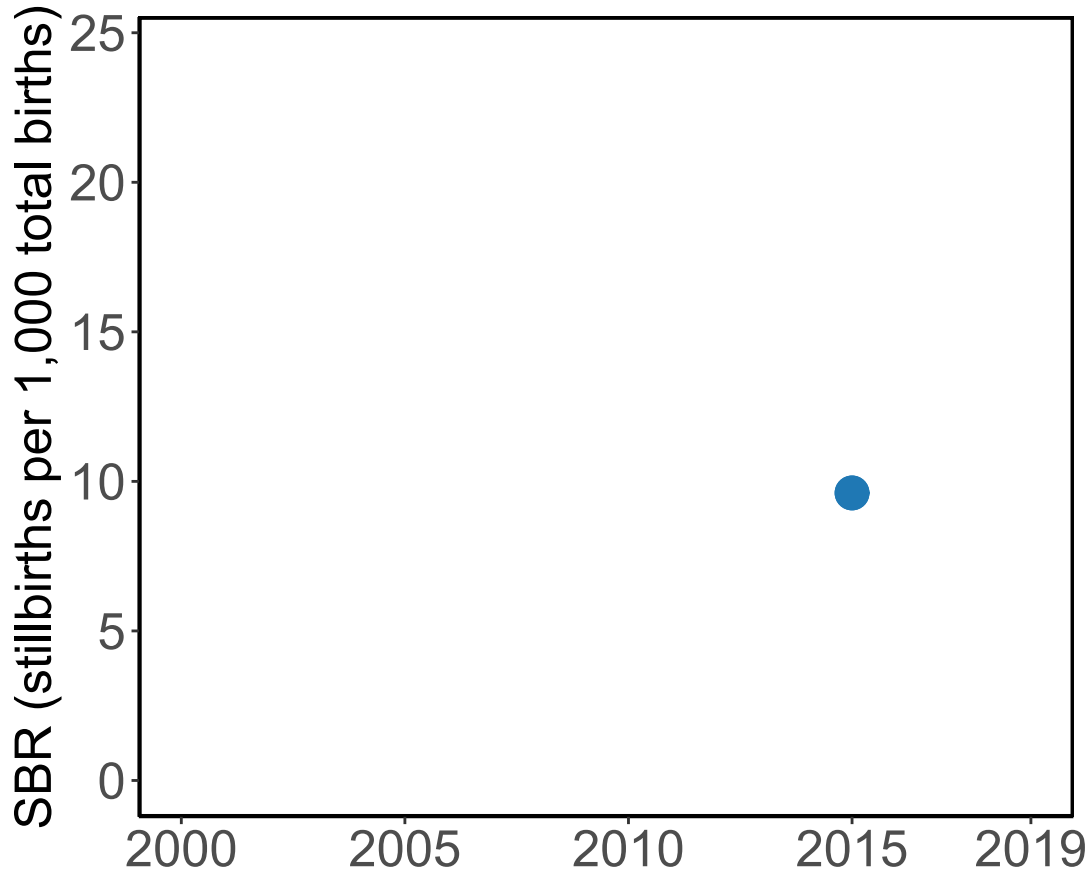

### '28+ Weeks of Gestation' Data (Incl. Adjusted Data)

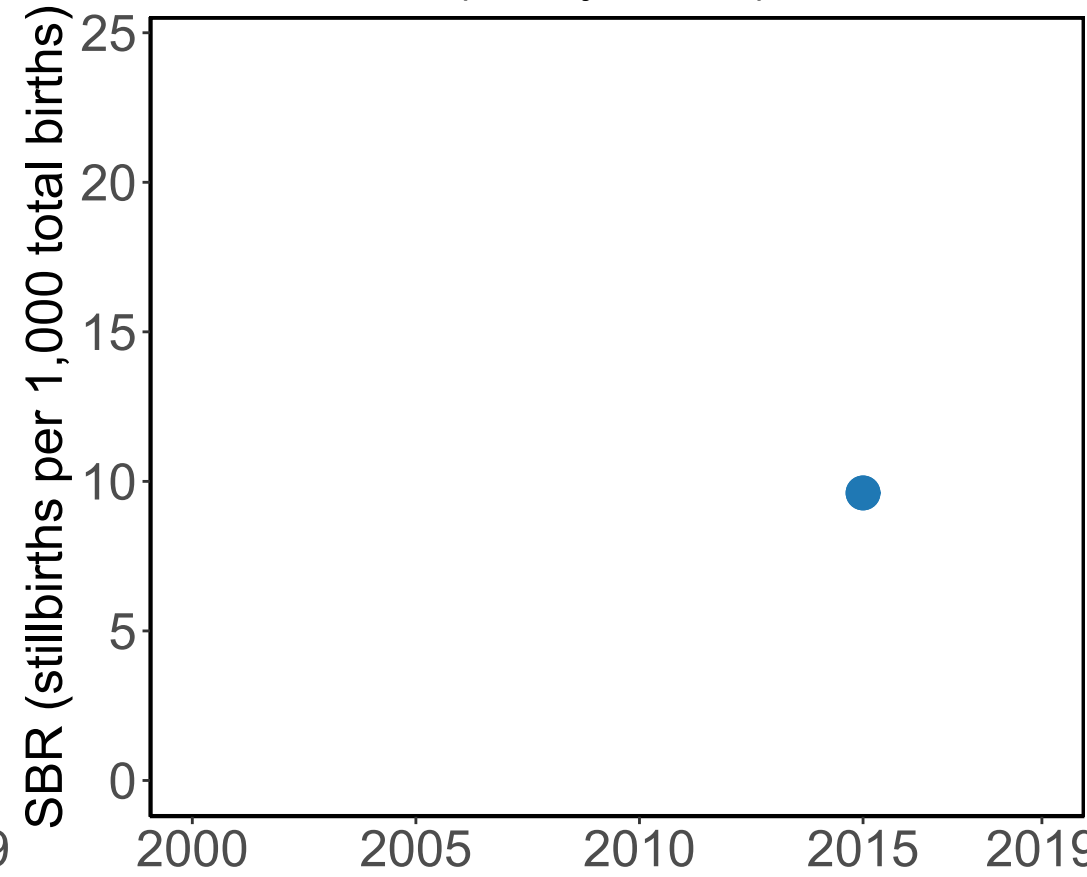

### Data Included in the Model

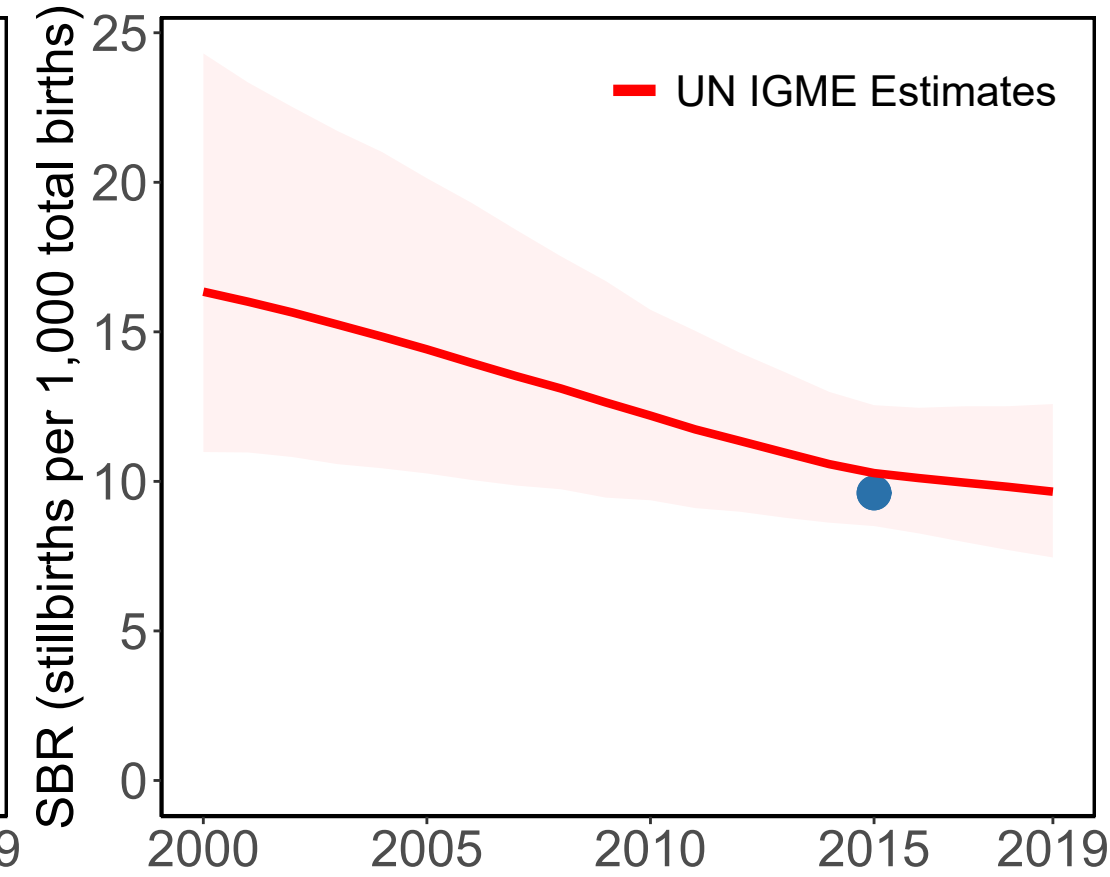

#### Source Types

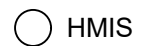

HMIS

#### Data Sources

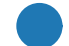

HMIS-DHIS2 (28wks)

# Botswana

### Available Data

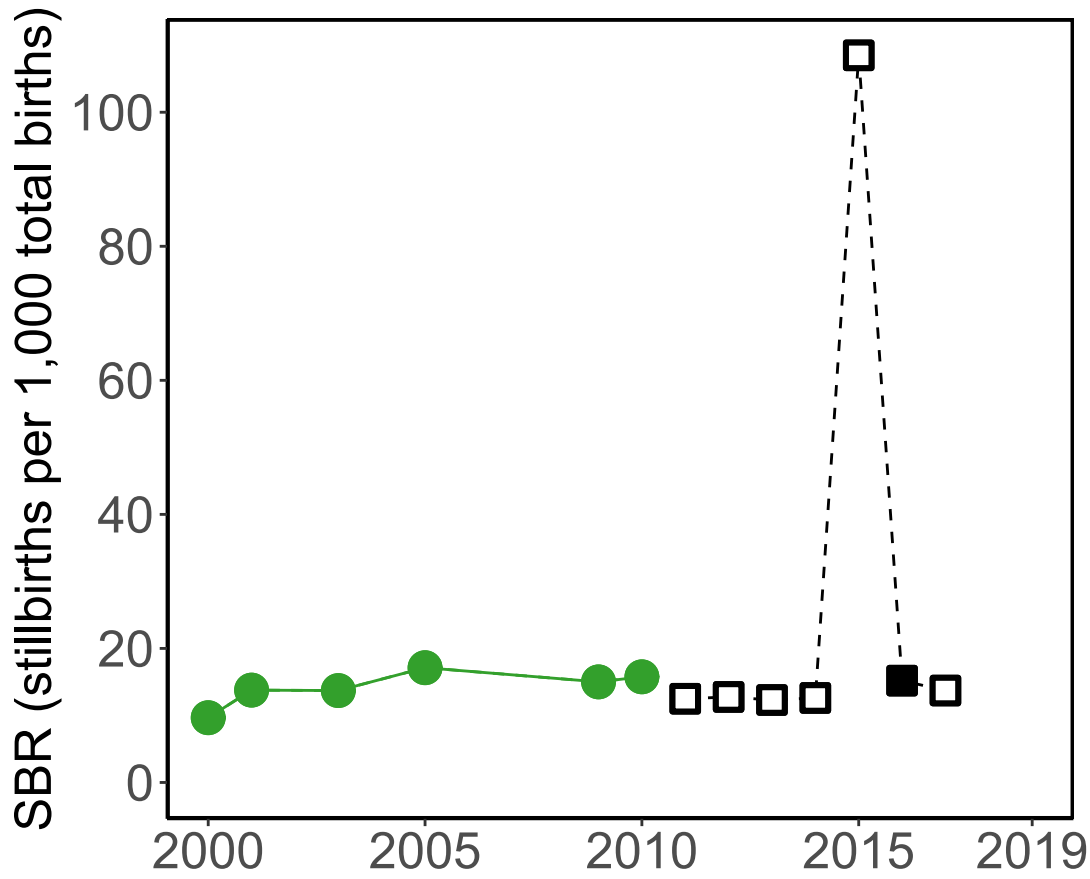

### '28+ Weeks of Gestation' Data (Incl. Adjusted Data)

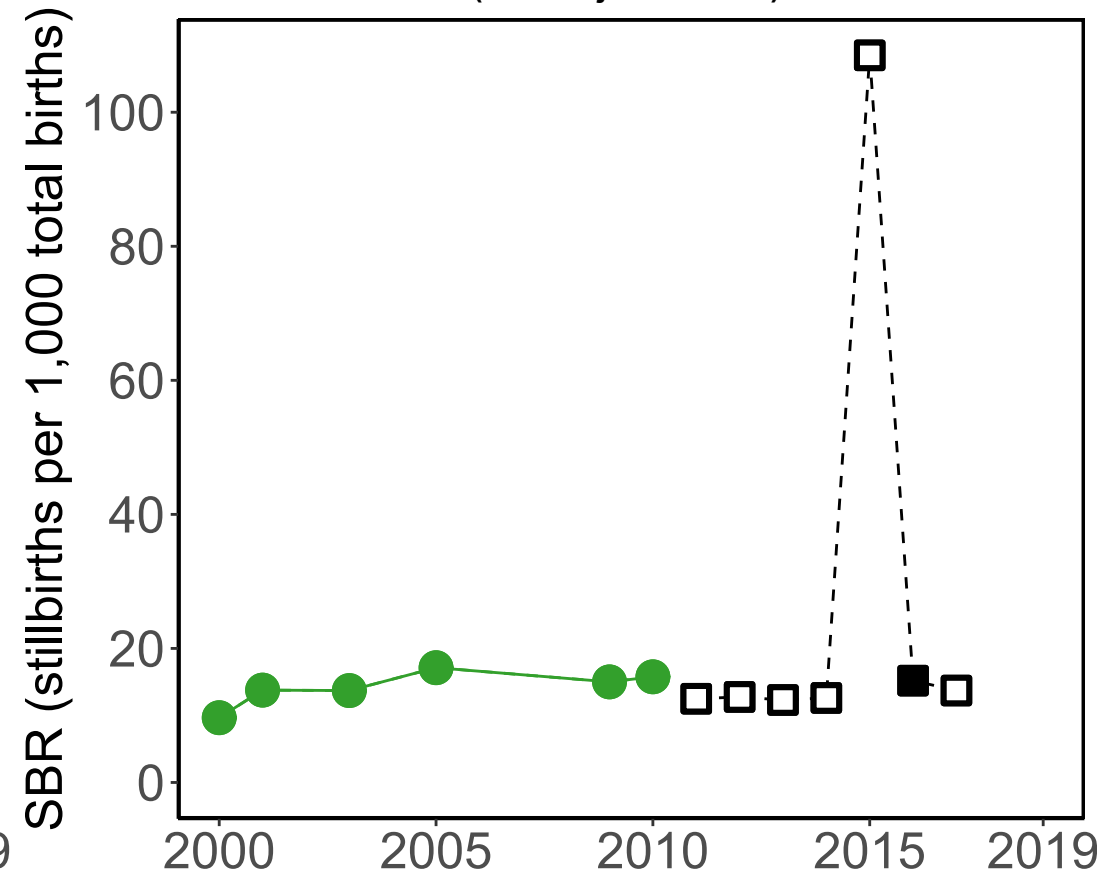

### Data Included in the Model

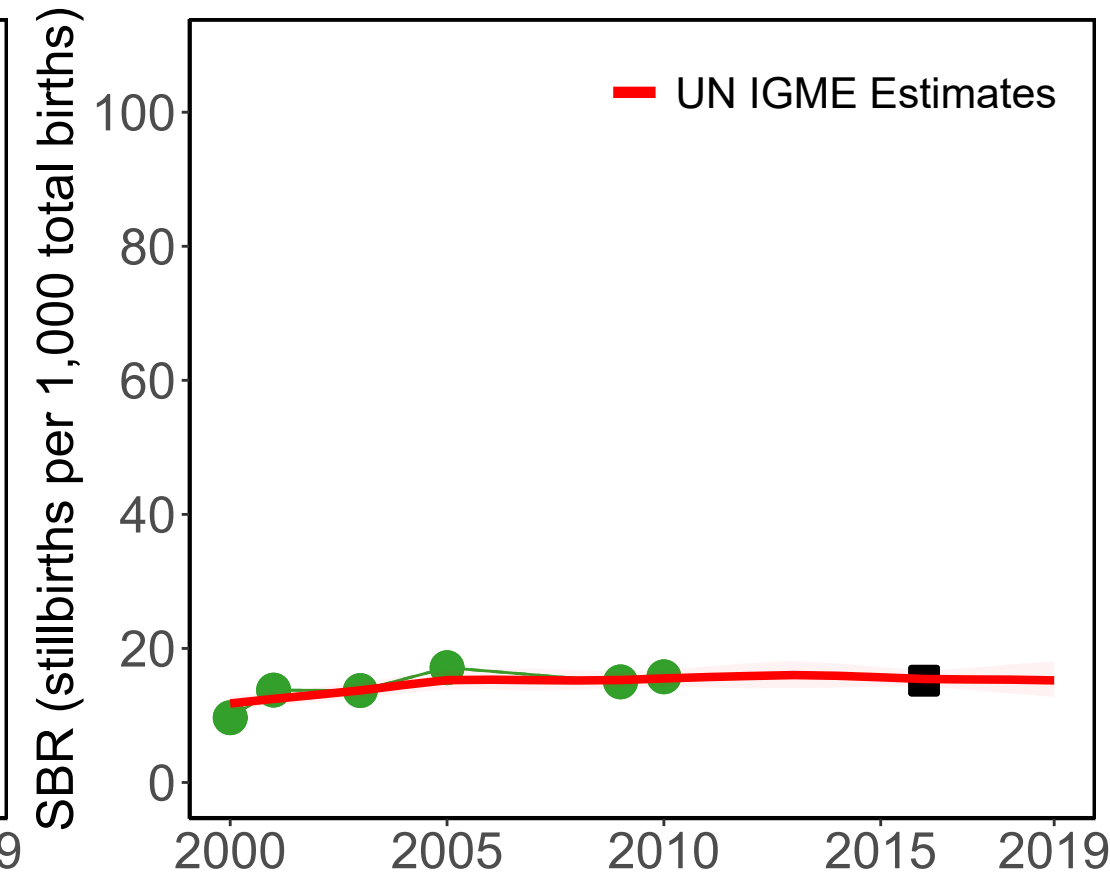

#### Source Types

Administrative ○ HMIS

#### Data Sources

■ Vital Registration (28wks) ● HMIS-DHIS2 (28wks)

# Central African Republic

Available Data

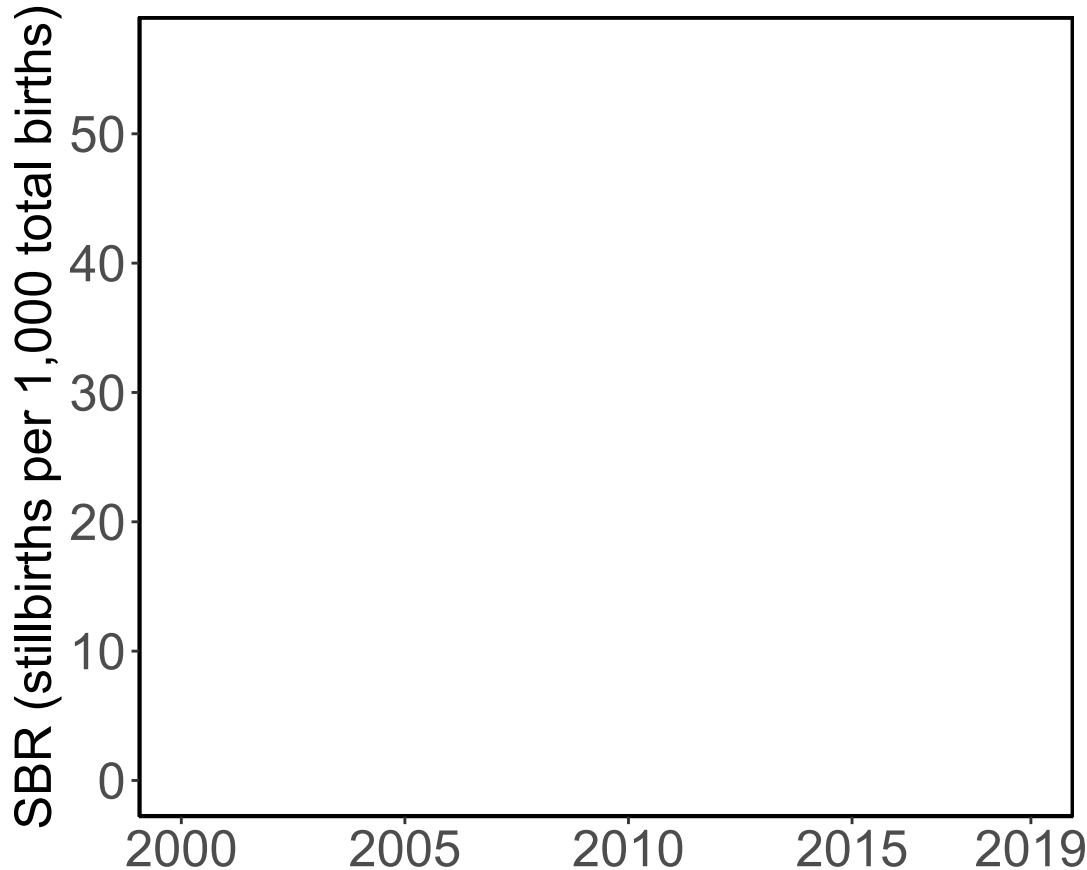

'28+ Weeks of Gestation' Data  
(Incl. Adjusted Data)

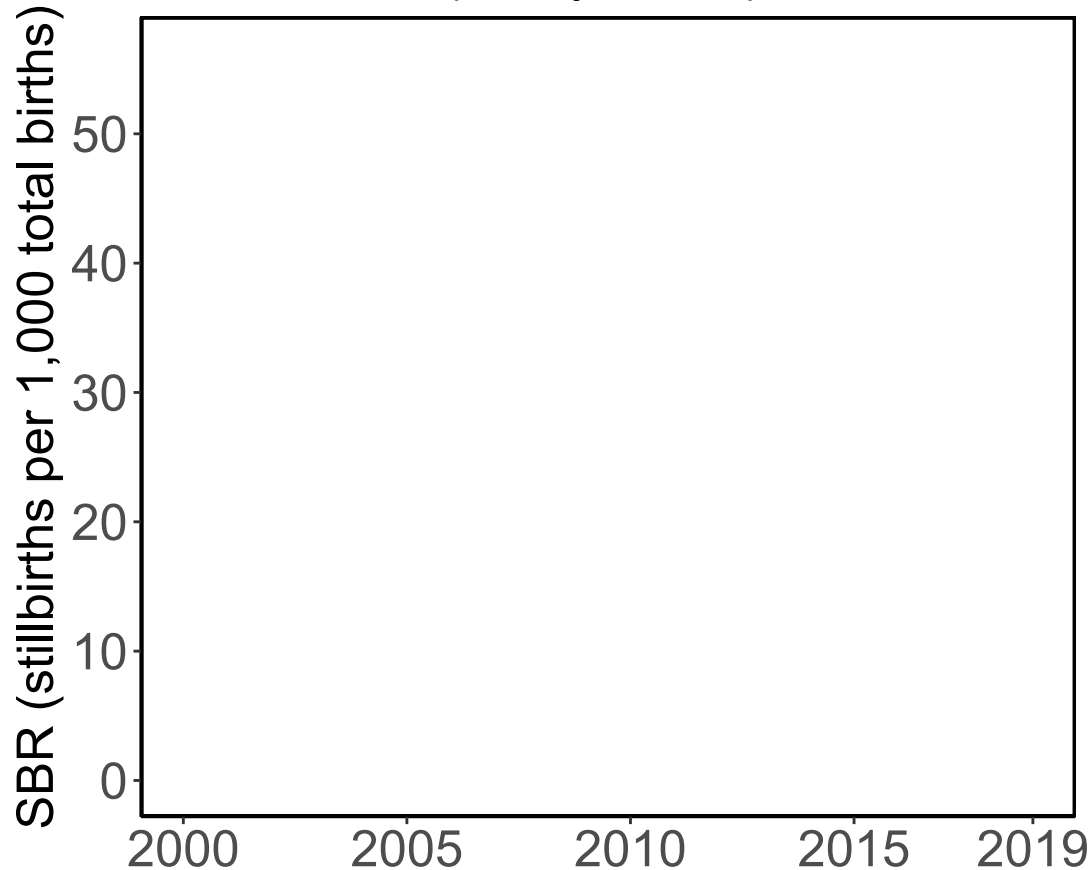

Data Included in the Model

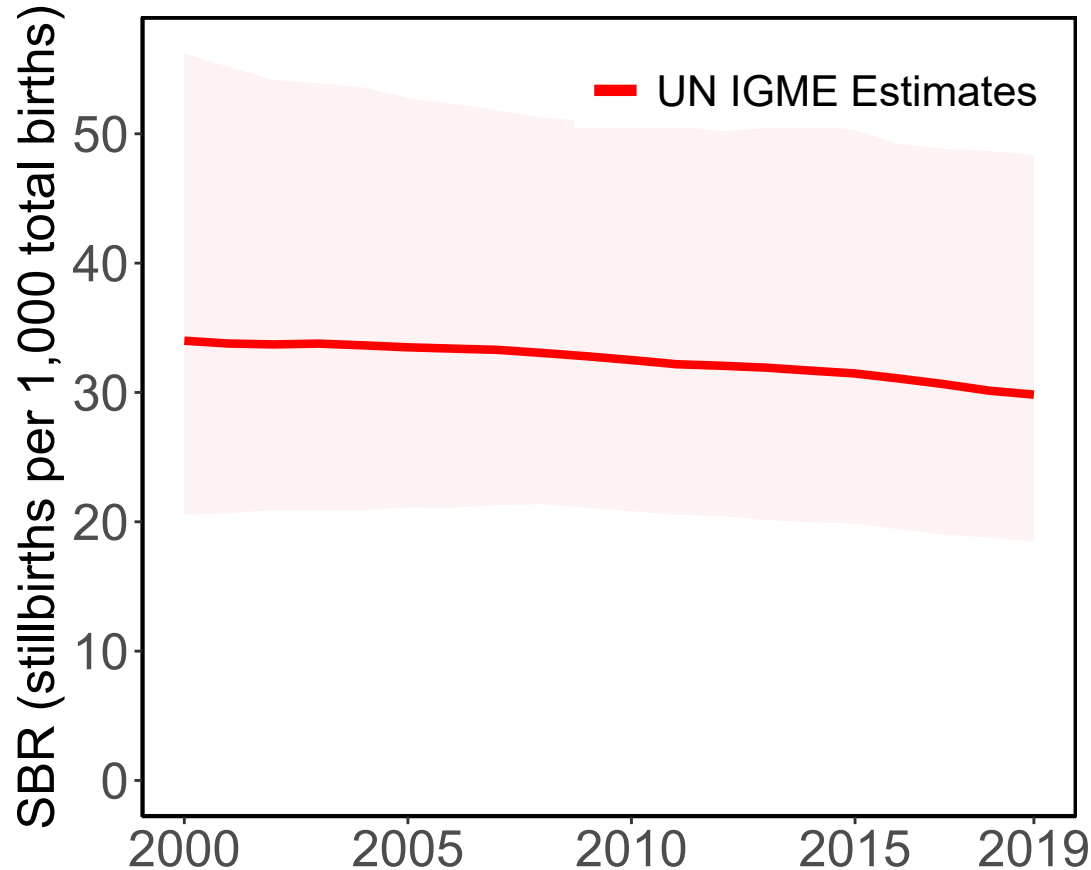



# Canada

### Available Data

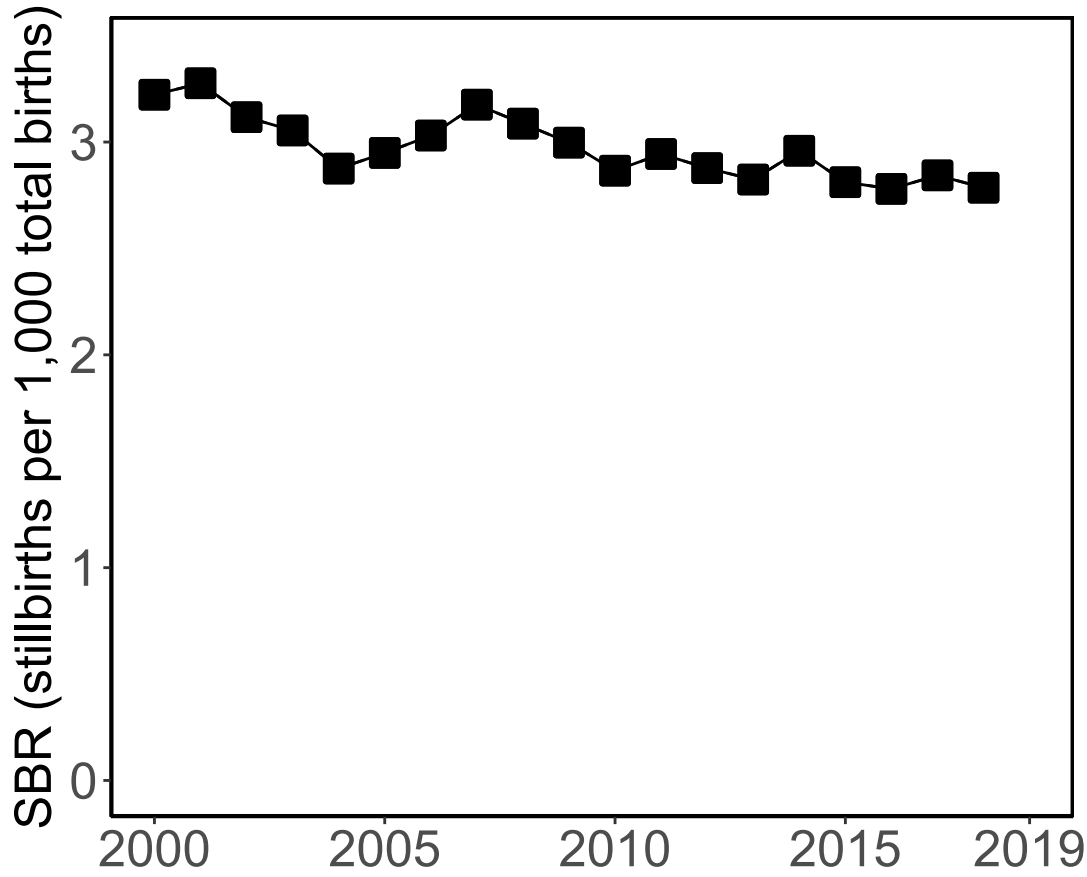

### '28+ Weeks of Gestation' Data (Incl. Adjusted Data)

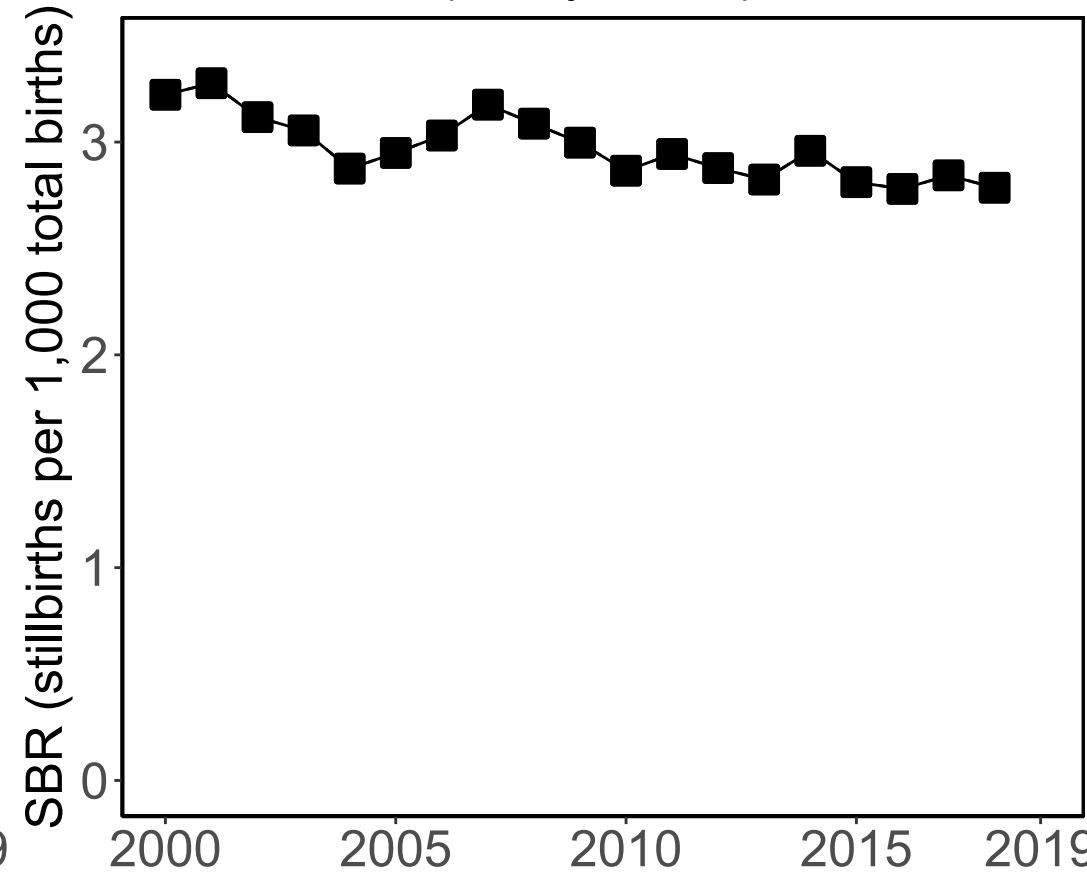

### Data Included in the Model

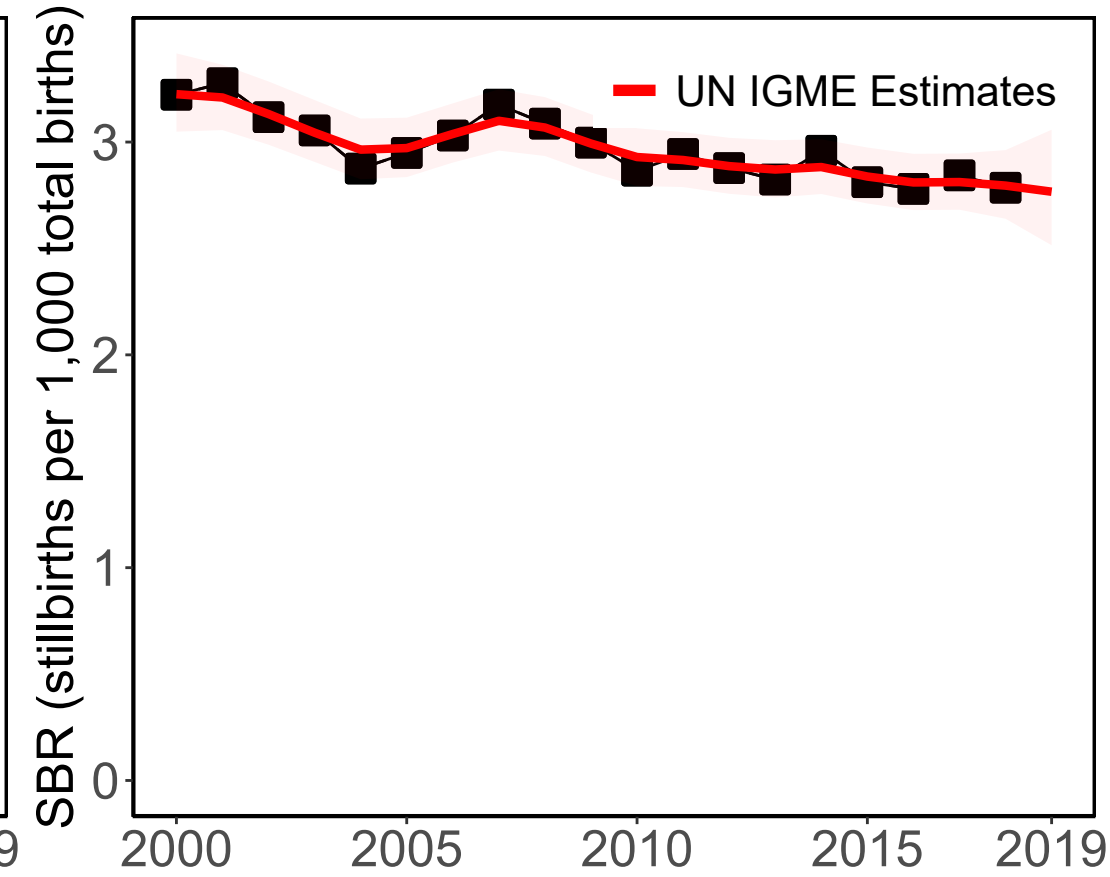

#### Source Types

□ Administrative

#### Data Sources

■ Vital Registration (28wks)

# Switzerland

### Available Data

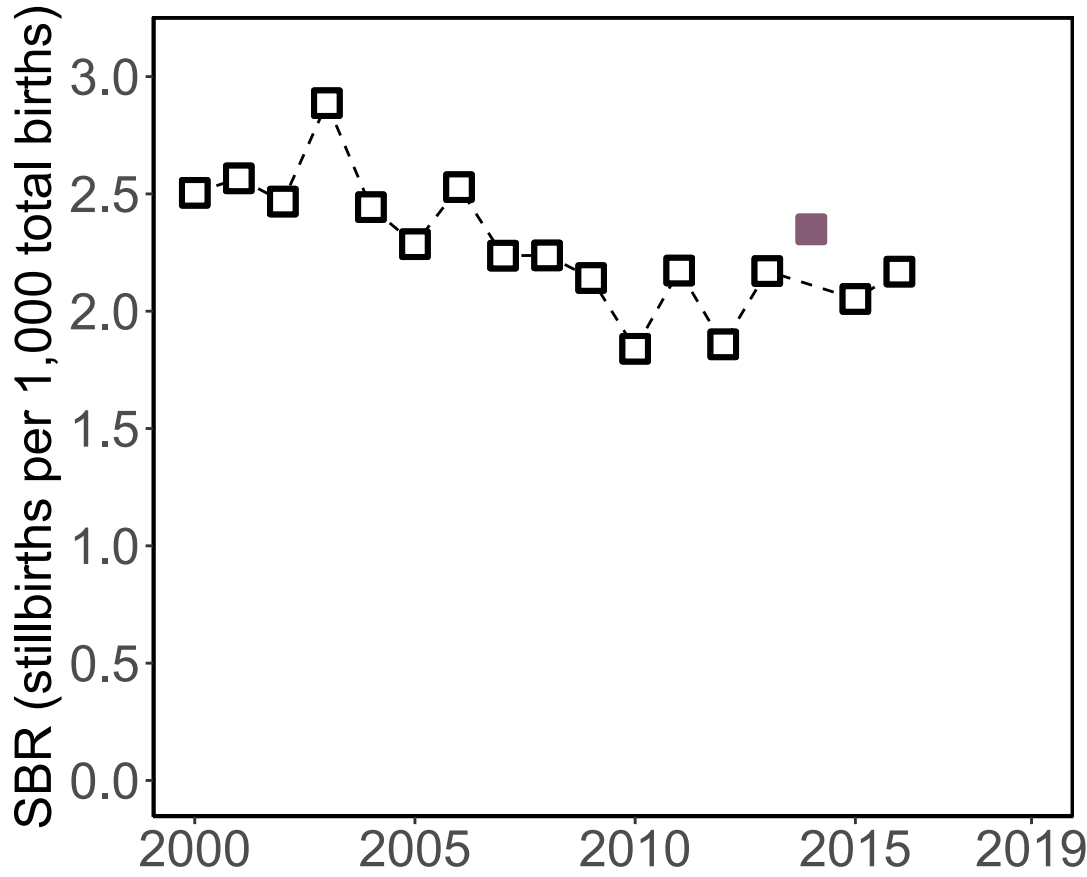

### '28+ Weeks of Gestation' Data (Incl. Adjusted Data)

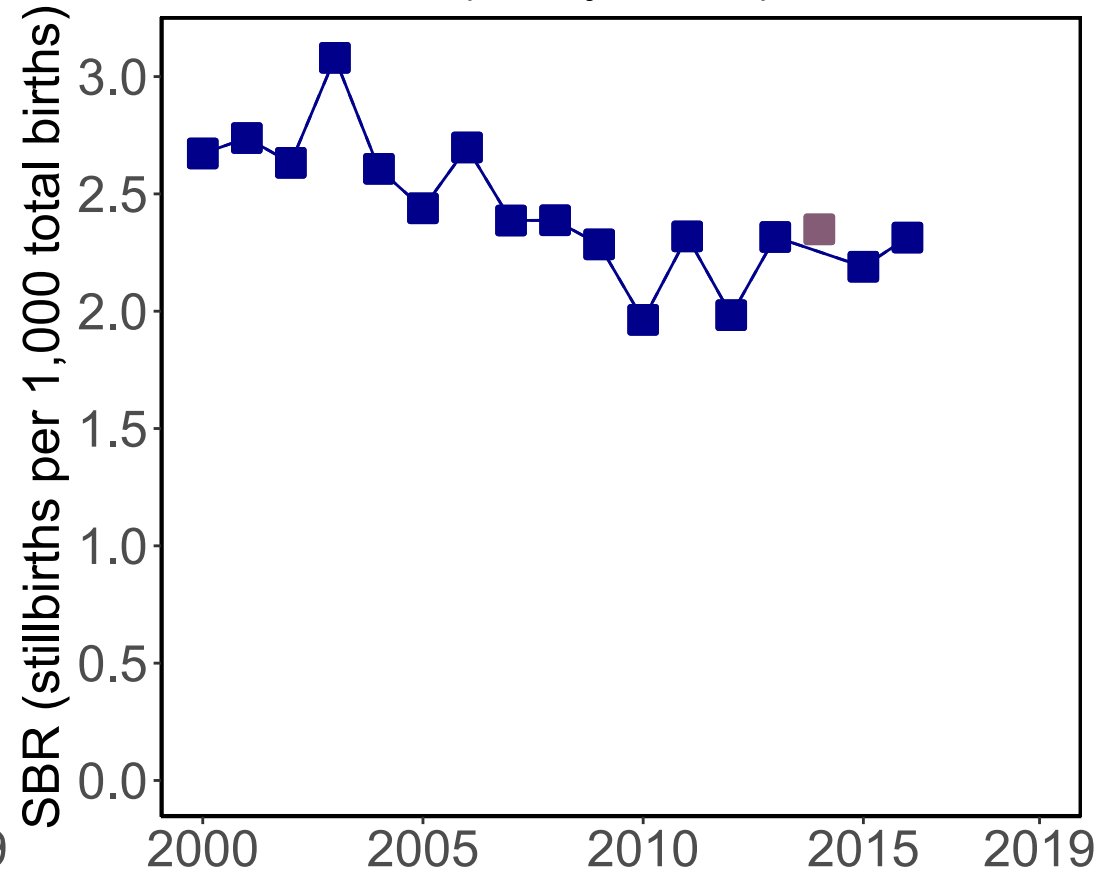

### Data Included in the Model

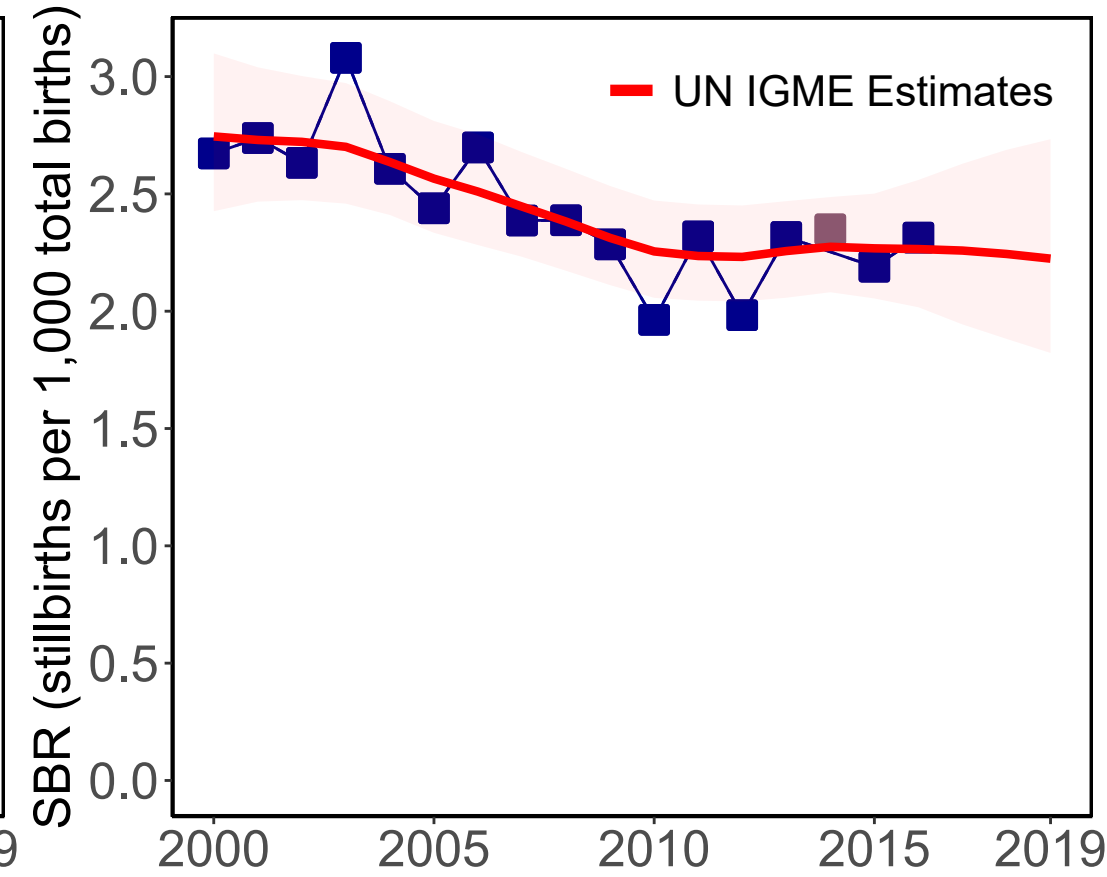

### Source Types

Administrative

### Data Sources

Vital Registration (28wks)

Vital Registration (1000g)

Vital Registration (28wks adj from 1000g)

# Chile

### Available Data

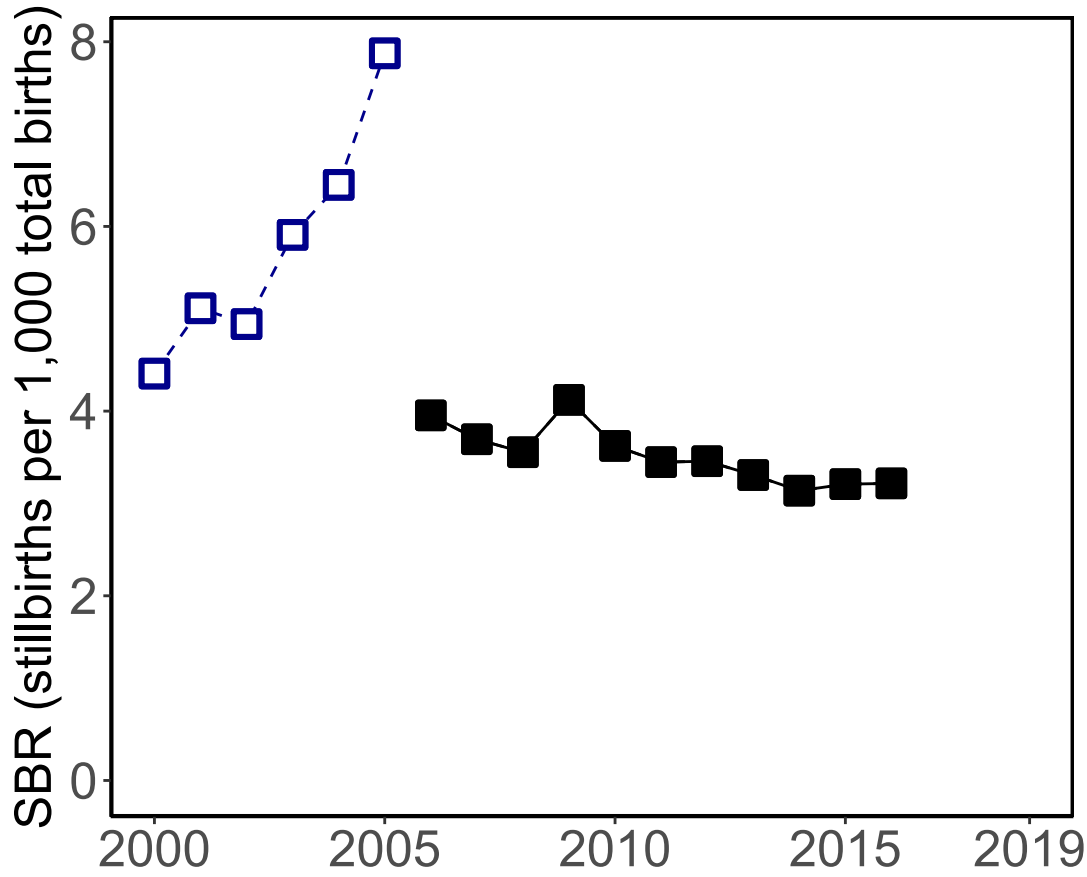

### '28+ Weeks of Gestation' Data (Incl. Adjusted Data)

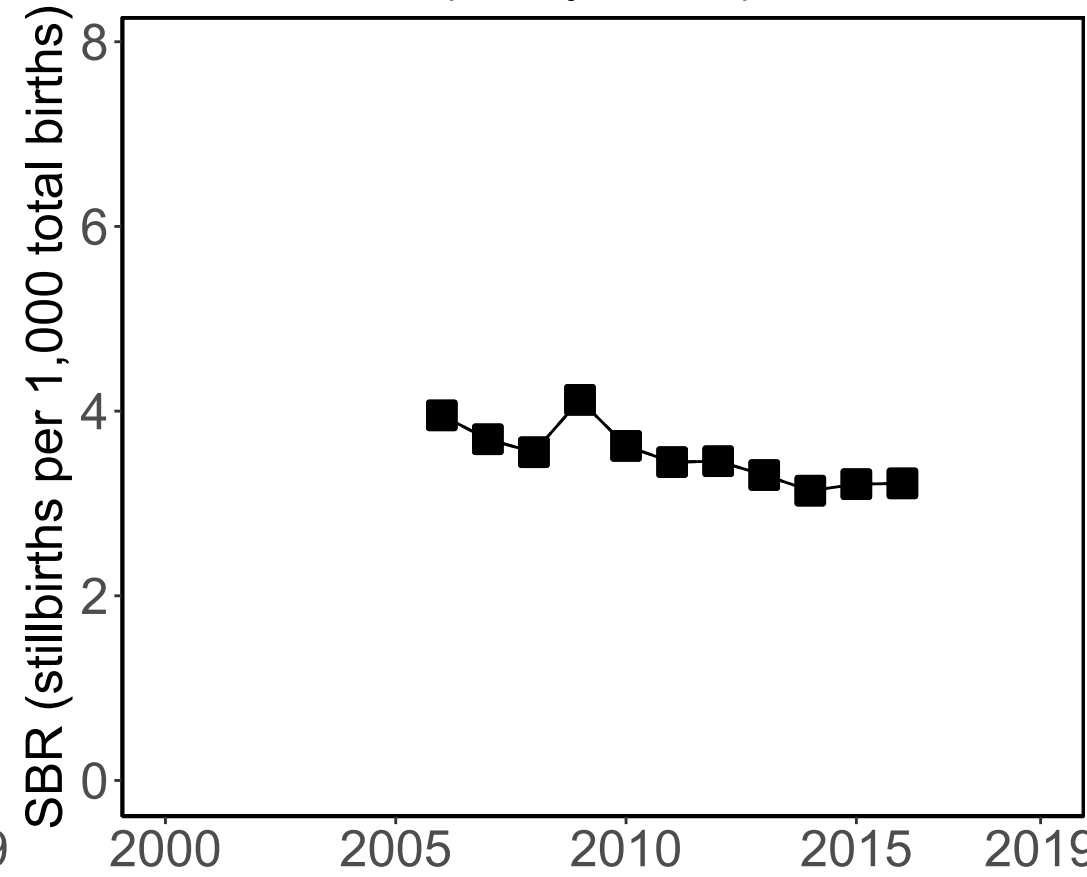

### Data Included in the Model

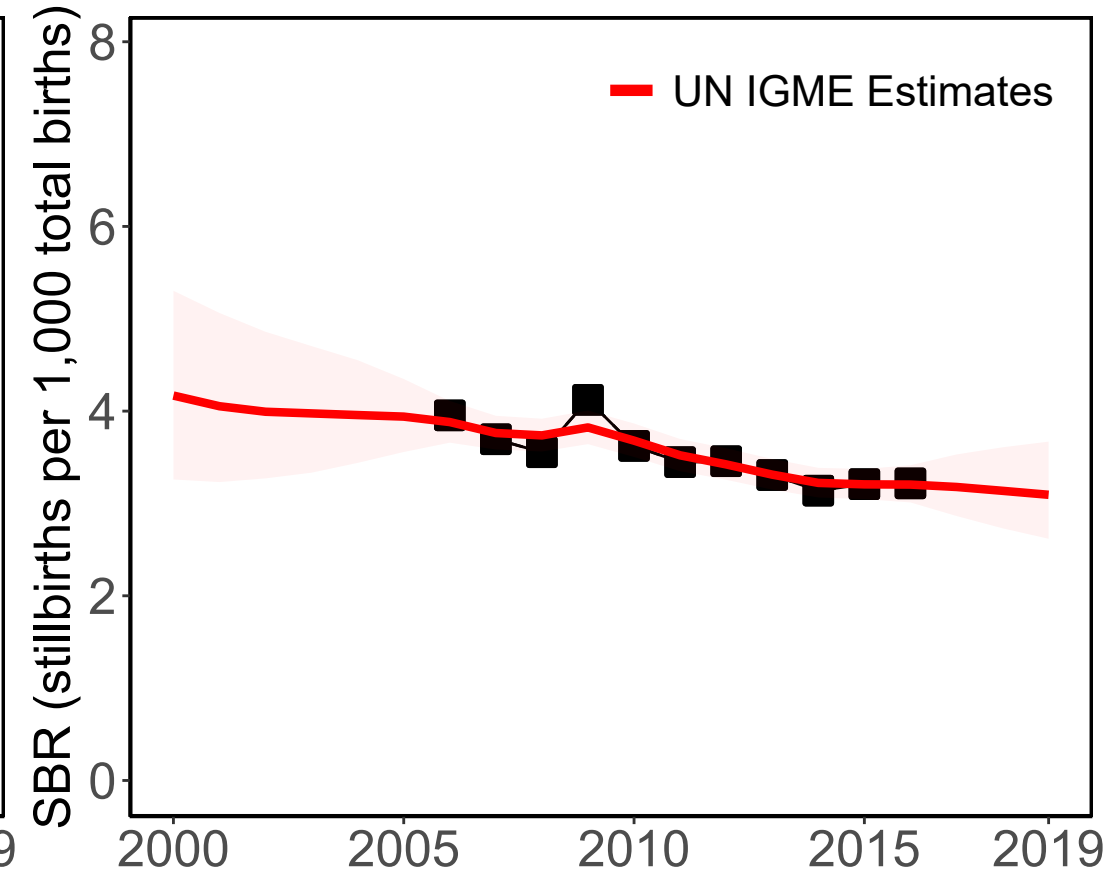

#### Source Types

□ Administrative

#### Data Sources

■ Vital Registration (28wks)

□ Vital Registration (any gestational age or birthweight)

# China

Available Data

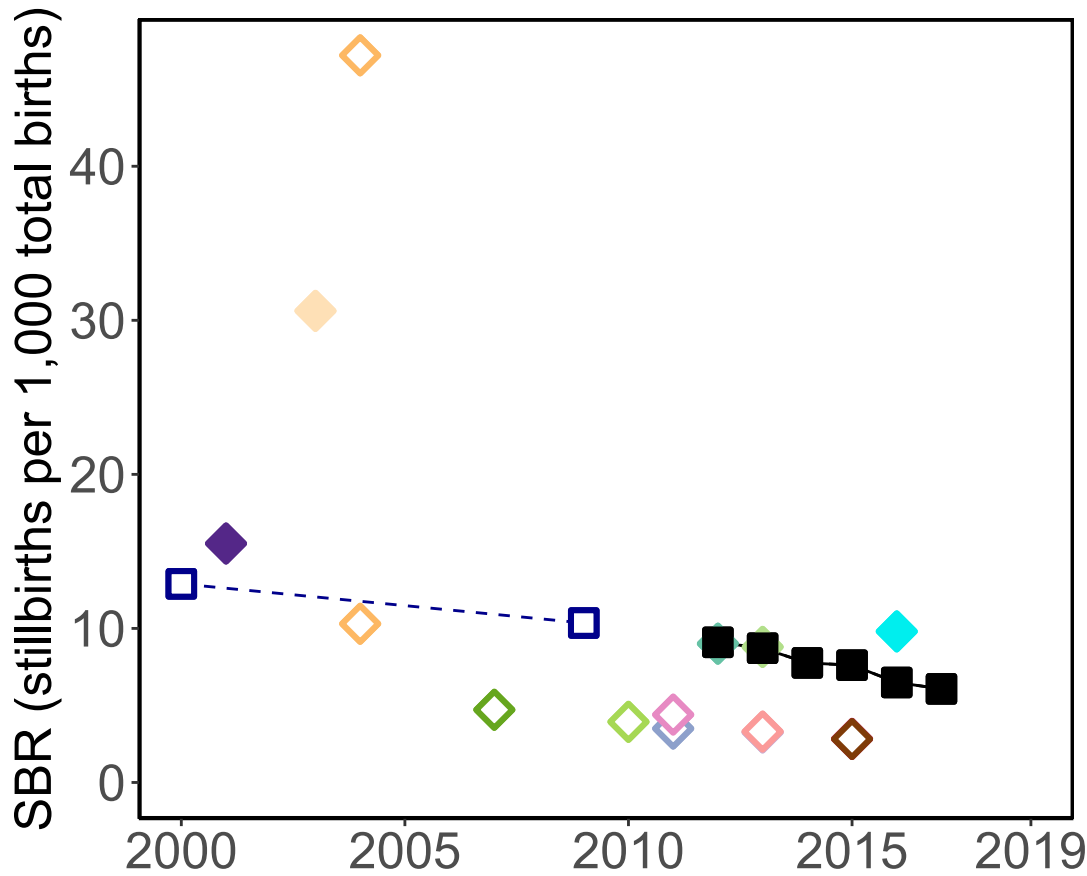

'28+ Weeks of Gestation' Data  
(Incl. Adjusted Data)

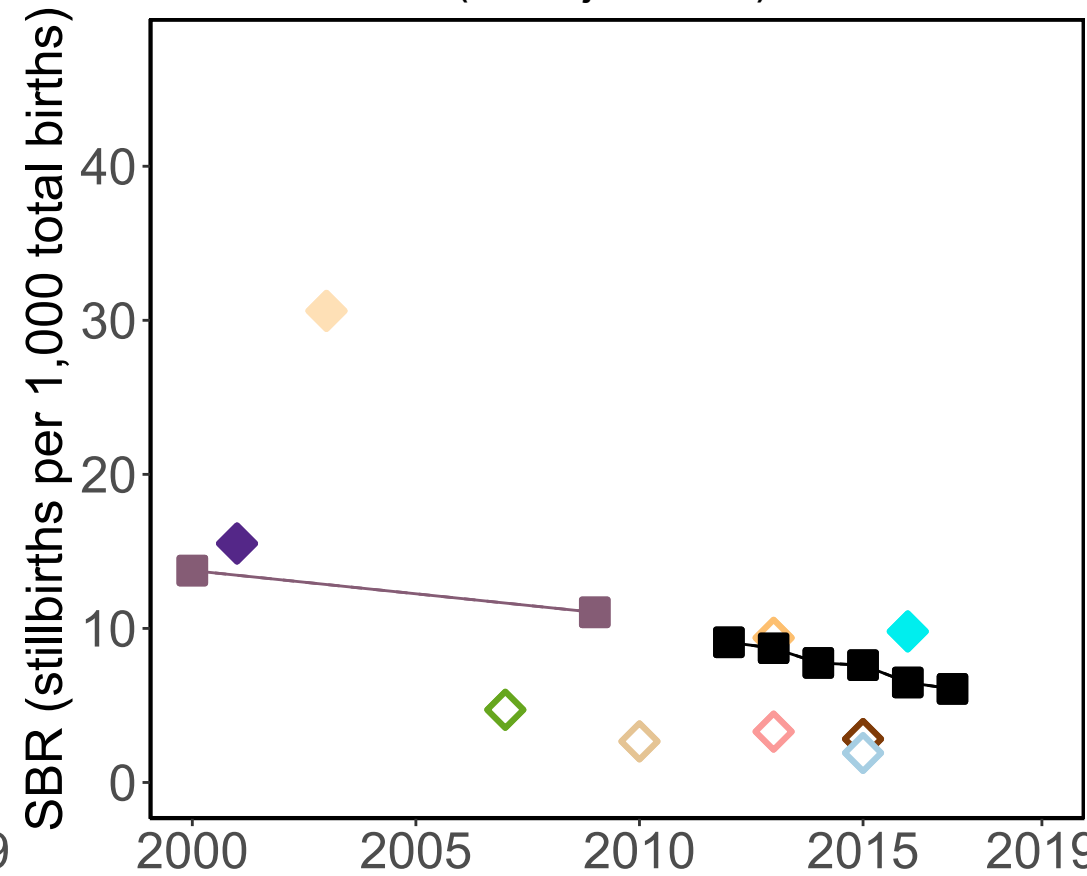

Data Included in the Model

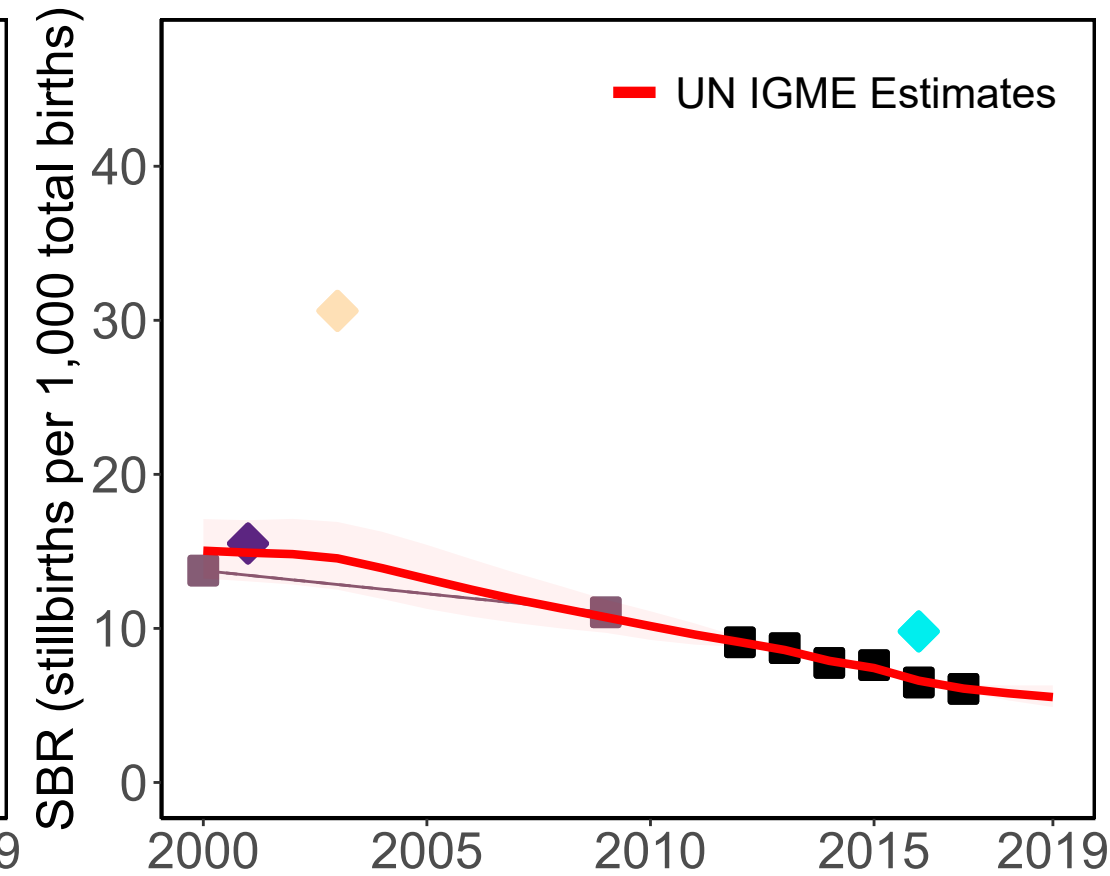

**Data Sources**

- Vital Registration (28wks)
- Vital Registration (1000g)
- Vital Registration (28wks adj from 1000g)
- Zang 2019 (28wks)
- Wang 2018 (22wks)
- Wang 2018 (28wks adj from 22wks)
- Wang 2018 (28wks)
- Ge 2016 (not defined)
- Zhong (28wks)
- Zhu 2016 (1000g)
- Zhu 2016 (28wks adj from 1000g)
- Yang 2018 (20wks)
- Qu 2019 (20wks)
- Wang 2016 (not defined)
- Sun 2013 (22wks)
- Sun 2013 (28wks adj from 22wks)
- Liu 2013 (28wks)
- Xu 2012 (20wks)
- Zeng 2008 (28wks)
- Zheng 2015 (28wks)

**Source Types**

- Administrative
- Population study

# Cote d'Ivoire

## Available Data

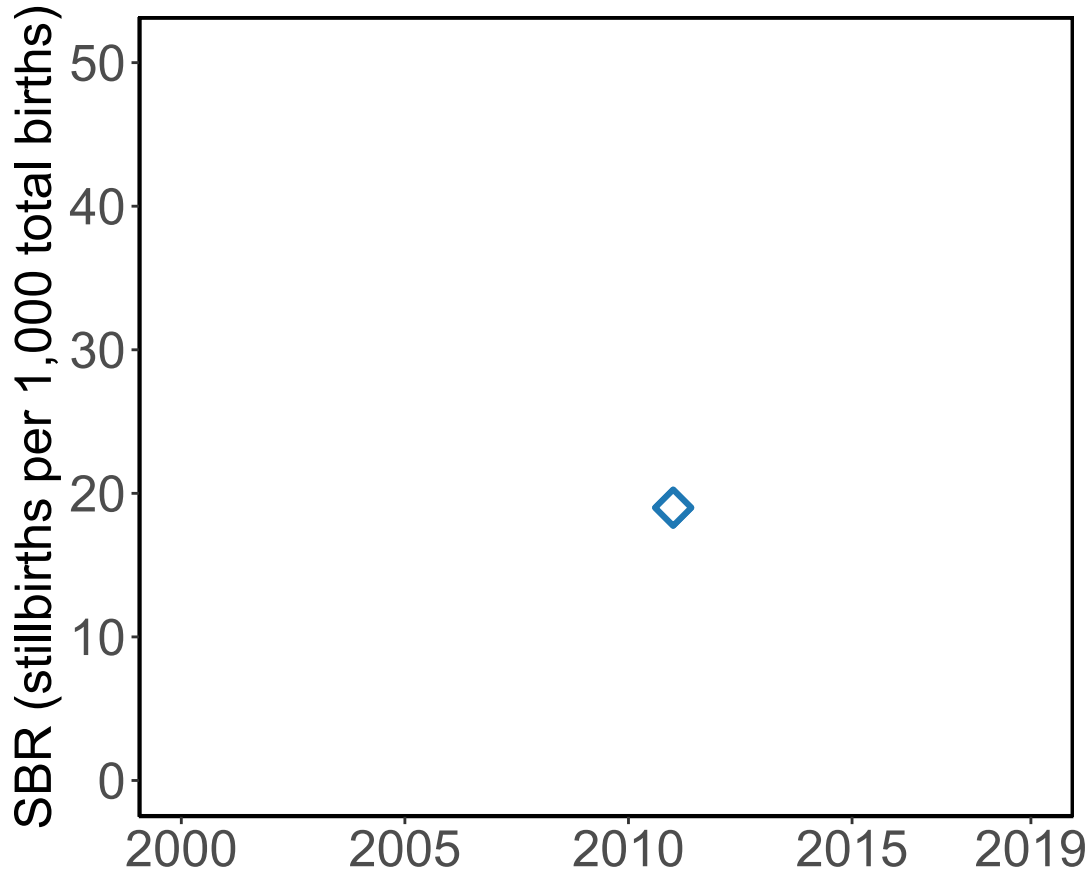

## '28+ Weeks of Gestation' Data (Incl. Adjusted Data)

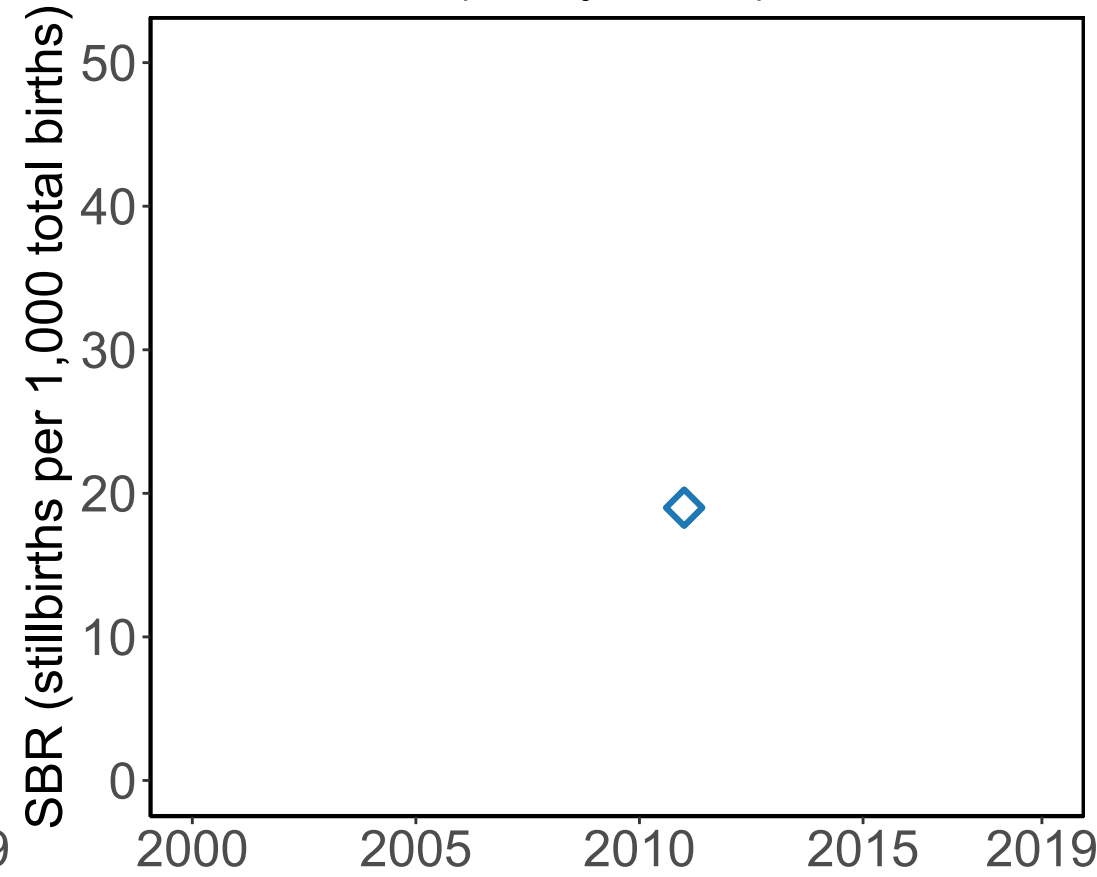

## Data Included in the Model

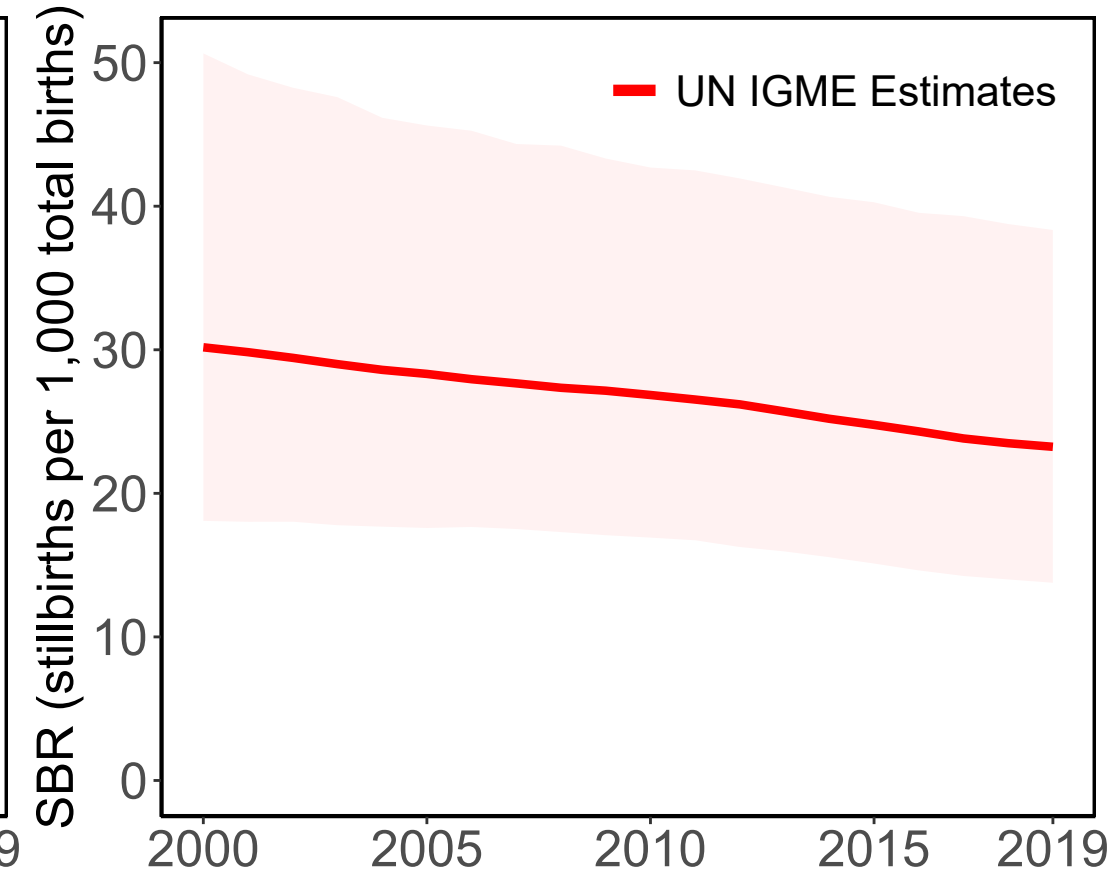

### Source Types

Population study

### Data Sources

Waiswa (28wks)

# Cameroon

### Available Data

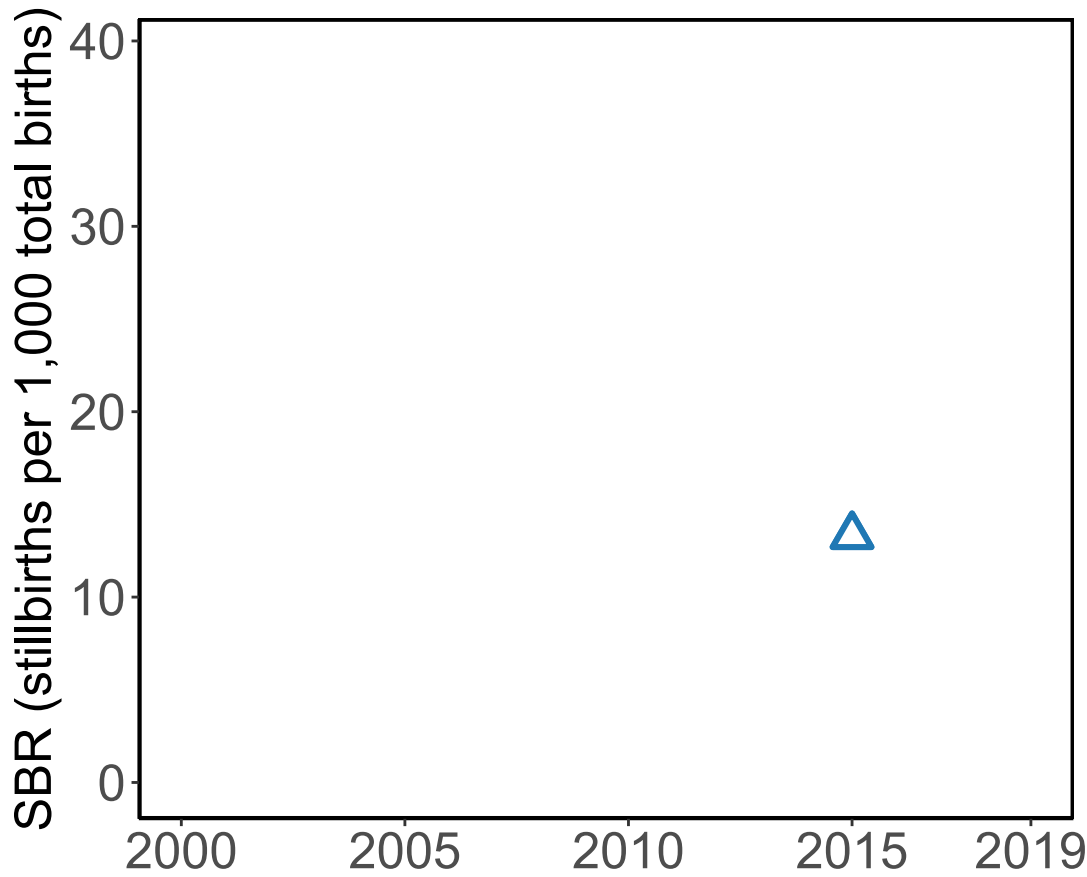

### '28+ Weeks of Gestation' Data (Incl. Adjusted Data)

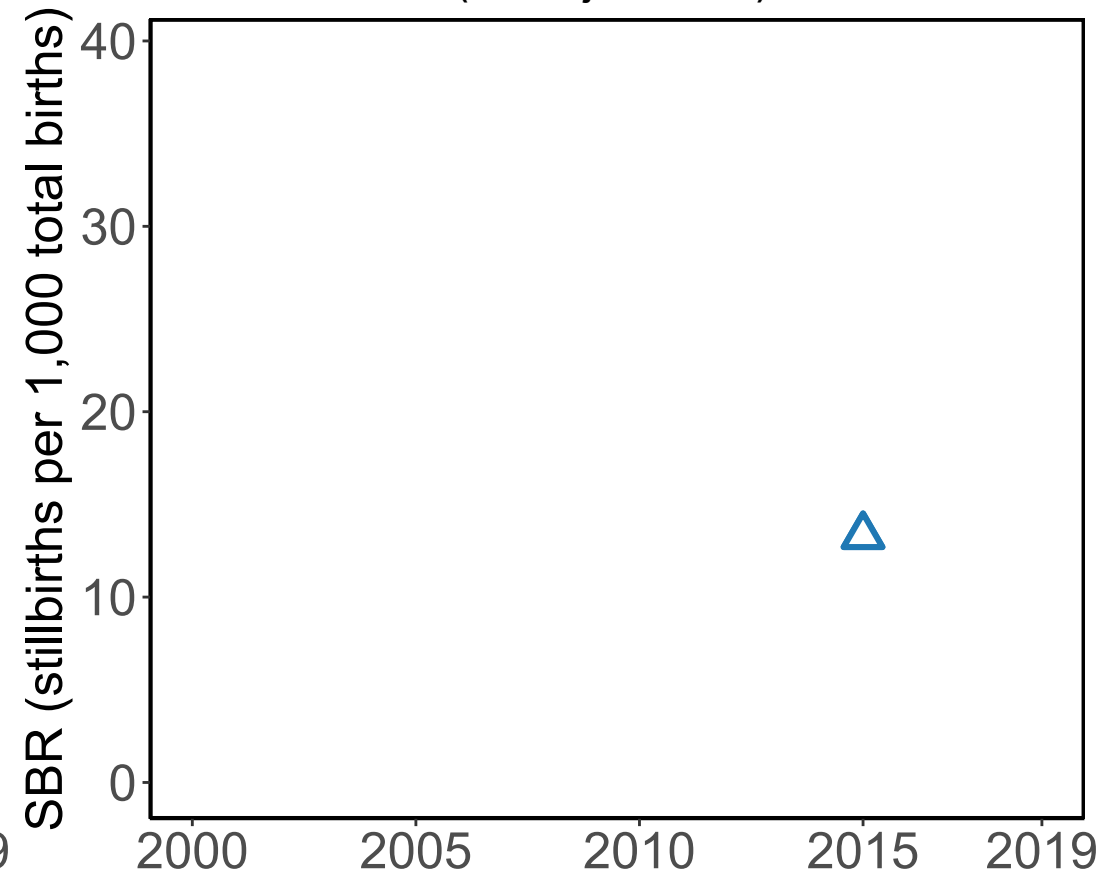

### Data Included in the Model

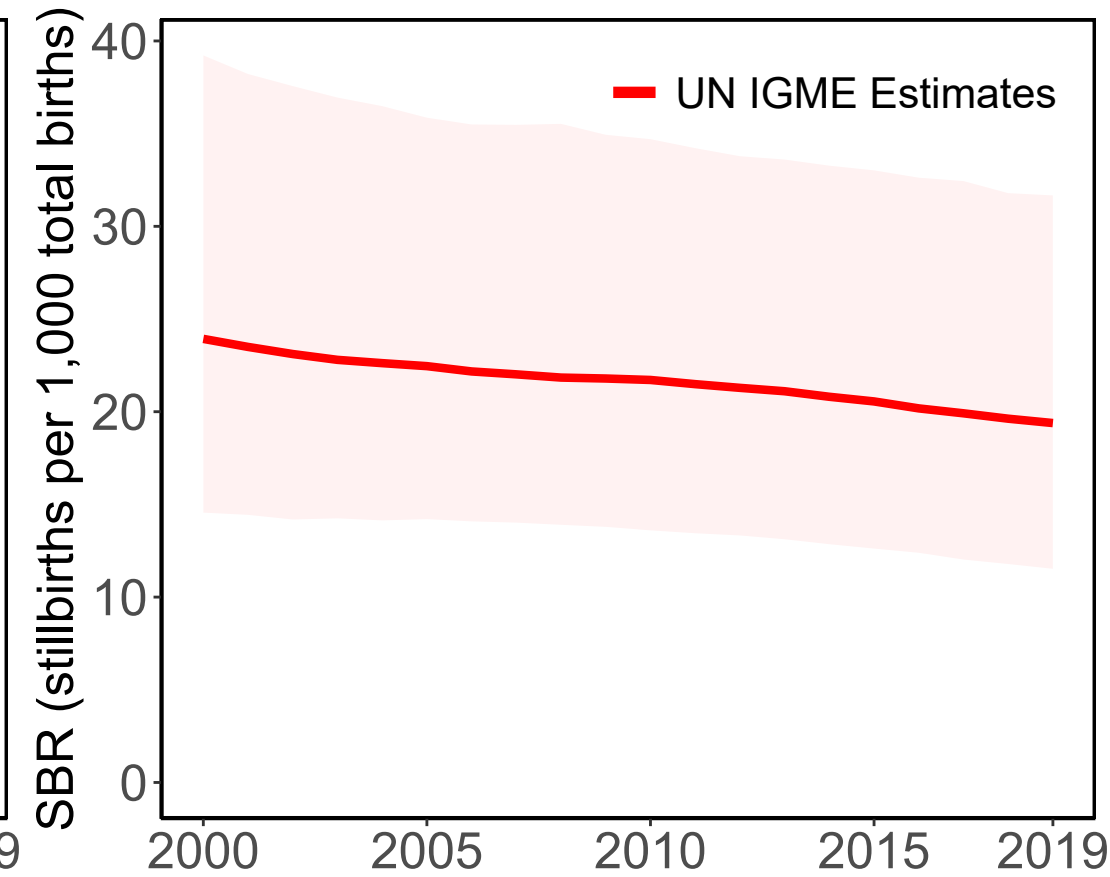

#### Source Types



Survey

#### Data Sources



Demographic and Health Survey 2018 (DHS)  
(PH) (28wks)

# Democratic Republic of the Congo

Available Data

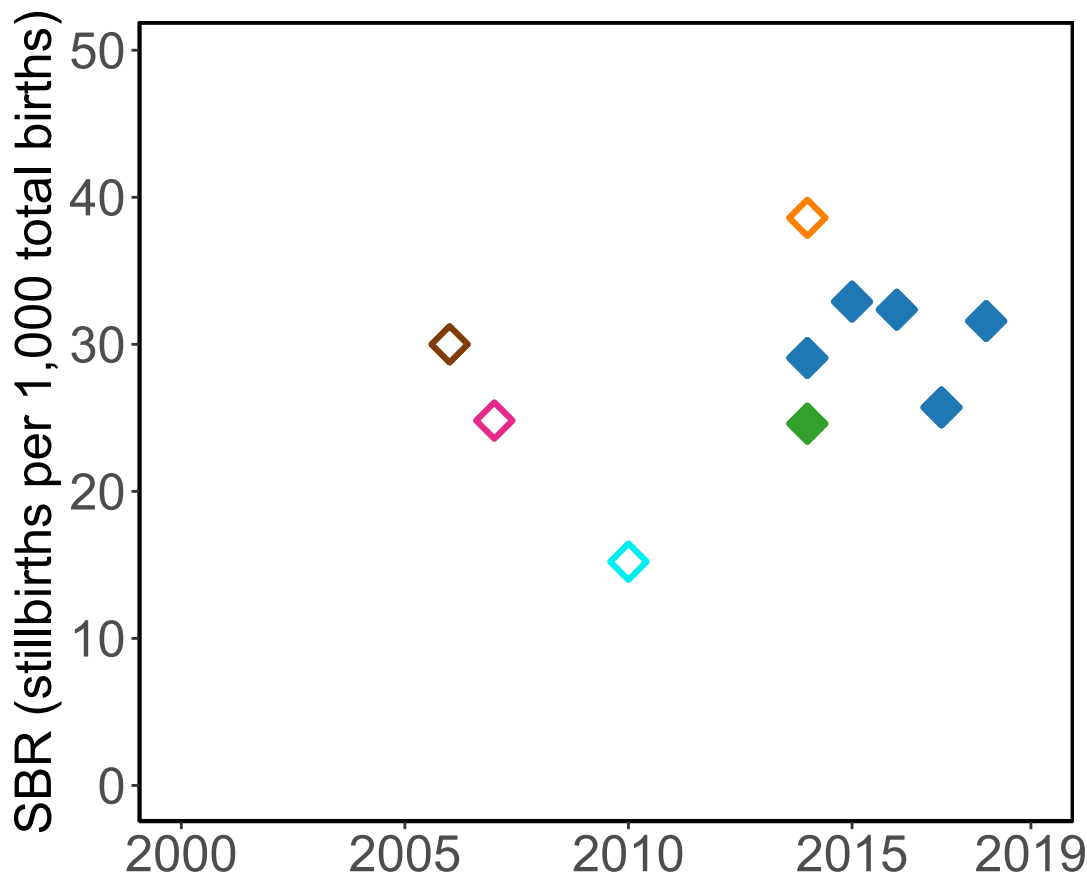

'28+ Weeks of Gestation' Data  
(Incl. Adjusted Data)

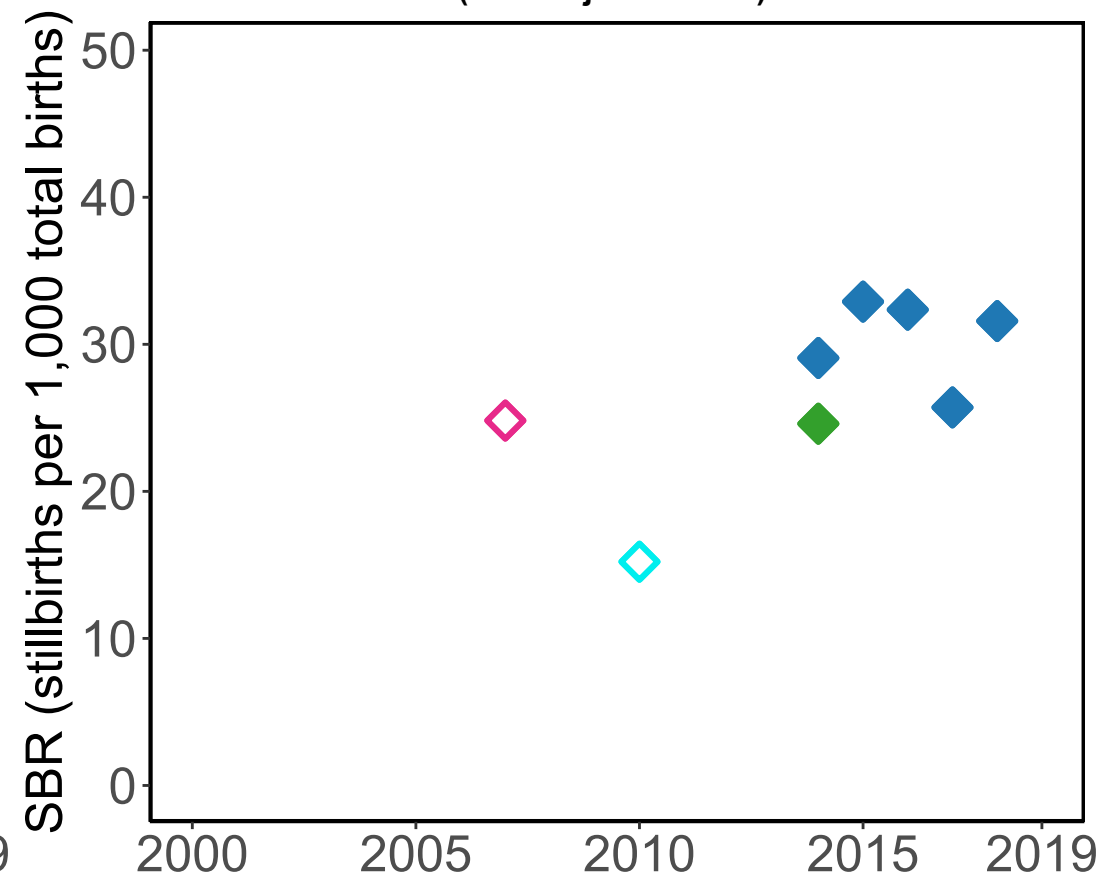

Data Included in the Model

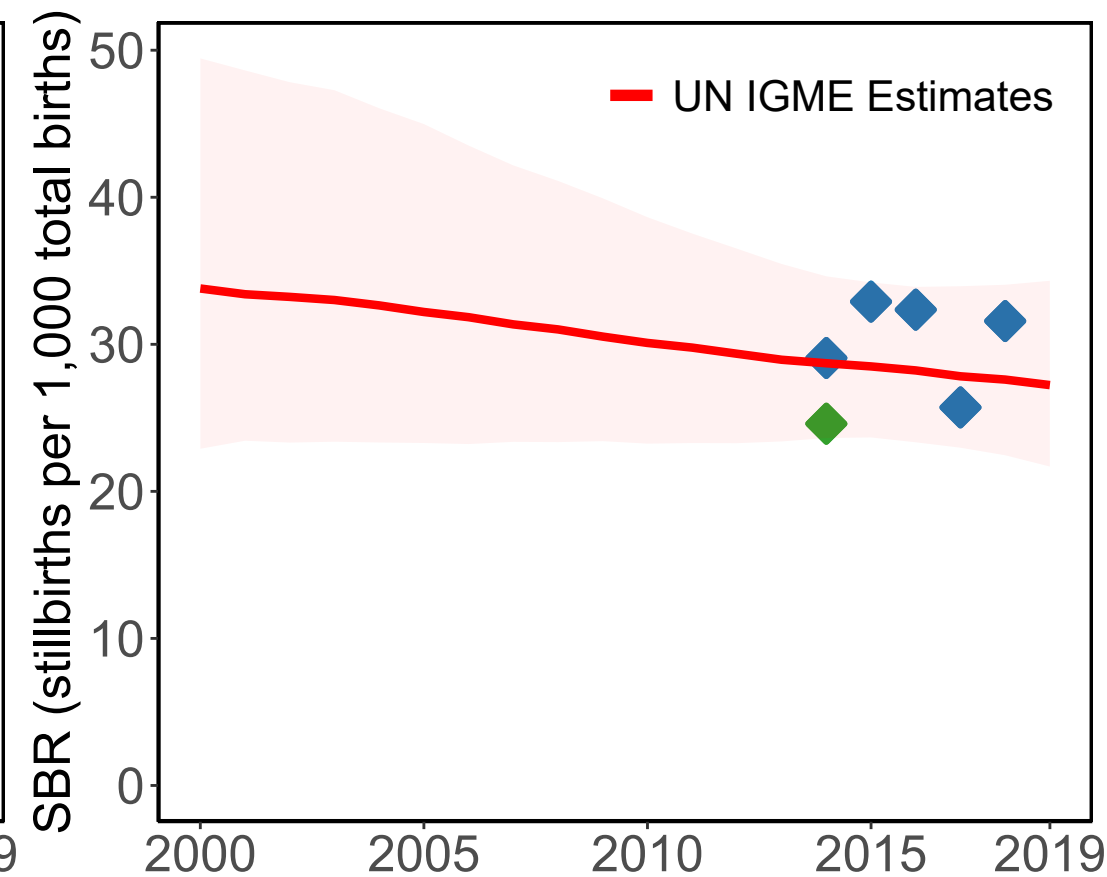

Source Types

Population study

Data Sources

Global Network Re-analysed (28wks)

AMANHI 2018 (28wks)

McClure 2018 (500g or 20wks)

Ntambue 2013 (28wks)

McClure 2011 (28wks)

McClure 2007 (1000g)

UN IGME Estimates

# Congo

### Available Data

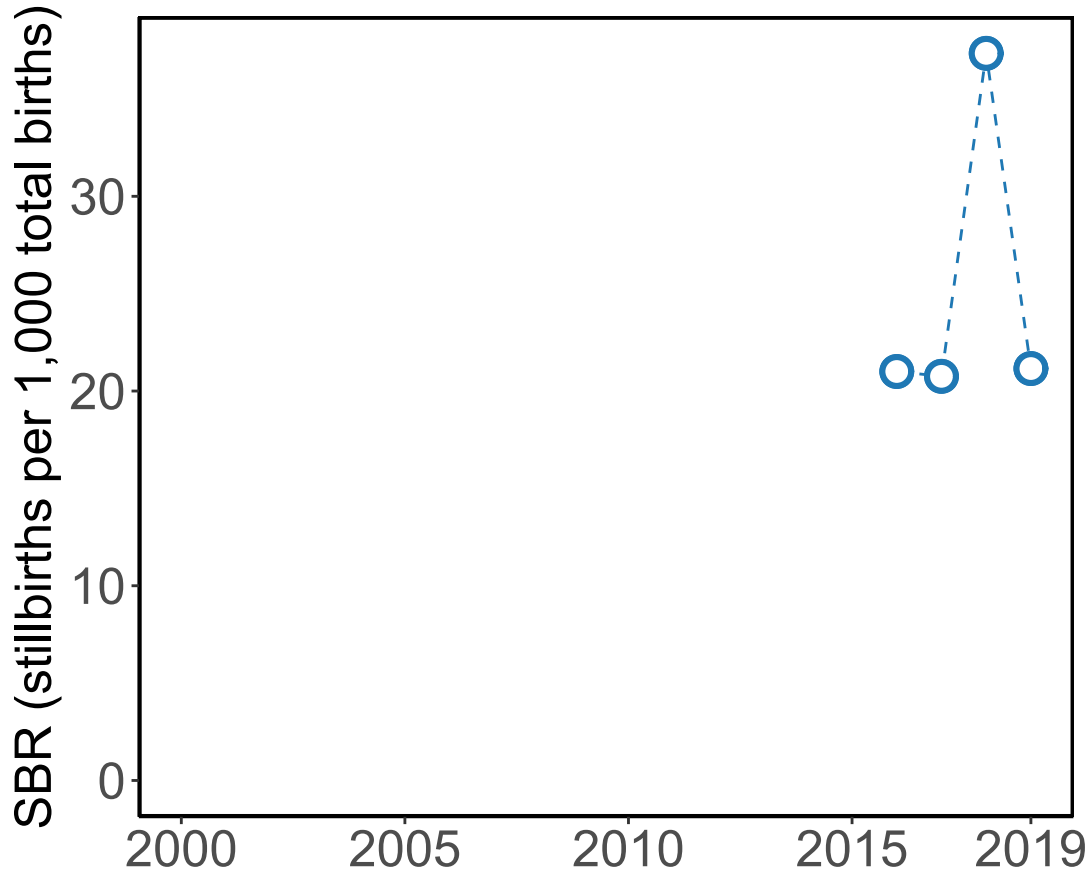

### '28+ Weeks of Gestation' Data (Incl. Adjusted Data)

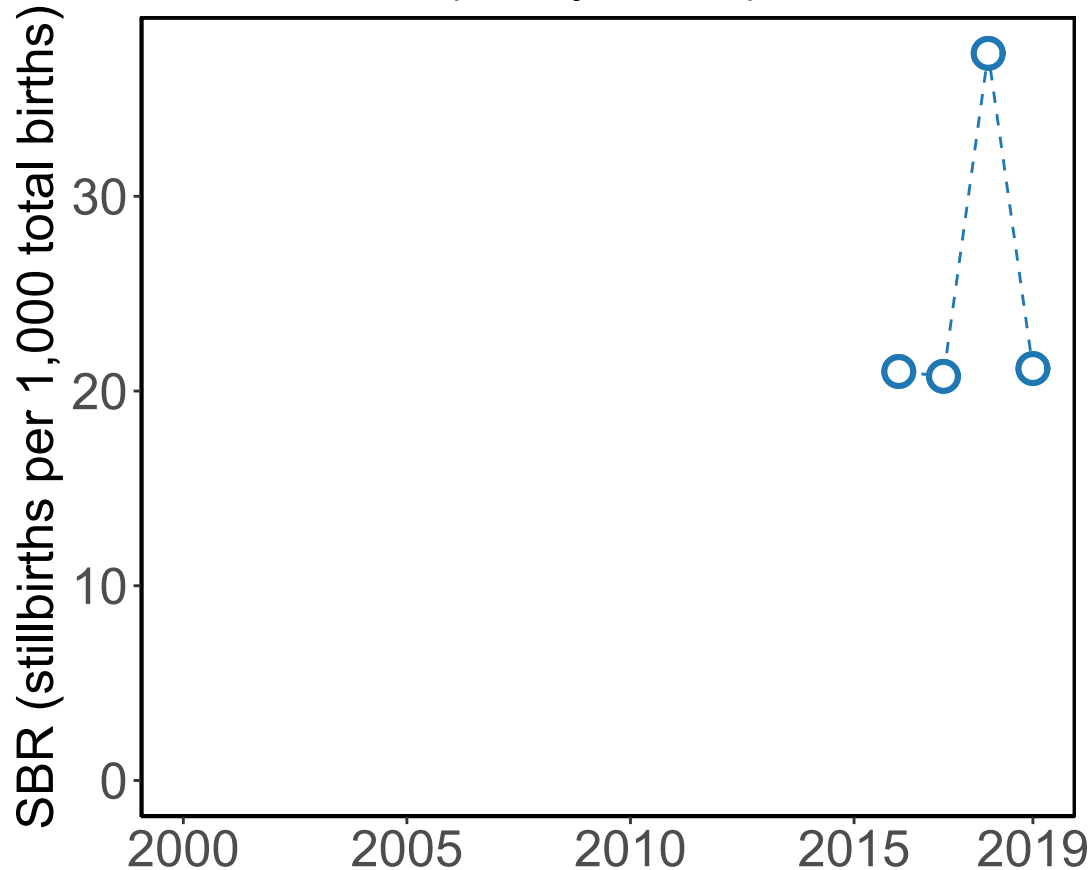

### Data Included in the Model

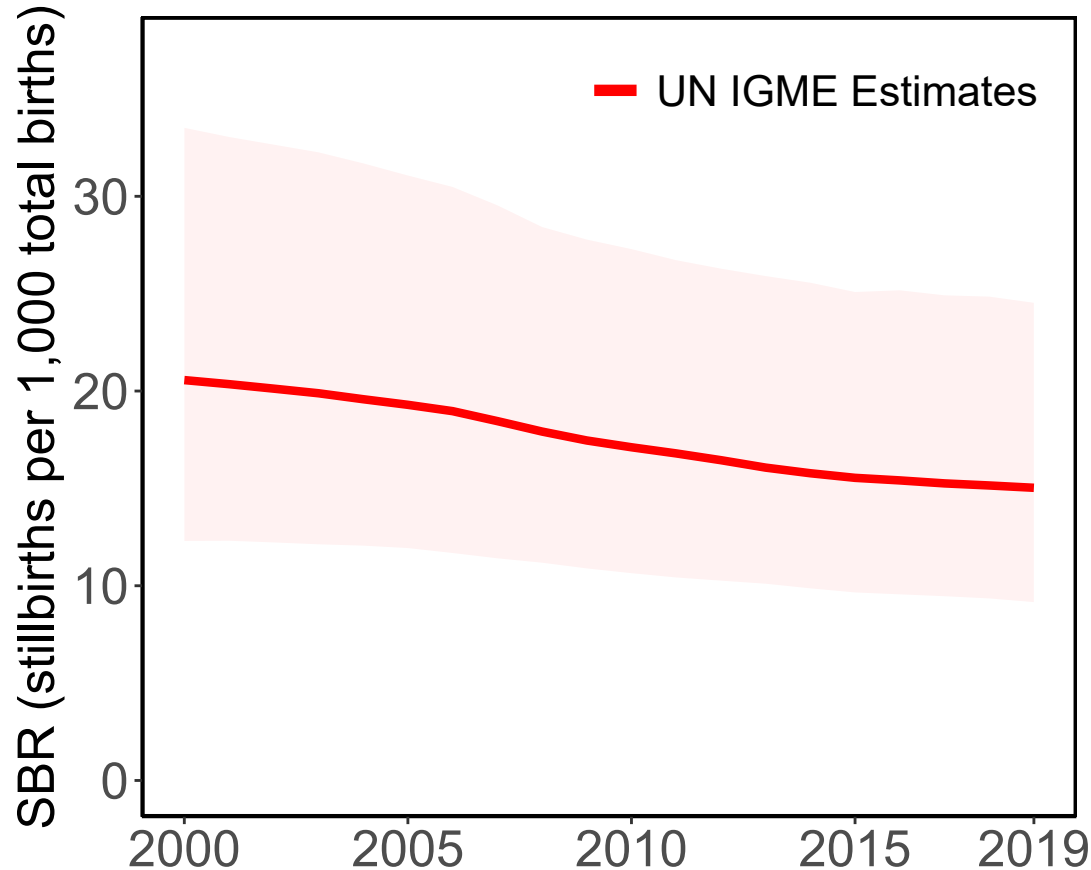

#### Source Types

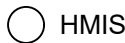

HMIS

#### Data Sources

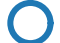

HMIS-DHIS2 (28wks)



# Cook Islands

### Available Data

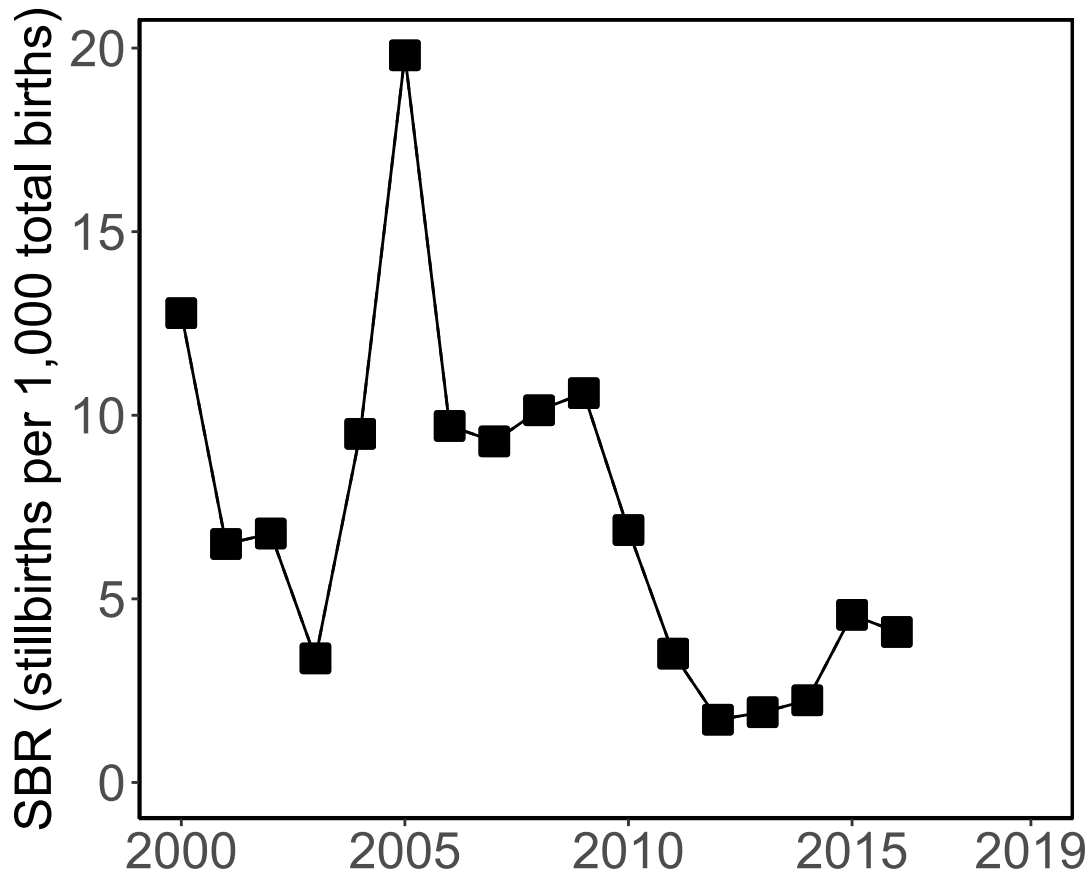

### '28+ Weeks of Gestation' Data (Incl. Adjusted Data)

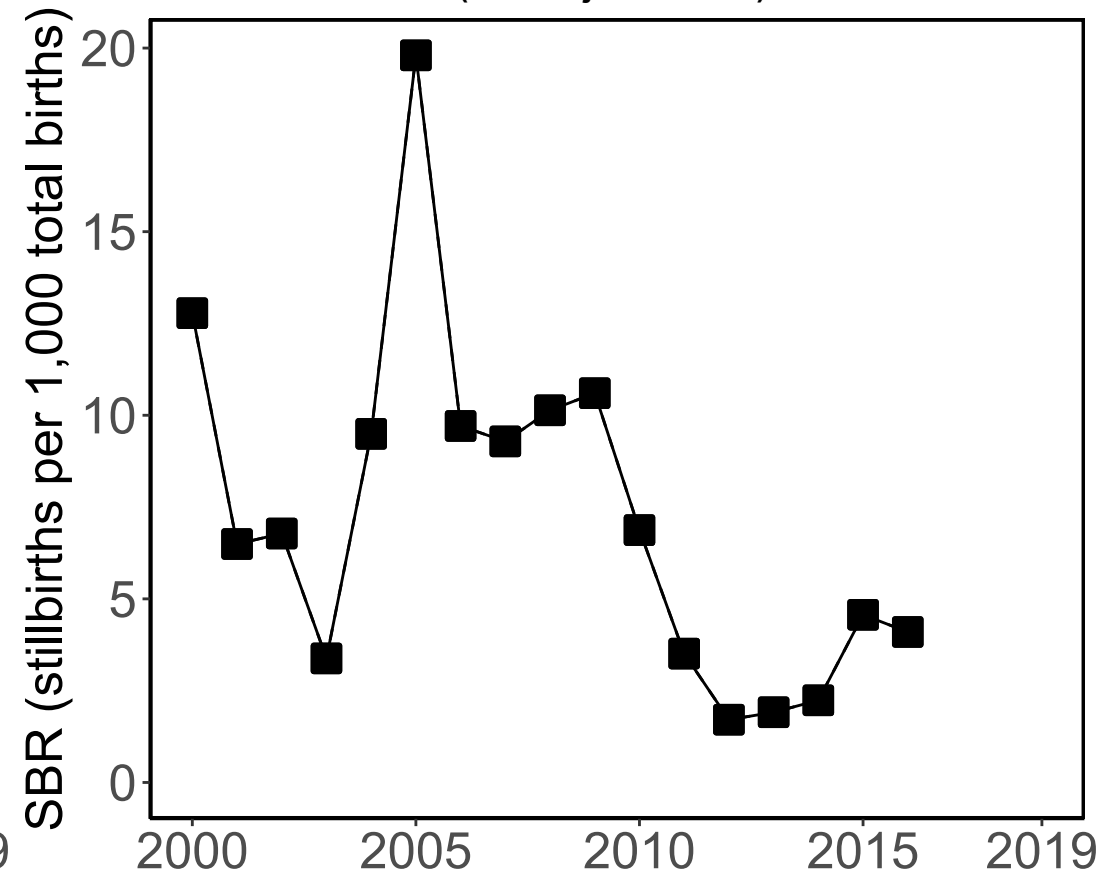

### Data Included in the Model

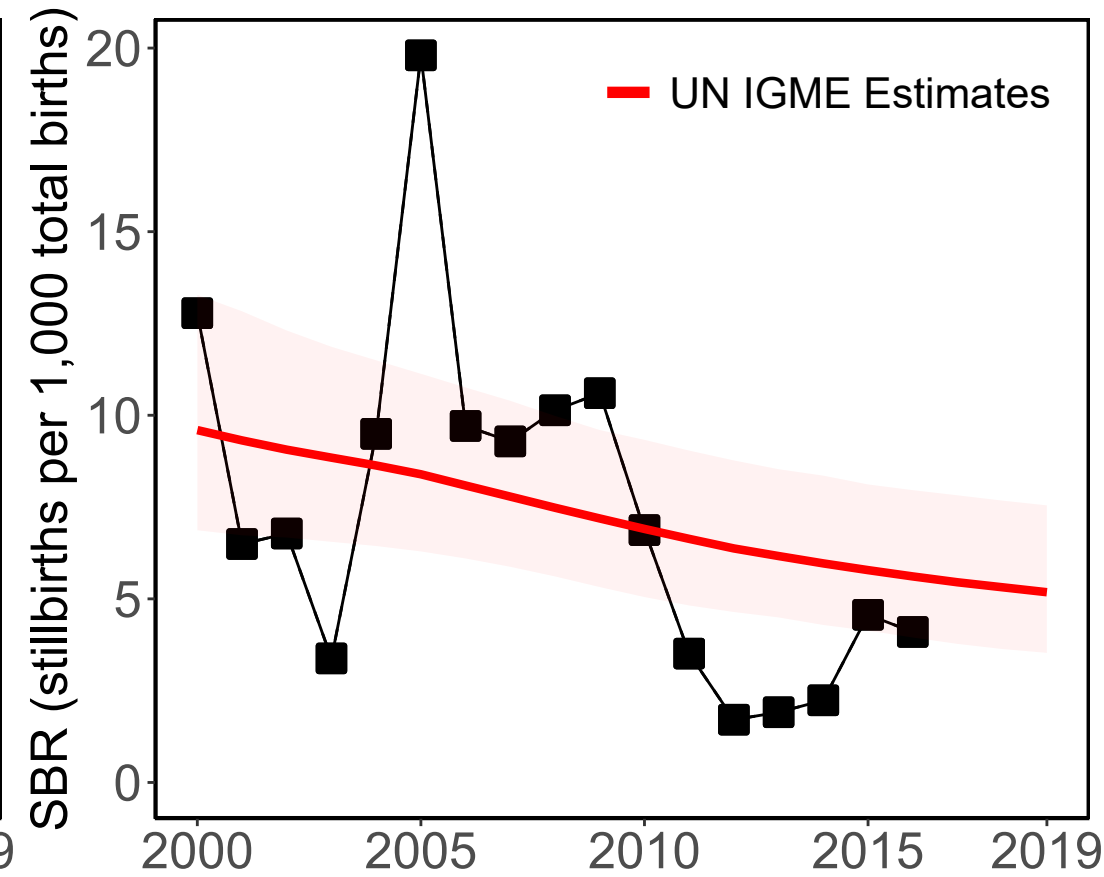

### Source Types

□ Administrative

### Data Sources

■ Vital Registration (28wks)

# Colombia

Available Data

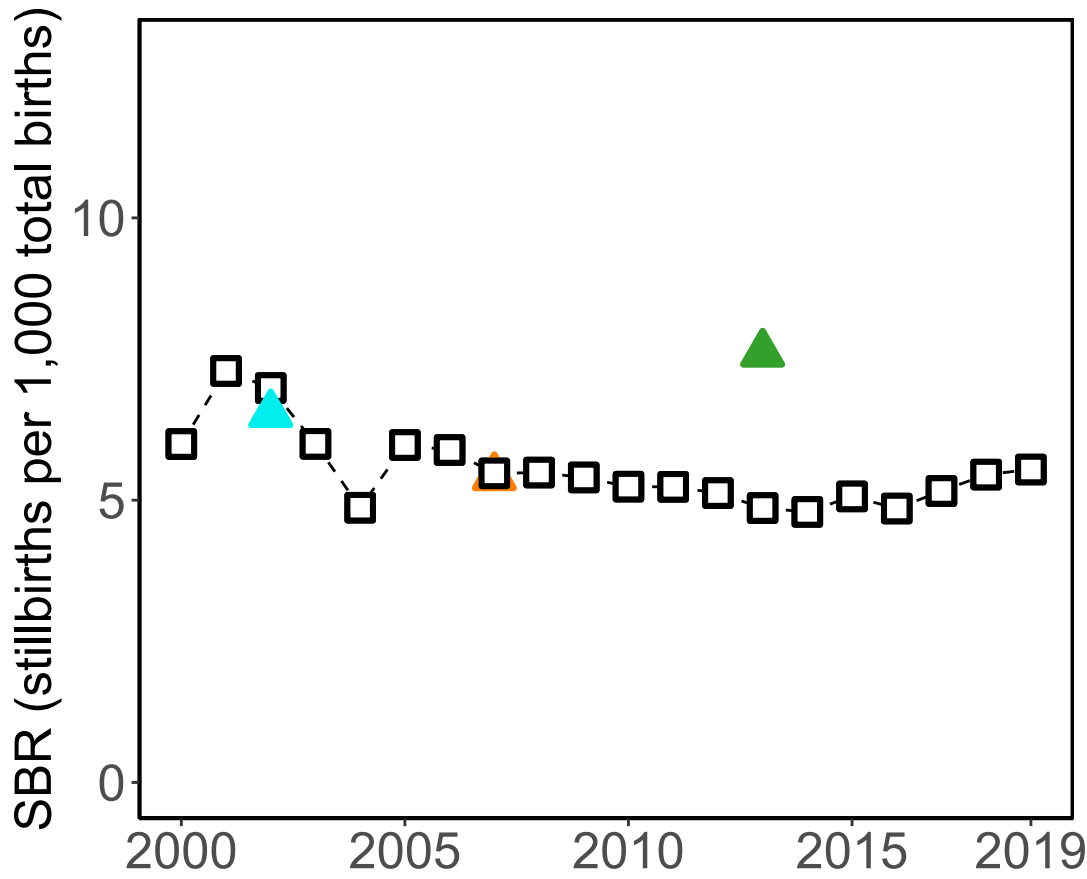

'28+ Weeks of Gestation' Data  
(Incl. Adjusted Data)

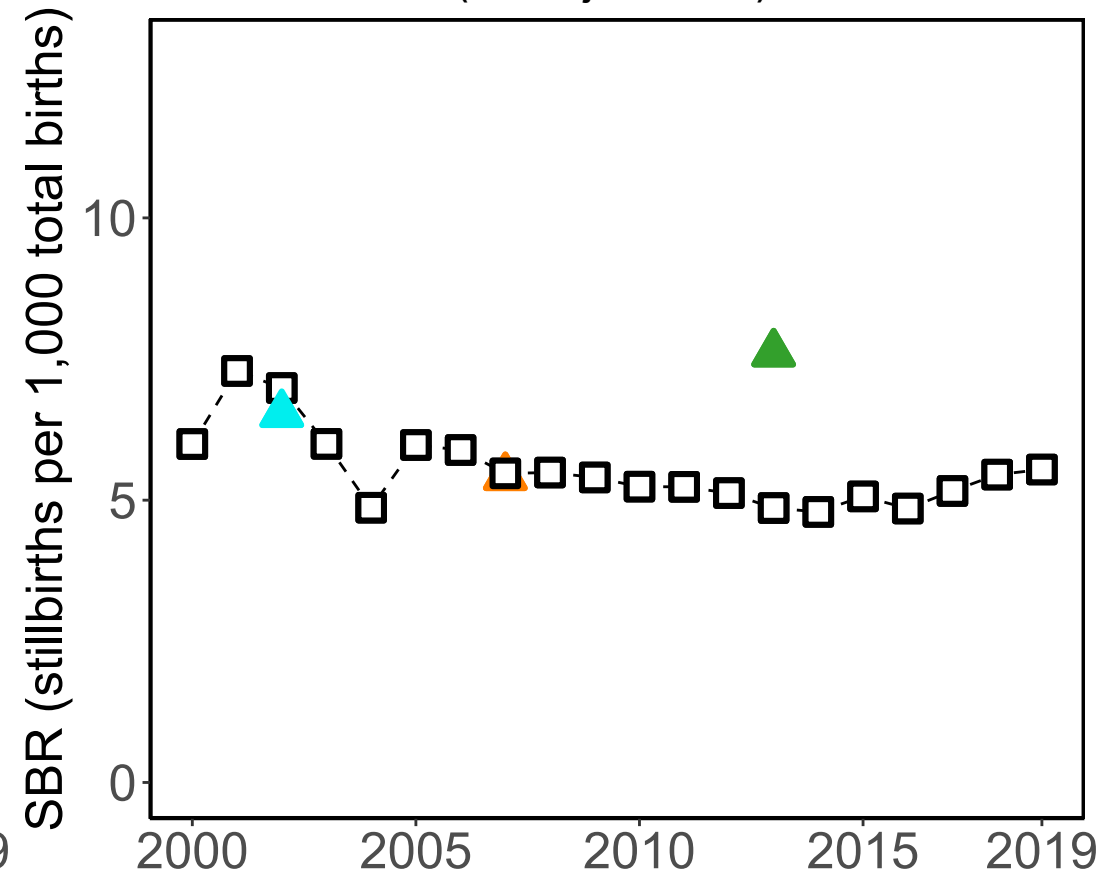

Data Included in the Model

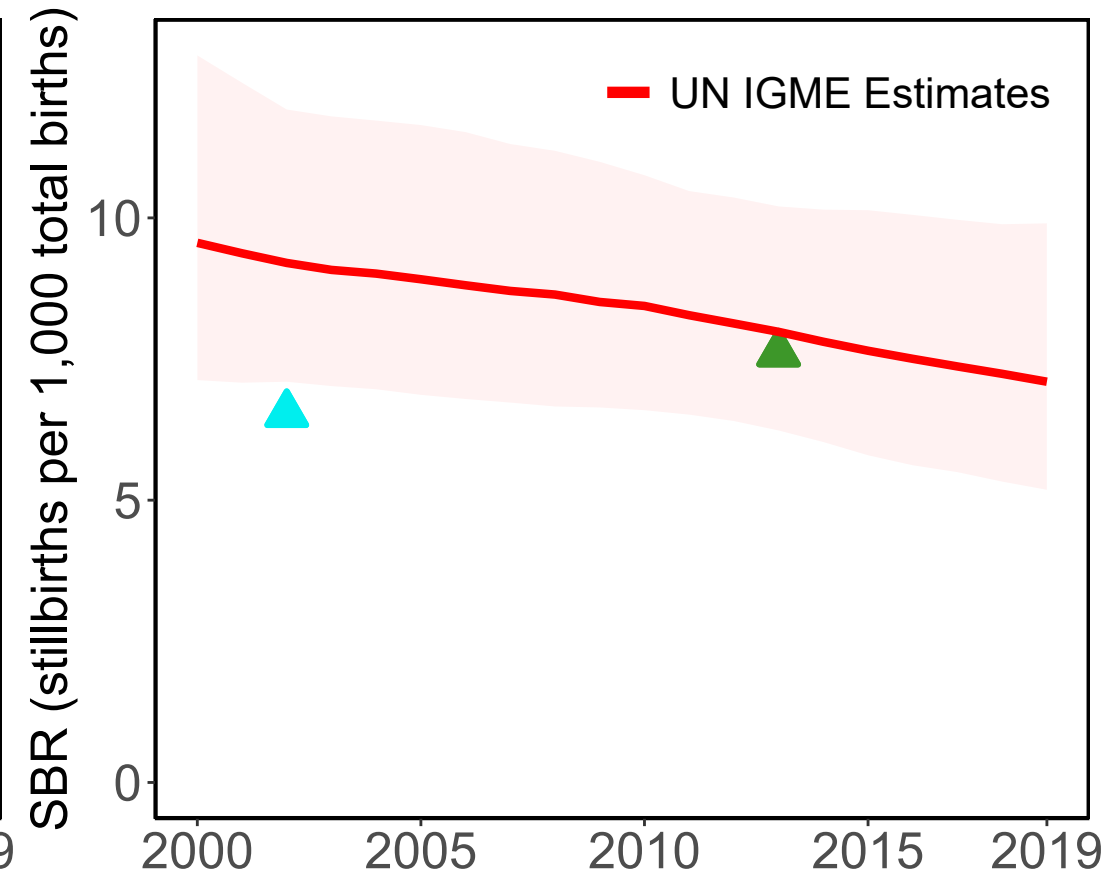

Source Types

□ Administrative    △ Survey

Data Sources

□ Vital Registration (28wks)

▲ Encuesta Nacional de Demografía y Salud 2015 (DHS) (RC) (28wks)

▲ Encuesta Nacional de Demografía y Salud 2010 (DHS) (RC) (28wks)

▲ Encuesta Nacional de Demografía y Salud 2005 (DHS) (RC) (28wks)

# Comoros

### Available Data

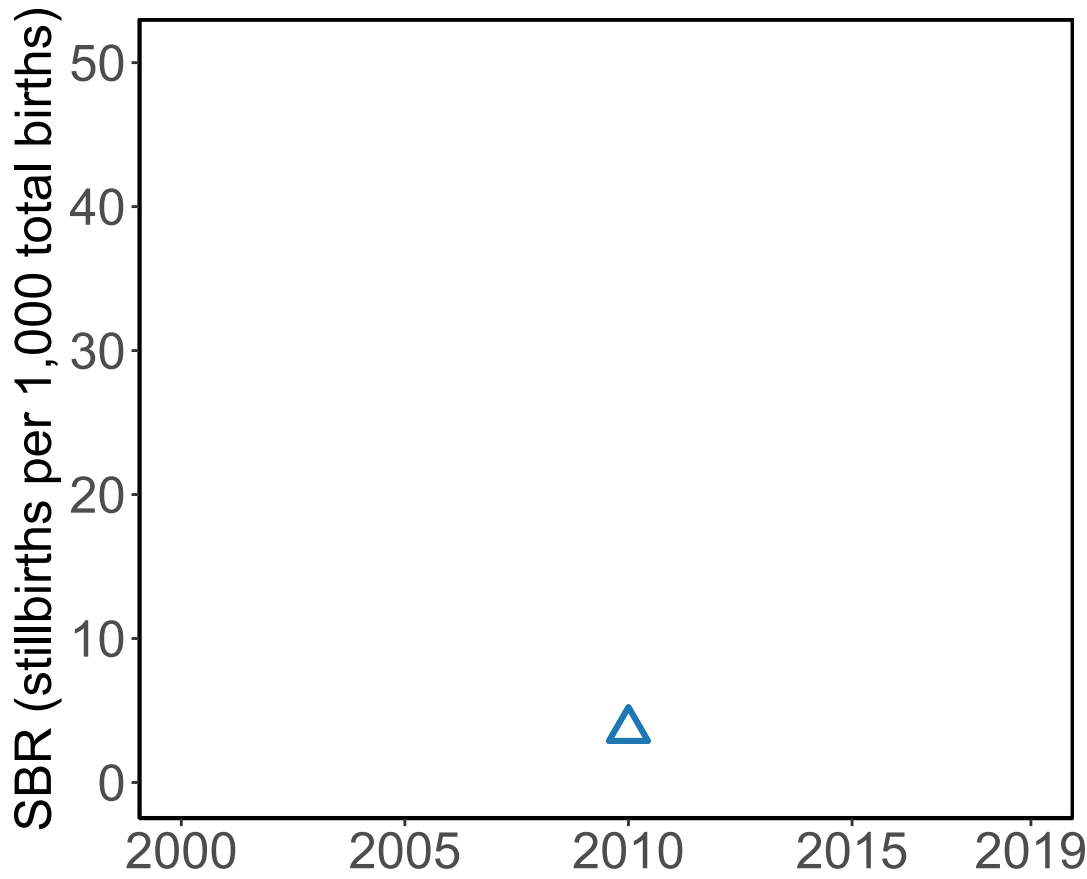

### '28+ Weeks of Gestation' Data (Incl. Adjusted Data)

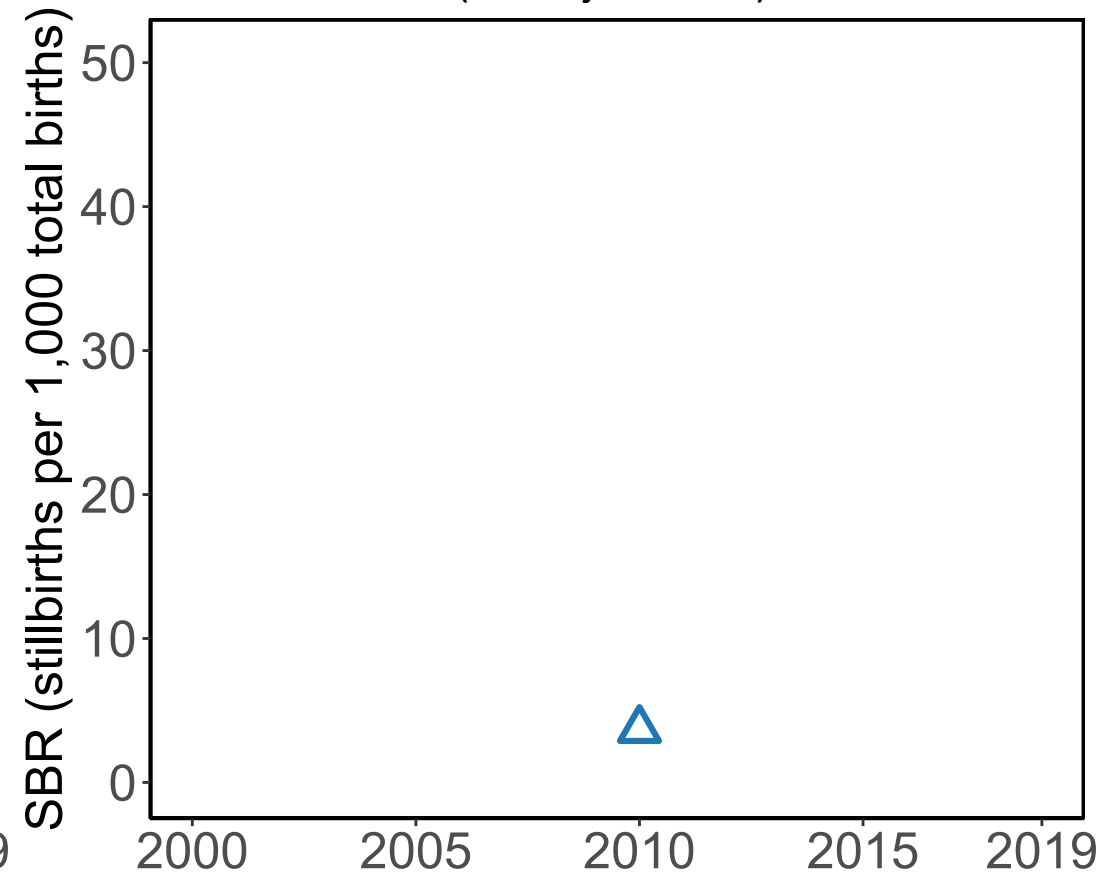

### Data Included in the Model

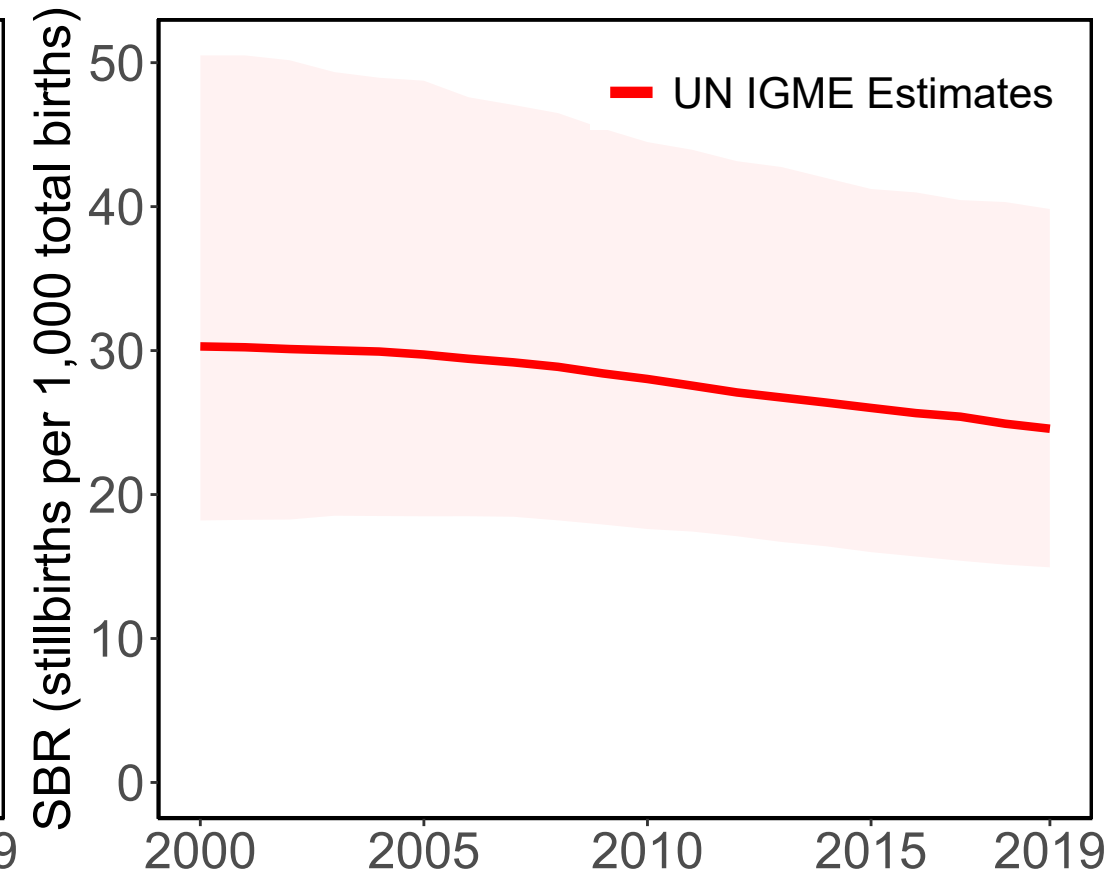

#### Source Types



Survey

#### Data Sources

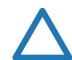

Deuxième Enquête Démographique, de Santé  
2012 (DHS) (RC) (28wks)

# Cape Verde

## Available Data

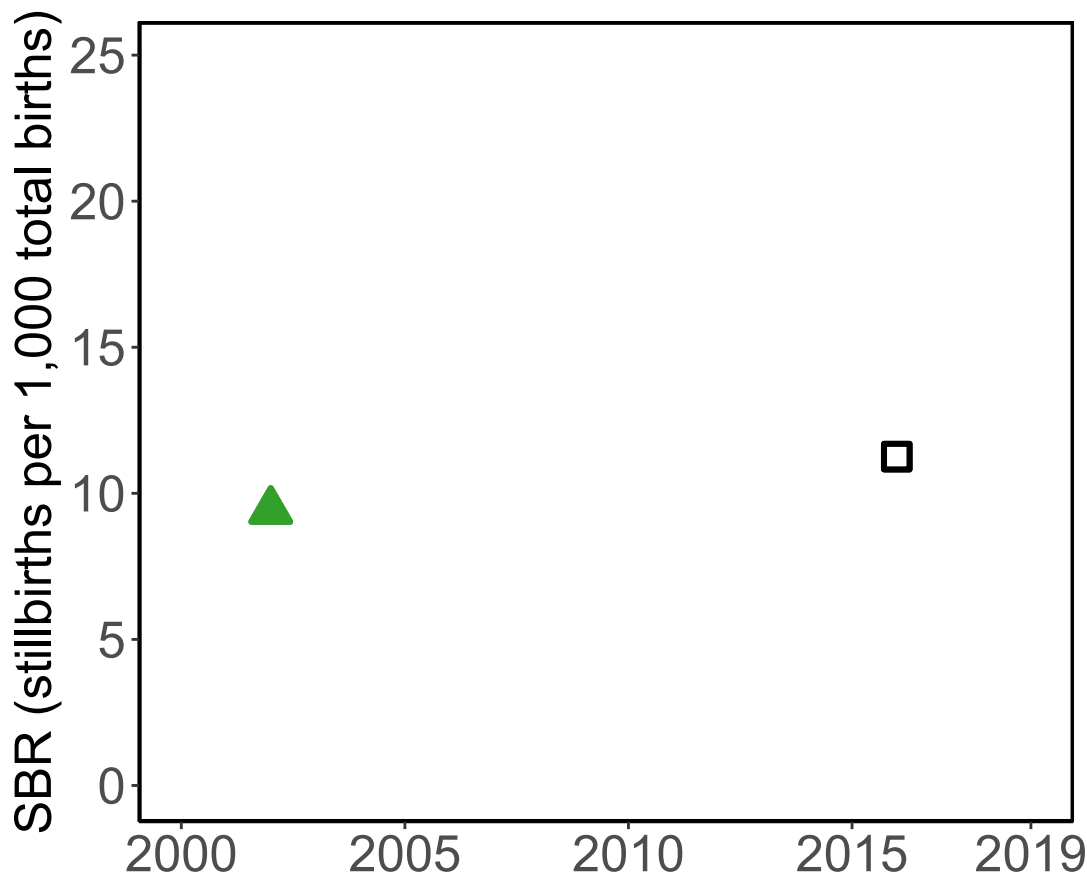

## '28+ Weeks of Gestation' Data (Incl. Adjusted Data)

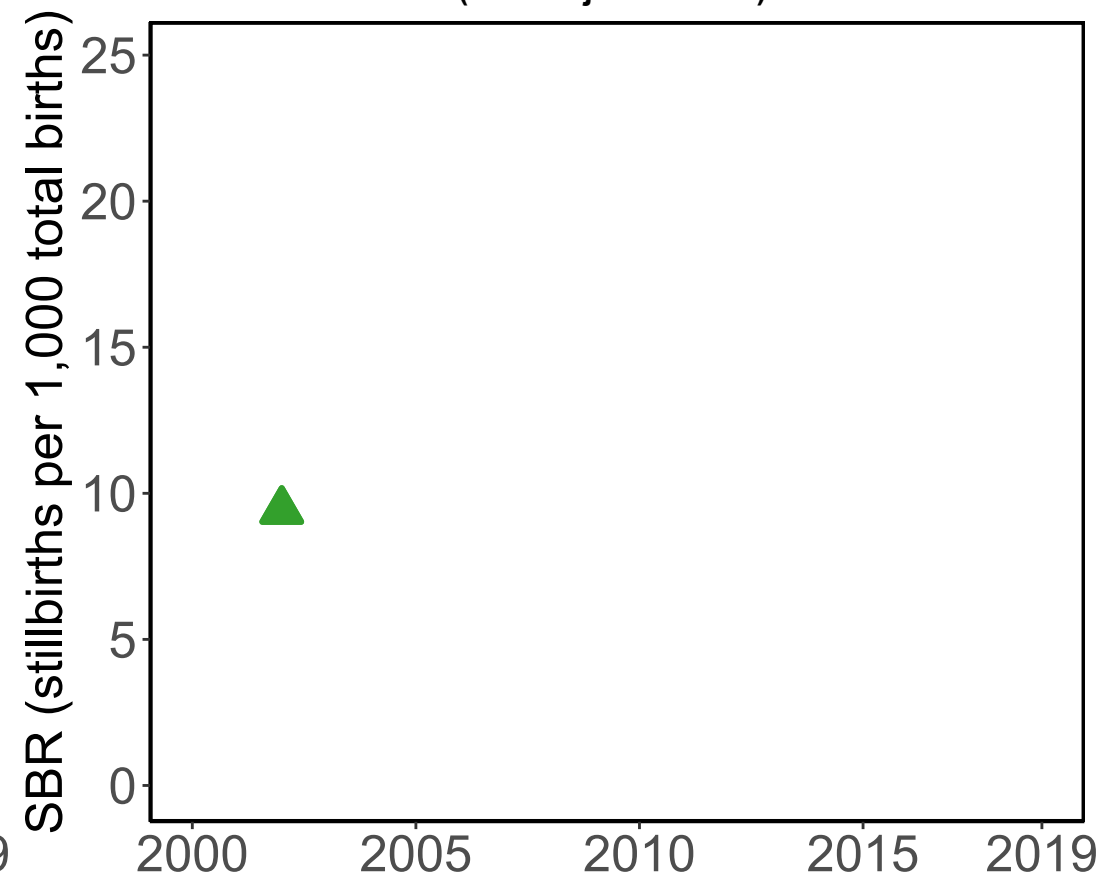

## Data Included in the Model

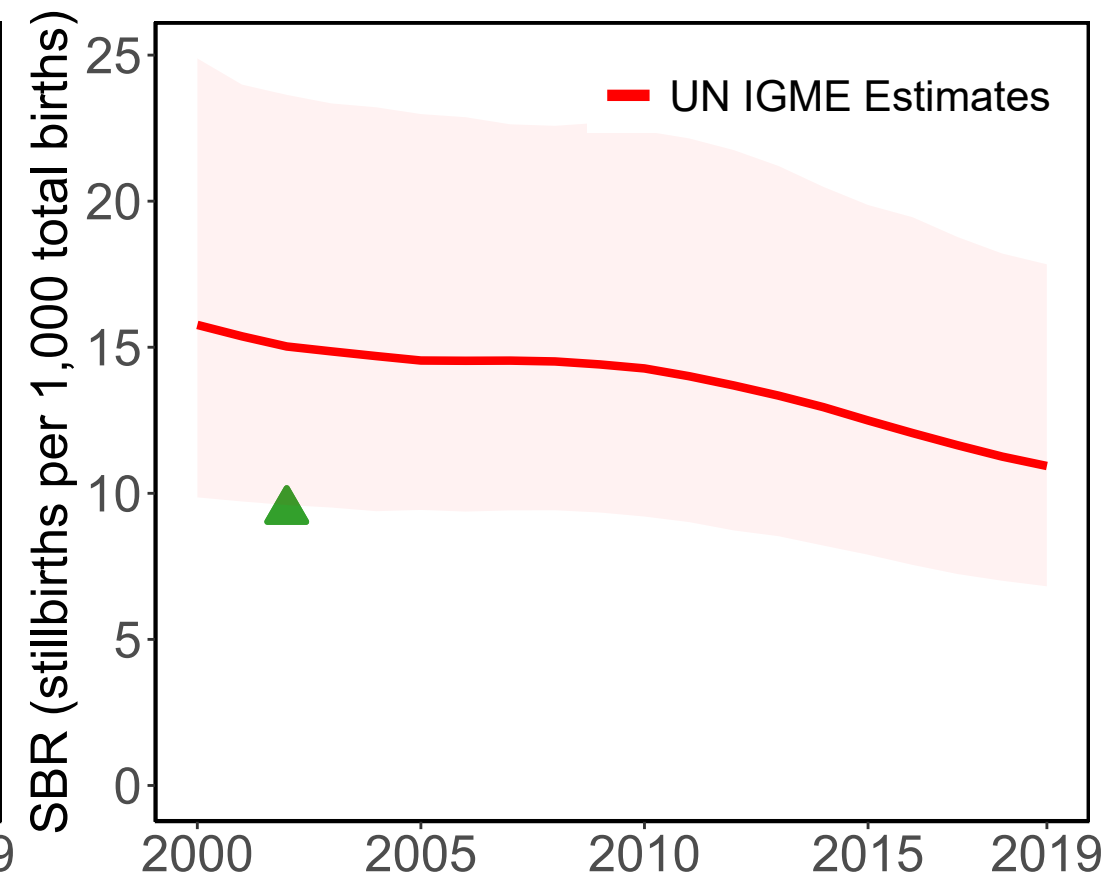

### Source Types

□ Administrative    △ Survey

### Data Sources

□ Vital Registration (any gestational age or birthweight)    ▲ II Inquérito Demográfico e de Saúde Reprodutiva 2005 (DHS) (RC) (28wks)

# Costa Rica

### Available Data

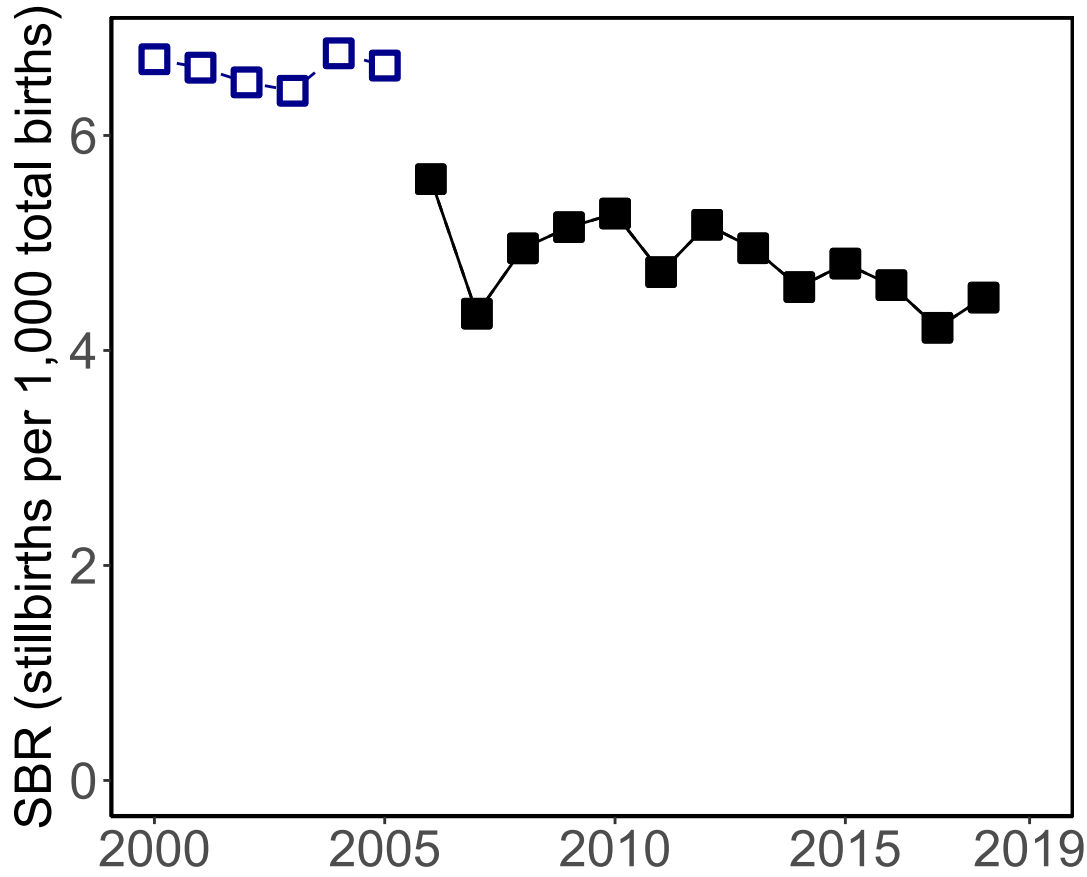

### '28+ Weeks of Gestation' Data (Incl. Adjusted Data)

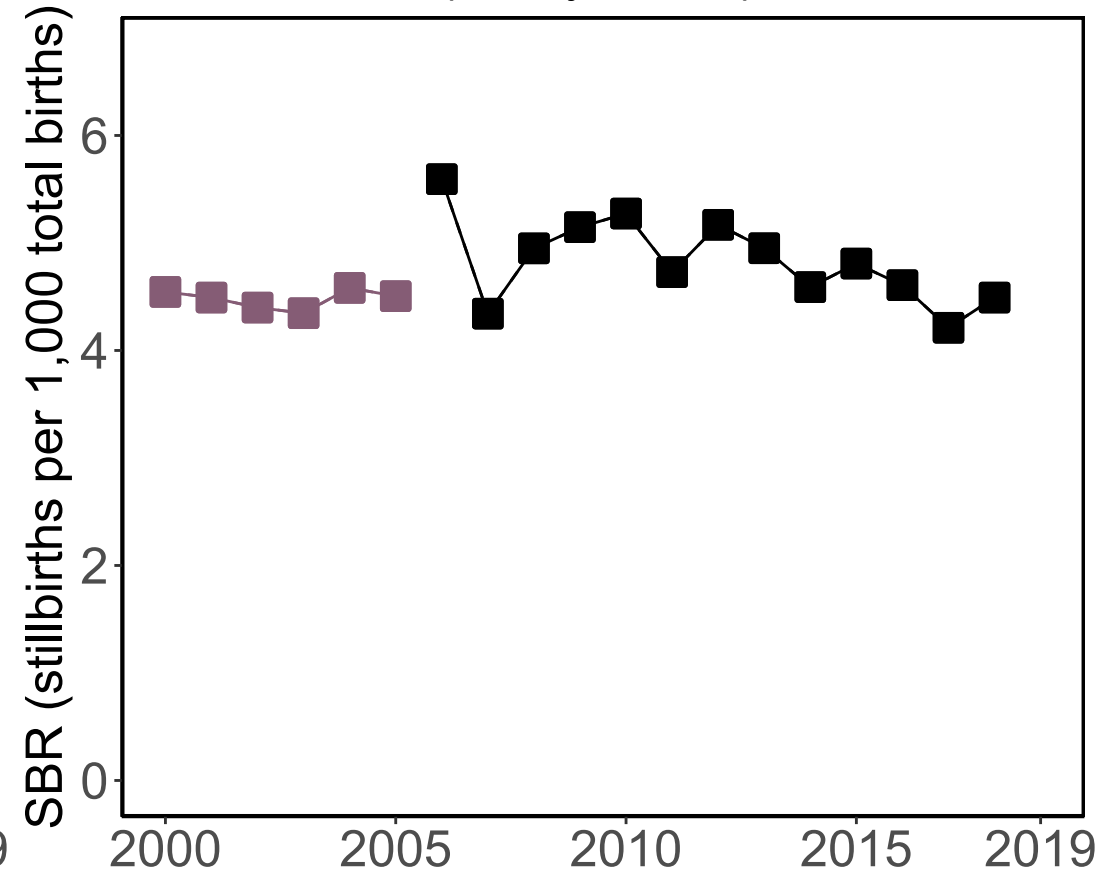

### Data Included in the Model

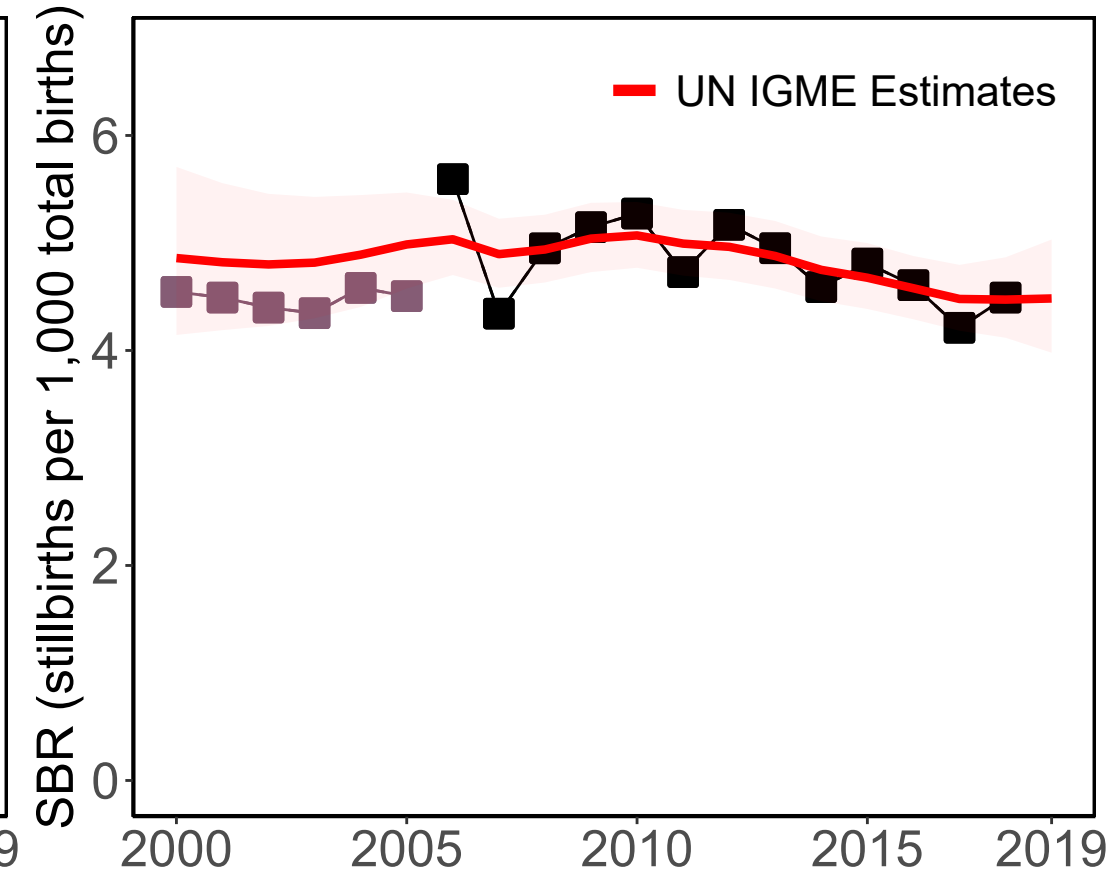

#### Source Types

□ Administrative

#### Data Sources

■ Vital Registration (28wks)

□ Vital Registration (22wks)

■ Vital Registration (28wks adj from 22wks)

— UN IGME Estimates

# Cuba

### Available Data

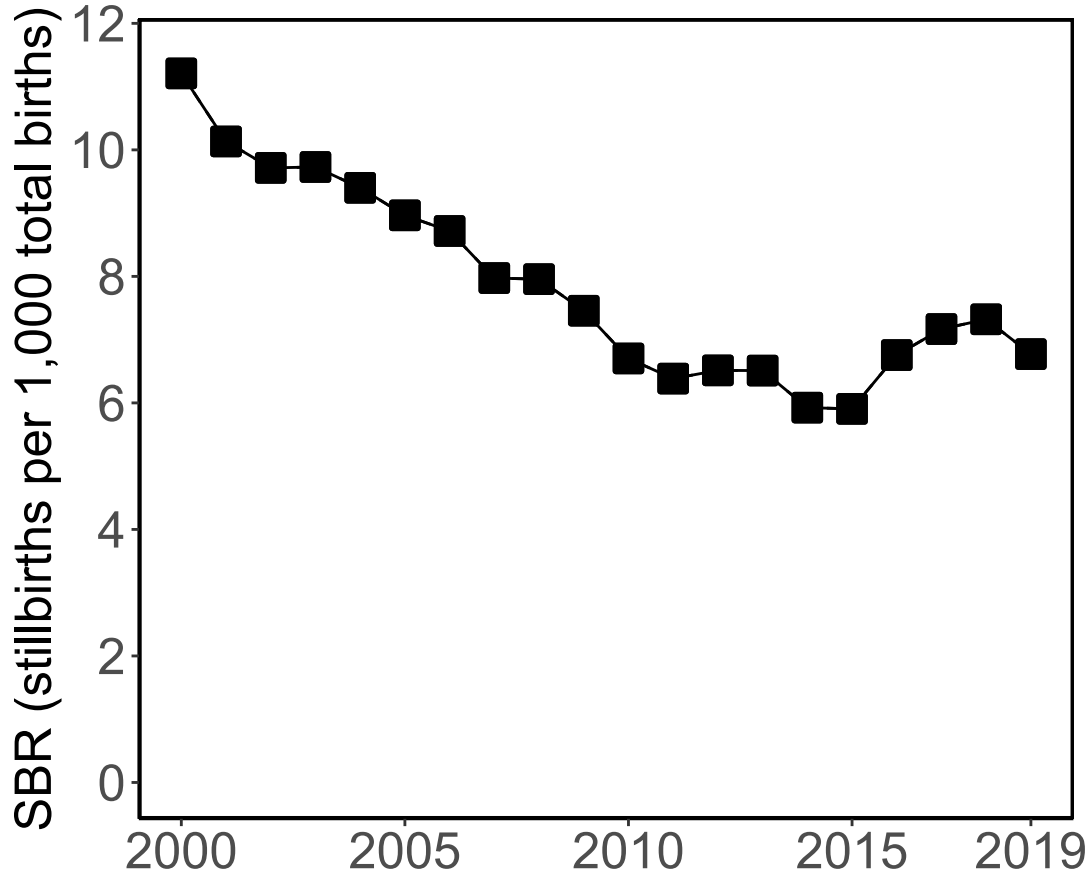

### '28+ Weeks of Gestation' Data (Incl. Adjusted Data)

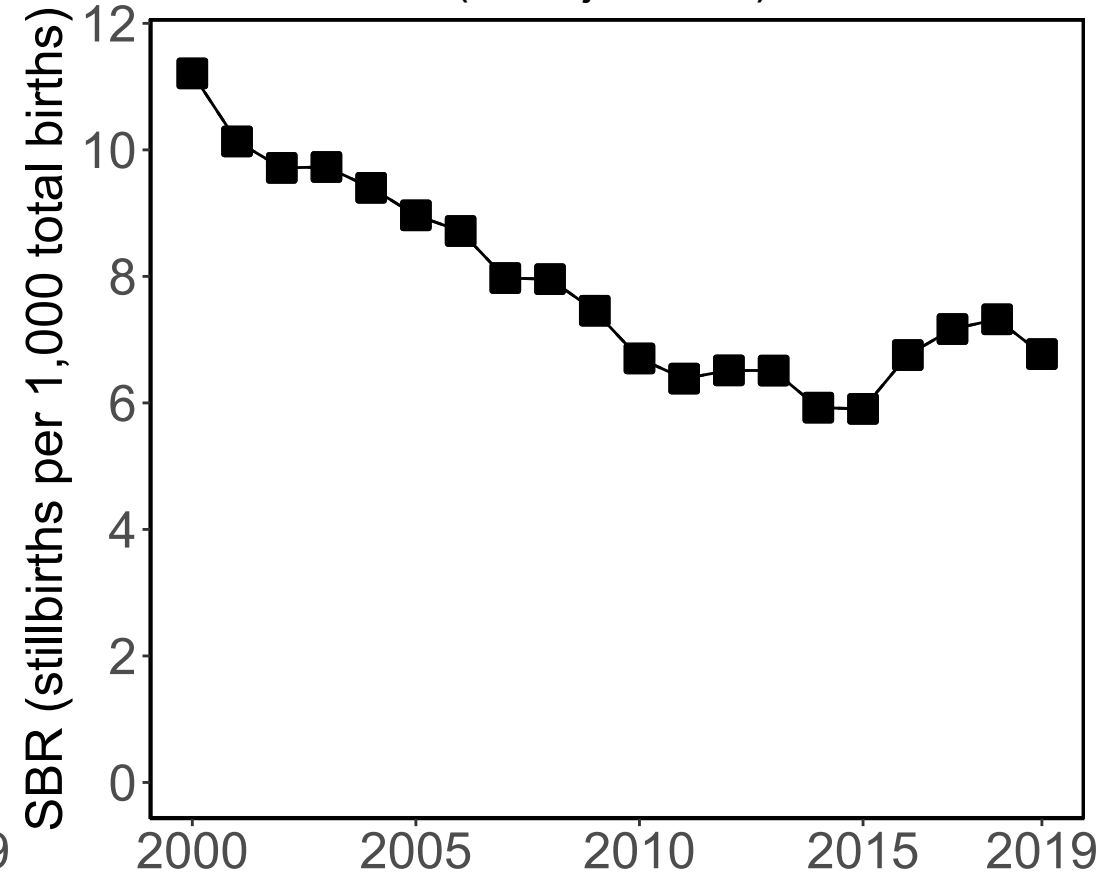

### Data Included in the Model

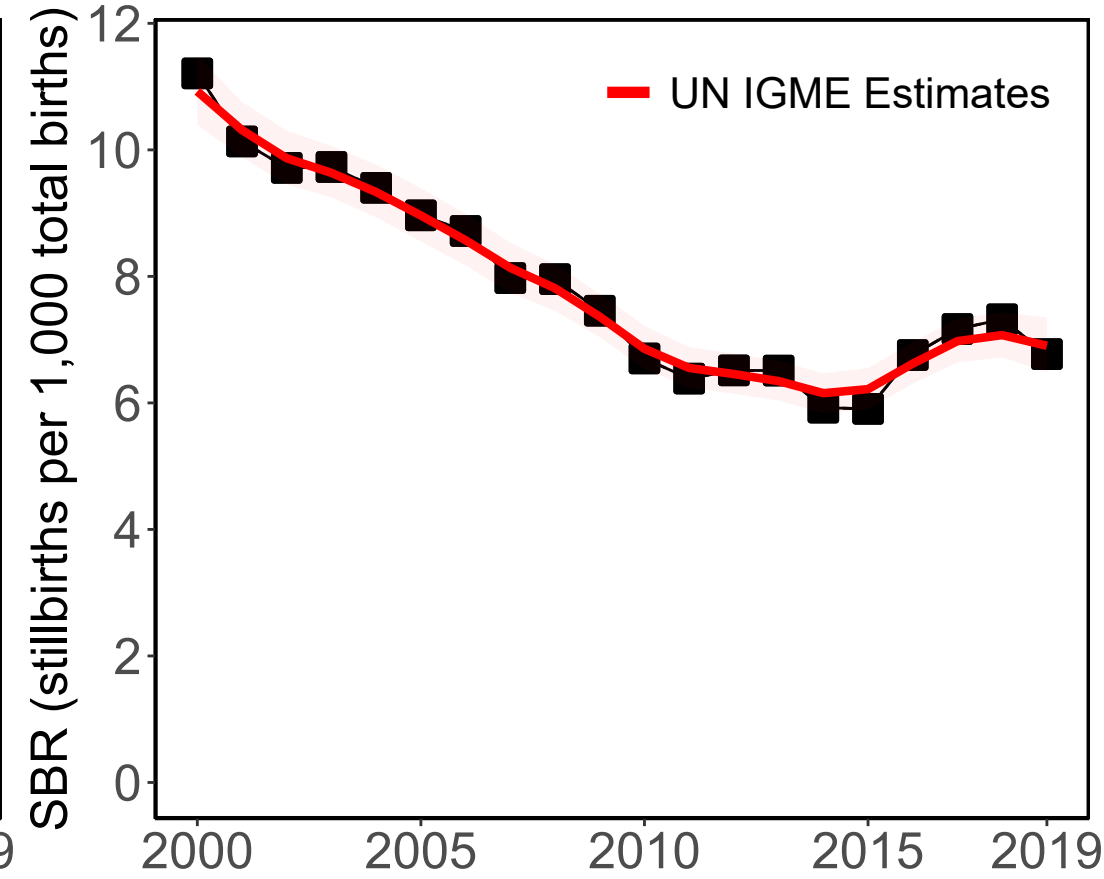

#### Source Types

Administrative

#### Data Sources

Vital Registration (28wks)

# Cyprus

### Available Data

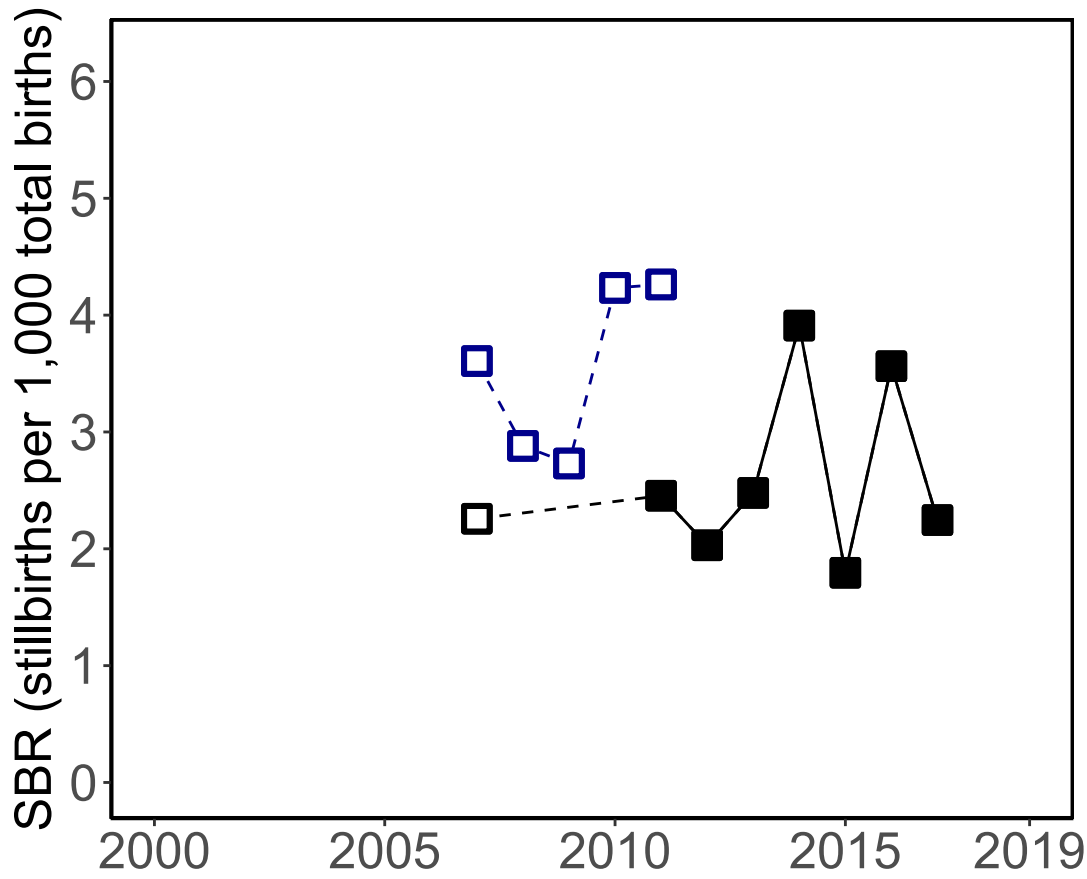

### '28+ Weeks of Gestation' Data (Incl. Adjusted Data)

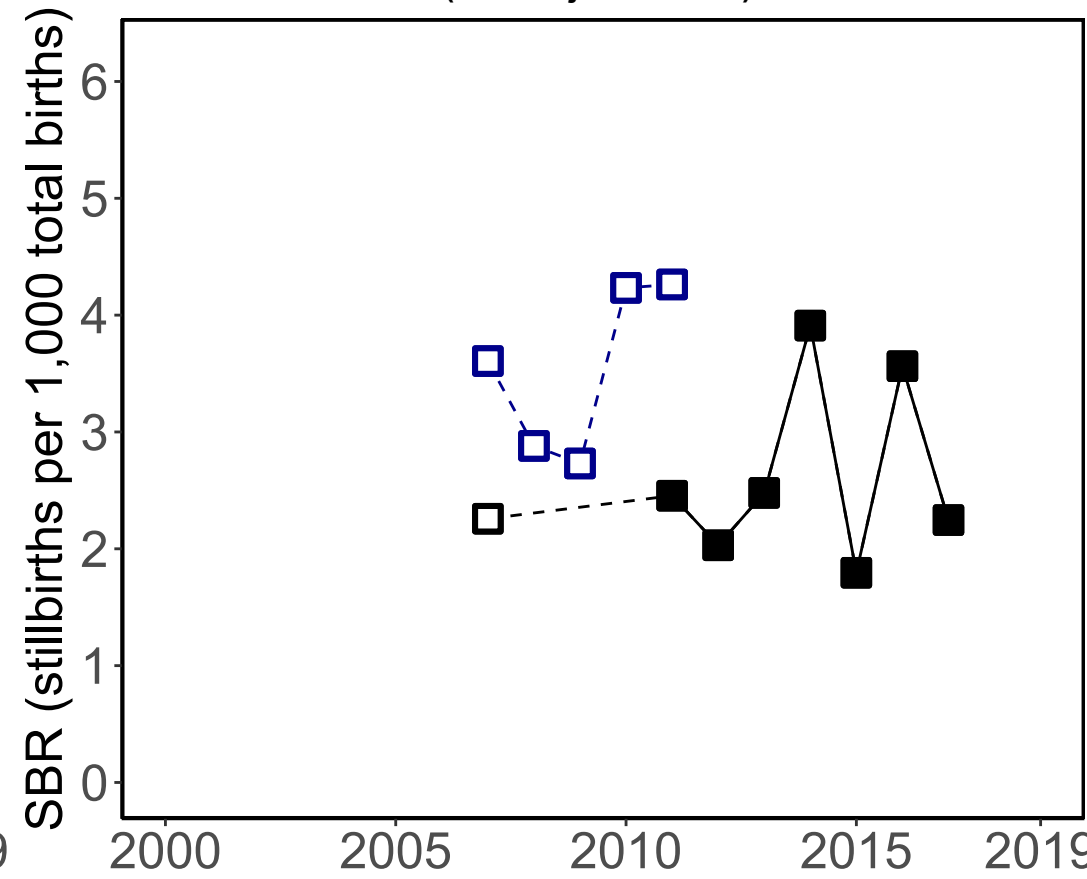

### Data Included in the Model

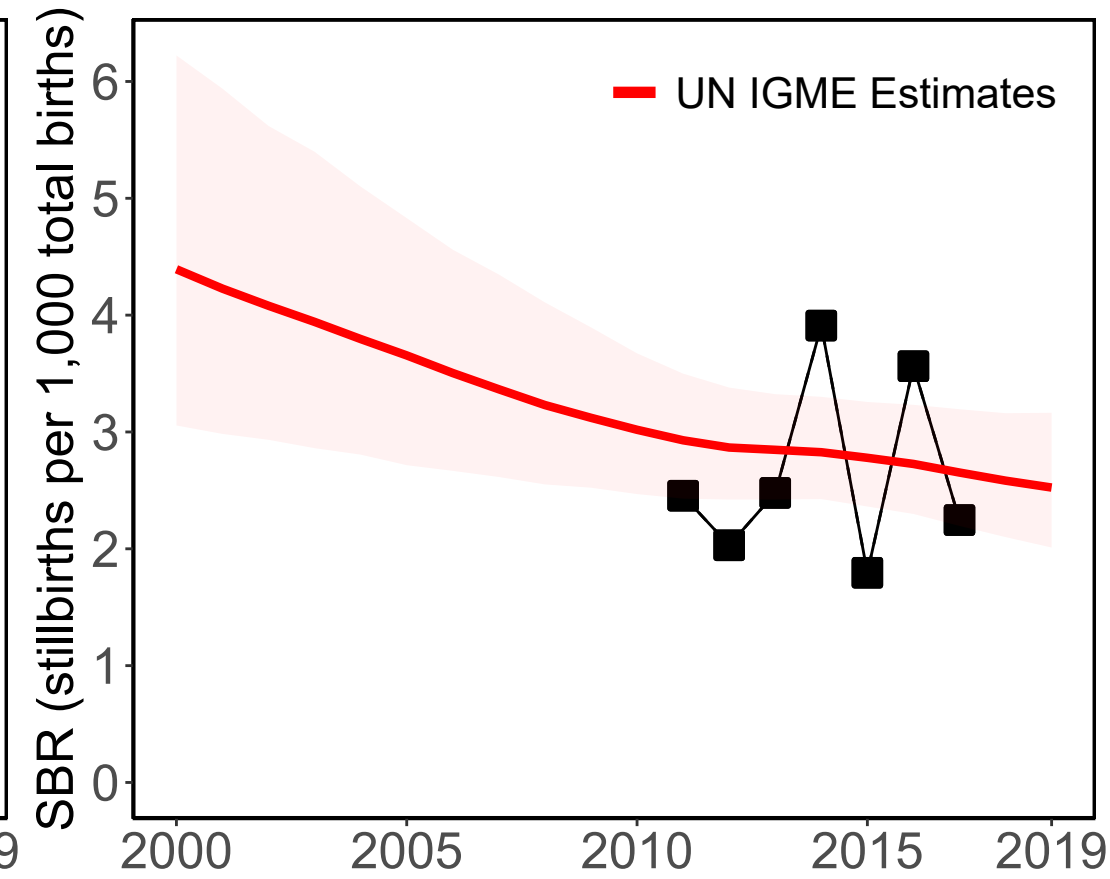

#### Source Types

□ Administrative

#### Data Sources

■ Vital Registration (28wks)

□ Birth or Death Registry (28wks)

# Czechia

### Available Data

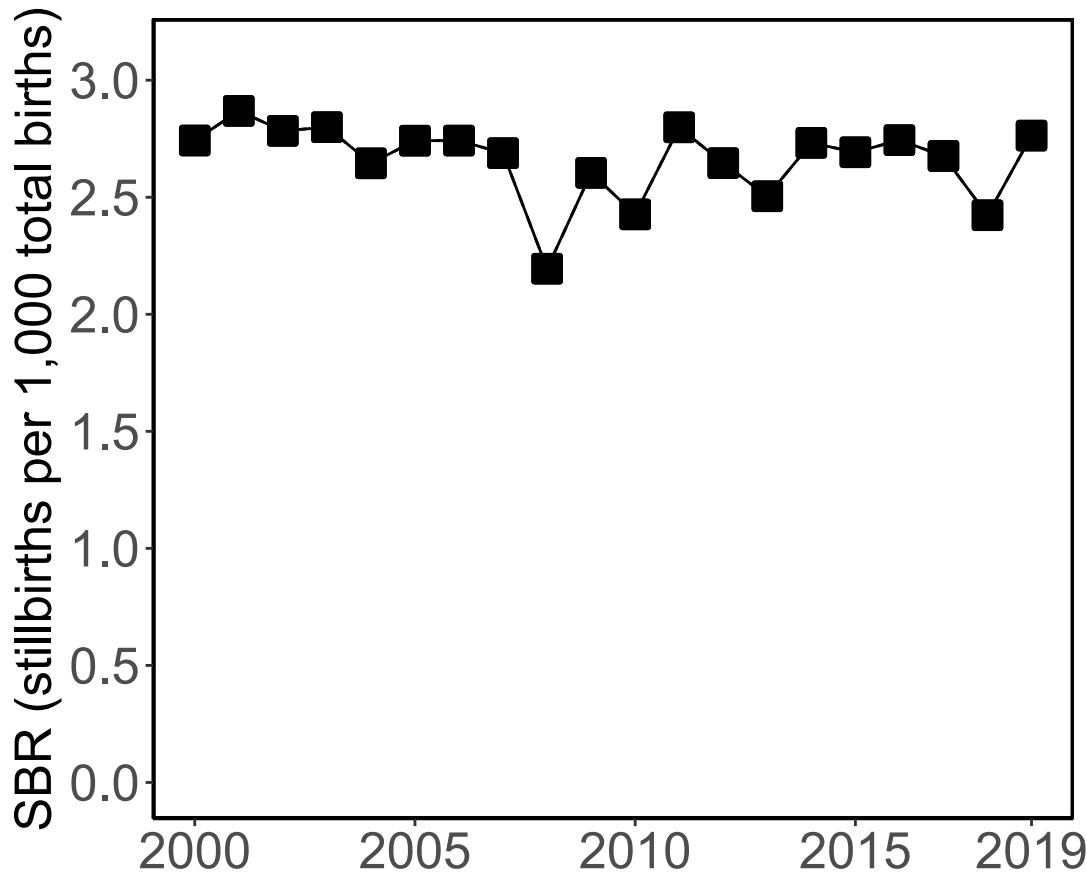

### '28+ Weeks of Gestation' Data (Incl. Adjusted Data)

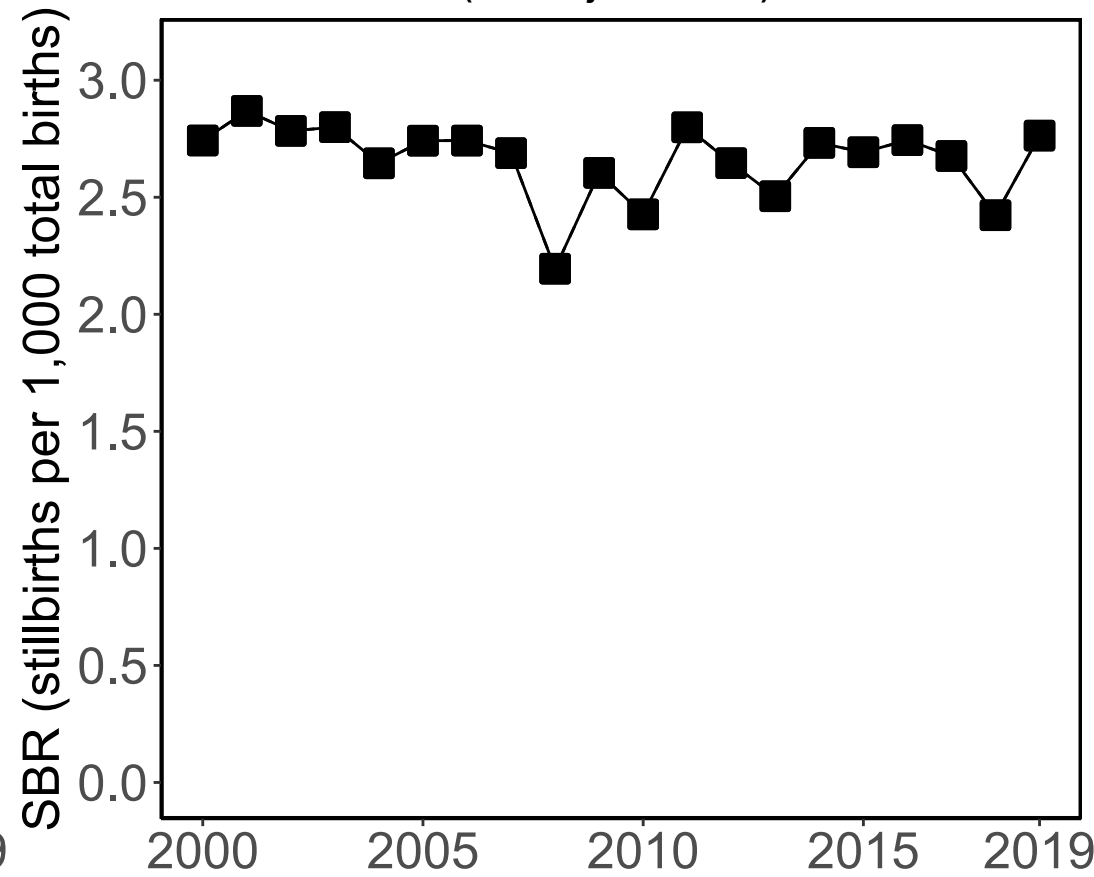

### Data Included in the Model

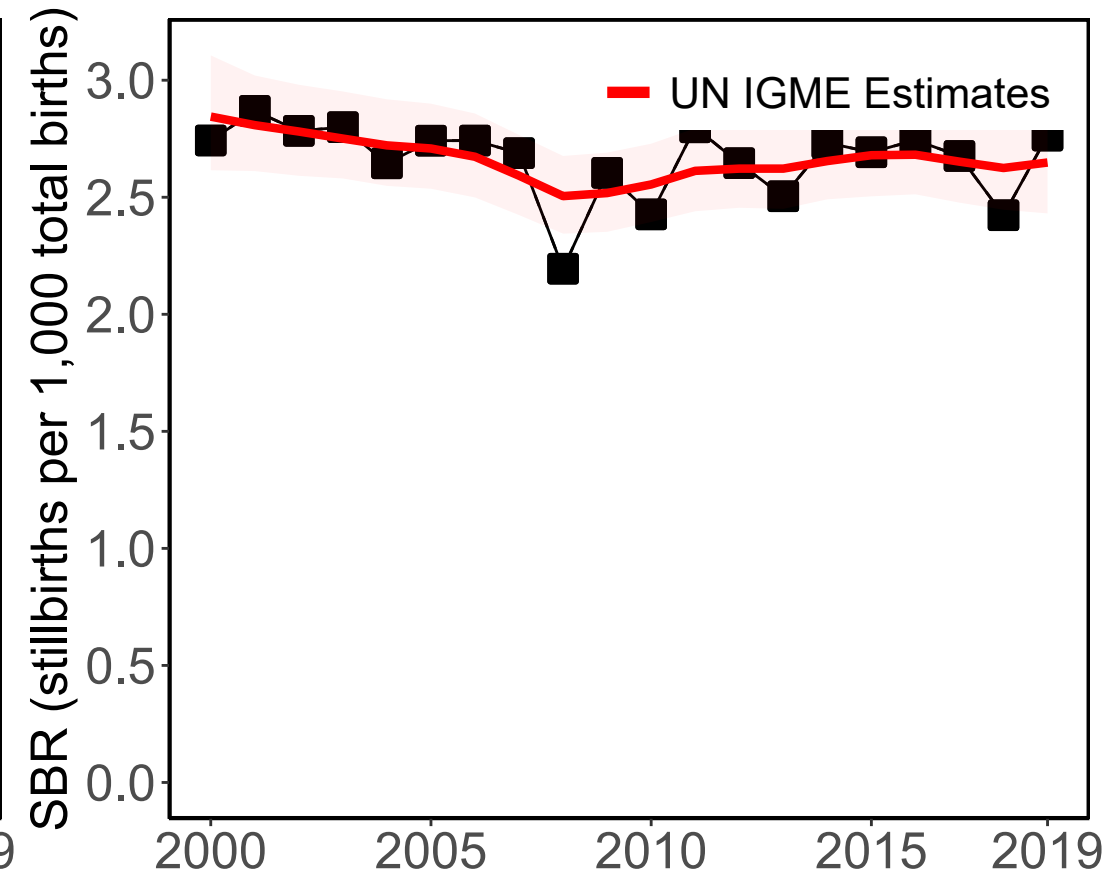

#### Source Types

Administrative

#### Data Sources

Vital Registration (28wks)



# Germany

Available Data

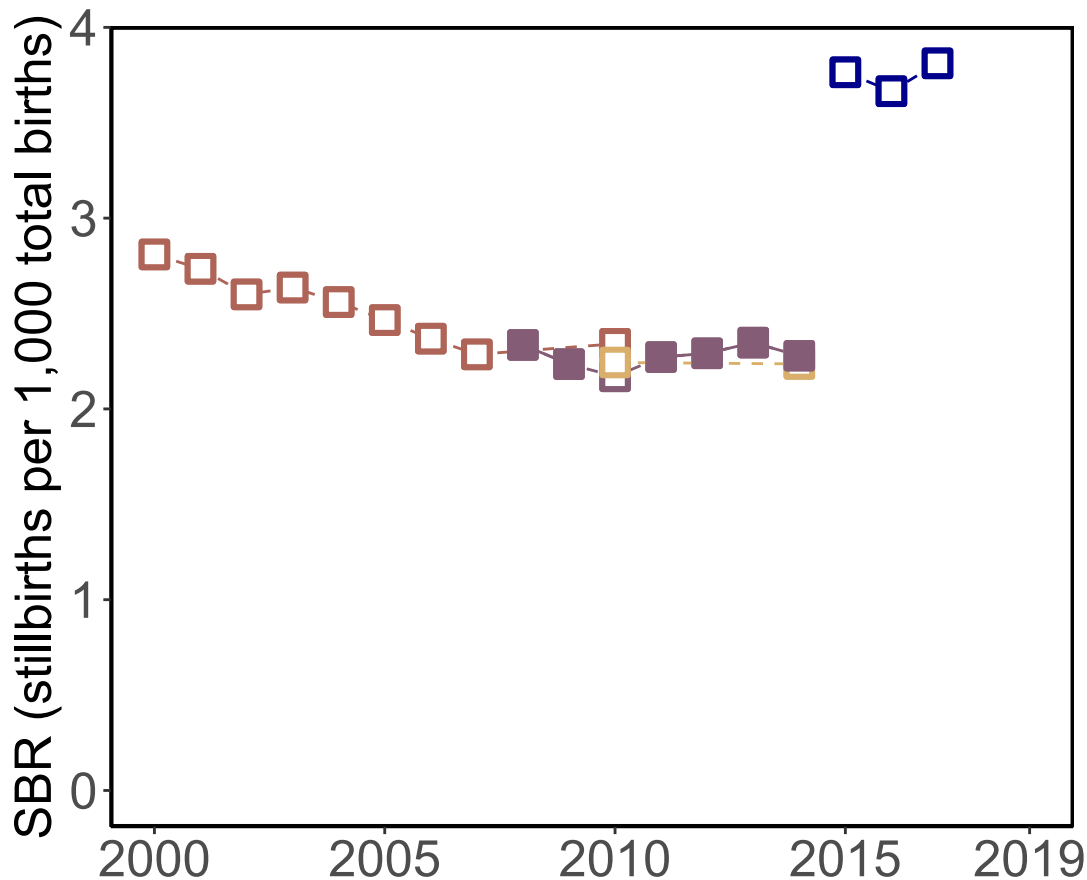

'28+ Weeks of Gestation' Data  
(Incl. Adjusted Data)

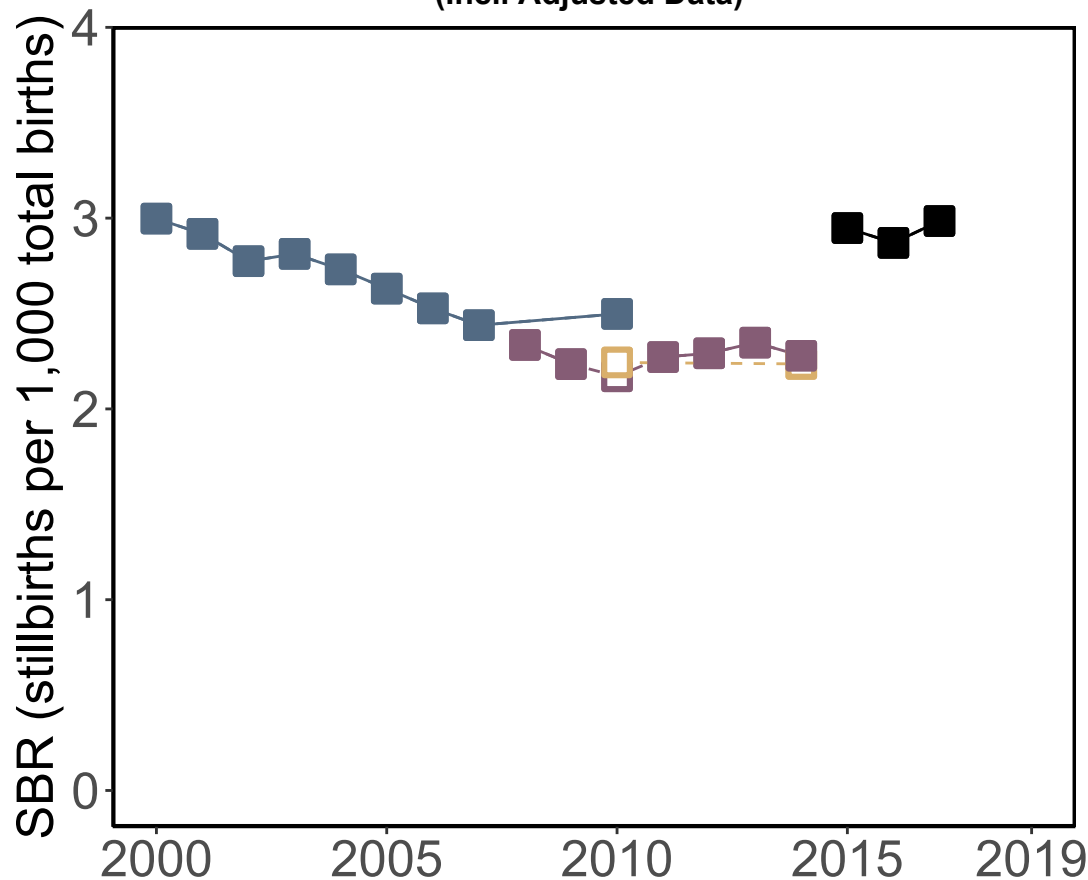

Data Included in the Model

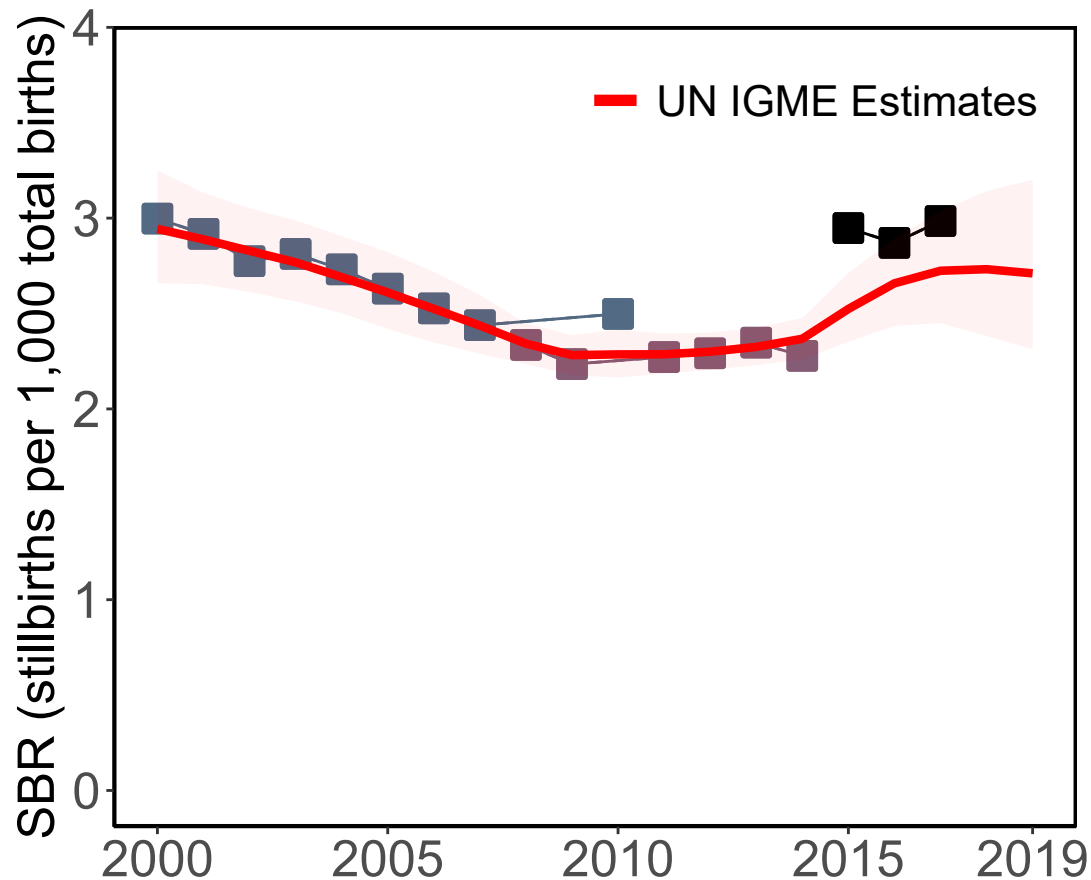

Source Types

Administrative

Data Sources

Vital Registration (28wks adj from 500g)

Vital Registration (500g)

Vital Registration (28wks)

Birth or Death Registry (28wks)

Birth or Death Registry (1000g)

Birth or Death Registry (28wks adj from 1000g)

# Djibouti

## Available Data

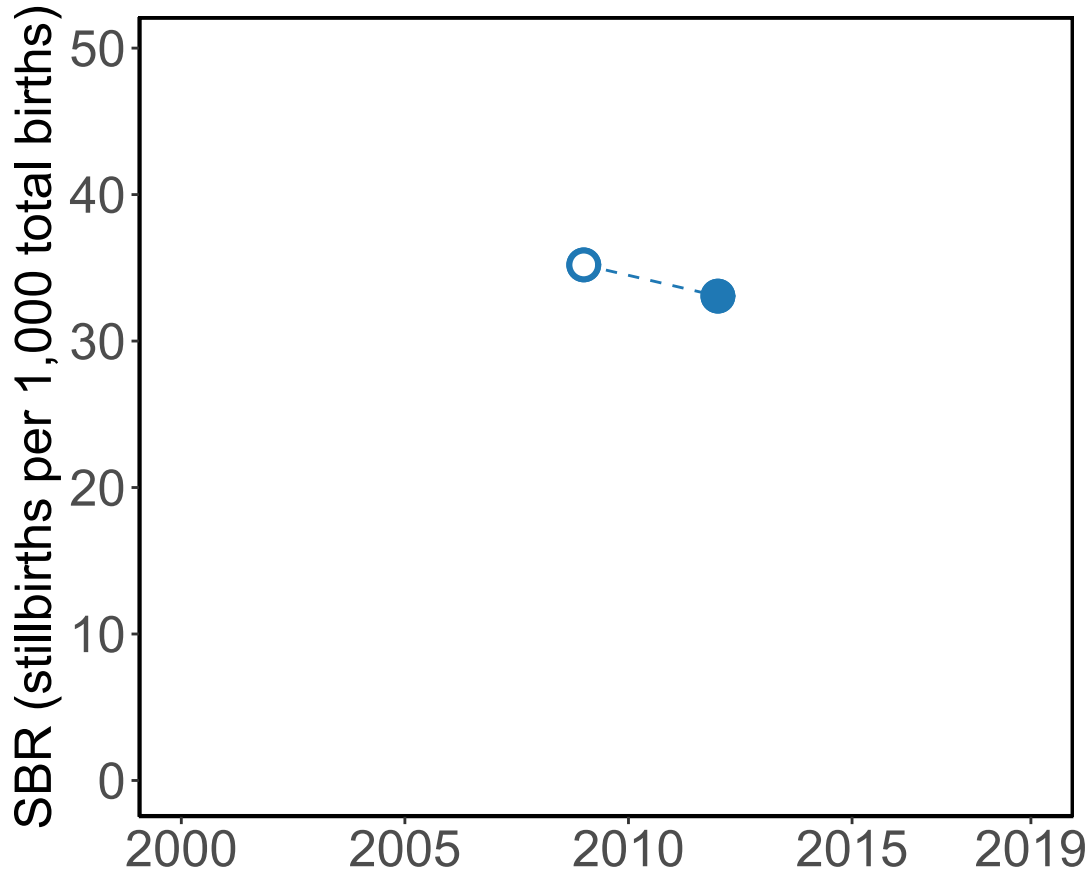

## '28+ Weeks of Gestation' Data (Incl. Adjusted Data)

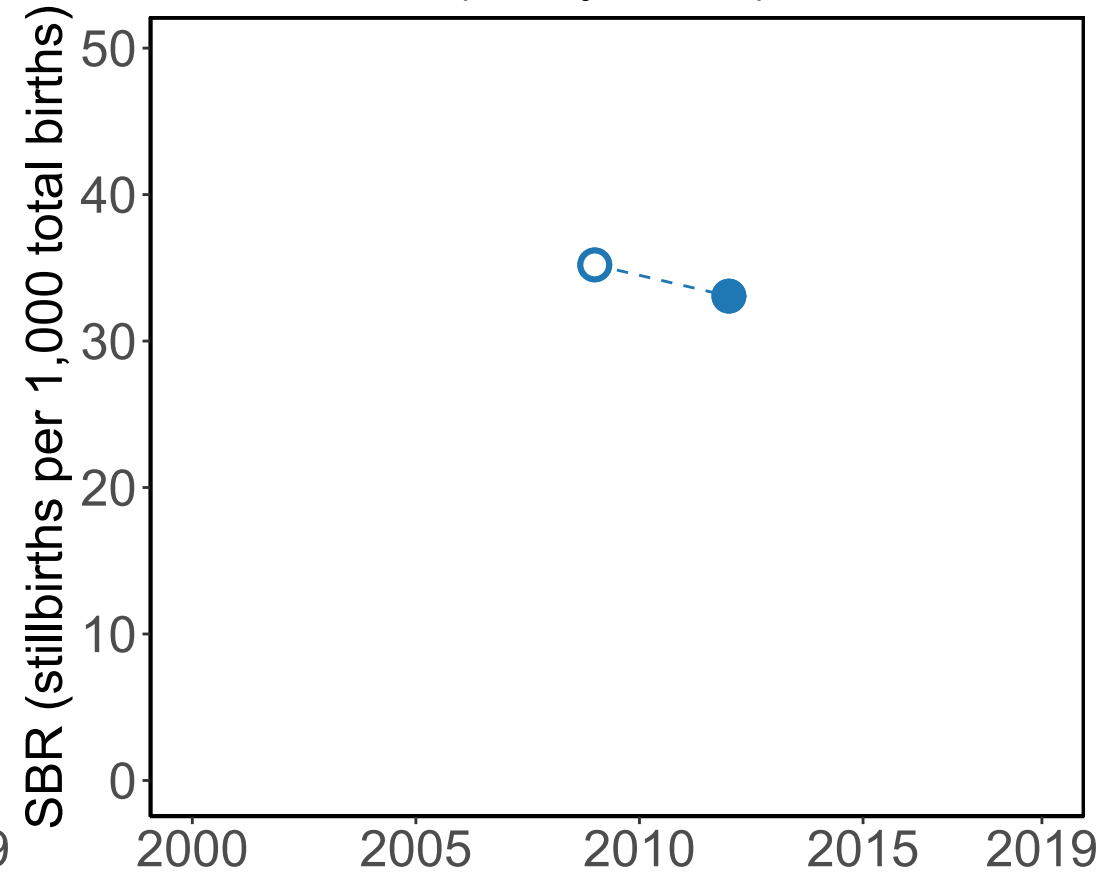

## Data Included in the Model

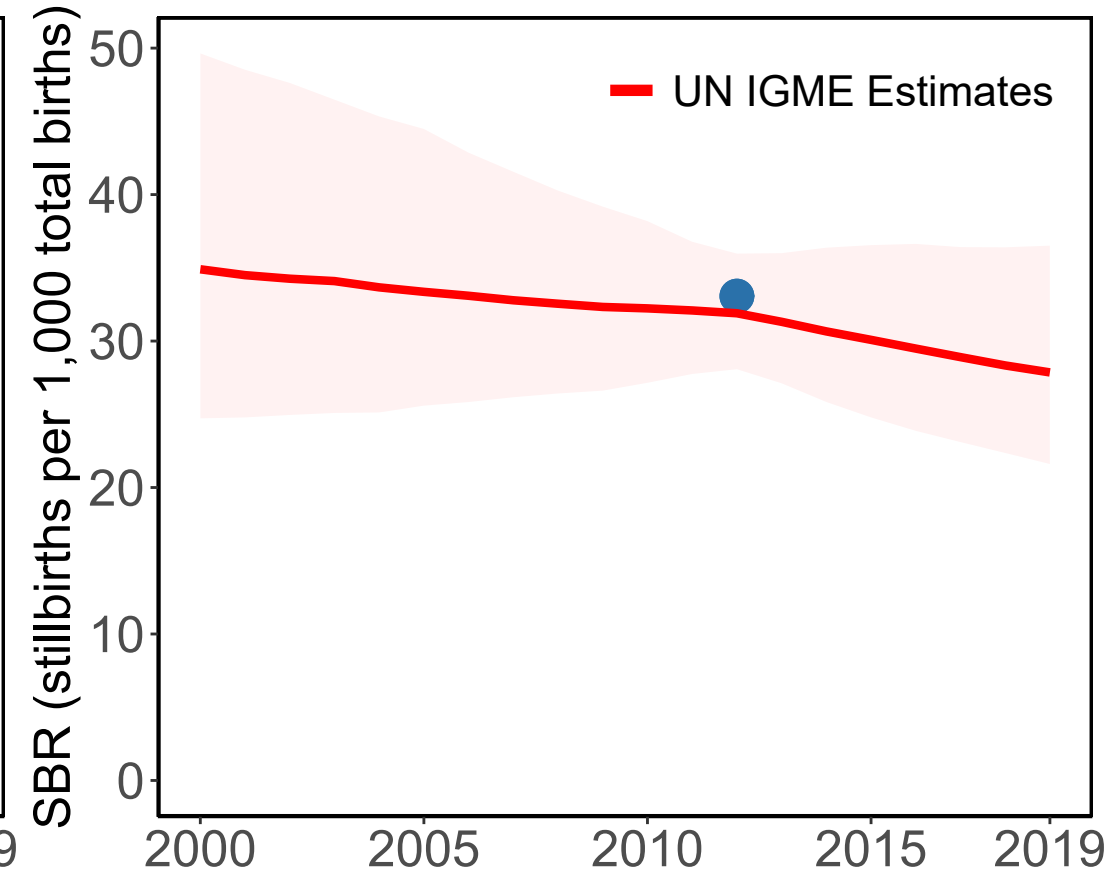

Source Types

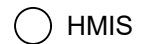

Data Sources

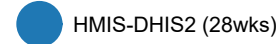

# Dominica

### Available Data

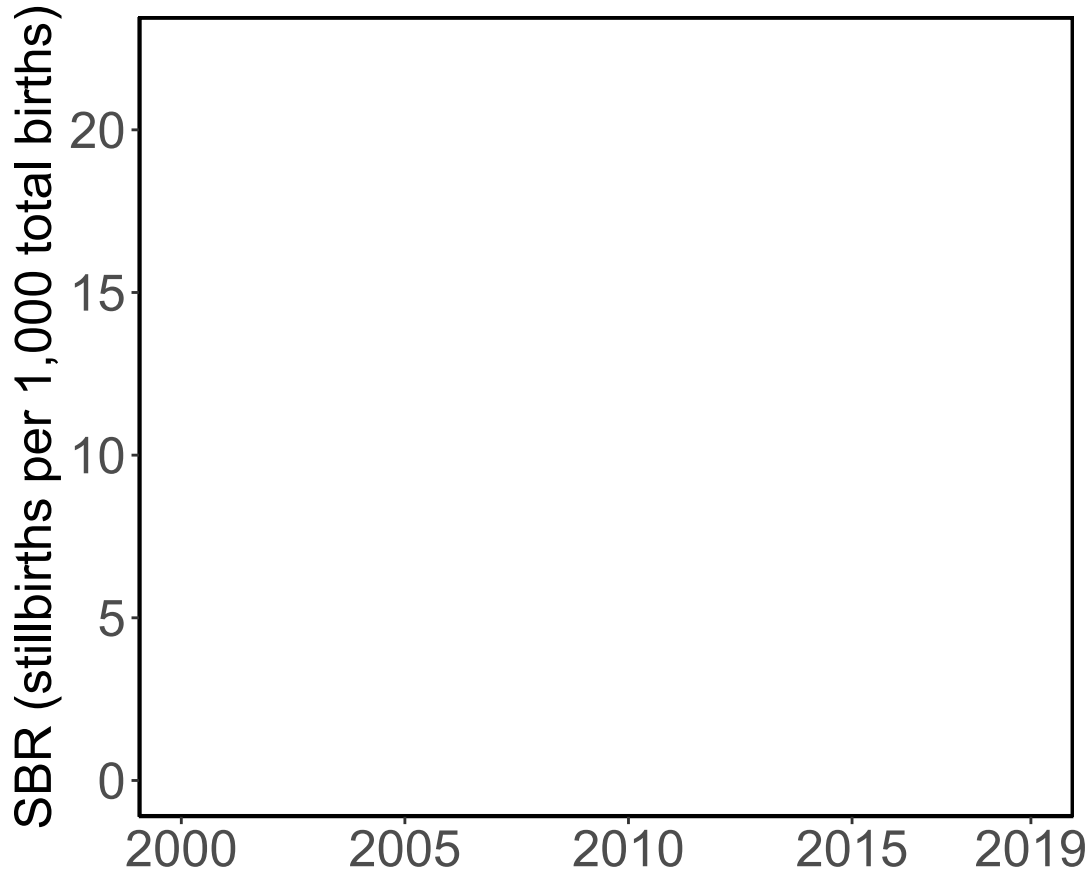

### '28+ Weeks of Gestation' Data (Incl. Adjusted Data)

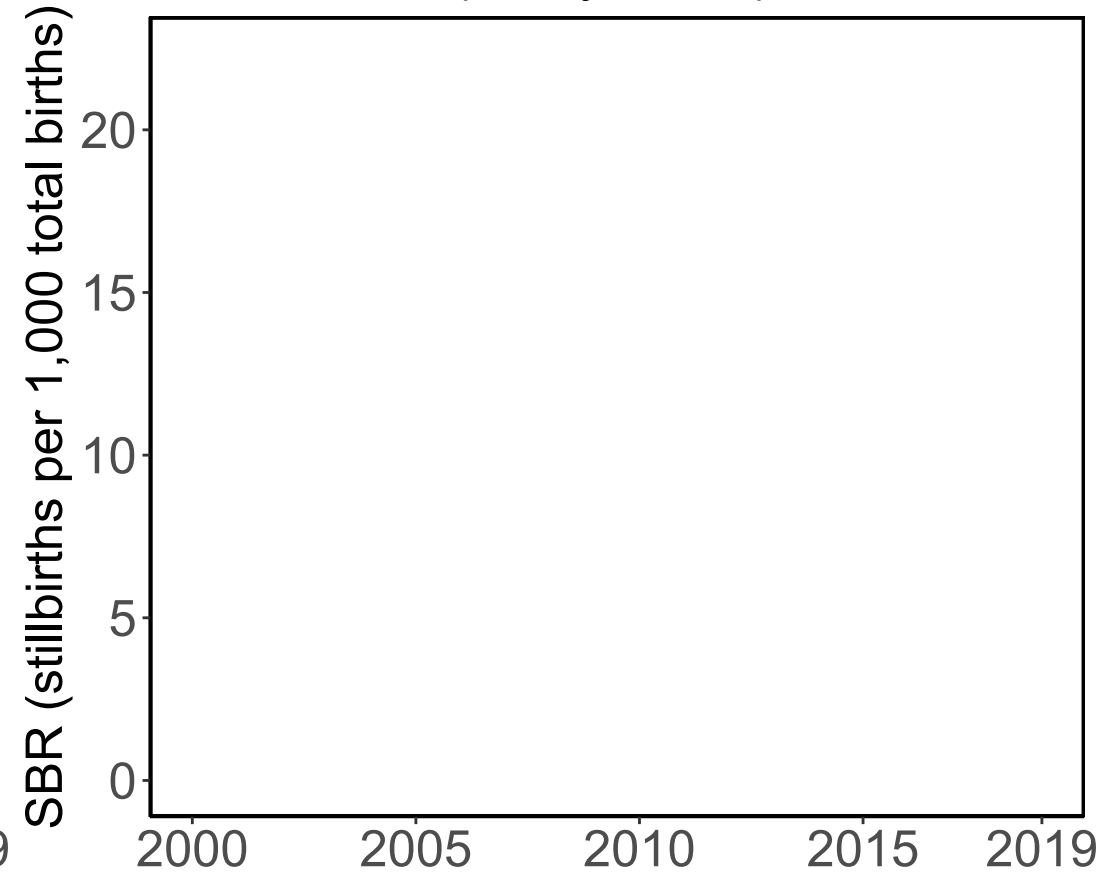

### Data Included in the Model

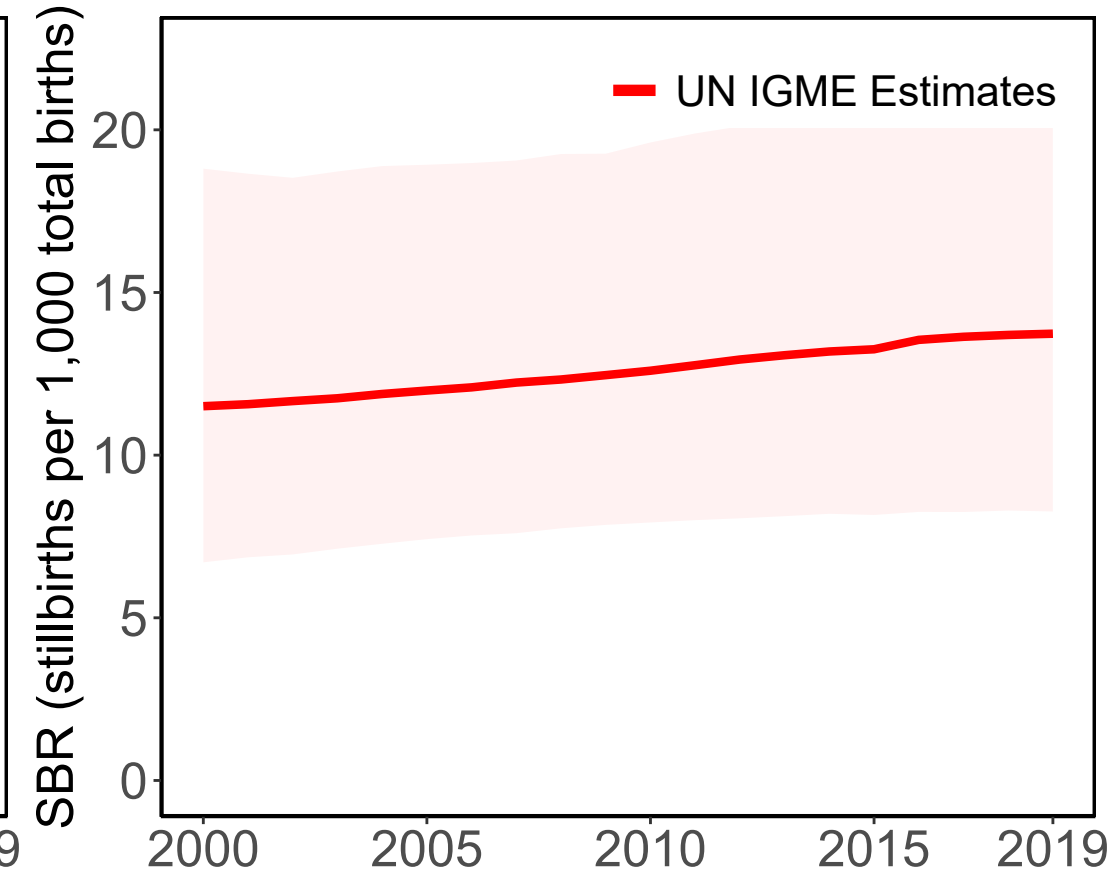

# Denmark

### Available Data

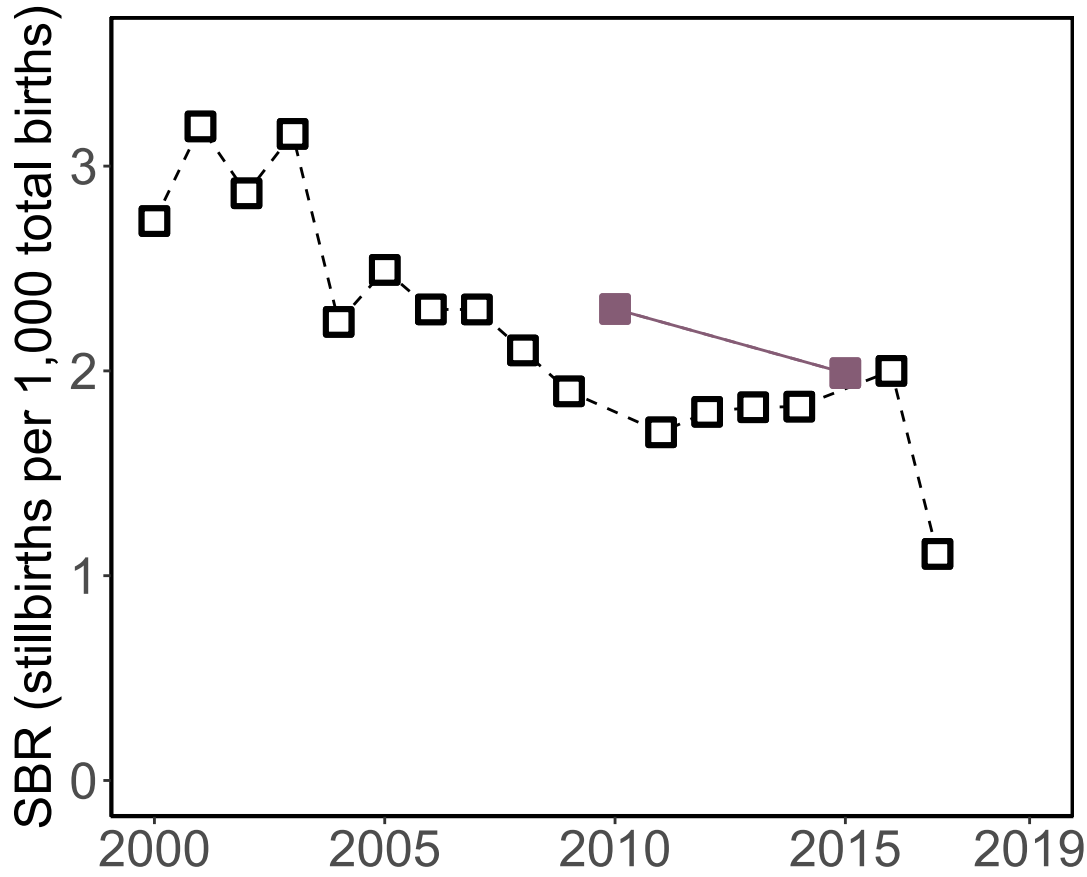

### '28+ Weeks of Gestation' Data (Incl. Adjusted Data)

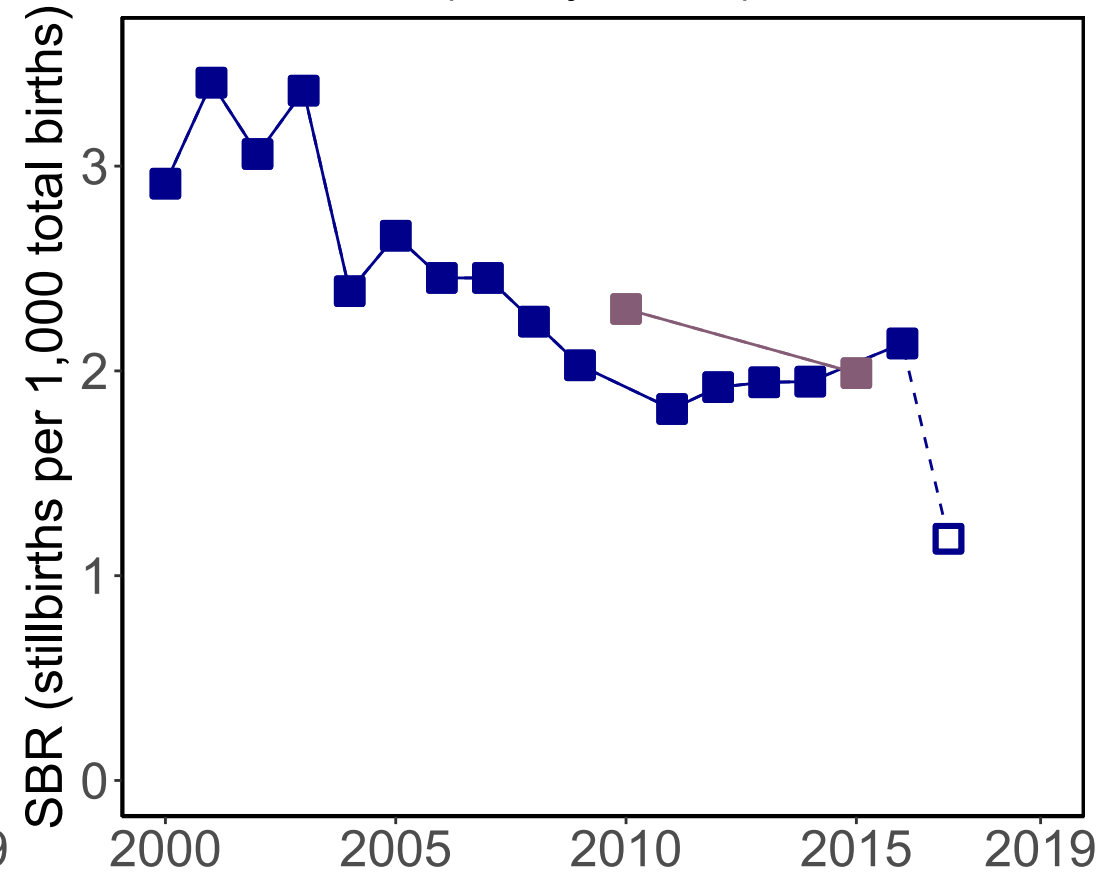

### Data Included in the Model

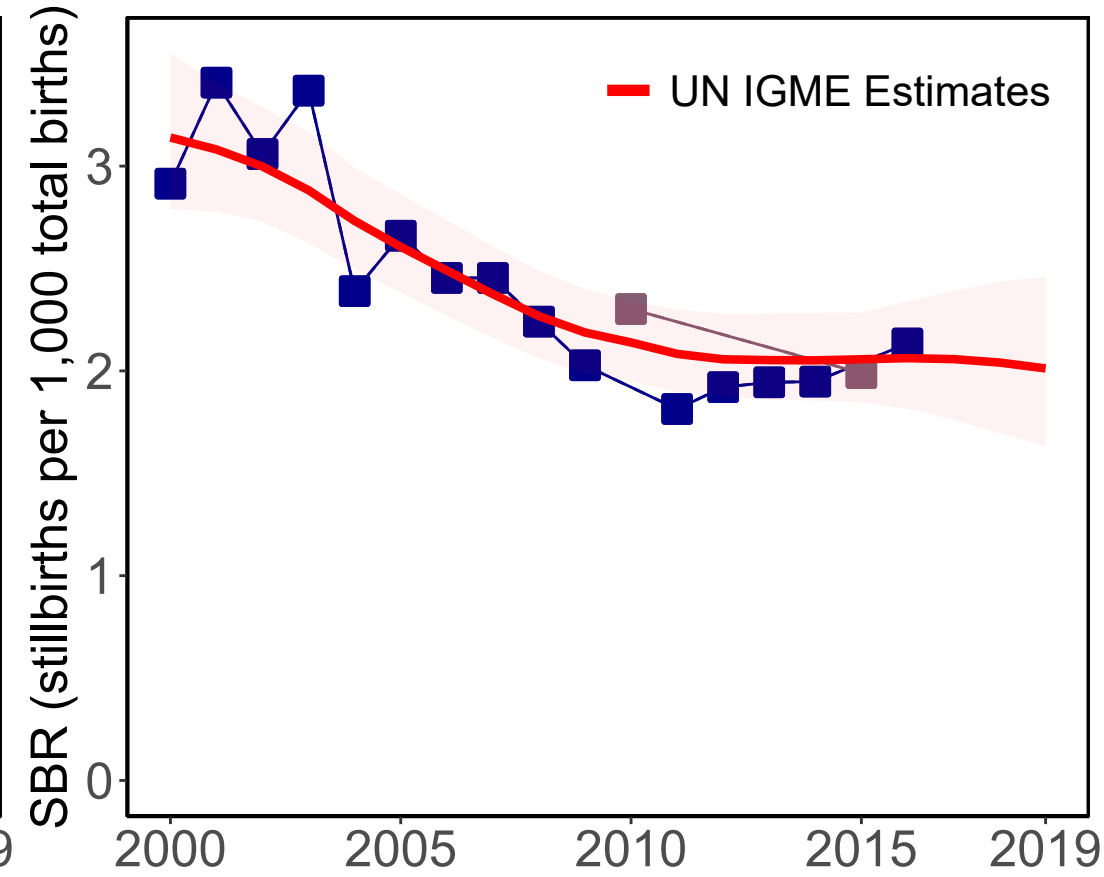

#### Source Types

□ Administrative

#### Data Sources

■ Vital Registration (28wks)

□ Vital Registration (1000g)

■ Vital Registration (28wks adj from 1000g)

# Dominican Republic

### Available Data

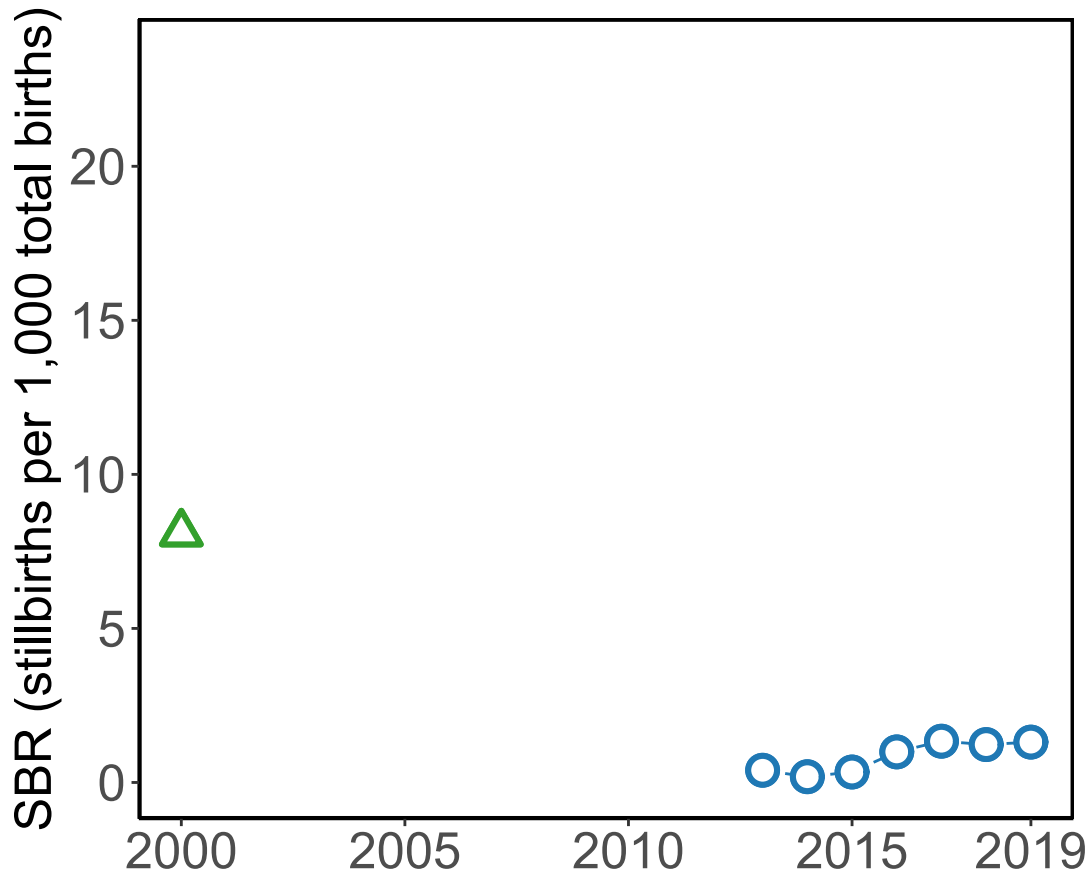

### '28+ Weeks of Gestation' Data (Incl. Adjusted Data)

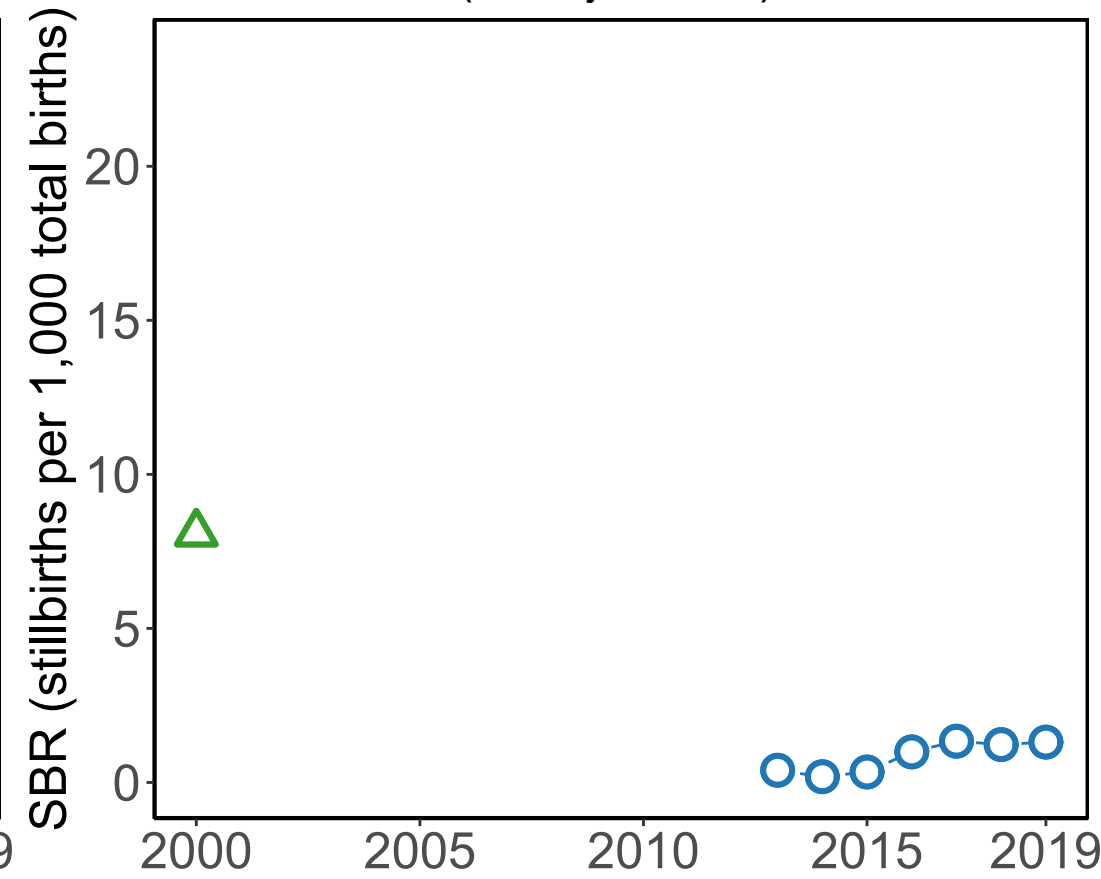

### Data Included in the Model

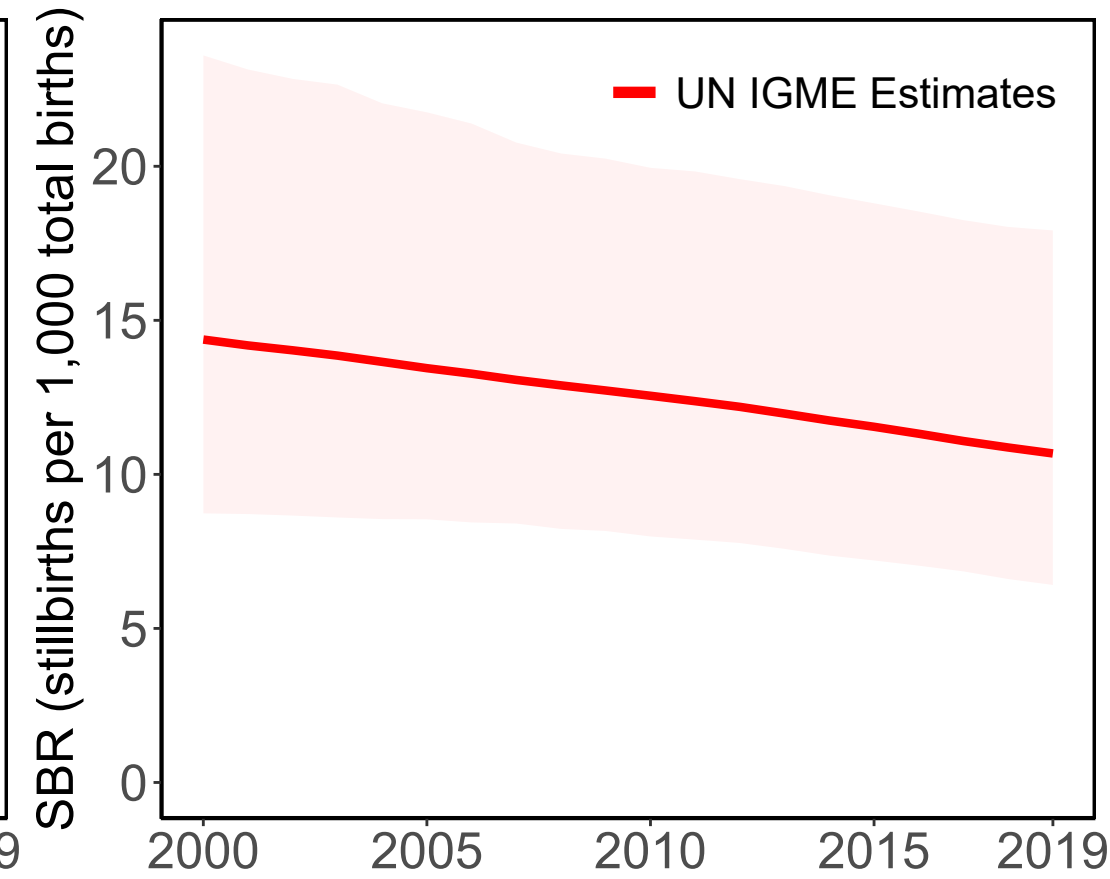

#### Source Types

○ HMIS   △ Survey

#### Data Sources

○ HMIS-DHIS2 (28wks)

△ Encuesta Demográfica y de Salud 2002 (DHS) (RC) (28wks)

# Algeria

### Available Data

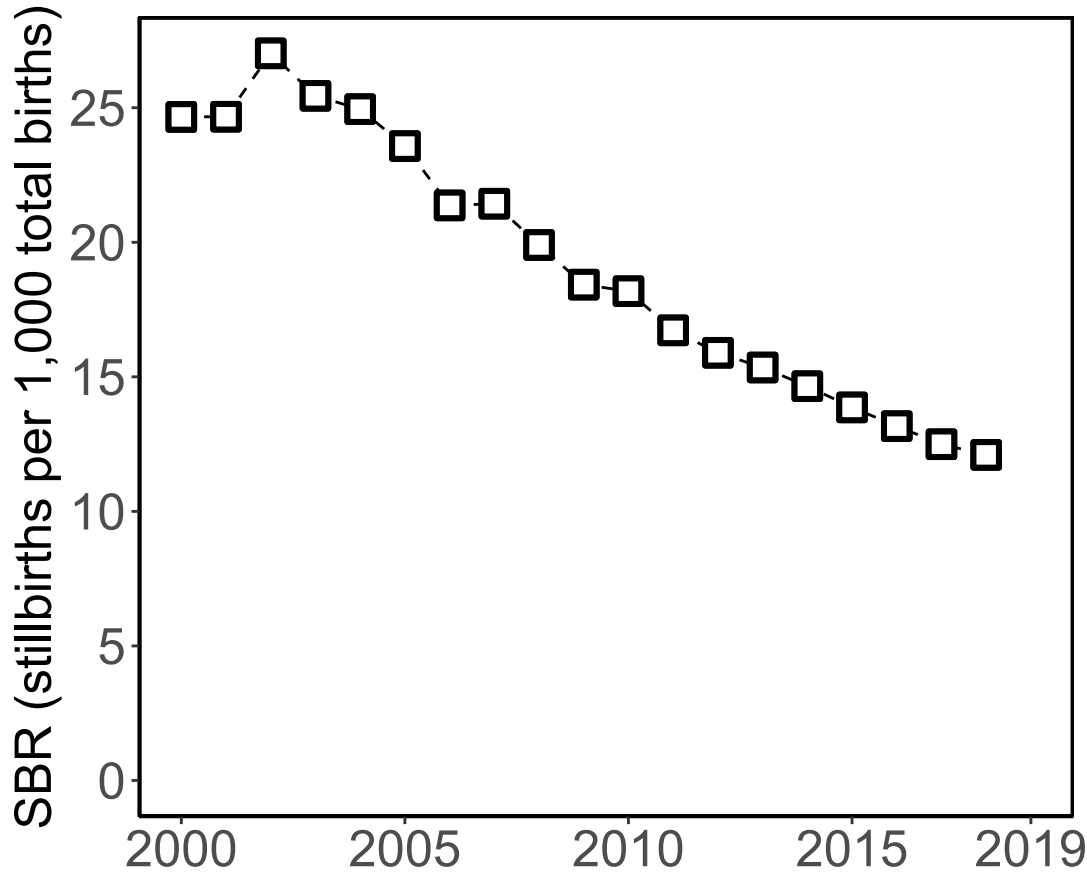

### '28+ Weeks of Gestation' Data (Incl. Adjusted Data)

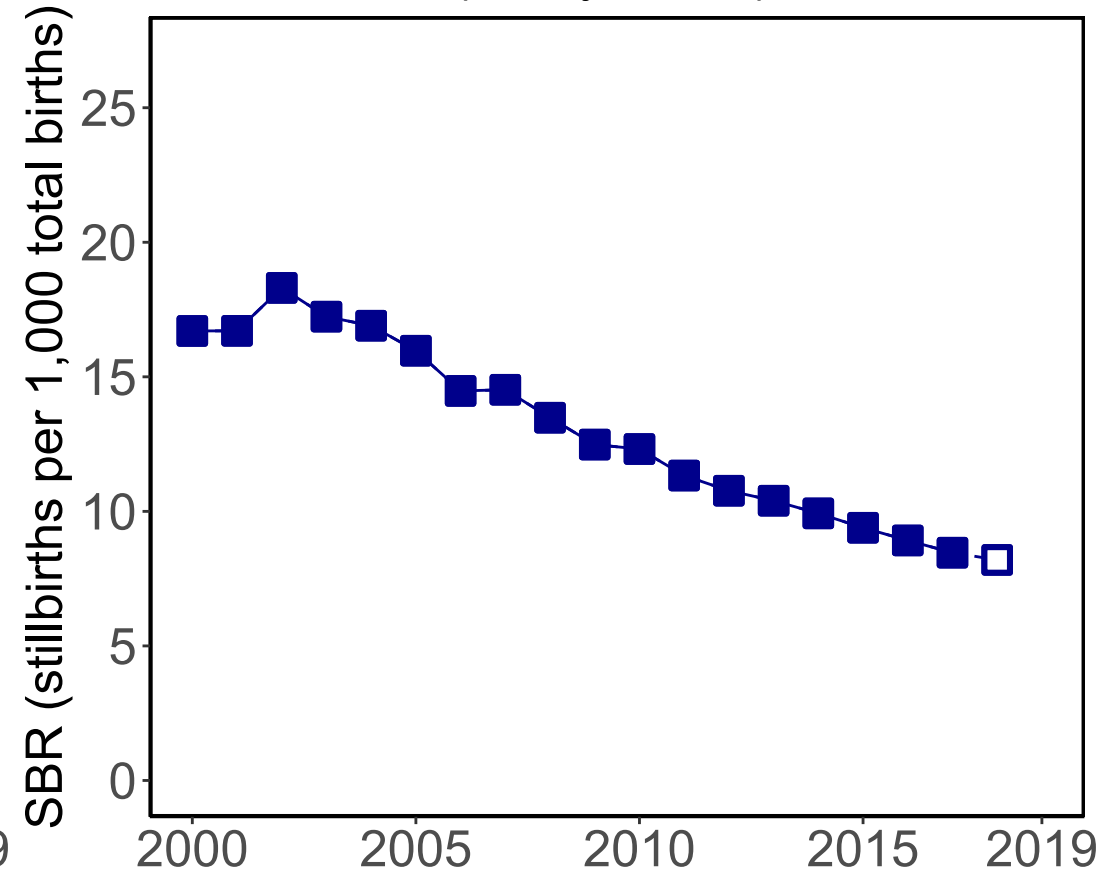

### Data Included in the Model

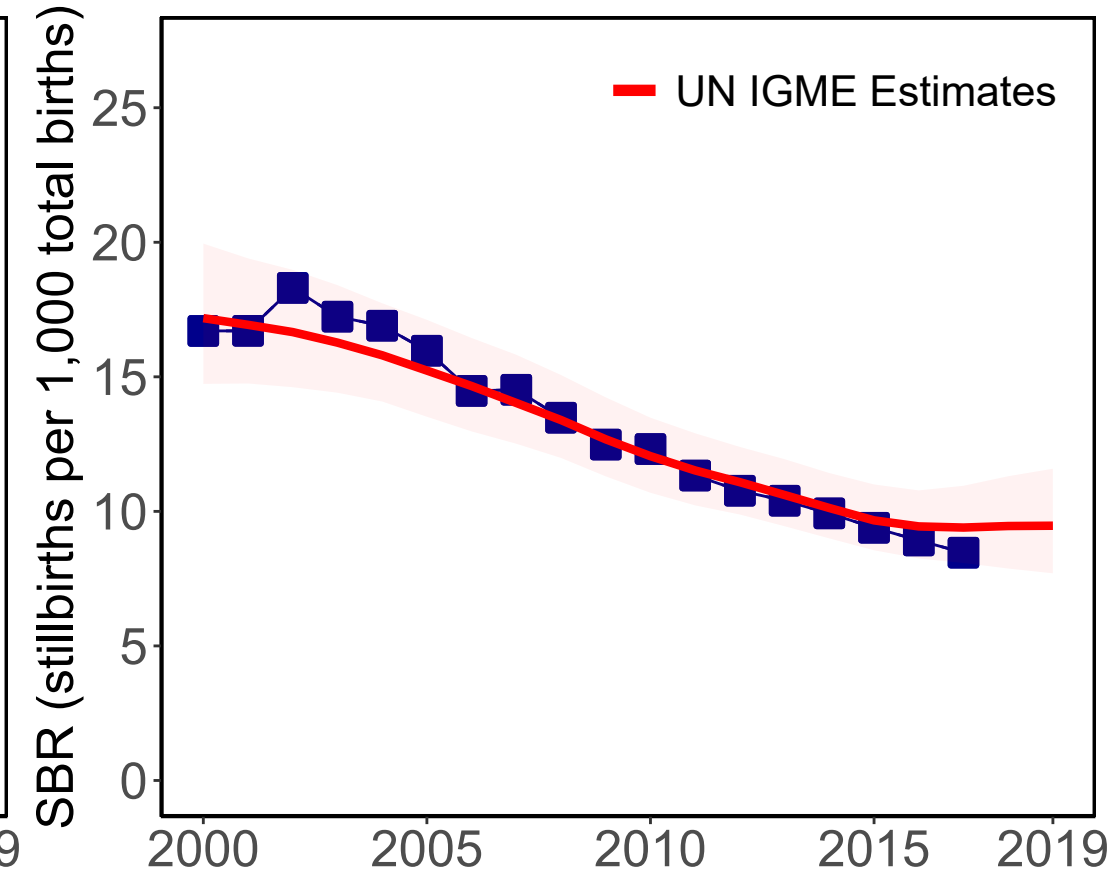

#### Source Types

Administrative

#### Data Sources

Vital Registration (22wks)

Vital Registration (28wks adj from 22wks)

# Ecuador

Available Data

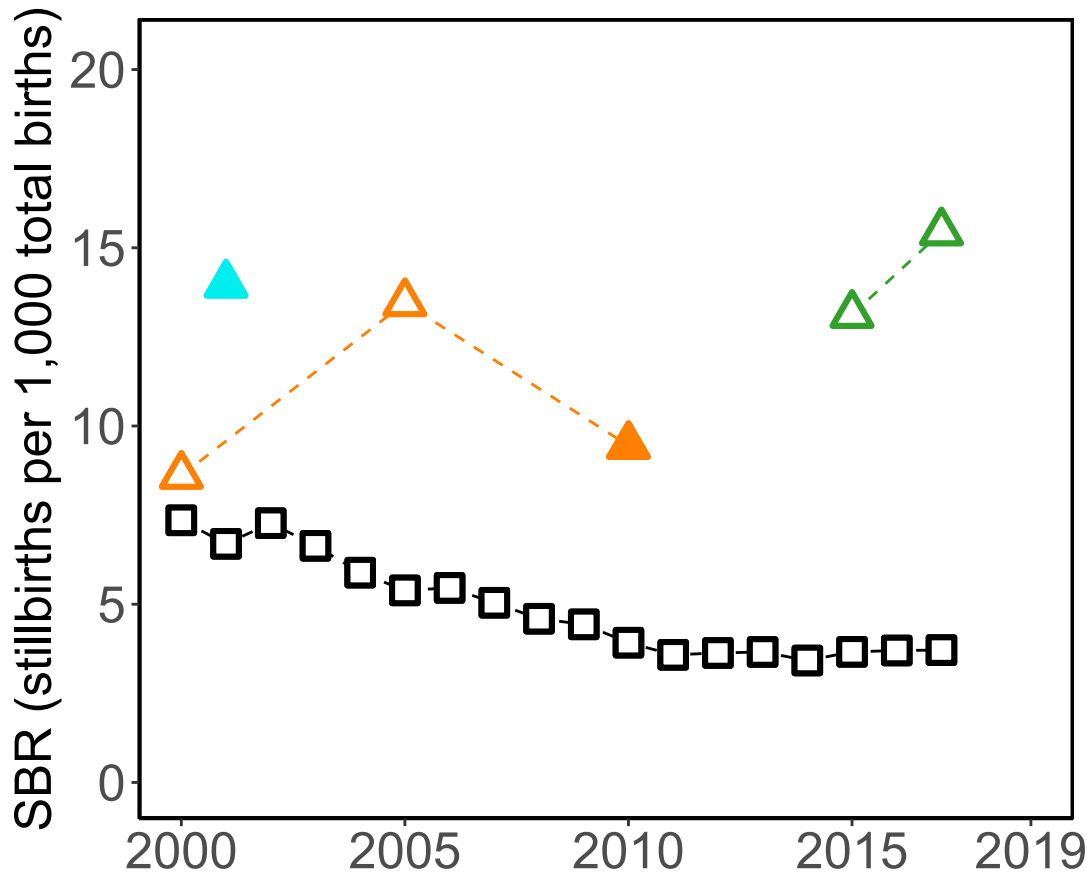

'28+ Weeks of Gestation' Data  
(Incl. Adjusted Data)

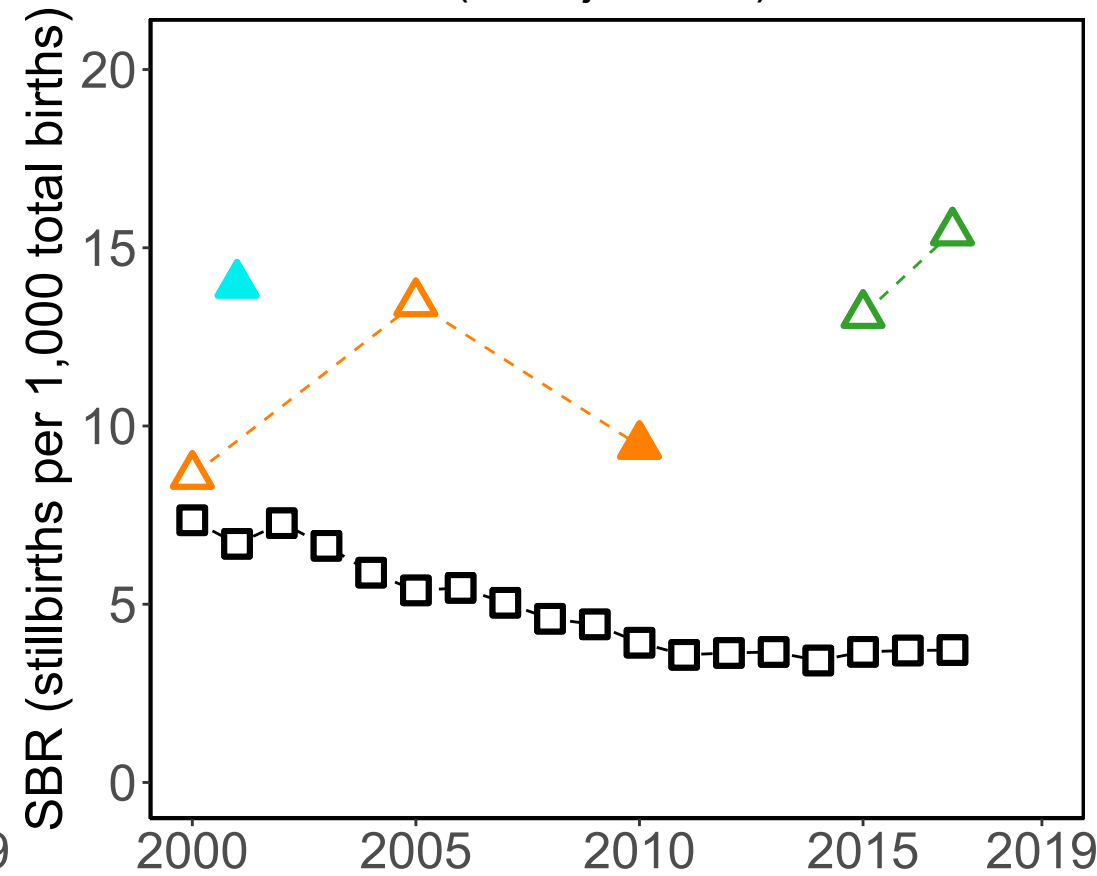

Data Included in the Model

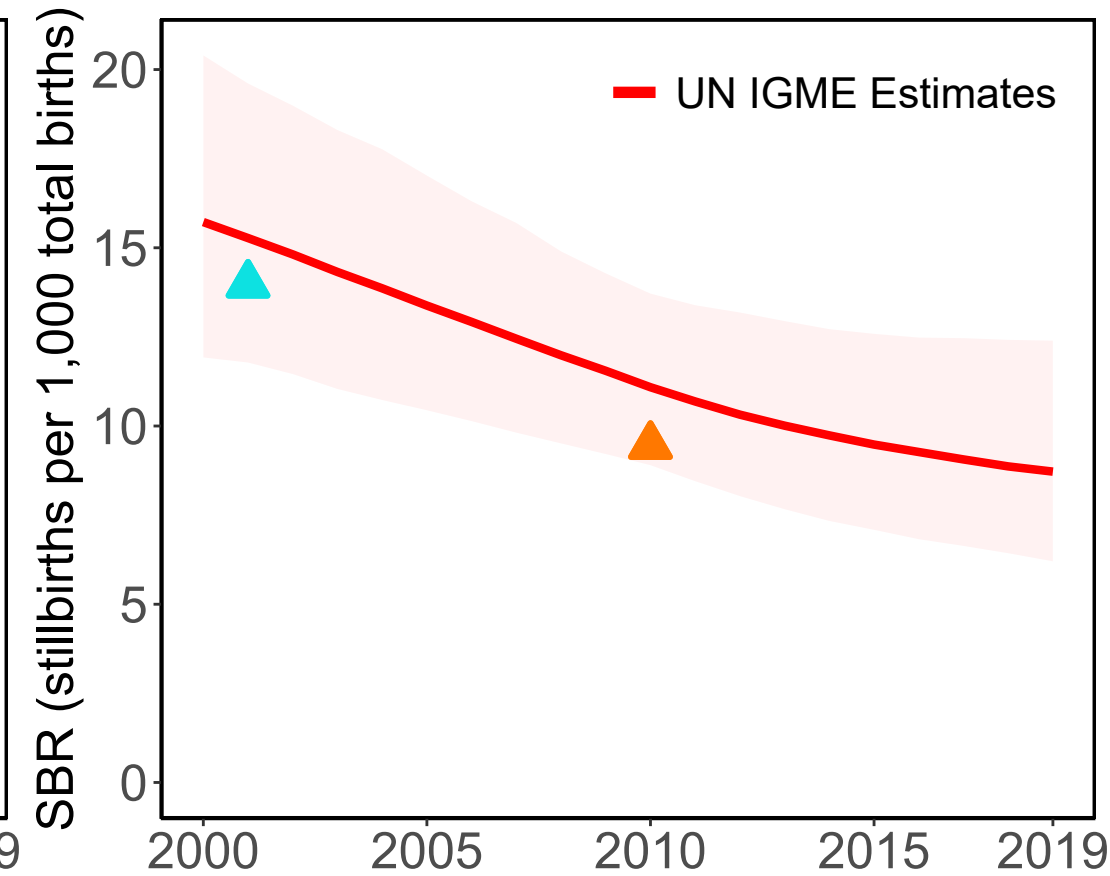

Source Types

□ Administrative    △ Survey

Data Sources

□ Vital Registration (28wks)

△ Encuesta Nacional de Salud y Nutrición 2018 (Other) (PH) (28wks)

▲ Encuesta Nacional de Salud y Nutrición 2012 (Other) (PH) (28wks)

▲ Encuesta Demográfica y de Salud Materna e Infantil 2004 (RHS) (PH) (28wks)

# Egypt

Available Data

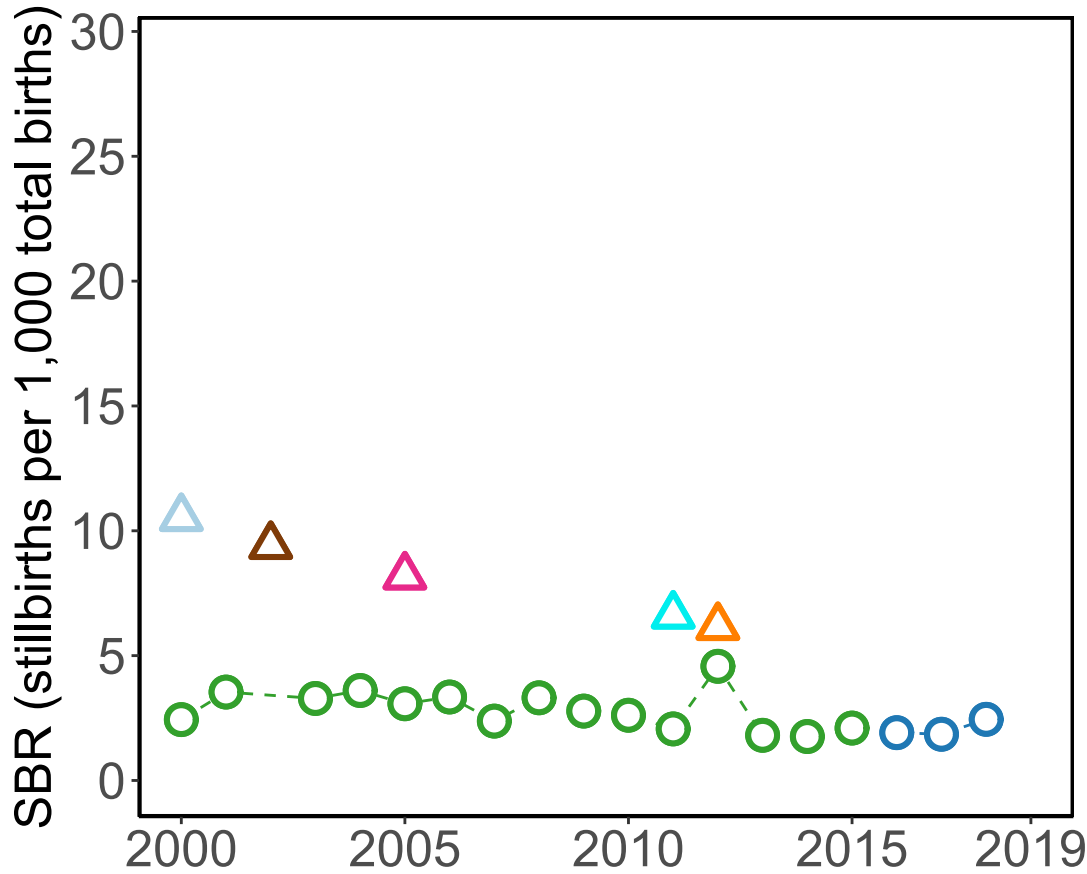

'28+ Weeks of Gestation' Data  
(Incl. Adjusted Data)

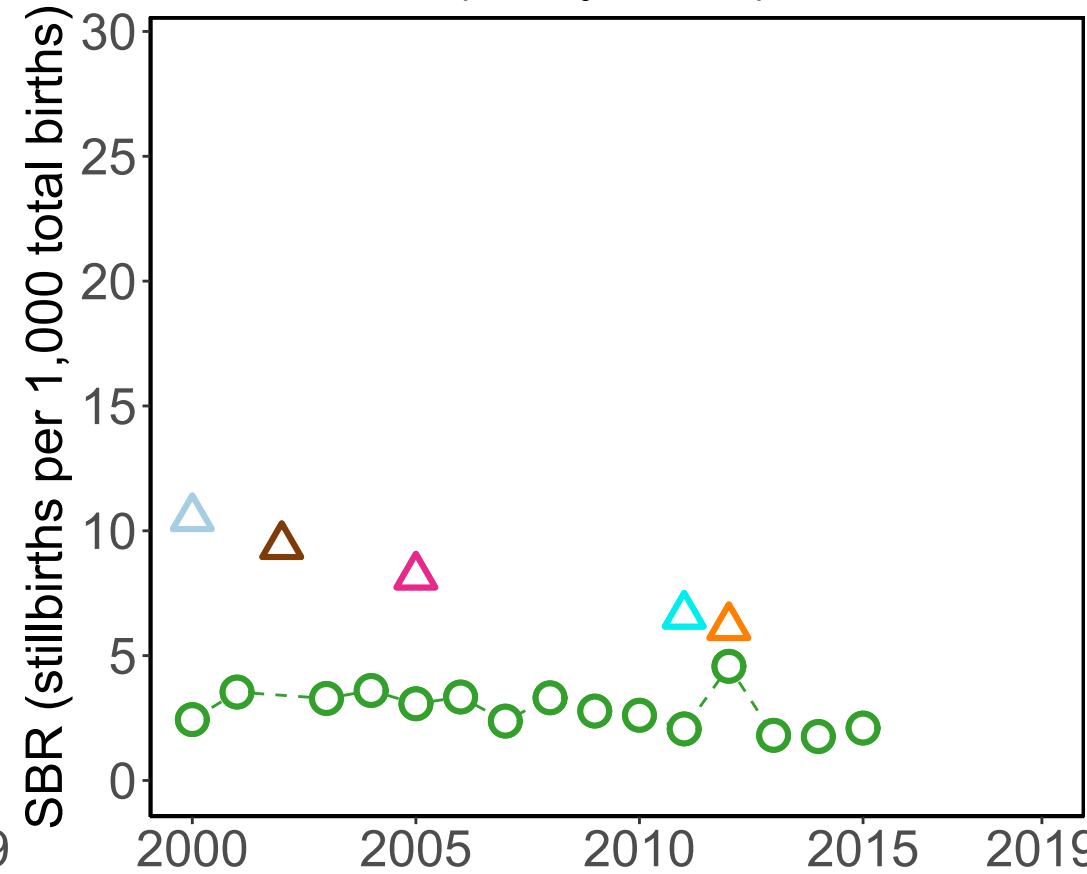

Data Included in the Model

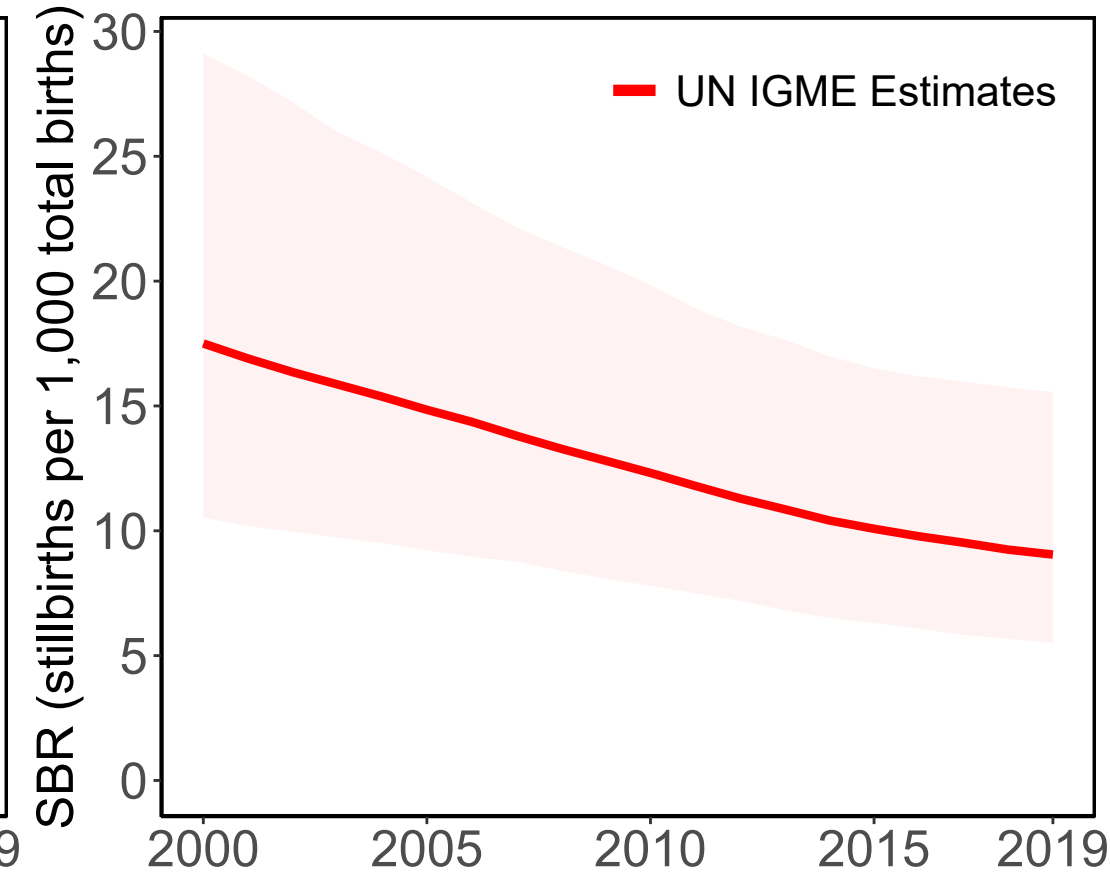

Source Types

○ HMIS △ Survey

Data Sources

○ HMIS-DHIS2 (1000g)

○ HMIS-DHIS2 (28wks)

△ Demographic and Health Survey 2015 (DHS) (BH/SQ) (28wks)

△ Demographic and Health Survey 2014 (DHS) (RC) (28wks)

△ Demographic and Health Survey 2008 (DHS) (RC) (28wks)

△ Demographic and Health Survey 2005 (DHS) (RC) (28wks)

△ Demographic and Health Survey 2003 (DHS) (RC) (28wks)

— UN IGME Estimates



# Eritrea

### Available Data

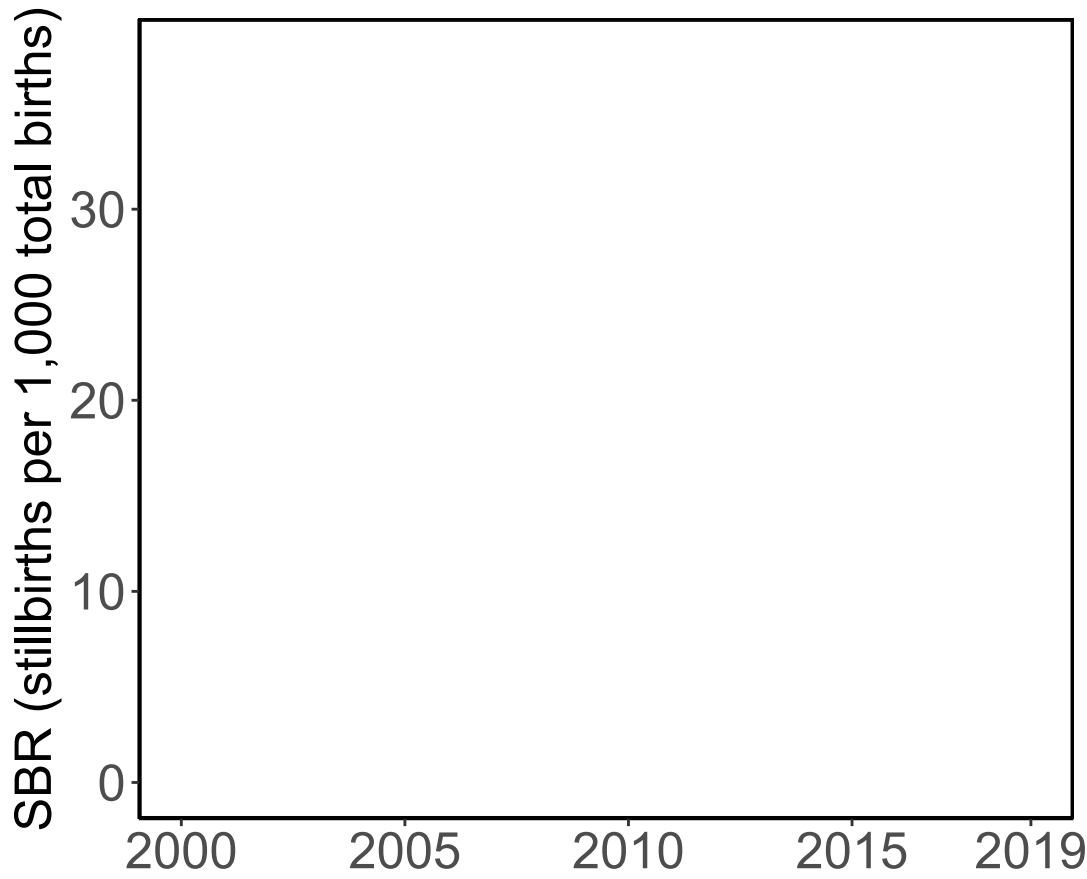

### '28+ Weeks of Gestation' Data (Incl. Adjusted Data)

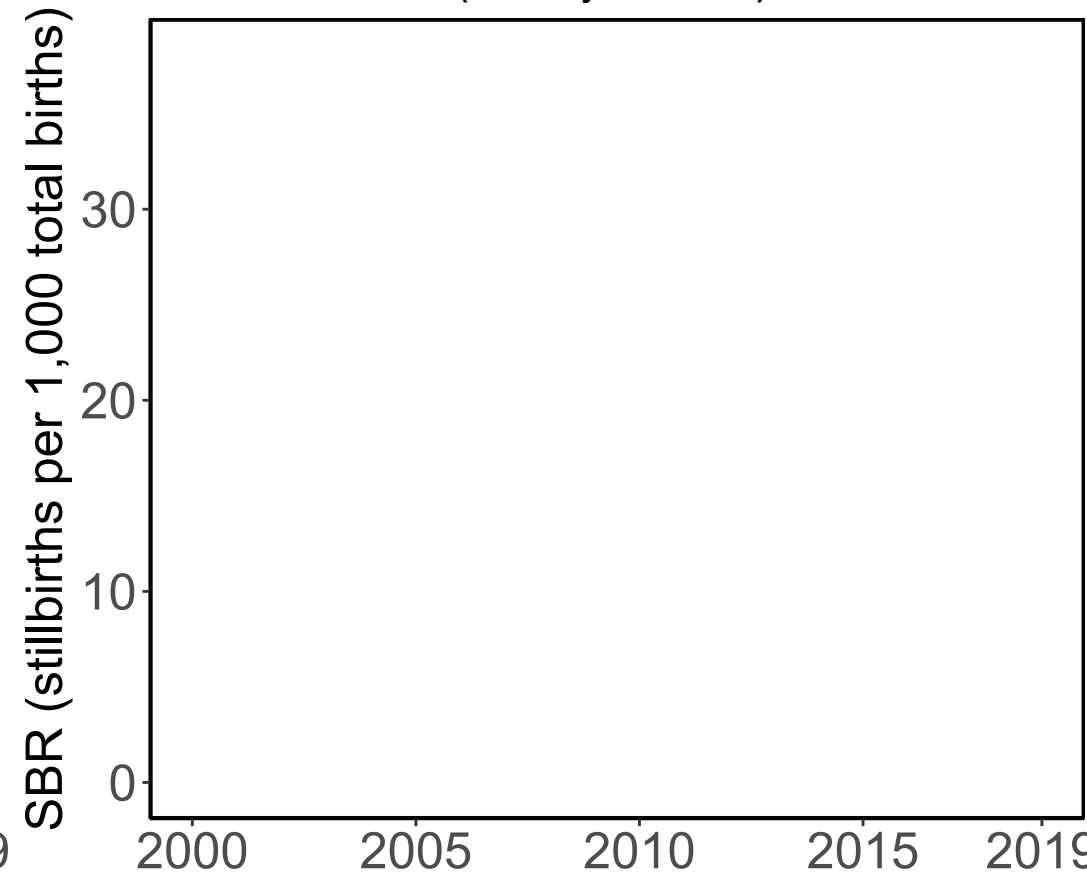

### Data Included in the Model

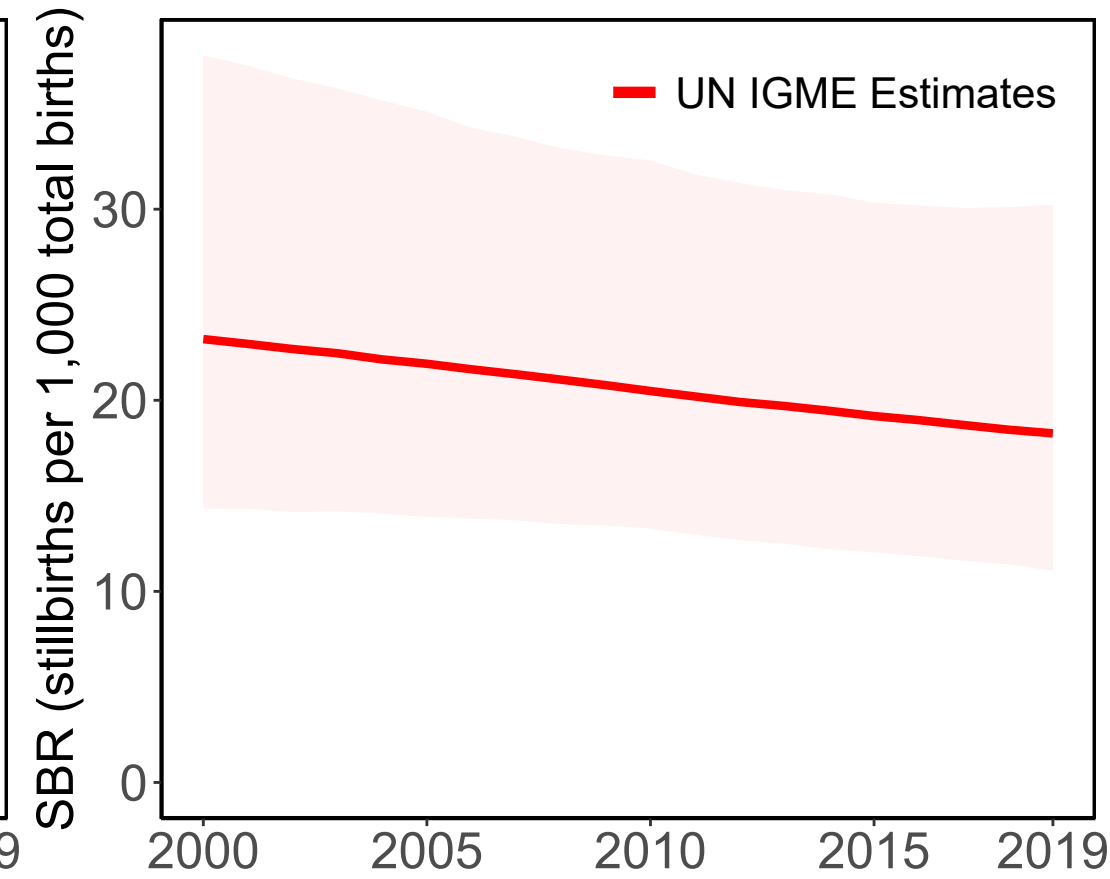

# Spain

### Available Data

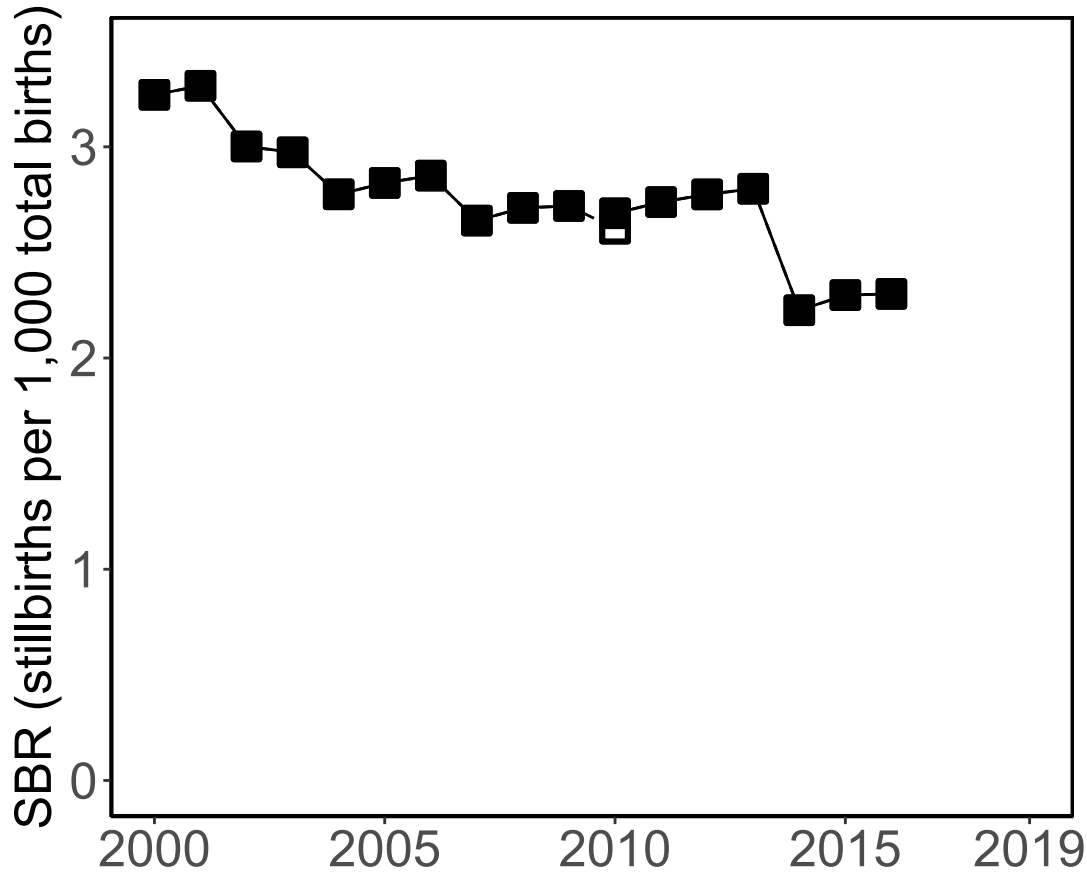

### '28+ Weeks of Gestation' Data (Incl. Adjusted Data)

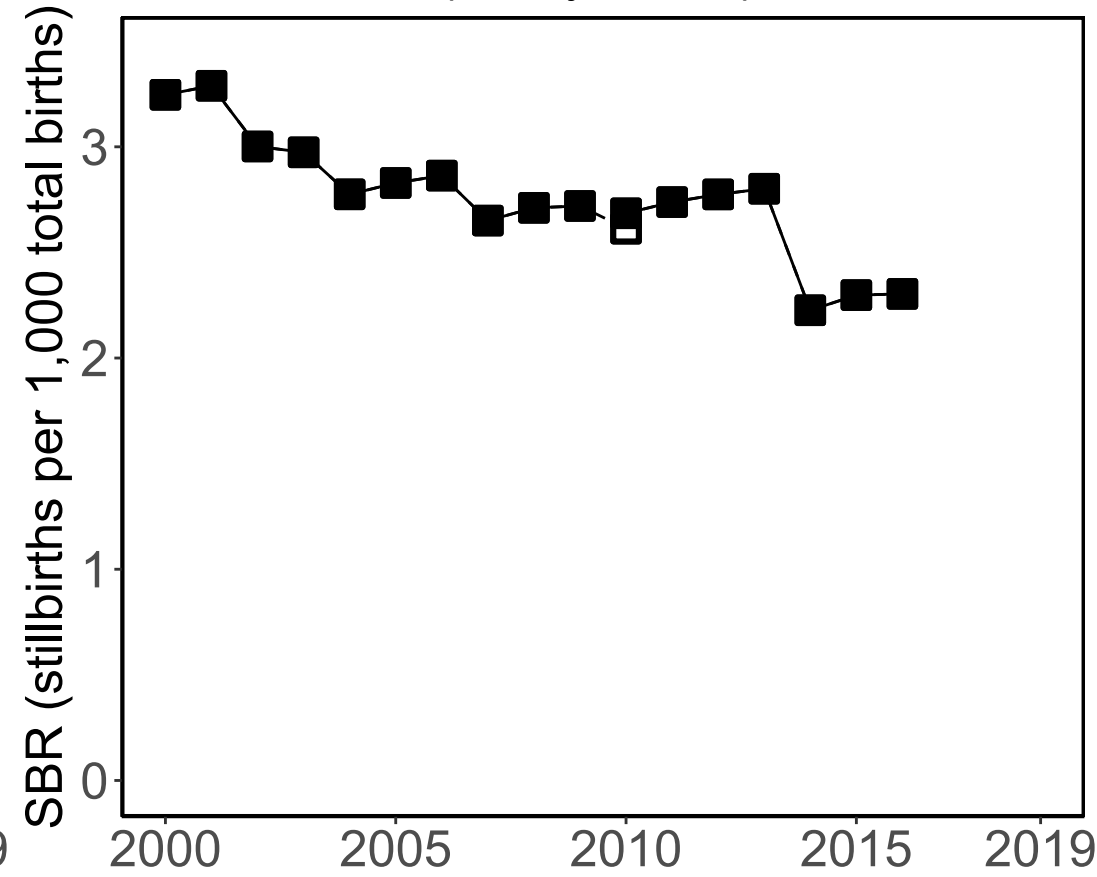

### Data Included in the Model

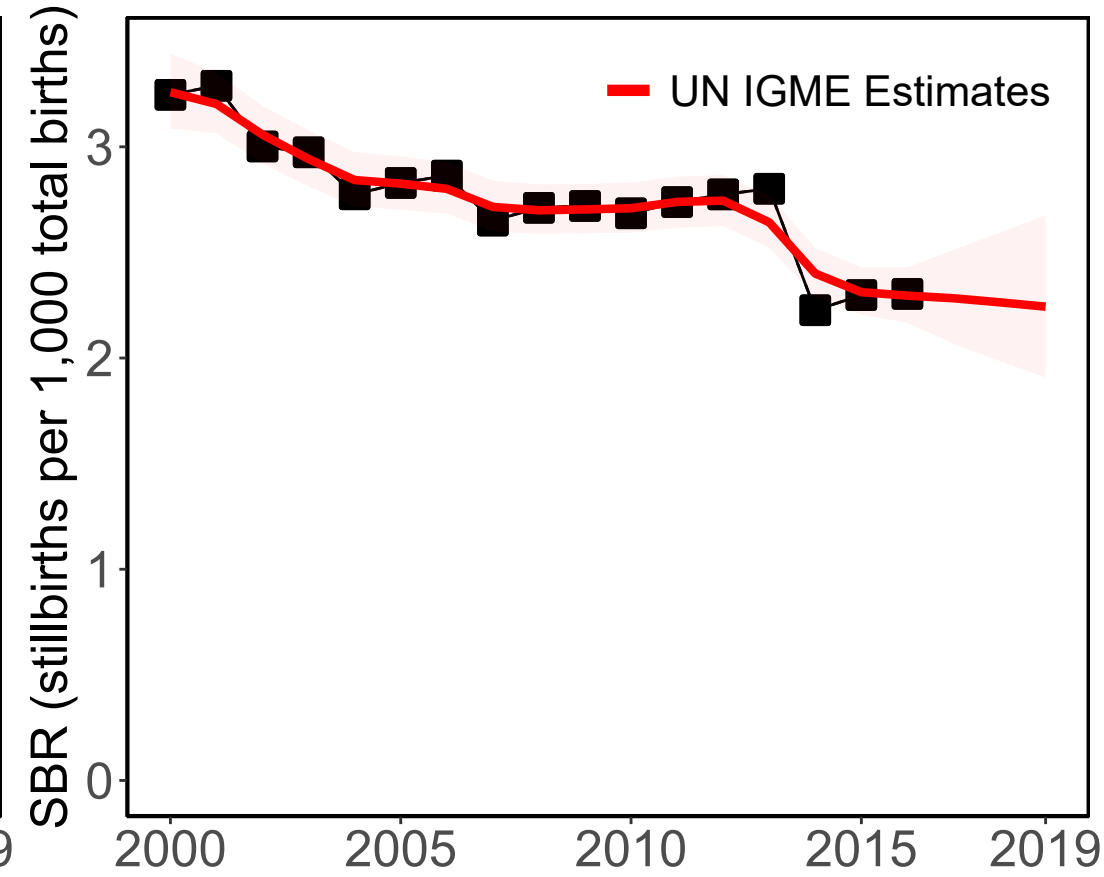

#### Source Types

□ Administrative

#### Data Sources

■ Vital Registration (28wks)

# Estonia

Available Data

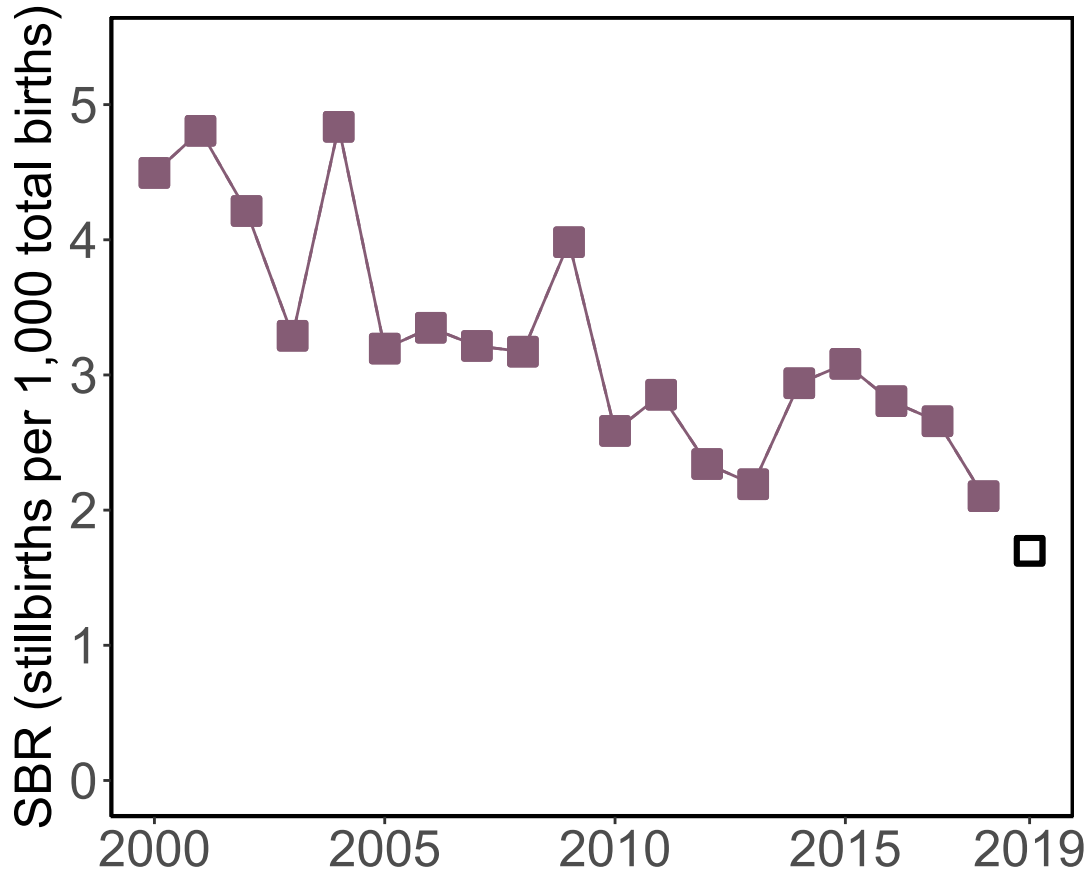

'28+ Weeks of Gestation' Data  
(Incl. Adjusted Data)

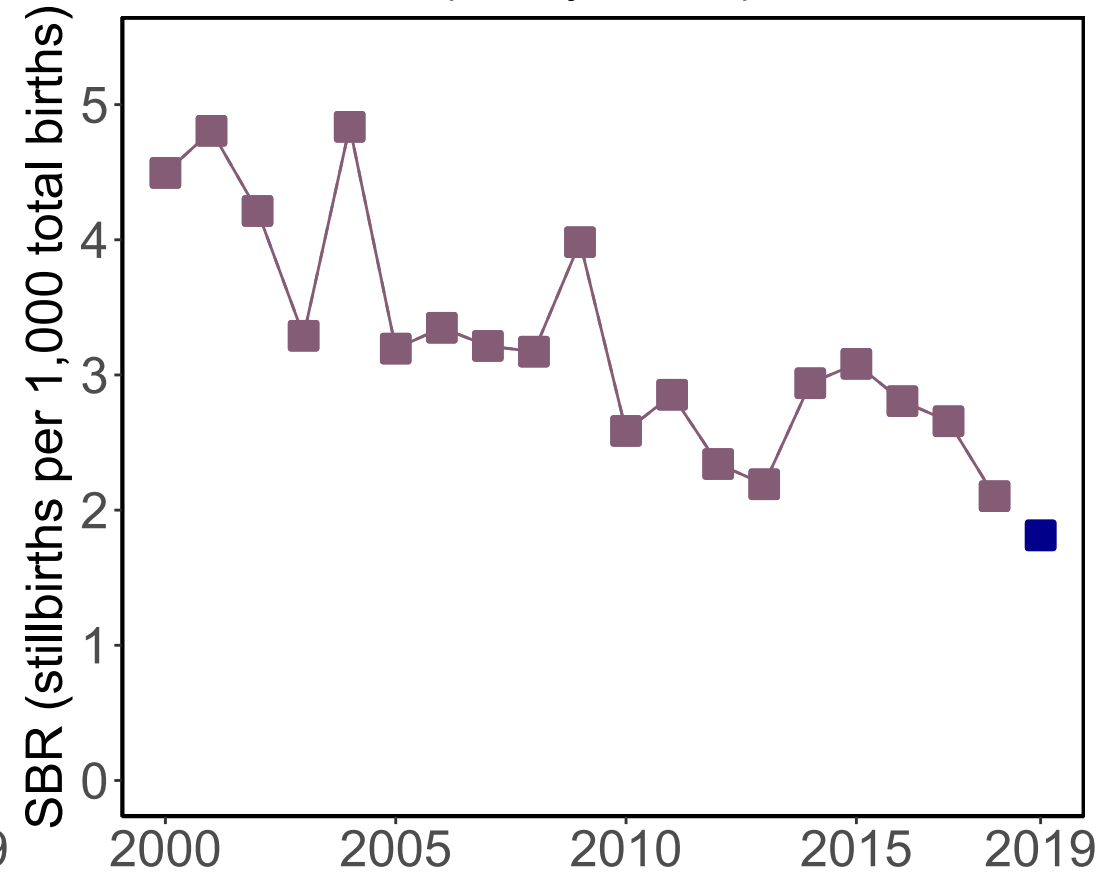

Data Included in the Model

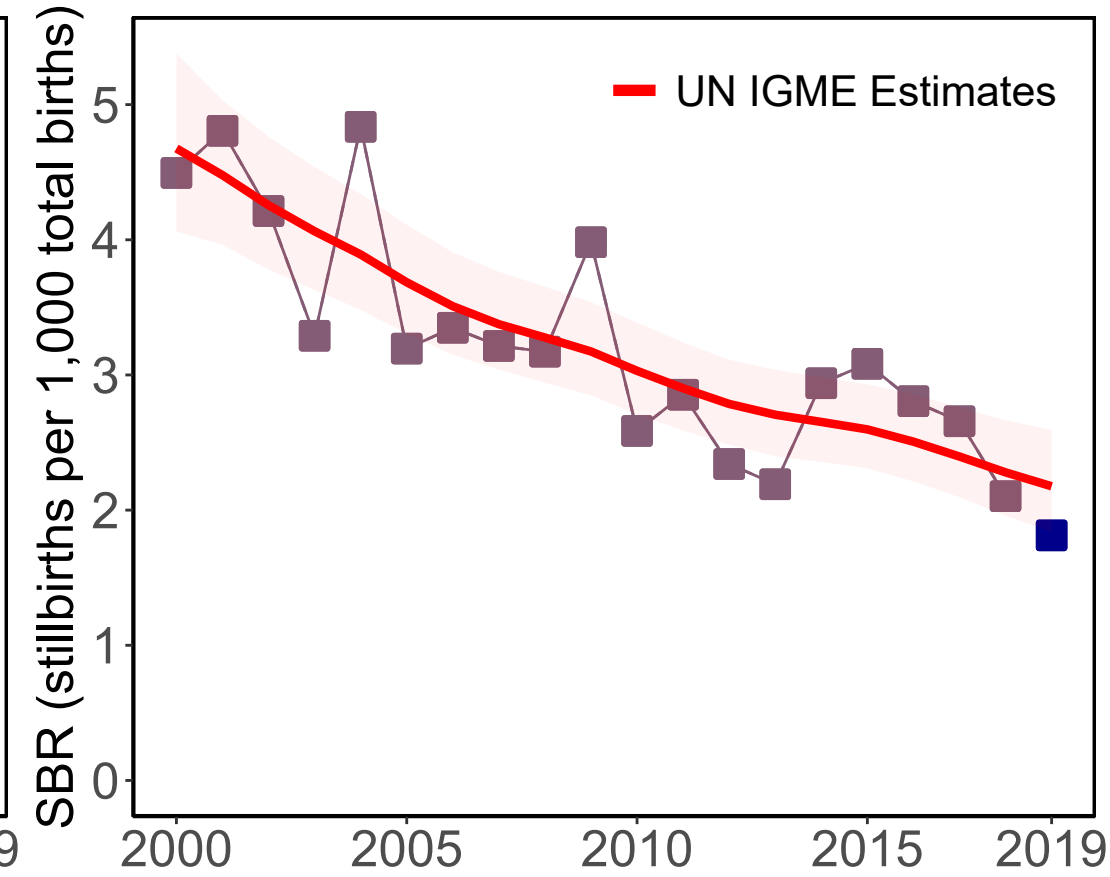

Source Types

Administrative

Data Sources

Birth or Death Registry (1000g)

Birth or Death Registry (28wks adj from 1000g)

Birth or Death Registry (28wks)

UN IGME Estimates

# Ethiopia

Available Data

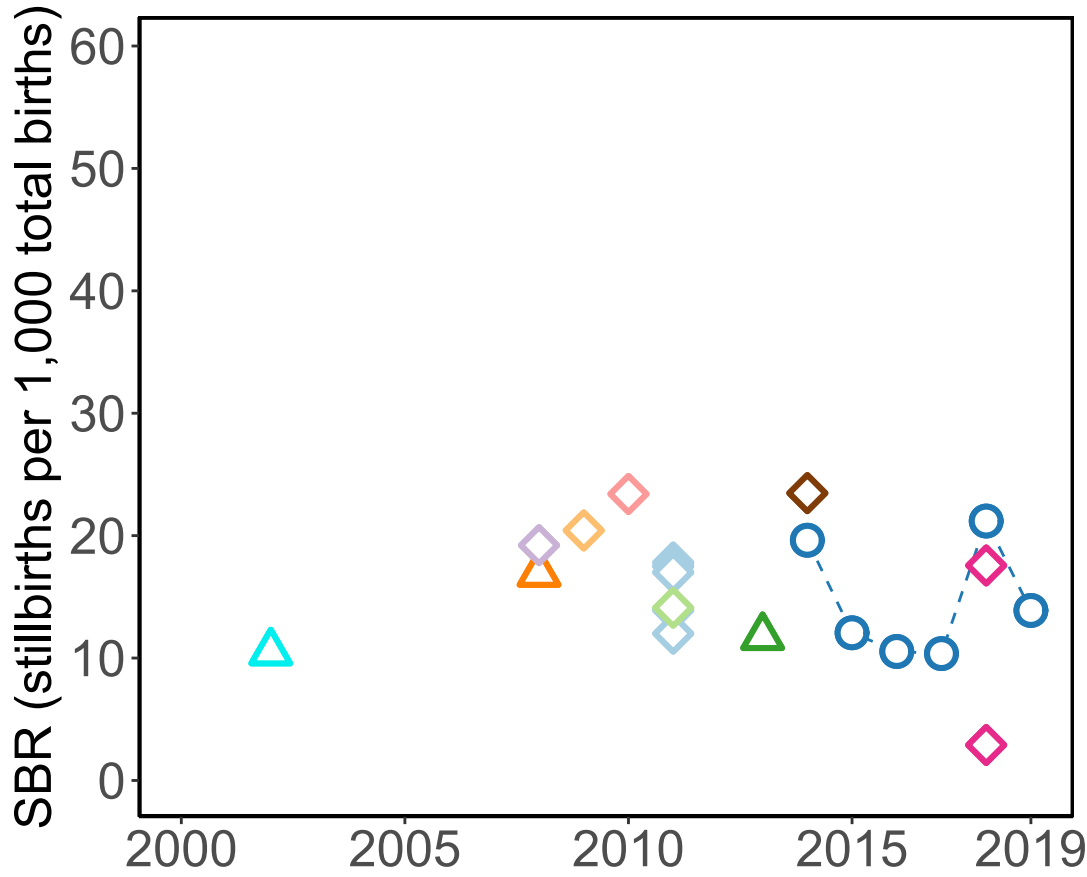

'28+ Weeks of Gestation' Data (Incl. Adjusted Data)

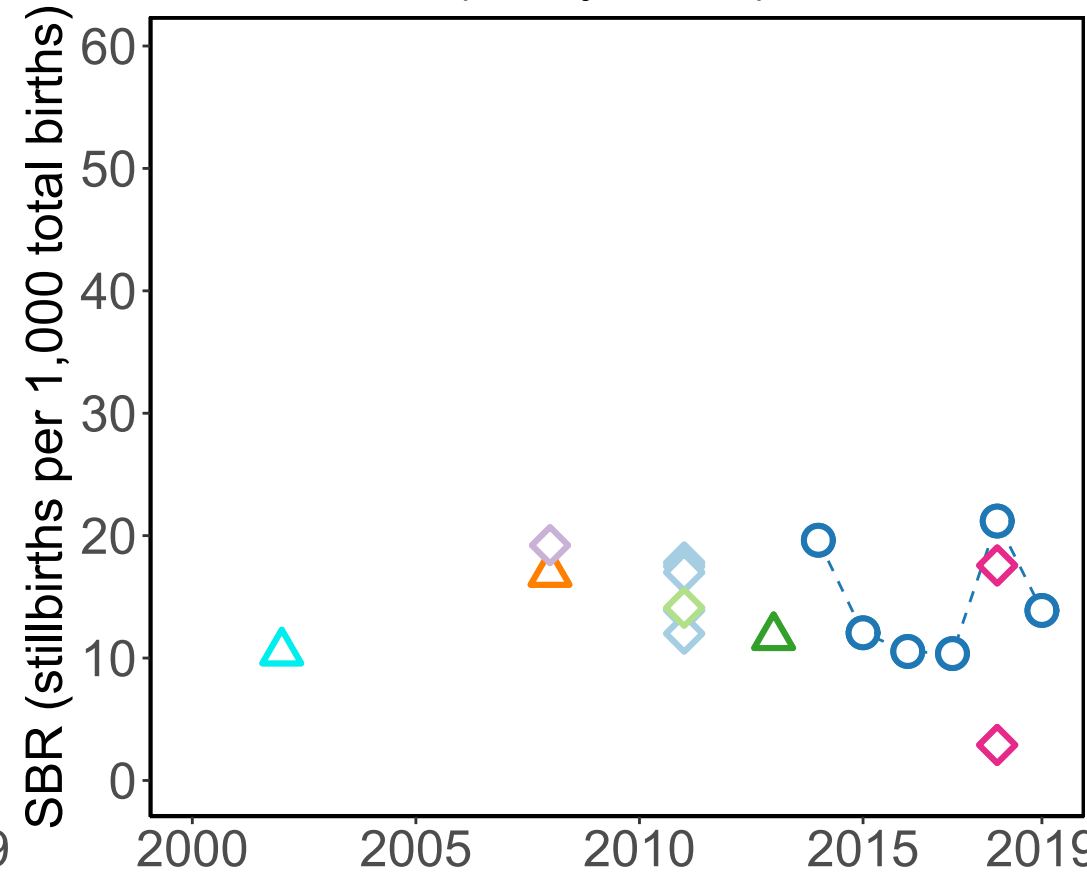

Data Included in the Model

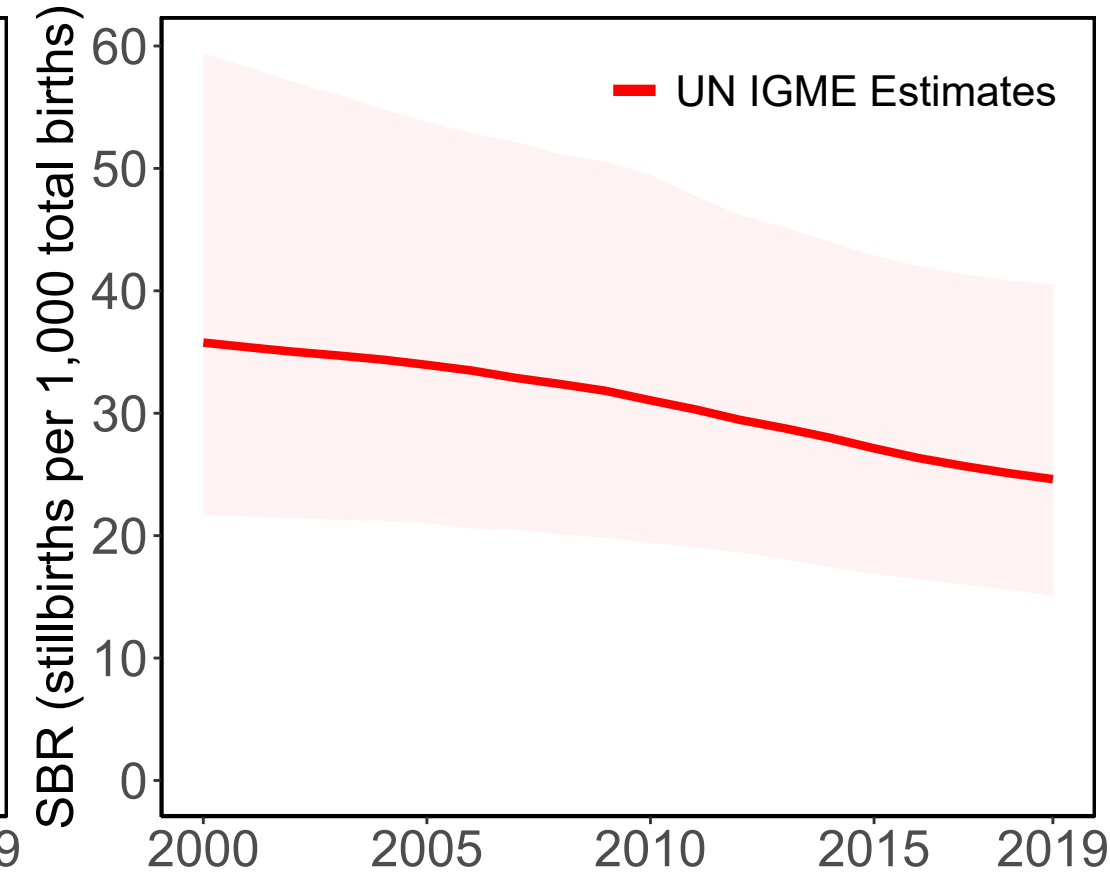

Source Types

- HMIS
- △ Survey
- ◇ Population study

Data Sources

- HMIS-DHIS2 (28wks)
- △ Demographic and Health Survey 2005 (DHS) (RC) (28wks)
- ◇ Waiswa (28wks)
- ◇ Assefa 2012 (not defined)
- △ Demographic and Health Survey 2016 (DHS) (RC) (28wks)
- ◇ CHAMPS (28wks)
- ◇ Yirgu 2016 (28wks)
- ◇ Yaya 2014 (28wks)
- △ Demographic and Health Survey 2011 (DHS) (RC) (28wks)
- ◇ Atnafu 2016 (not defined)
- ◇ Andargie 2013 (not defined)

# Finland

### Available Data

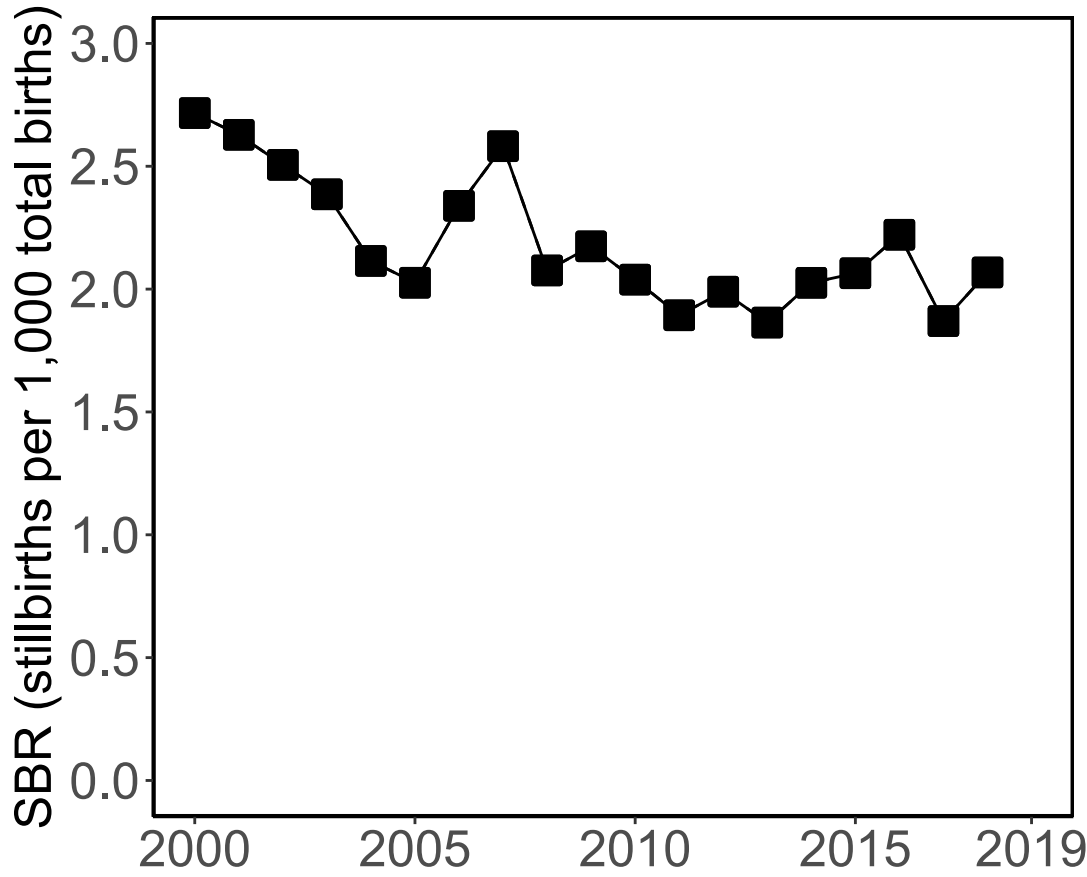

### '28+ Weeks of Gestation' Data (Incl. Adjusted Data)

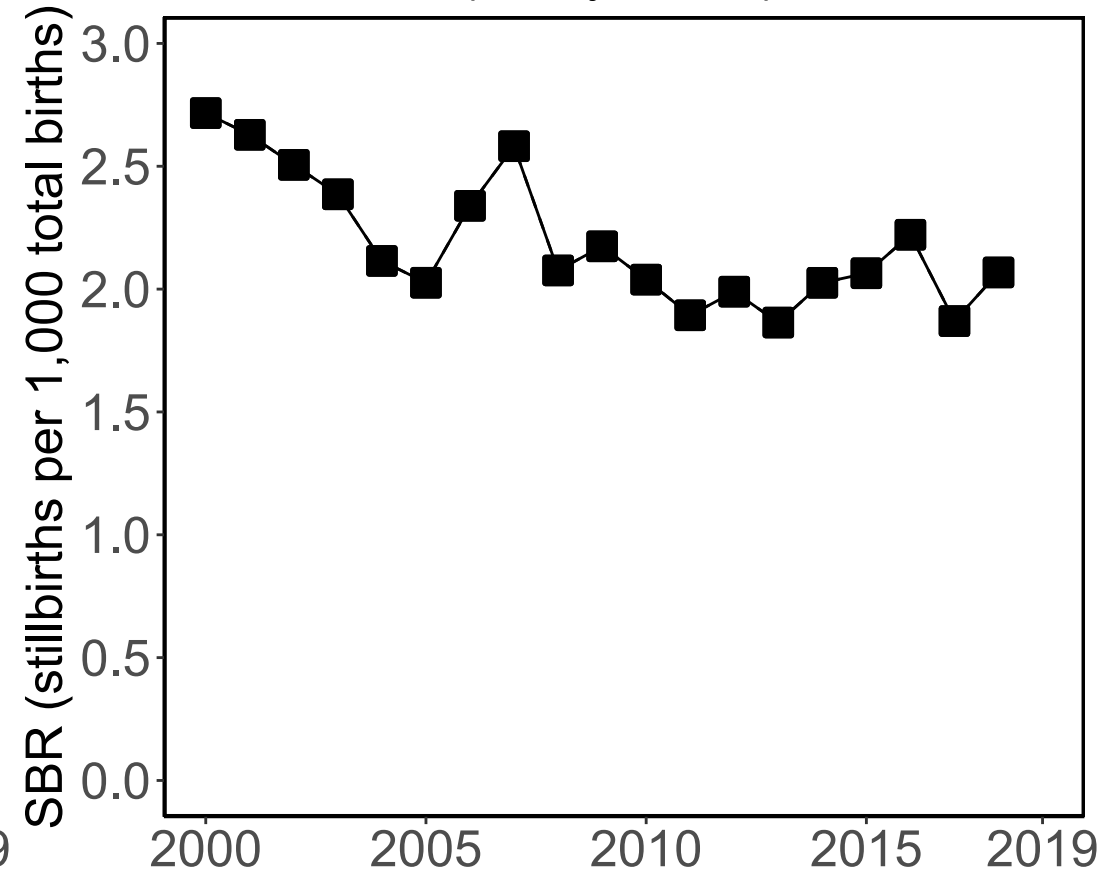

### Data Included in the Model

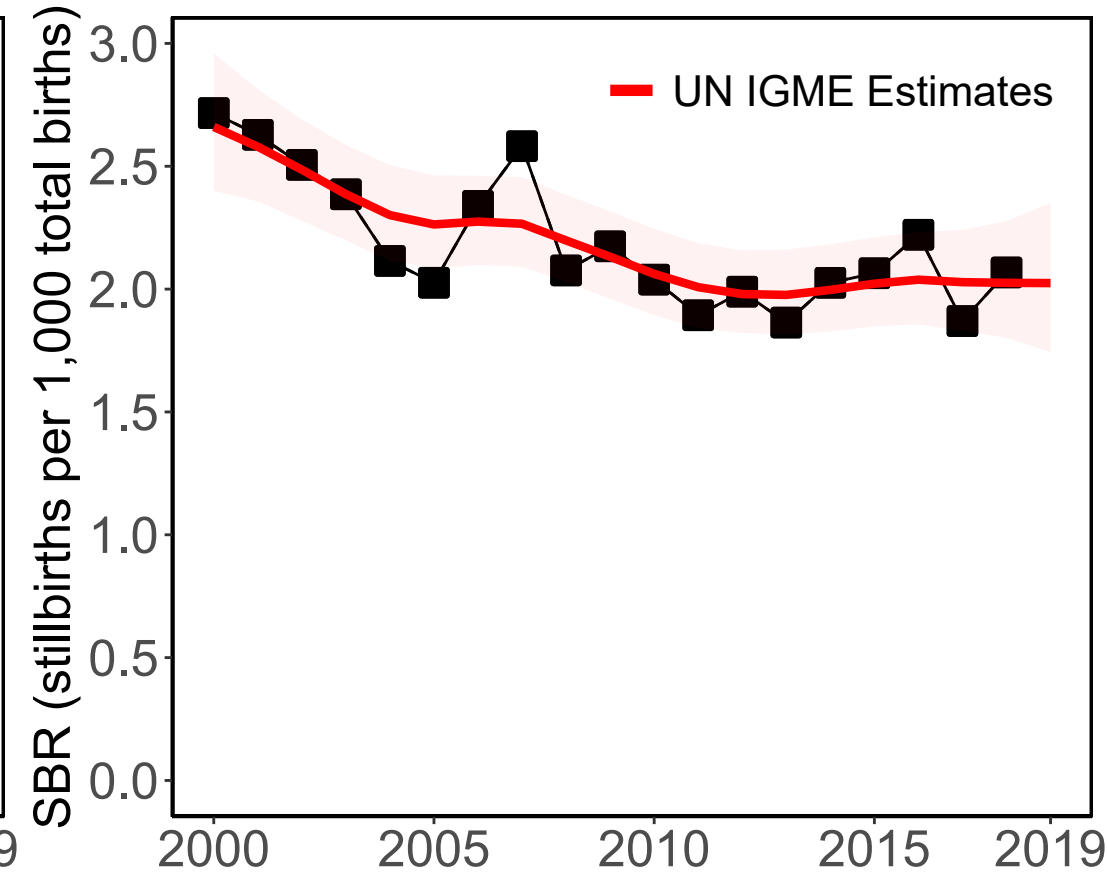

#### Source Types

□ Administrative

#### Data Sources

■ Birth or Death Registry (28wks)

# Fiji

### Available Data

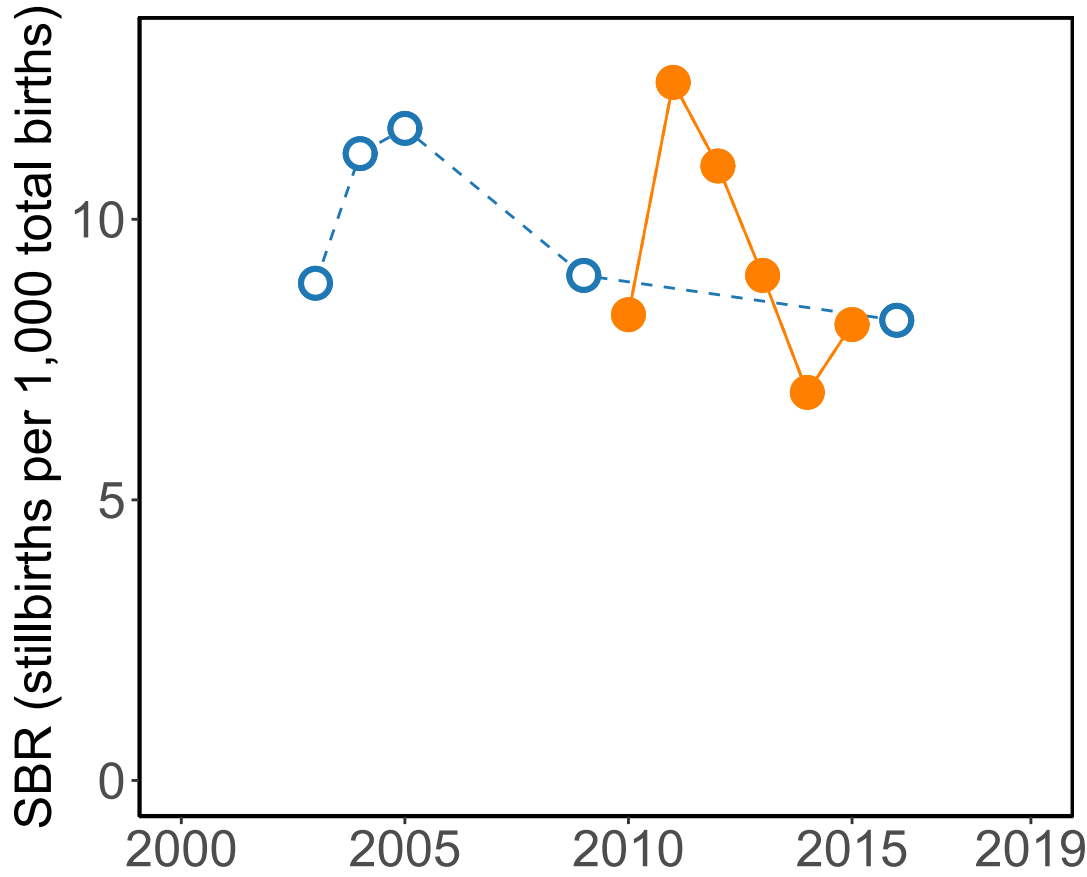

### '28+ Weeks of Gestation' Data (Incl. Adjusted Data)

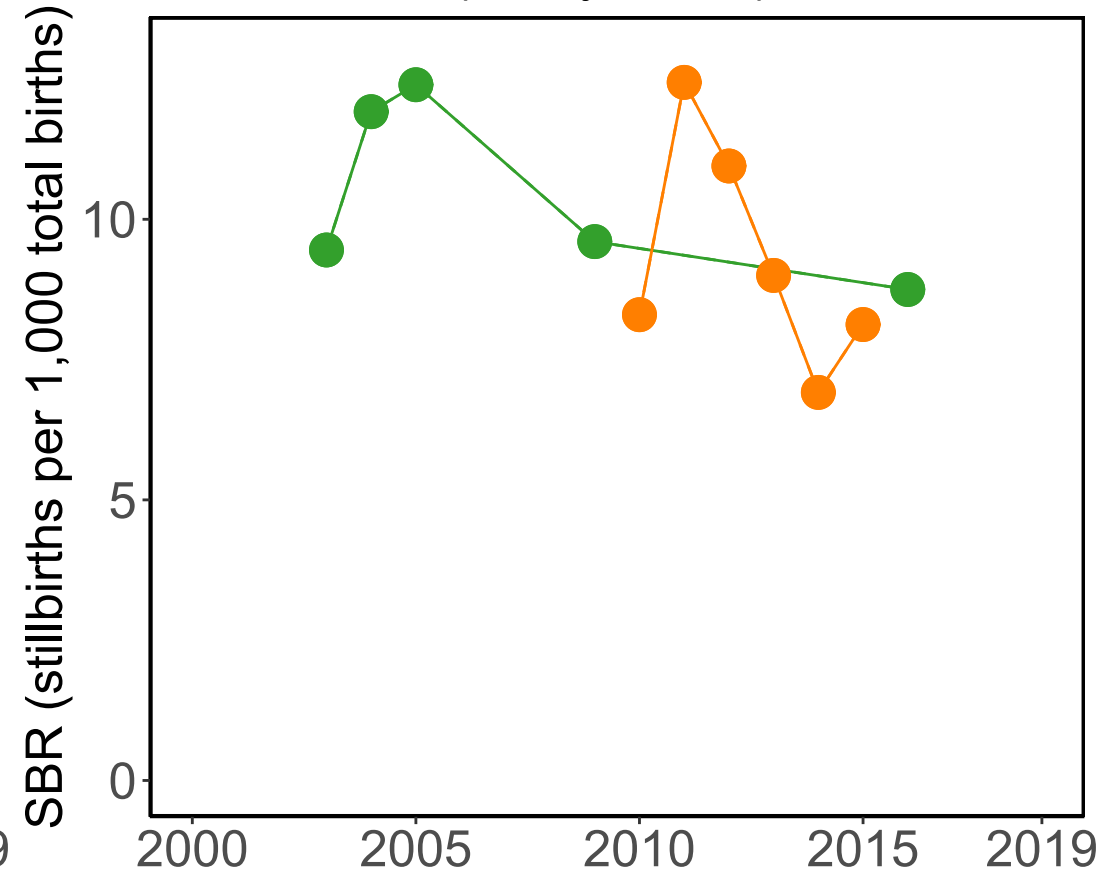

### Data Included in the Model

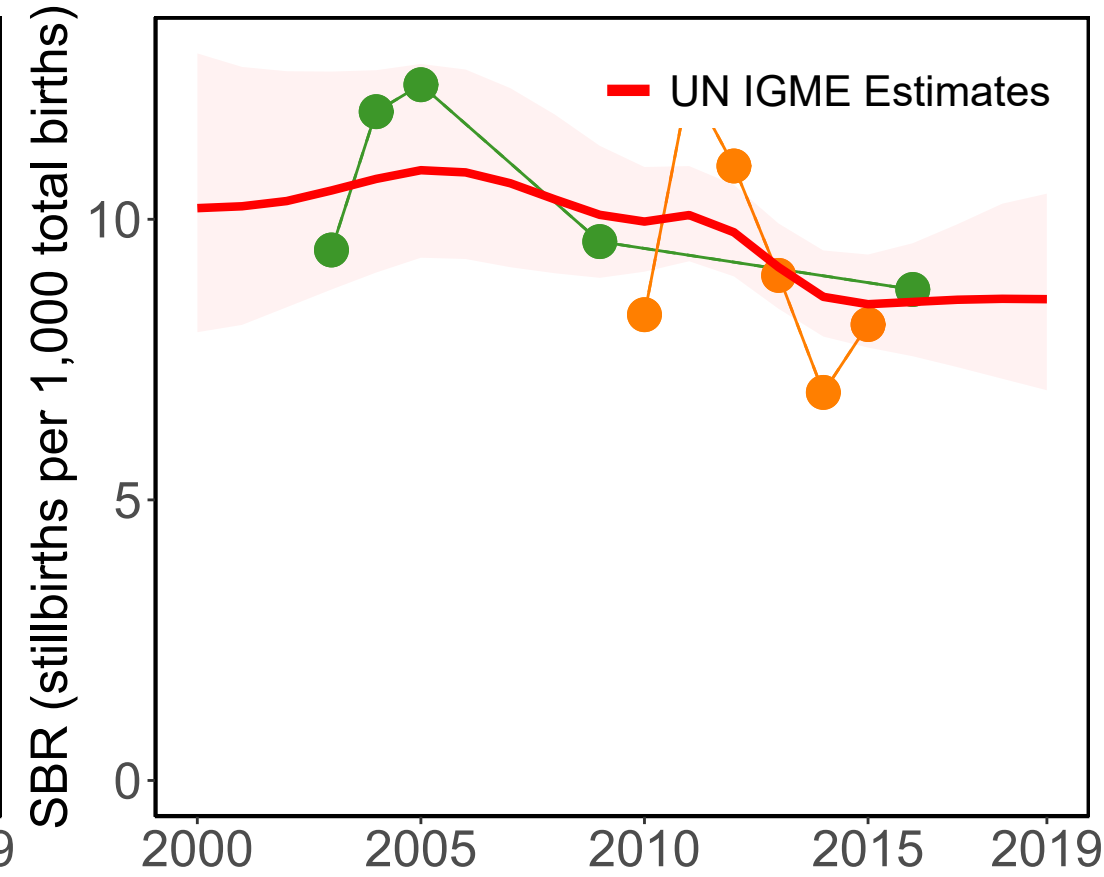

#### Source Types



HMIS

#### Data Sources

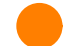

HMIS-DHIS2 (28wks)

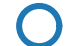

HMIS-DHIS2 (1000g)

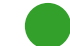

HMIS-DHIS2 (28wks adj from 1000g)

UN IGME Estimates

# France

Available Data

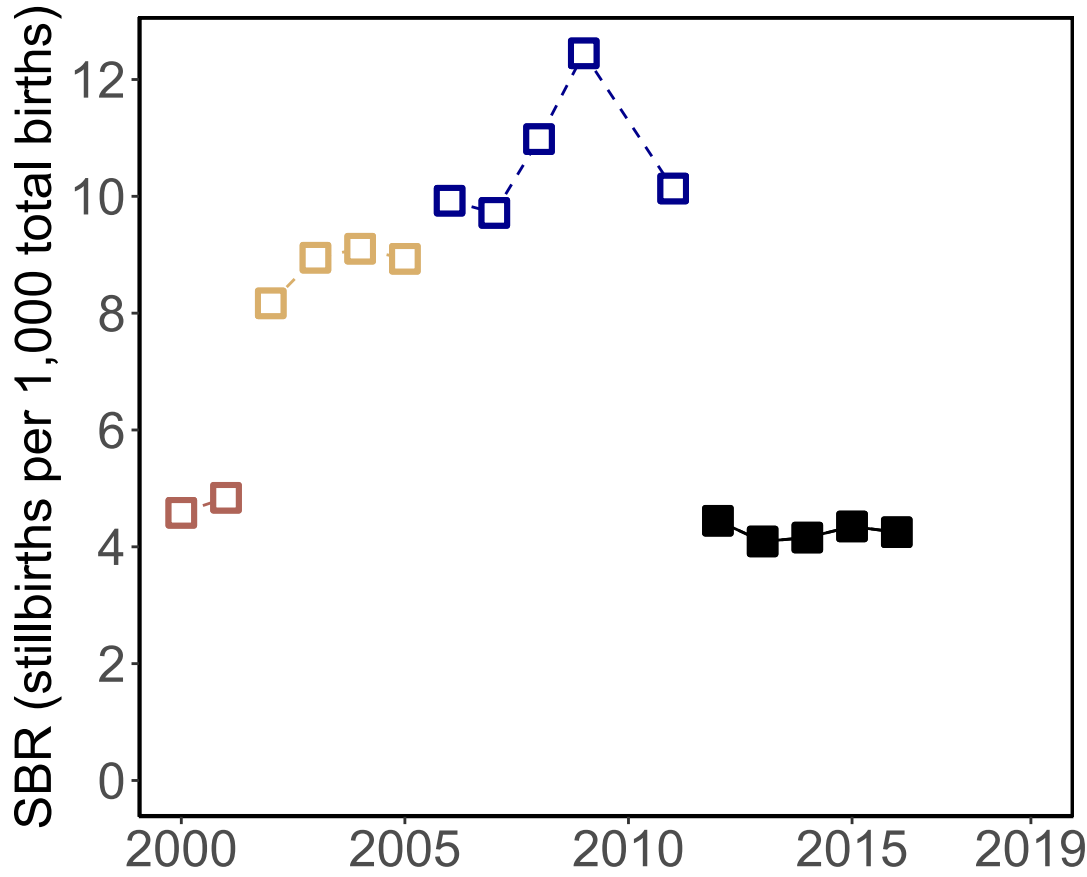

'28+ Weeks of Gestation' Data  
(Incl. Adjusted Data)

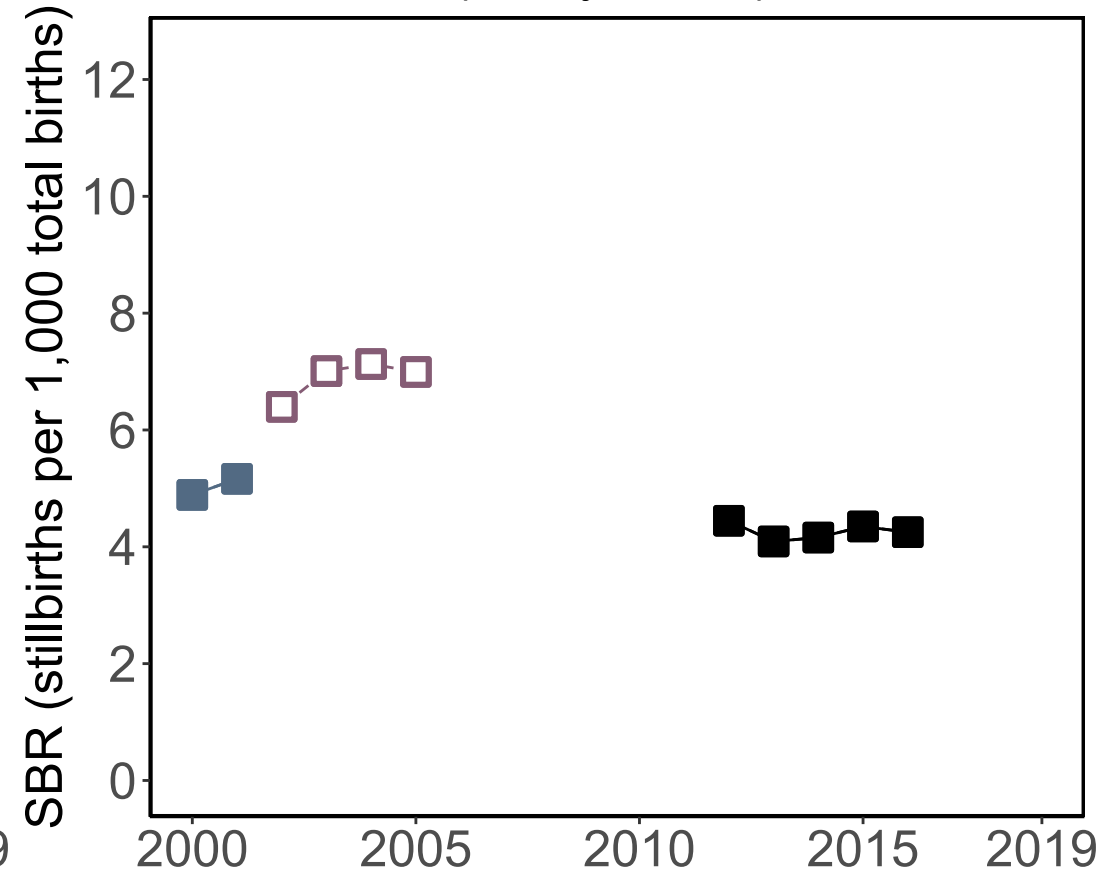

Data Included in the Model

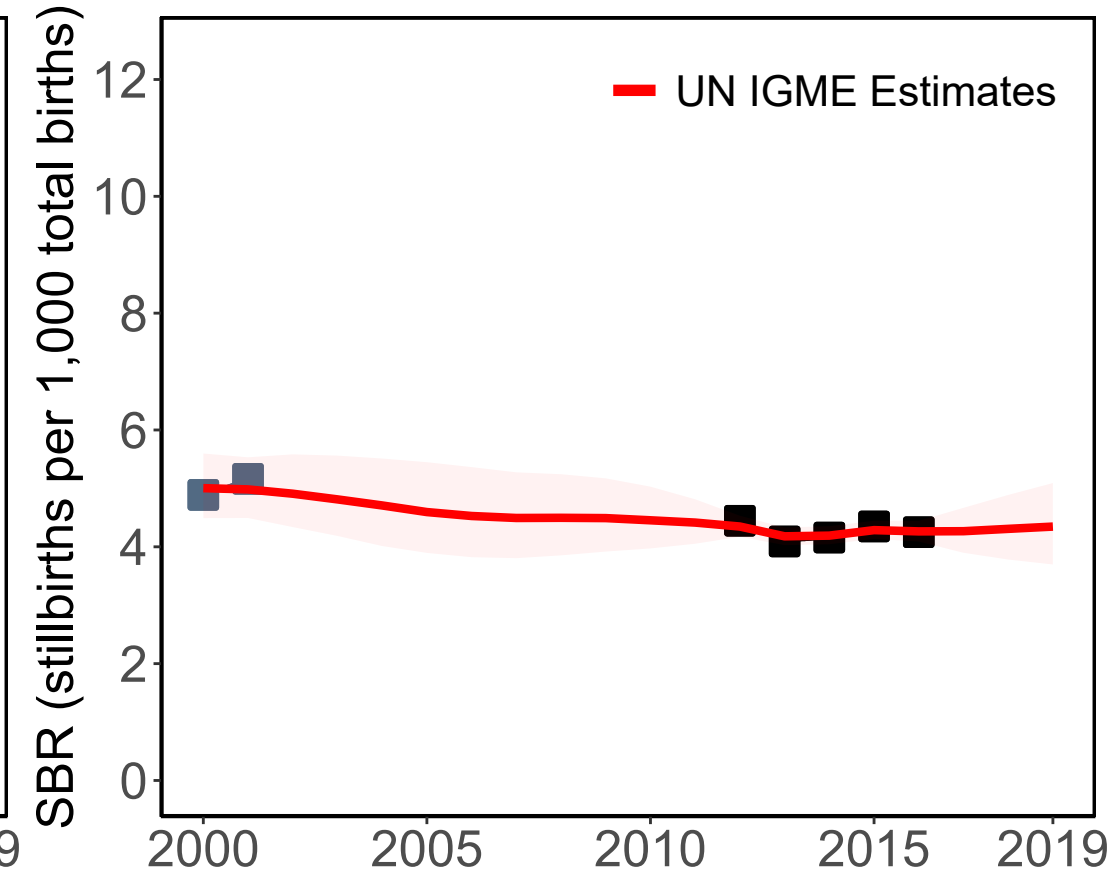

Source Types

Administrative

Data Sources

Birth or Death Registry (28wks)

Vital Registration (any gestational age or birthweight)

Vital Registration (28wks adj from 500g)

Vital Registration (500g)

Vital Registration (1000g)

Vital Registration (28wks adj from 1000g)

UN IGME Estimates

# Micronesia (Federated States of)

Available Data

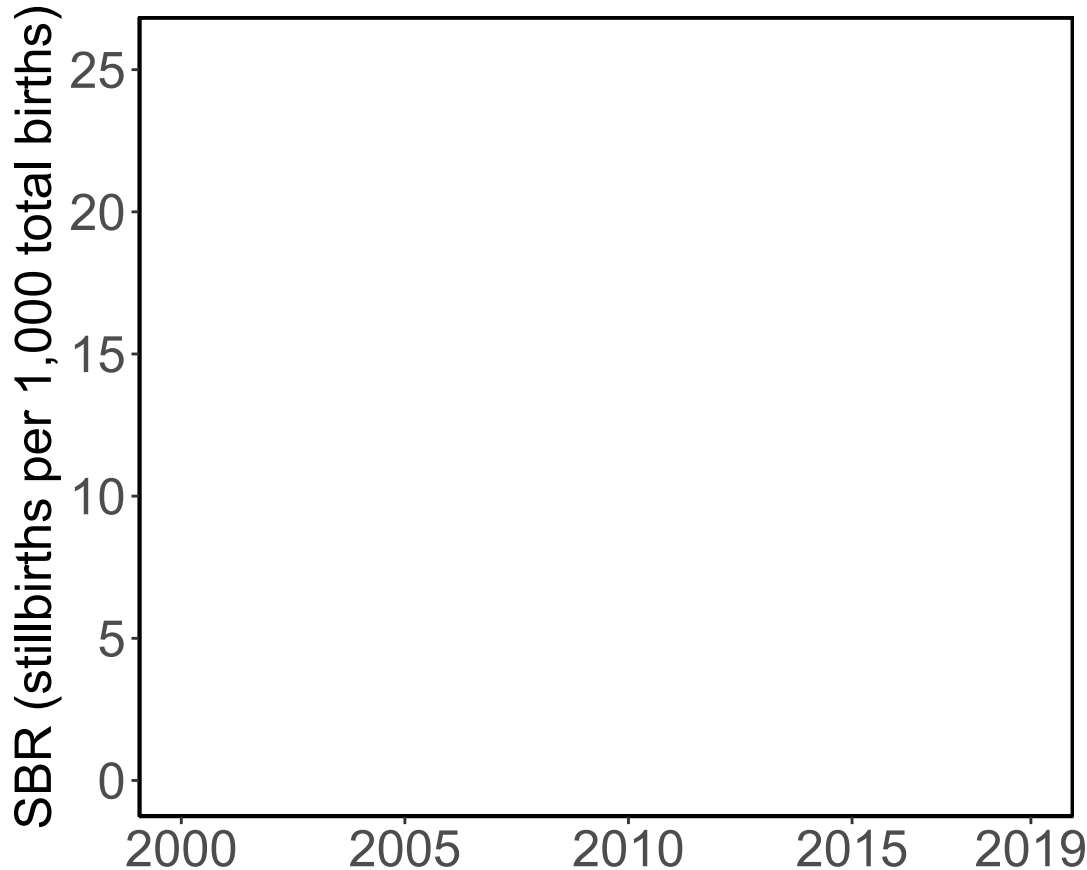

'28+ Weeks of Gestation' Data  
(Incl. Adjusted Data)

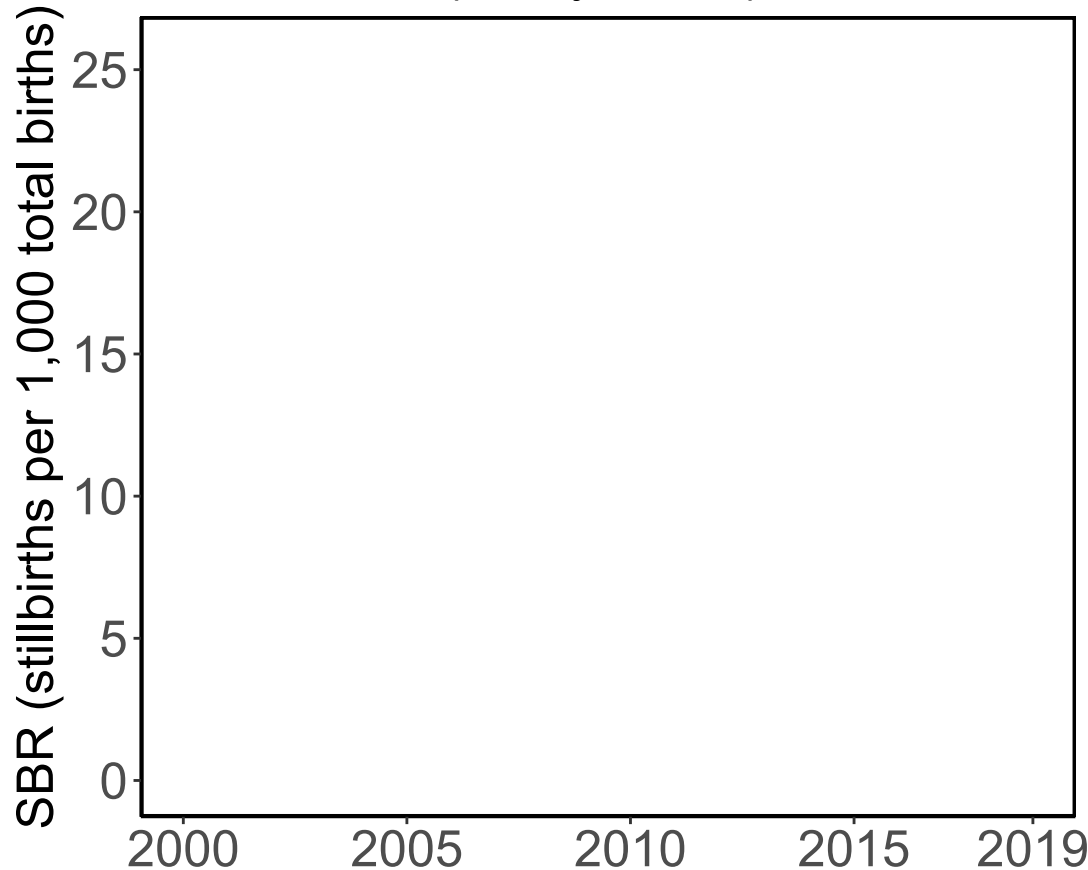

Data Included in the Model

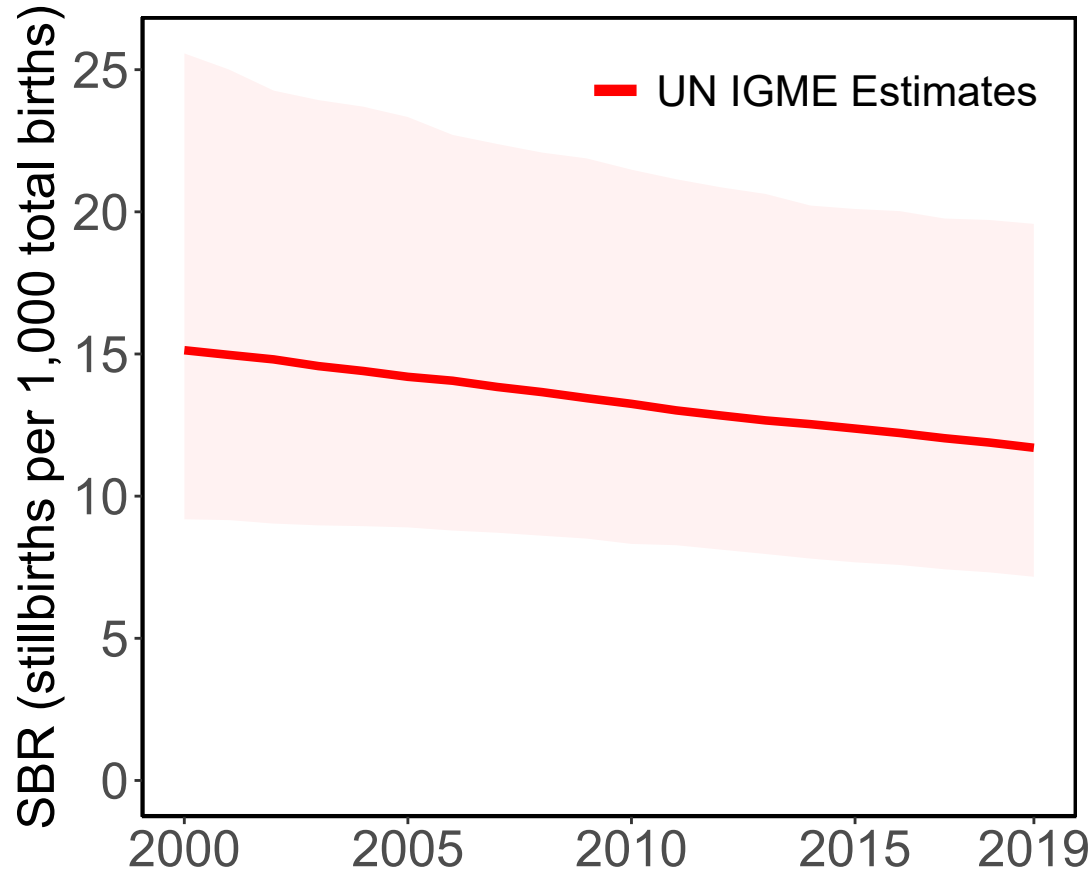



# Gabon

Available Data

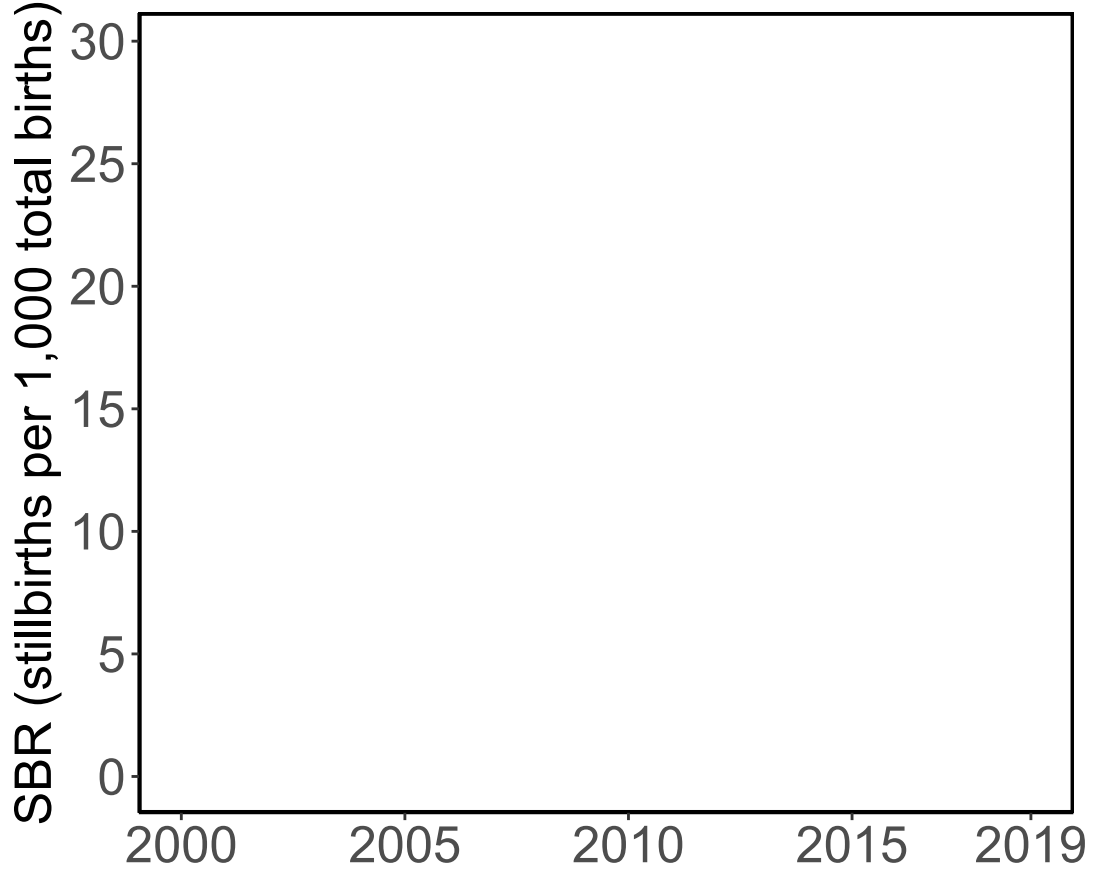

'28+ Weeks of Gestation' Data  
(Incl. Adjusted Data)

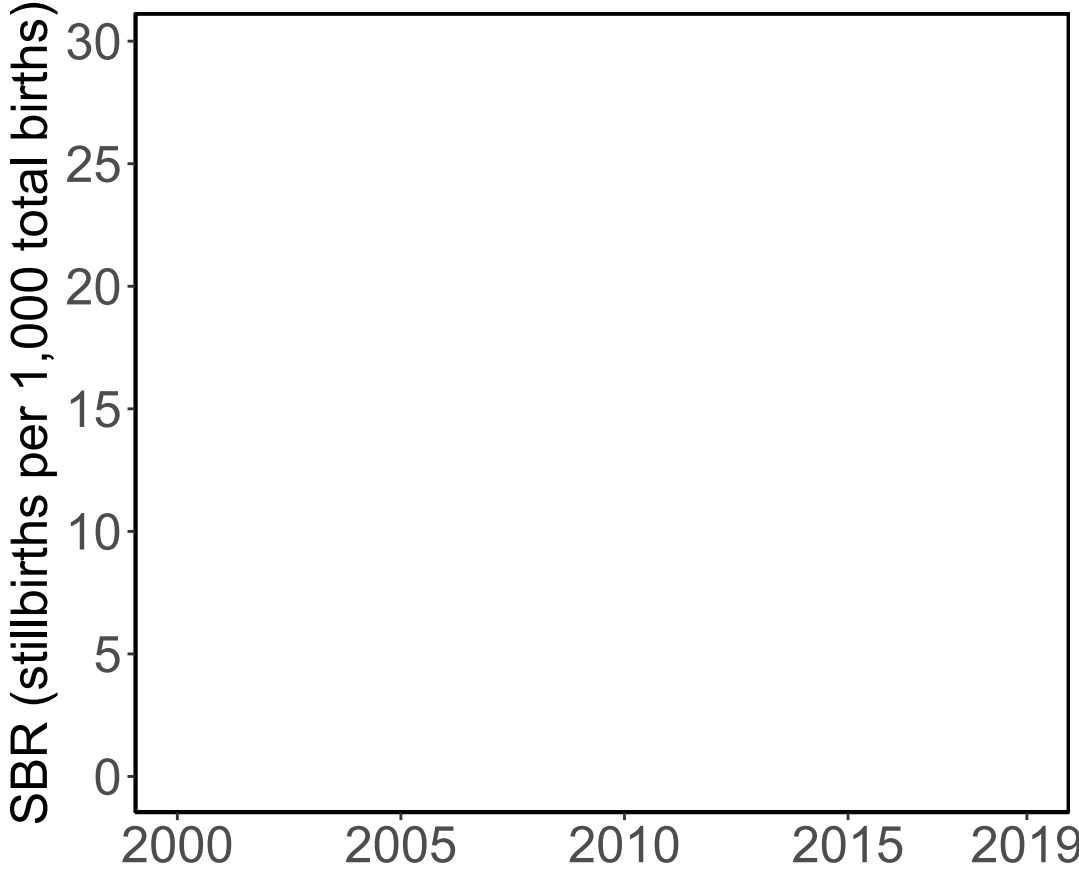

Data Included in the Model

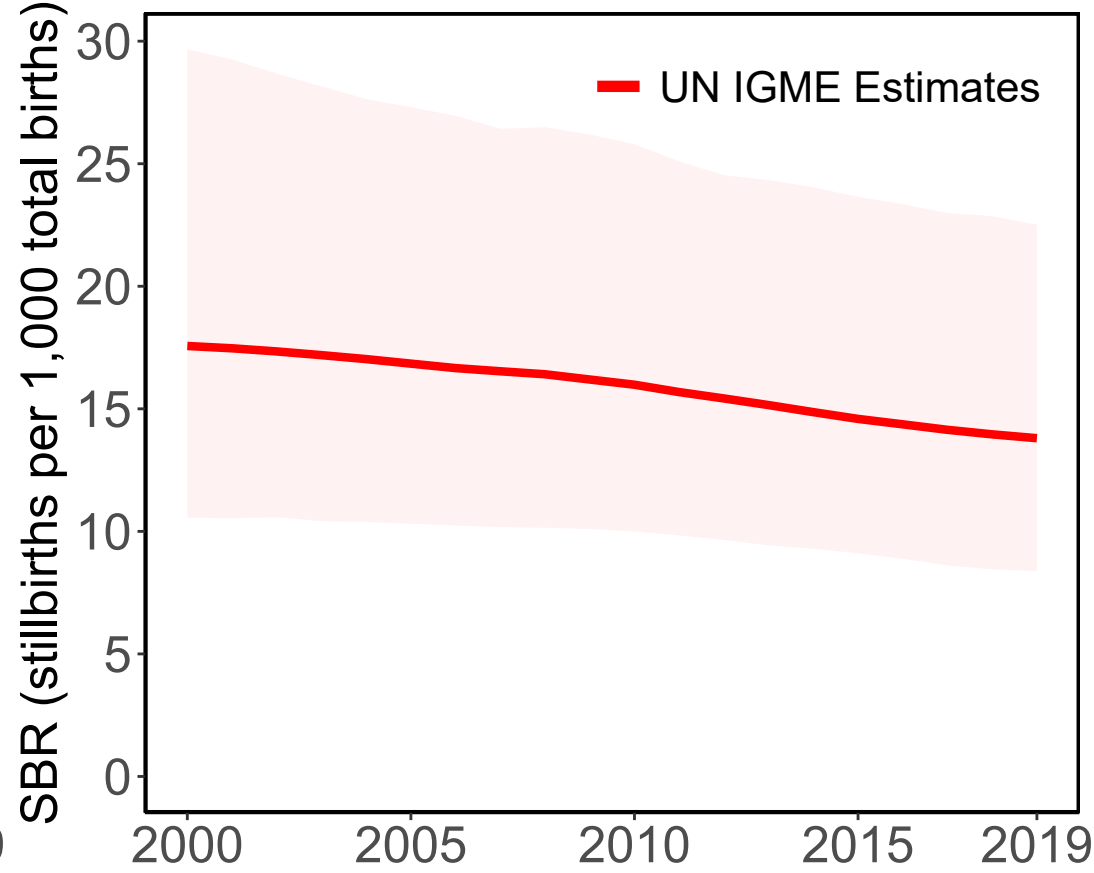

# United Kingdom

Available Data

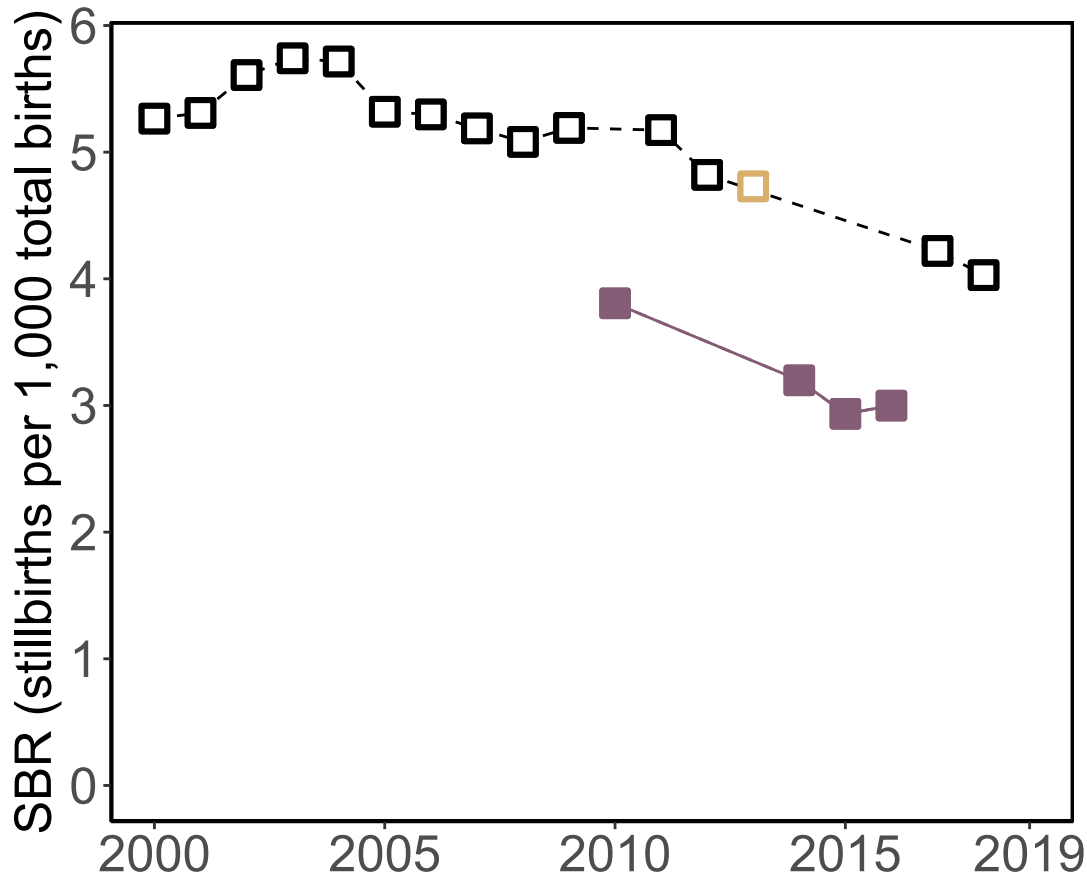

'28+ Weeks of Gestation' Data  
(Incl. Adjusted Data)

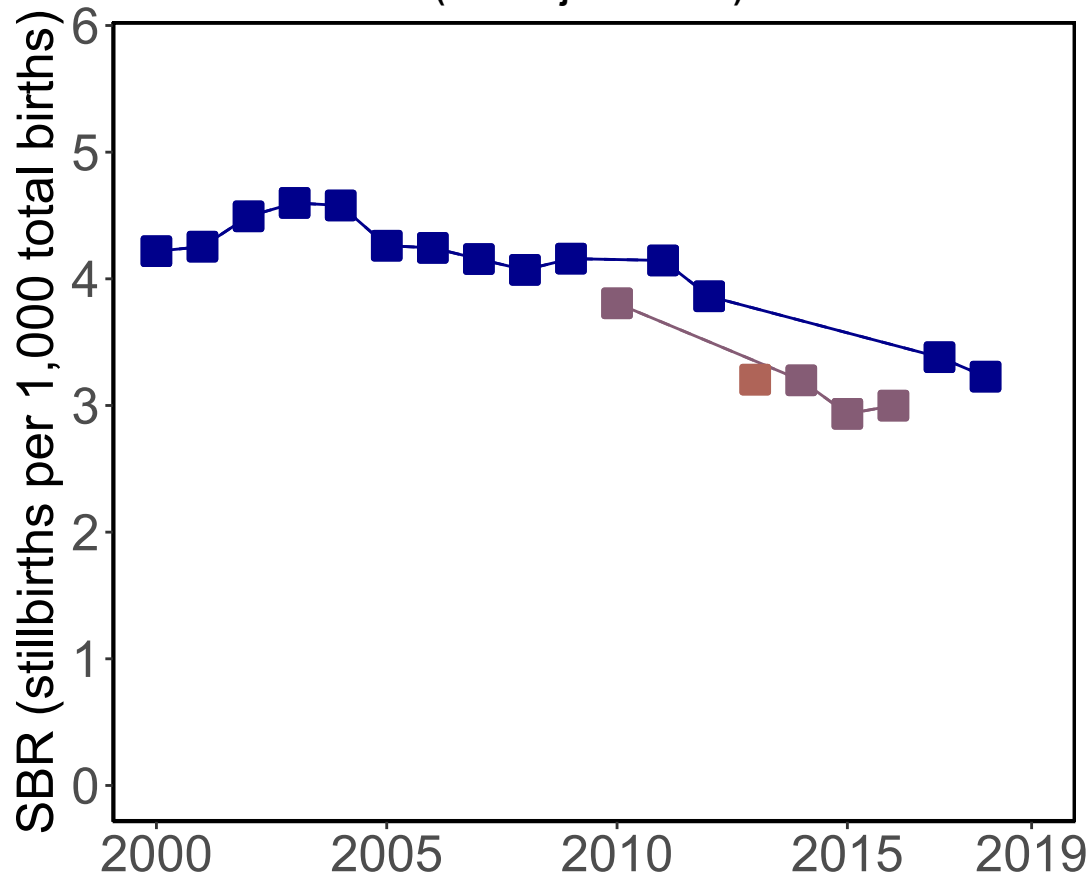

Data Included in the Model

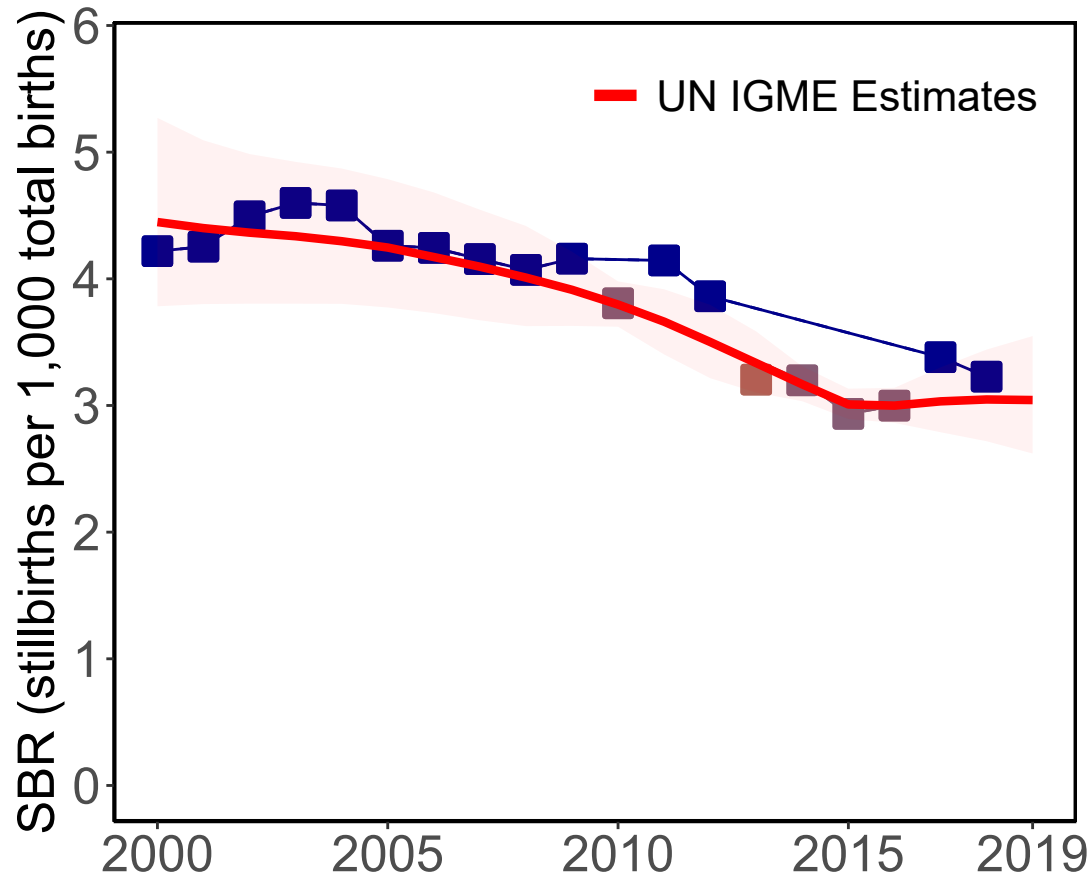

Data Sources

Source Types

Administrative

Vital Registration (28wks)

Vital Registration (22wks)

Vital Registration (28wks adj from 22wks)

Vital Registration (24wks)

Vital Registration (28wks adj from 24wks)

UN IGME Estimates

# Georgia

Available Data

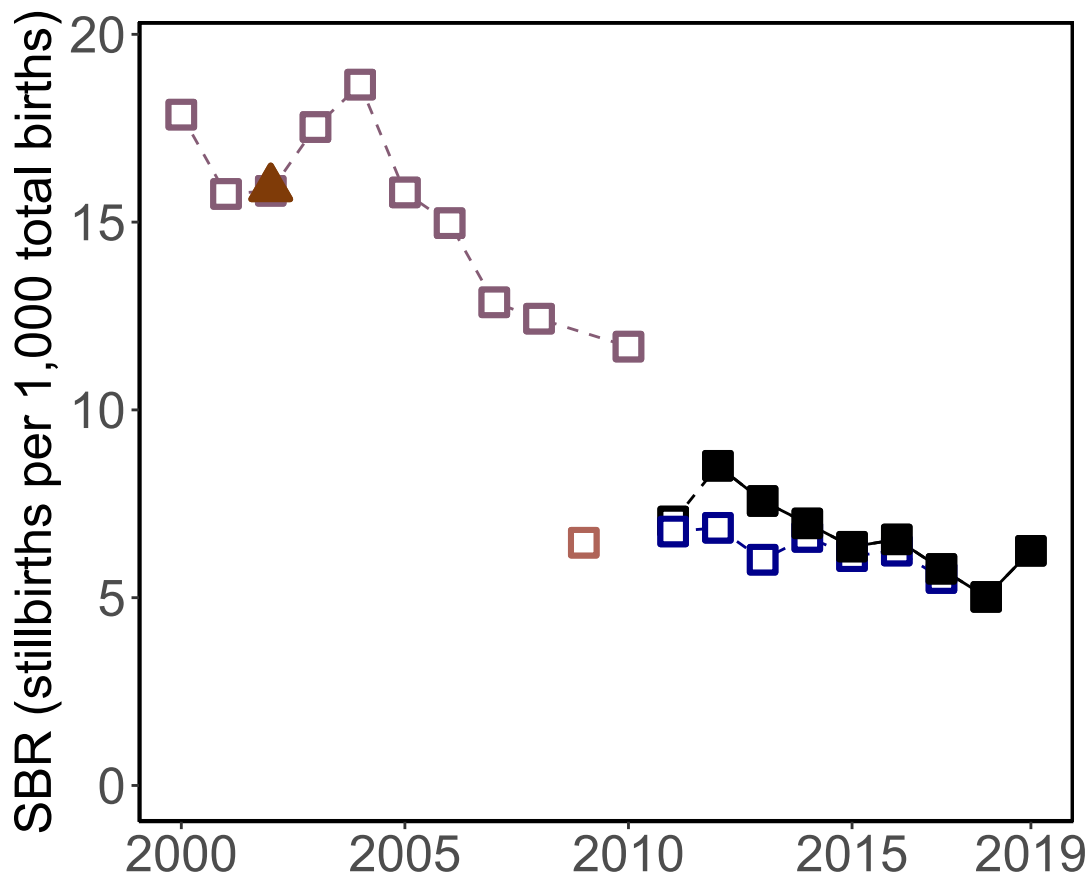

'28+ Weeks of Gestation' Data  
(Incl. Adjusted Data)

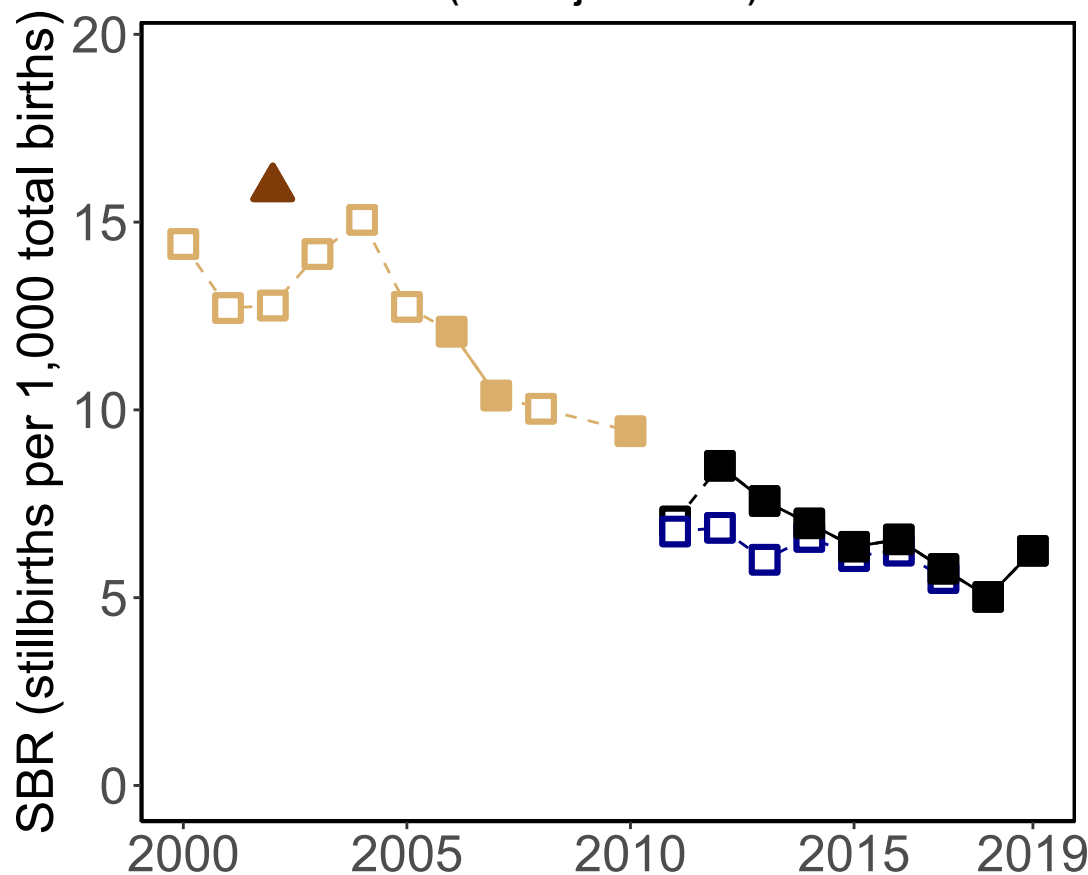

Data Included in the Model

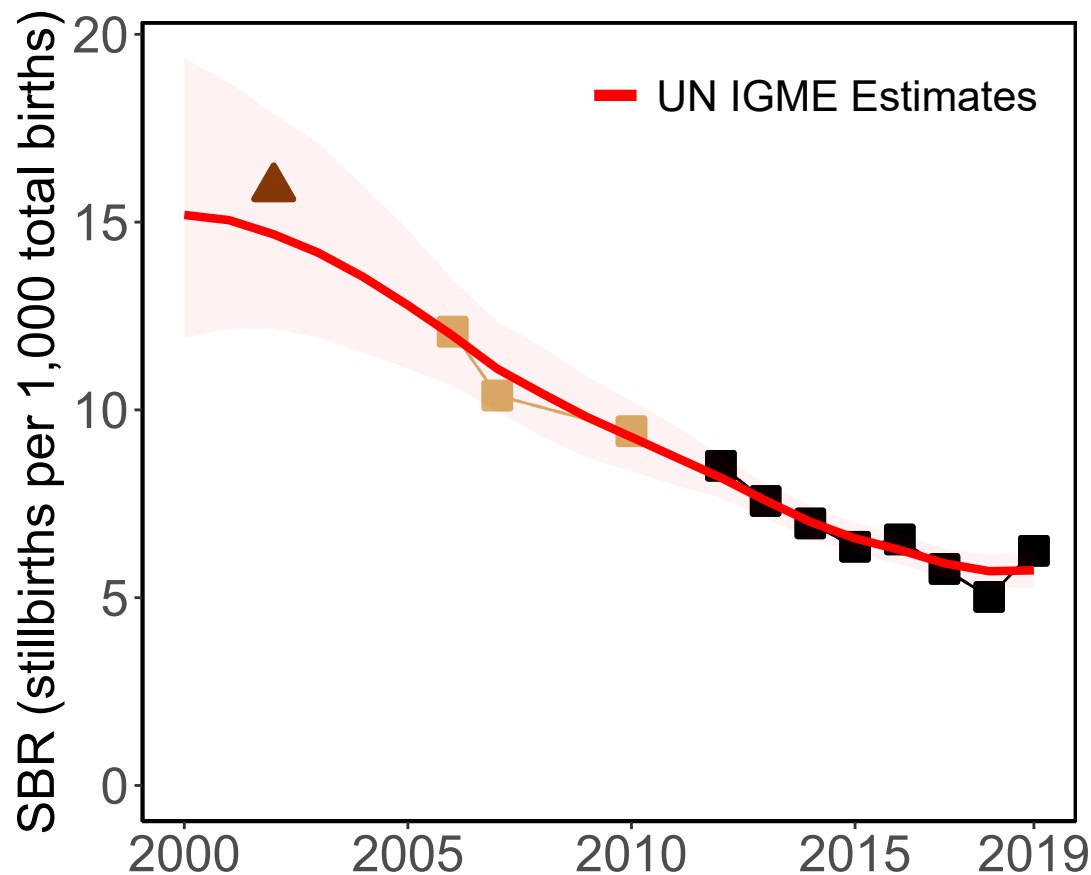

Source Types

□ Administrative    △ Survey

Data Sources

■ Birth or Death Registry (28wks)

□ Vital Registration (28wks)

□ Birth or Death Registry (1000g)

■ Birth or Death Registry (28wks adj from 22wks)

□ Birth or Death Registry (22wks)

■ Reproductive Health Survey 2005 (RHS) (PH/SQ) (28wks)

— UN IGME Estimates

# Ghana

Available Data

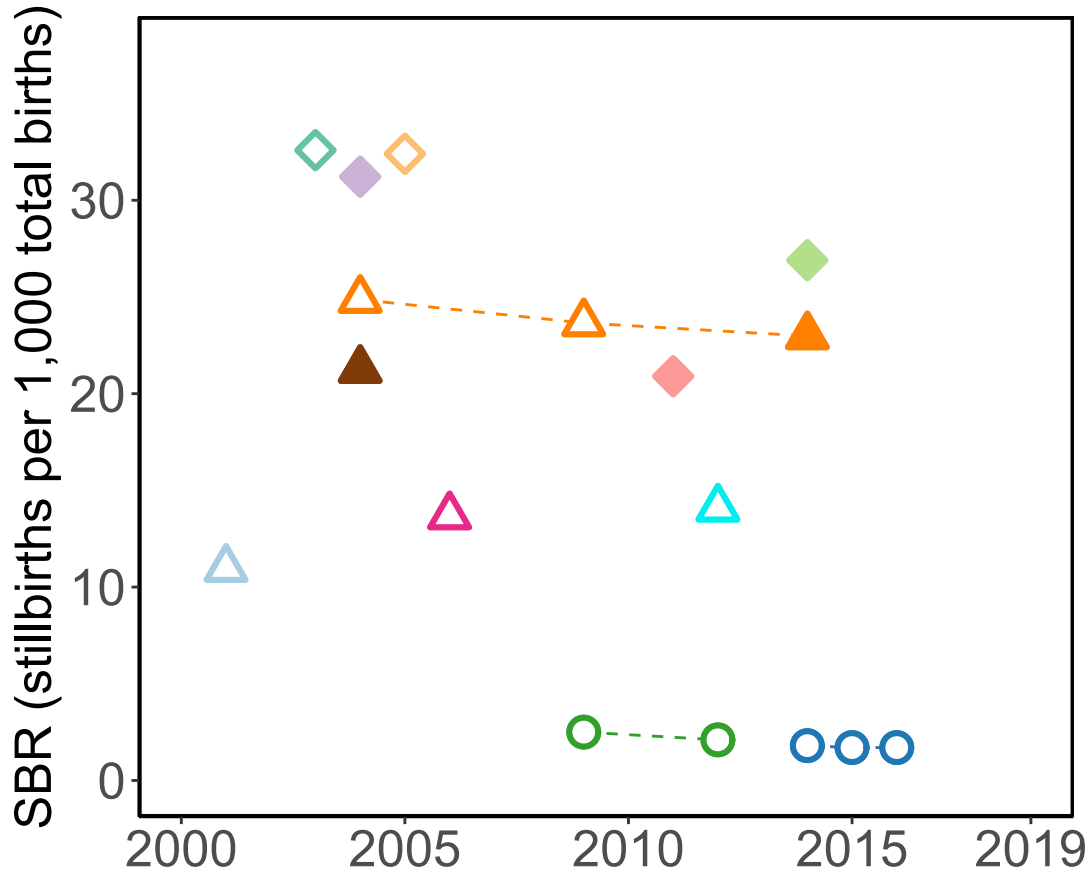

'28+ Weeks of Gestation' Data (Incl. Adjusted Data)

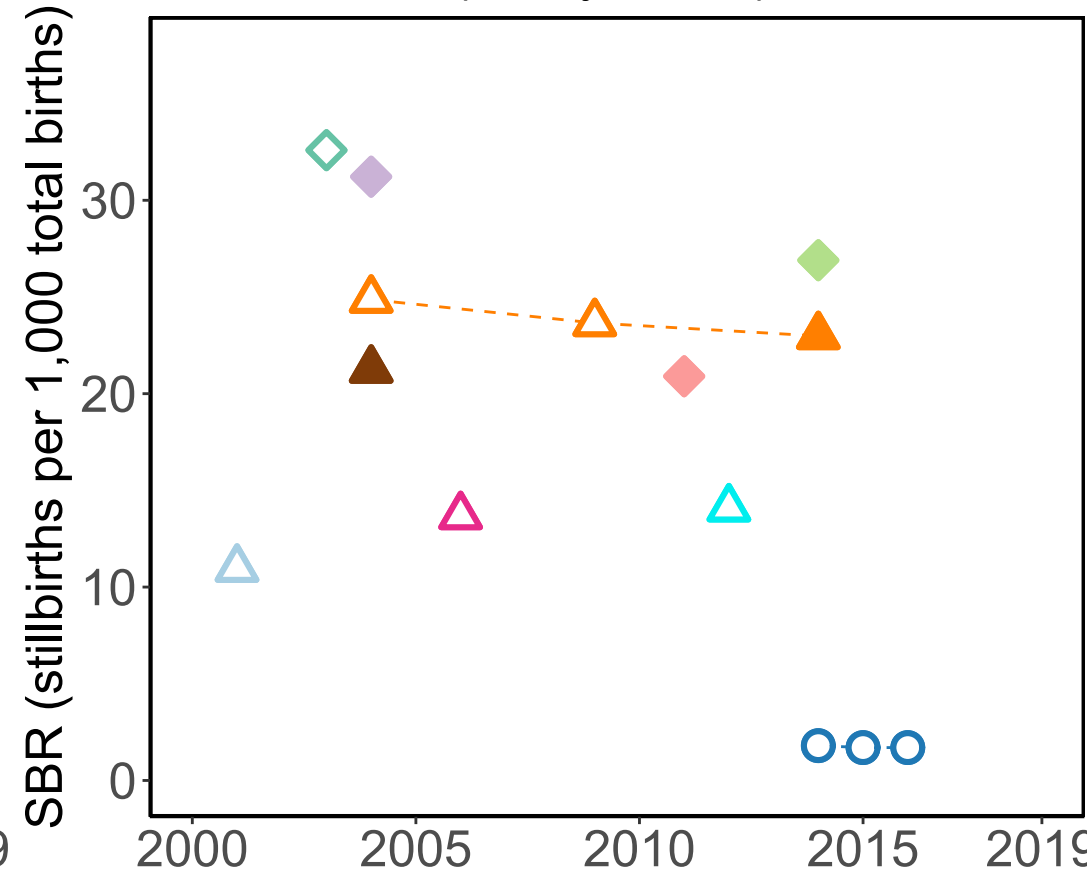

Data Included in the Model

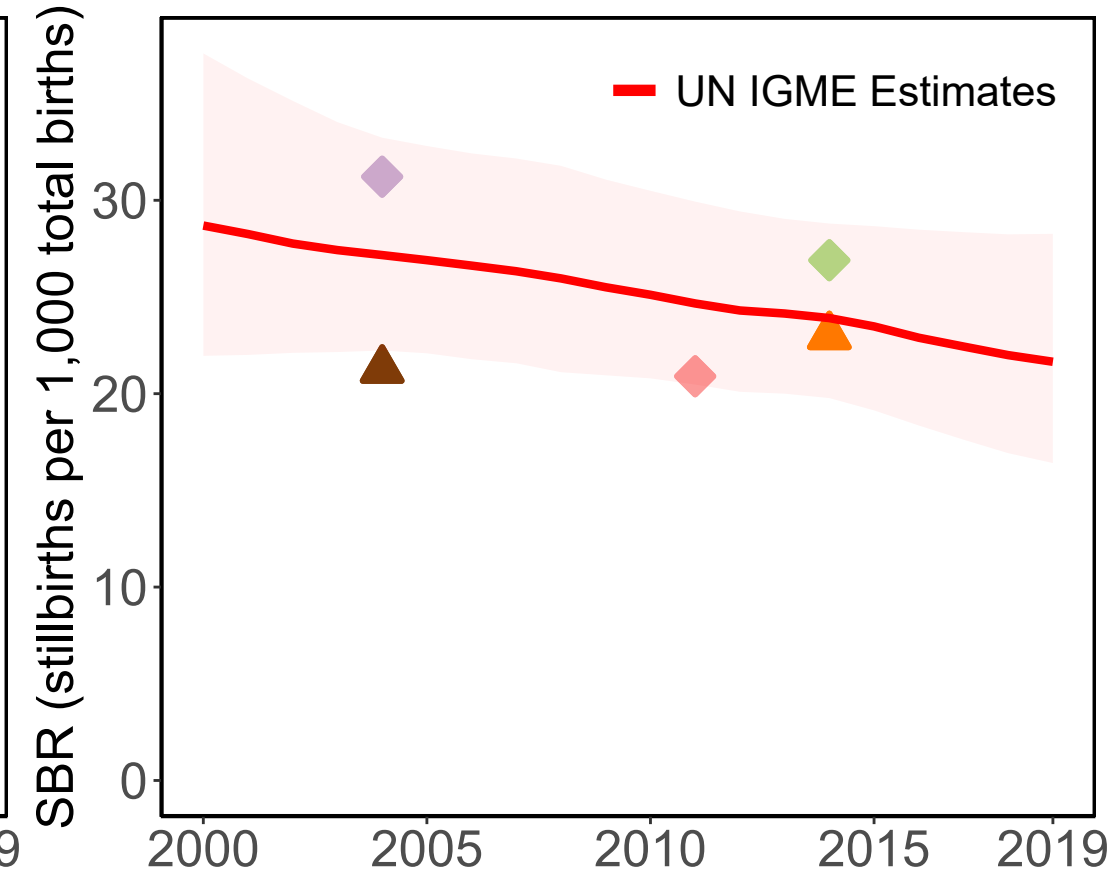

Source Types

- HMIS
- △ Survey
- ◇ Population study

Data Sources

- HMIS-DHIS2 (28wks)
- HMIS-DHIS2 (1000g)
- △ Maternal Health Survey 2017 (DHS) (PH) (28wks)
- △ Demographic and Health Survey 2014 (DHS) (RC) (28wks)
- △ Demographic and Health Survey 2008 (DHS) (RC) (28wks)
- △ Maternal Health Survey 2007 (DHS) (PH) (28wks)
- △ Demographic and Health Survey 2003 (DHS) (RC) (28wks)
- △ Ha 2012 (24wks)
- ◇ AMANHI 2018 (28wks)
- ◇ Kirkwood 2010 (28wks)
- ◇ Edmond 2008 (28wks)
- ◇ Waiswa (28wks)

# Guinea

### Available Data

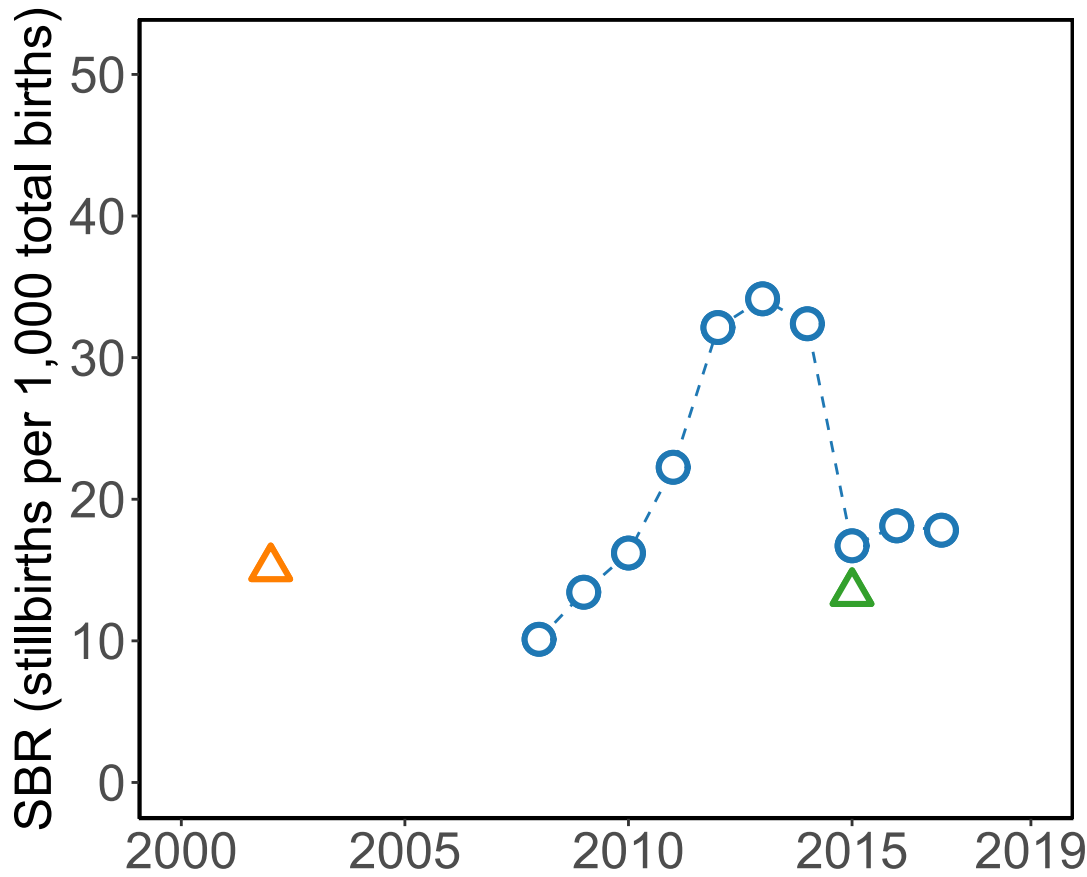

### '28+ Weeks of Gestation' Data (Incl. Adjusted Data)

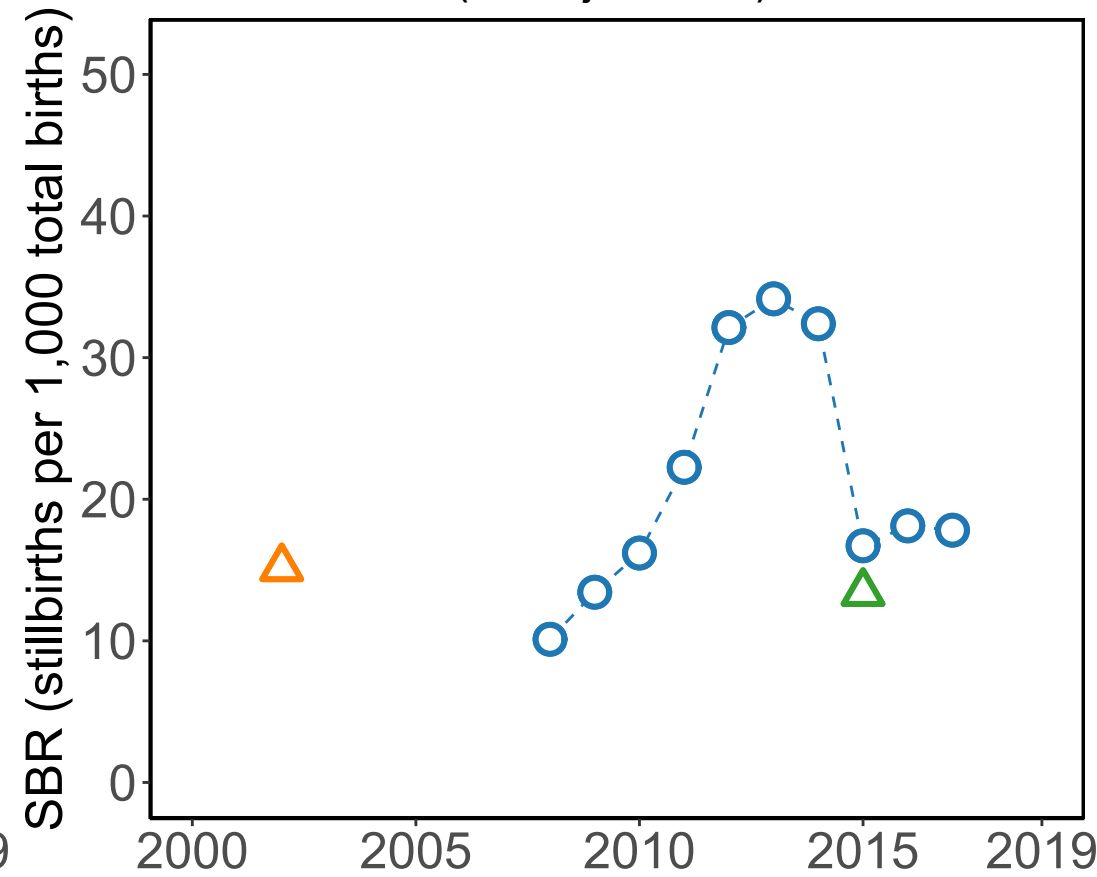

### Data Included in the Model

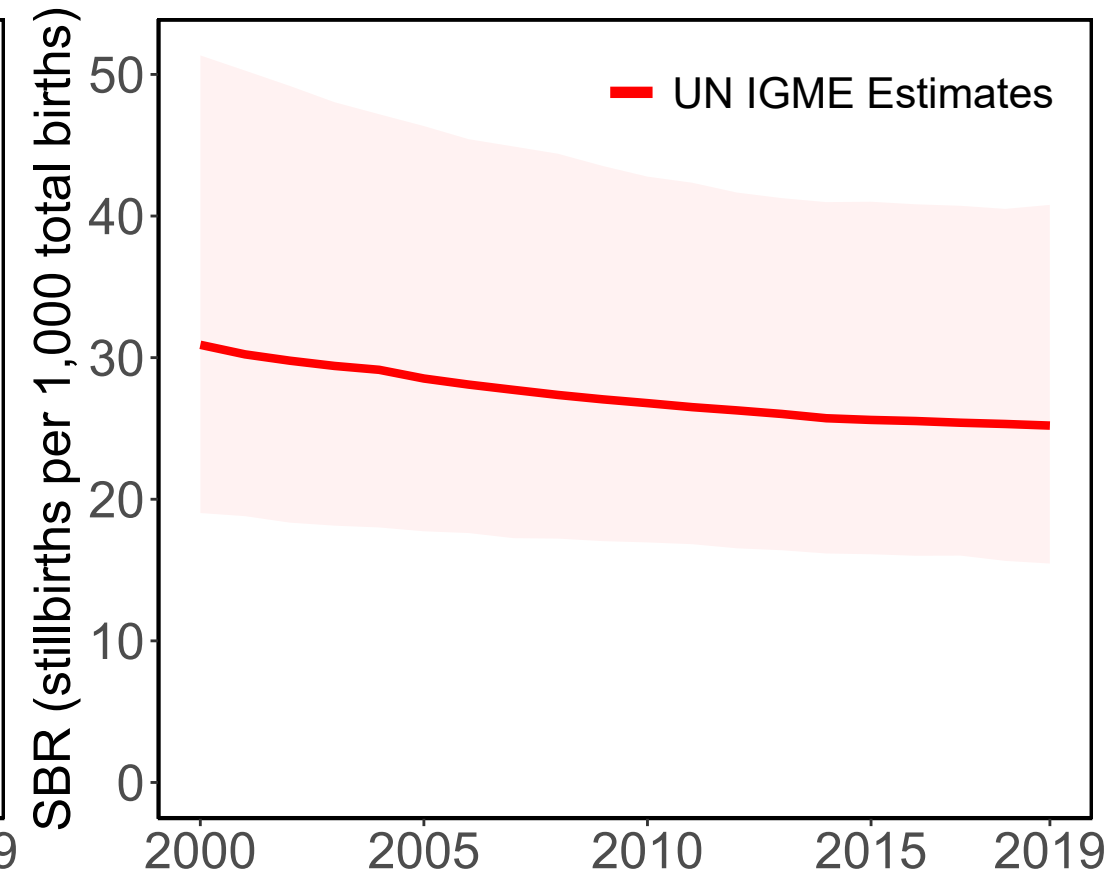

#### Source Types

○ HMIS △ Survey

#### Data Sources

○ HMIS-DHIS2 (28wks)

△ Guinea 2018 Demographic and Health Survey 2018 (DHS) (RC) (28wks)

△ Enquête démographique et de santé 2005 (DHS) (RC) (28wks)

— UN IGME Estimates

# Gambia

### Available Data

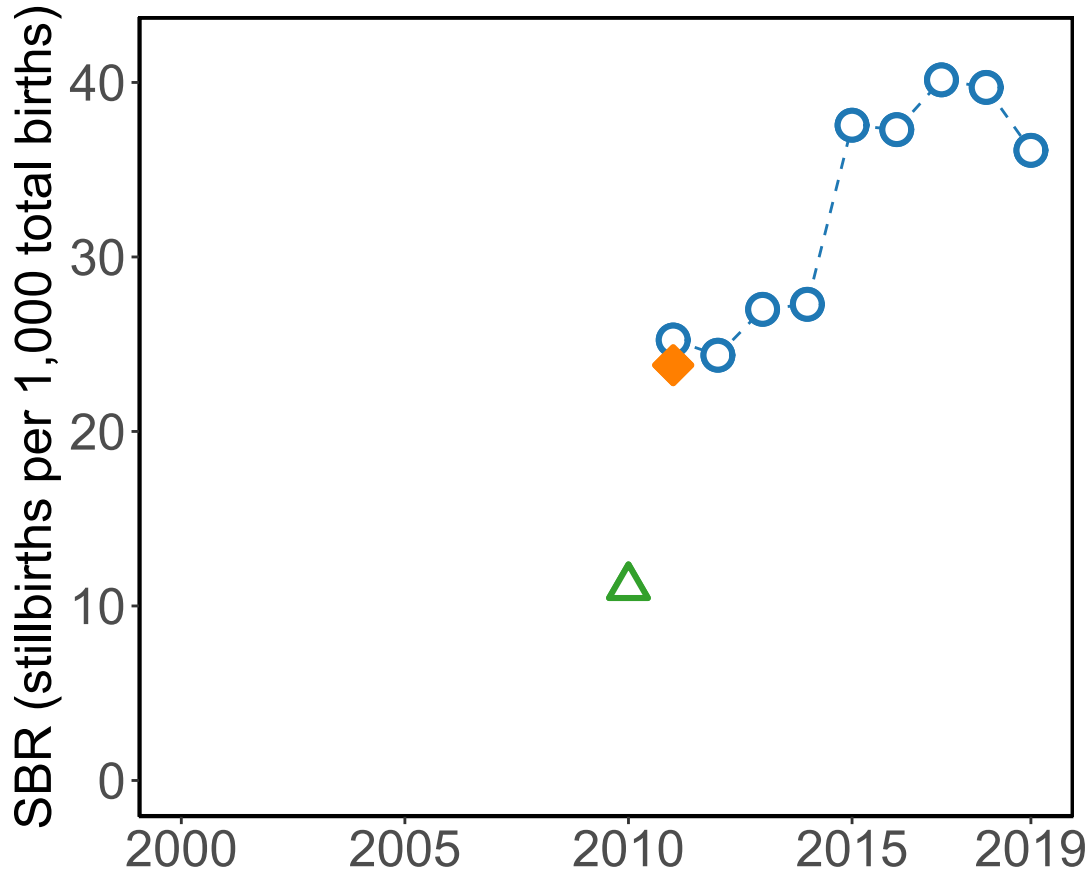

### '28+ Weeks of Gestation' Data (Incl. Adjusted Data)

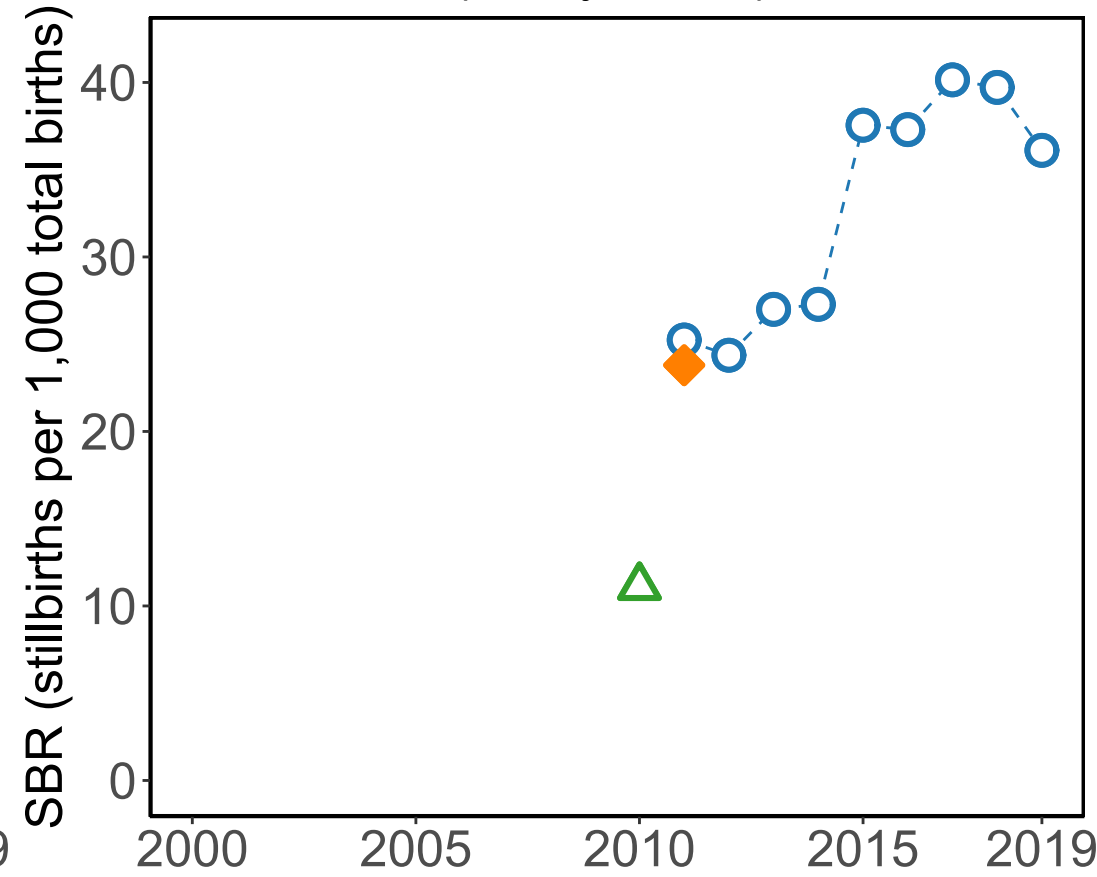

### Data Included in the Model

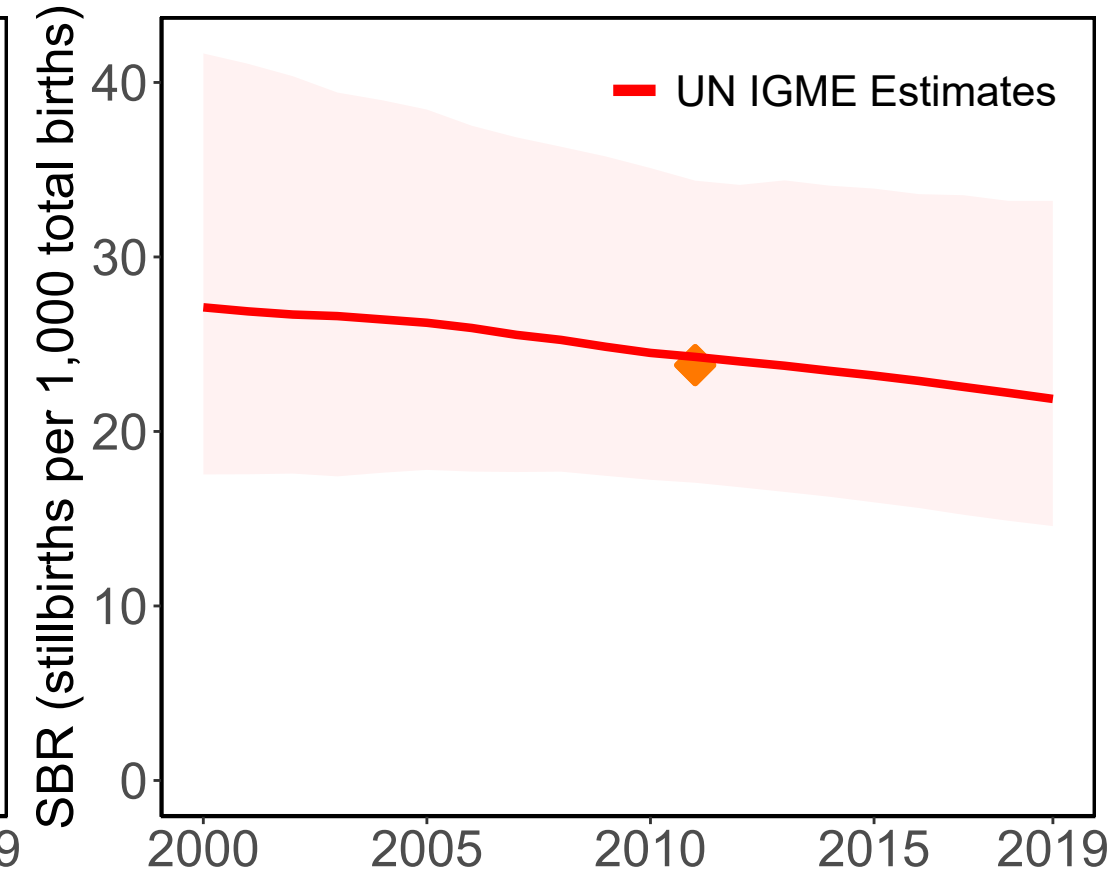

#### Source Types

○ HMIS △ Survey ◇ Population study

#### Data Sources

○ HMIS-DHIS2 (28wks)

△ Demographic and Health Survey 2013 (DHS) (RC) (28wks)

◇ Waiswa (28wks)

# Guinea-Bissau

## Available Data

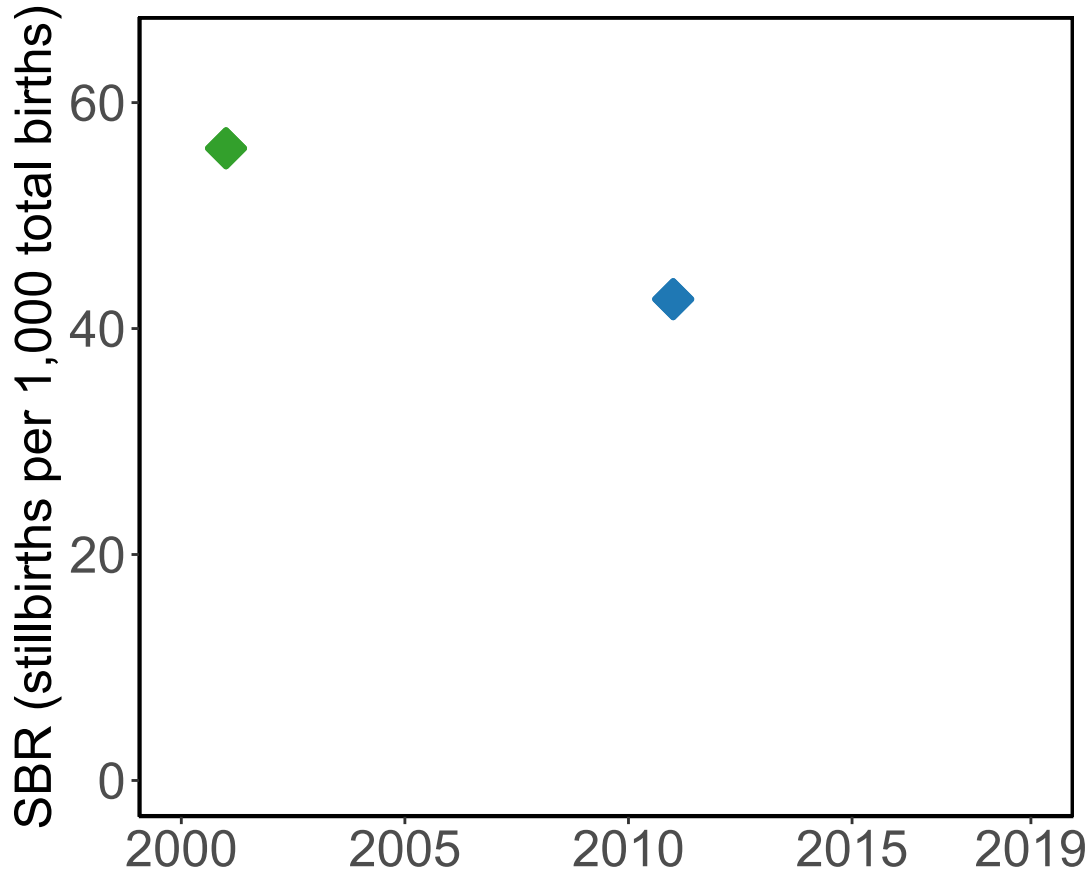

## '28+ Weeks of Gestation' Data (Incl. Adjusted Data)

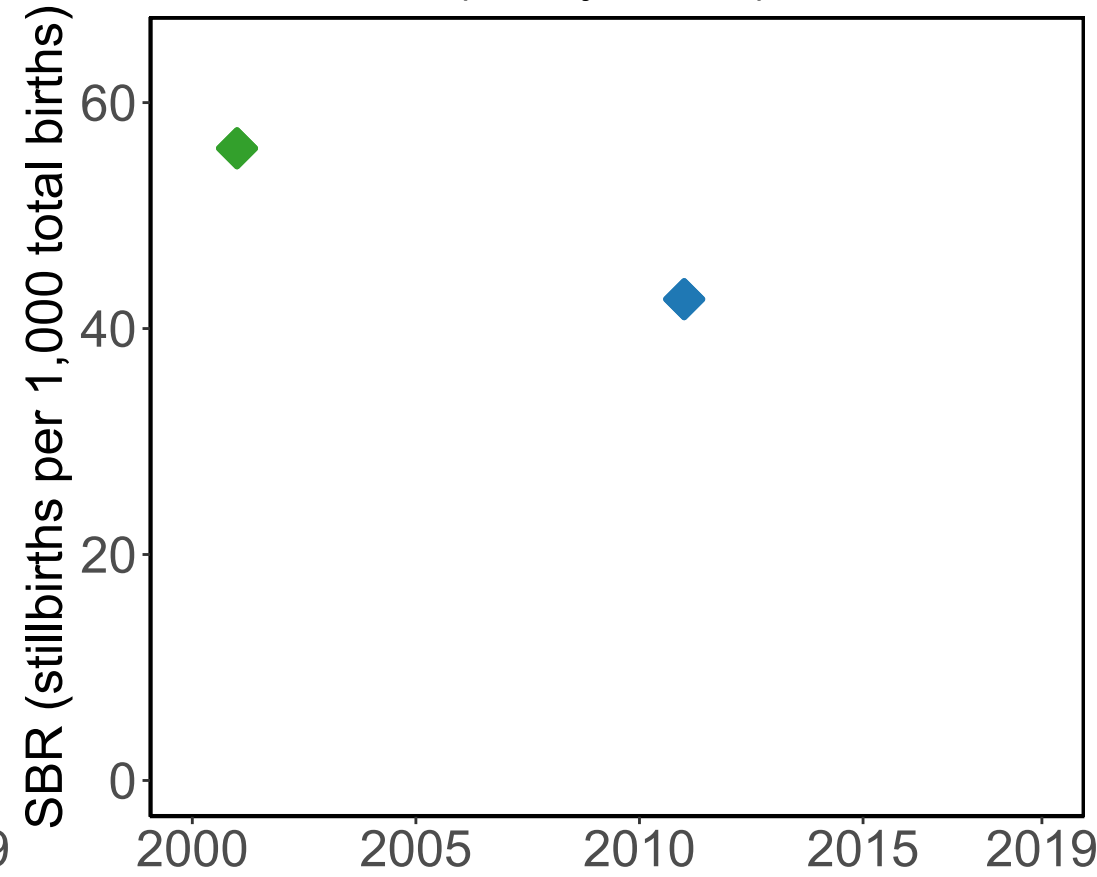

## Data Included in the Model

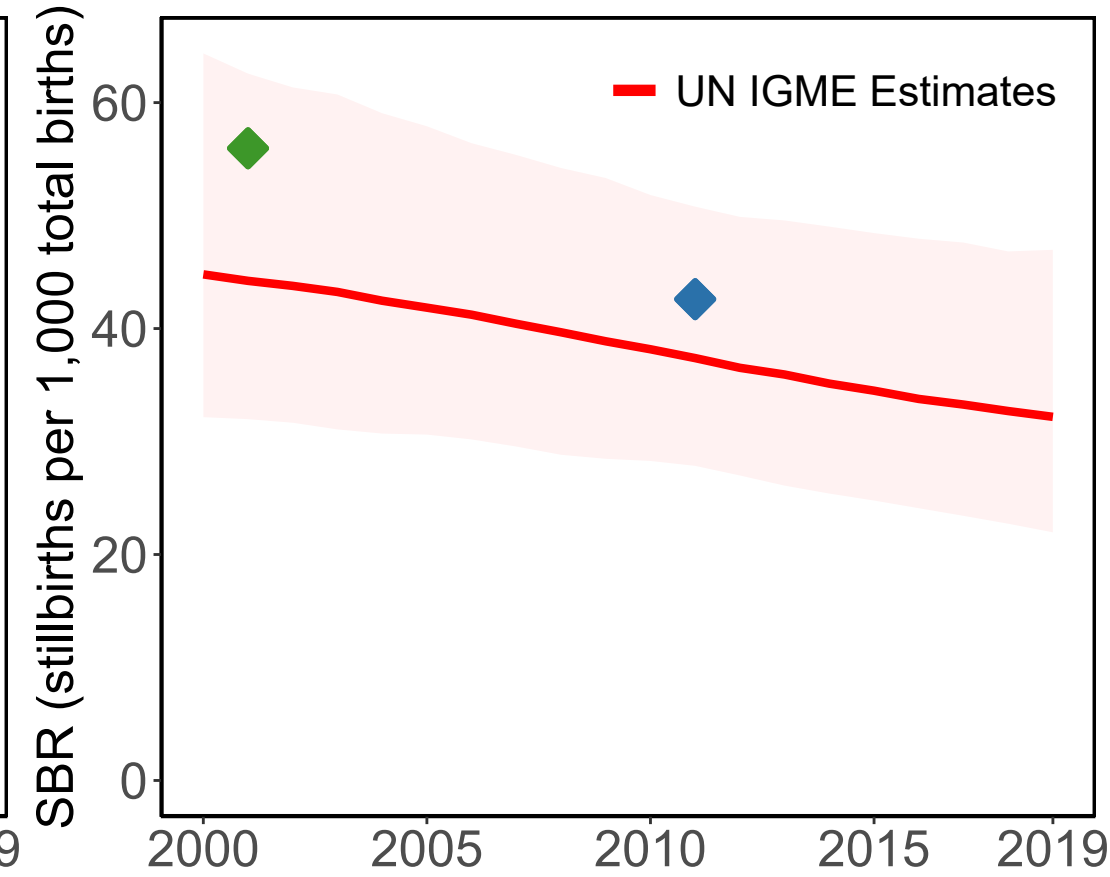

### Source Types

◇ Population study

### Data Sources

◇ Waiswa (28wks)

◇ Kaestrel 2005 (28wks)

# Equatorial Guinea

### Available Data

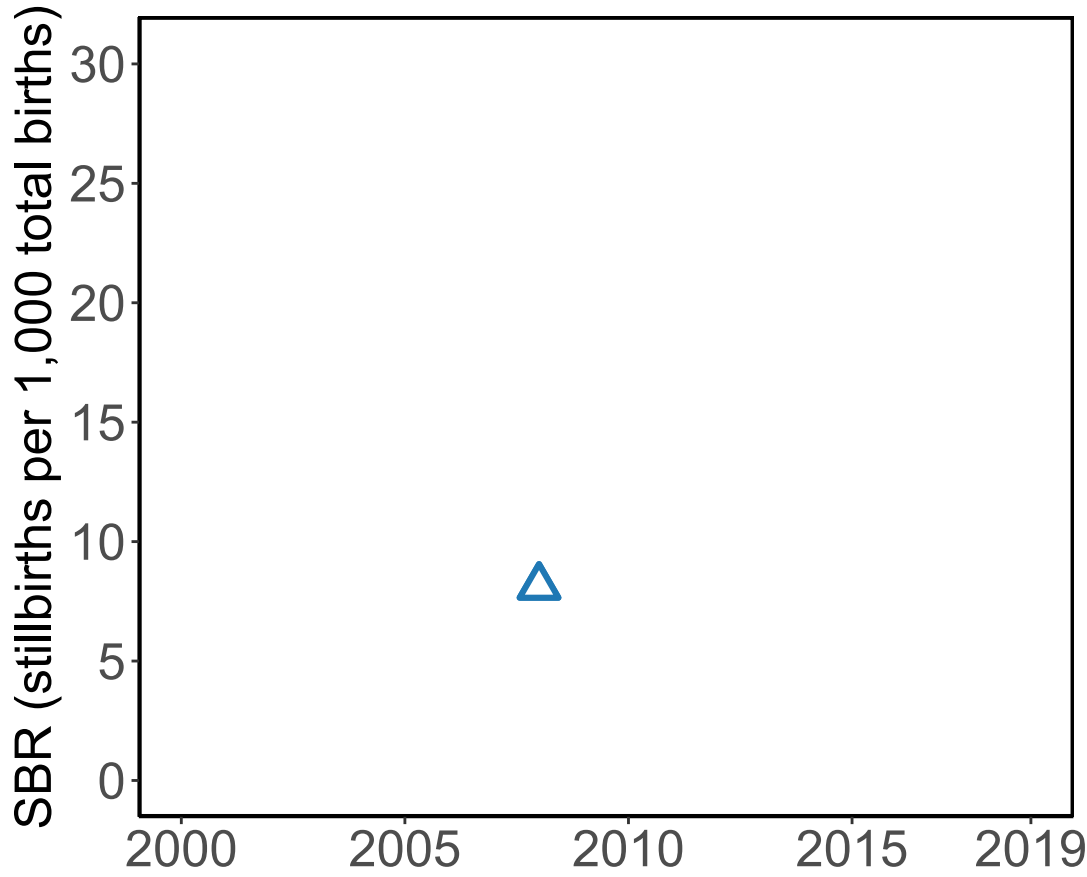

### '28+ Weeks of Gestation' Data (Incl. Adjusted Data)

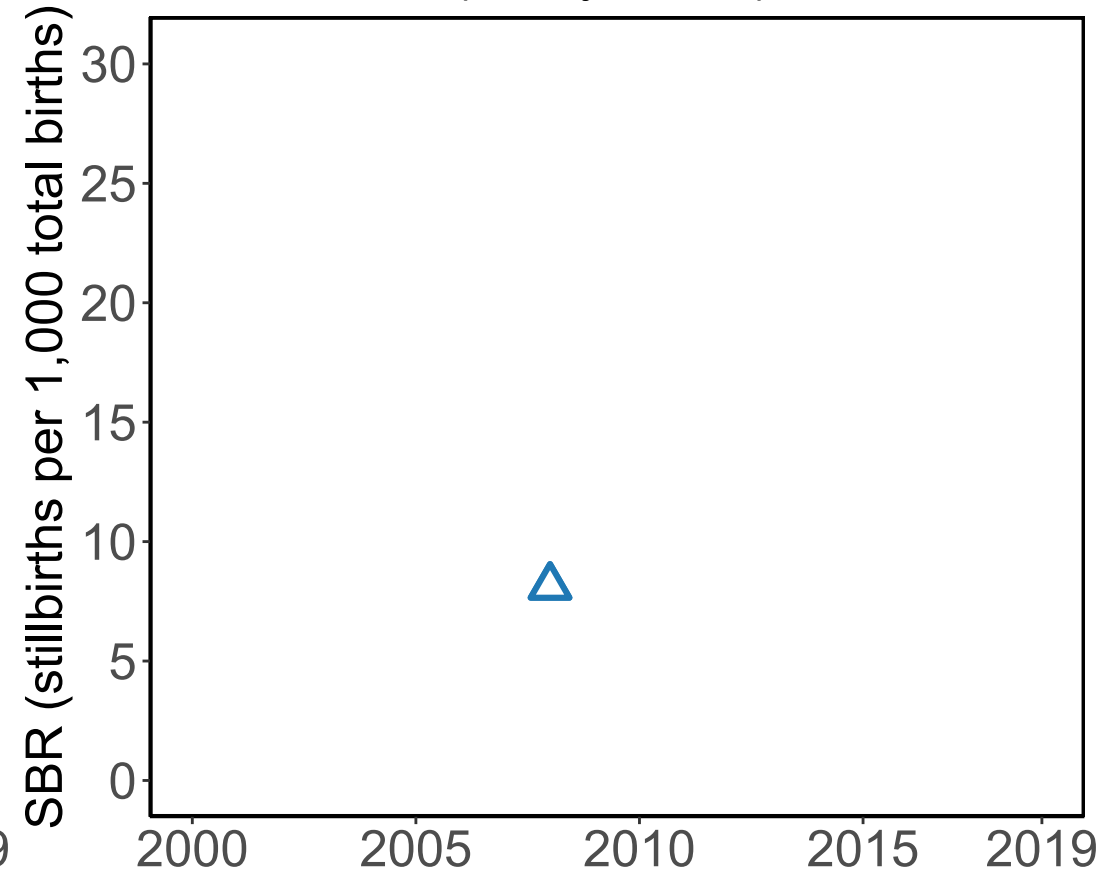

### Data Included in the Model

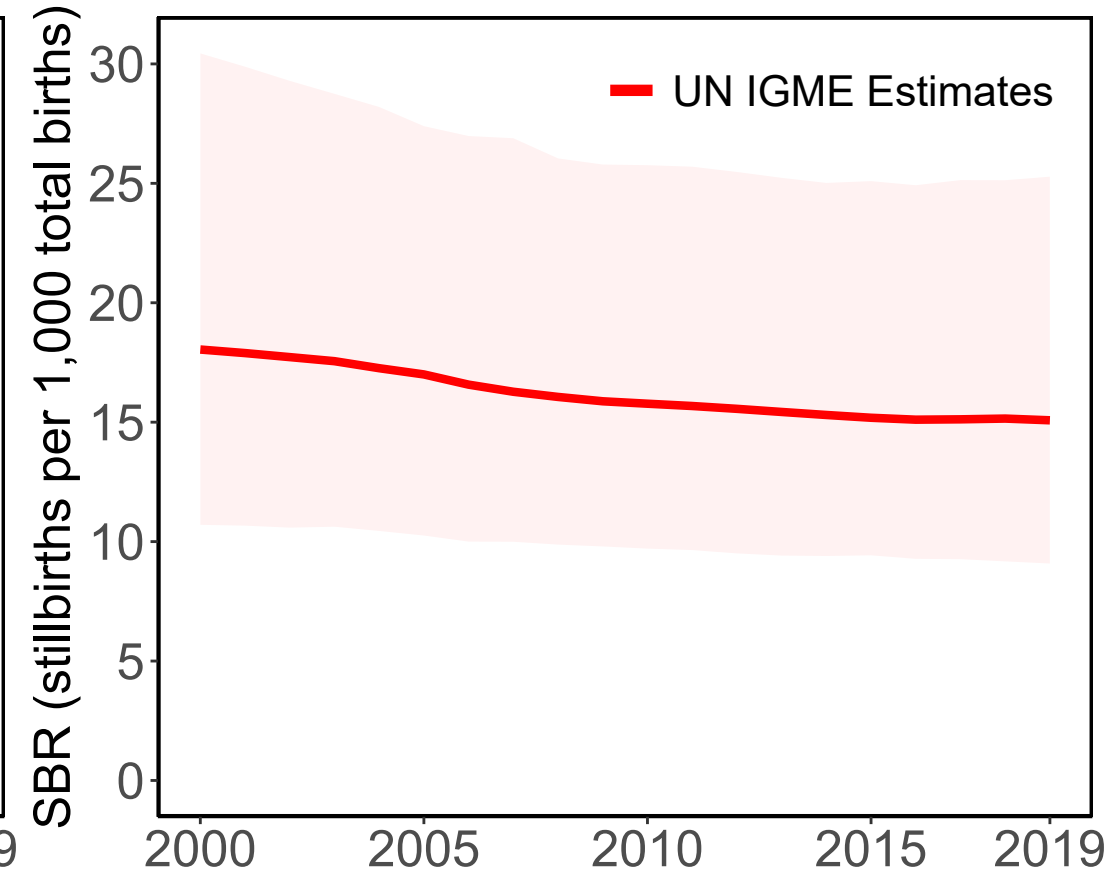

#### Source Types



Survey

#### Data Sources

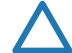

Demographic and Health Survey 2011 (DHS)  
(RC) (28wks)



# Greece

### Available Data

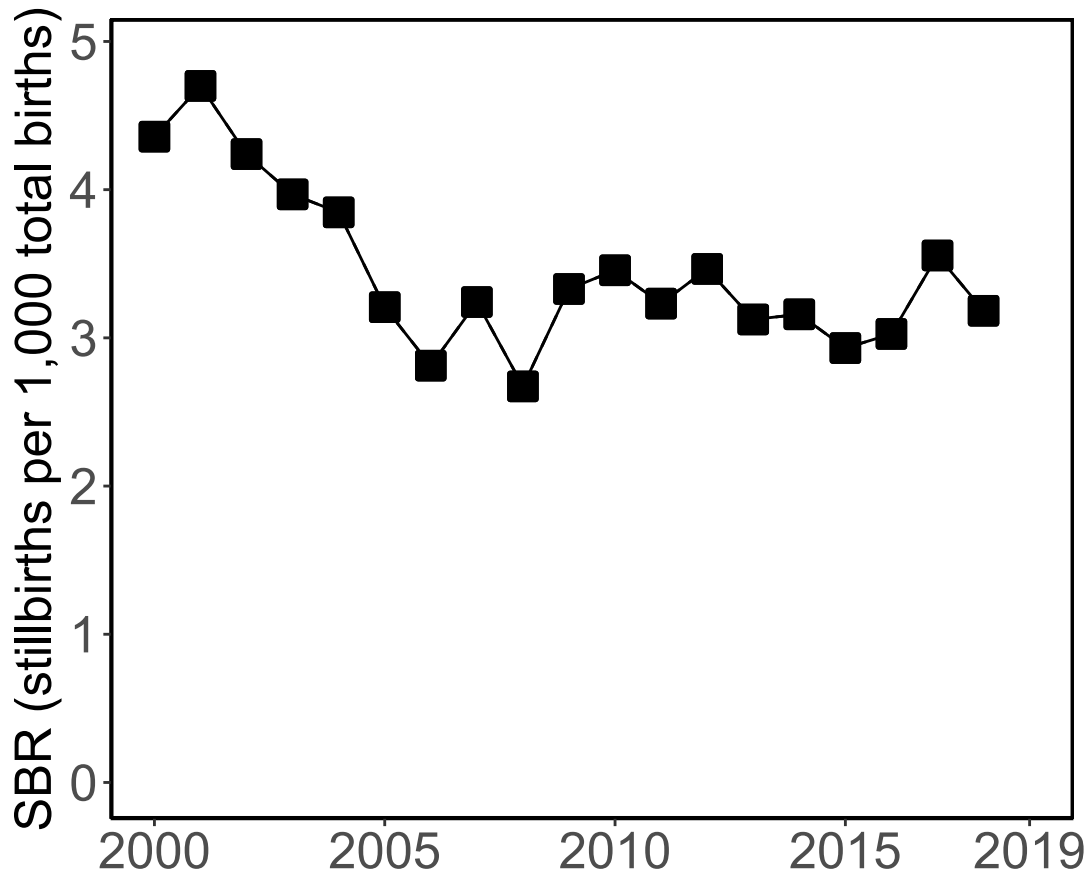

### '28+ Weeks of Gestation' Data (Incl. Adjusted Data)

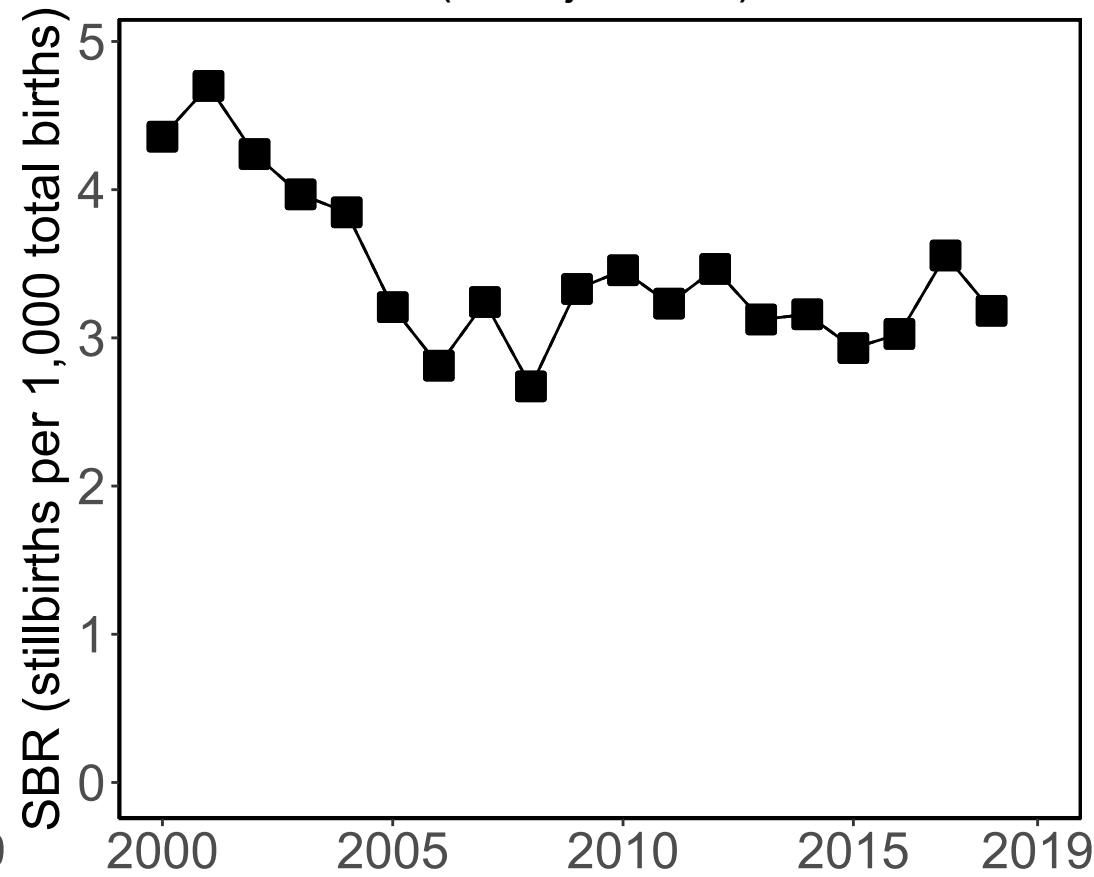

### Data Included in the Model

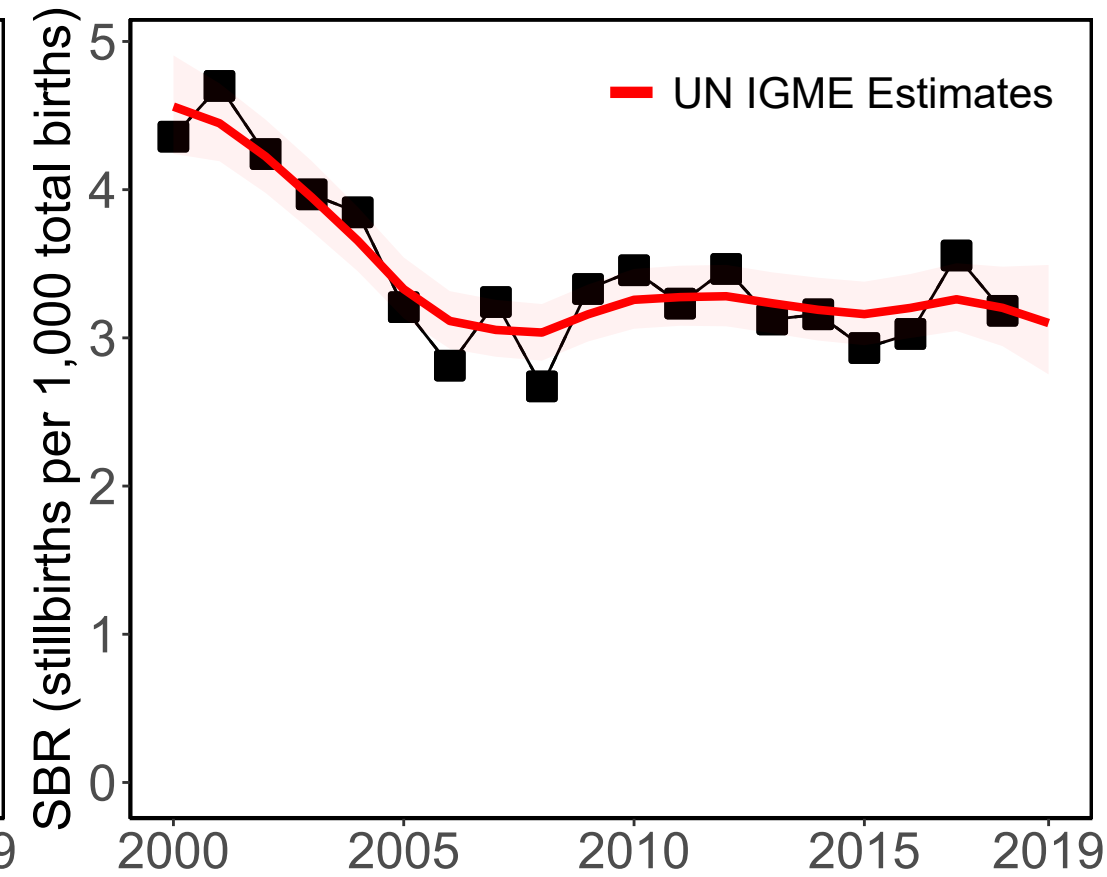

#### Source Types

□ Administrative

#### Data Sources

■ Vital Registration (28wks)

# Grenada

### Available Data

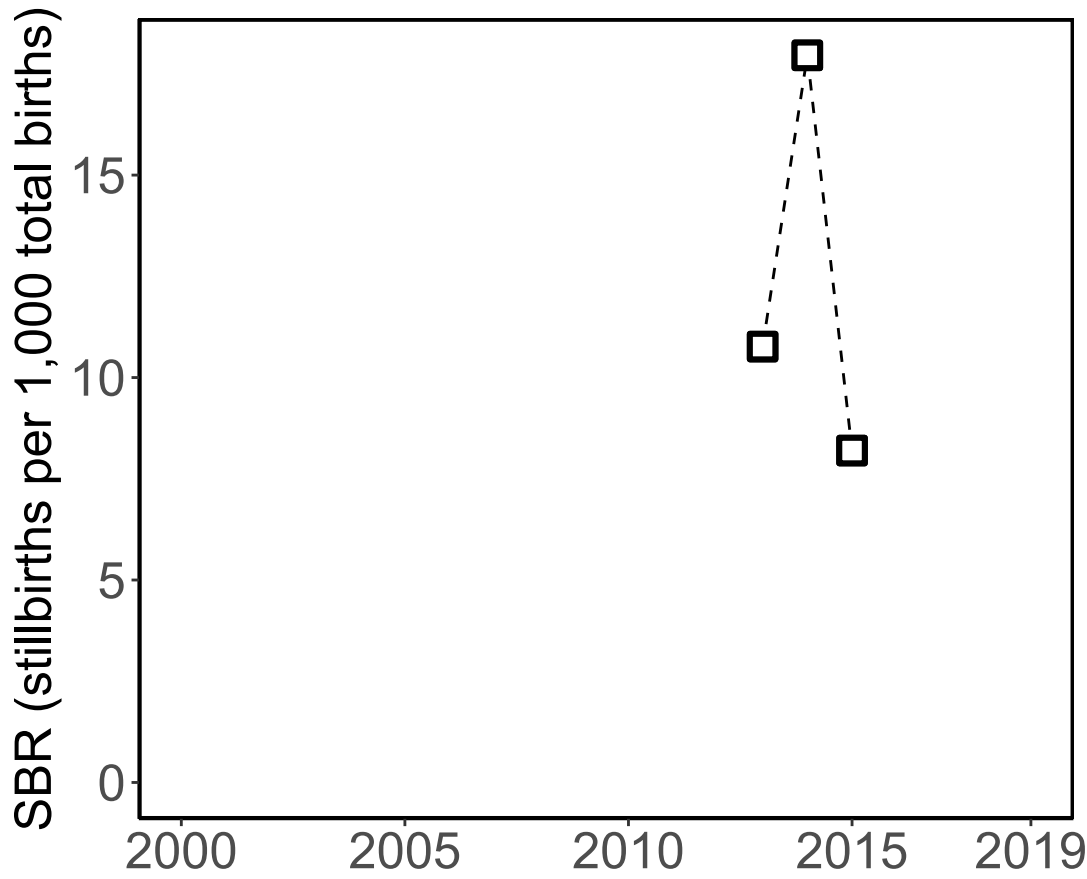

### '28+ Weeks of Gestation' Data (Incl. Adjusted Data)

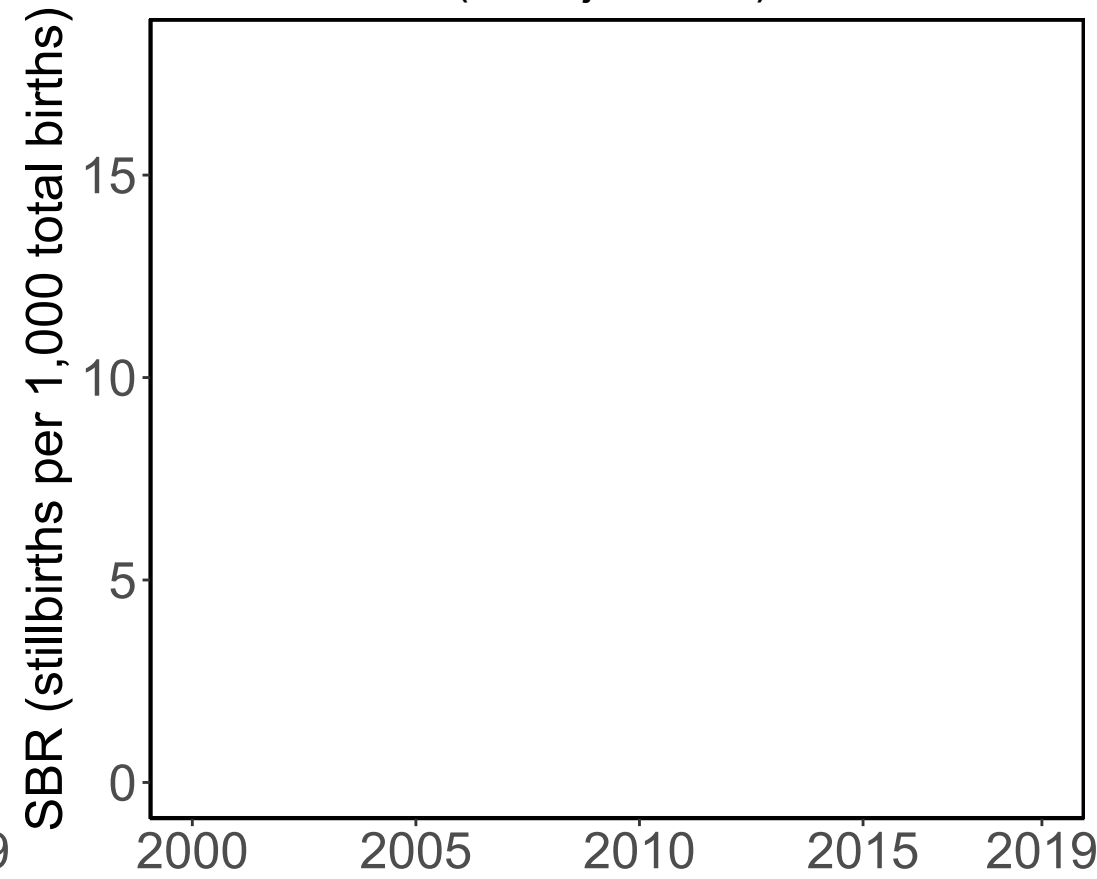

### Data Included in the Model

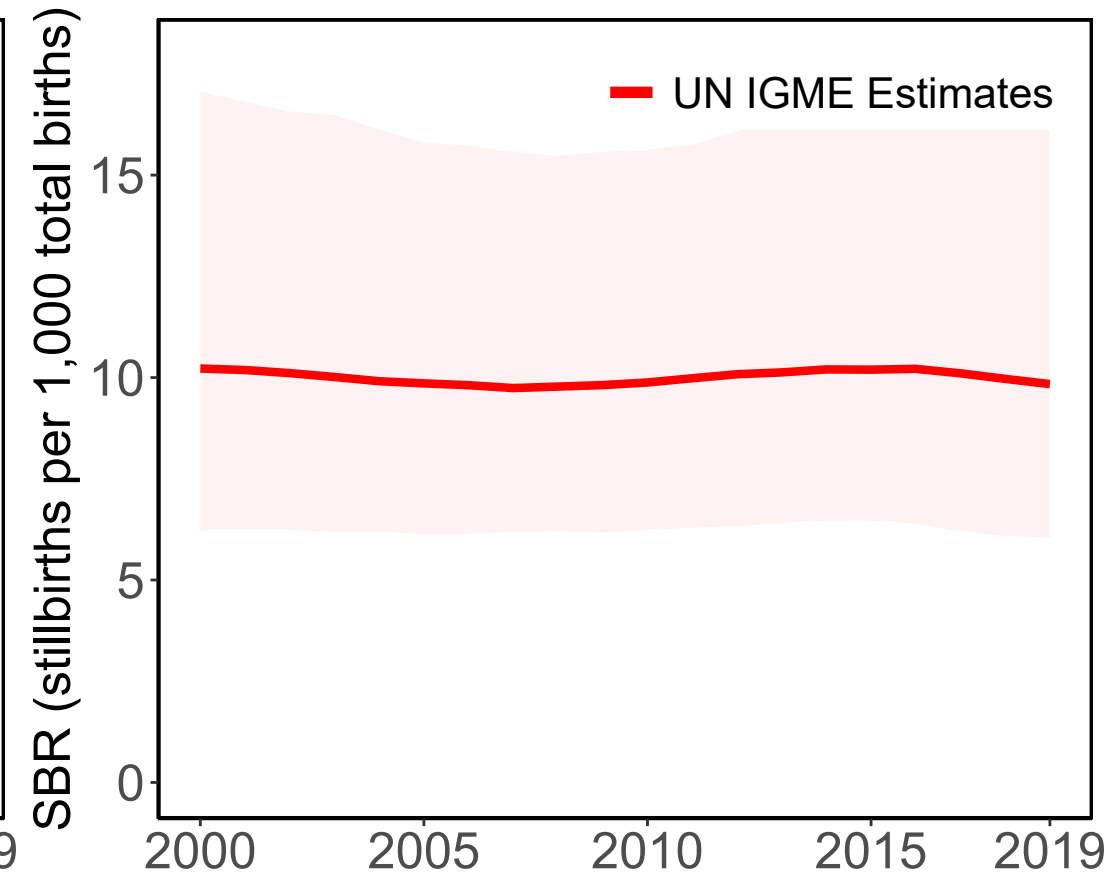

#### Source Types

□ Administrative

#### Data Sources

□ Vital Registration (any gestational age or birthweight)

# Guatemala

Available Data

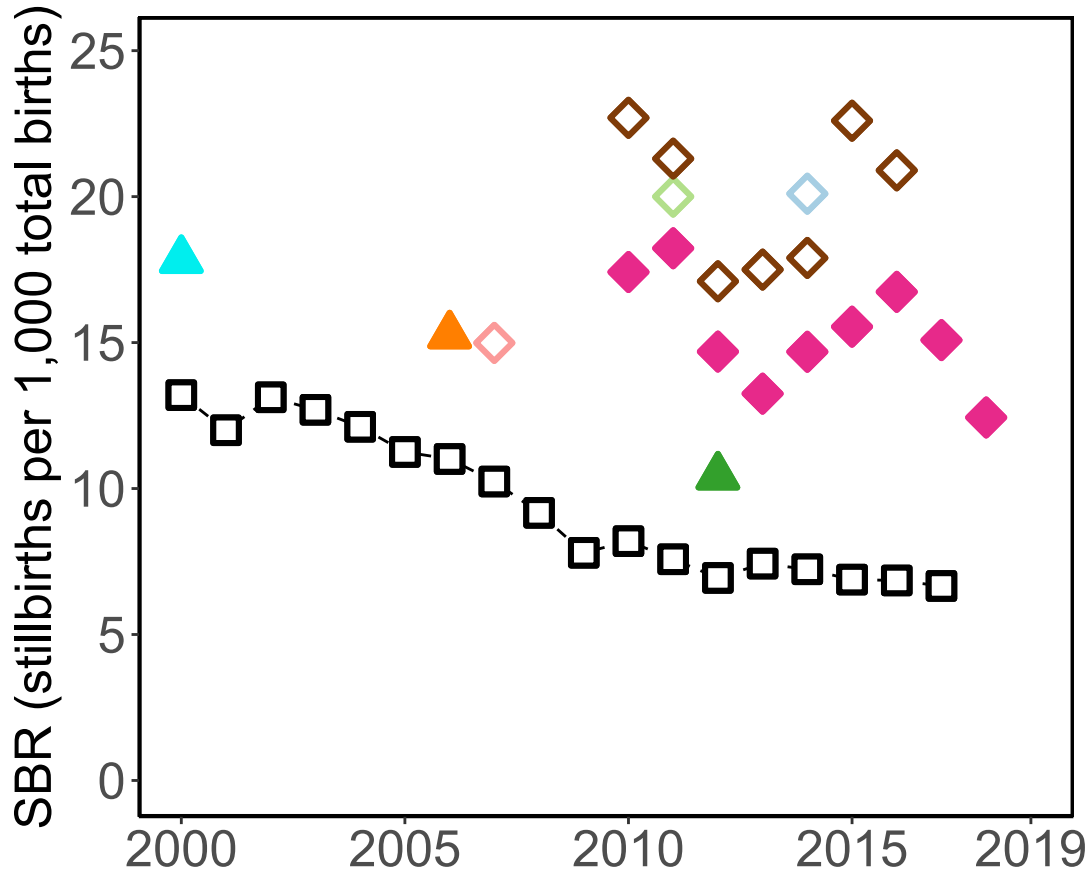

'28+ Weeks of Gestation' Data  
(Incl. Adjusted Data)

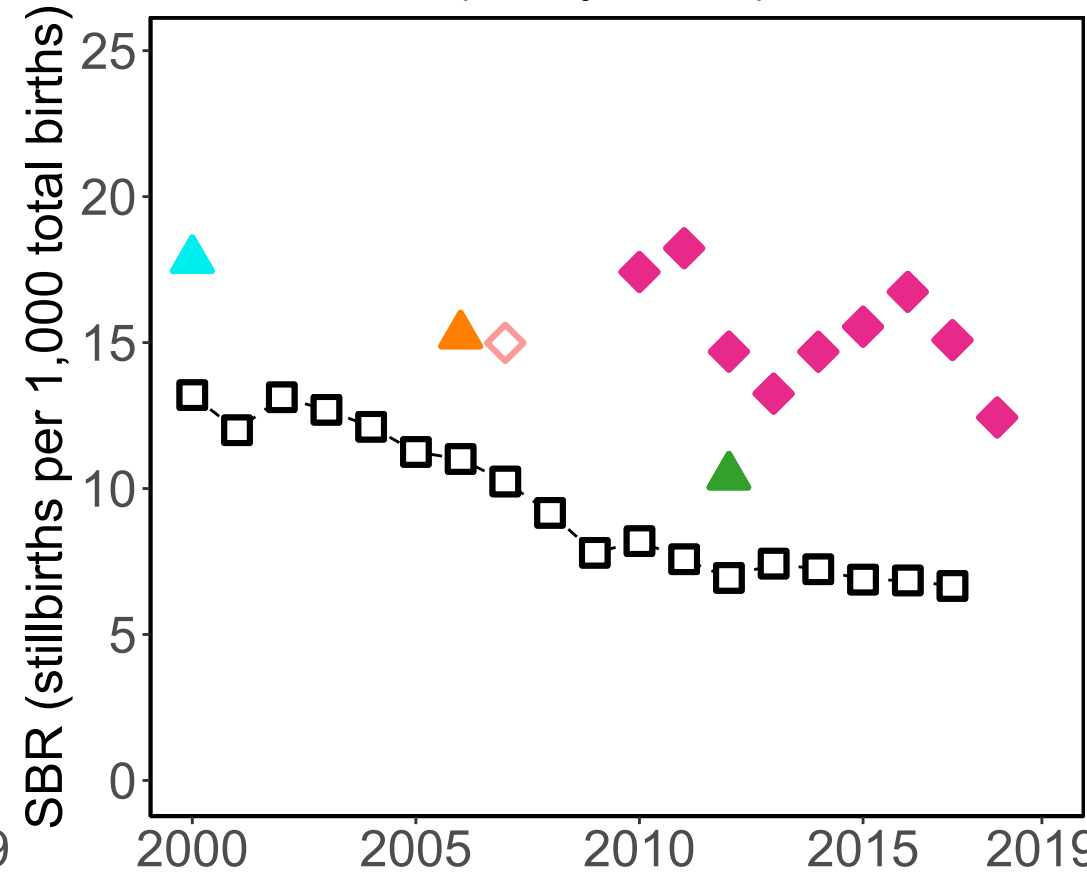

Data Included in the Model

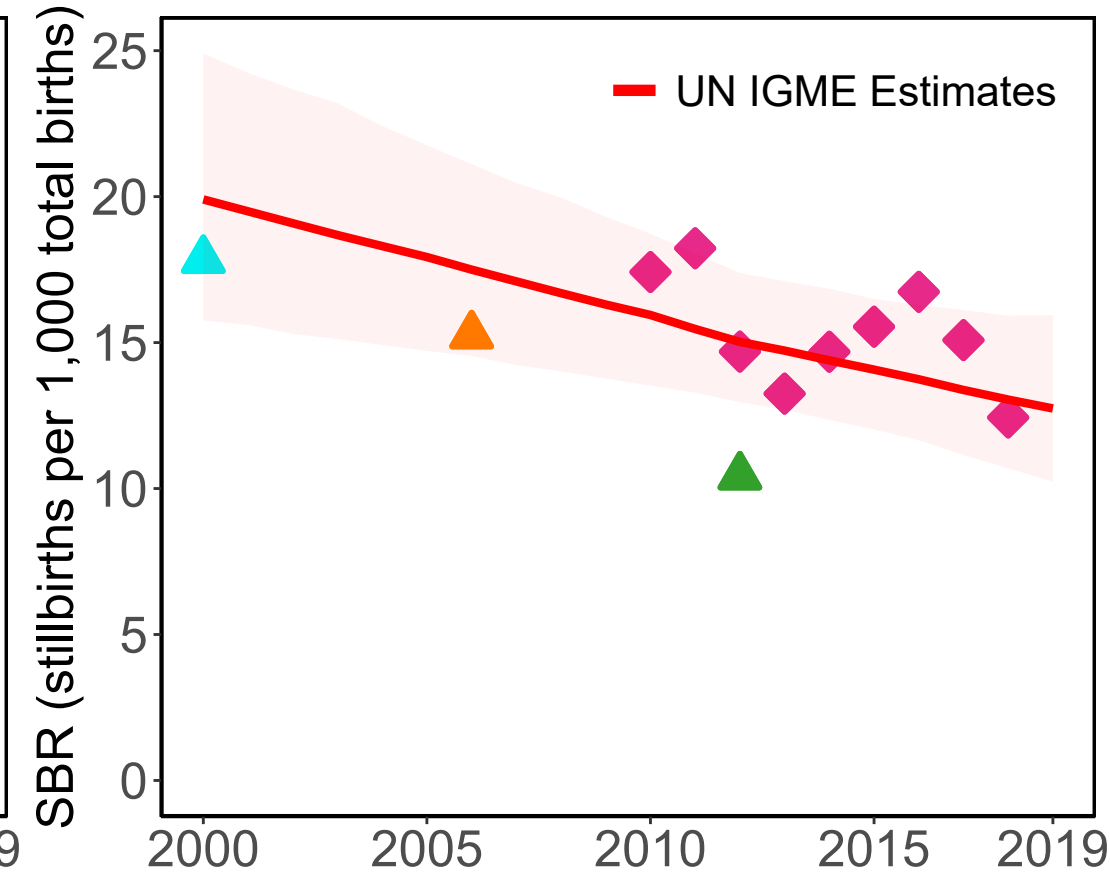

Source Types

- Administrative
- Survey
- Population study

Data Sources

- Vital Registration (28wks)
- Encuesta Nacional de Salud Materno Infantil 2002 (RHS) (RC) (28wks)
- Saleem 2018 (500g or 20wks)
- Encuesta Nacional de Salud Materno Infantil 2014-15 (DHS) (RC) (28wks)
- Global Network Re-analysed (28wks)
- Saleem 2014 (1000g and 28wks)
- Encuesta Nacional de Salud Materno Infantil 2008-09 (RHS) (RC) (28wks)
- McClure 2018 (500g or 20wks)
- McClure 2011 (28wks)

# Guyana

## Available Data

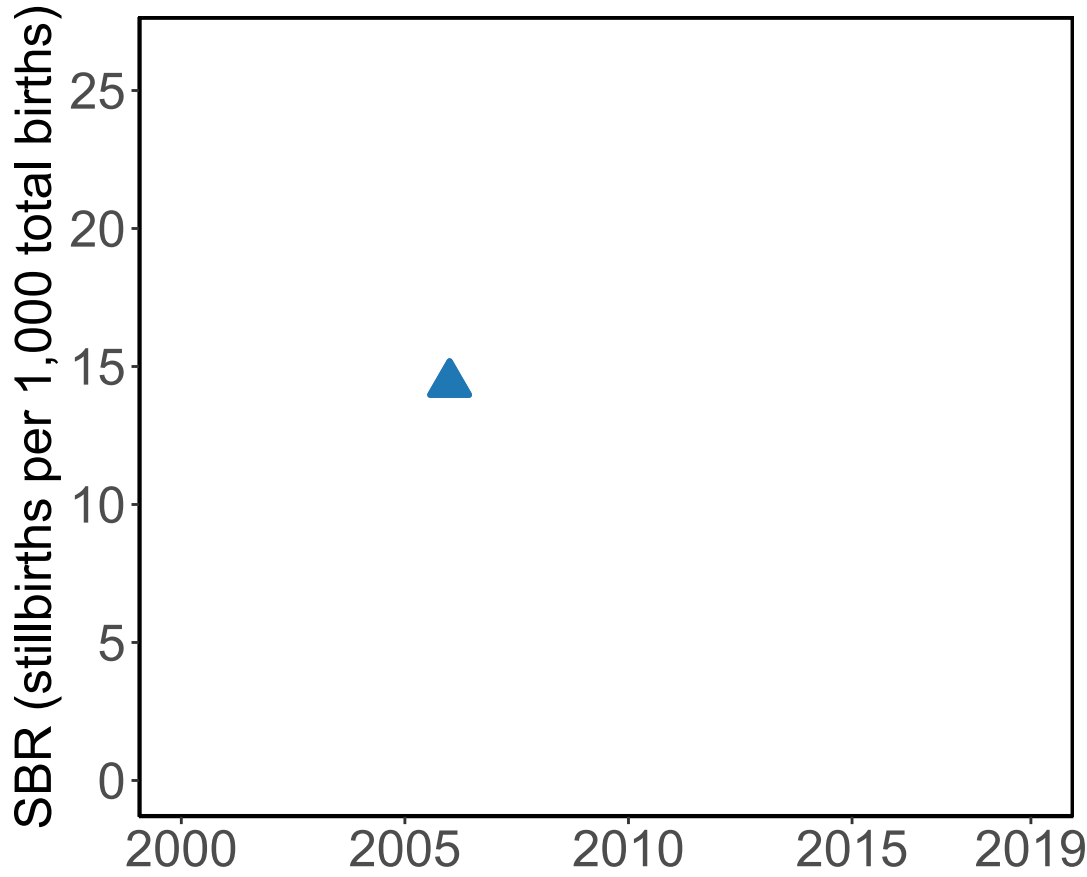

## '28+ Weeks of Gestation' Data (Incl. Adjusted Data)

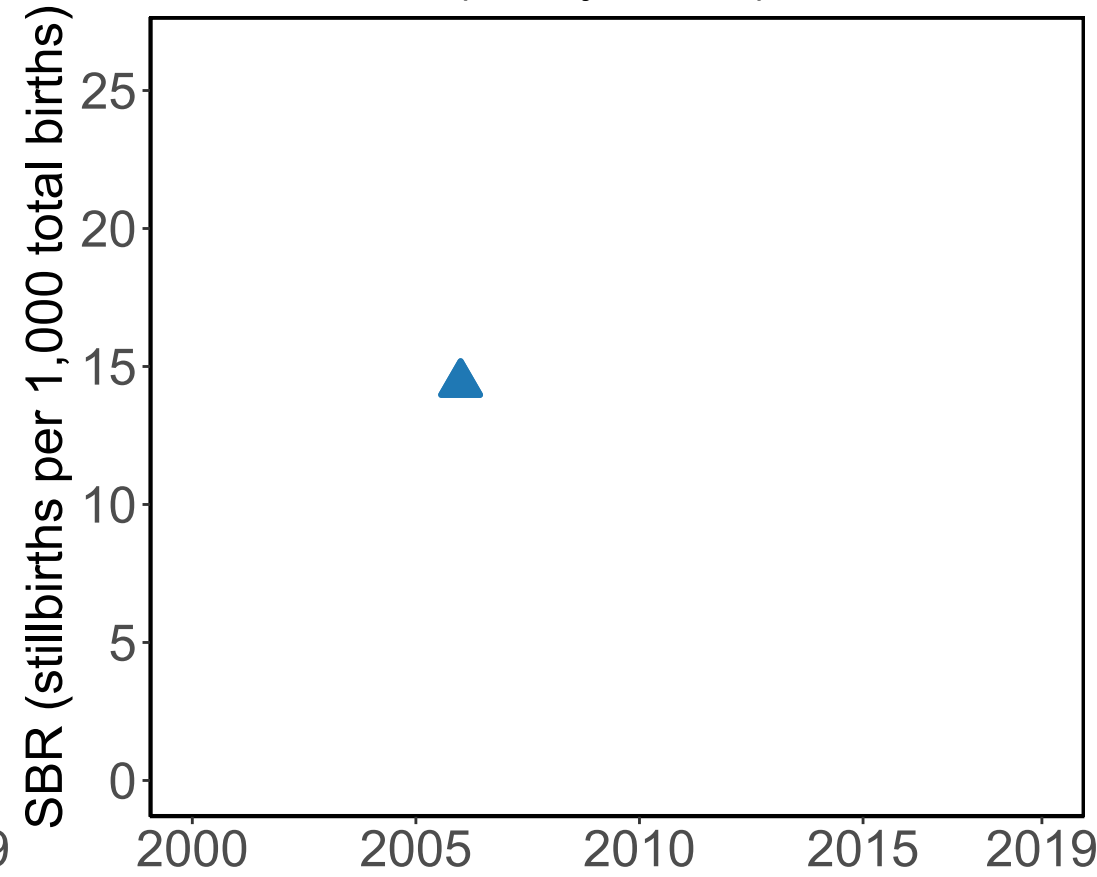

## Data Included in the Model

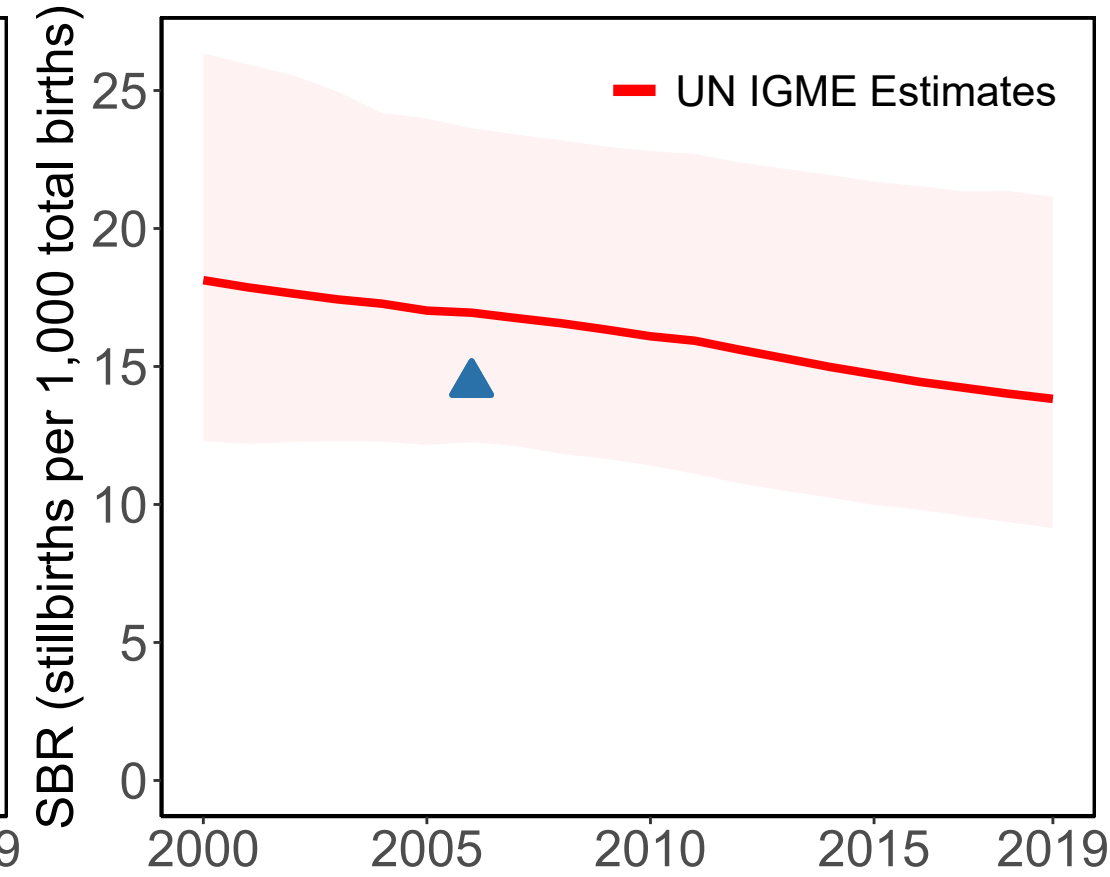

### Source Types



### Data Sources

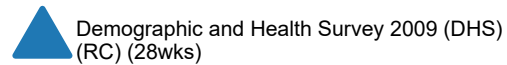

# Honduras

### Available Data

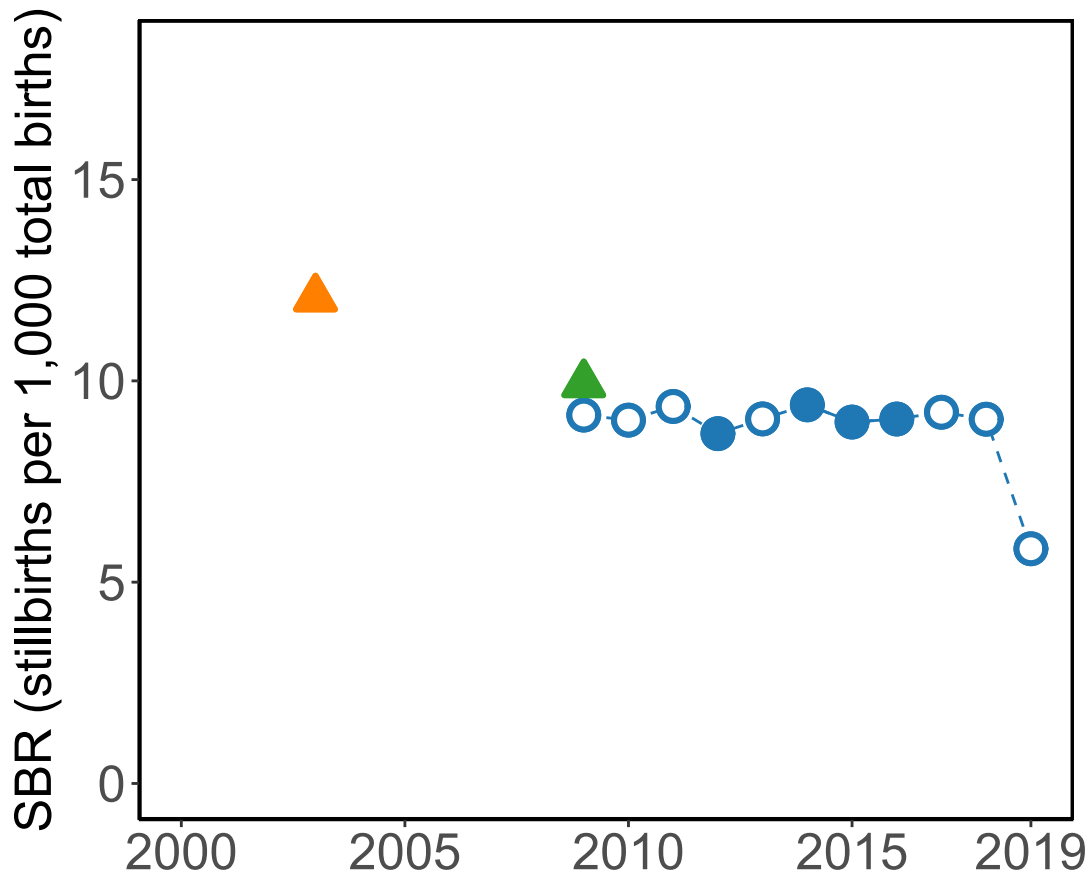

### '28+ Weeks of Gestation' Data (Incl. Adjusted Data)

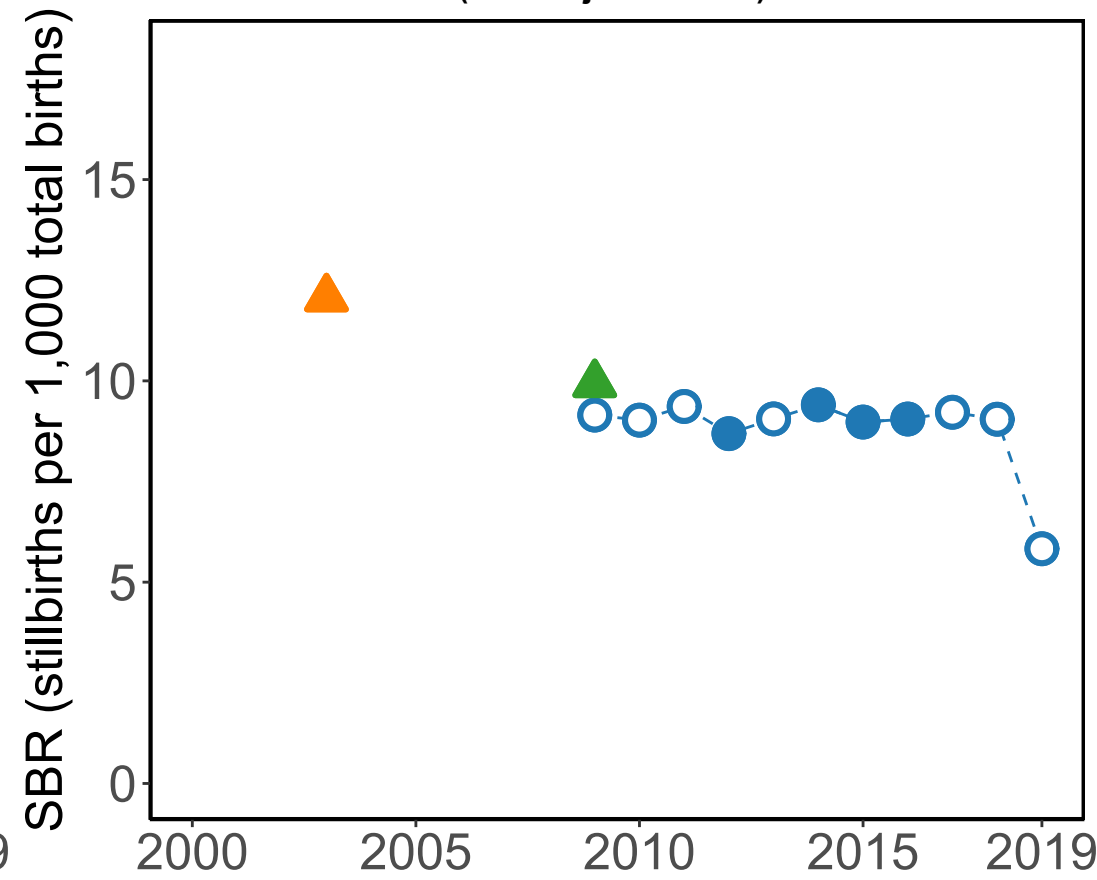

### Data Included in the Model

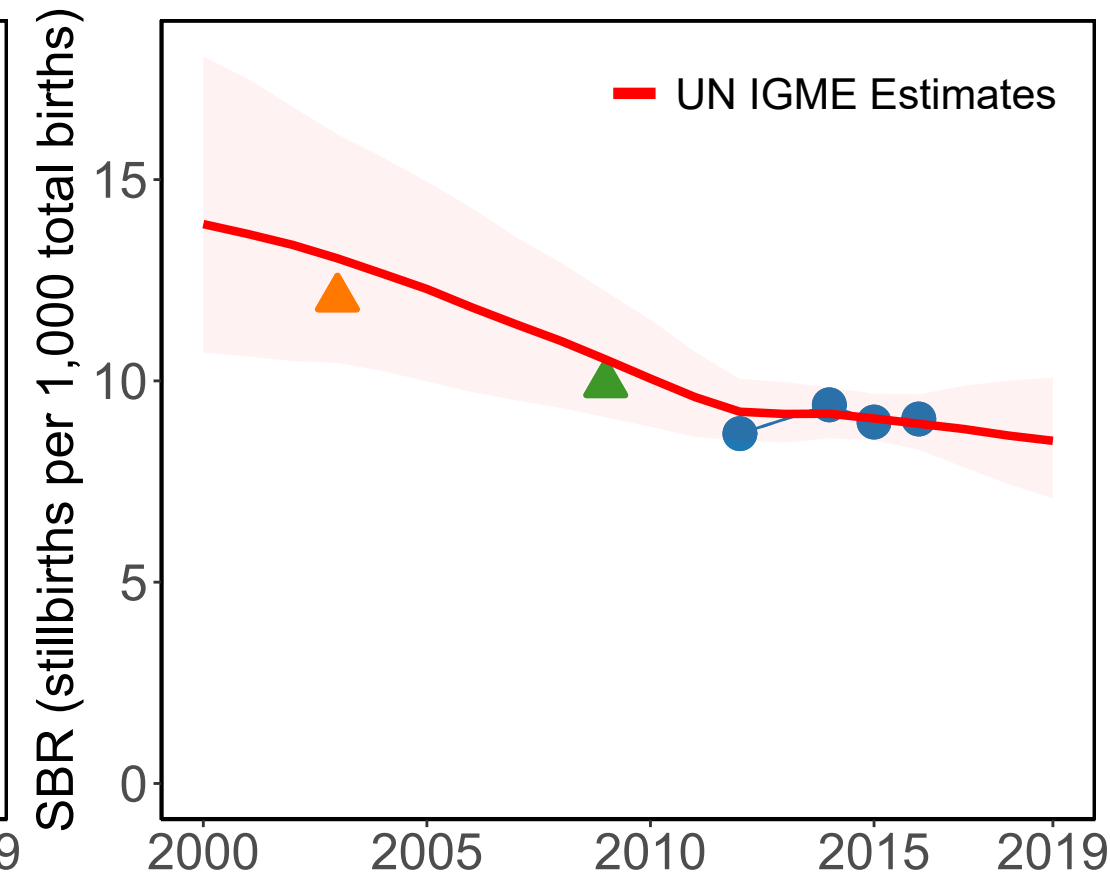

#### Source Types

○ HMIS   △ Survey

#### Data Sources

● HMIS-DHIS2 (28wks)

▲ Encuesta Nacional de Demografía y Salud 2011-12 (DHS) (RC) (28wks)

▲ Encuesta Nacional de Demografía y Salud 2005-06 (DHS) (RC) (28wks)

# Croatia

### Available Data

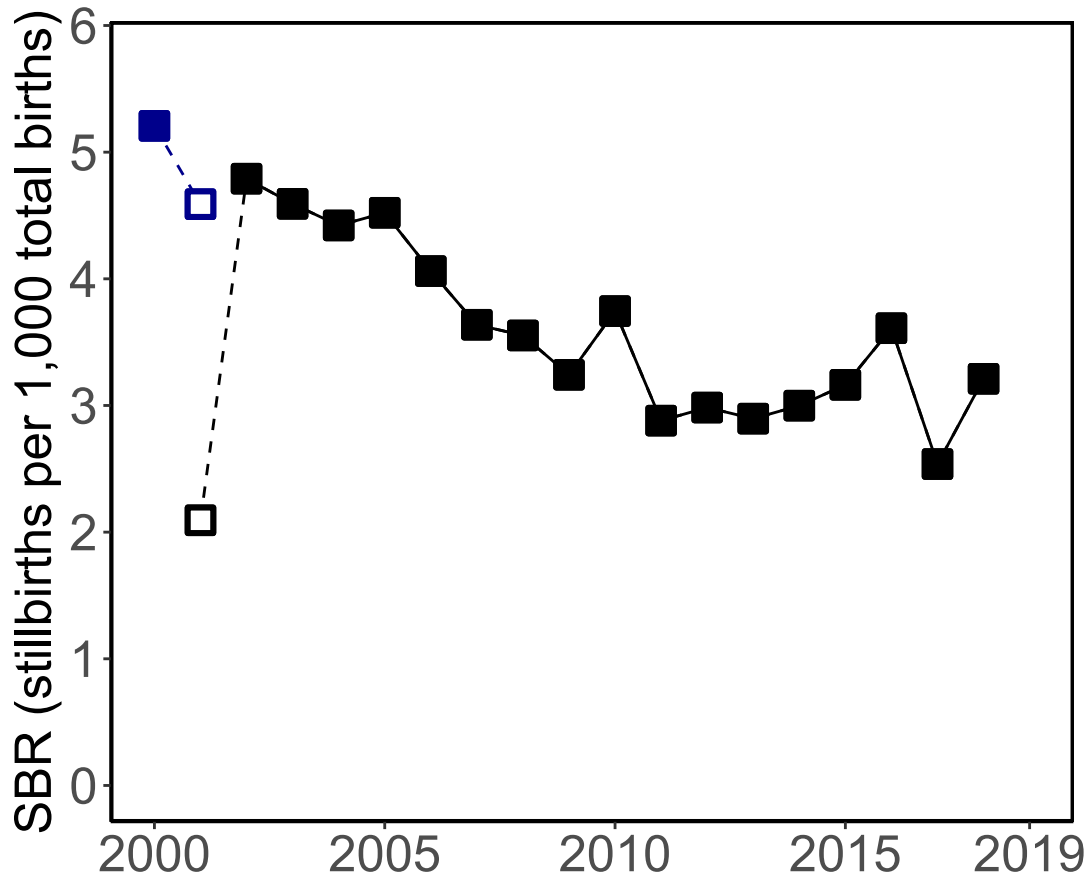

### '28+ Weeks of Gestation' Data (Incl. Adjusted Data)

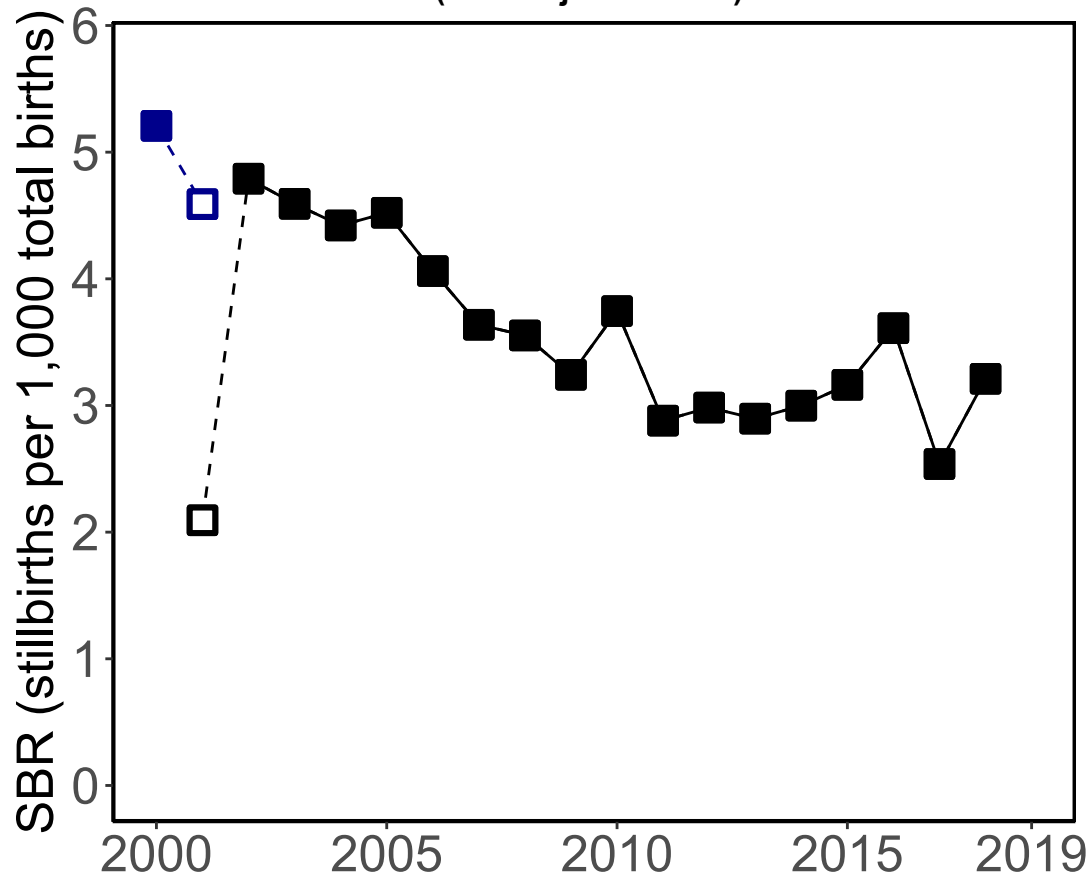

### Data Included in the Model

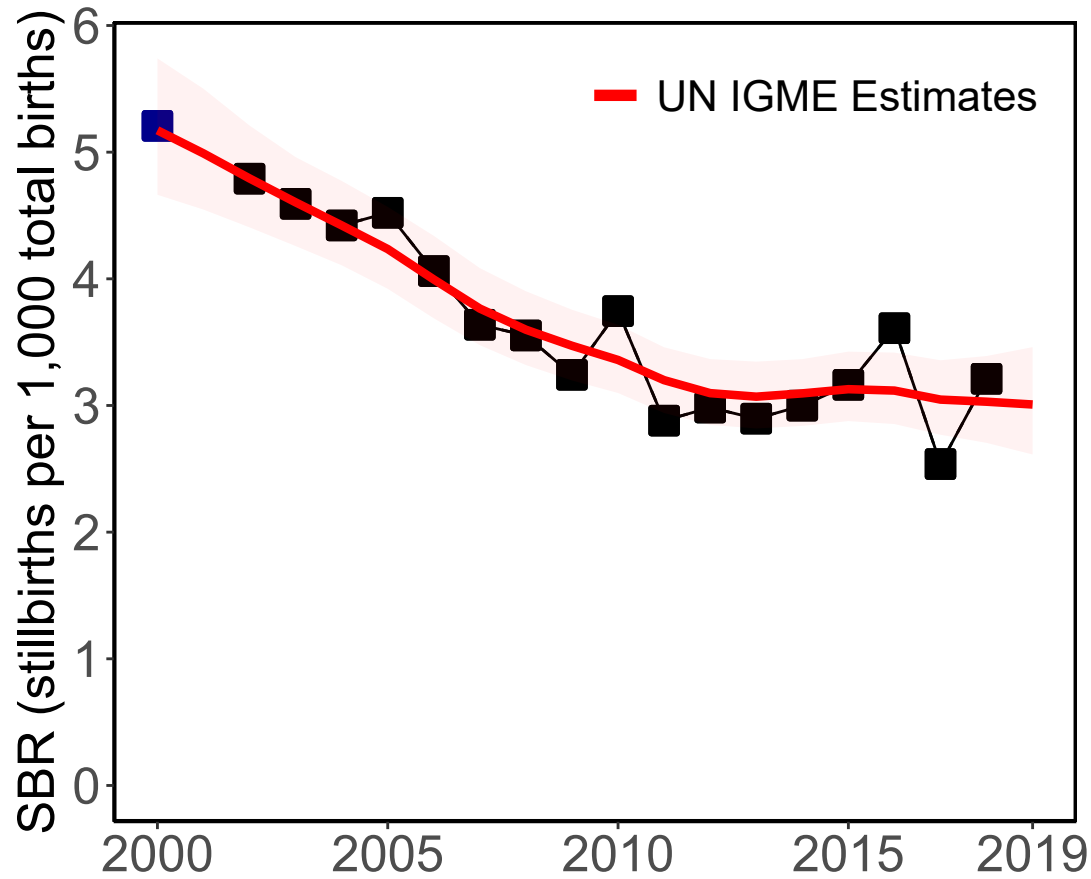

#### Source Types

□ Administrative

#### Data Sources

■ Birth or Death Registry (28wks)

■ Vital Registration (28wks)

# Haiti

Available Data

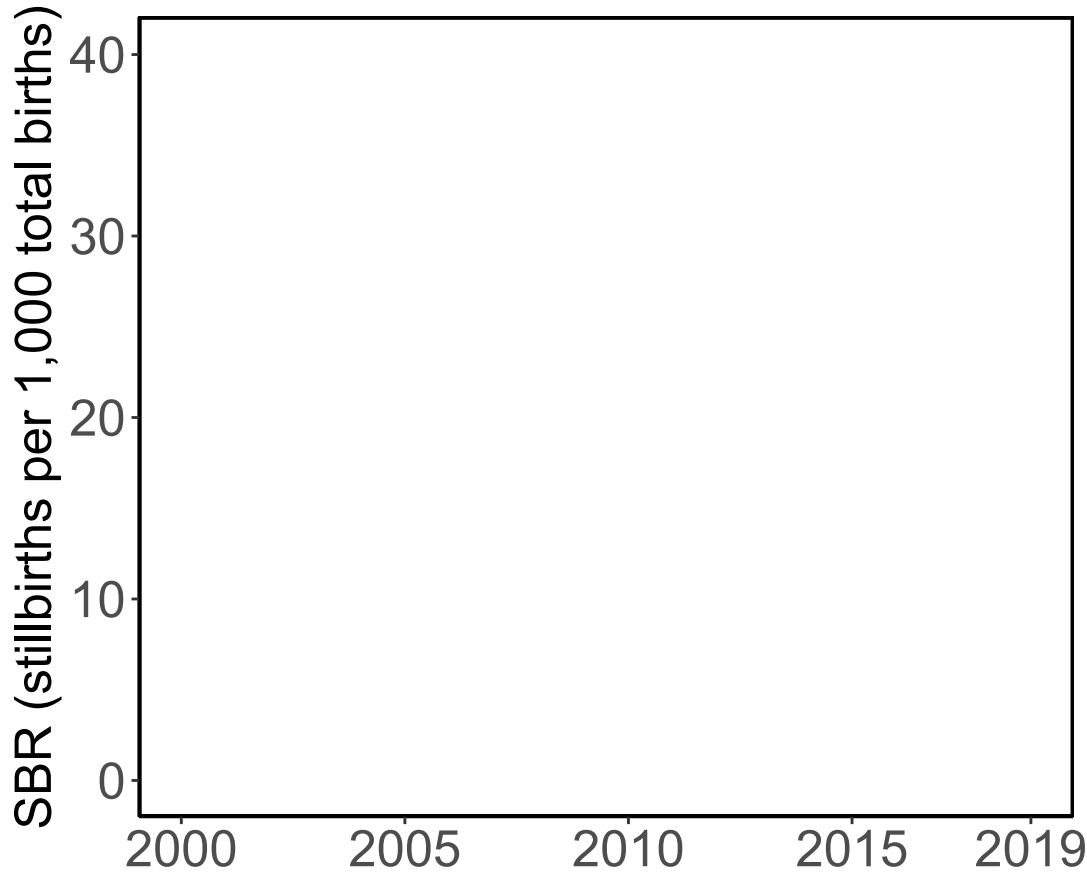

'28+ Weeks of Gestation' Data  
(Incl. Adjusted Data)

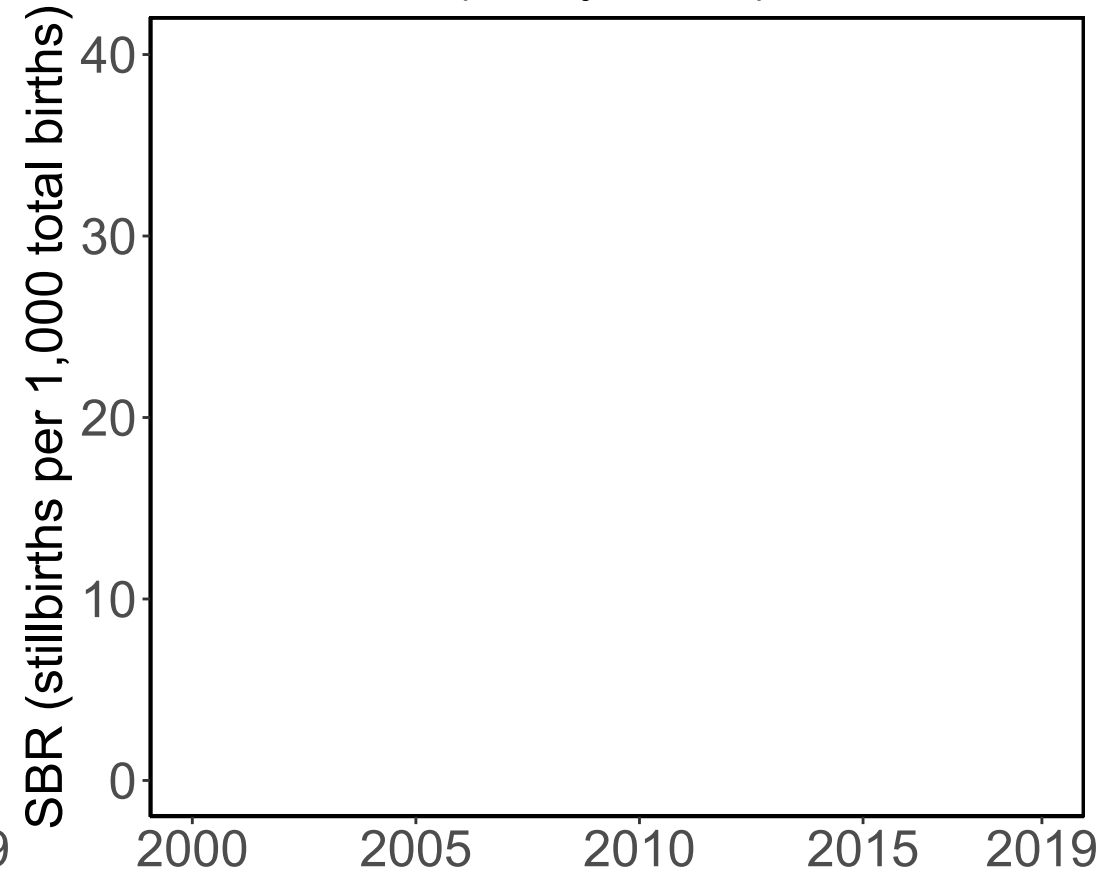

Data Included in the Model

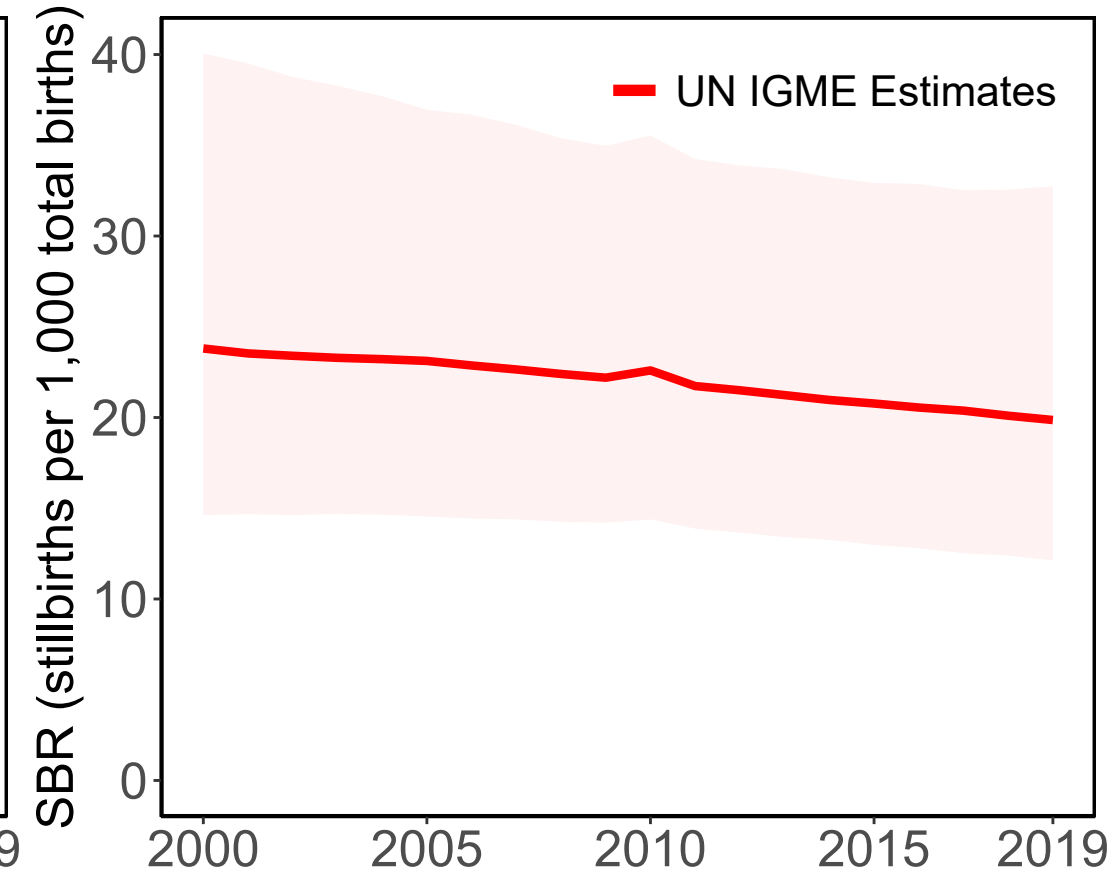

# Hungary

### Available Data

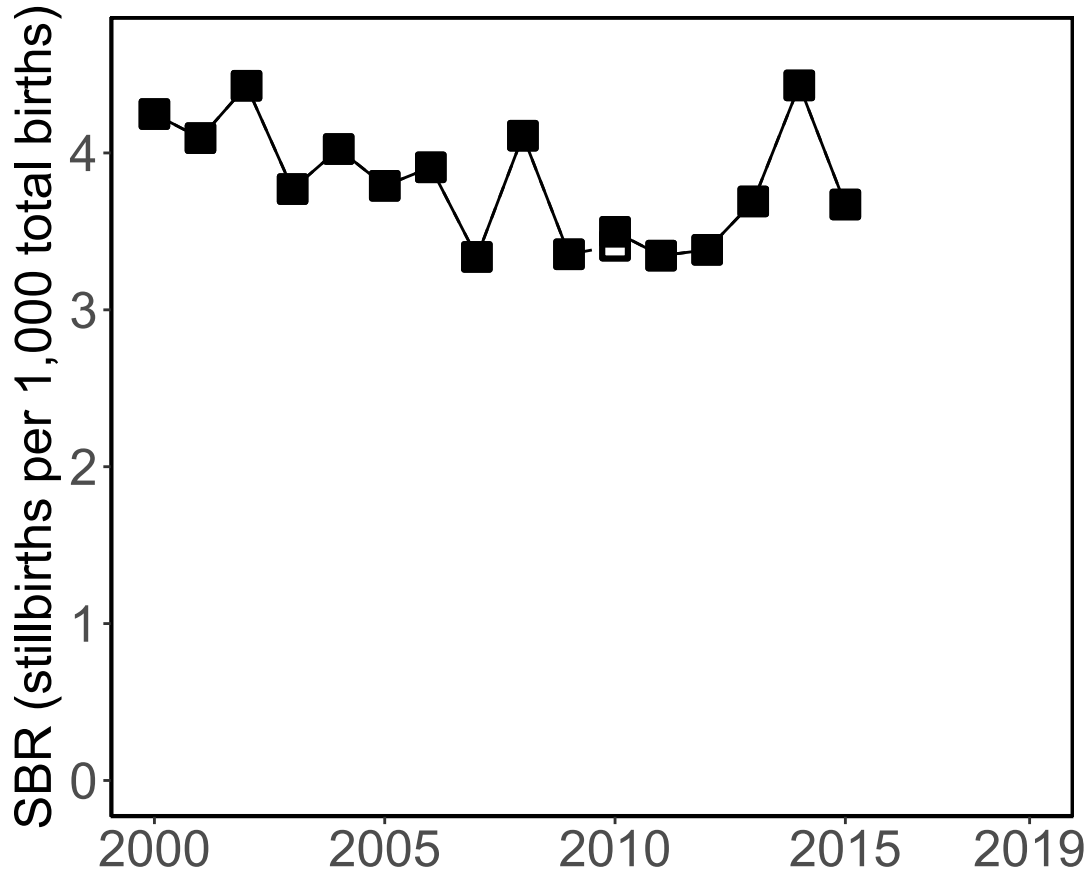

### '28+ Weeks of Gestation' Data (Incl. Adjusted Data)

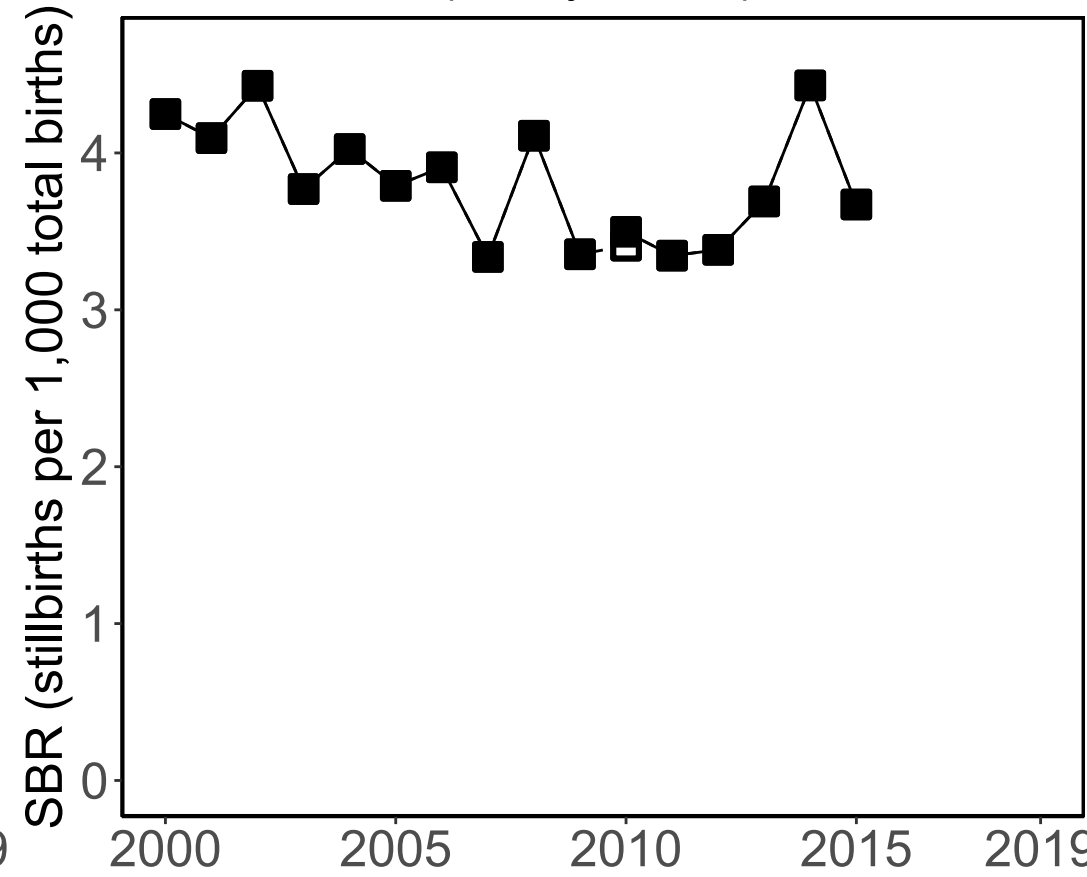

### Data Included in the Model

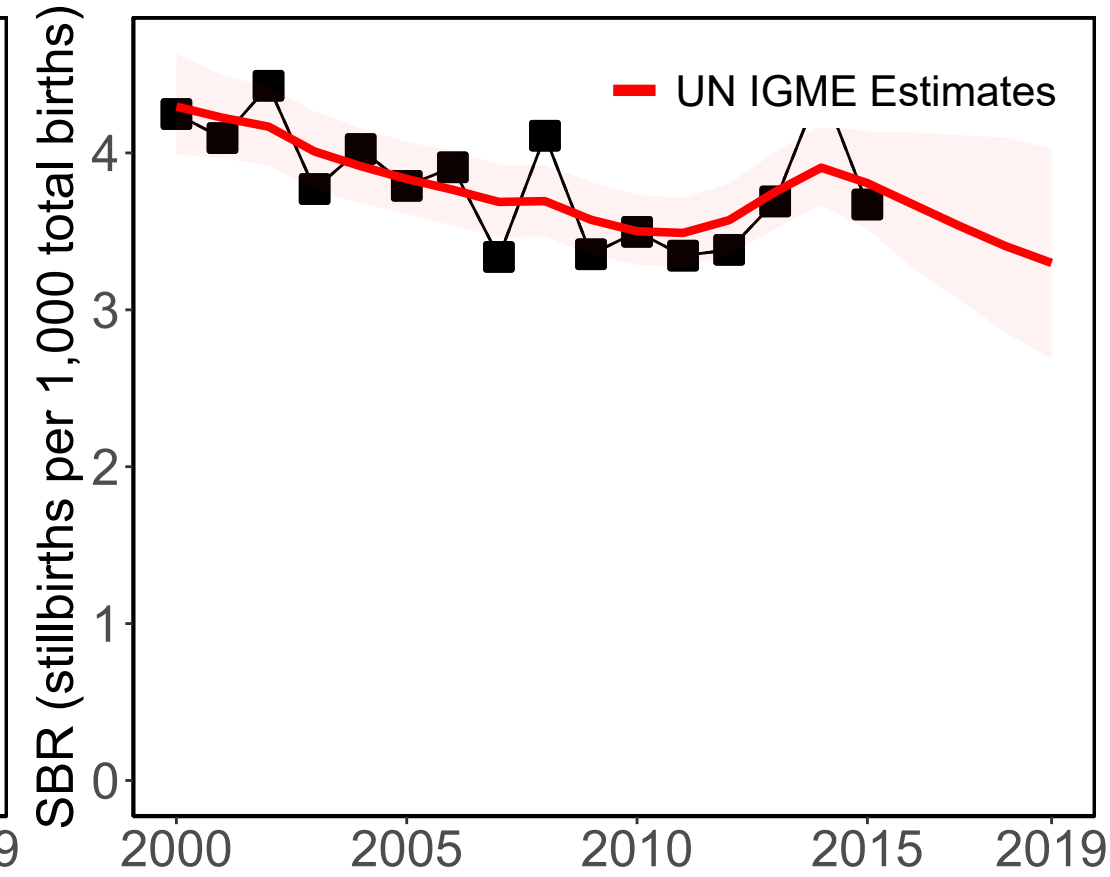

#### Source Types

□ Administrative

#### Data Sources

■ Vital Registration (28wks)



# Indonesia

Available Data

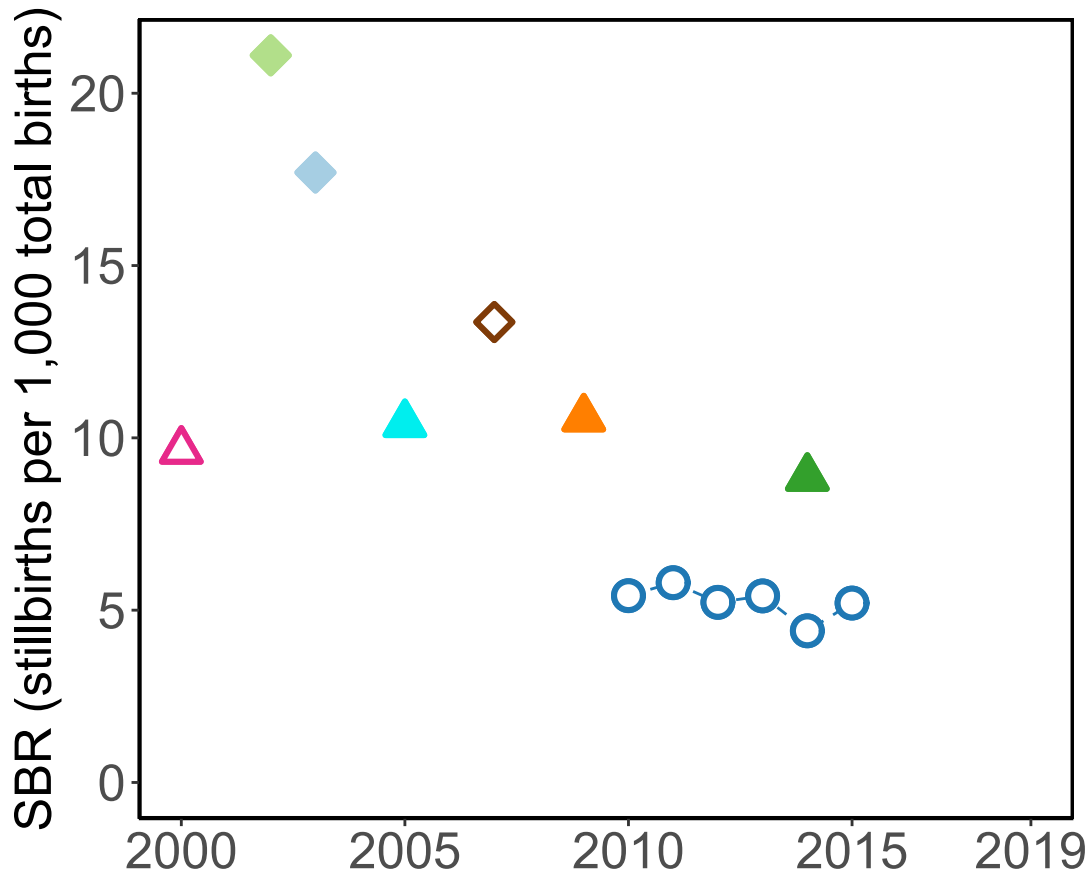

'28+ Weeks of Gestation' Data  
(Incl. Adjusted Data)

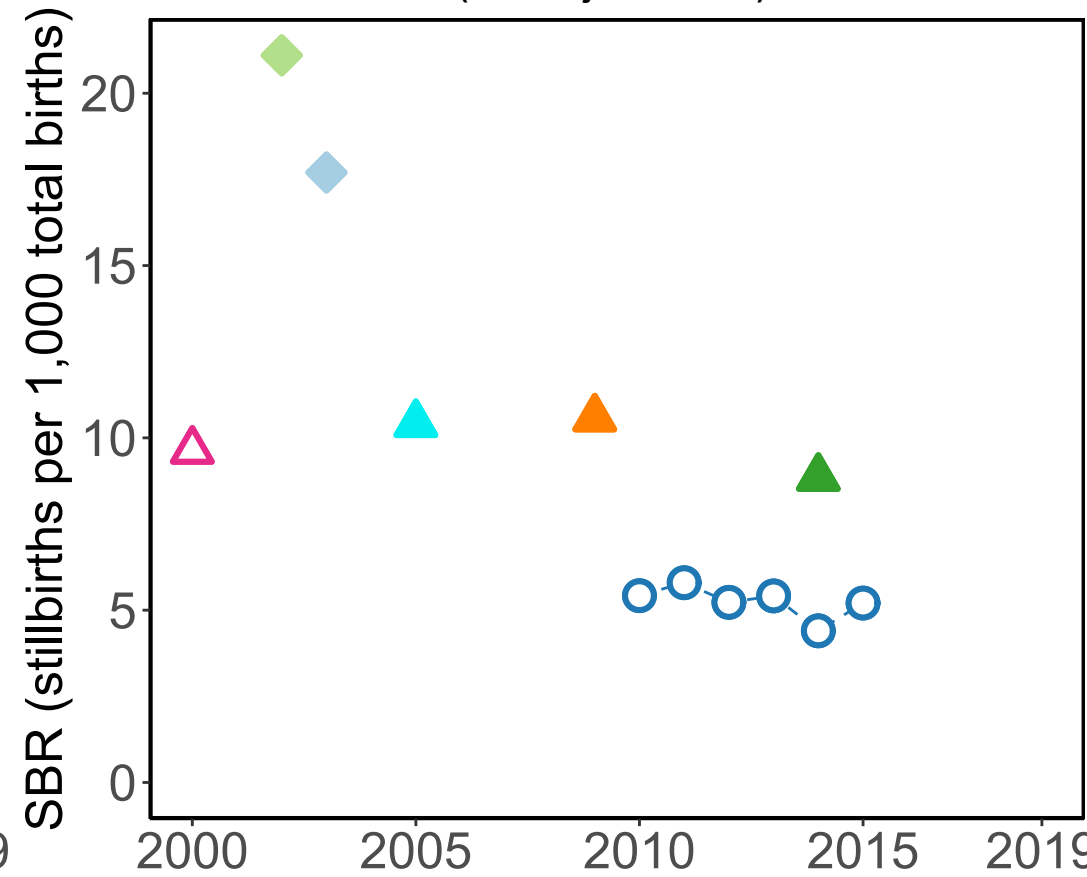

Data Included in the Model

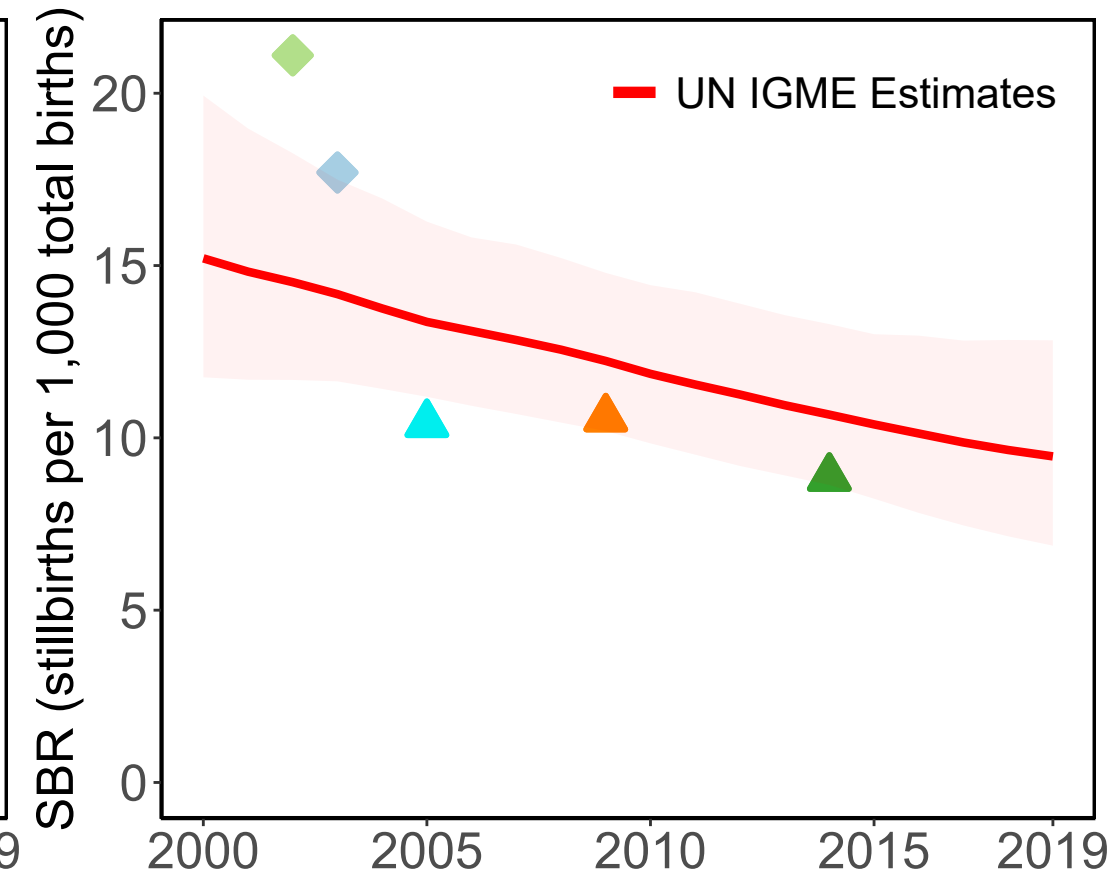

Source Types

- HMIS
- △ Survey
- ◇ Population study

Data Sources

- HMIS-DHIS2 (28wks)
- △ Demographic and Health Survey 2002-03 (DHS) (RC) (28wks)
- ◇ Shankar 2008 (28wks)
- △ Demographic and Health Survey 2017 (DHS) (RC) (28wks)
- △ Demographic and Health Survey 2007 (DHS) (RC) (28wks)
- ◇ Burke 2011 (1000g and 28wks)
- ◇ Sunawang 2009 (28wks)
- △ Demographic and Health Survey (Special) 2012 (DHS) (RC) (28wks)

# India

Available Data

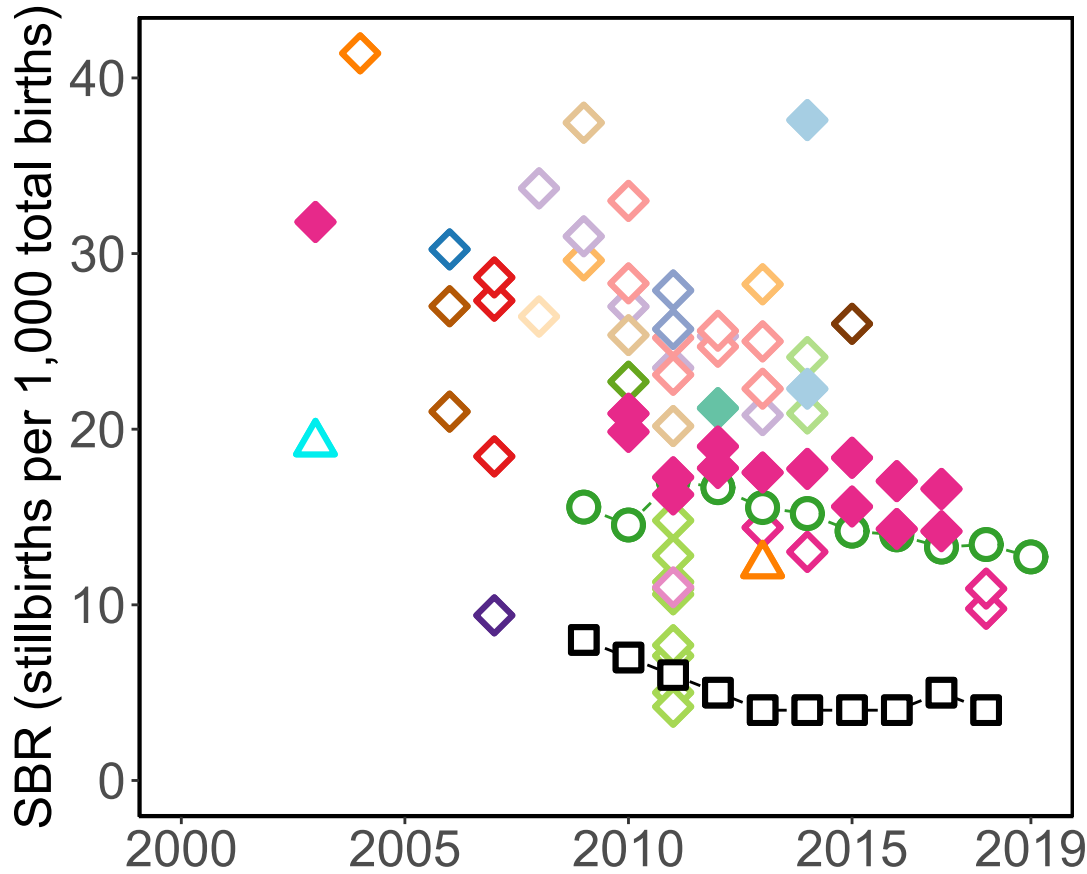

'28+ Weeks of Gestation' Data  
(Incl. Adjusted Data)

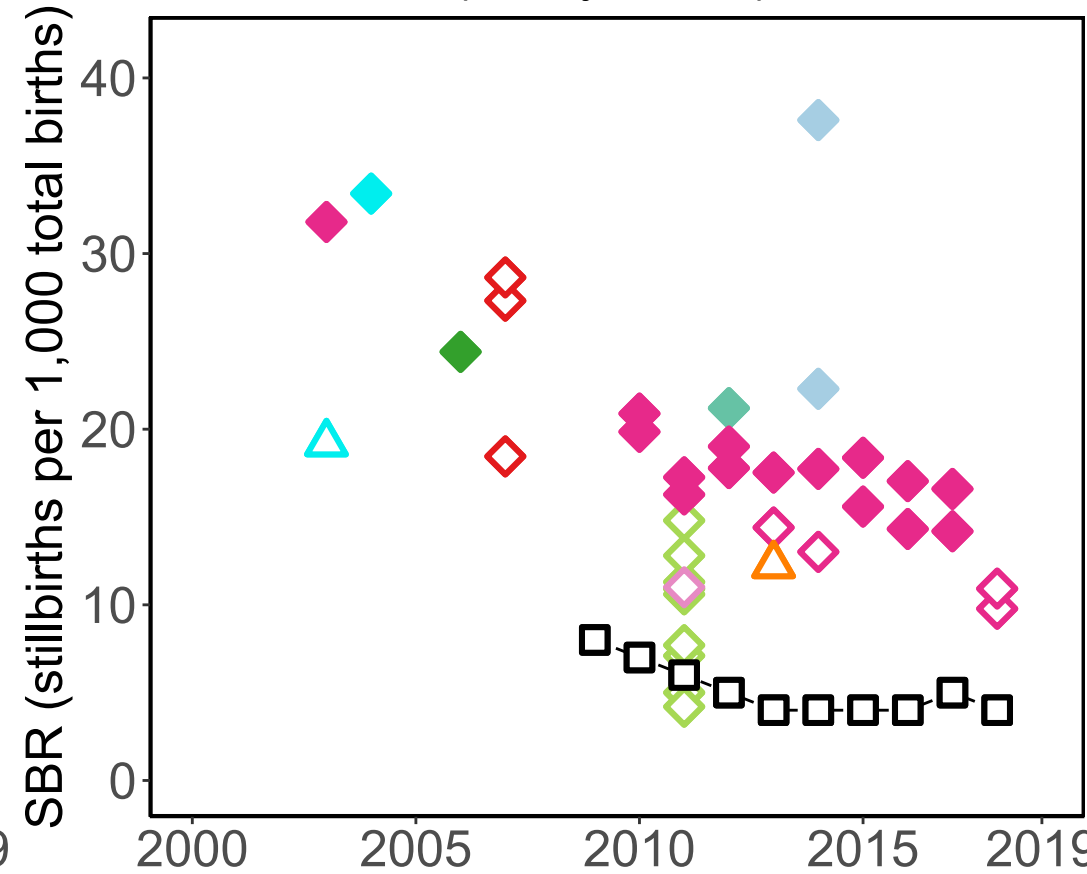

Data Included in the Model

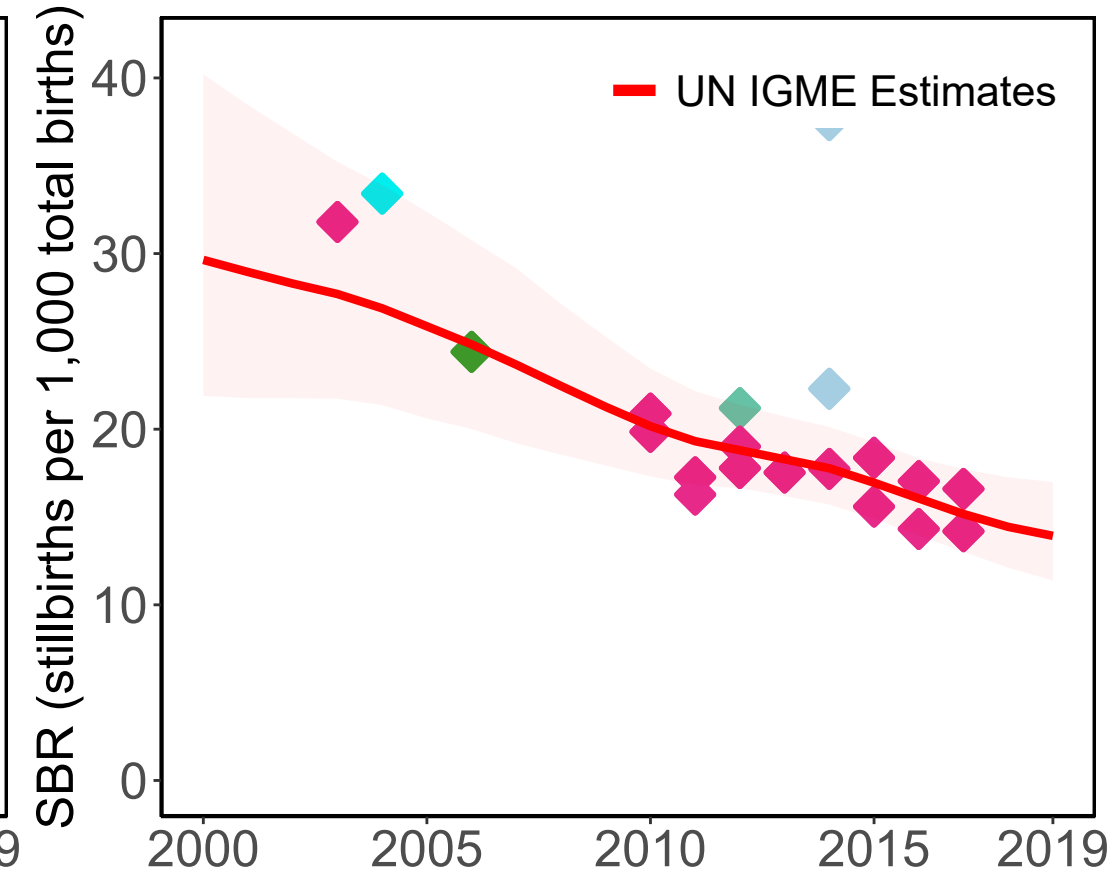

**Data Sources**

□ Sample Vital Registration (28wks)

○ HMIS-DHIS2 (20wks)

△ National Family Health Survey 2015-16 (DHS) (RC) (28wks)

△ National Family Health Survey 2005-06 (DHS) (RC) (28wks)

◇ Dhadad 2018 (500g or 20wks)

◇ AMANHI 2018 (28wks)

◇ McClure 2018 (500g or 20wks)

◇ Global Network Re-analysed (28wks)

◇ Reddy 2017 (not defined)

◇ Dandona 2017 (28wks)

◇ McClure 2015 (500g or 20wks)

◇ Altijani 2018 (28wks)

◇ Saleem 2014 (1000g and 28wks)

◇ Waiswa (28wks)

◇ Kodkany 2015 (not defined)

◇ Spector 2012 (not defined)

◇ Tripathy 2016 (not defined)

◇ Goudar 2013 (1000g and 28wks)

◇ Bhandari 2012 (not defined)

◇ McClure 2011 (28wks)

◇ More 2012 (any gestational age or birthweight)

◇ McClure 2007 (1000g)

◇ Prost 2013 (22wks)

◇ Prost 2013 (28wks adj from 22wks)

◇ Gupta 2006 (22wks)

◇ Gupta 2006 (28wks adj from 22wks)

◇ Baqui 2006 (28wks)

**Source Types**

□ Administrative ○ HMIS △ Survey ◇ Population study

# Ireland

### Available Data

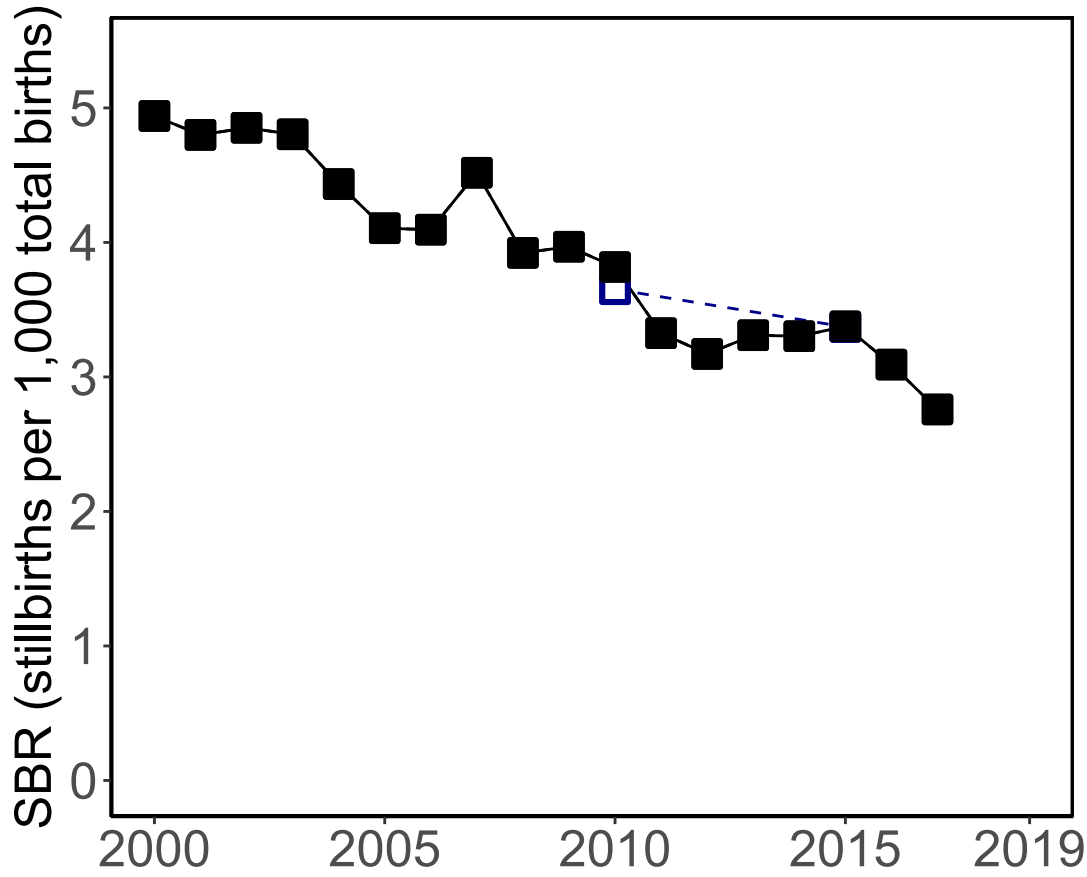

### '28+ Weeks of Gestation' Data (Incl. Adjusted Data)

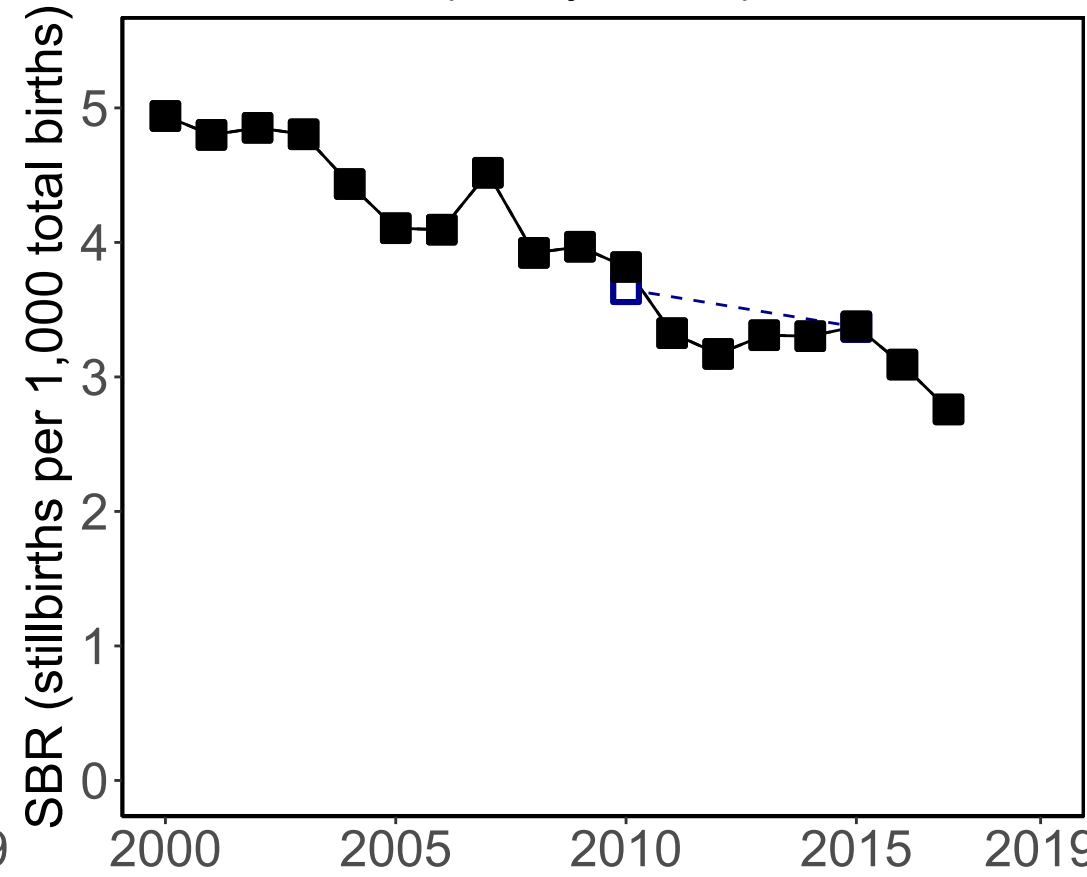

### Data Included in the Model

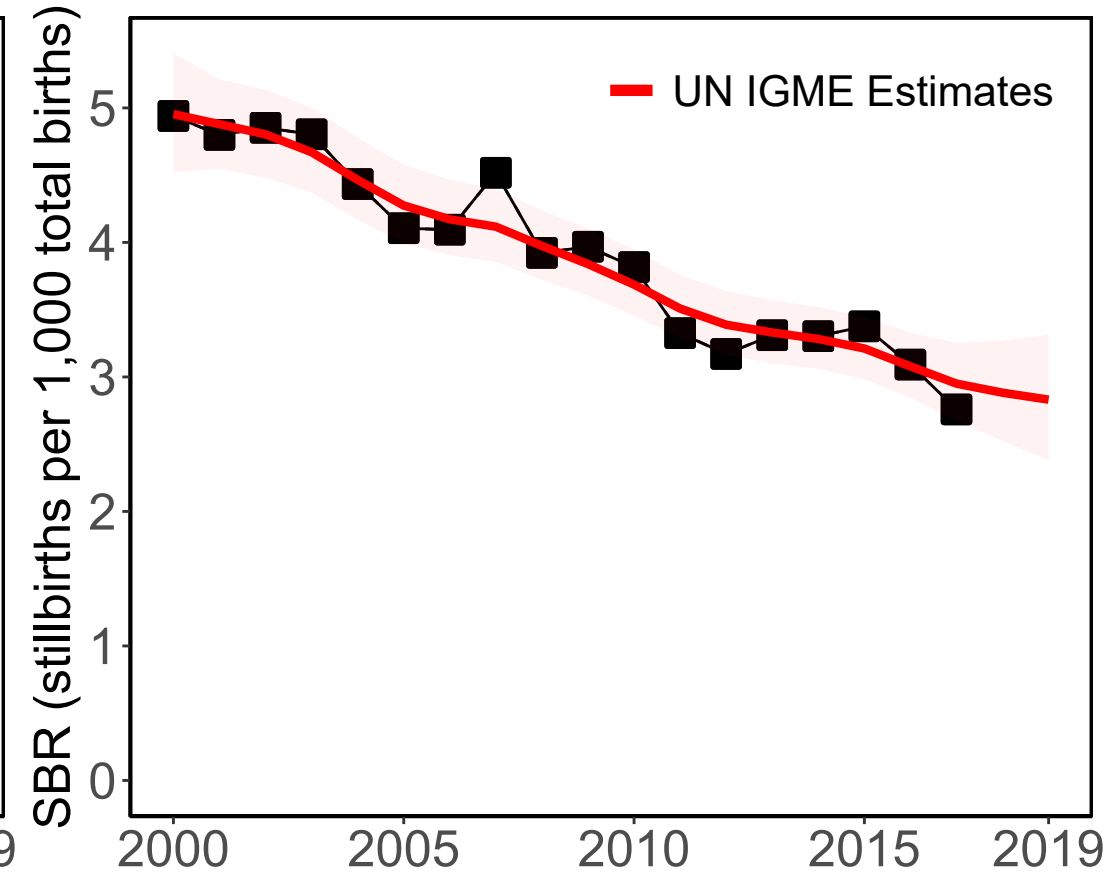

#### Source Types

Administrative

#### Data Sources

Vital Registration (28wks)

Birth or Death Registry (28wks)

# Iran (Islamic Republic of)

## Available Data

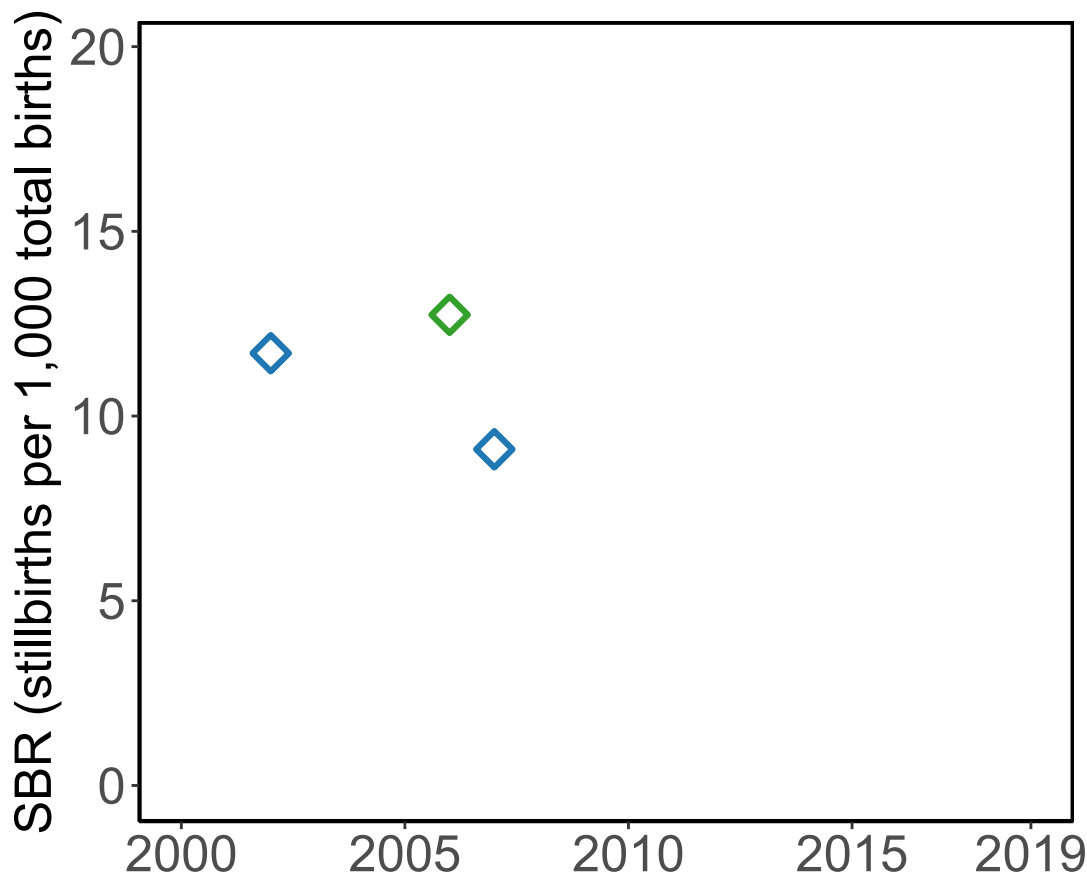

## '28+ Weeks of Gestation' Data (Incl. Adjusted Data)

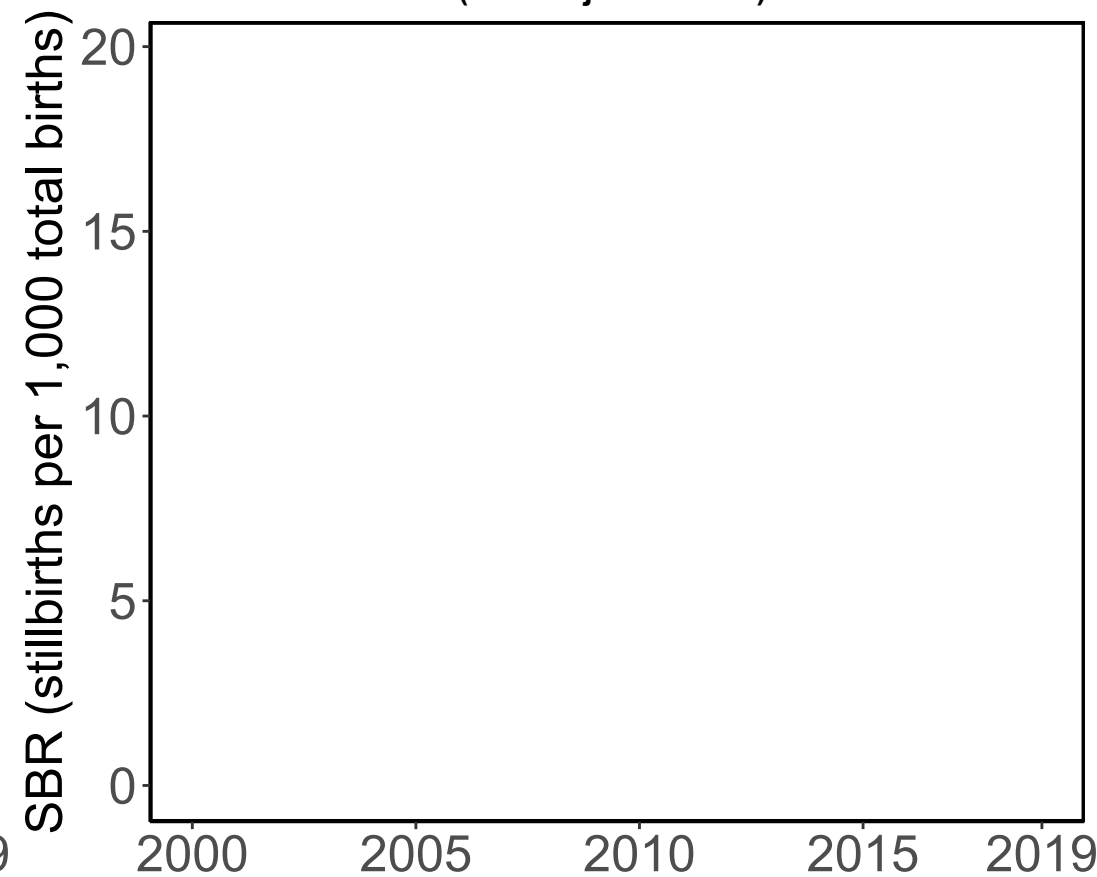

## Data Included in the Model

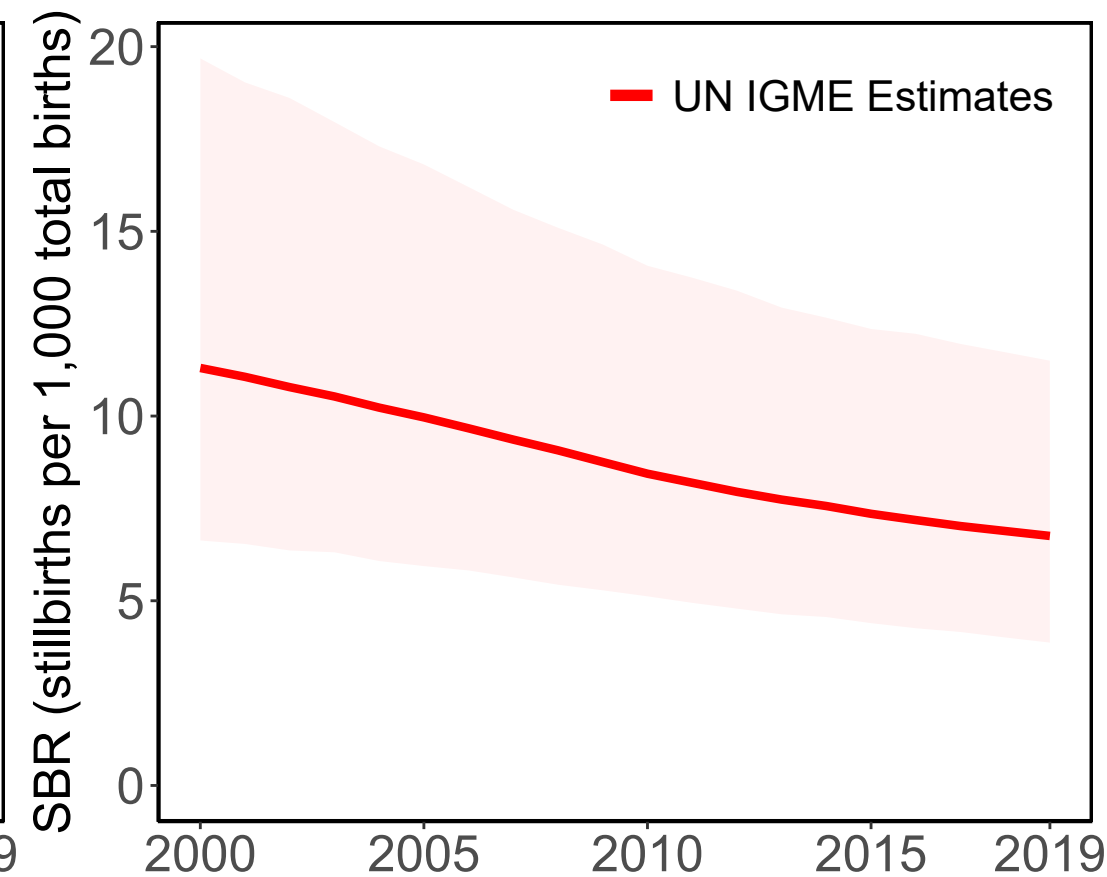

### Source Types

◇ Population study

### Data Sources

◇ Hadavi 2011 (20wks)

◇ Alizadeh 2015 (not defined)

# Iraq

### Available Data

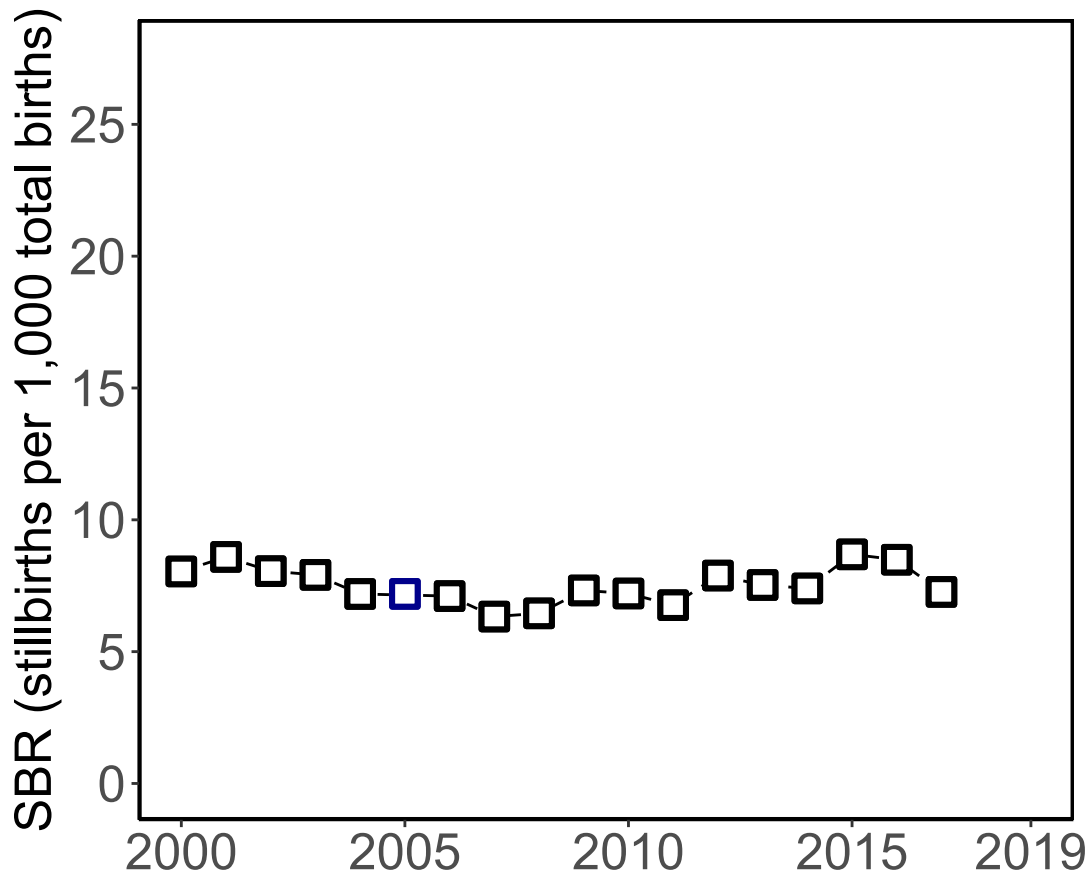

### '28+ Weeks of Gestation' Data (Incl. Adjusted Data)

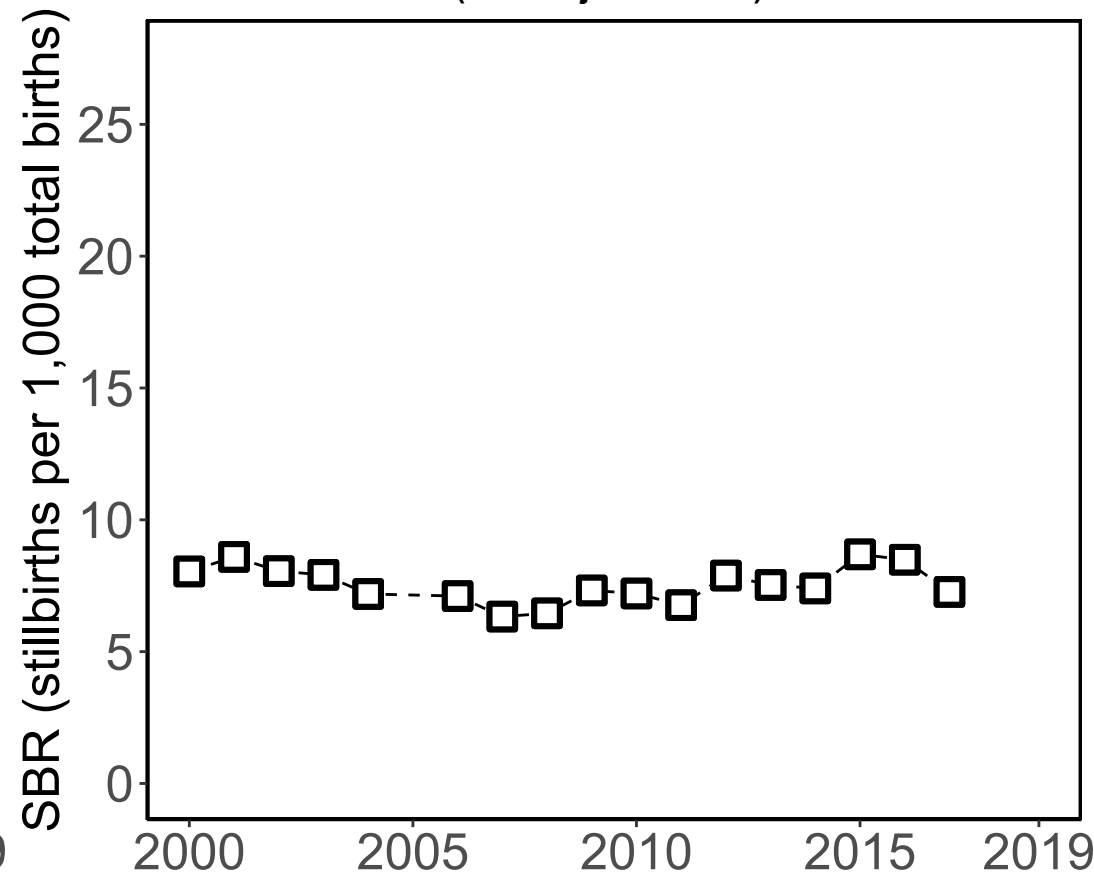

### Data Included in the Model

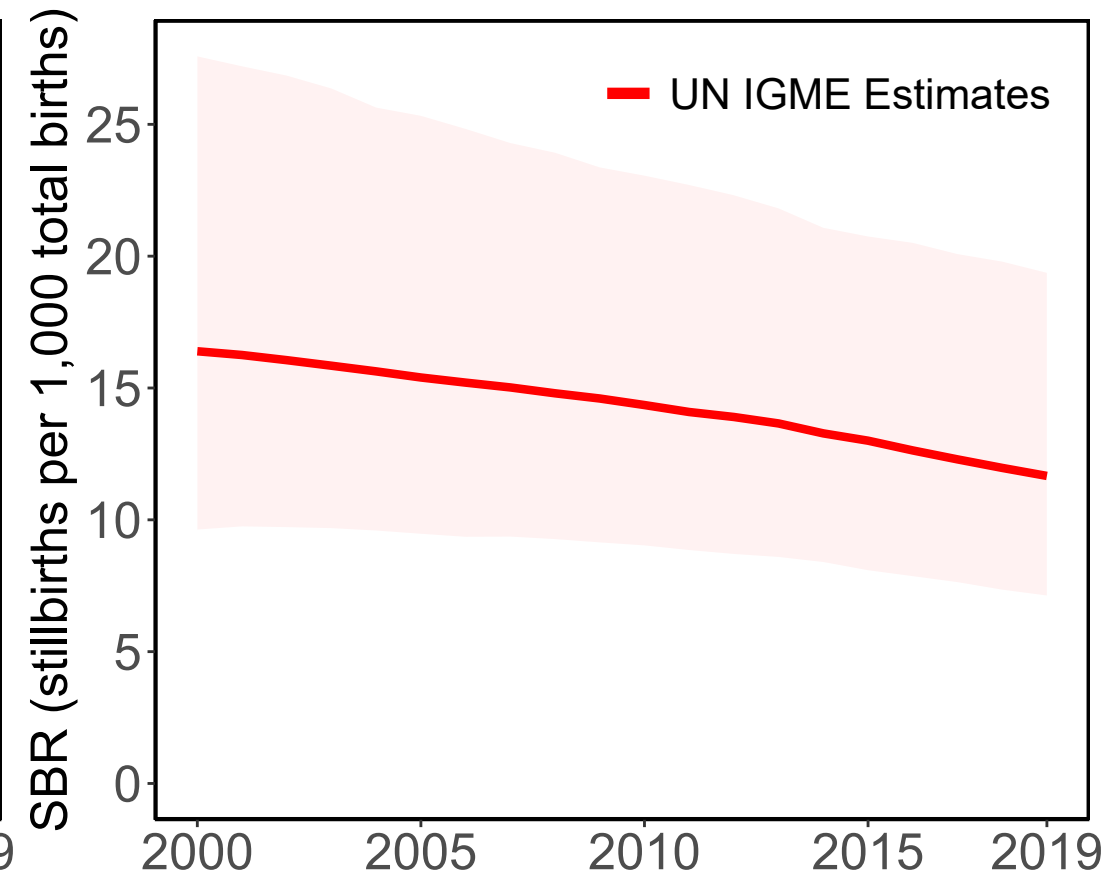

#### Source Types

□ Administrative

#### Data Sources

□ Vital Registration (28wks)

□ Vital Registration (not defined)

# Iceland

### Available Data

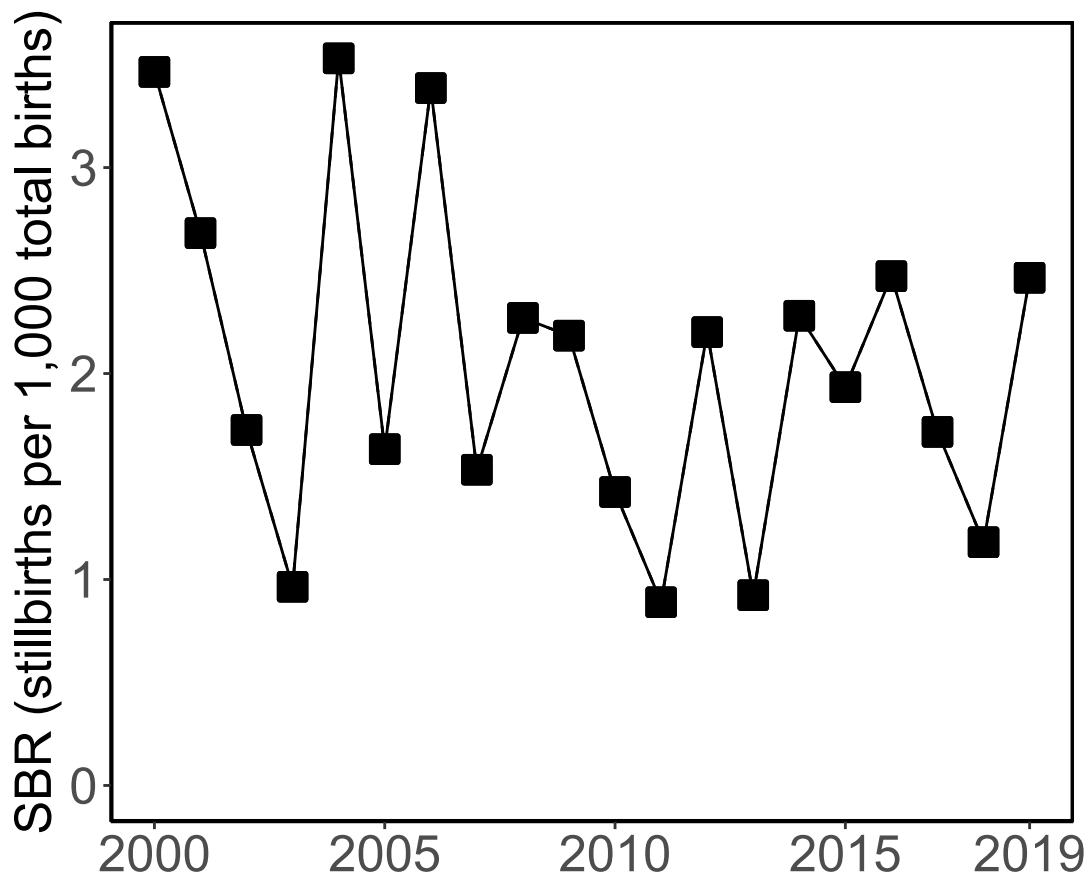

### '28+ Weeks of Gestation' Data (Incl. Adjusted Data)

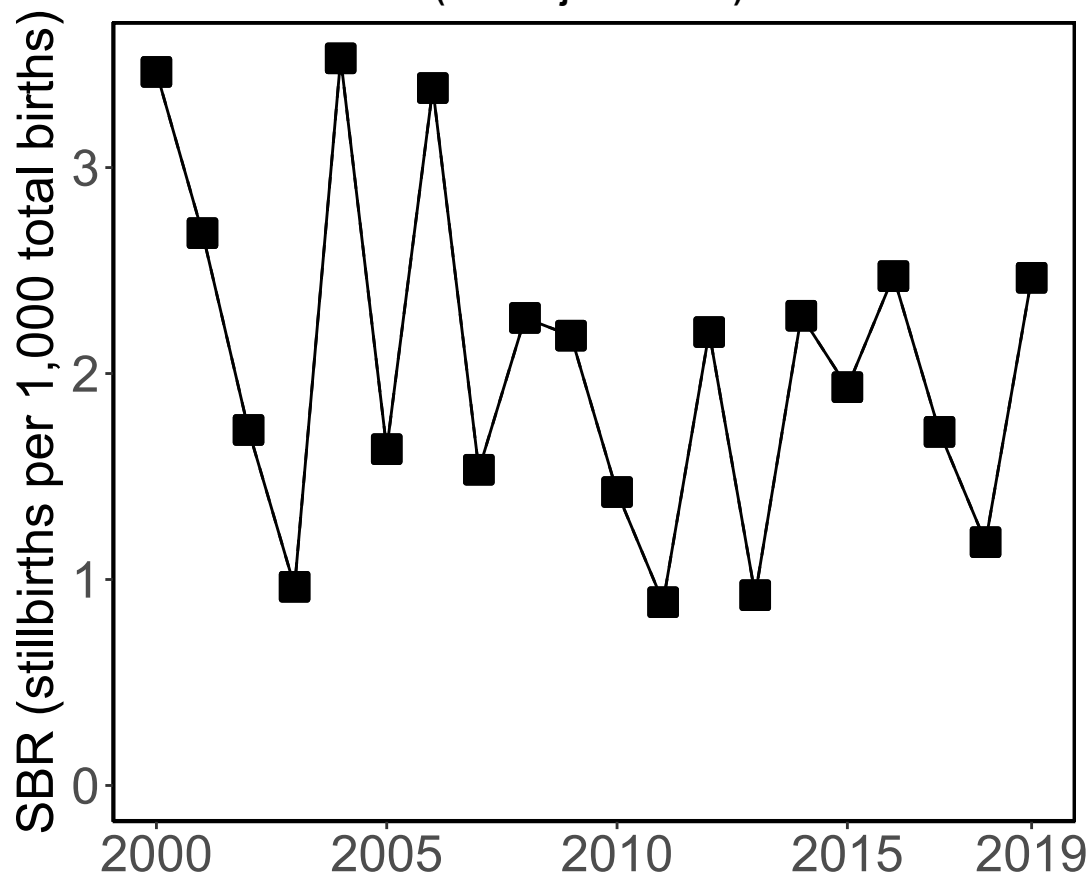

### Data Included in the Model

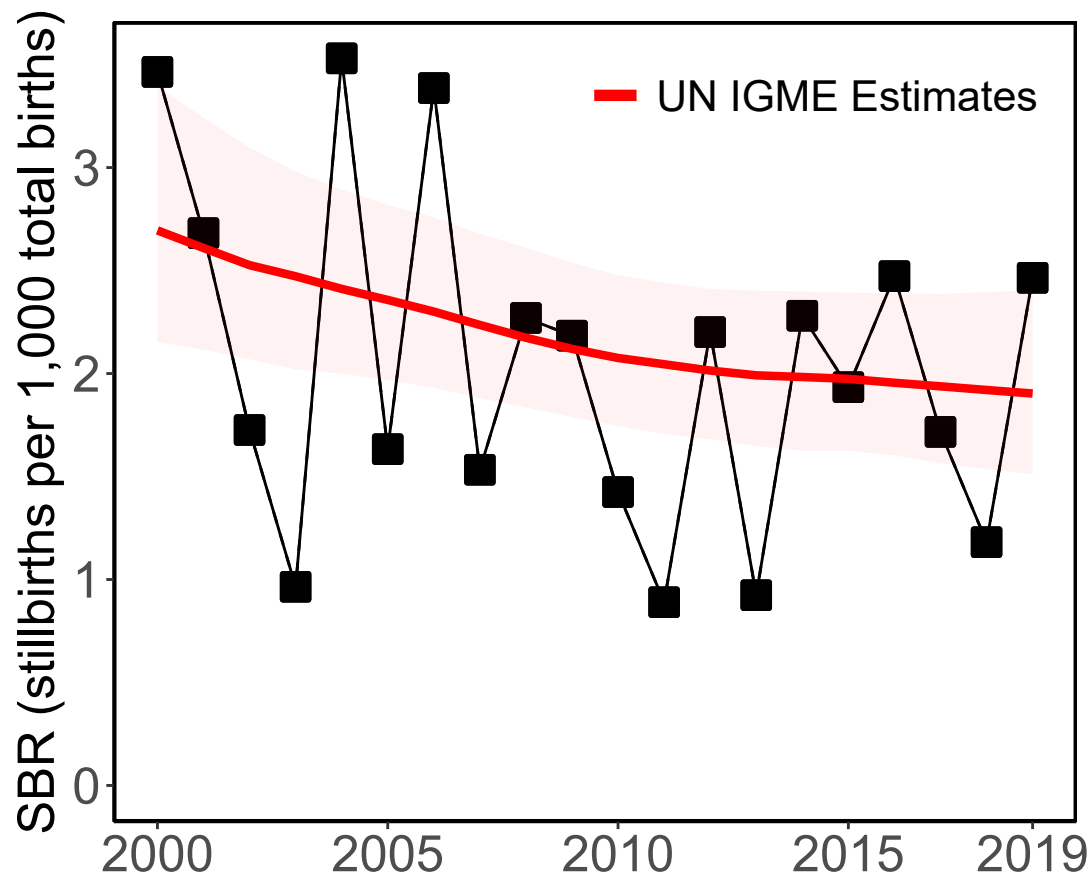

#### Source Types

□ Administrative

#### Data Sources

■ Birth or Death Registry (28wks)

# Israel

### Available Data

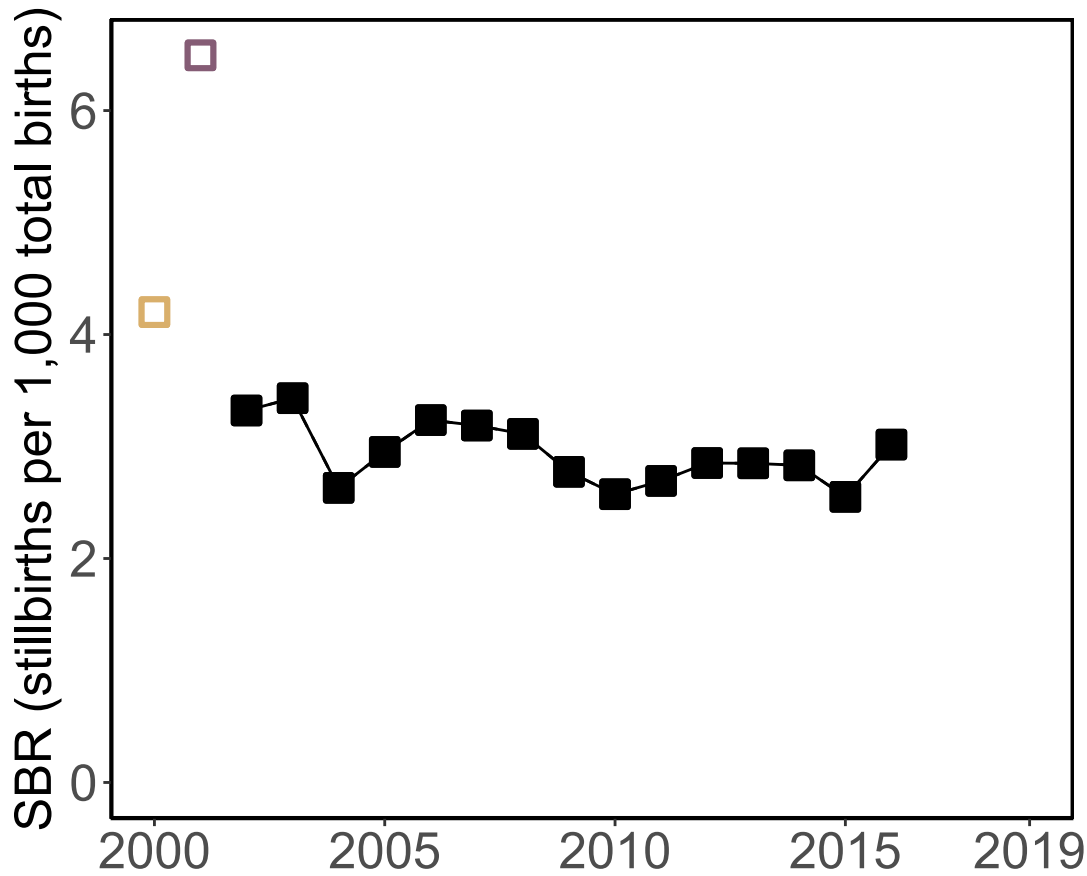

### '28+ Weeks of Gestation' Data (Incl. Adjusted Data)

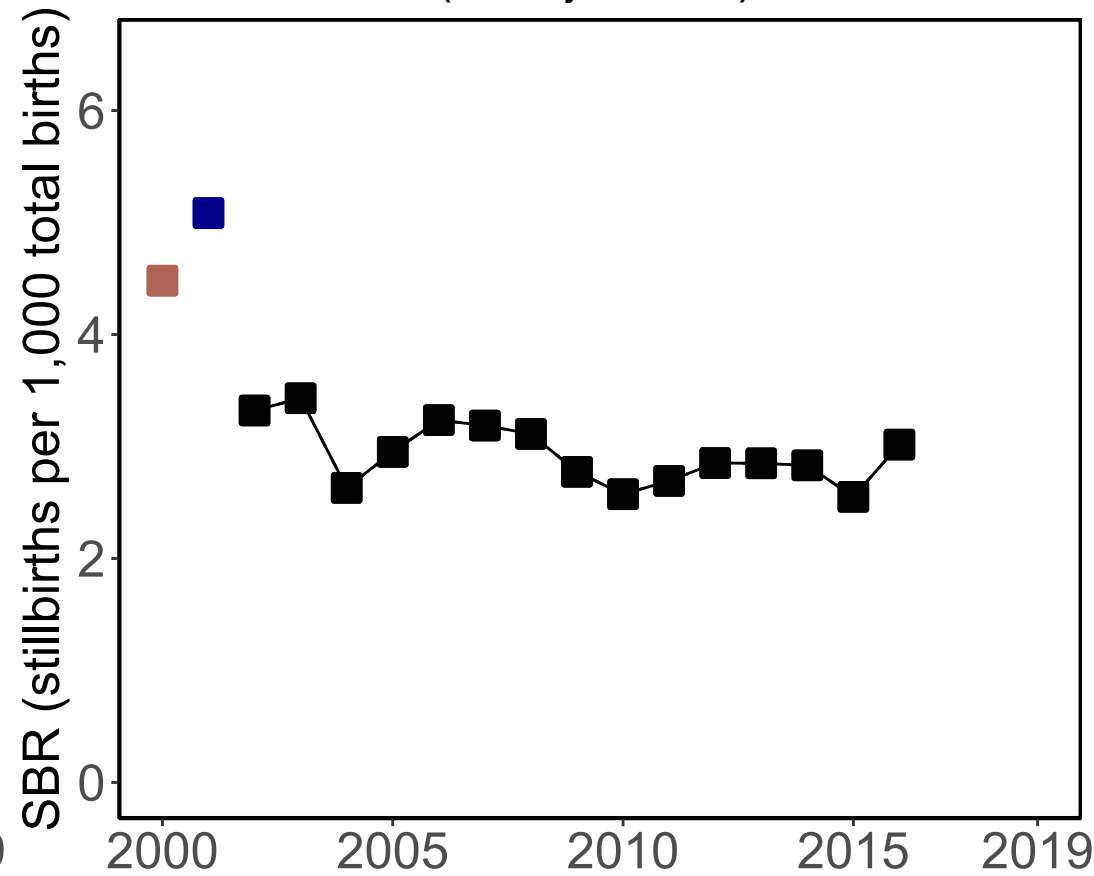

### Data Included in the Model

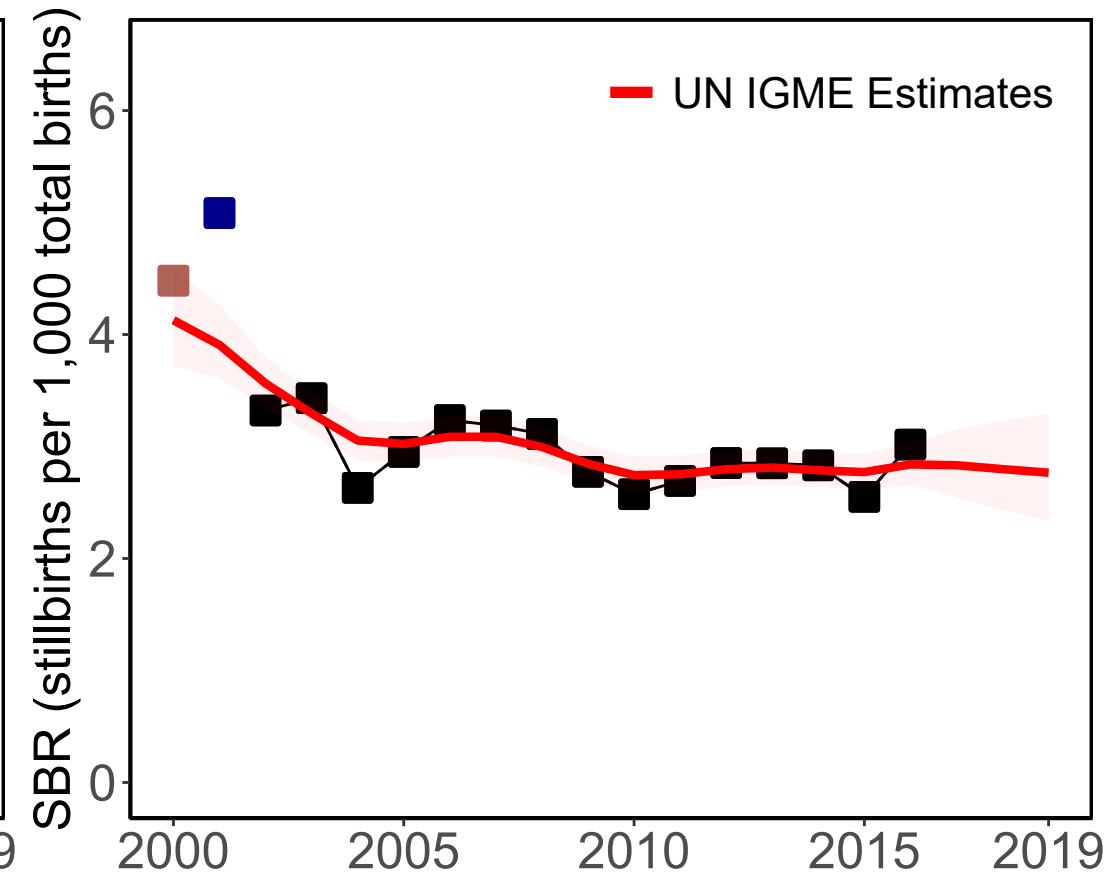

#### Source Types

Administrative

#### Data Sources

Vital Registration (28wks)

Vital Registration (28wks adj from 500g)

Vital Registration (500g)

Vital Registration (1000g)

Vital Registration (28wks adj from 1000g)

# Italy

### Available Data

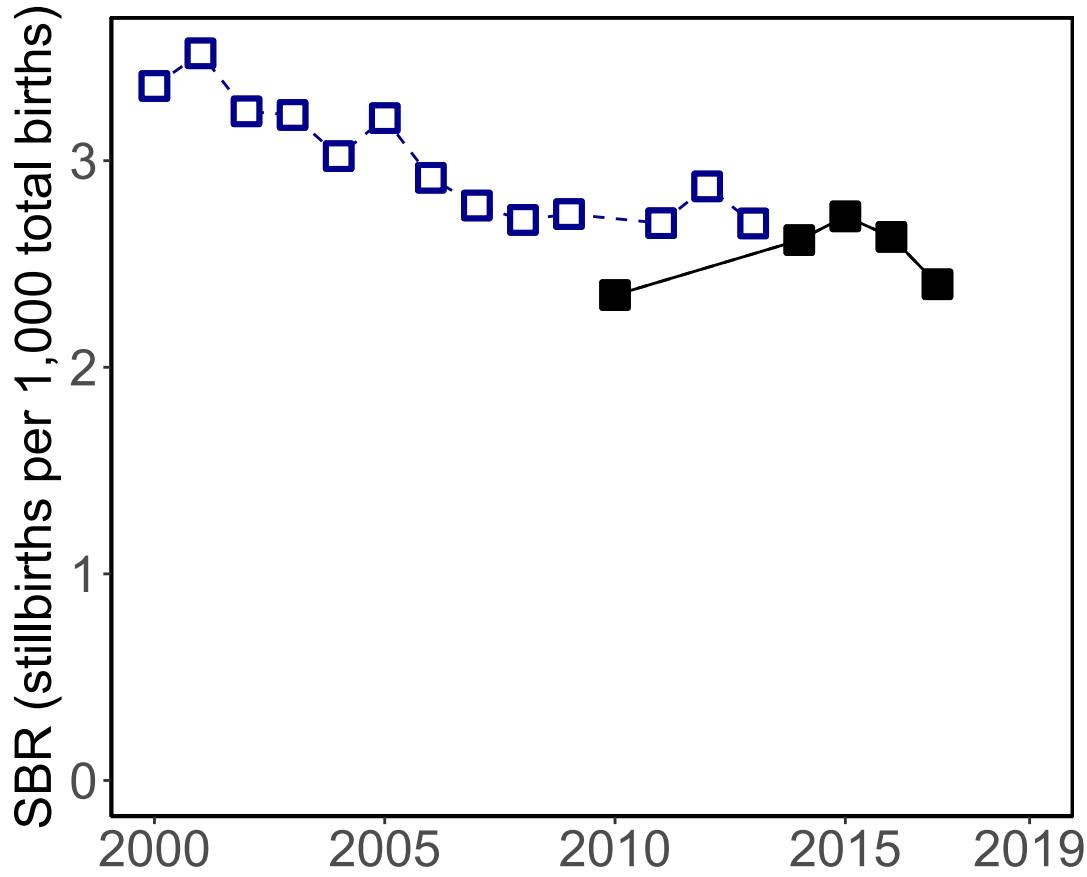

### '28+ Weeks of Gestation' Data (Incl. Adjusted Data)

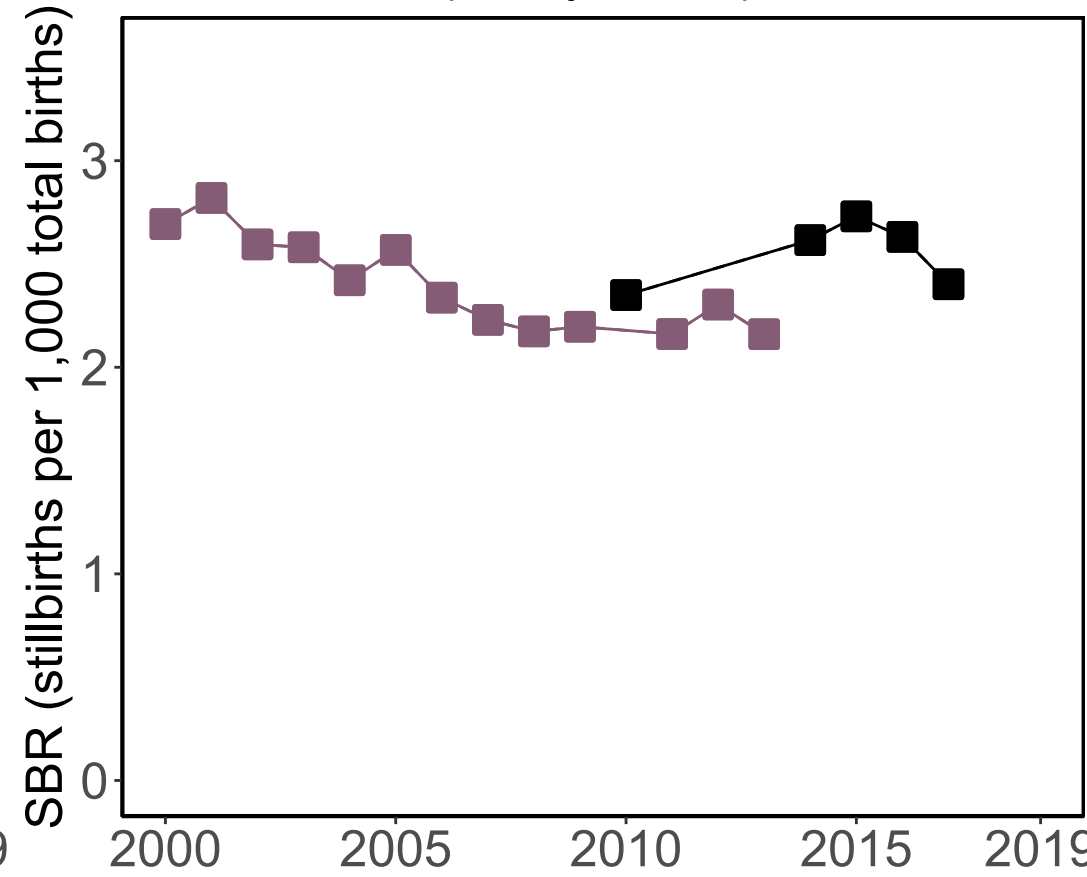

### Data Included in the Model

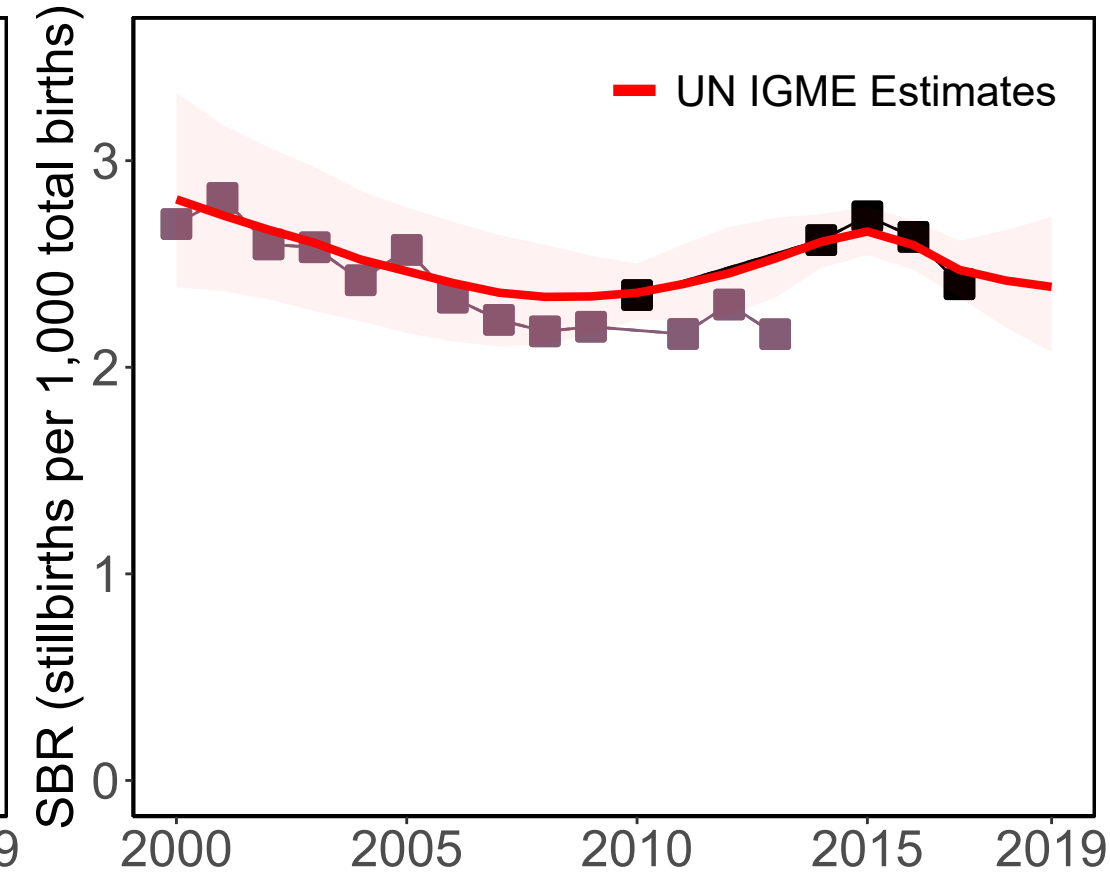

#### Source Types

□ Administrative

#### Data Sources

■ Vital Registration (28wks)

□ Vital Registration (24wks)

■ Vital Registration (28wks adj from 24wks)

— UN IGME Estimates



# Jamaica

Available Data

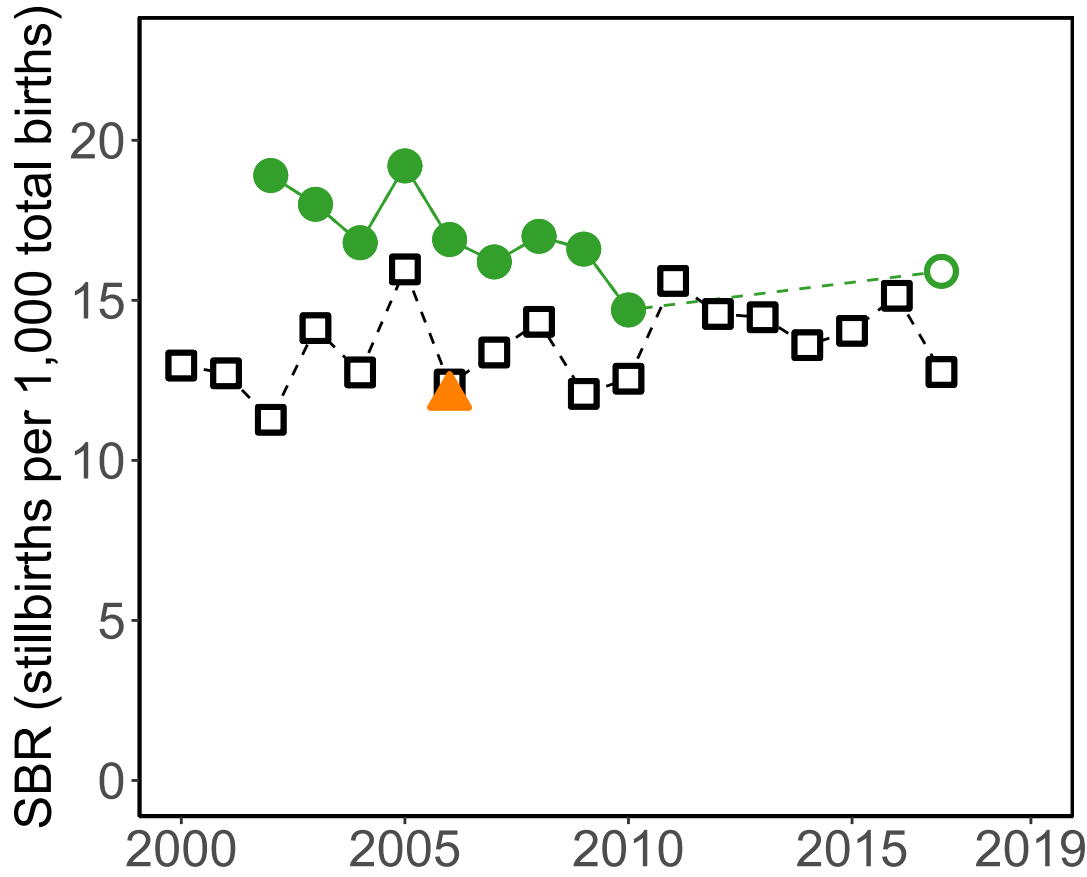

'28+ Weeks of Gestation' Data  
(Incl. Adjusted Data)

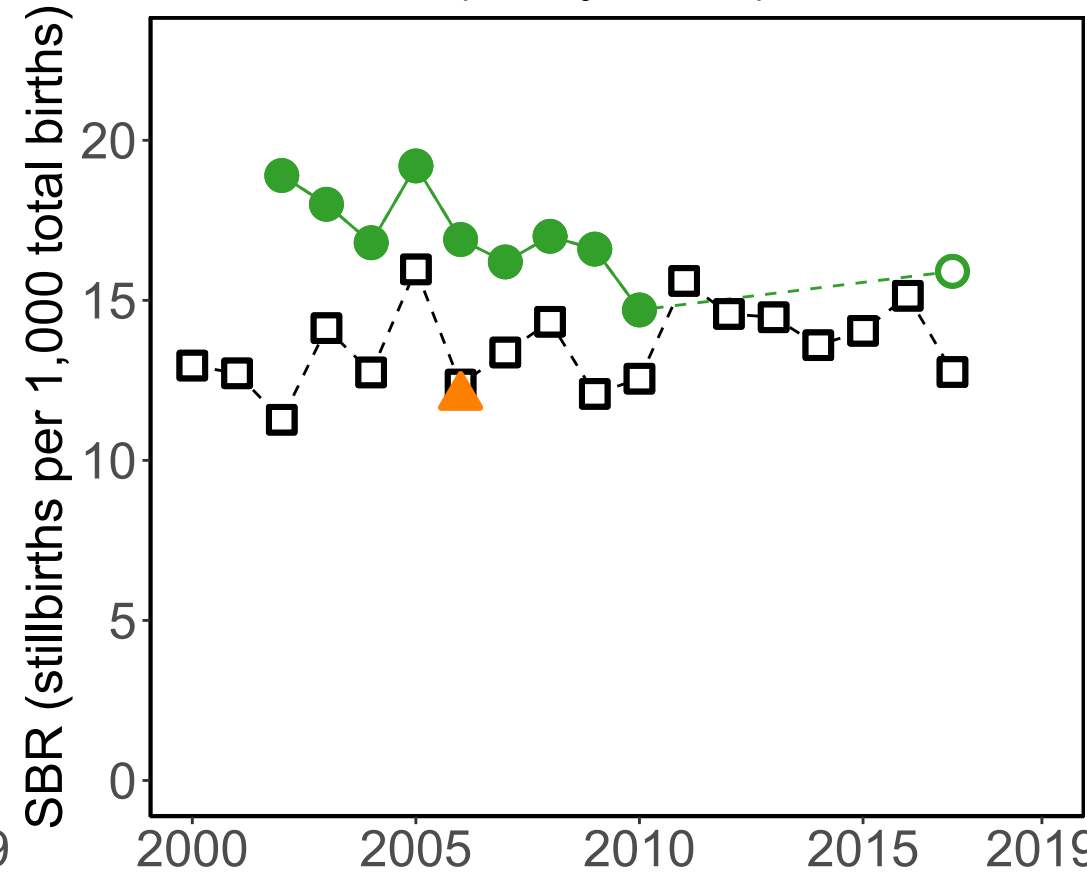

Data Included in the Model

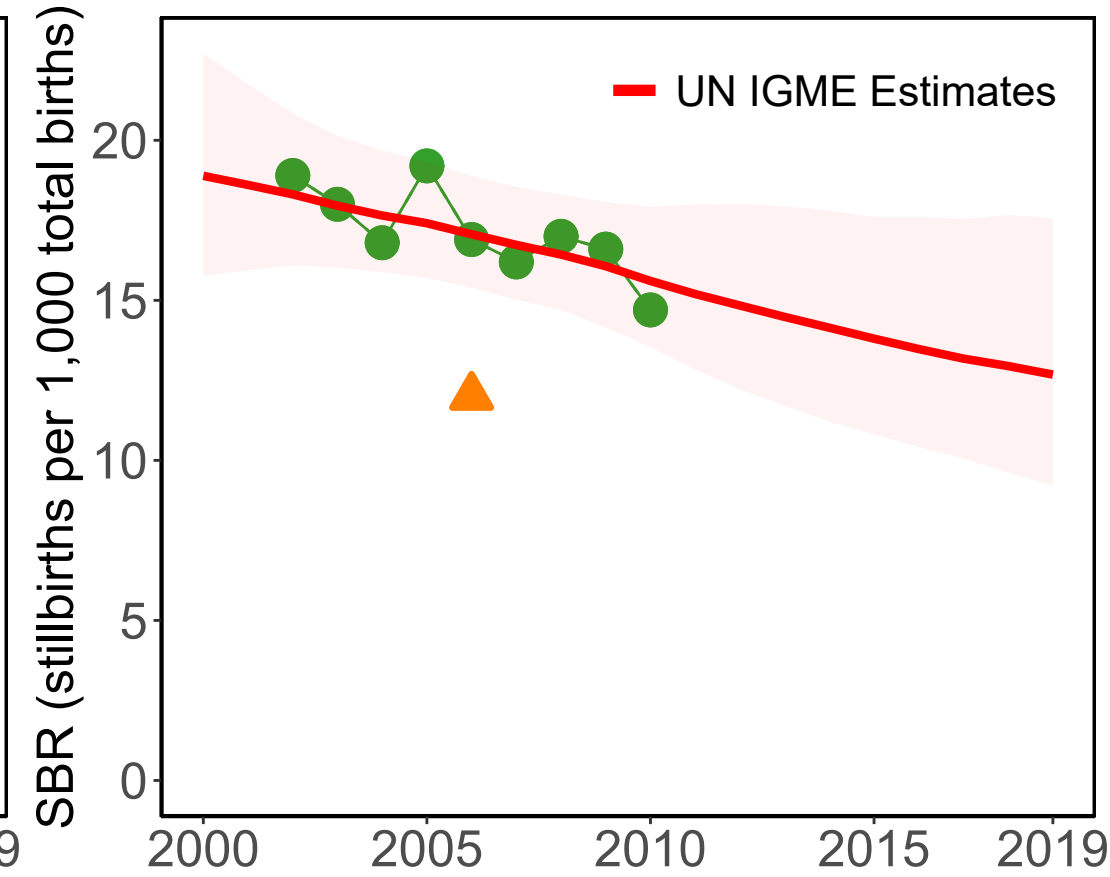

Source Types

- Administrative
- HMIS
- Survey

Data Sources

- Vital Registration (28wks)
- HMIS-DHIS2 (28wks)
- Reproductive and Health Survey 2008-09 (RHS) (PH) (28wks)

# Jordan

### Available Data

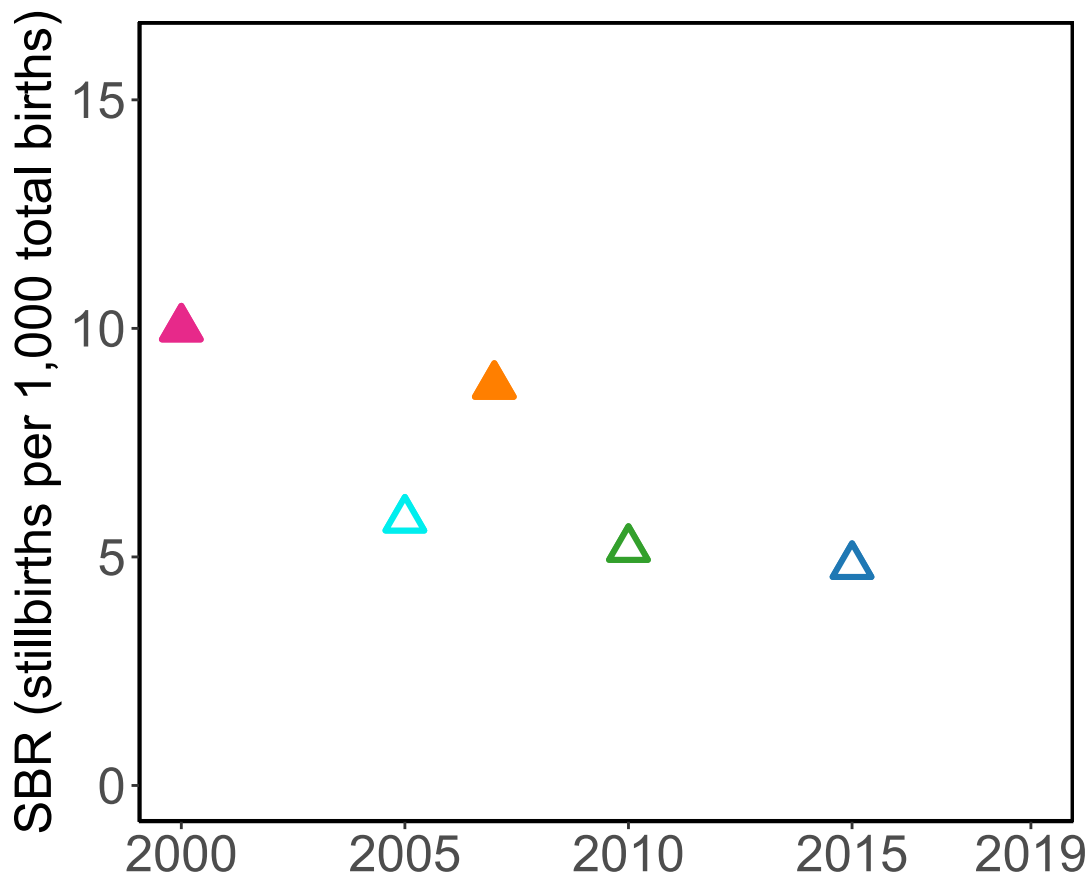

### '28+ Weeks of Gestation' Data (Incl. Adjusted Data)

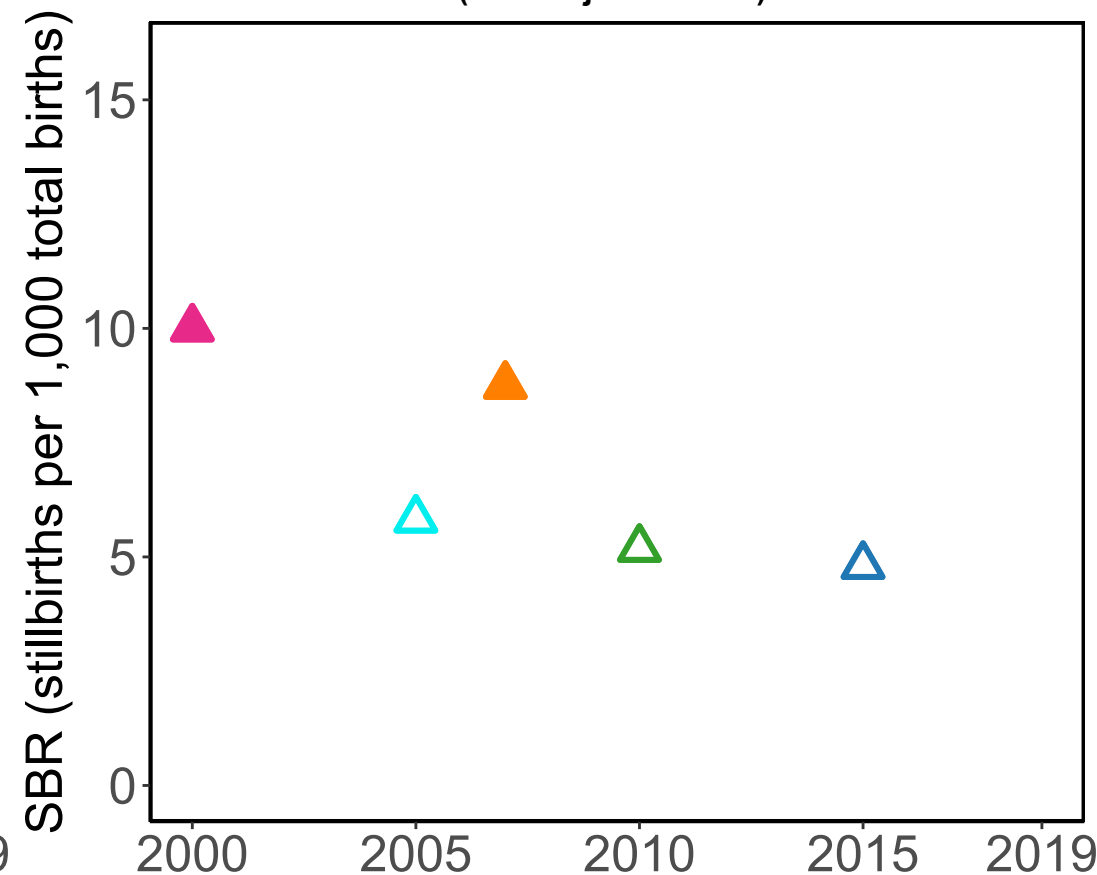

### Data Included in the Model

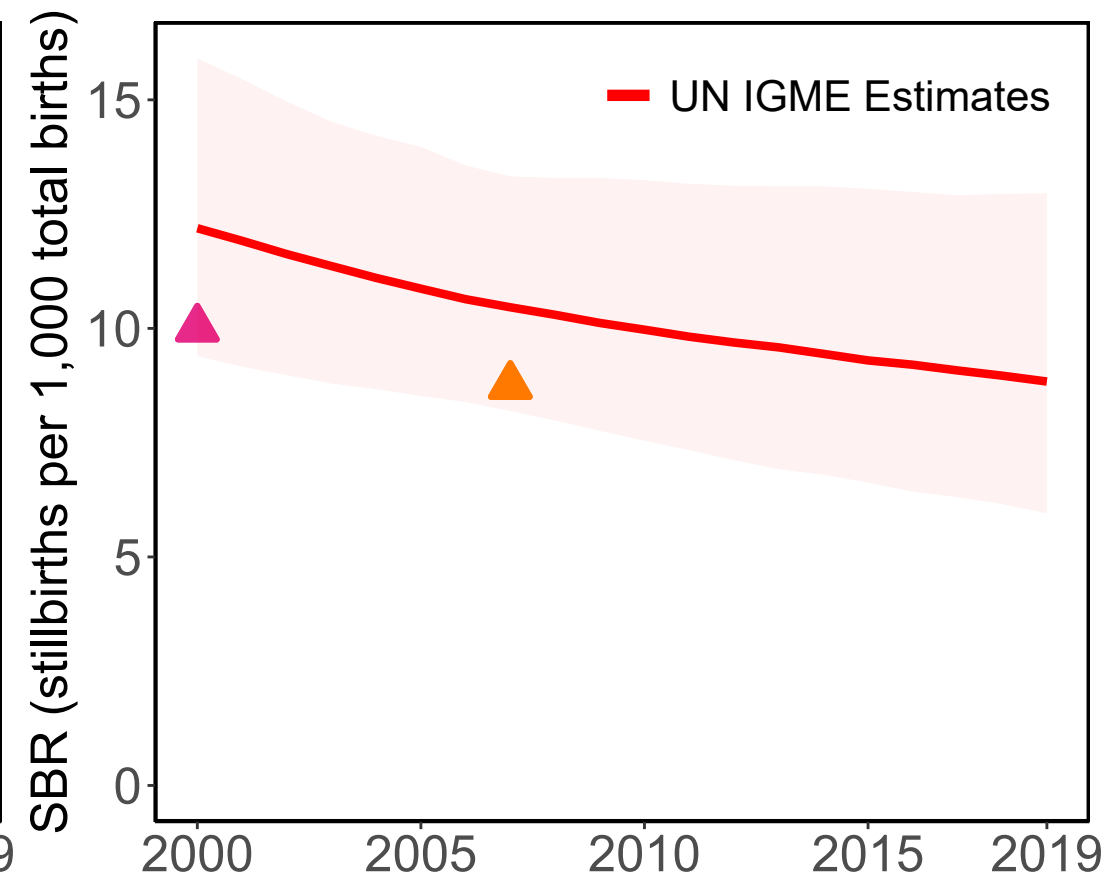

#### Source Types

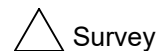

#### Data Sources

Population and Family Health Survey 2017-18 (DHS) (RC) (28wks)

Population and Family Health Survey 2009 (DHS) (RC) (28wks)

Population and Family Health Survey 2002 (DHS) (RC) (28wks)

Population and Family Health Survey 2012 (DHS) (RC) (28wks)

Population and Family Health Survey 2007 (DHS) (RC) (28wks)

# Japan

### Available Data

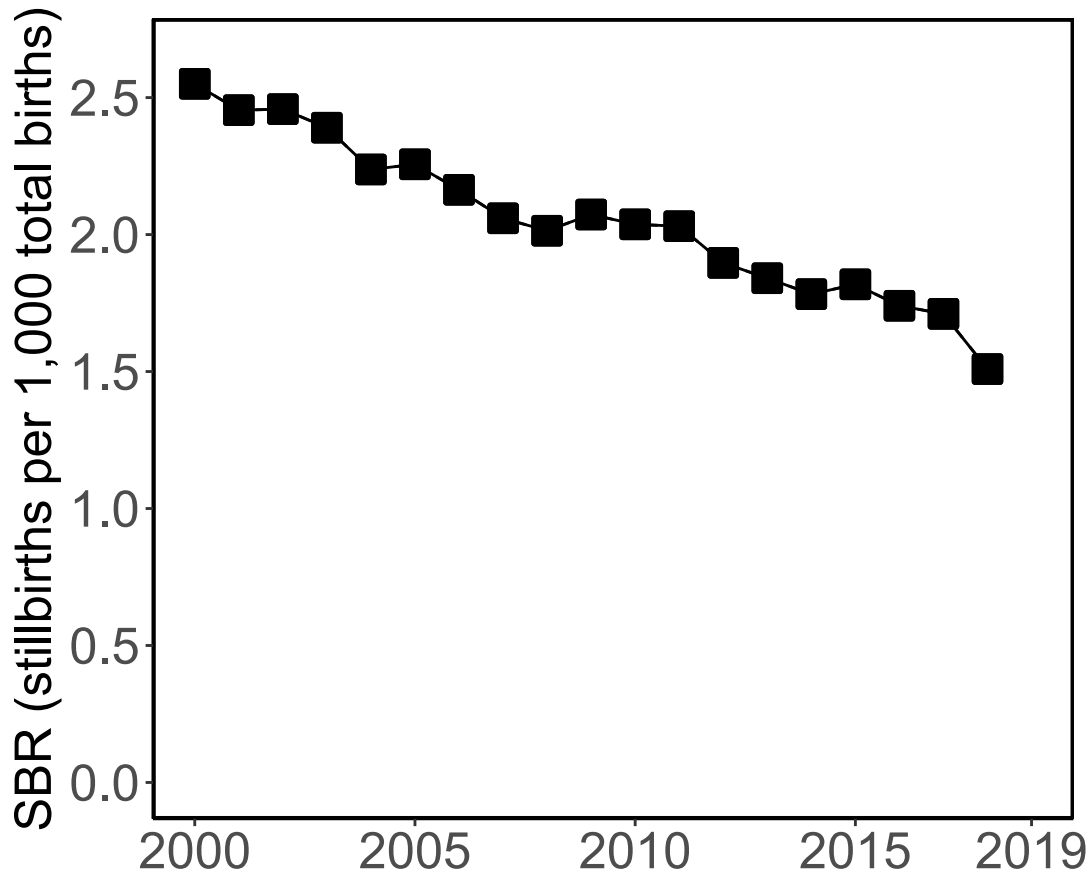

### '28+ Weeks of Gestation' Data (Incl. Adjusted Data)

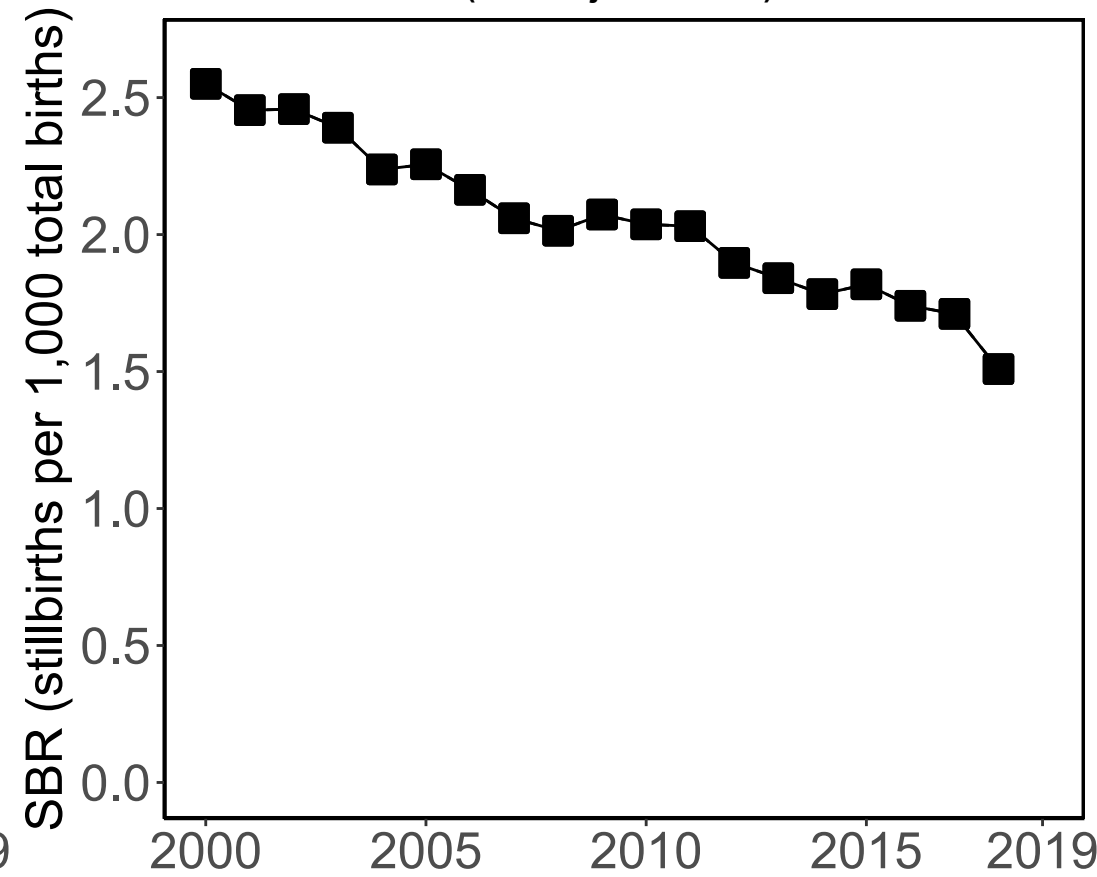

### Data Included in the Model

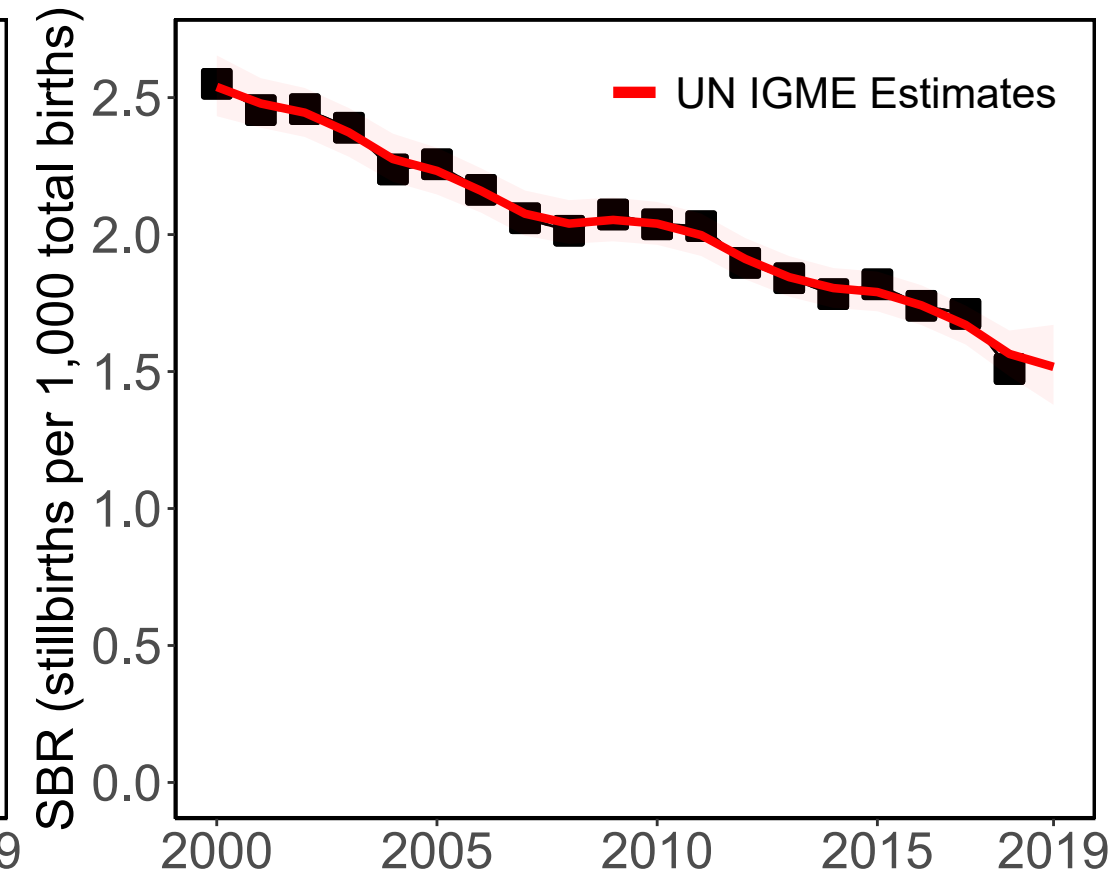

#### Source Types

□ Administrative

#### Data Sources

■ Vital Registration (28wks)

# Kazakhstan

### Available Data

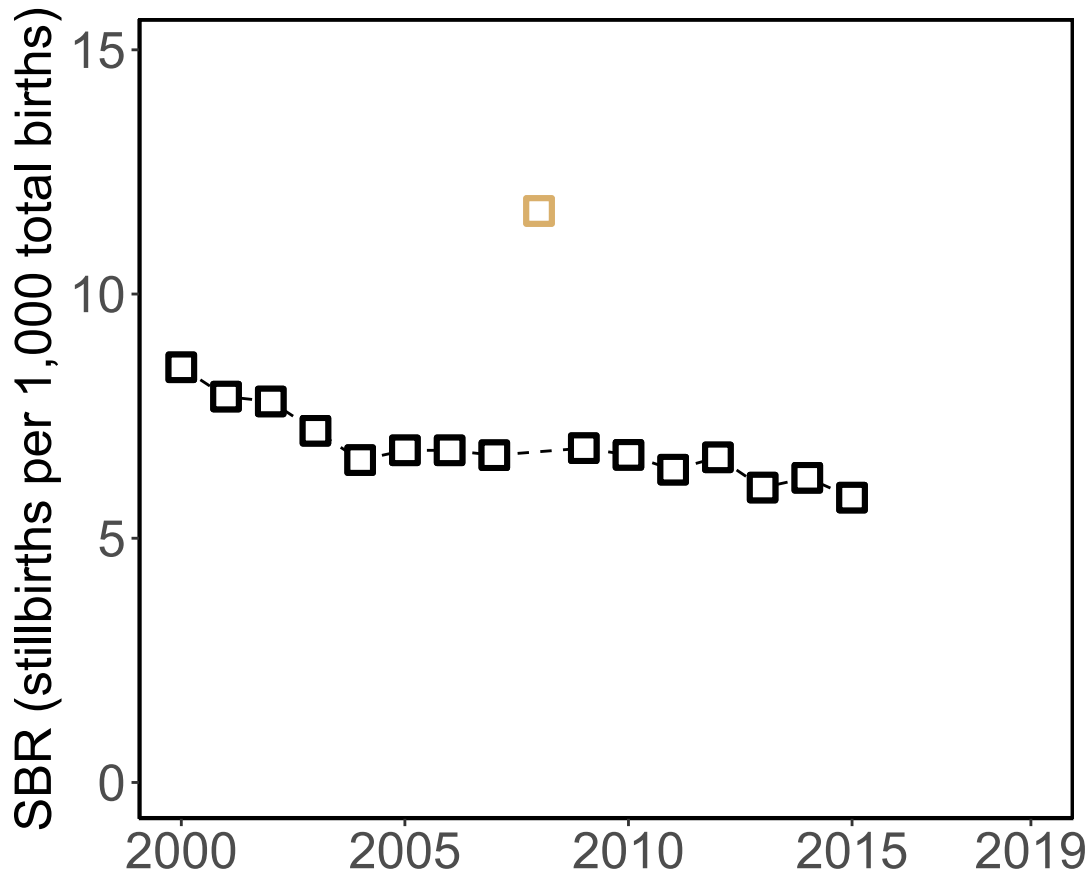

### '28+ Weeks of Gestation' Data (Incl. Adjusted Data)

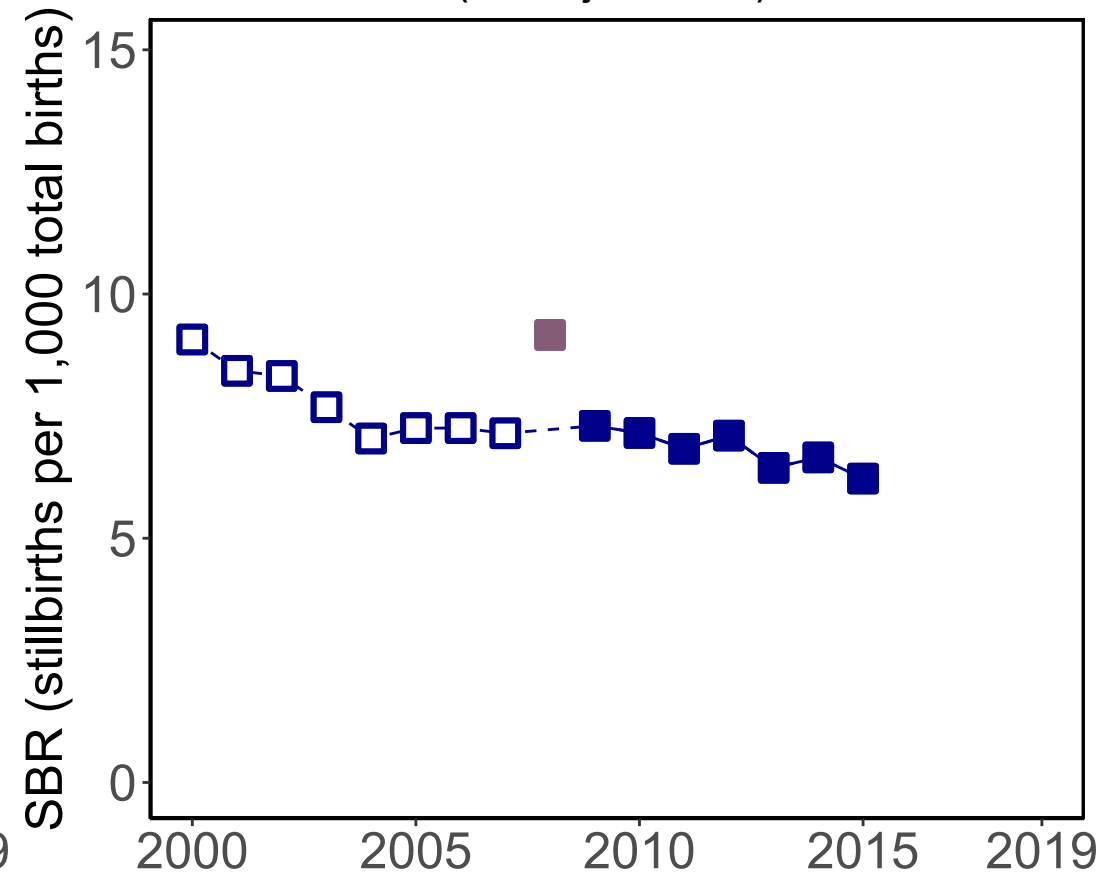

### Data Included in the Model

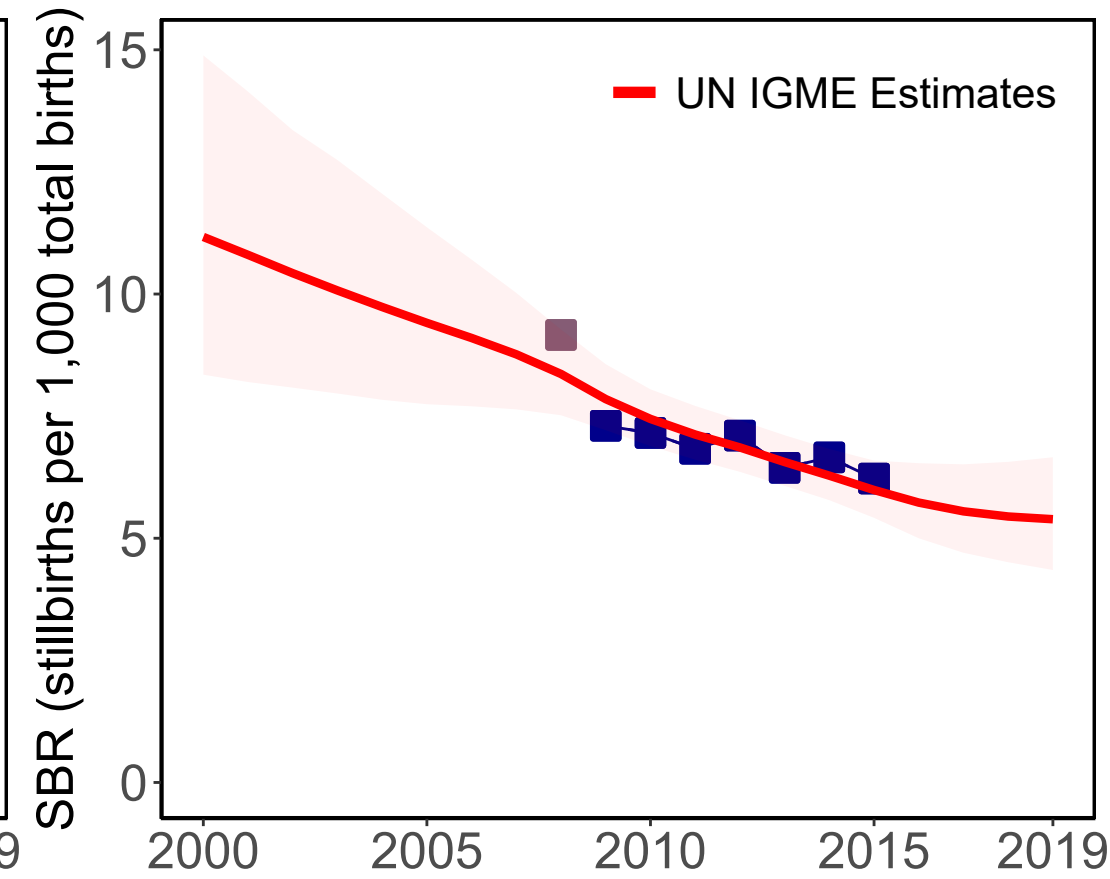

#### Source Types

Administrative

#### Data Sources

Vital Registration (28wks adj from 1000g)

Vital Registration (28wks adj from 500g)

Vital Registration (500g)

Vital Registration (1000g)

# Kenya

Available Data

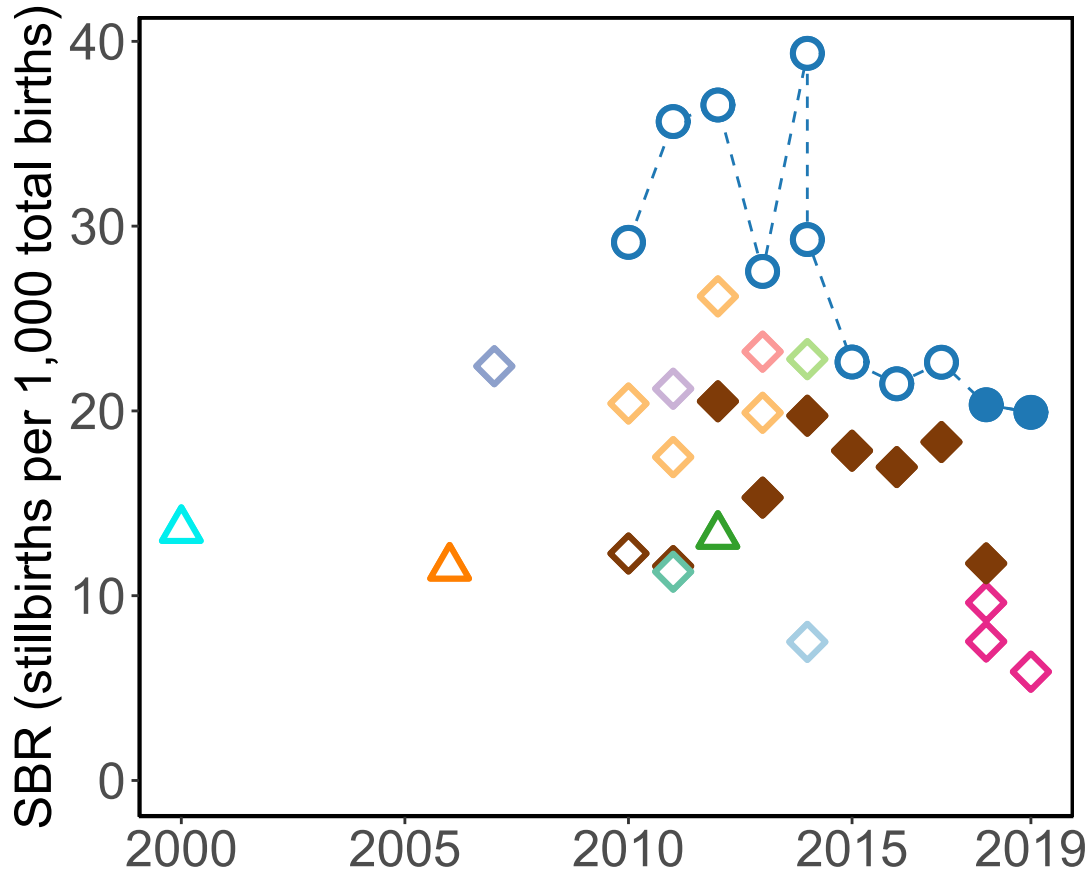

'28+ Weeks of Gestation' Data  
(Incl. Adjusted Data)

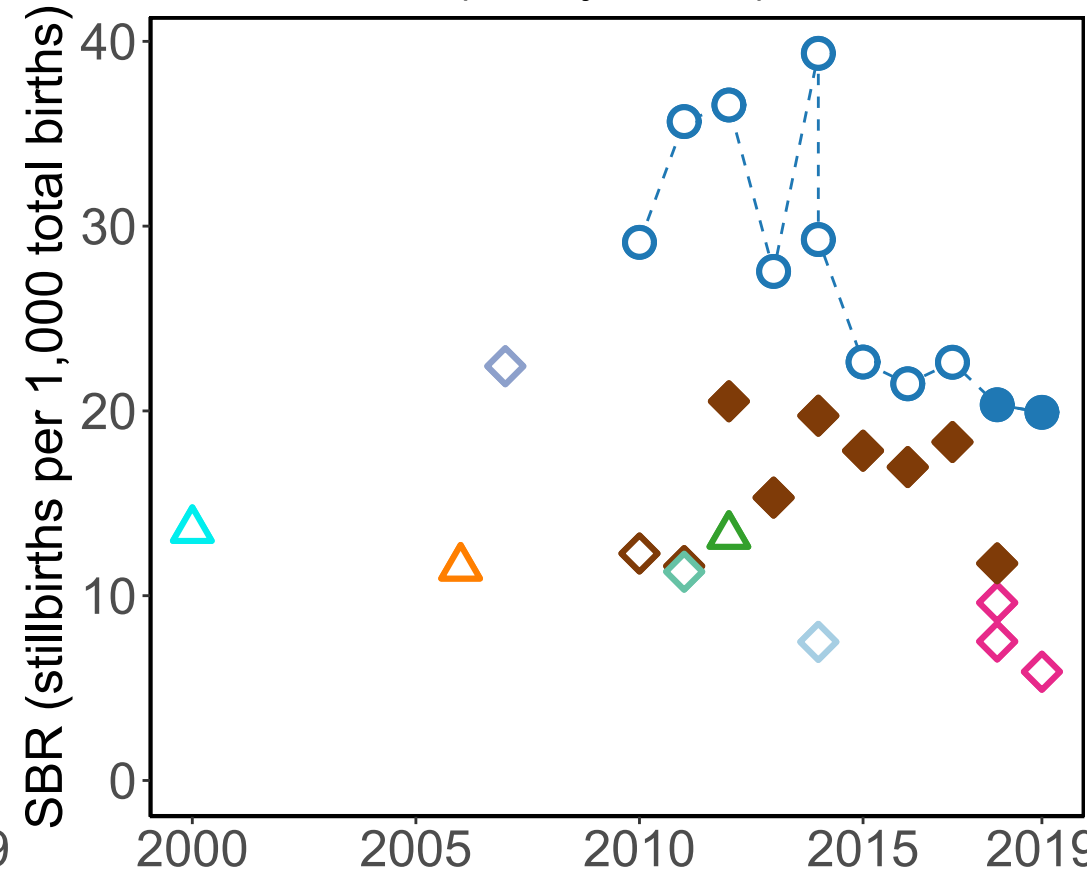

Data Included in the Model

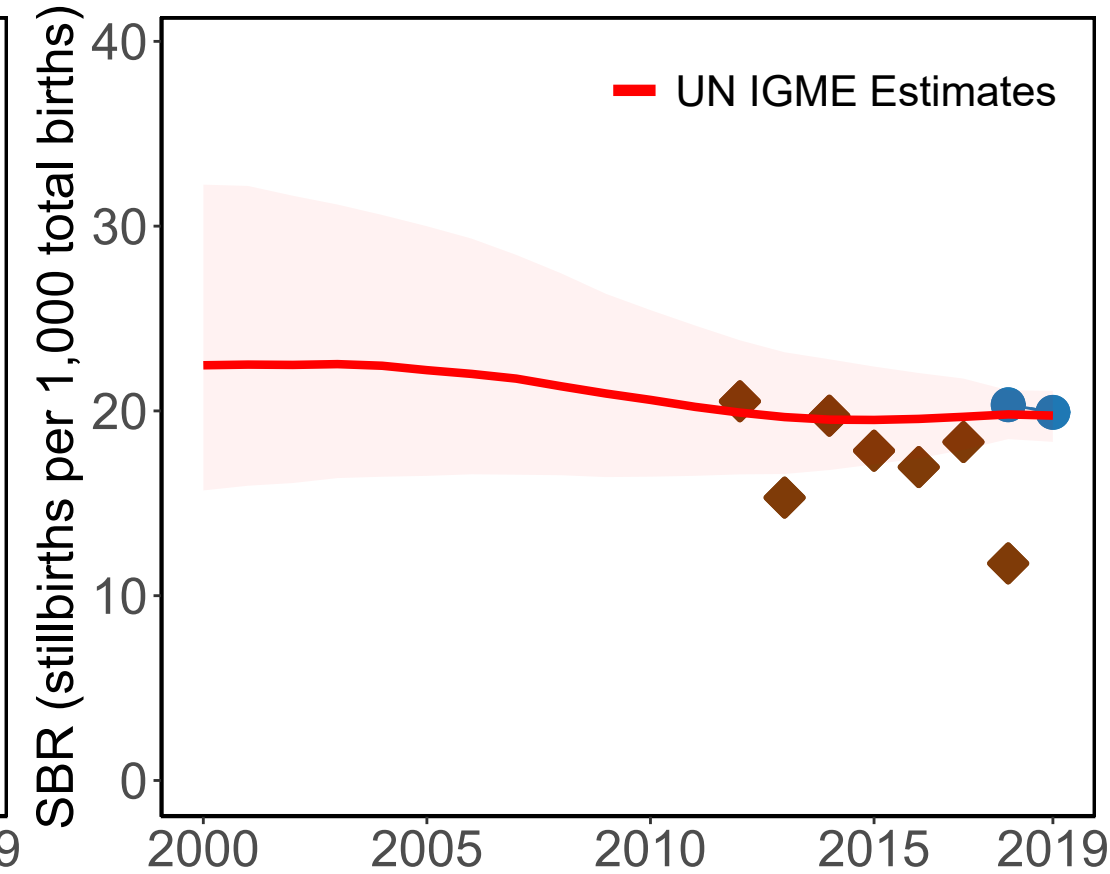

**Source Types**  
 ○ HMIS   △ Survey   ◇ Population study

**Data Sources**

- HMIS-DHIS2 (28wks)
- △ Demographic and Health Survey 2014 (DHS) (RC) (28wks)
- △ Demographic and Health Survey 2008-09 (DHS) (RC) (28wks)
- △ Demographic and Health Survey 2003 (DHS) (RC) (28wks)
- ◇ CHAMPS (28wks)
- ◆ Global Network Re-analysed (28wks)
- ◇ AMANHI 2018 (28wks)
- ◇ McClure 2018 (500g or 20wks)
- ◇ Creanga 2016 (20wks)
- ◇ McClure 2015 (500g or 20wks)
- ◇ Saleem 2014 (1000g and 28wks)
- ◇ Waiswa (28wks)
- ◇ McClure 2011 (28wks)

# Kyrgyzstan

Available Data

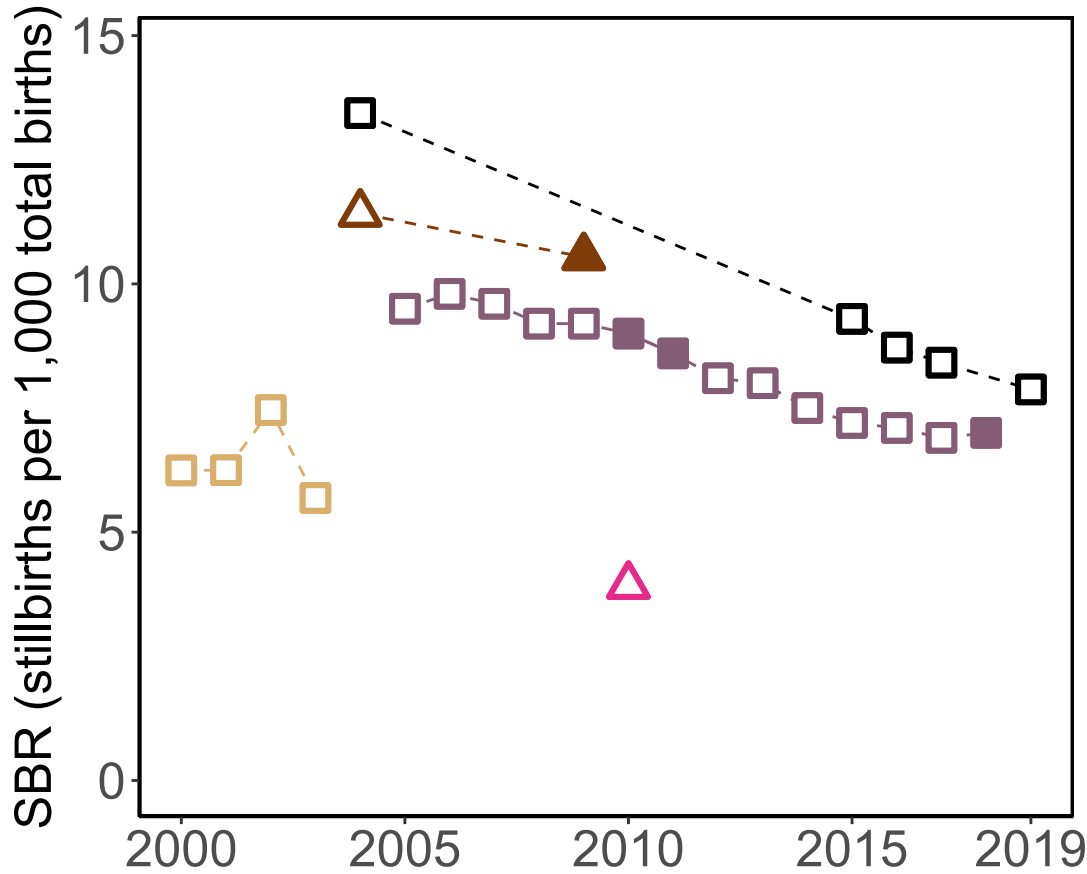

'28+ Weeks of Gestation' Data  
(Incl. Adjusted Data)

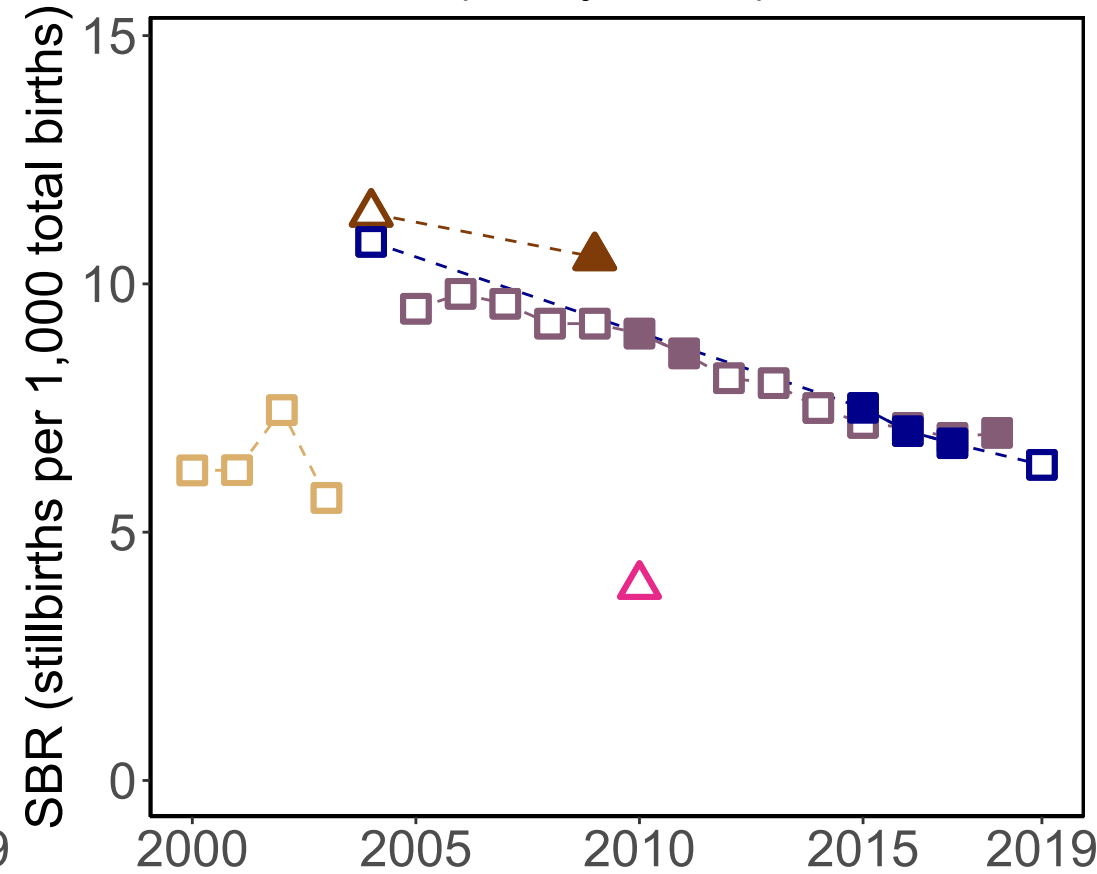

Data Included in the Model

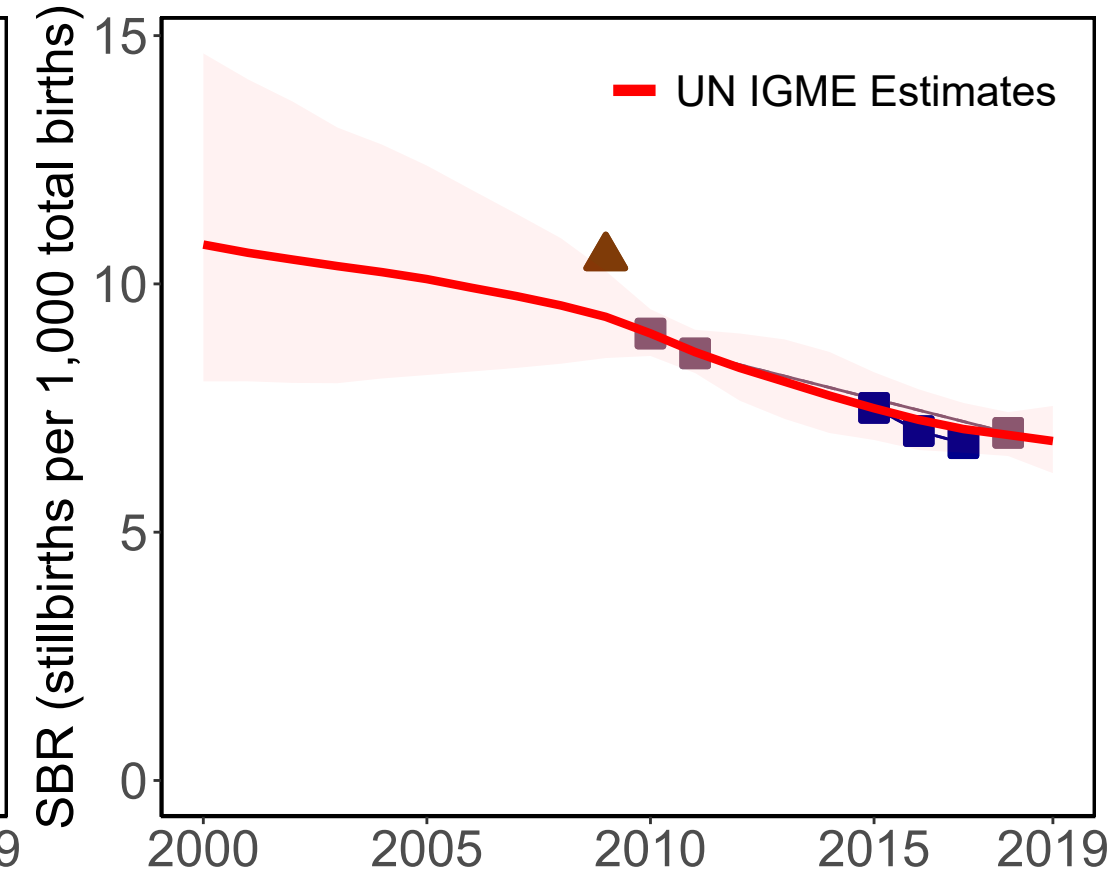

Source Types

□ Administrative    △ Survey

Data Sources

□ Vital Registration (22wks)      ■ Birth or Death Registry (28wks)      △ Demographic and Health Survey 2012 (DHS) (RC) (28wks)  
 ■ Vital Registration (28wks adj from 22wks)      □ Vital Registration (28wks)      ■ Demographic and Health Survey 2012 (DHS) (PH) (28wks)

# Cambodia

### Available Data

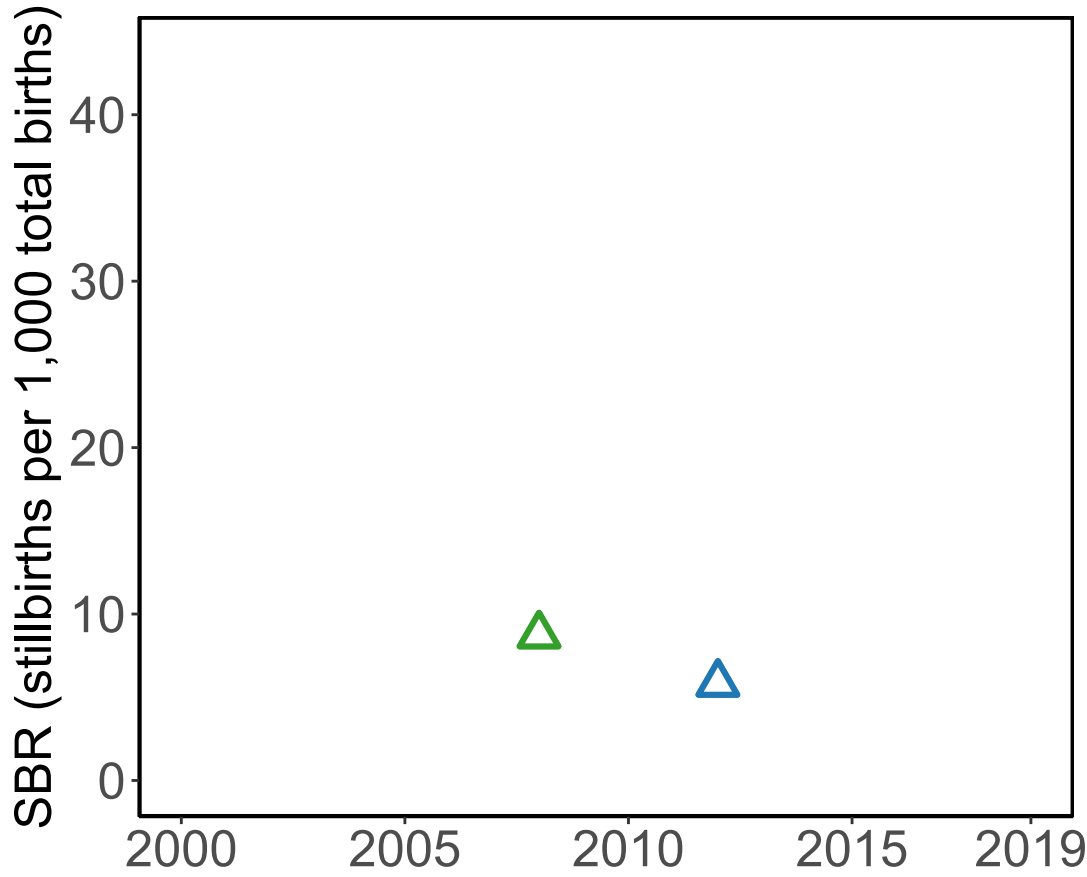

### '28+ Weeks of Gestation' Data (Incl. Adjusted Data)

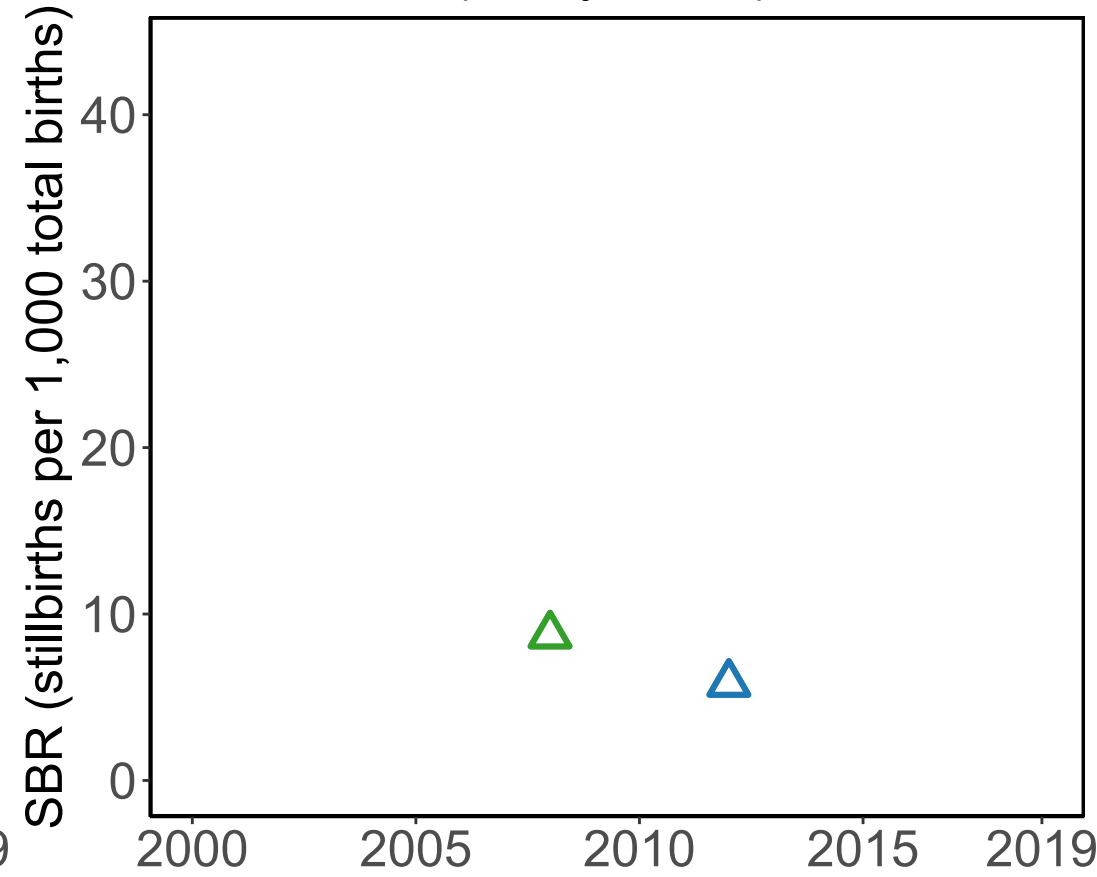

### Data Included in the Model

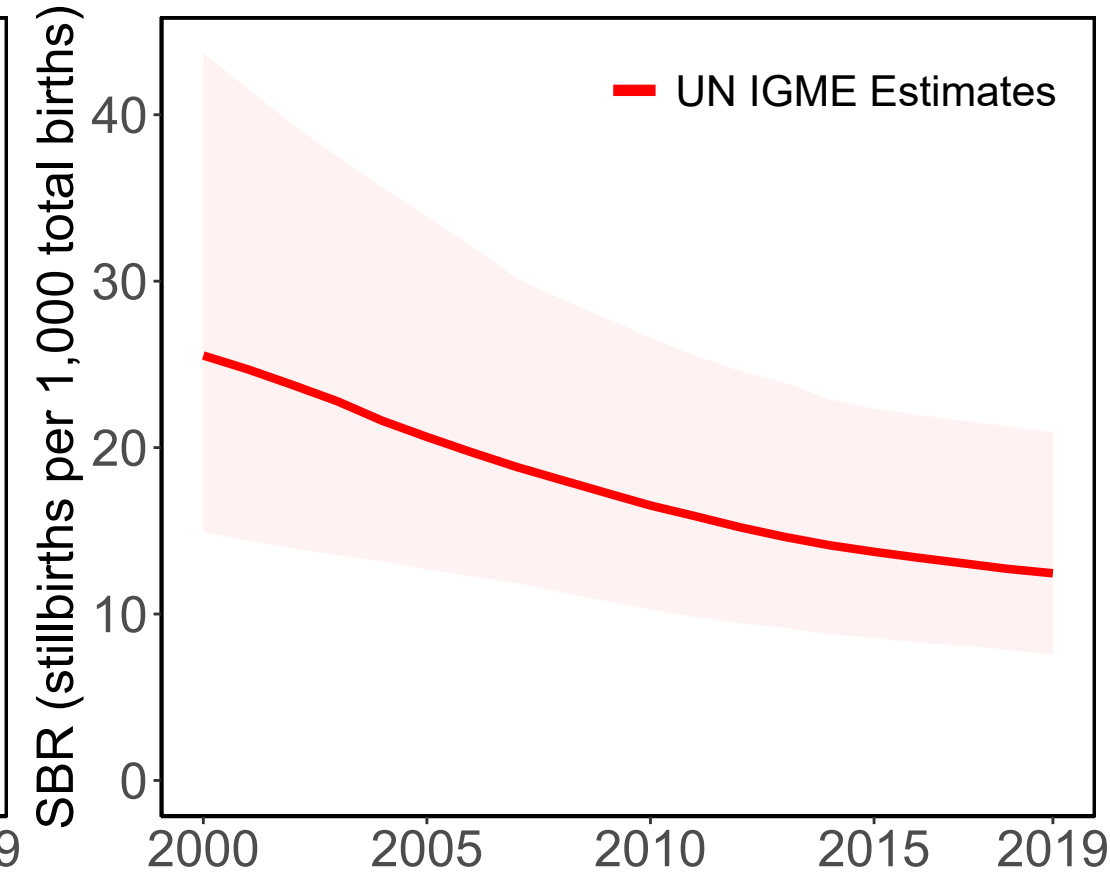

#### Source Types



Survey

#### Data Sources

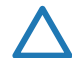

Demographic and Health Survey 2014 (DHS) (RC) (28wks)

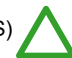

Demographic and Health Survey 2010 (DHS) (RC) (28wks)

# Kiribati

Available Data

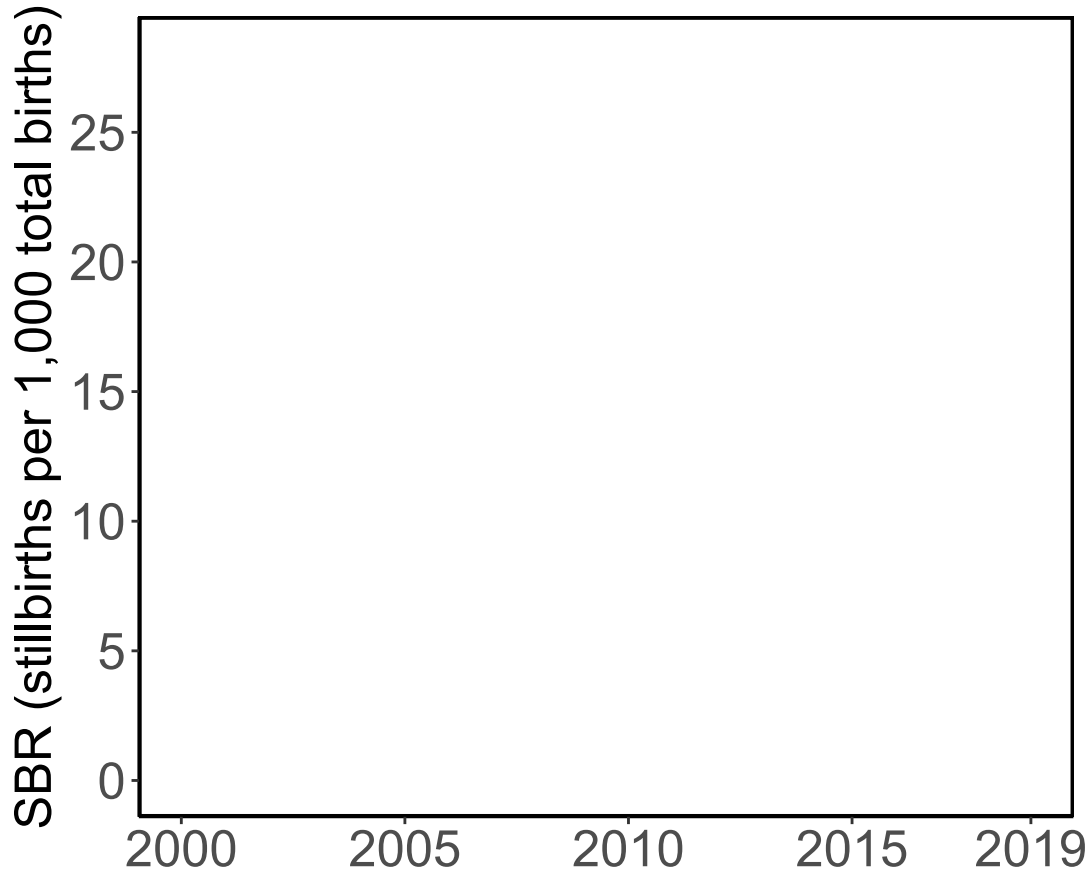

'28+ Weeks of Gestation' Data  
(Incl. Adjusted Data)

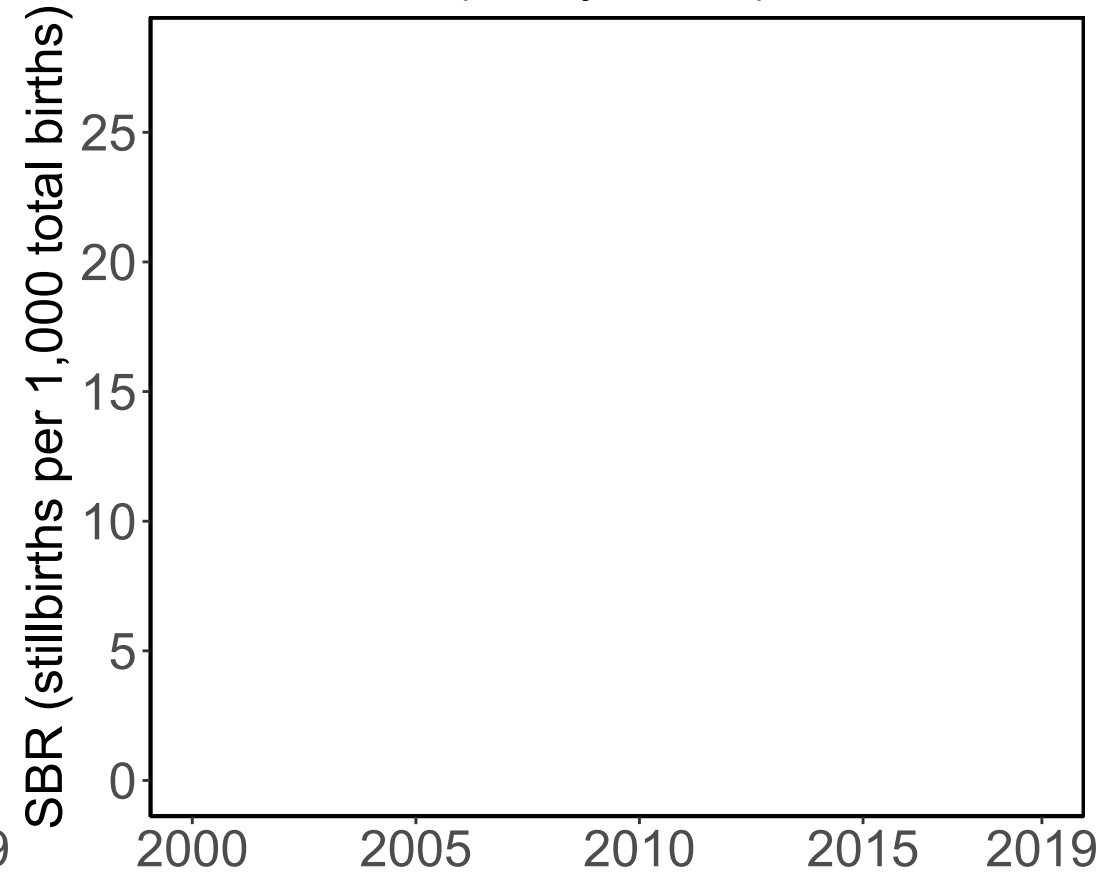

Data Included in the Model

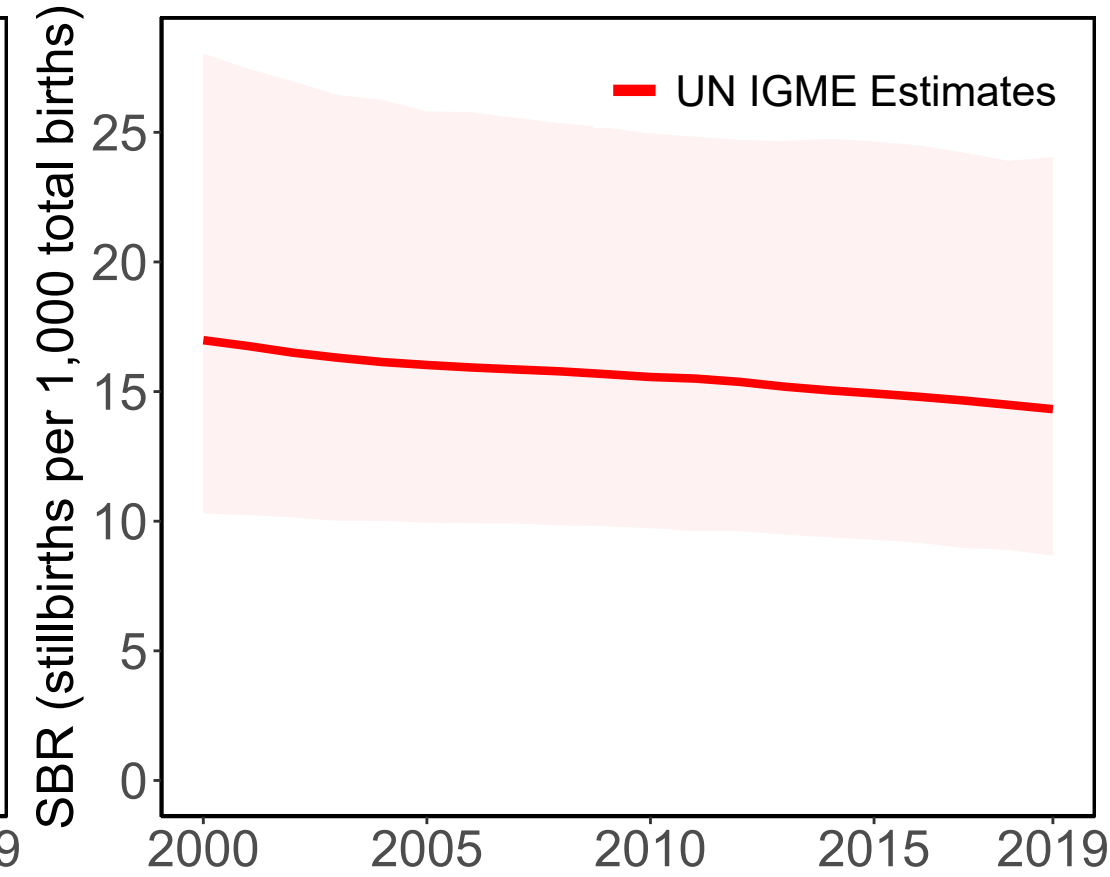



# Saint Kitts and Nevis

Available Data

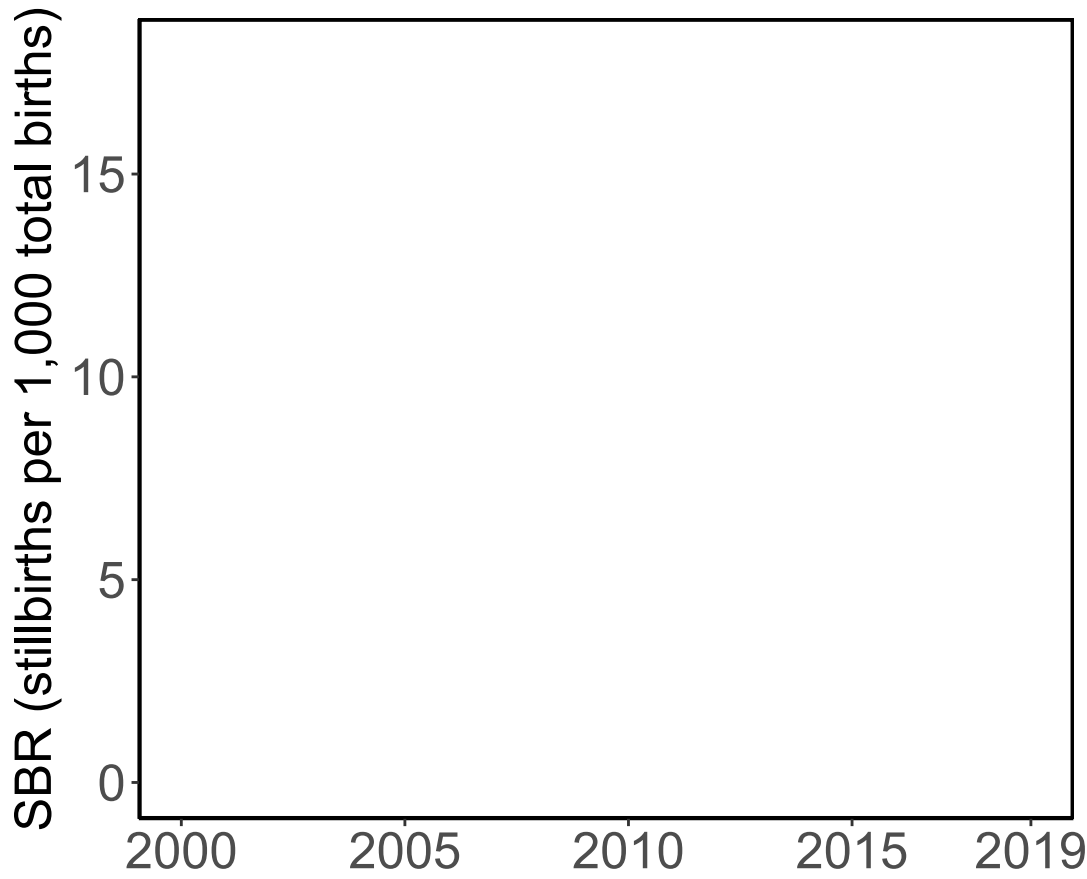

'28+ Weeks of Gestation' Data  
(Incl. Adjusted Data)

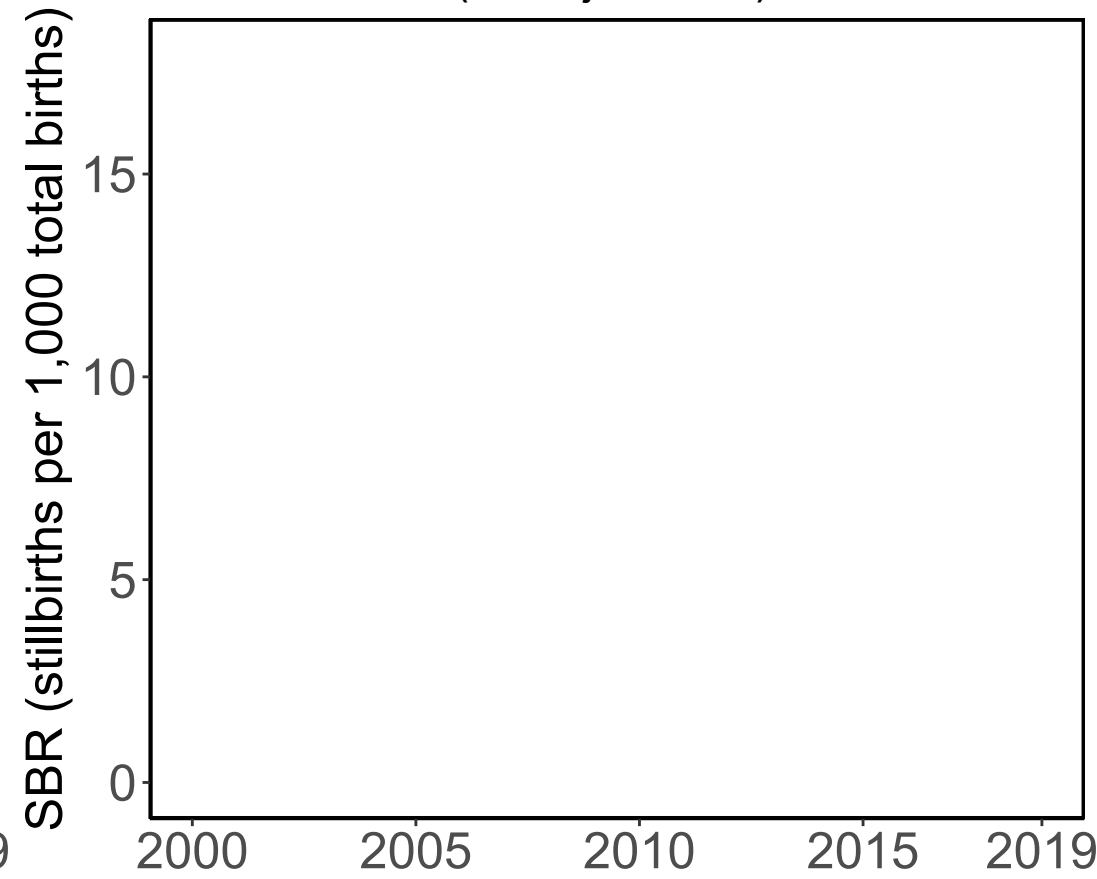

Data Included in the Model

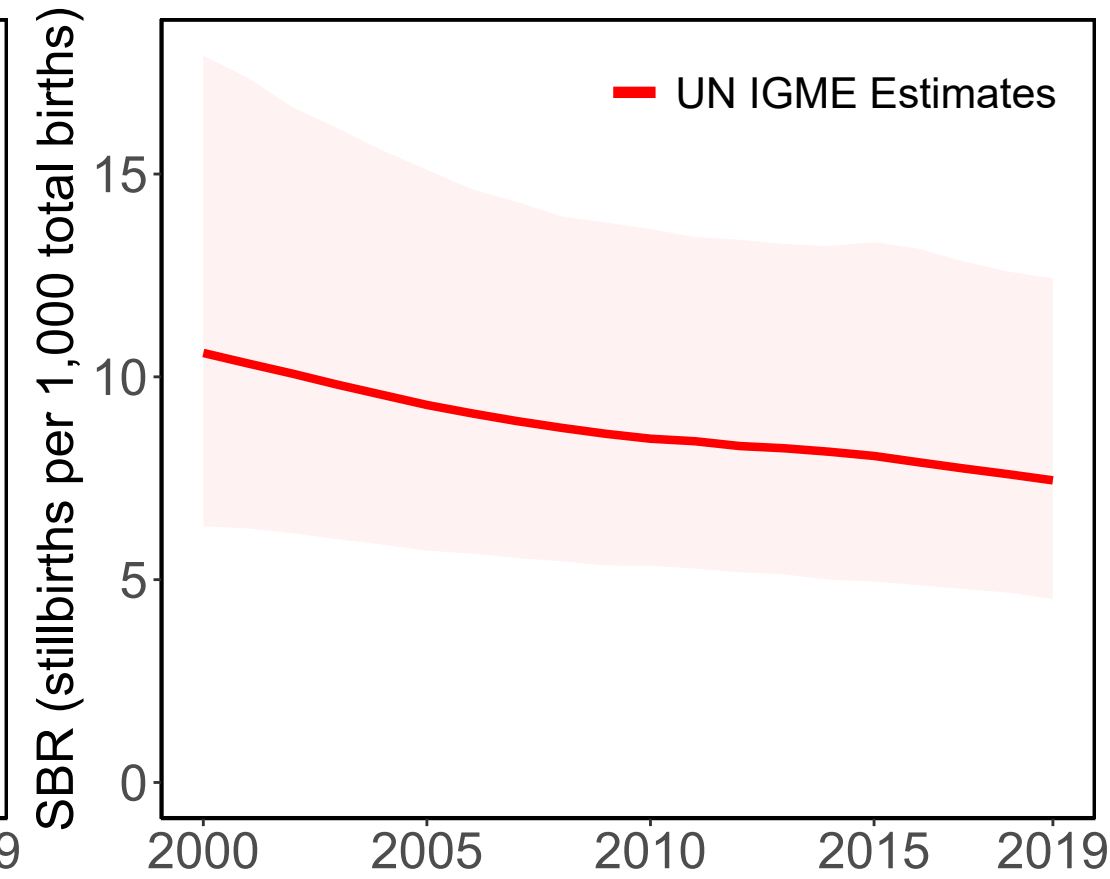

# Republic of Korea

### Available Data

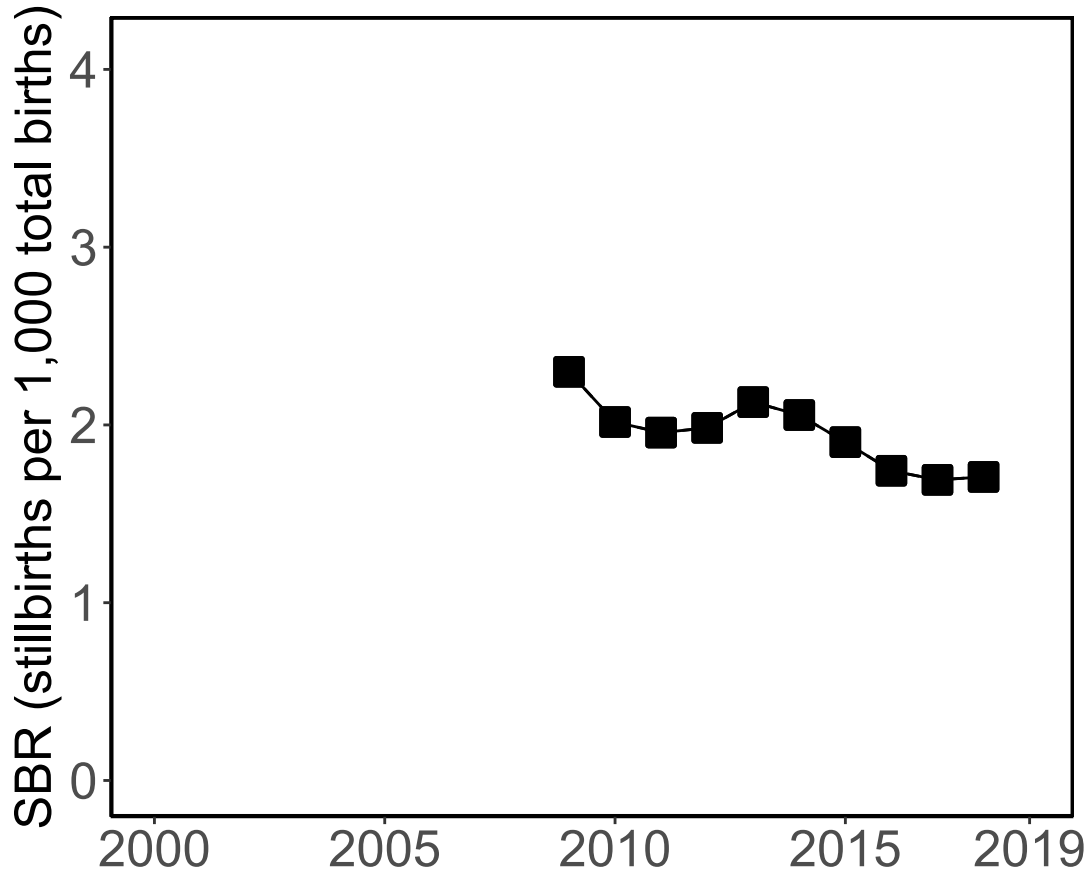

### '28+ Weeks of Gestation' Data (Incl. Adjusted Data)

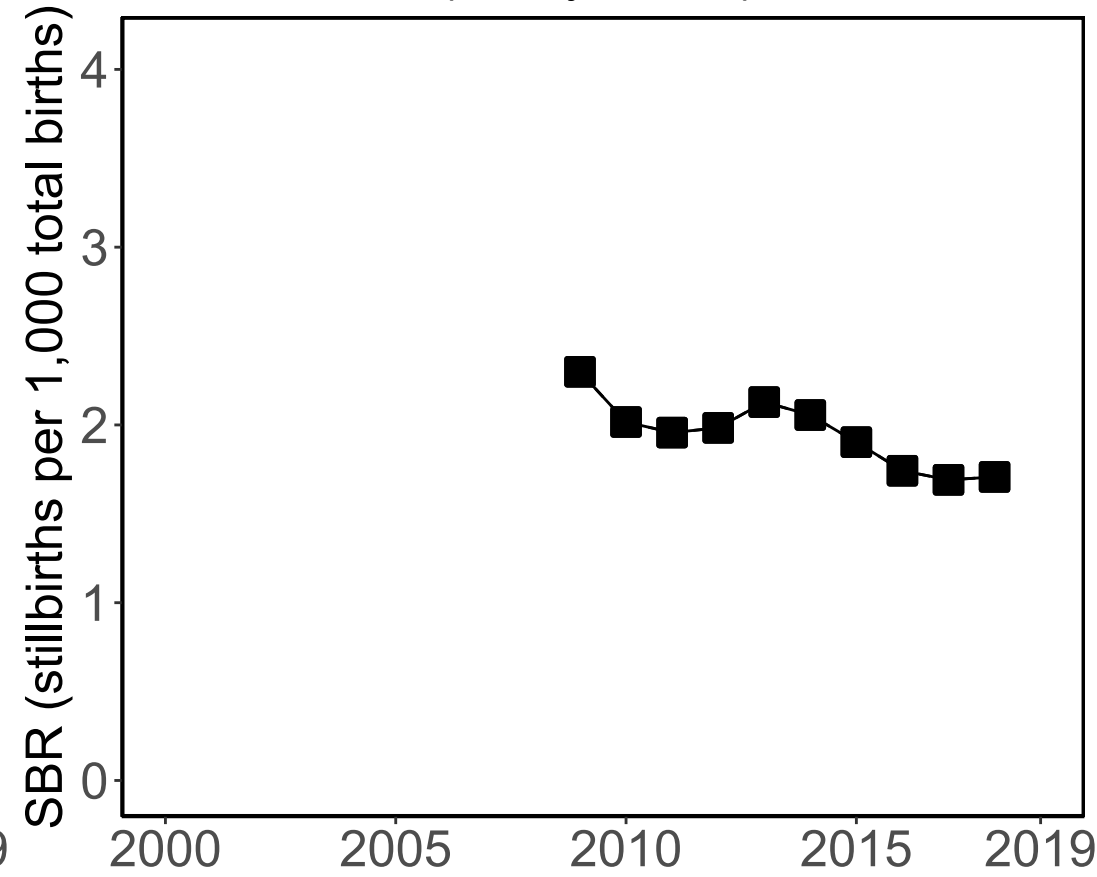

### Data Included in the Model

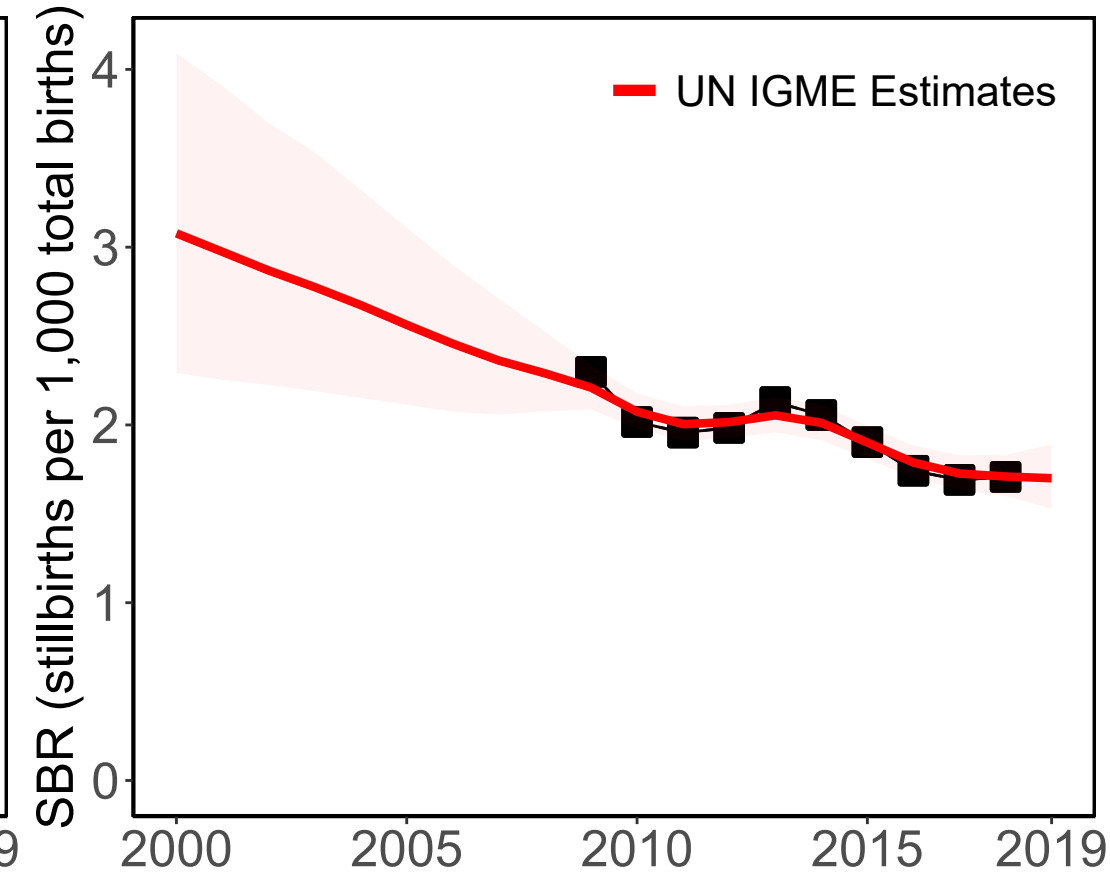

#### Source Types

Administrative

#### Data Sources

Vital Registration (28wks)

# Kuwait

### Available Data

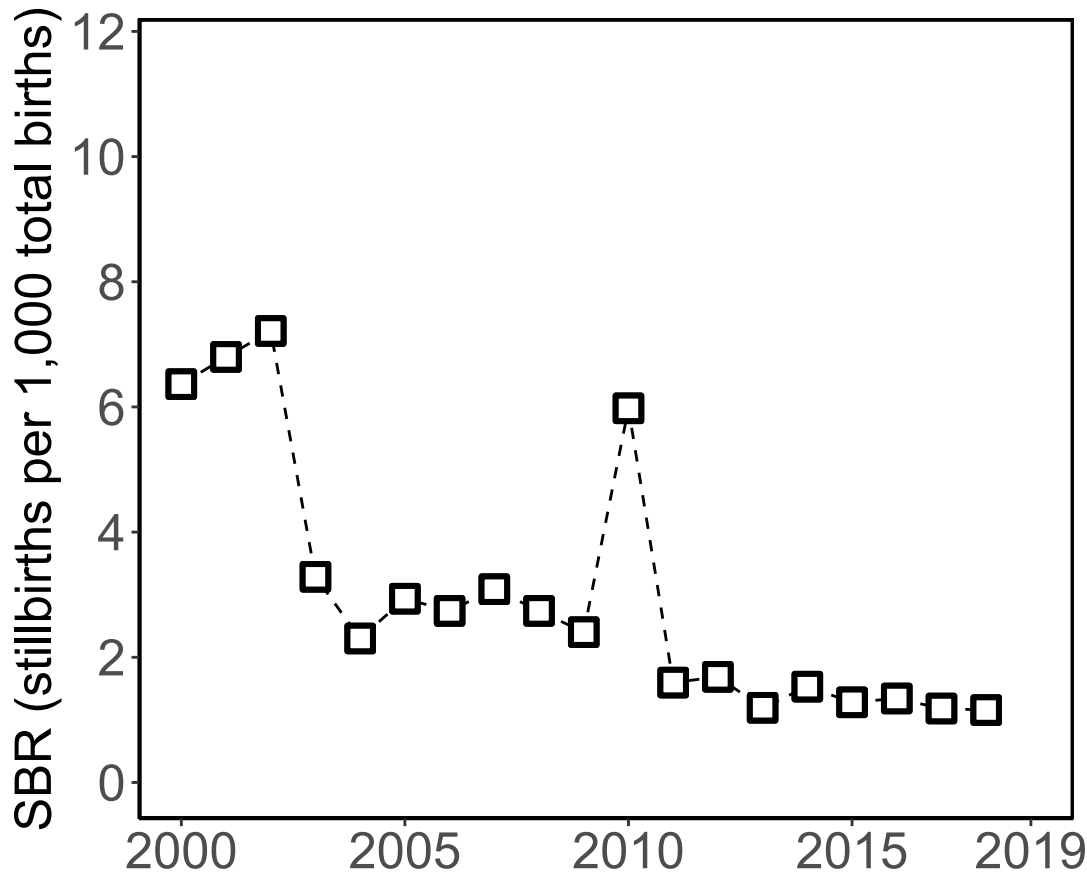

### '28+ Weeks of Gestation' Data (Incl. Adjusted Data)

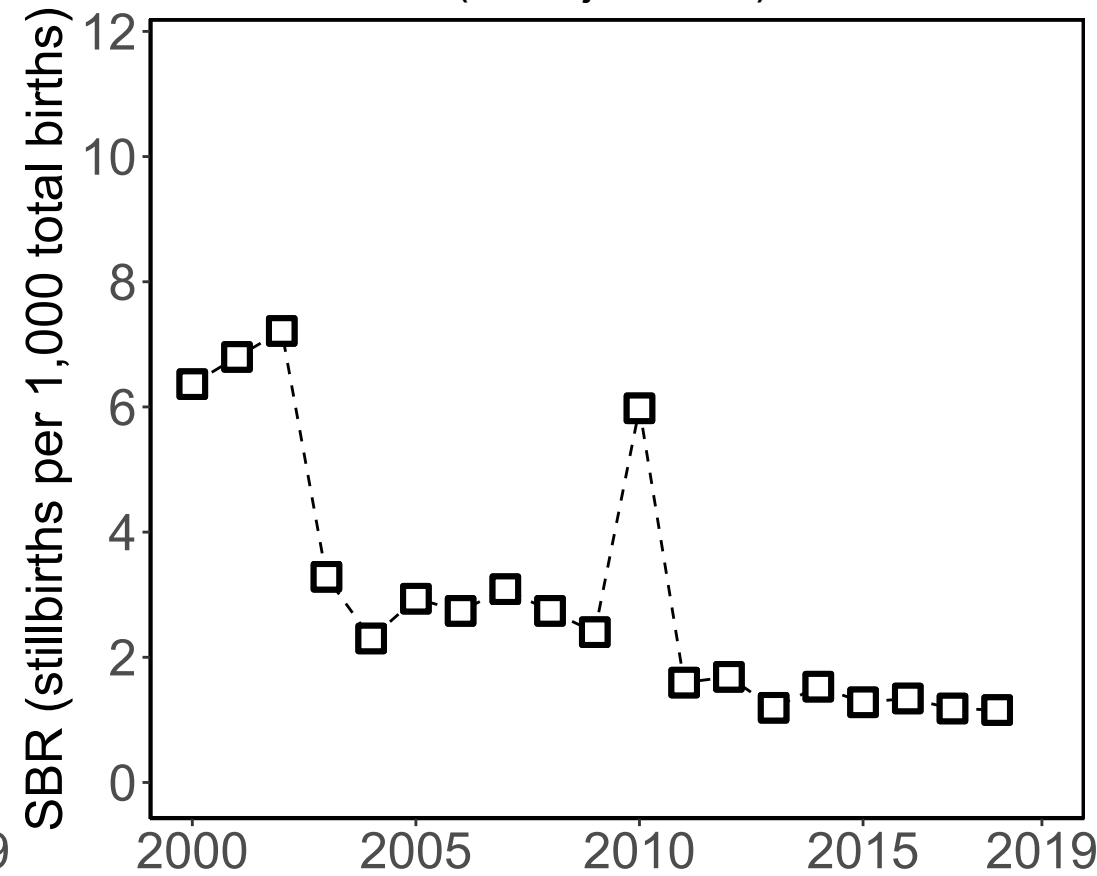

### Data Included in the Model

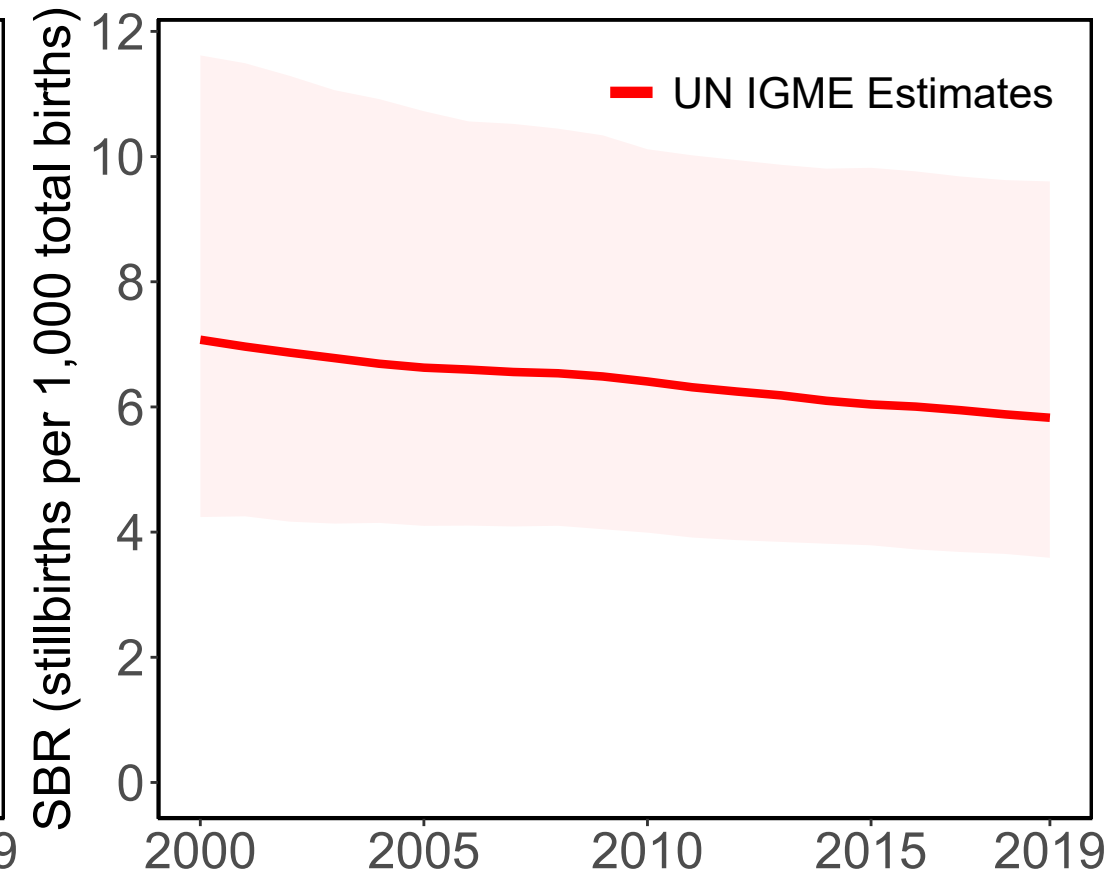

#### Source Types

Administrative

#### Data Sources

Vital Registration (28wks)

# Lao People's Democratic Republic

## Available Data

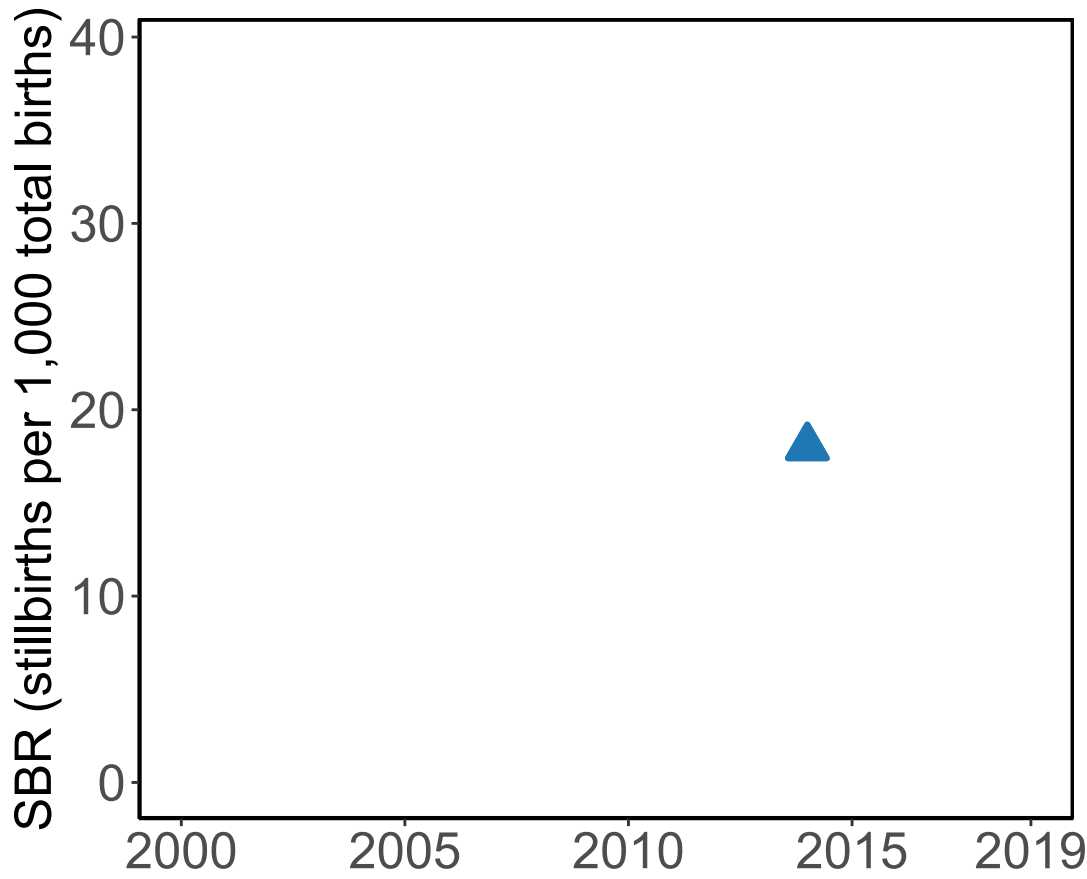

## '28+ Weeks of Gestation' Data (Incl. Adjusted Data)

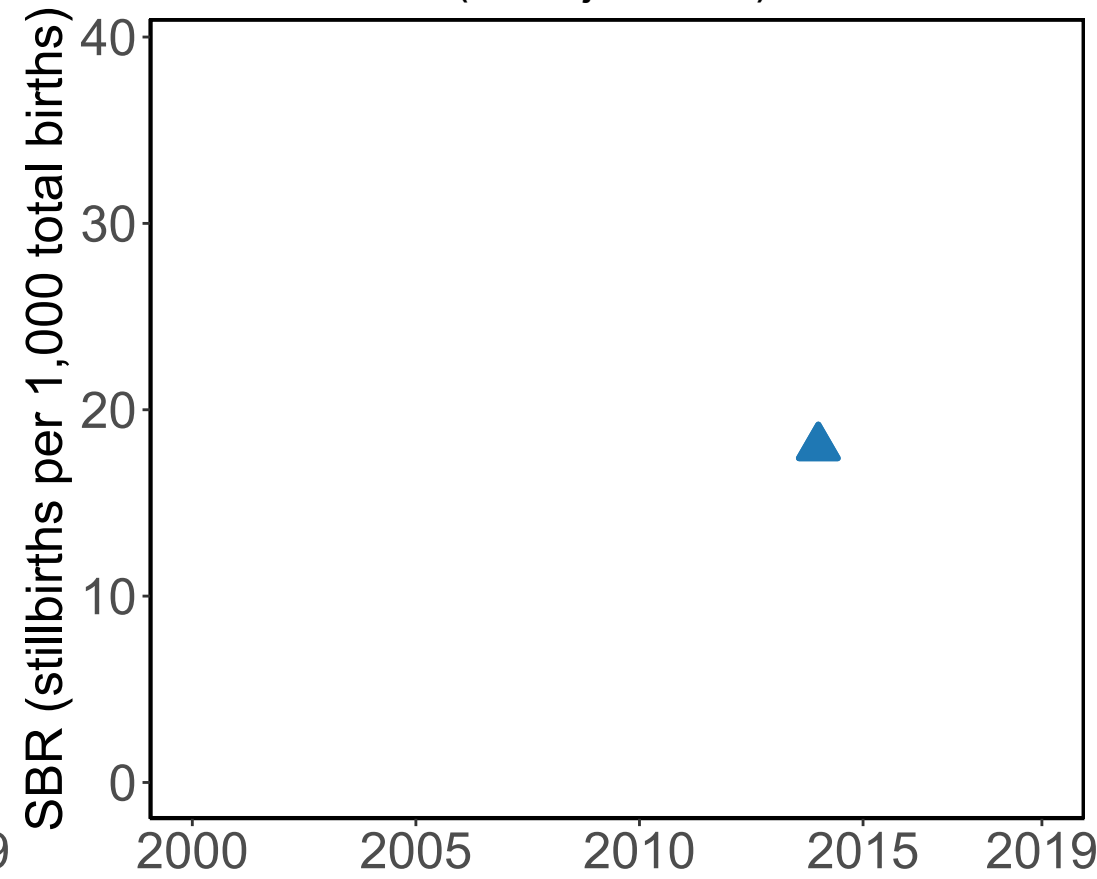

## Data Included in the Model

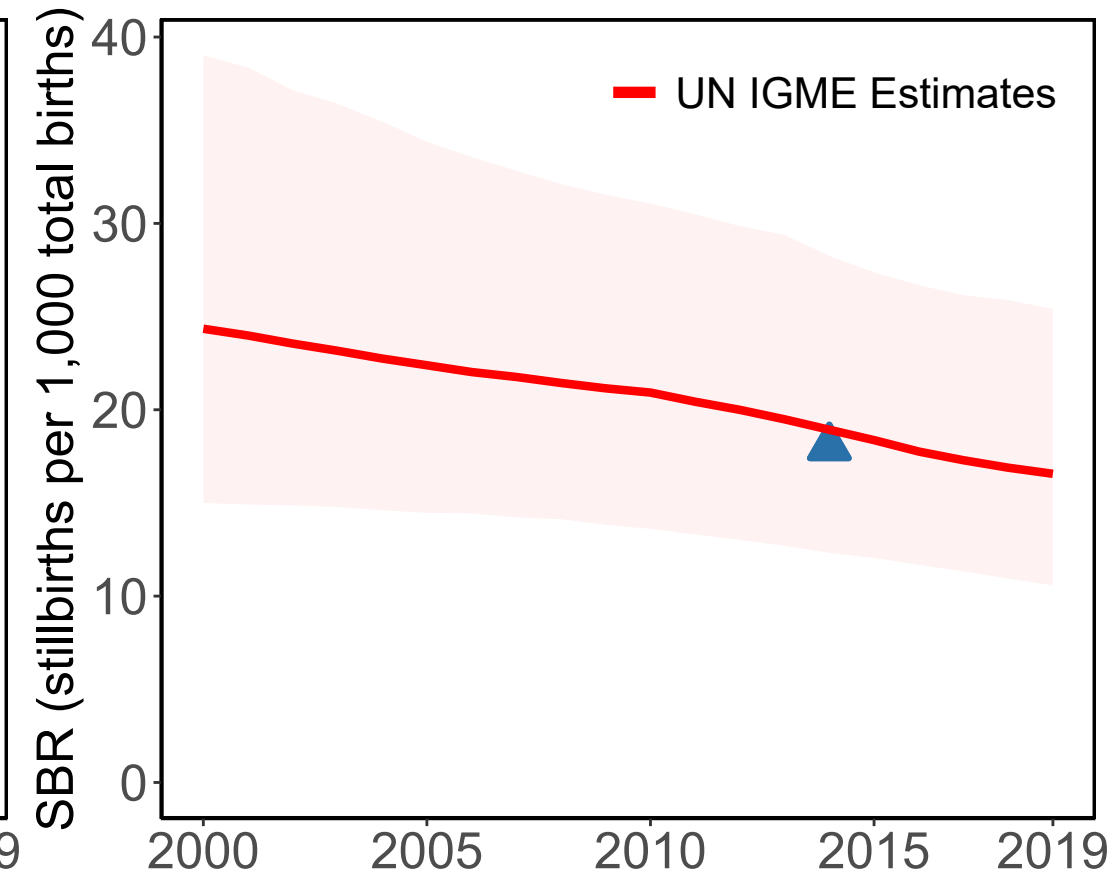

### Source Types



Survey

### Data Sources

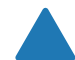

The Lao Social Indicator Survey LSIS II 2017  
(MICS) (RC) (28wks)

# Lebanon

### Available Data

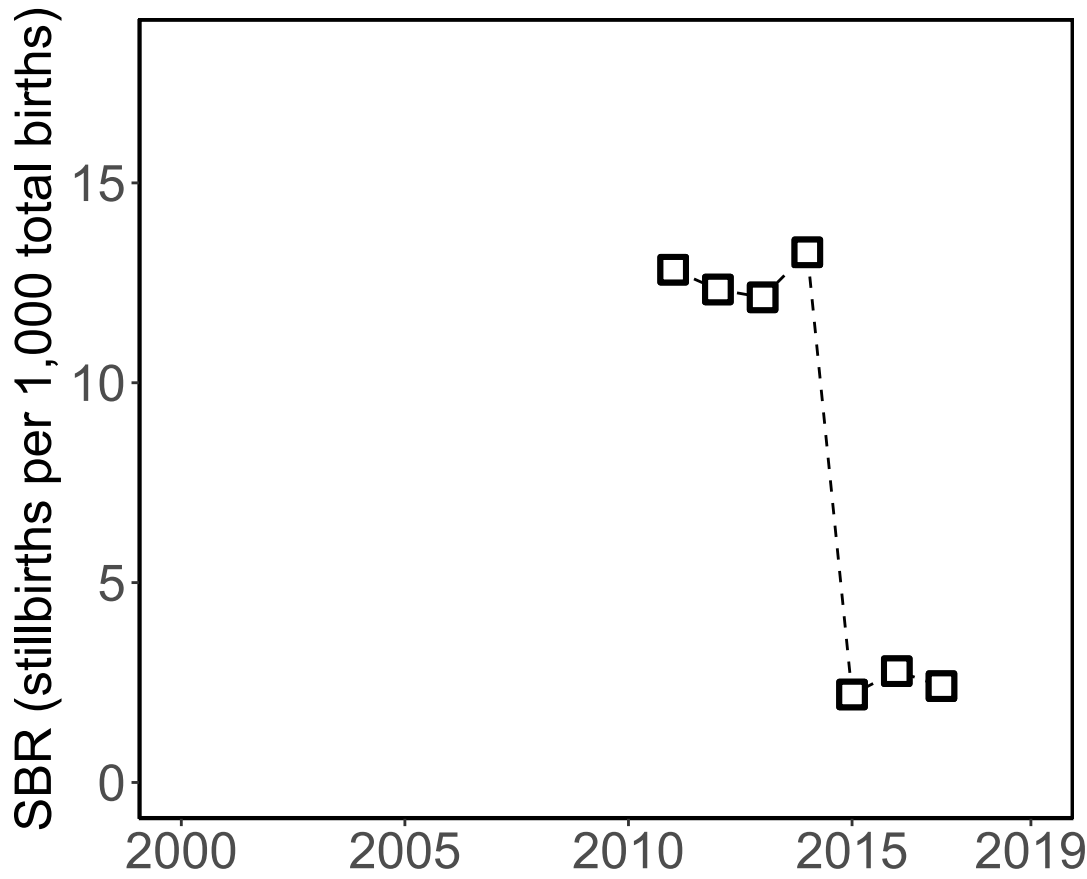

### '28+ Weeks of Gestation' Data (Incl. Adjusted Data)

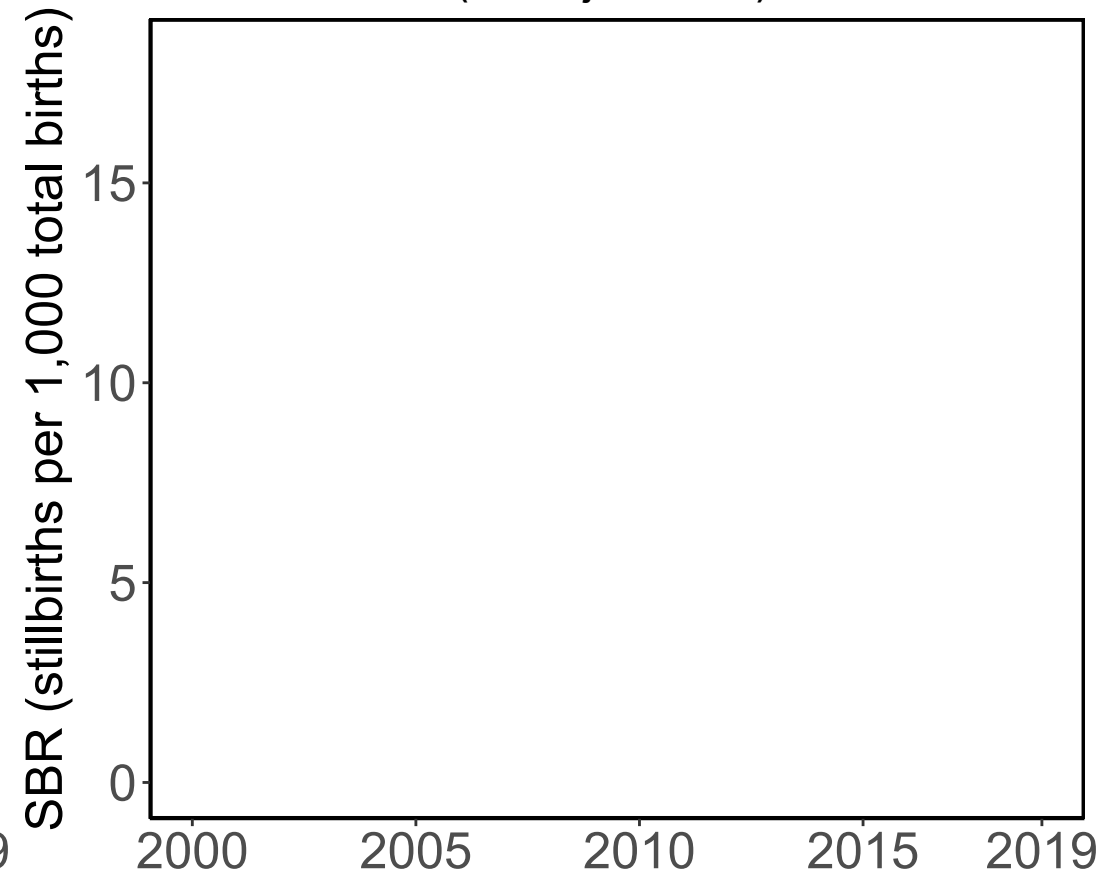

### Data Included in the Model

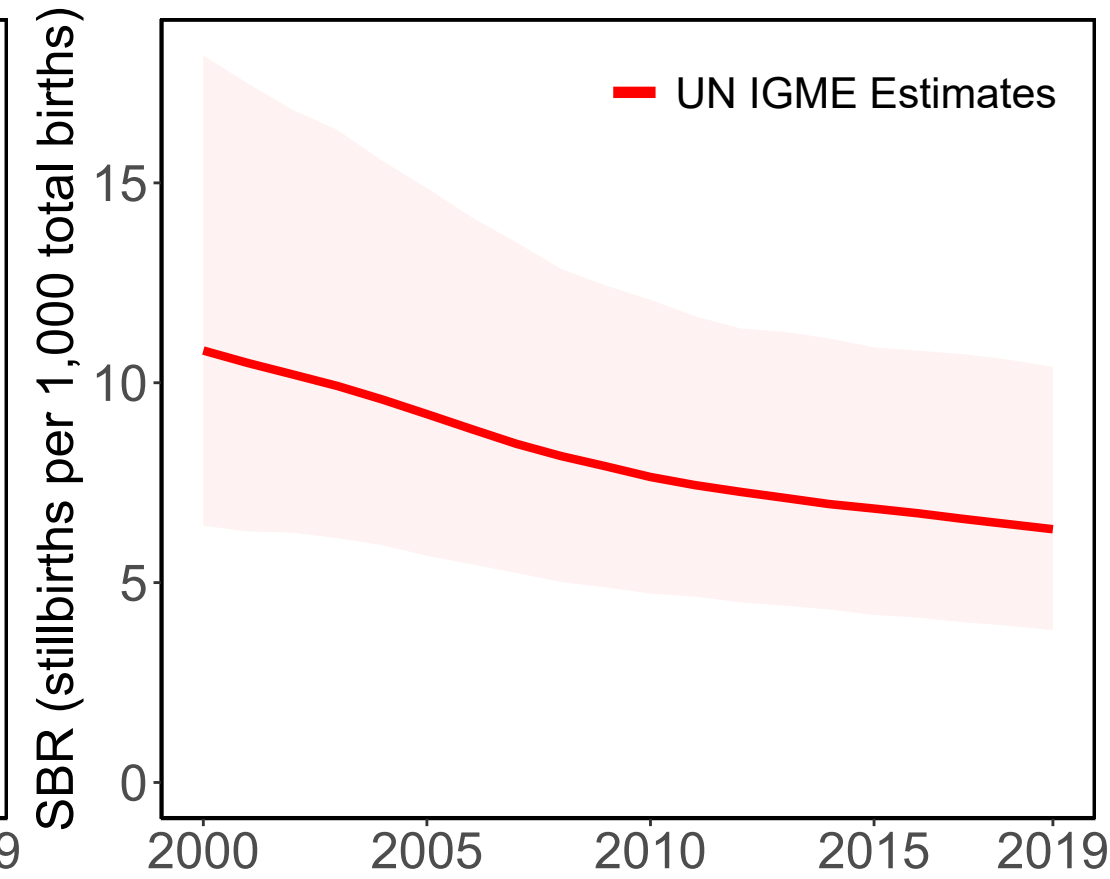

#### Source Types

□ Administrative

#### Data Sources

□ Birth or Death Registry (any gestational age or birthweight)

# Liberia

### Available Data

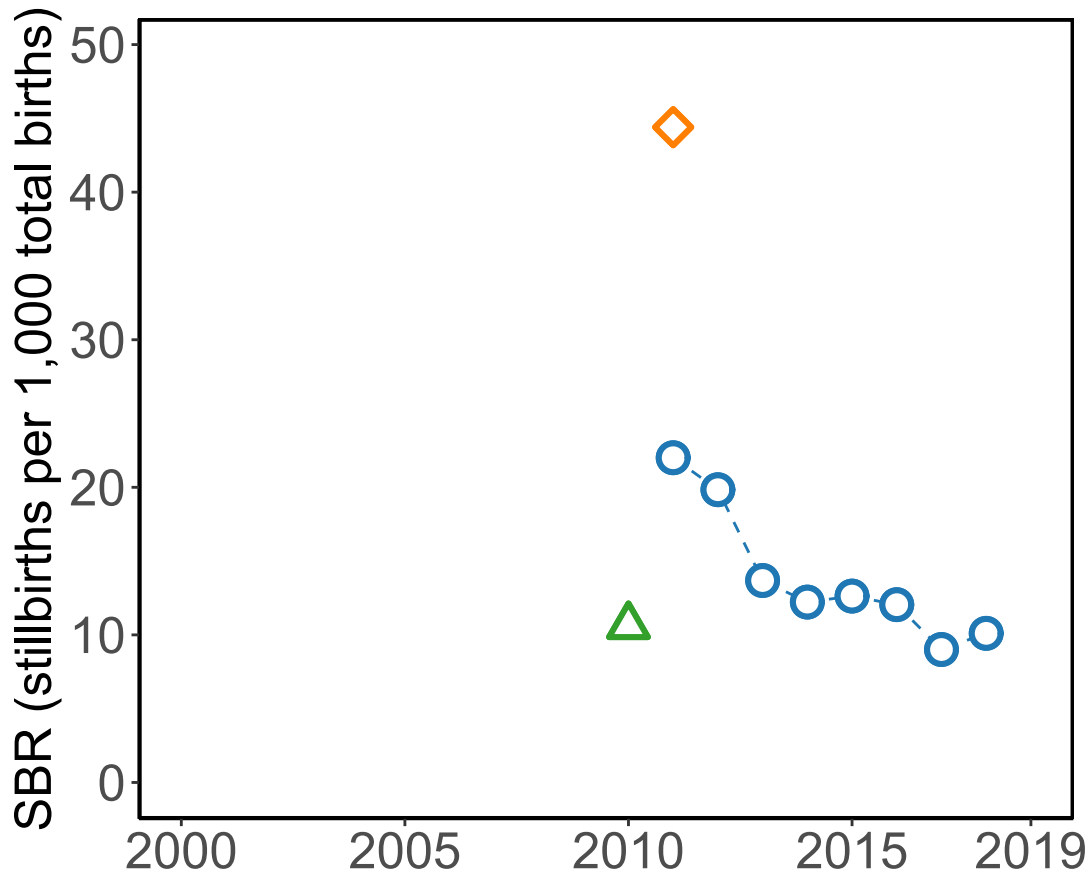

### '28+ Weeks of Gestation' Data (Incl. Adjusted Data)

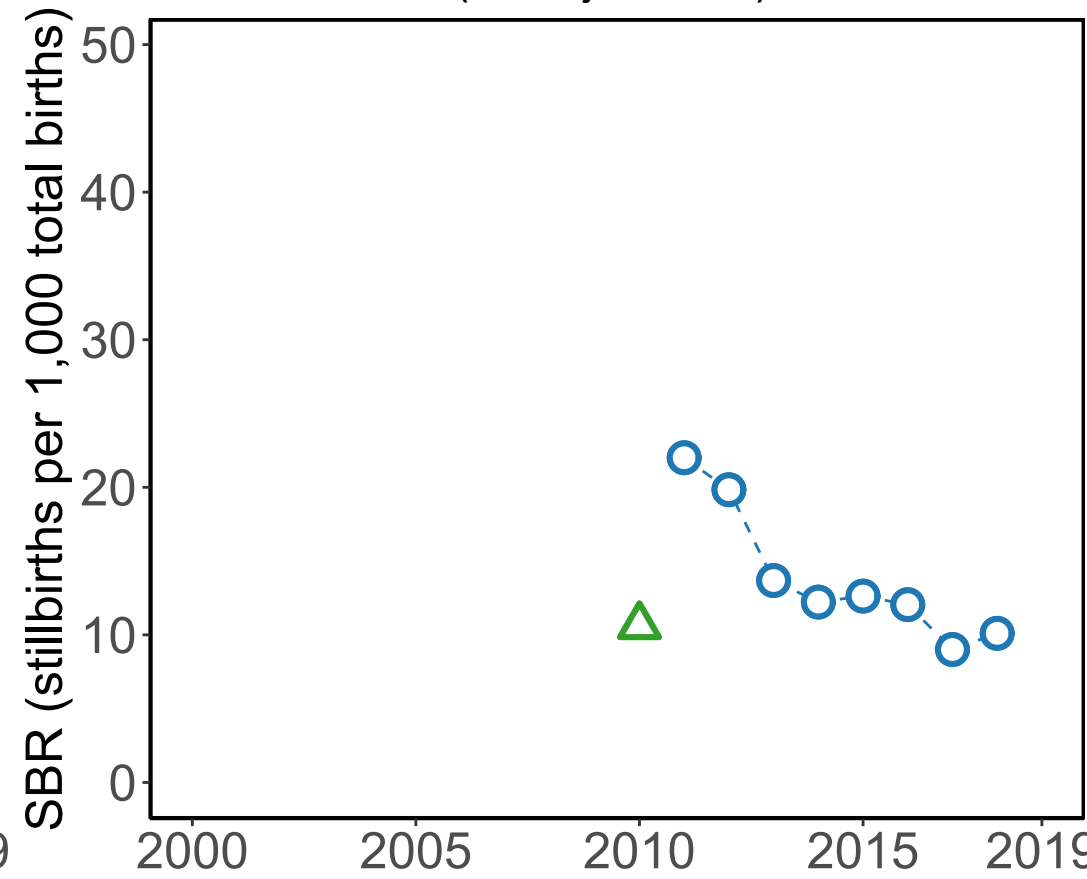

### Data Included in the Model

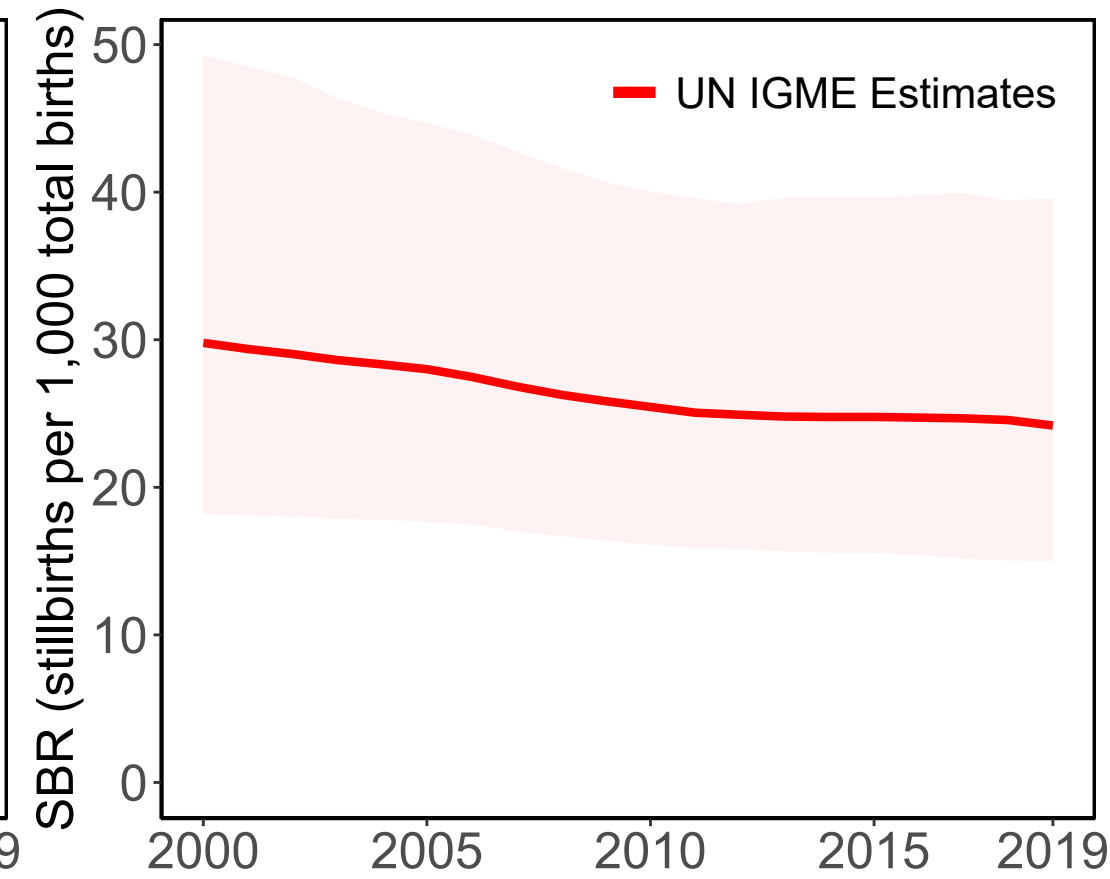

#### Source Types

○ HMIS   △ Survey   ◇ Population study

#### Data Sources

○ HMIS-DHIS2 (28wks)

△ Demographic and Health Survey 2013 (DHS) (RC) (28wks)

◇ Moseson 2014 (1000g and 28wks)

# Libya

Available Data

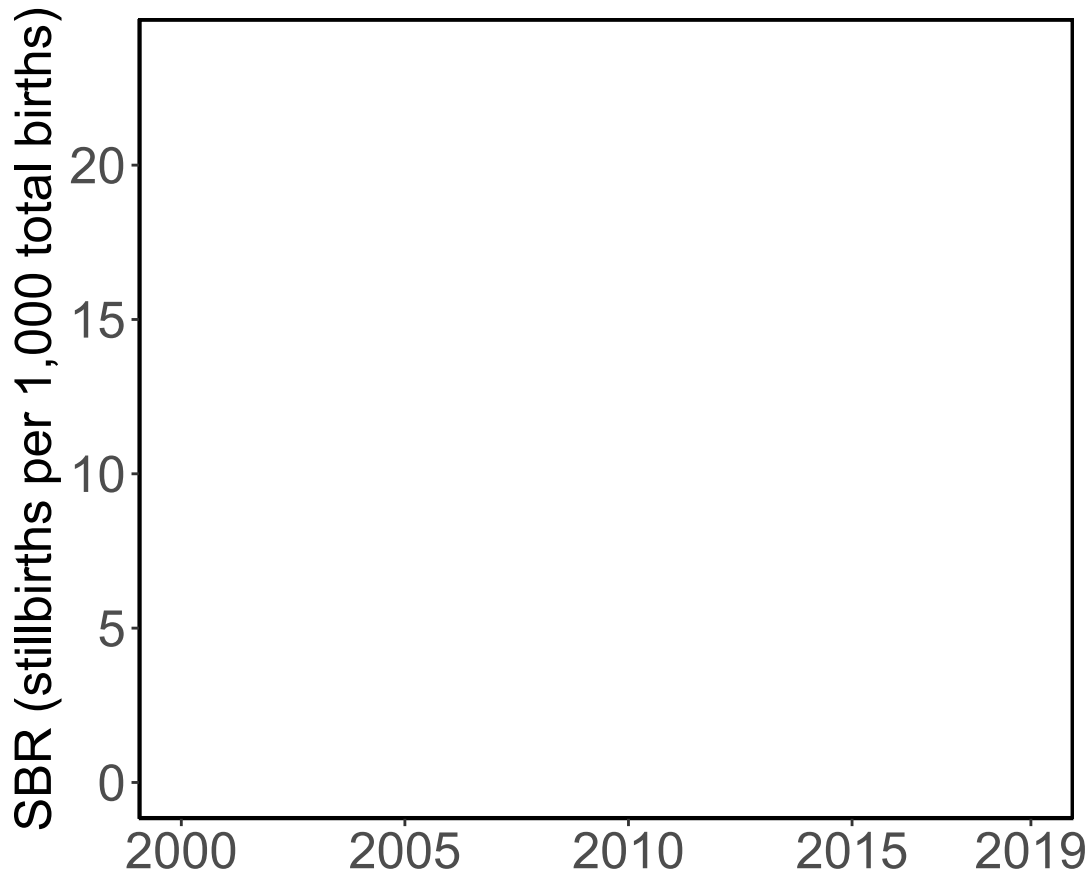

'28+ Weeks of Gestation' Data  
(Incl. Adjusted Data)

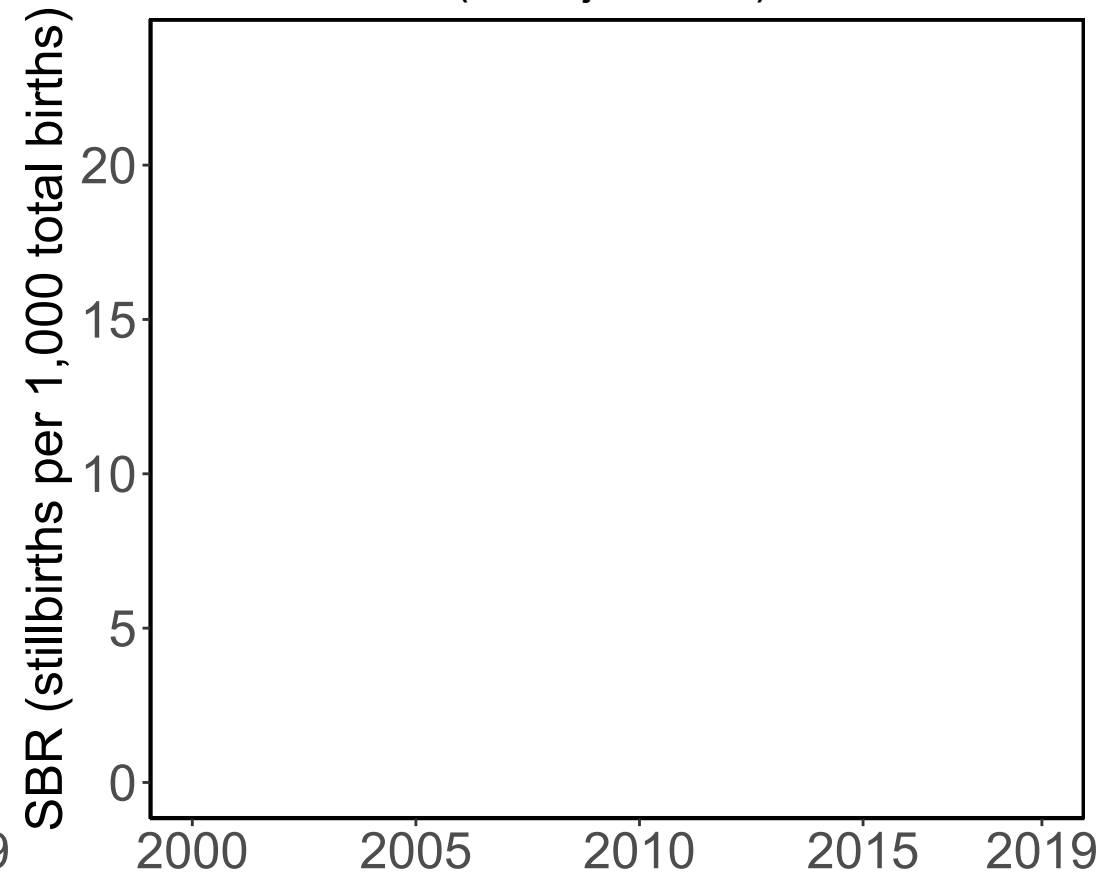

Data Included in the Model

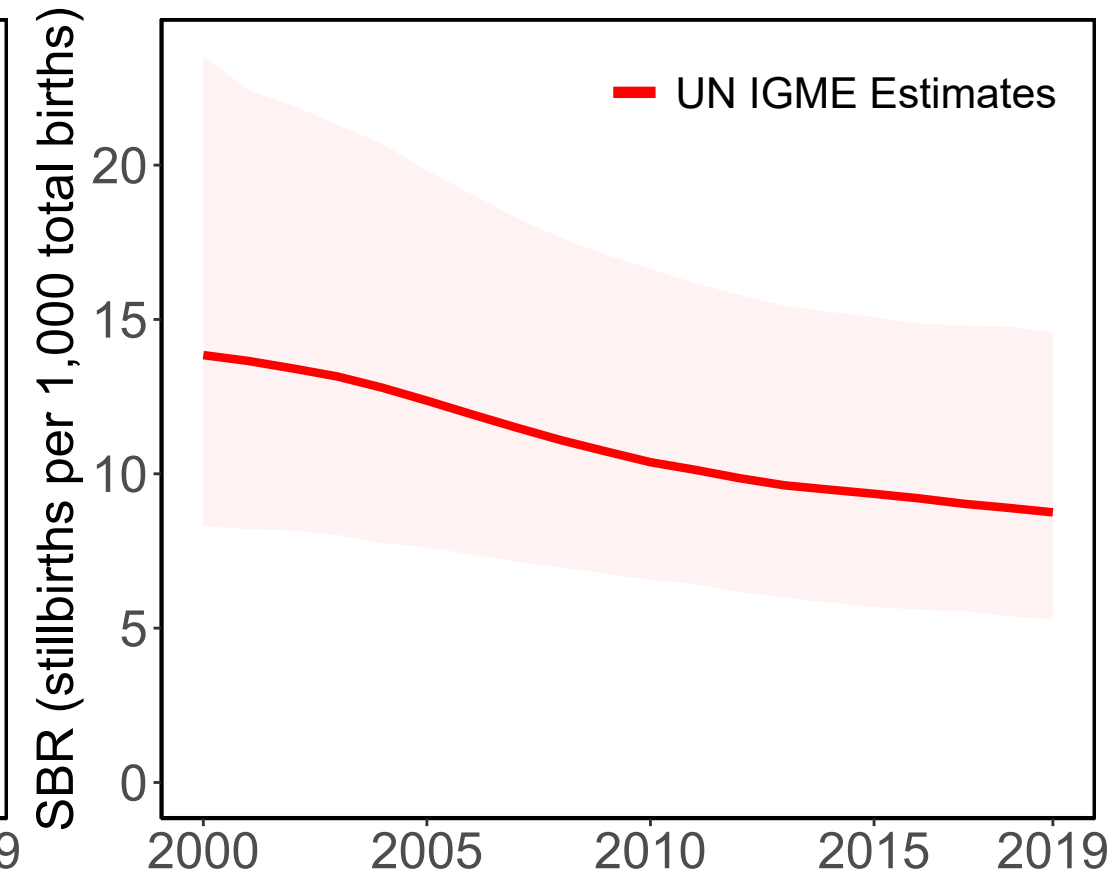

# Saint Lucia

### Available Data

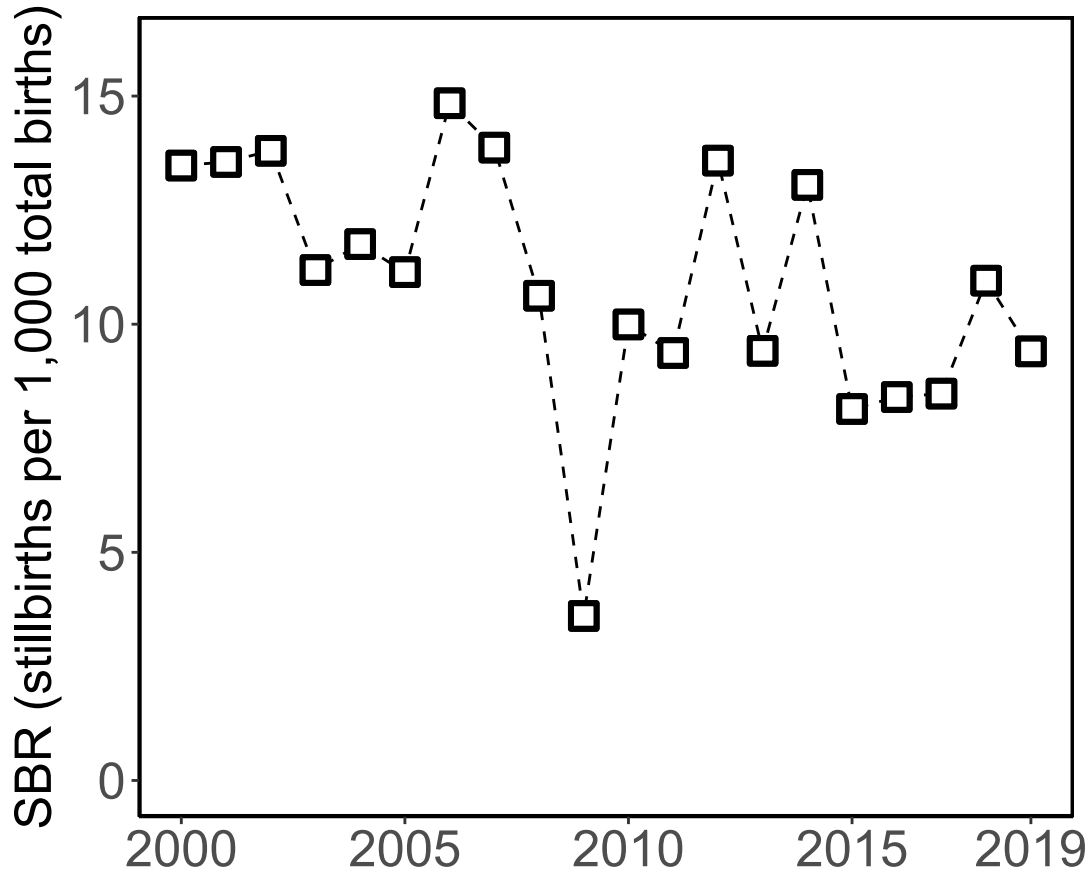

### '28+ Weeks of Gestation' Data (Incl. Adjusted Data)

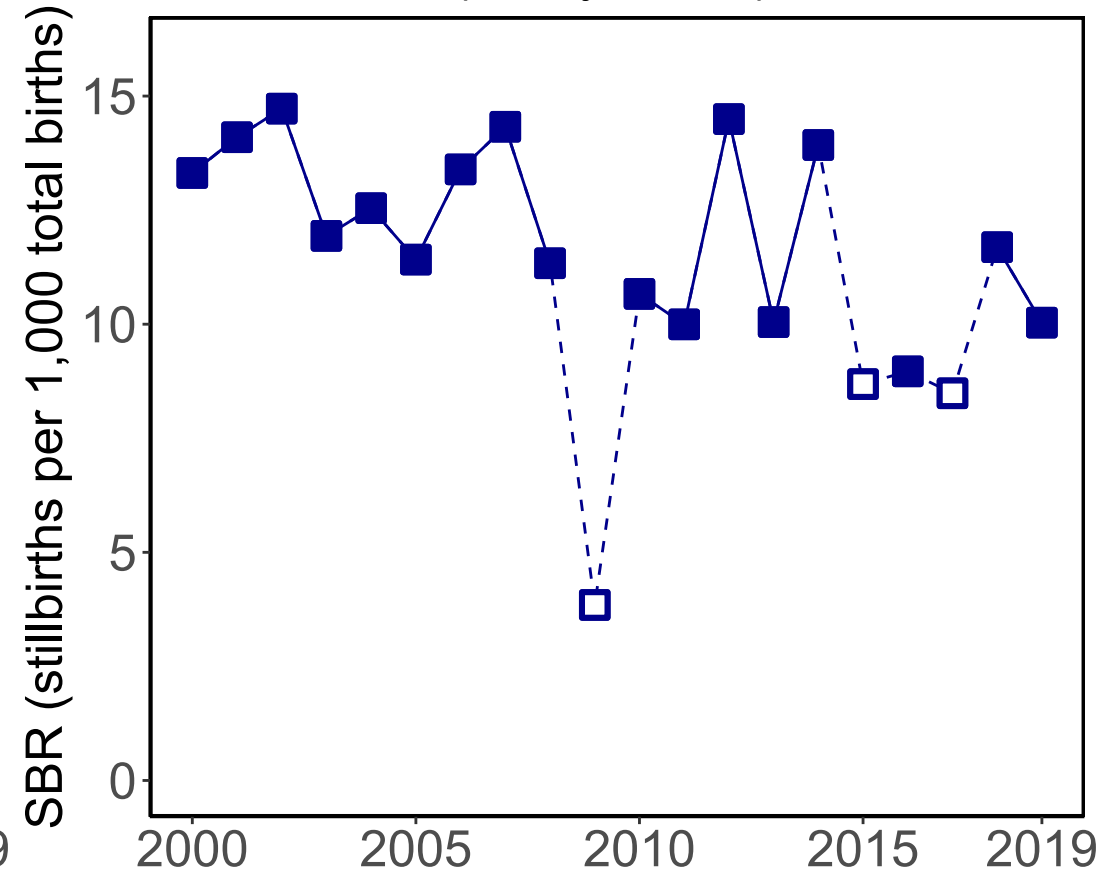

### Data Included in the Model

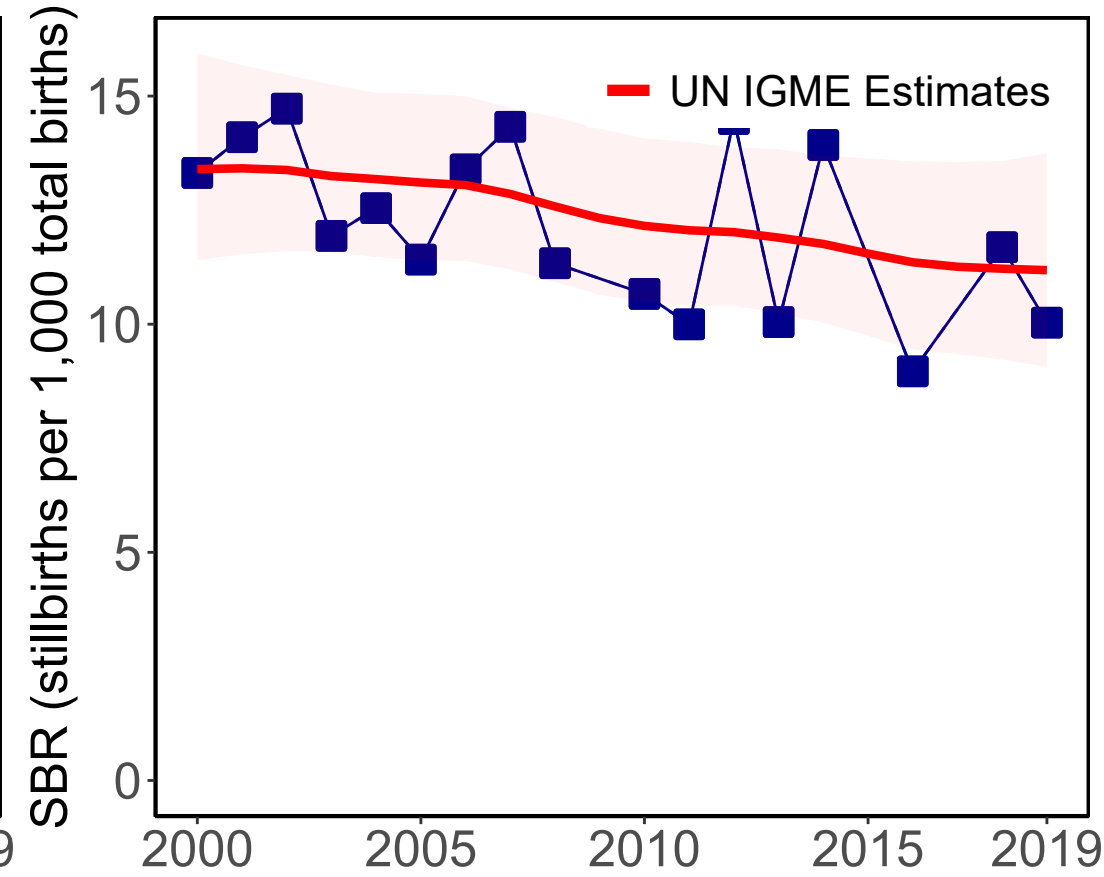

#### Source Types

Administrative

#### Data Sources

Vital Registration (1000g)

Vital Registration (28wks adj from 1000g)



# Sri Lanka

### Available Data

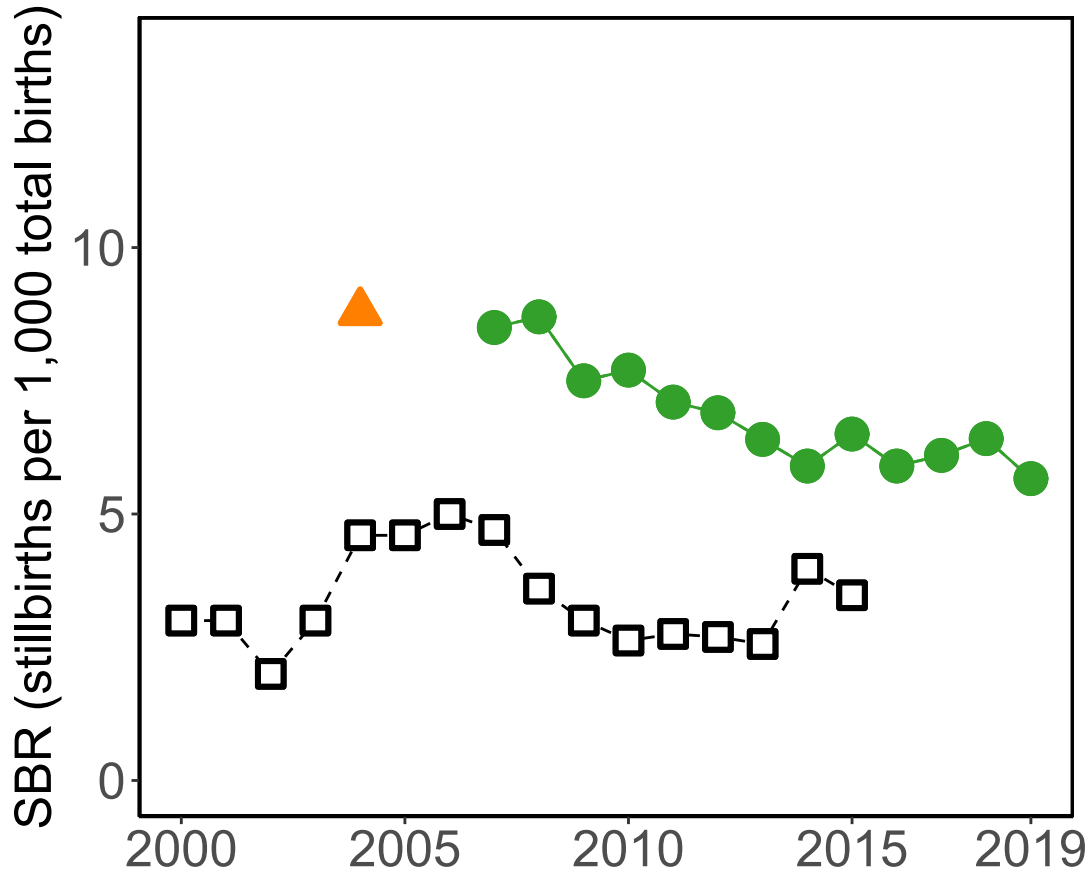

### '28+ Weeks of Gestation' Data (Incl. Adjusted Data)

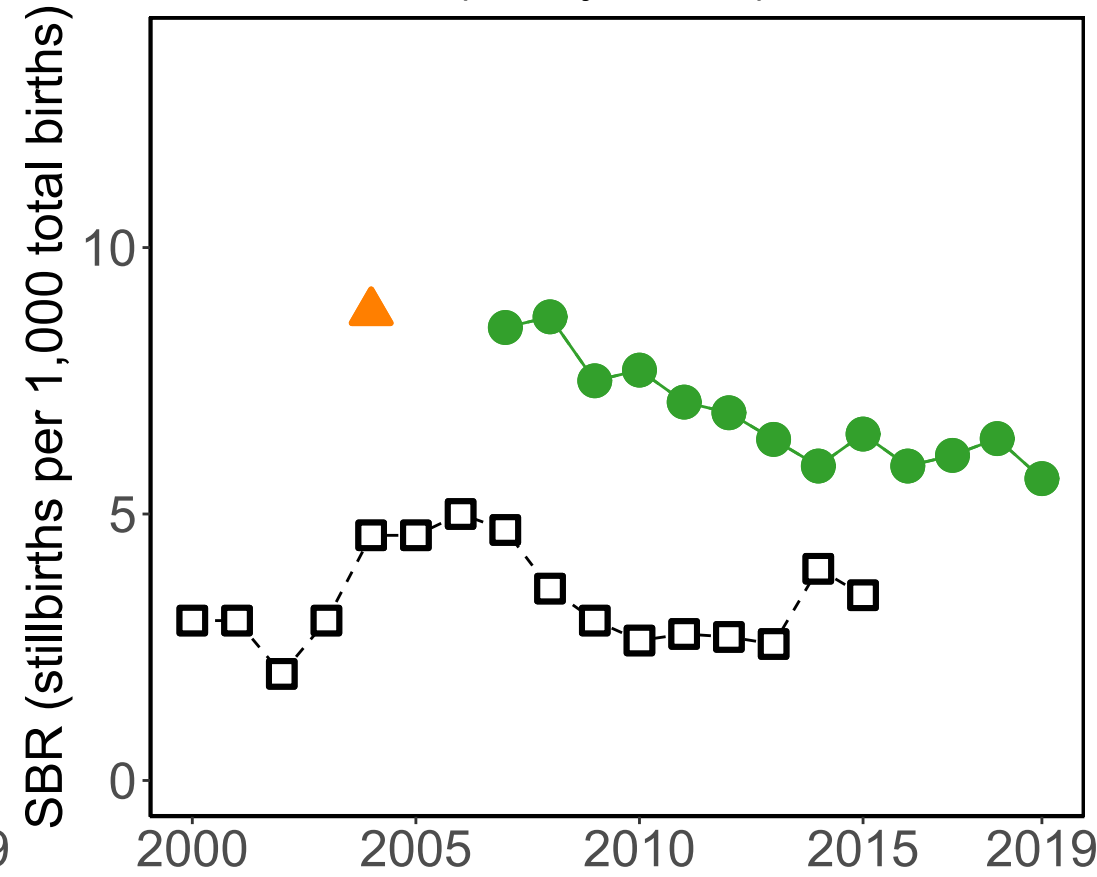

### Data Included in the Model

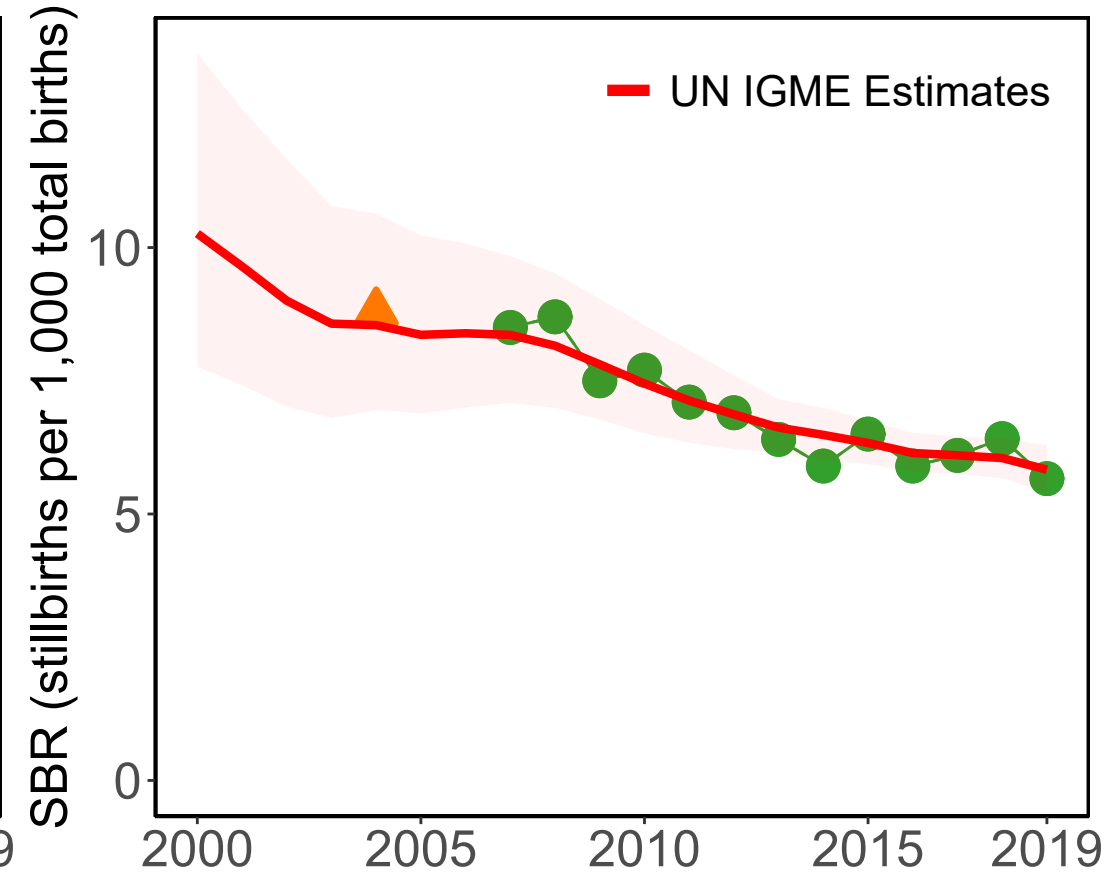

#### Source Types

- Administrative
- HMIS
- Survey

#### Data Sources

- Vital Registration (28wks)
- HMIS-DHIS2 (28wks)
- Demographic and Health Survey 2006-07 (DHS) (RC) (28wks)

# Lesotho

### Available Data

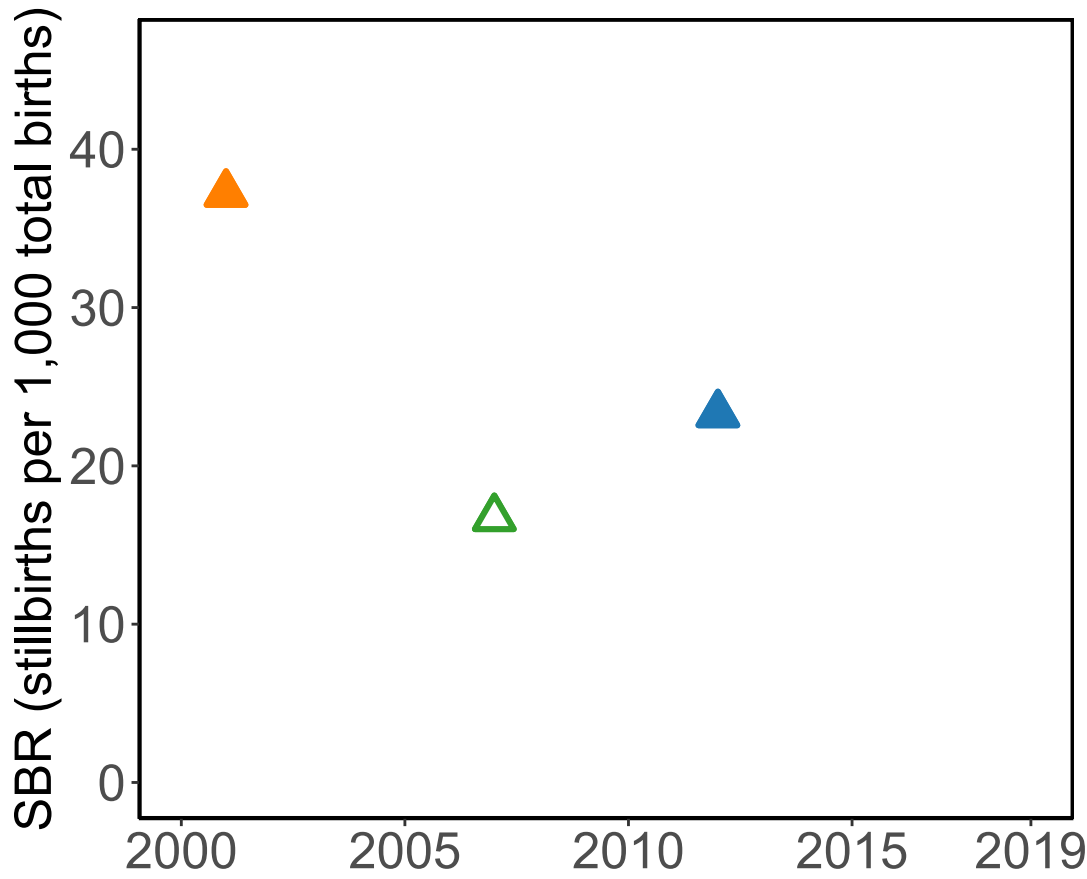

### '28+ Weeks of Gestation' Data (Incl. Adjusted Data)

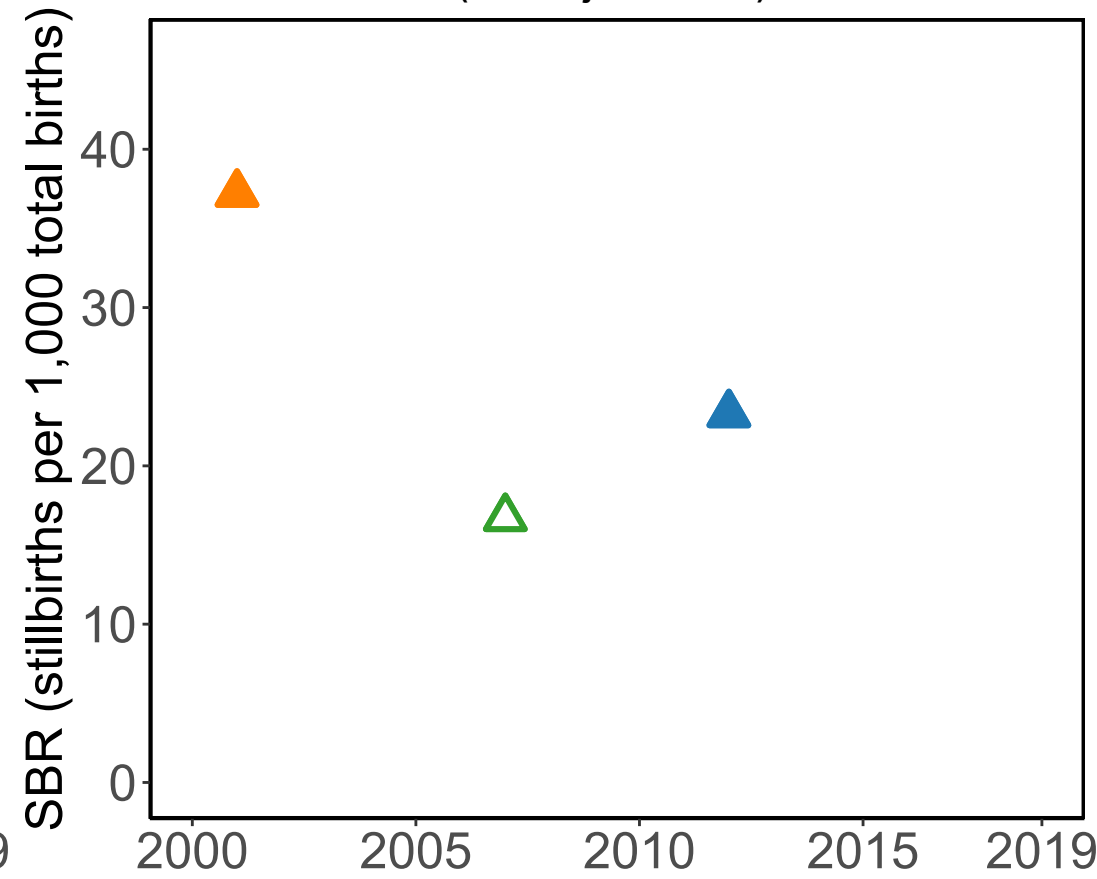

### Data Included in the Model

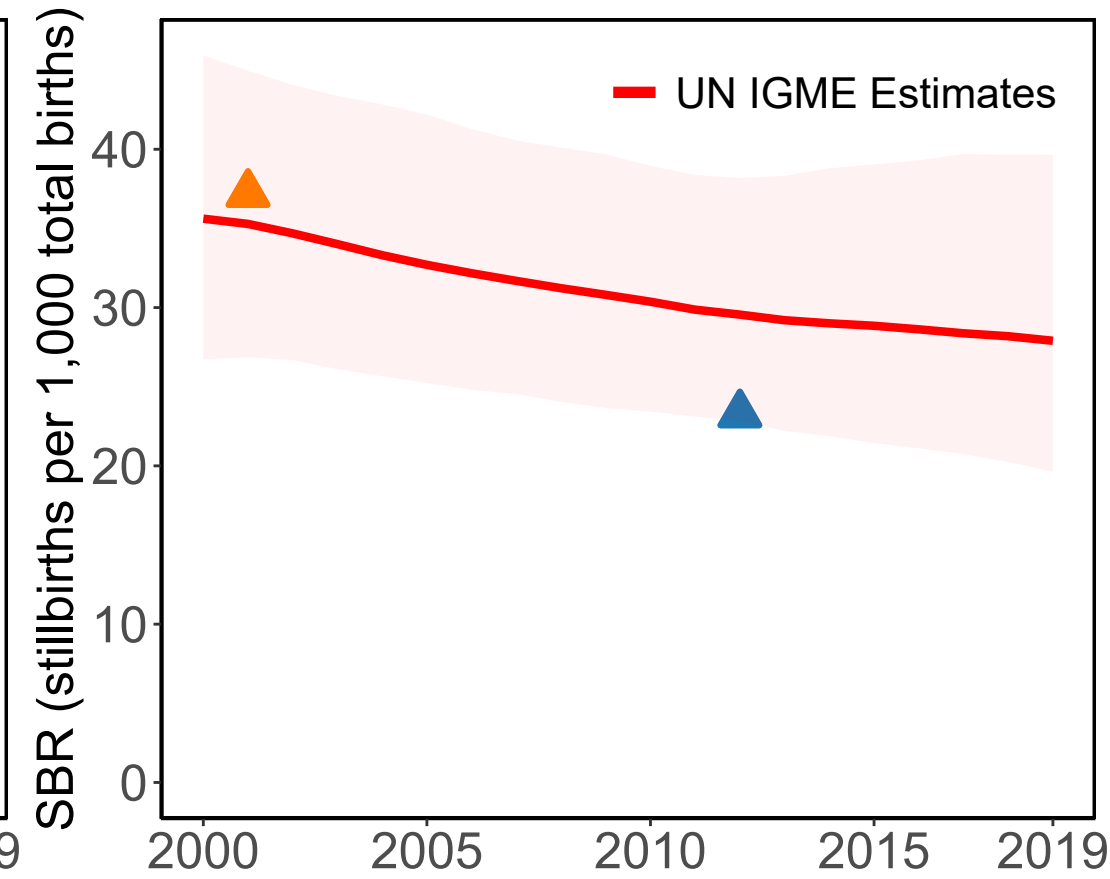

#### Source Types



#### Data Sources

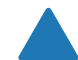

Demographic and Health Survey 2014 (DHS) (RC) (28wks)

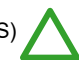

Demographic and Health Survey 2009 (DHS) (RC) (28wks)

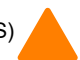

Demographic and Health Survey 2004 (DHS) (BH/SQ) (28wks)

# Lithuania

### Available Data

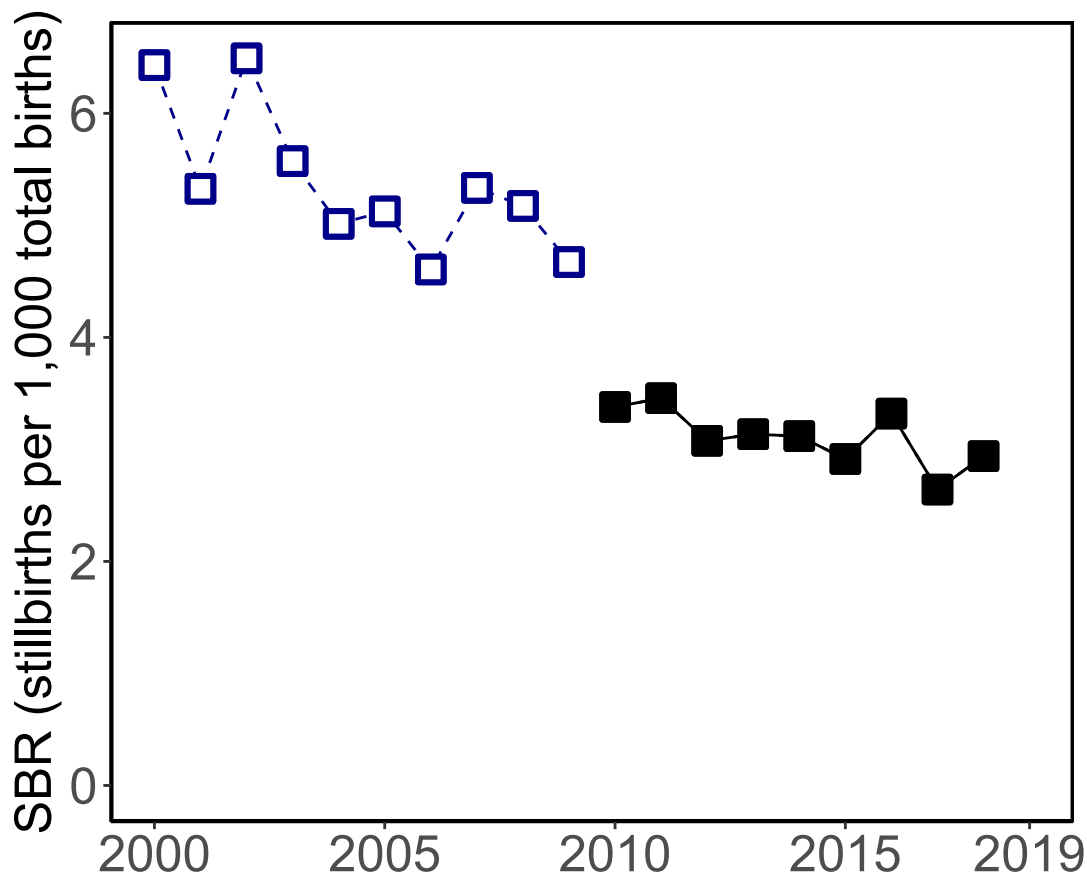

### '28+ Weeks of Gestation' Data (Incl. Adjusted Data)

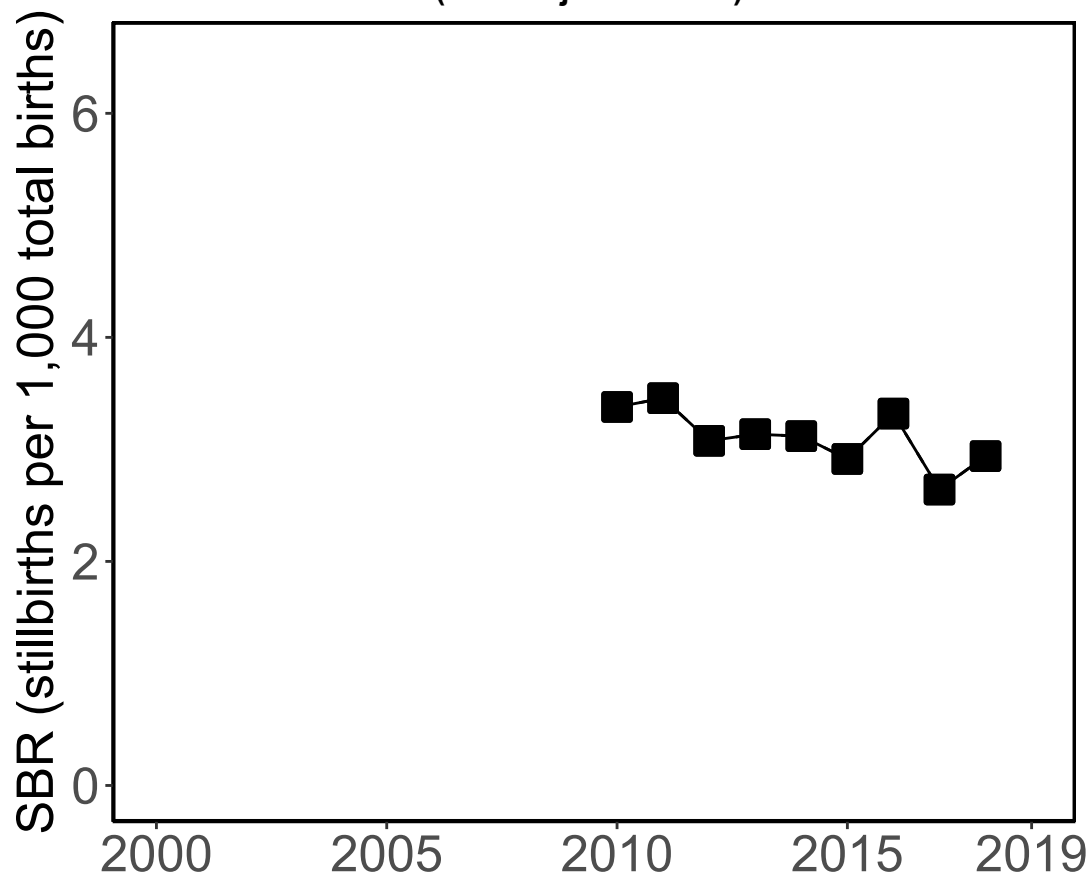

### Data Included in the Model

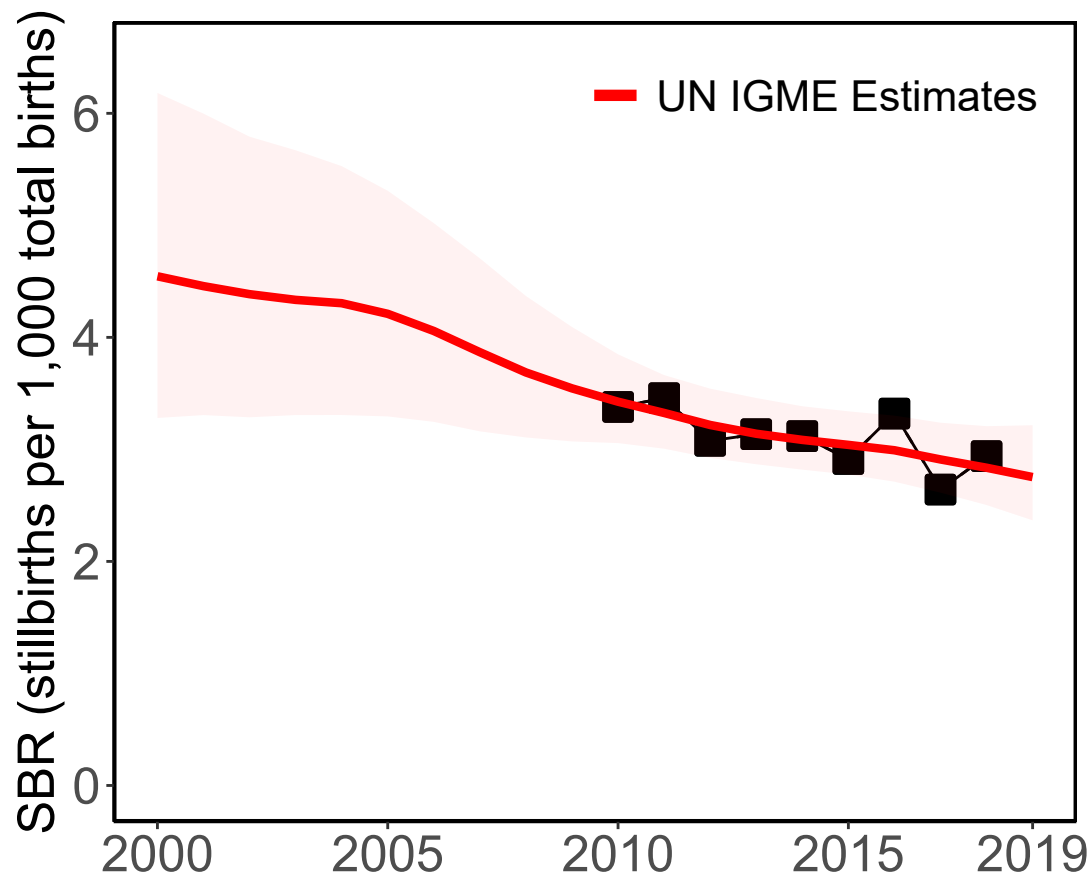

#### Source Types

Administrative

#### Data Sources

Vital Registration (28wks)

Vital Registration (any gestational age or birthweight)

# Luxembourg

### Available Data

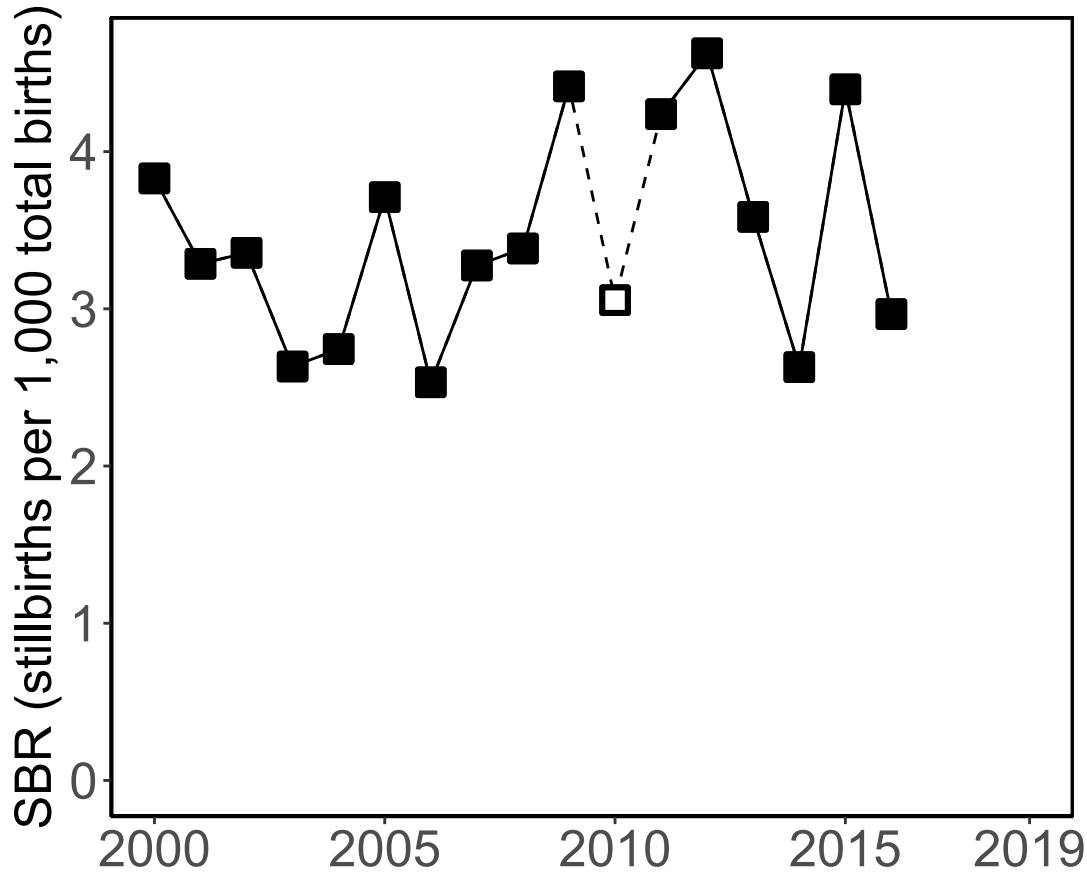

### '28+ Weeks of Gestation' Data (Incl. Adjusted Data)

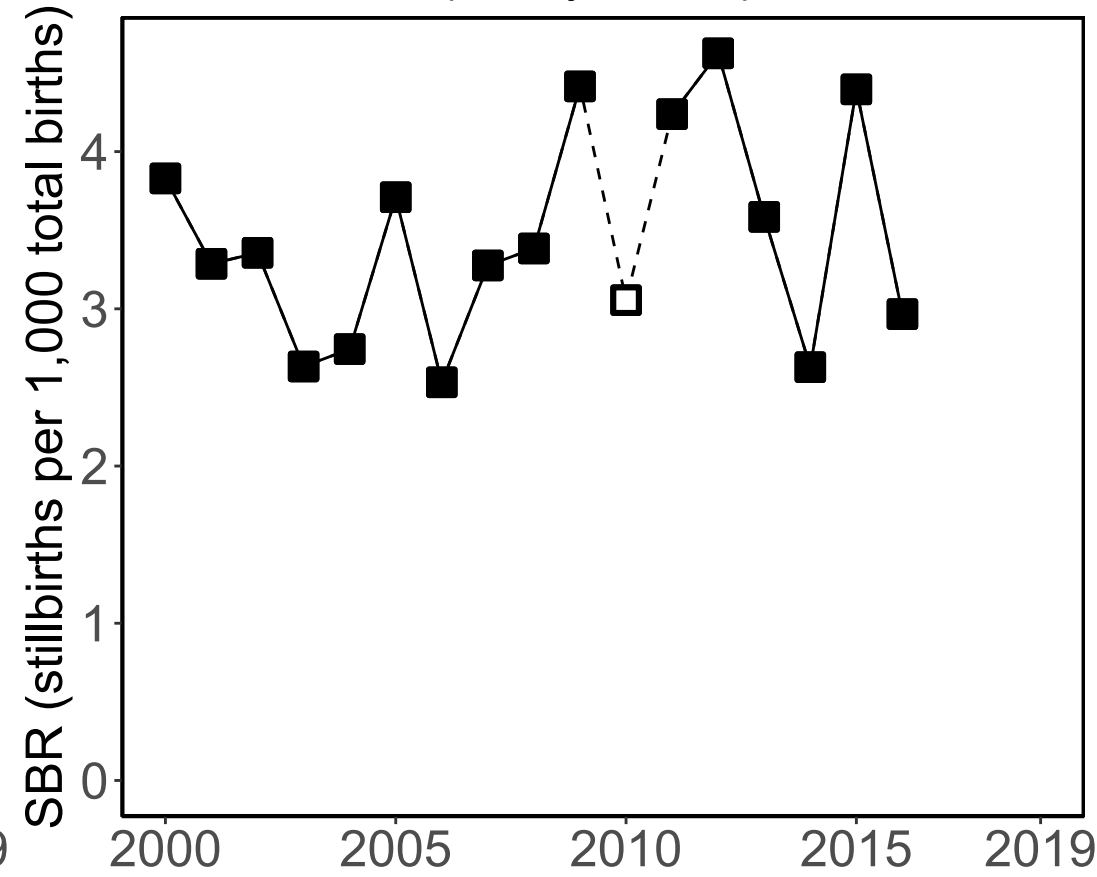

### Data Included in the Model

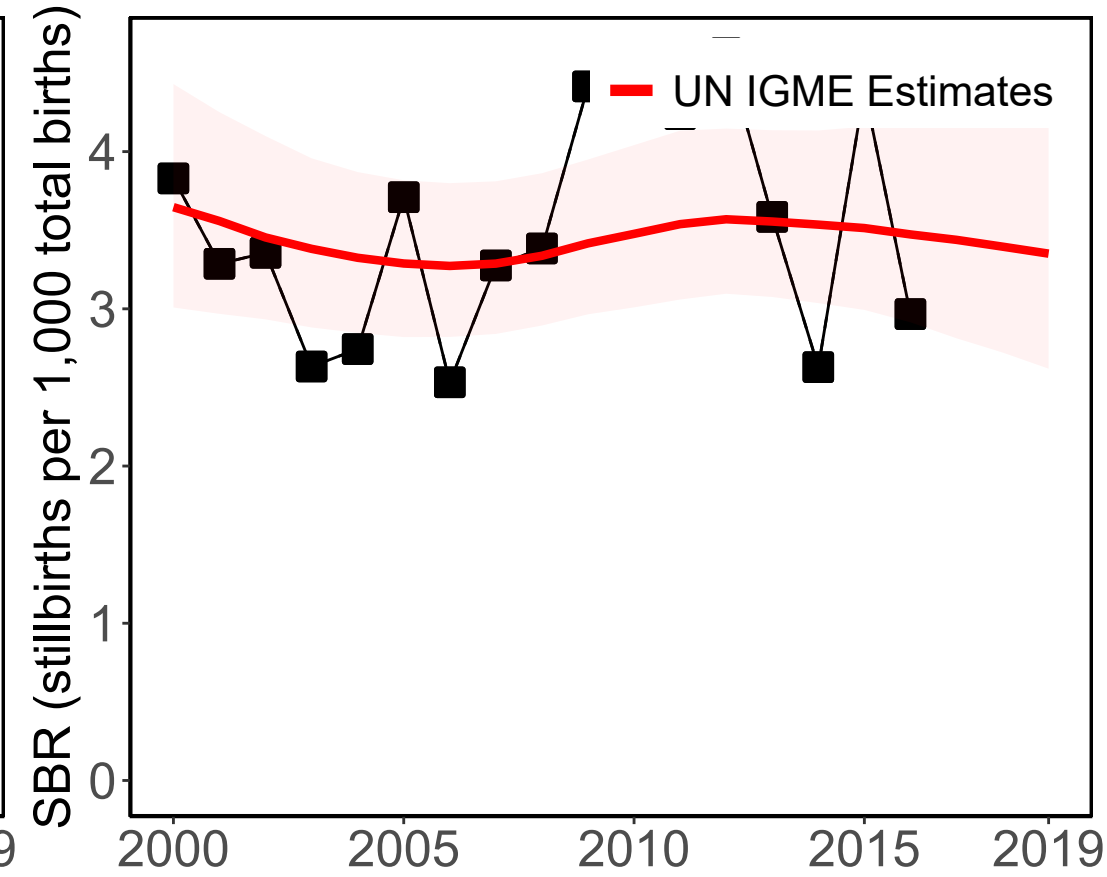

#### Source Types

□ Administrative

#### Data Sources

■ Birth or Death Registry (28wks)

# Latvia

### Available Data

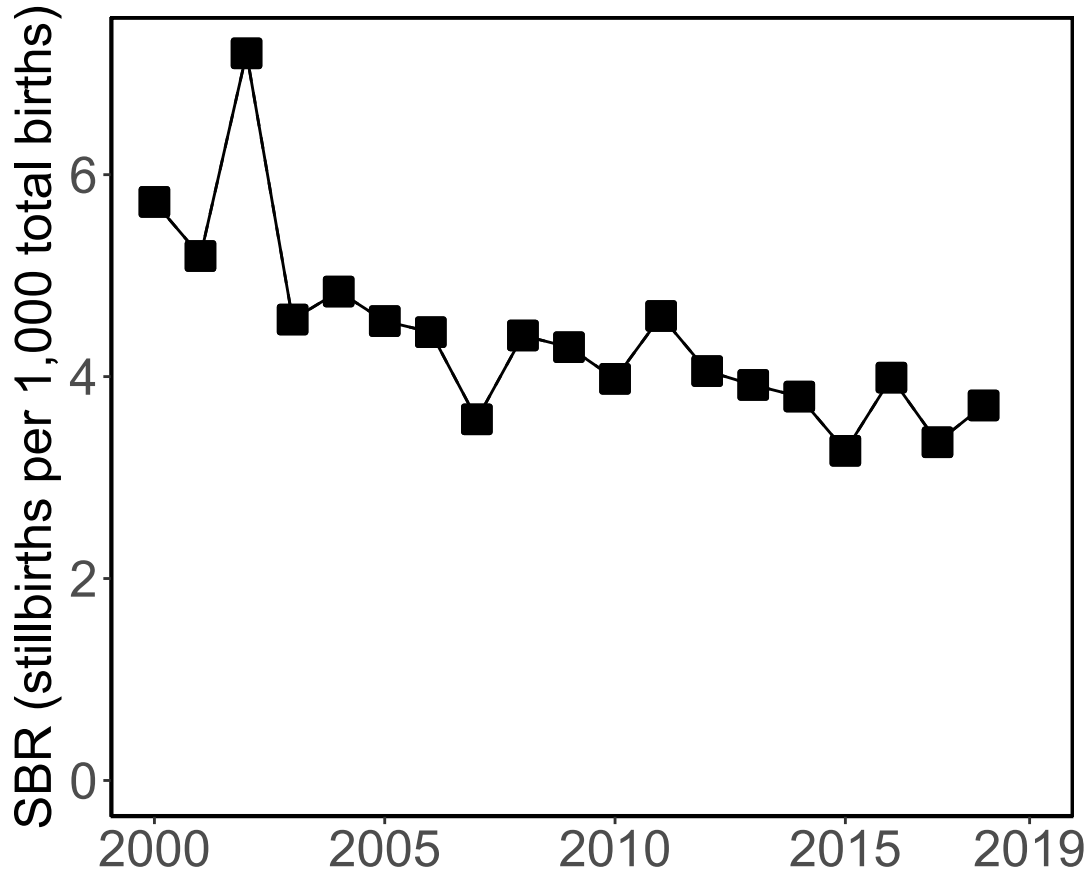

### '28+ Weeks of Gestation' Data (Incl. Adjusted Data)

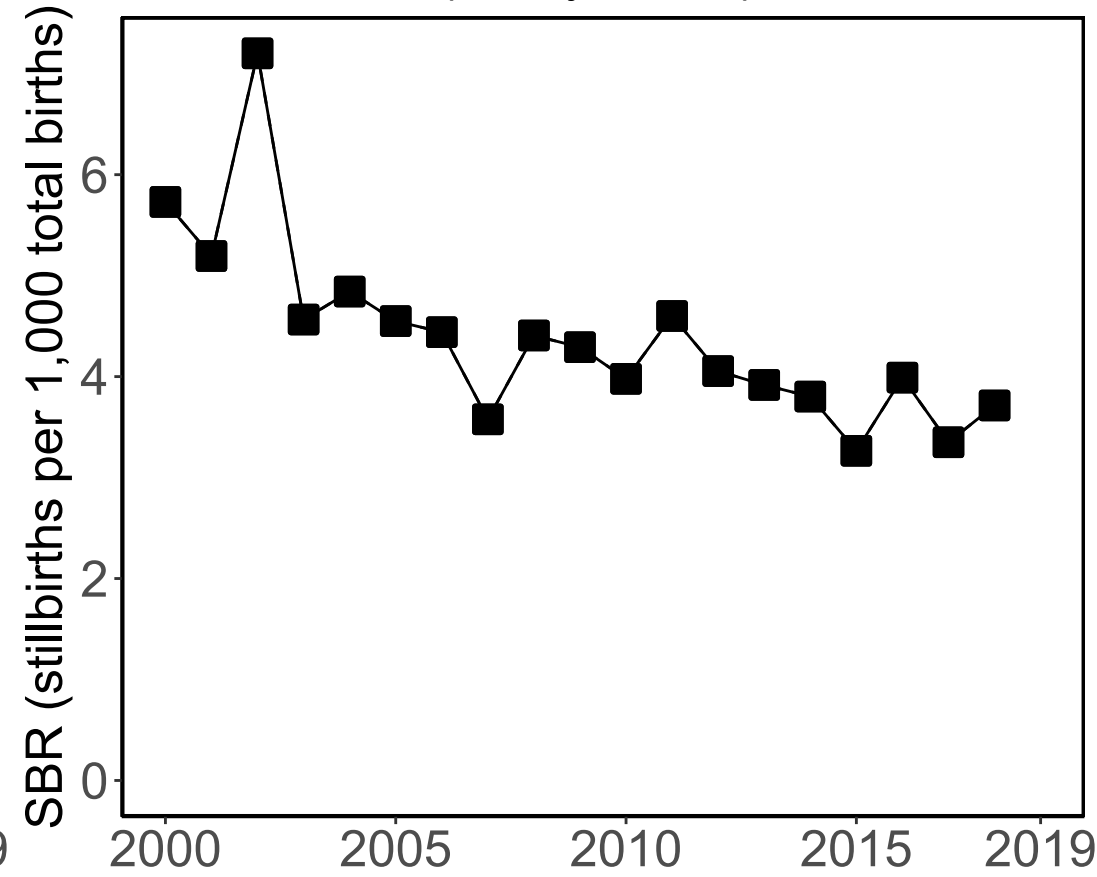

### Data Included in the Model

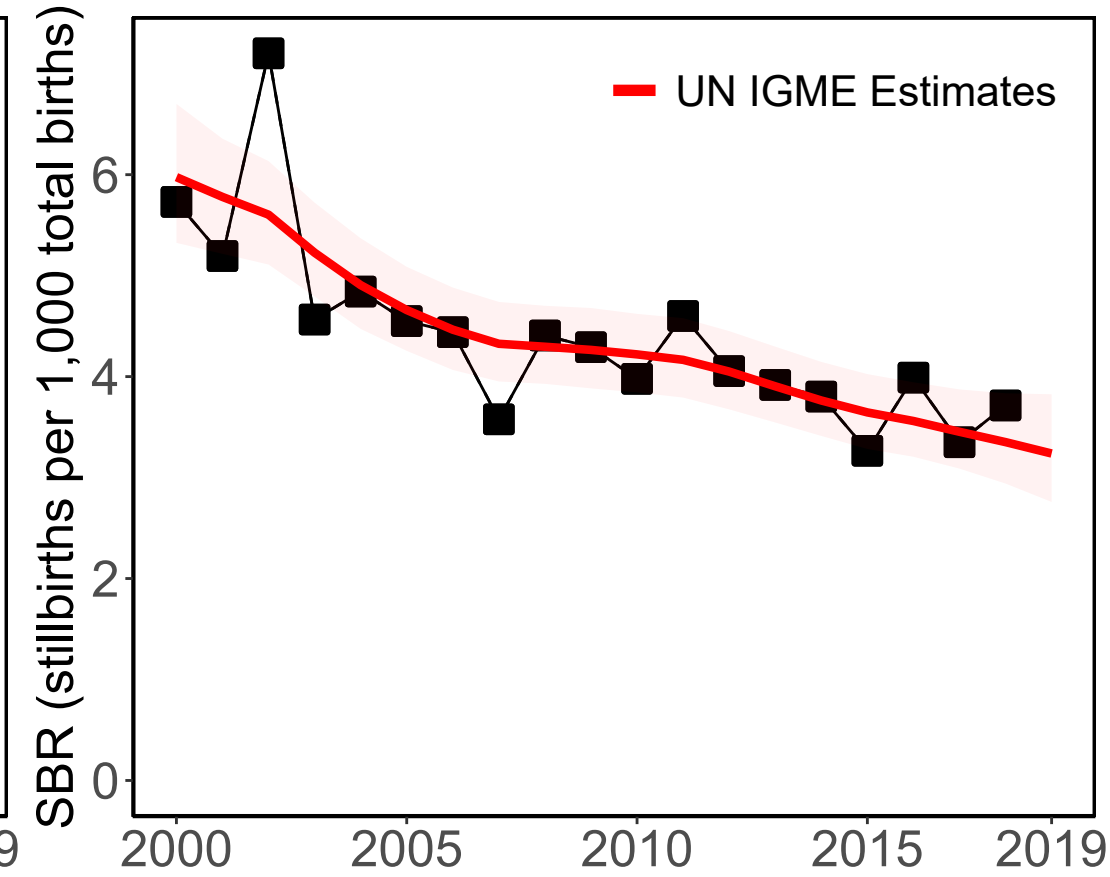

#### Source Types

Administrative

#### Data Sources

Birth or Death Registry (28wks)

# Morocco

### Available Data

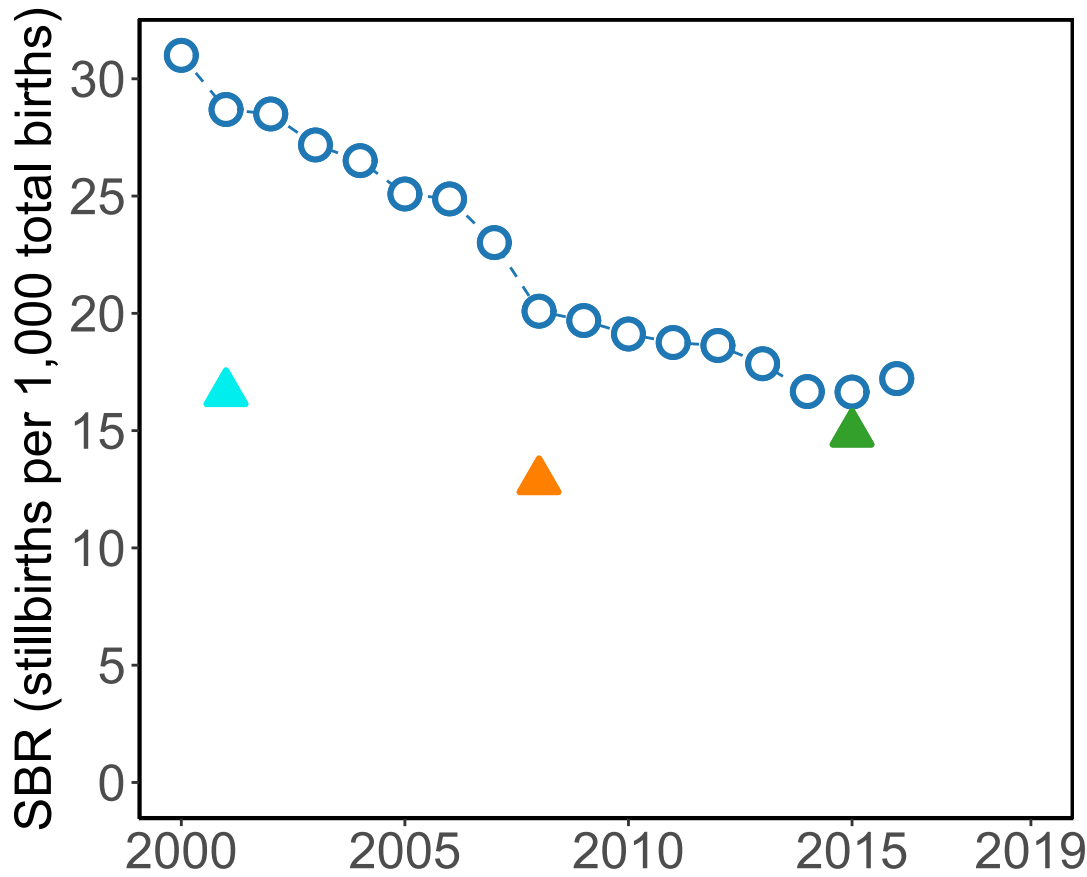

### '28+ Weeks of Gestation' Data (Incl. Adjusted Data)

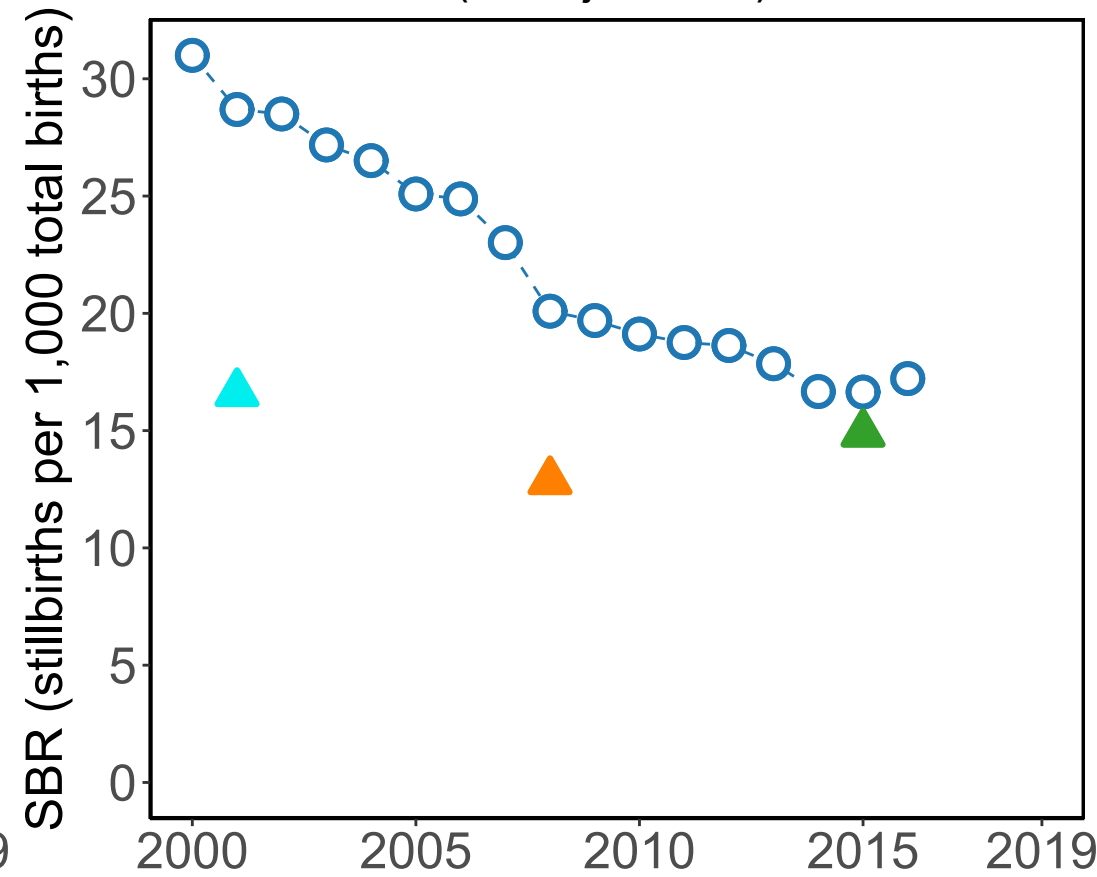

### Data Included in the Model

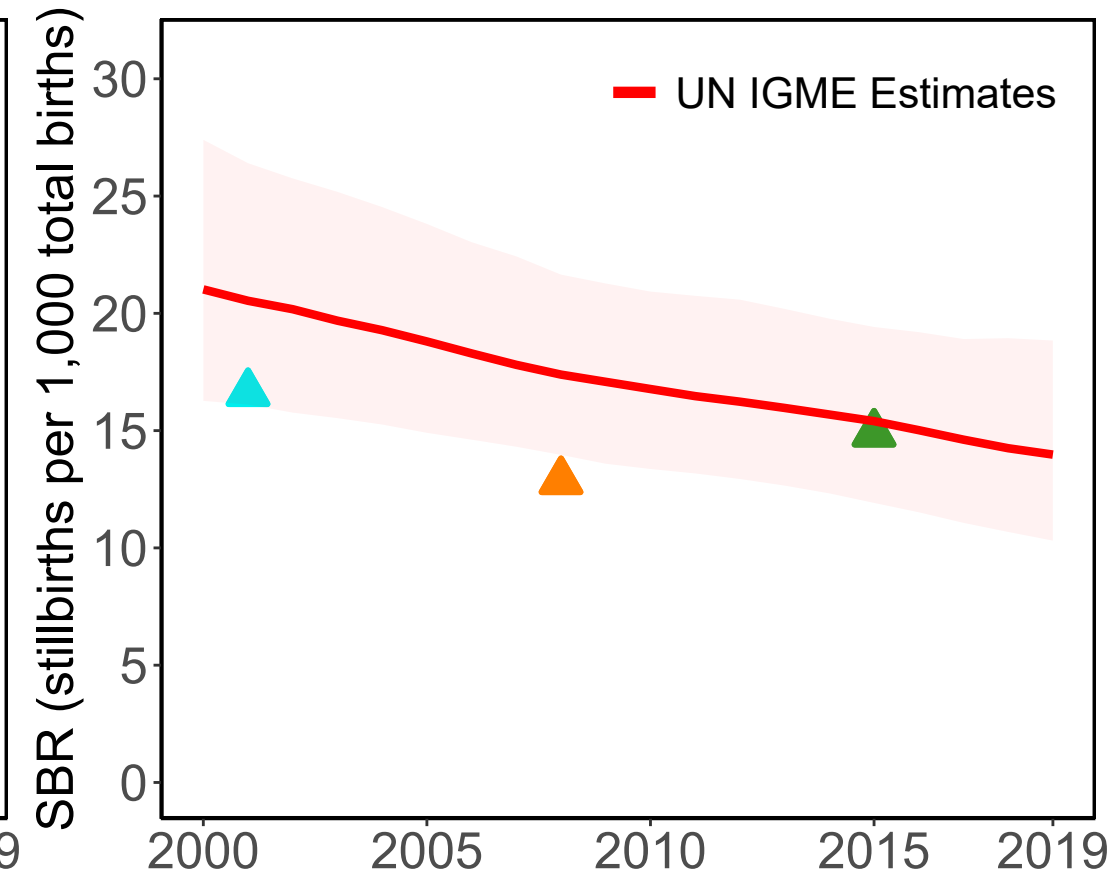

#### Source Types

○ HMIS △ Survey

#### Data Sources

○ HMIS-DHIS2 (28wks)

▲ Enquête sur la population et la santé familiale 2018 (DHS) (PH) (28wks)

▲ Enquête sur la population et la santé familiale 2011 (DHS) (PH) (28wks)

▲ Enquête sur la population et la santé familiale 2003-04 (DHS) (RC) (28wks)

# Monaco

### Available Data

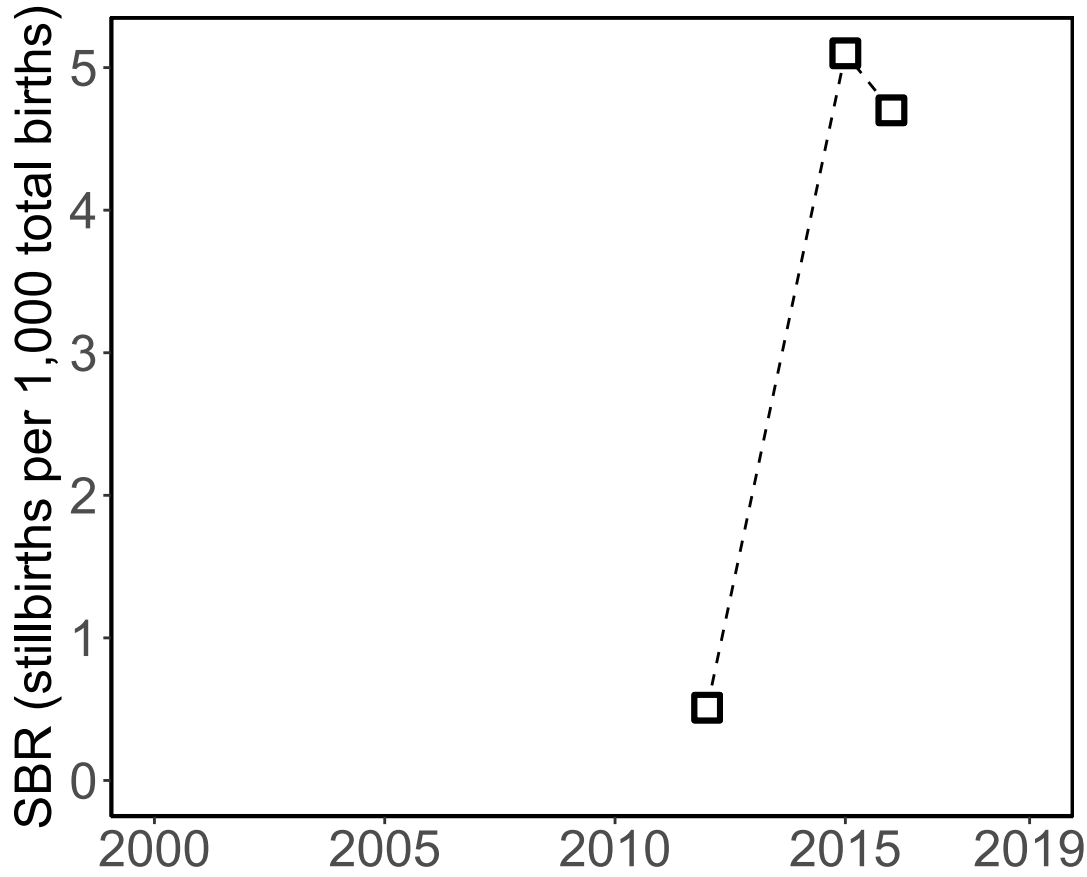

### '28+ Weeks of Gestation' Data (Incl. Adjusted Data)

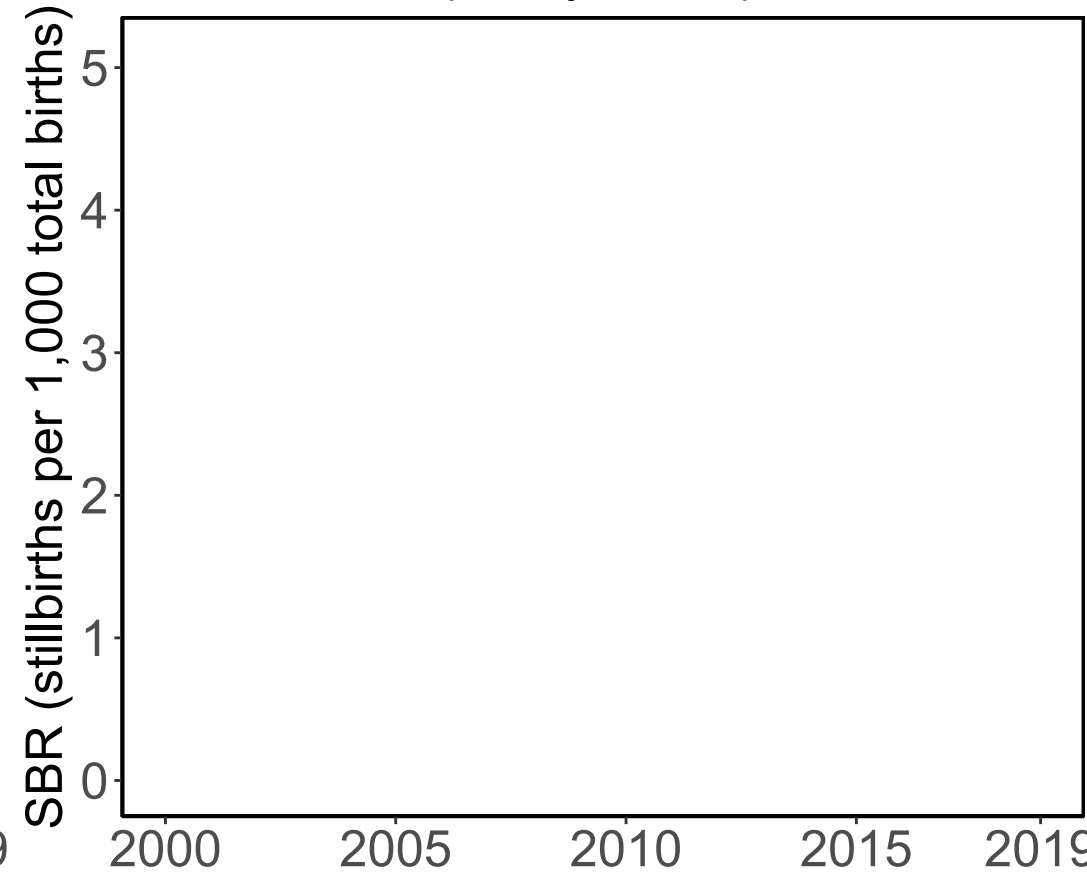

### Data Included in the Model

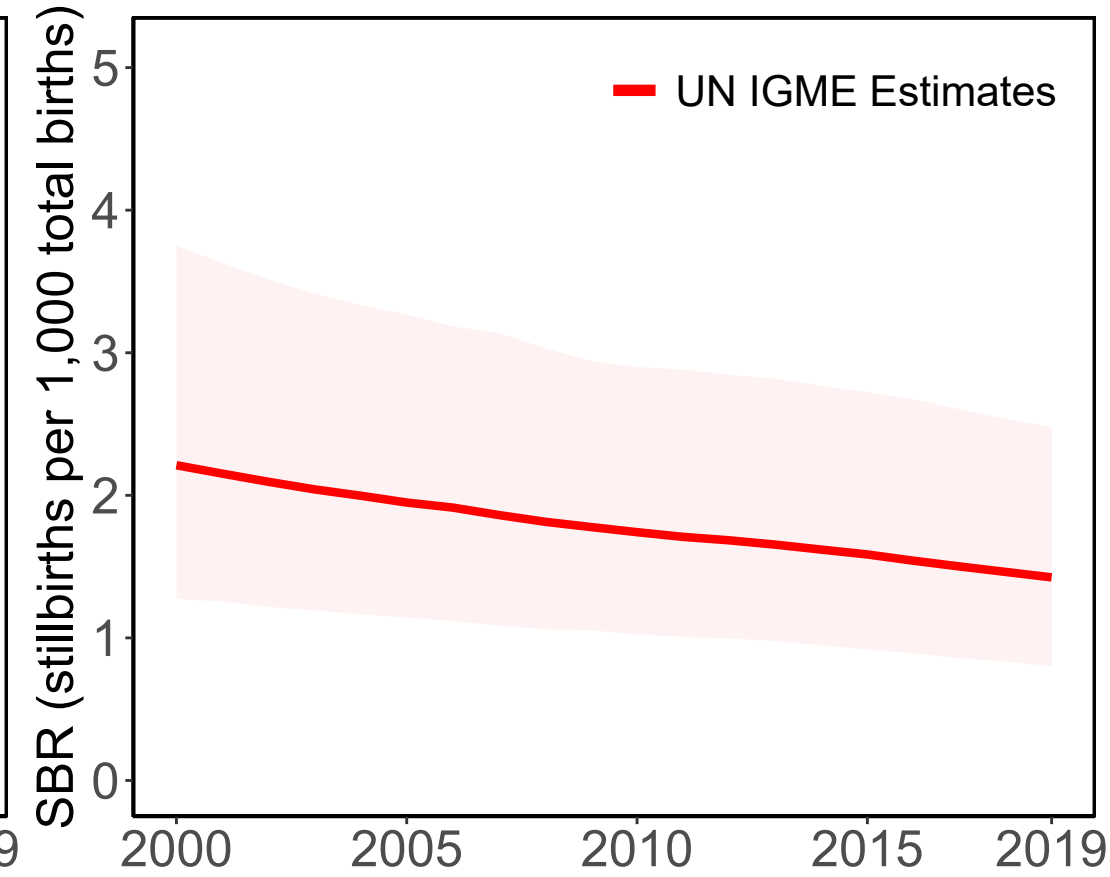

#### Source Types

□ Administrative

#### Data Sources

□ Vital Registration (not defined)

# Republic of Moldova

Available Data

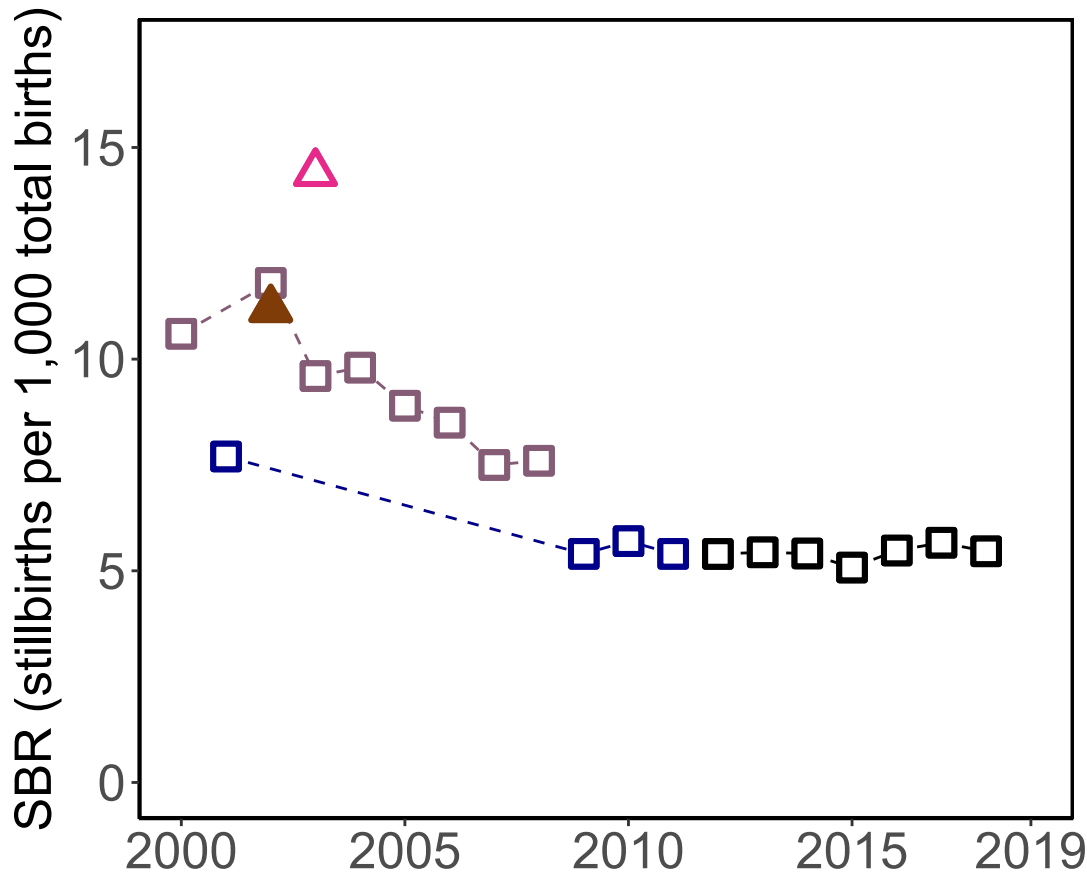

'28+ Weeks of Gestation' Data  
(Incl. Adjusted Data)

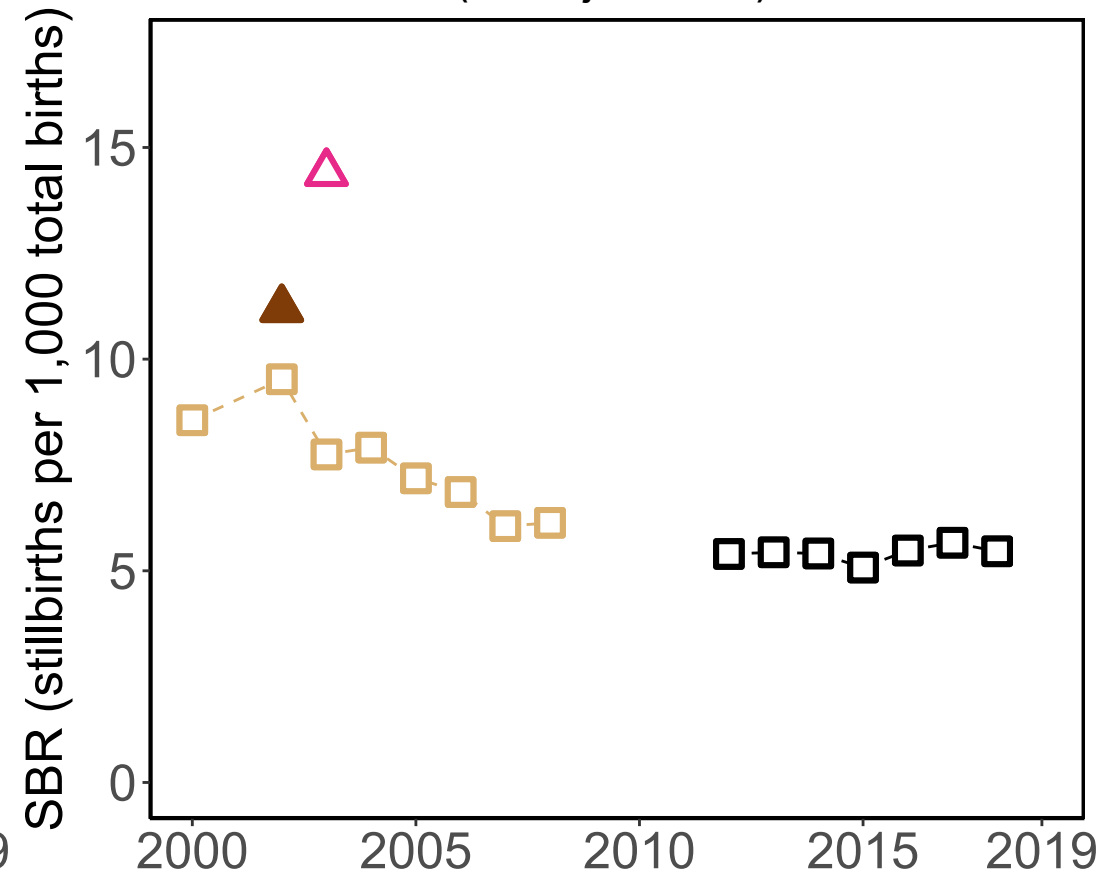

Data Included in the Model

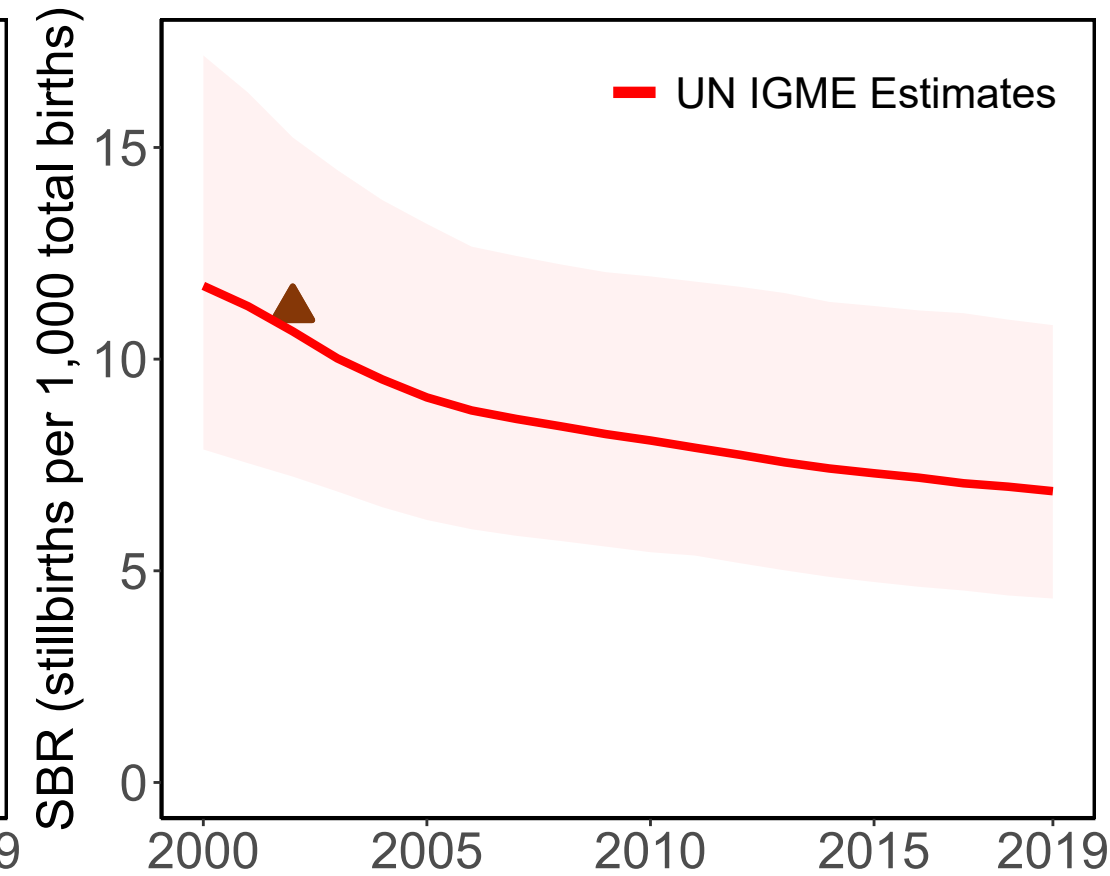

Source Types

□ Administrative    △ Survey

Data Sources

□ Birth or Death Registry (28wks)      □ Vital Registration (22wks)      △ Demographic and Health Survey 2005 (DHS) (RC) (28wks)  
 □ Vital Registration (1000g)      □ Vital Registration (28wks adj from 22wks)      △ Demographic and Health Survey 2005 (DHS) (PH) (28wks)



# Madagascar

Available Data

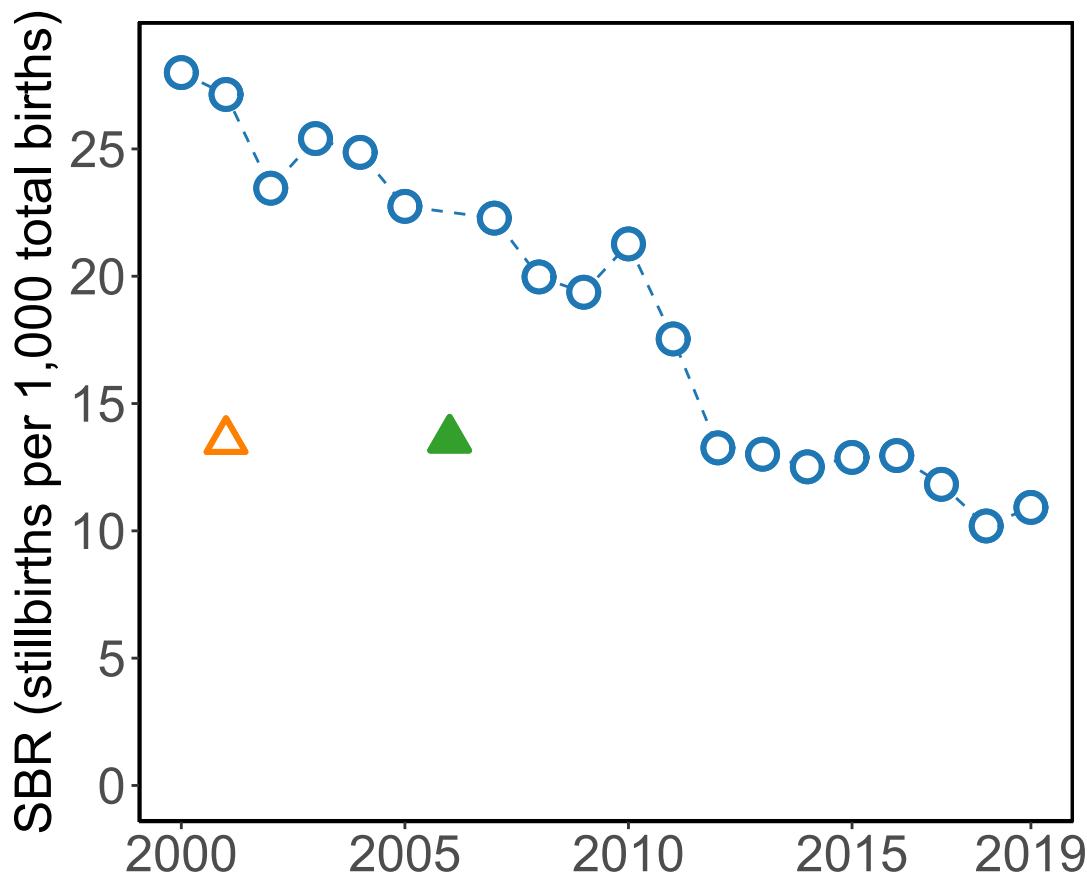

'28+ Weeks of Gestation' Data  
(Incl. Adjusted Data)

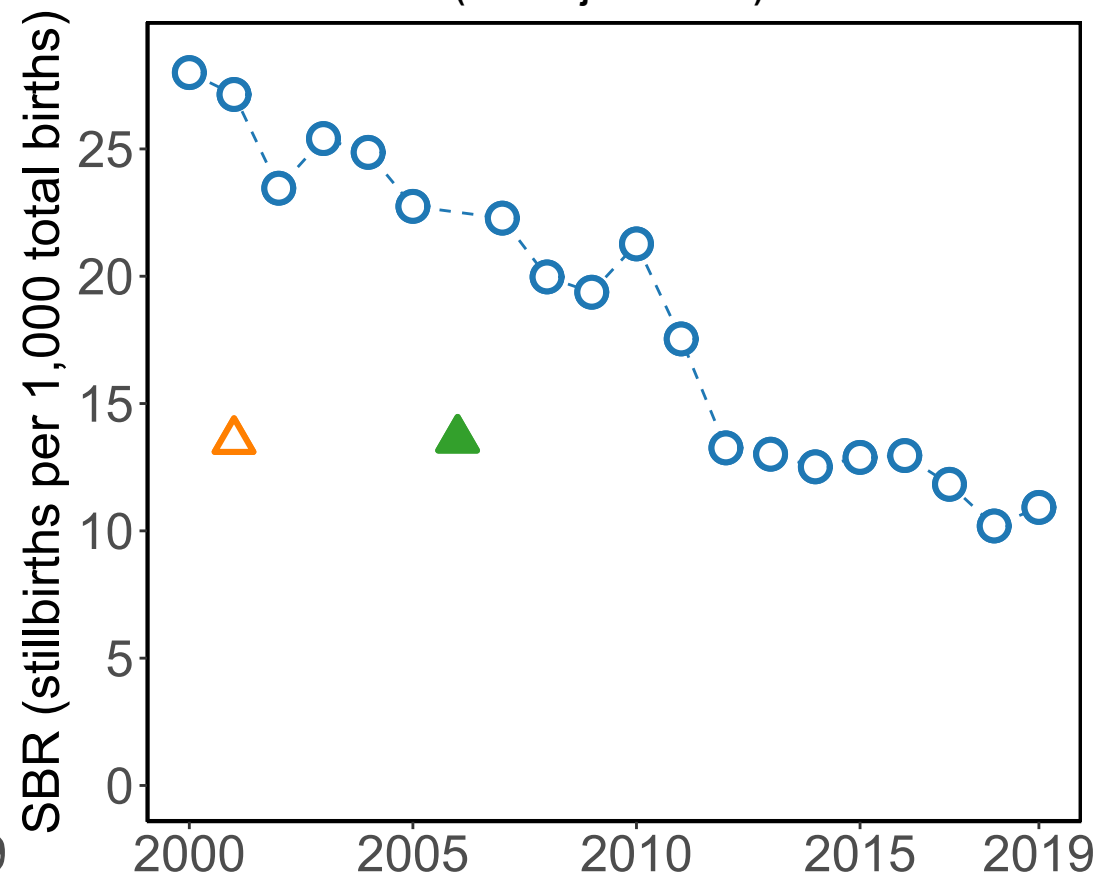

Data Included in the Model

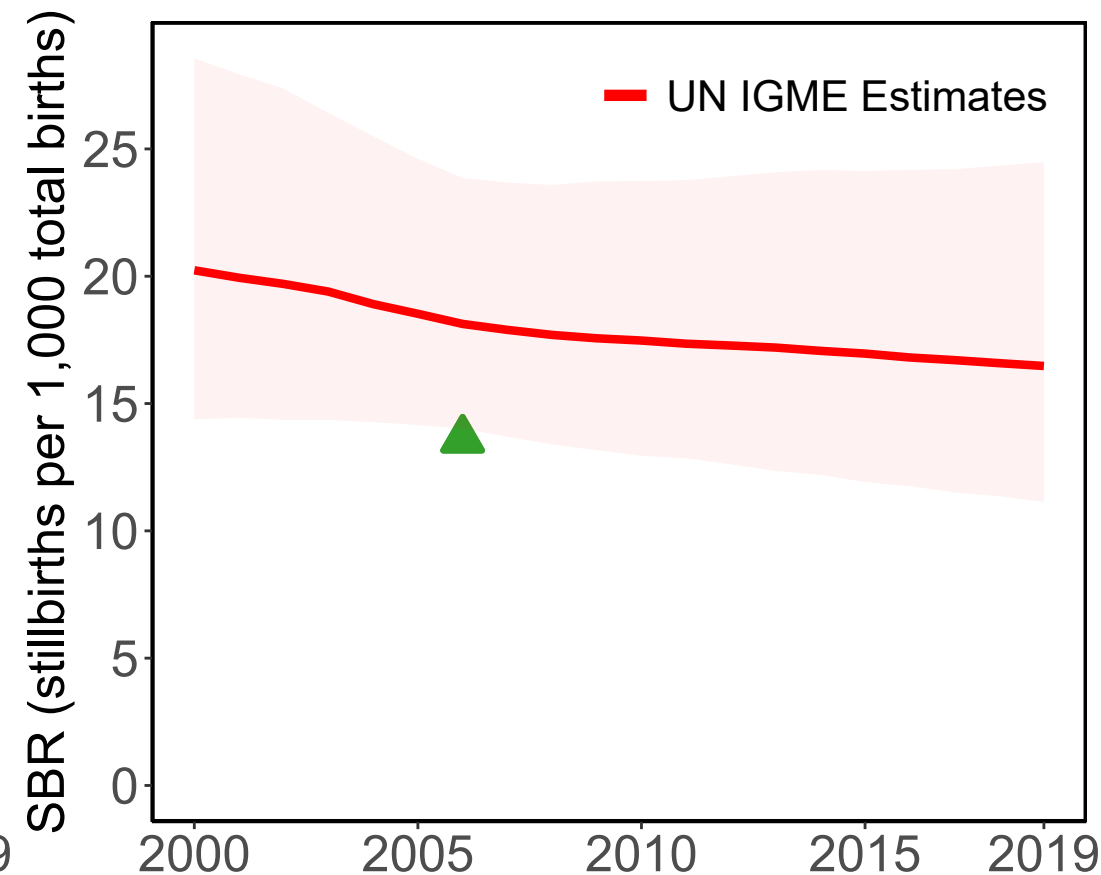

Source Types

○ HMIS △ Survey

Data Sources

○ HMIS-DHIS2 (28wks)

▲ Enquête démographique et de santé 2008-09 (DHS) (RC) (28wks)

▲ Enquête démographique et de santé 2003-04 (DHS) (RC) (28wks)

# Maldives

Available Data

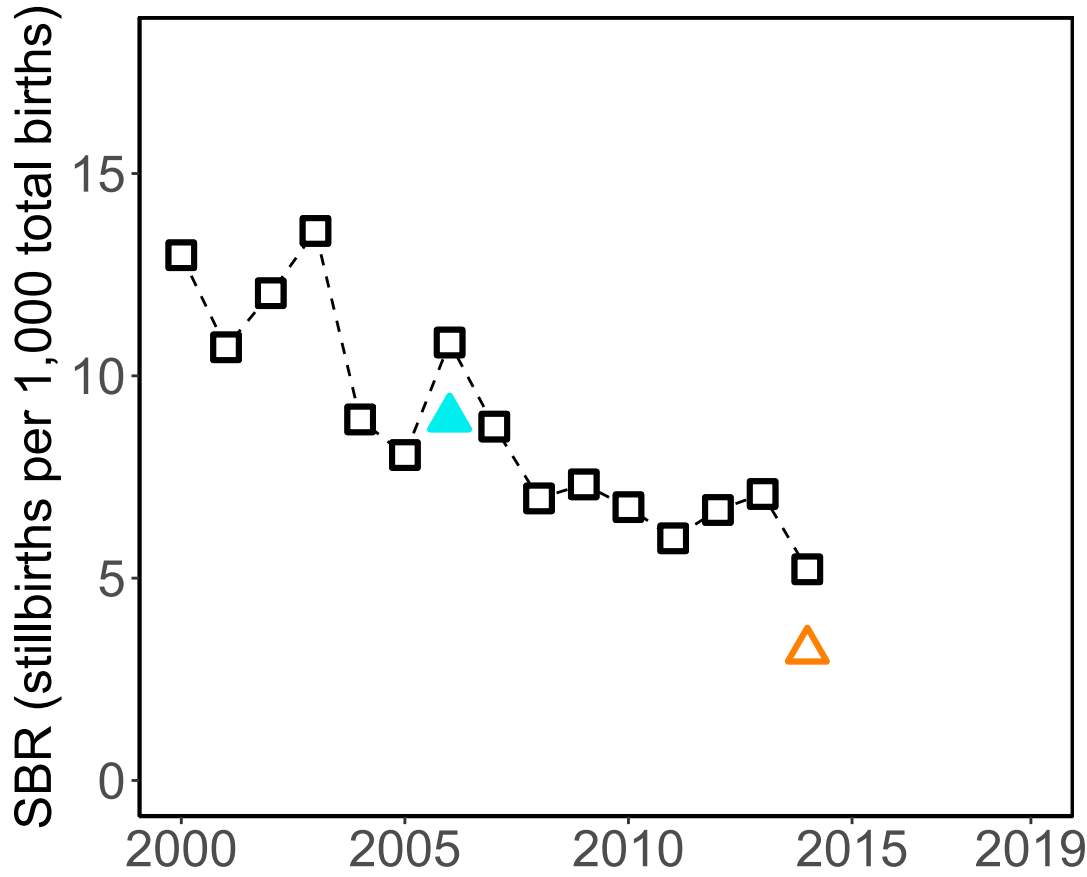

'28+ Weeks of Gestation' Data  
(Incl. Adjusted Data)

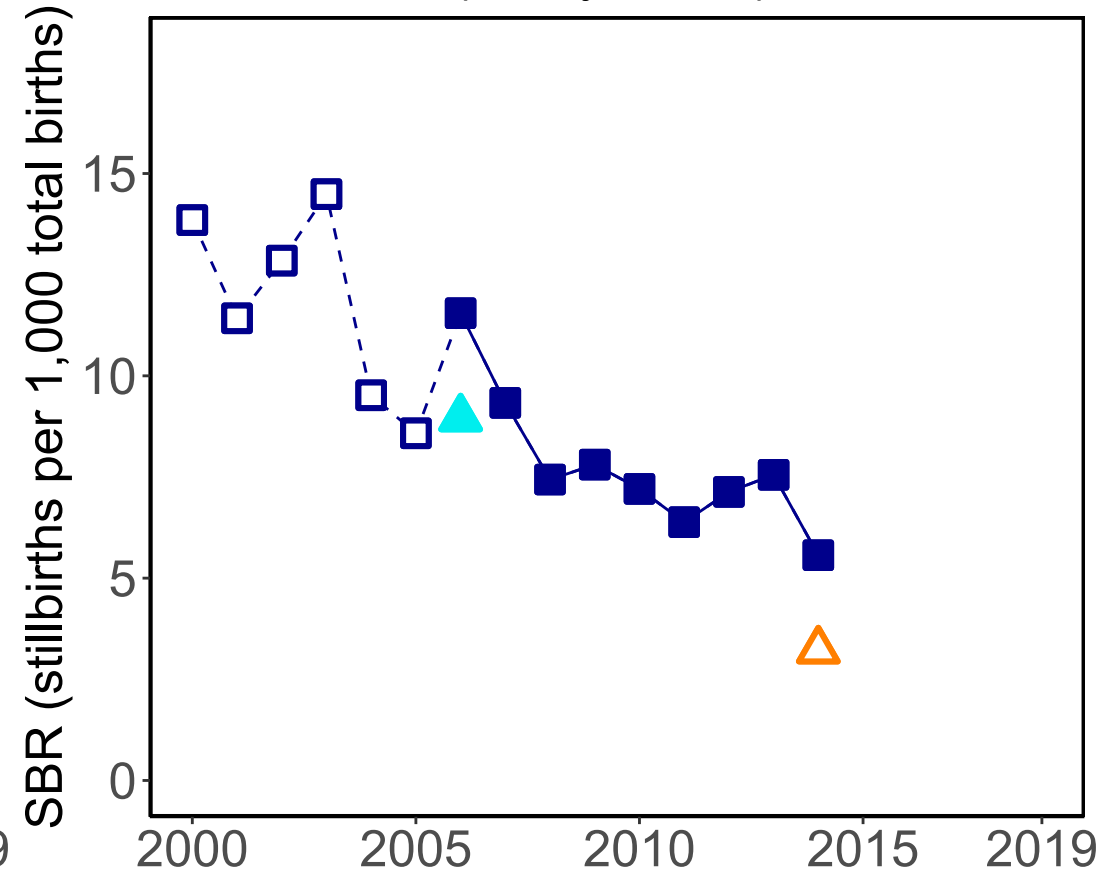

Data Included in the Model

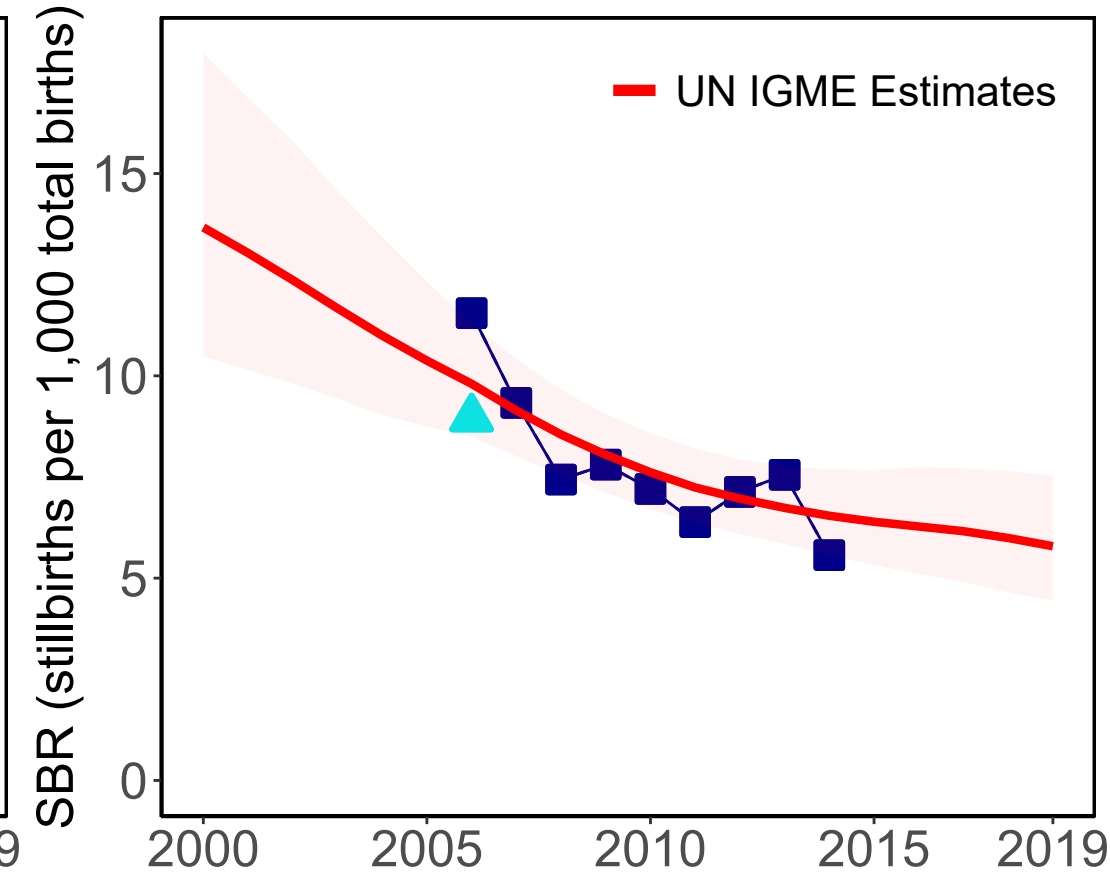

Source Types

□ Administrative    △ Survey

Data Sources

■ Vital Registration (28wks adj from 1000g)    □ Vital Registration (1000g)

△ Demographic and Health Survey 2016-17 (DHS) (RC) (28wks)    ▲ Demographic and Health Survey 2009 (DHS) (RC) (28wks)

# Mexico

### Available Data

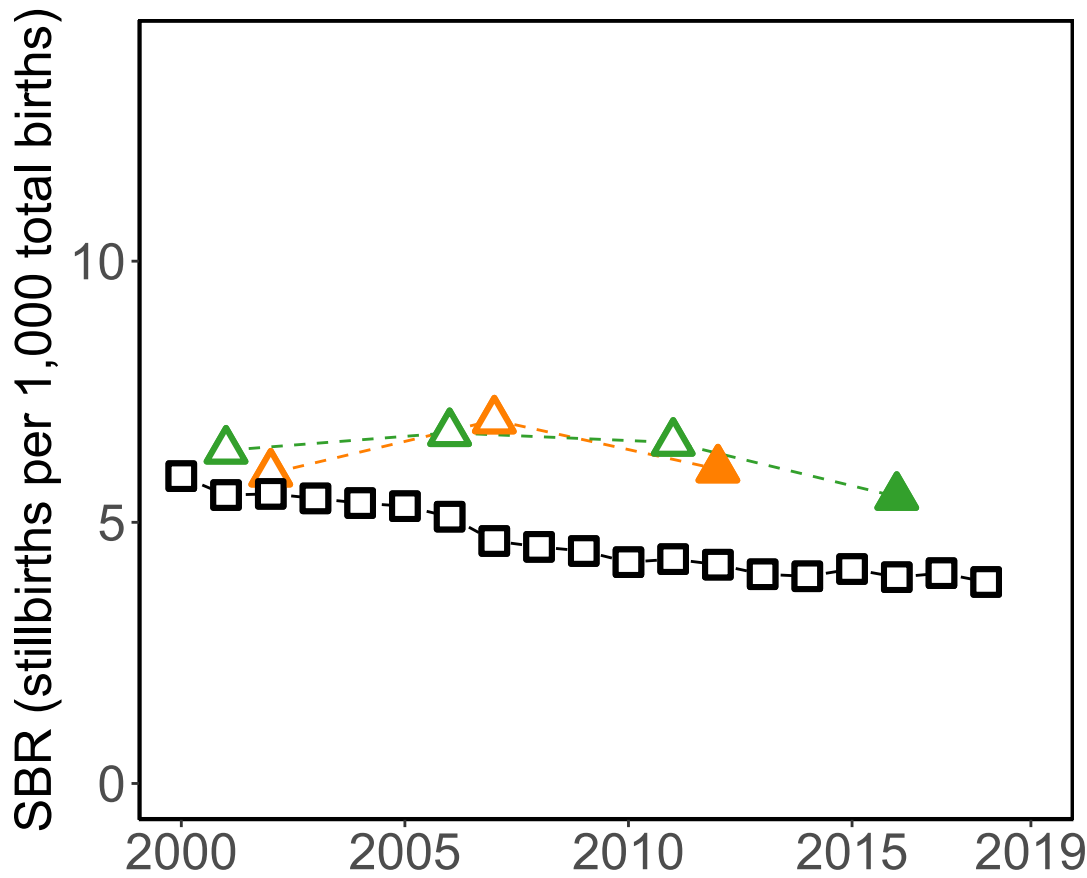

### '28+ Weeks of Gestation' Data (Incl. Adjusted Data)

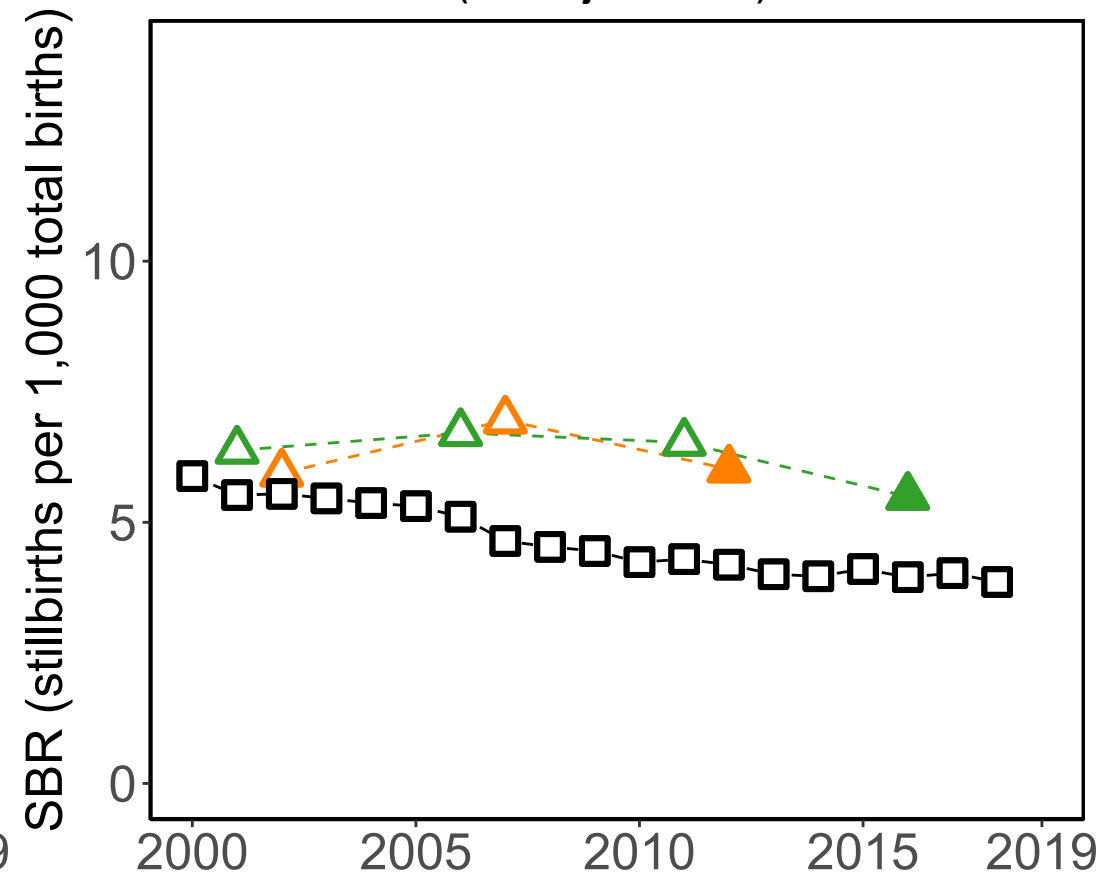

### Data Included in the Model

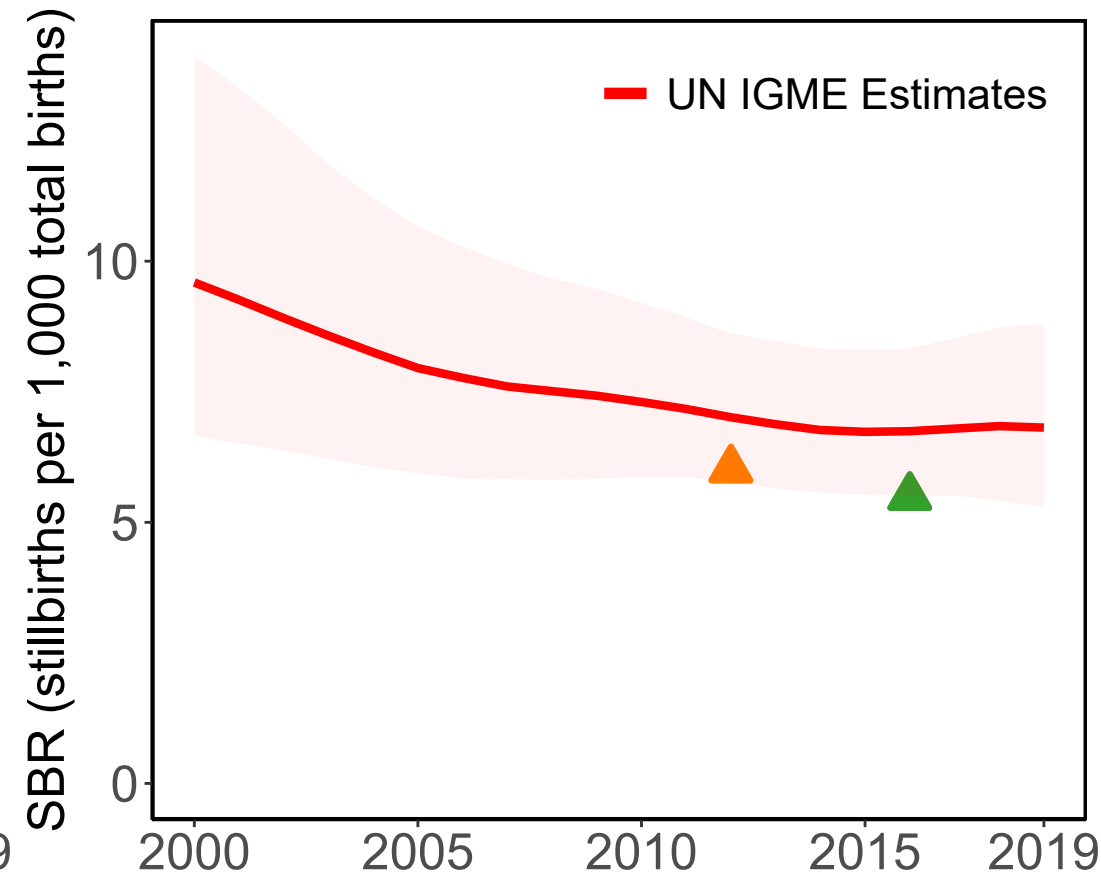

#### Source Types

□ Administrative    △ Survey

#### Data Sources

□ Vital Registration (28wks)

▲ Encuesta Nacional de la Dinámica Demográfica 2018 (Other) (PH) (28wks)

▲ Encuesta Nacional de la Dinámica Demográfica 2014 (Other) (PH) (28wks)

# Marshall Islands

Available Data

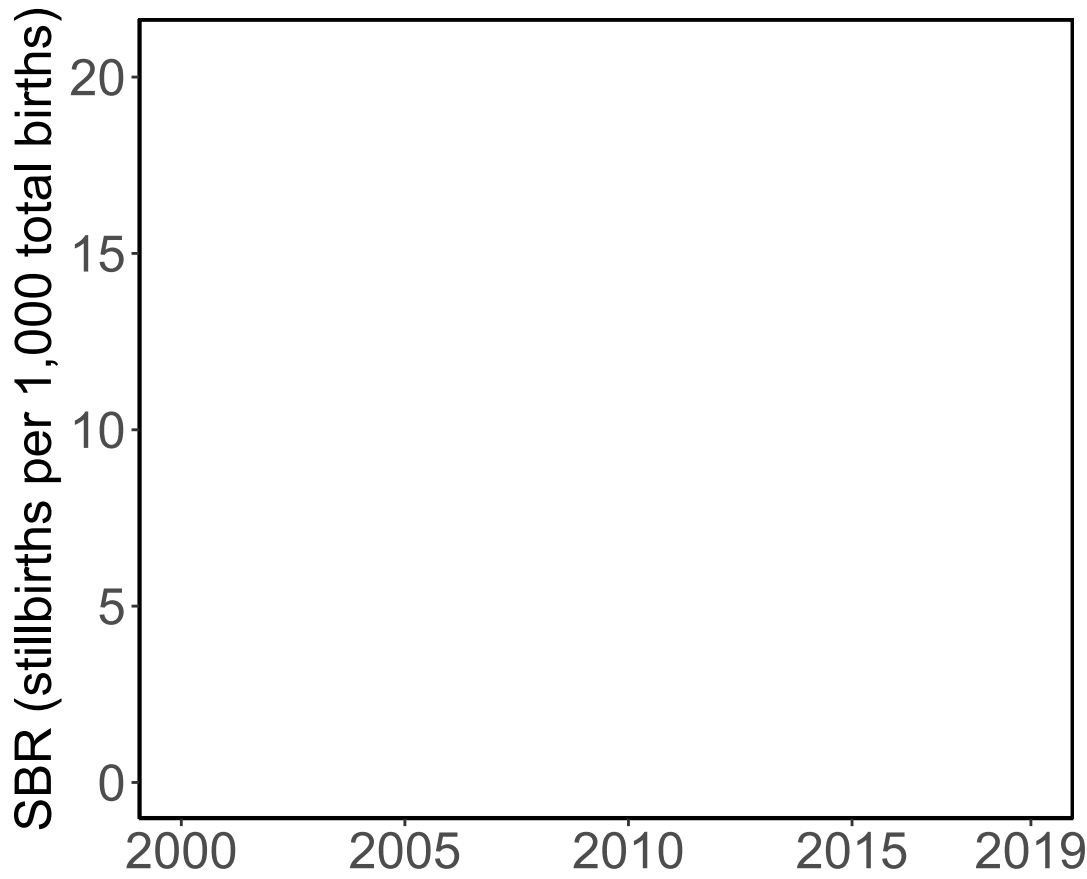

'28+ Weeks of Gestation' Data  
(Incl. Adjusted Data)

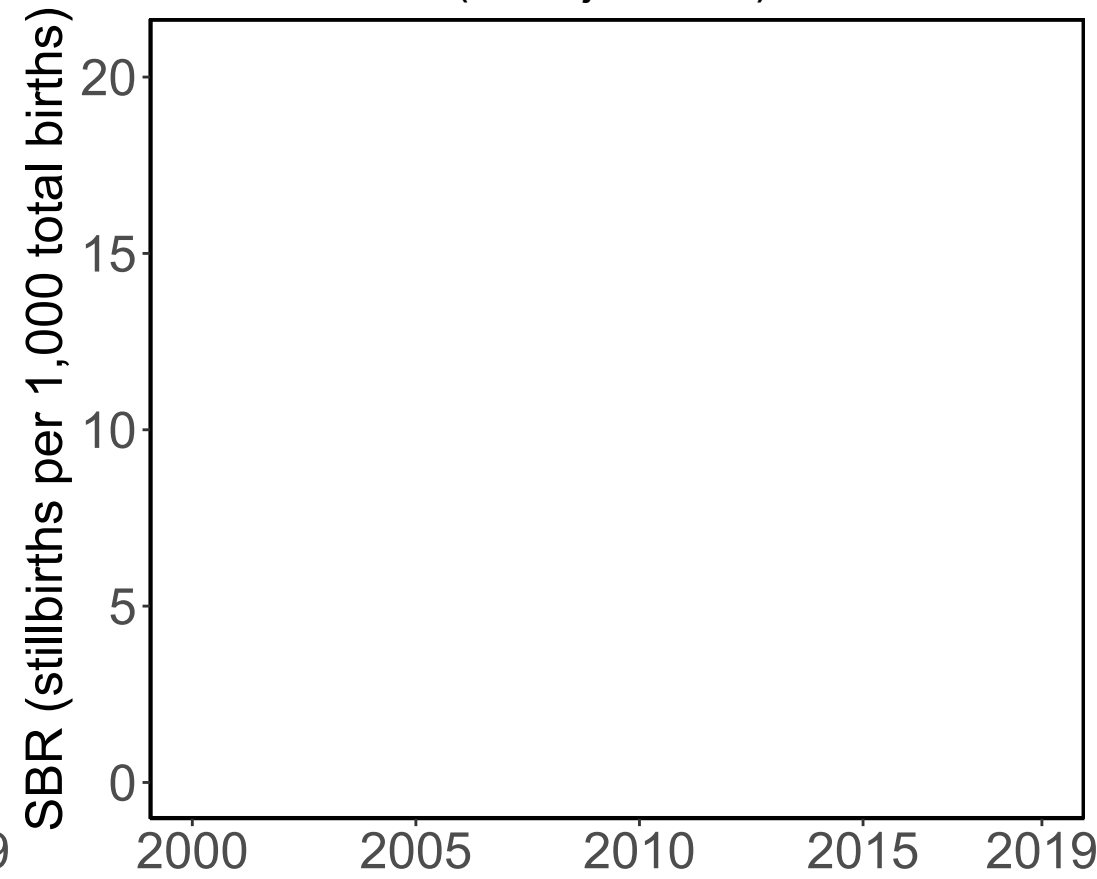

Data Included in the Model

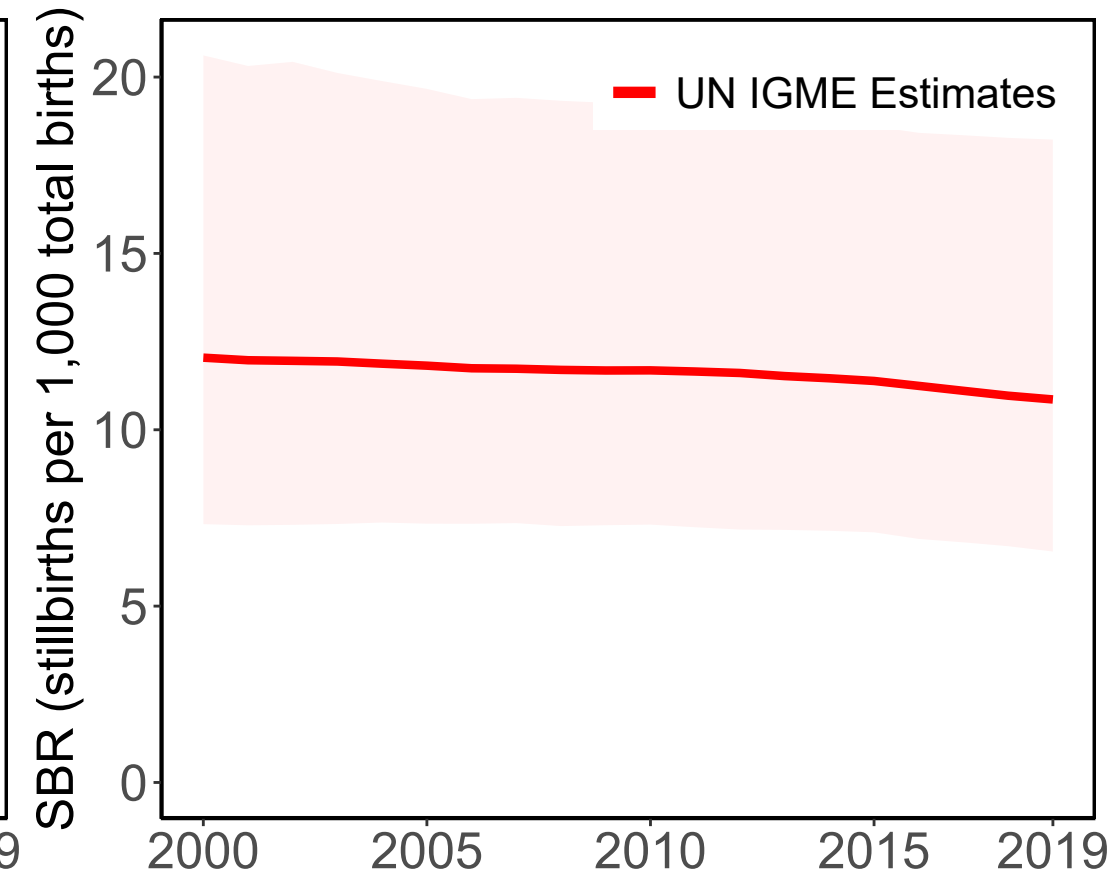

# Republic of North Macedonia

### Available Data

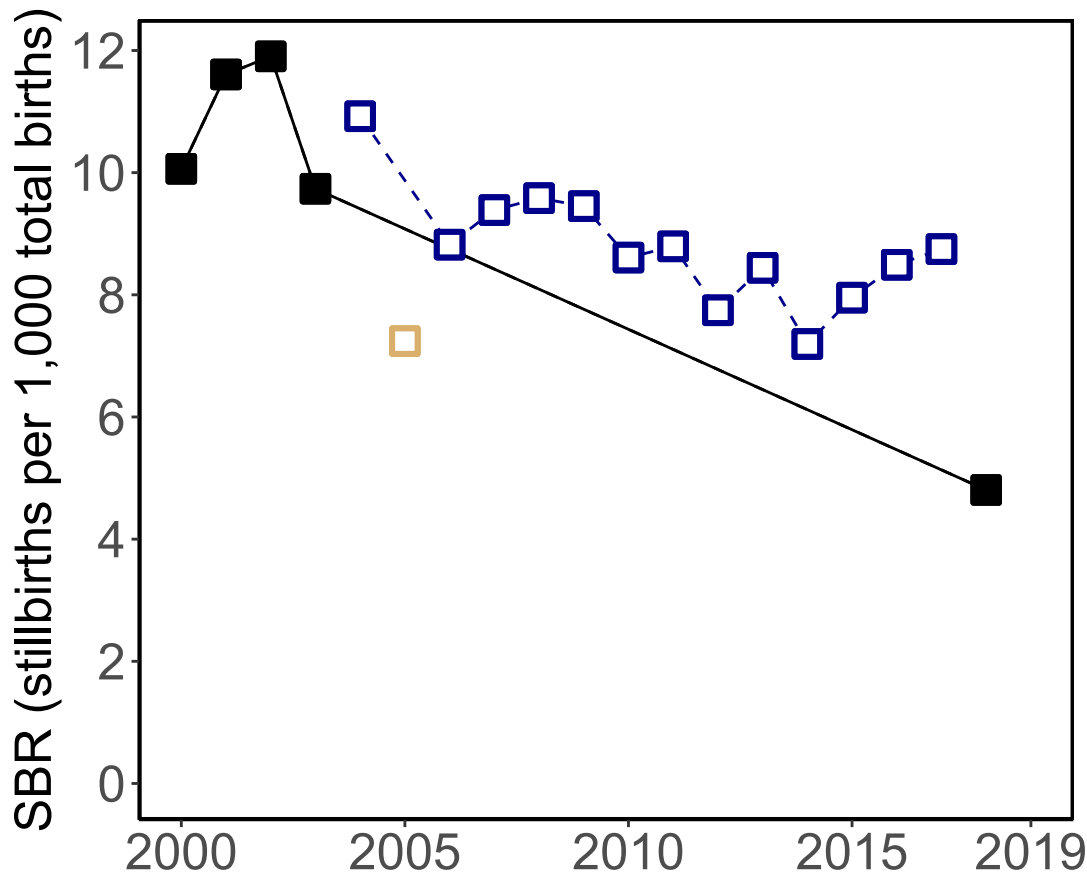

### '28+ Weeks of Gestation' Data (Incl. Adjusted Data)

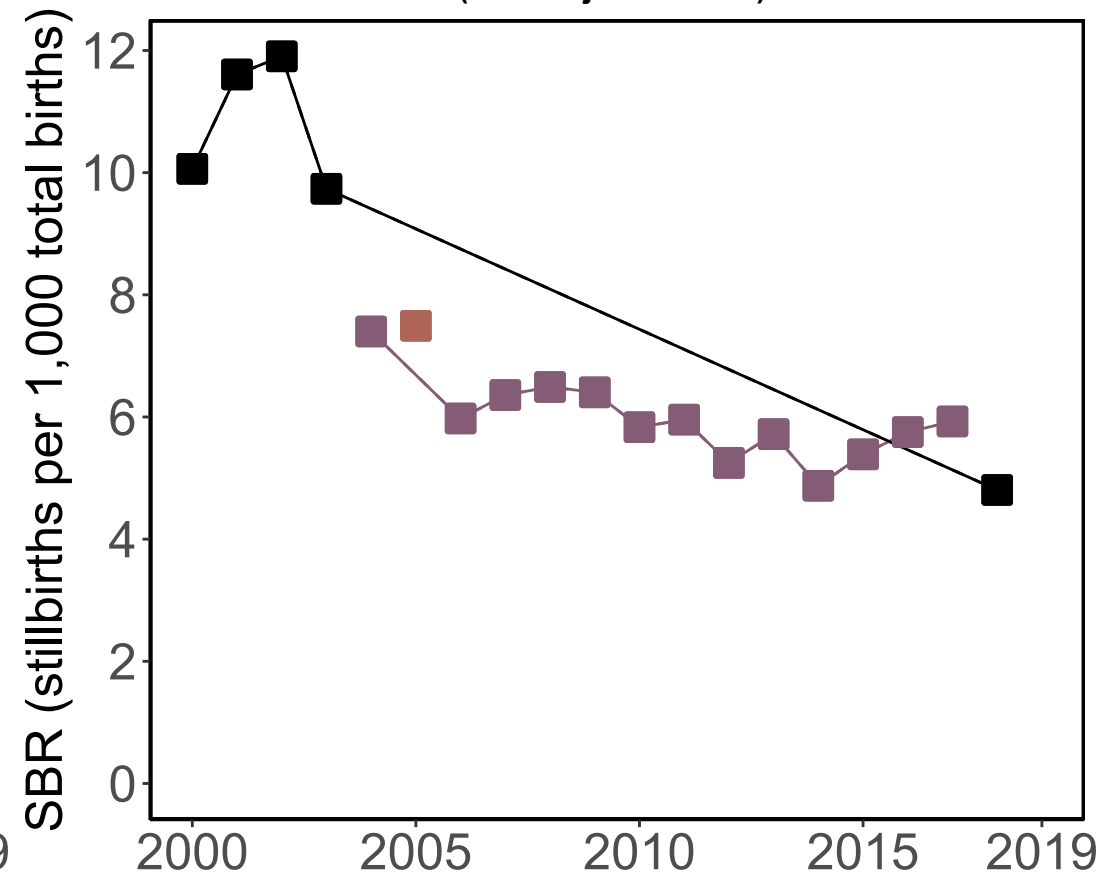

### Data Included in the Model

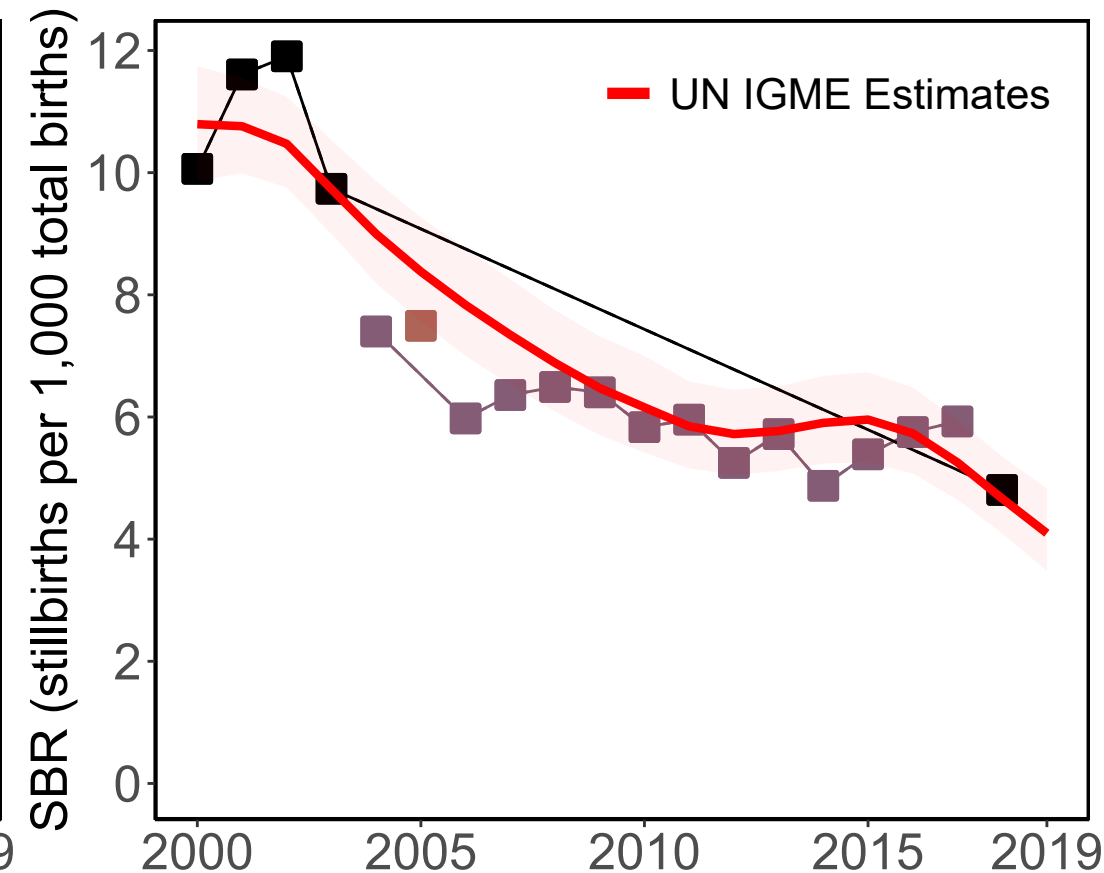

#### Source Types

Administrative

#### Data Sources

Vital Registration (22wks)

Vital Registration (1000g)

Vital Registration (28wks)

Vital Registration (28wks adj from 22wks)

Vital Registration (28wks adj from 1000g)

# Mali

Available Data

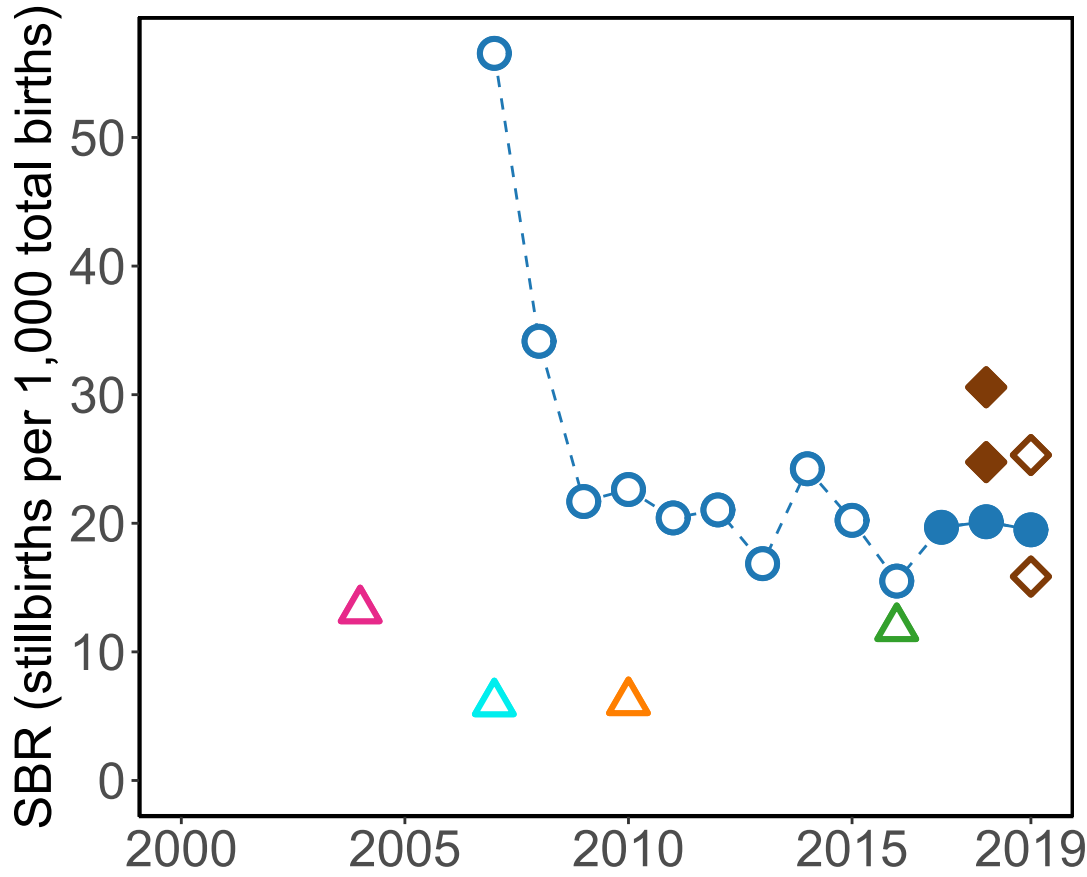

'28+ Weeks of Gestation' Data (Incl. Adjusted Data)

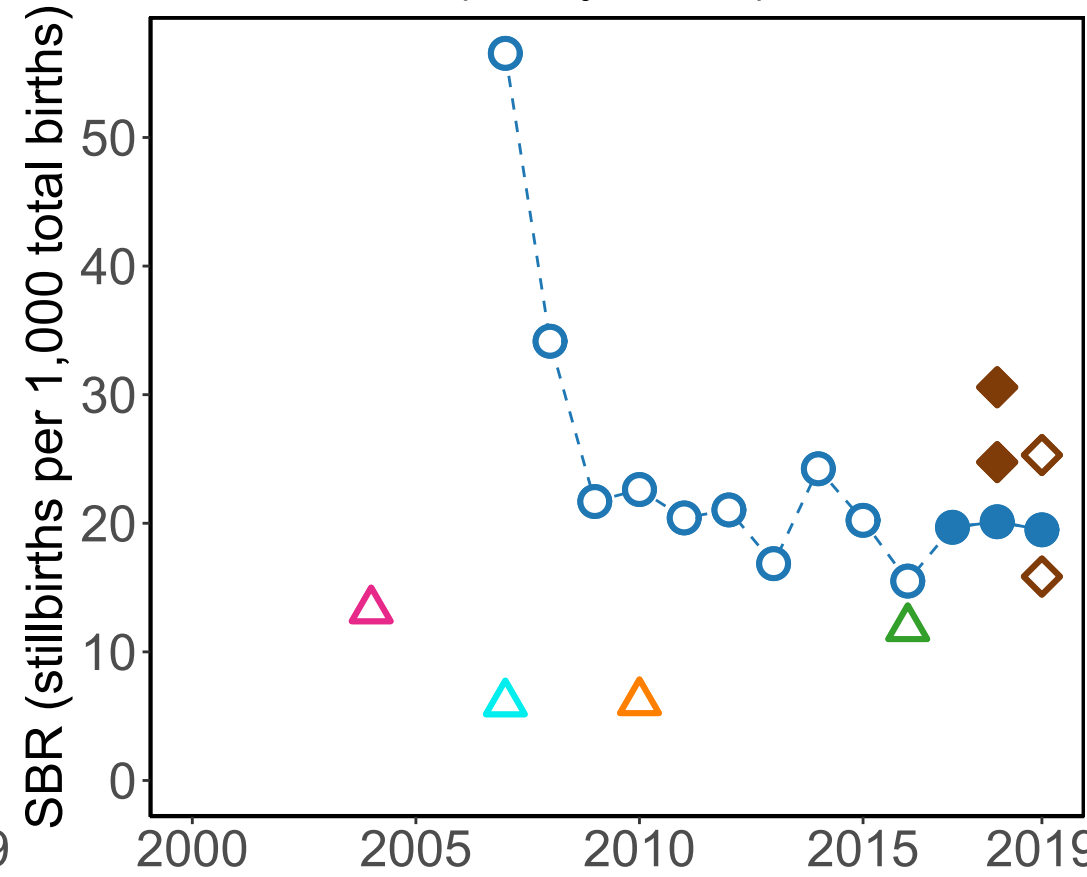

Data Included in the Model

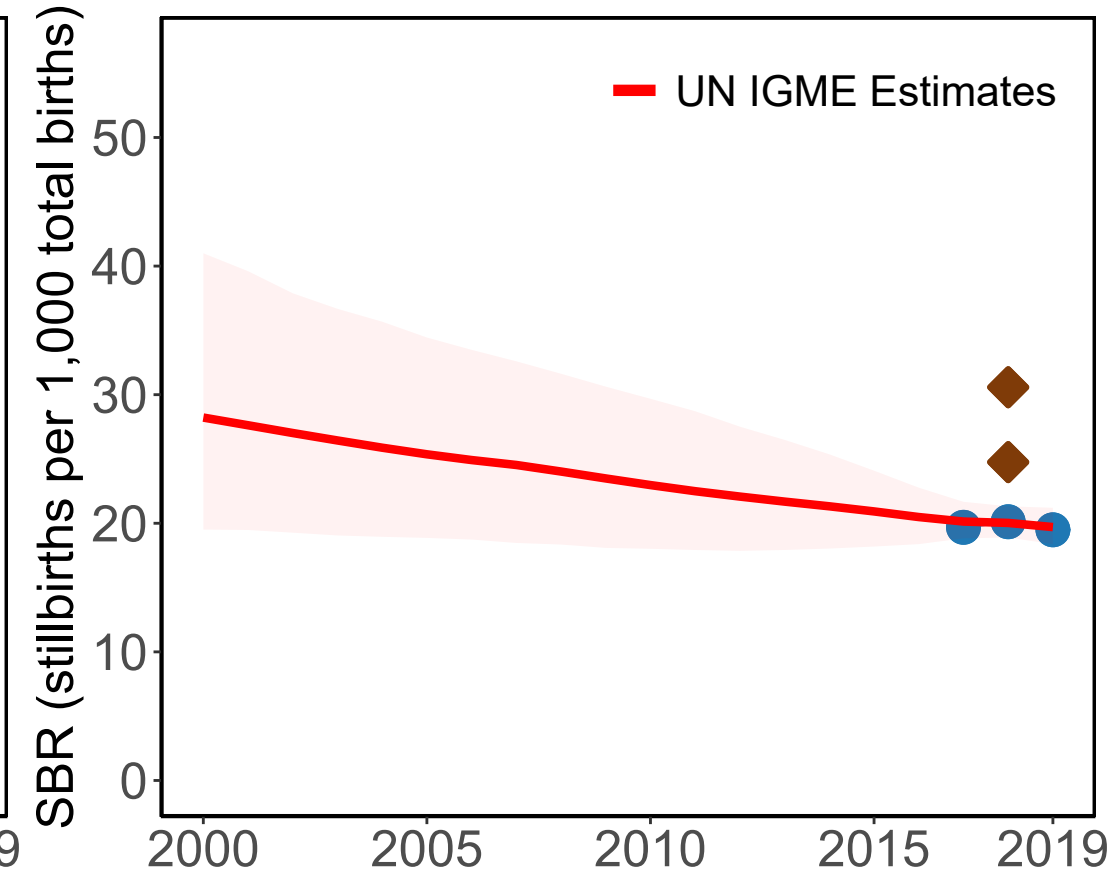

Source Types

- HMIS
- △ Survey
- ◇ Population study

Data Sources

- HMIS-DHIS2 (28wks)
- △ Demographic and Health Survey 2018 (DHS) (RC) (28wks)
- △ Enquête Démographique et de Santé 2012-13 (DHS) (RC) (28wks)
- △ Enquête sur la prévalence de l'Anémie et de la Parasitémie palustre chez les enfants 2010 (DHS) (BH/SQ) (28wks)
- △ Enquête démographique et de santé 2006 (DHS) (RC) (28wks)
- ◇ CHAMPS (28wks)

# Malta

### Available Data

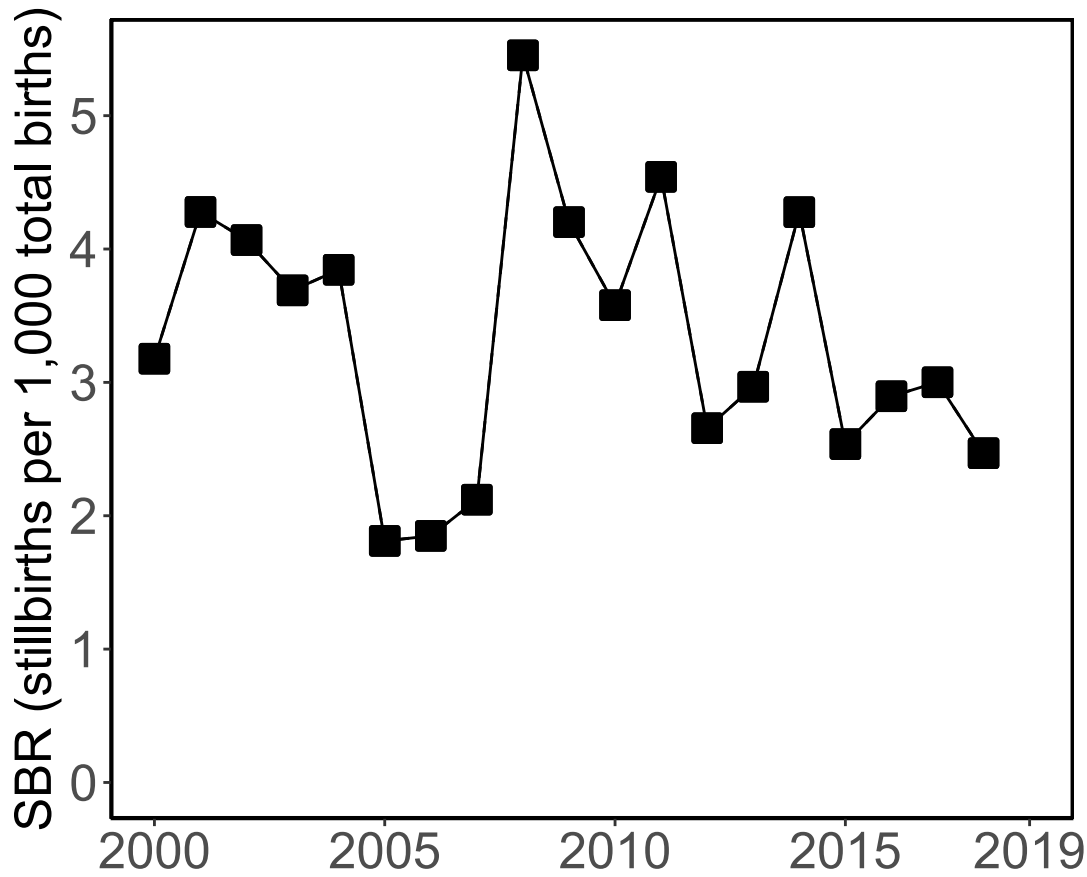

### '28+ Weeks of Gestation' Data (Incl. Adjusted Data)

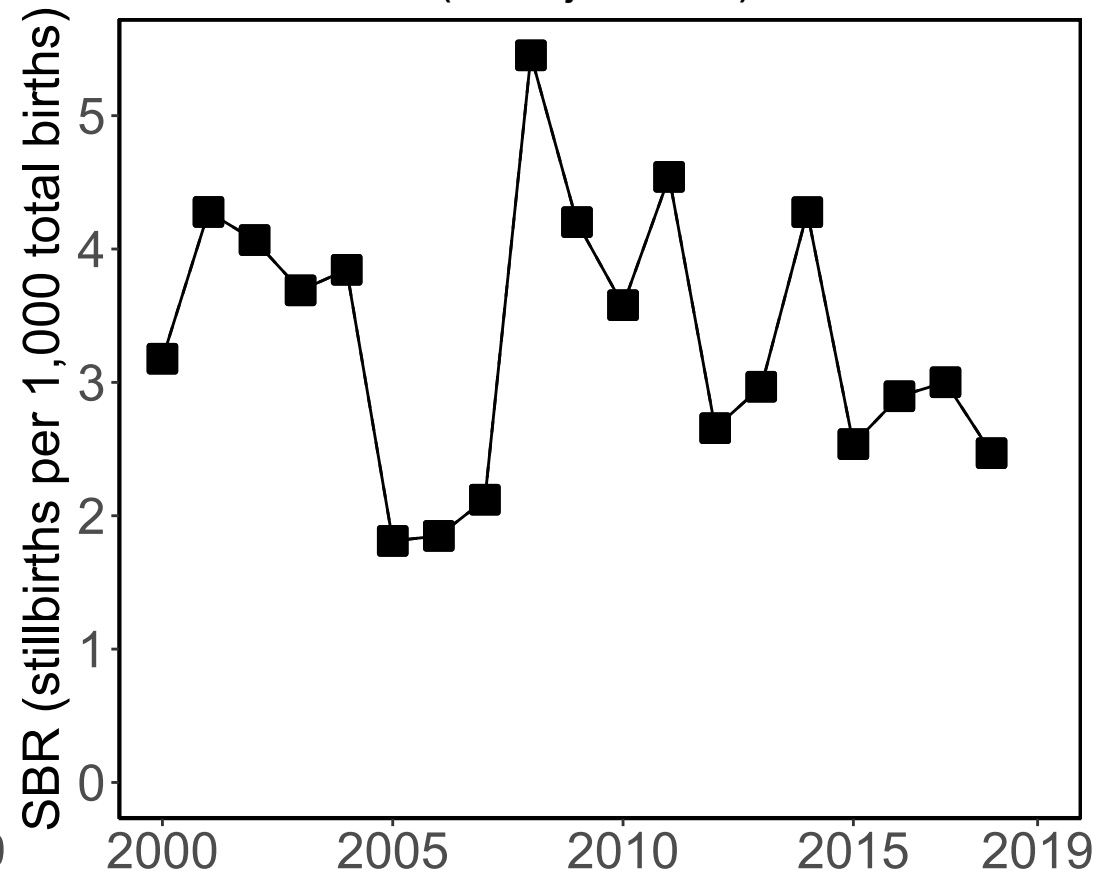

### Data Included in the Model

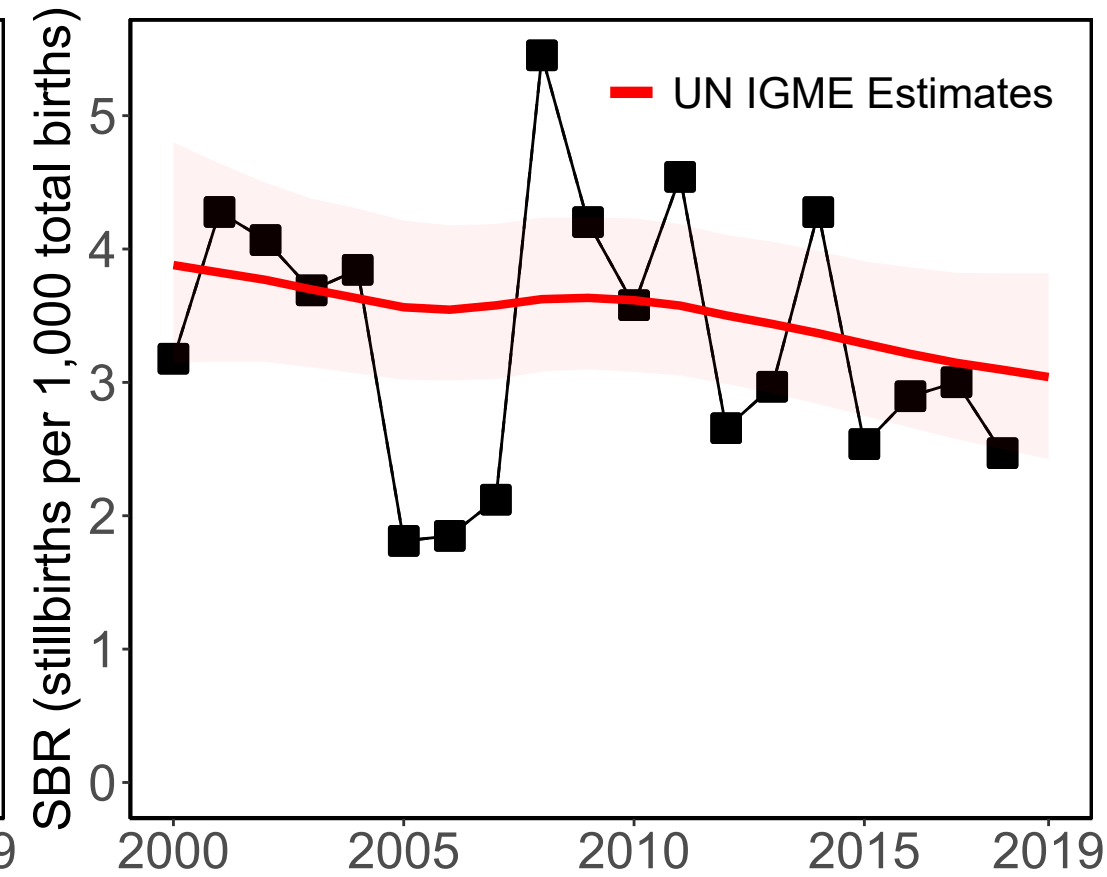

#### Source Types

□ Administrative

#### Data Sources

■ Vital Registration (28wks)

# Myanmar

### Available Data

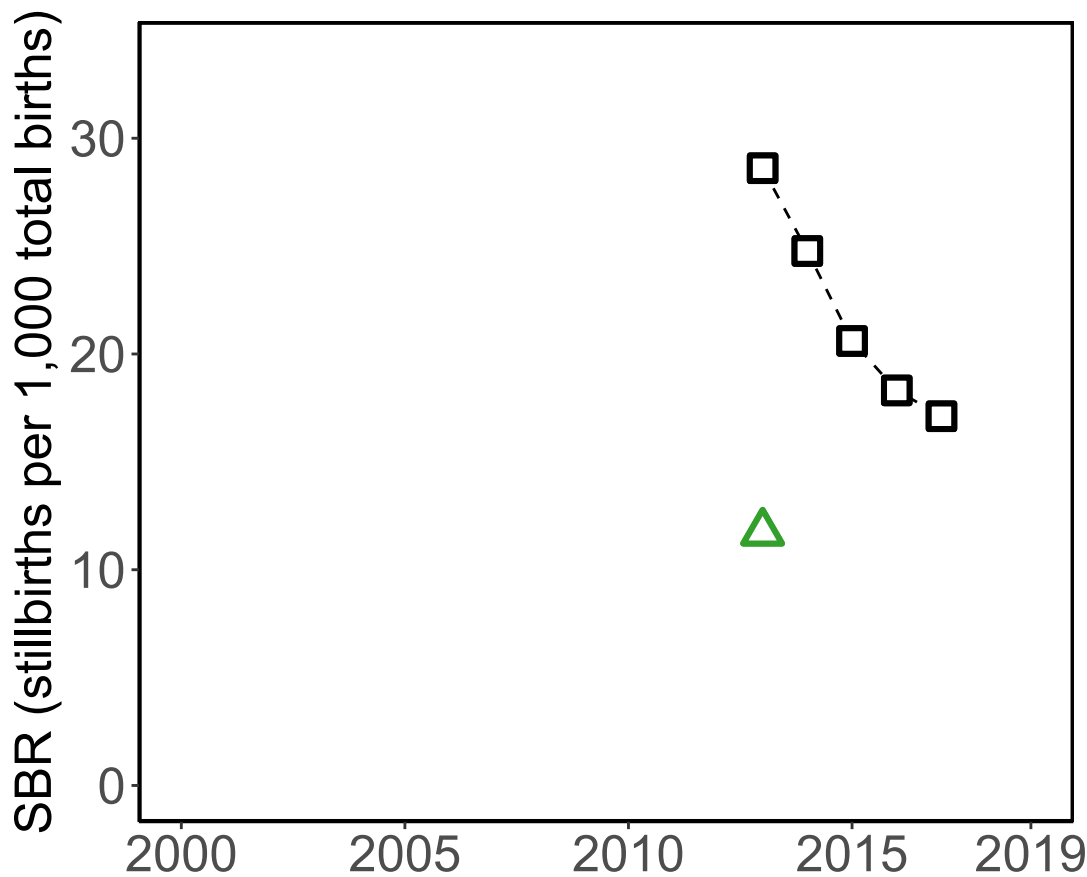

### '28+ Weeks of Gestation' Data (Incl. Adjusted Data)

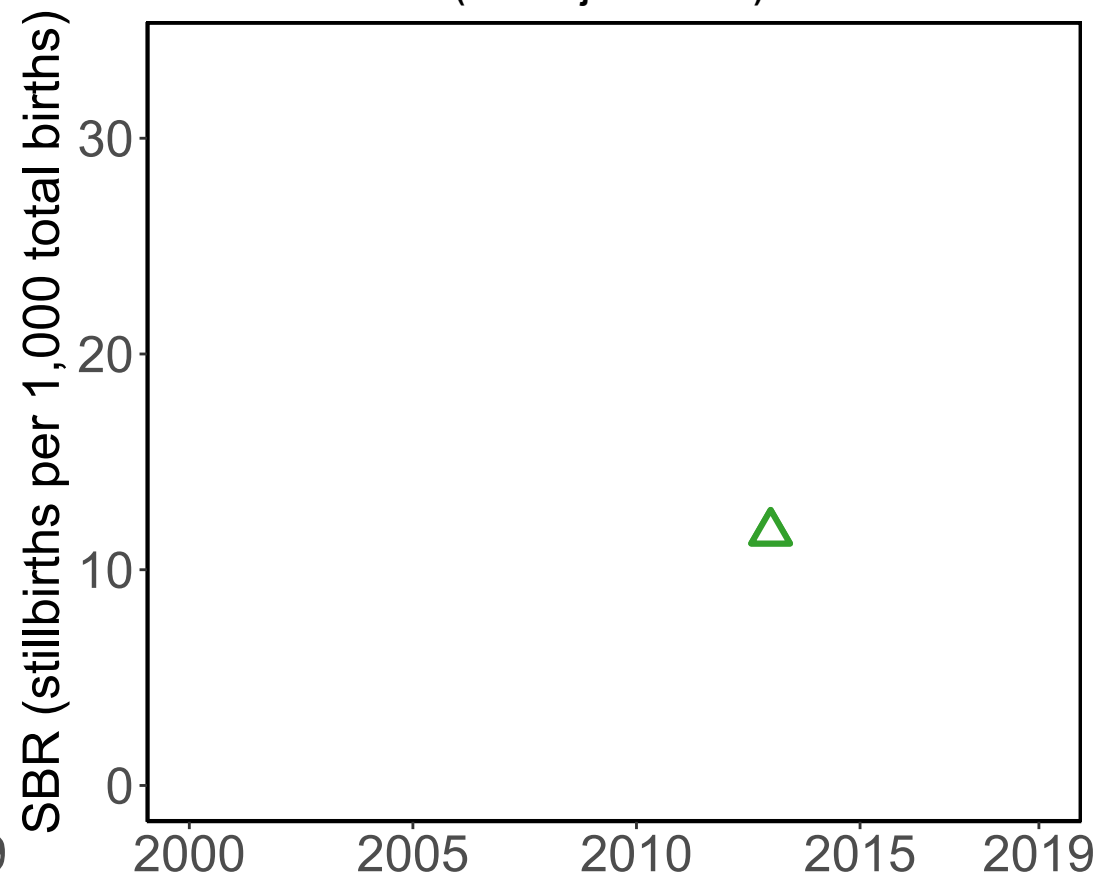

### Data Included in the Model

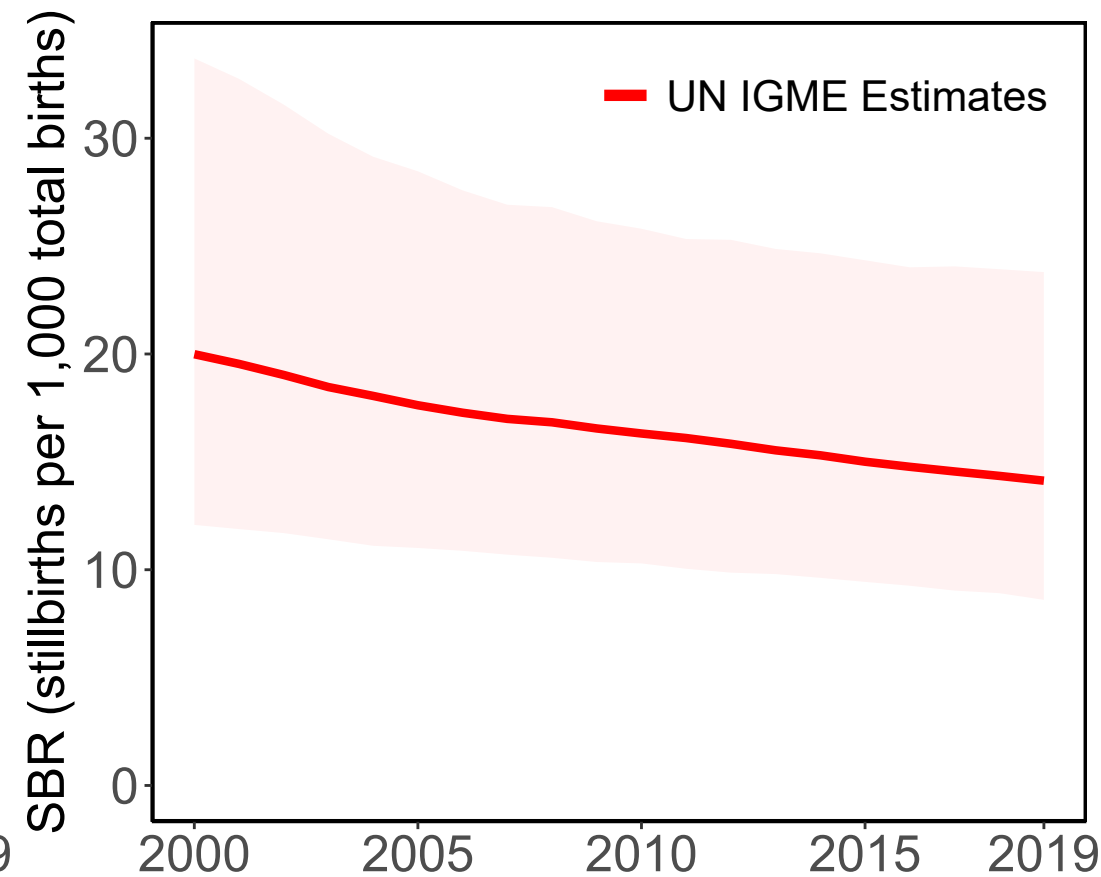

#### Source Types

□ Administrative    △ Survey

#### Data Sources

□ Vital Registration (not defined)    △ Demographic and Health Survey 2015-16 (DHS) (RC) (28wks)



# Montenegro

### Available Data

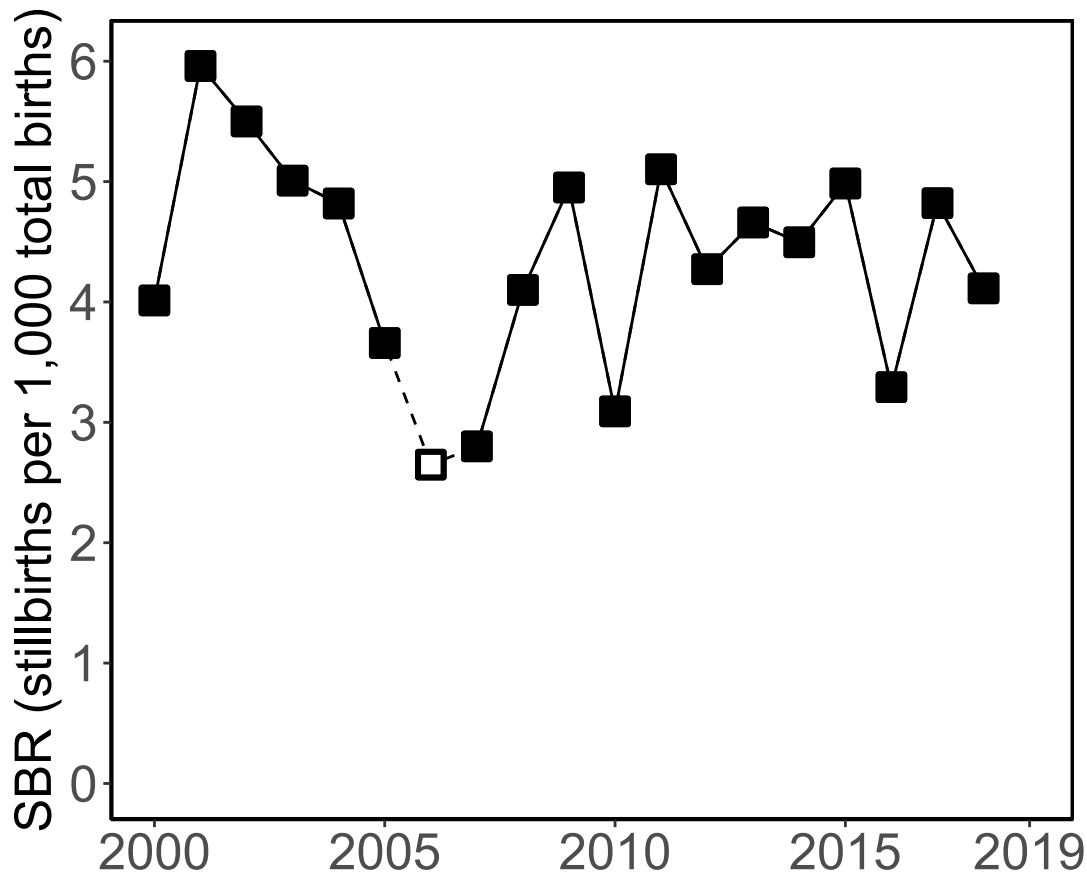

### '28+ Weeks of Gestation' Data (Incl. Adjusted Data)

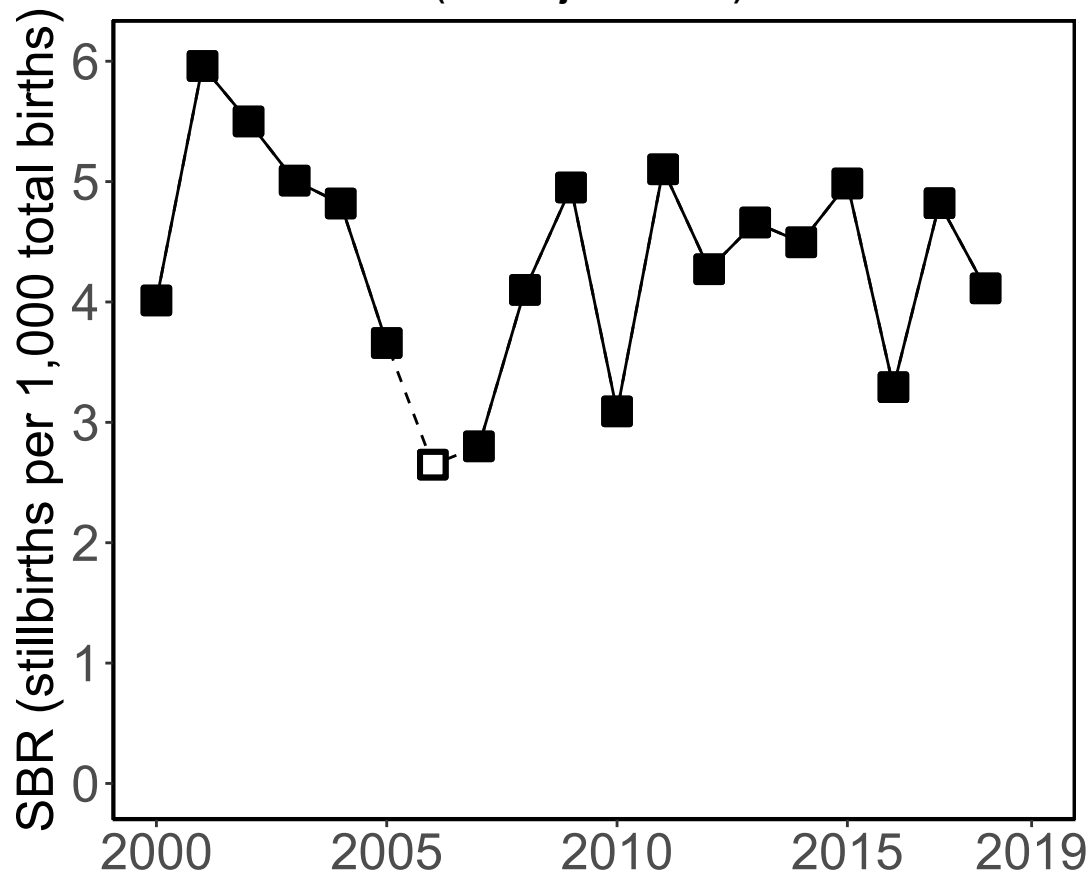

### Data Included in the Model

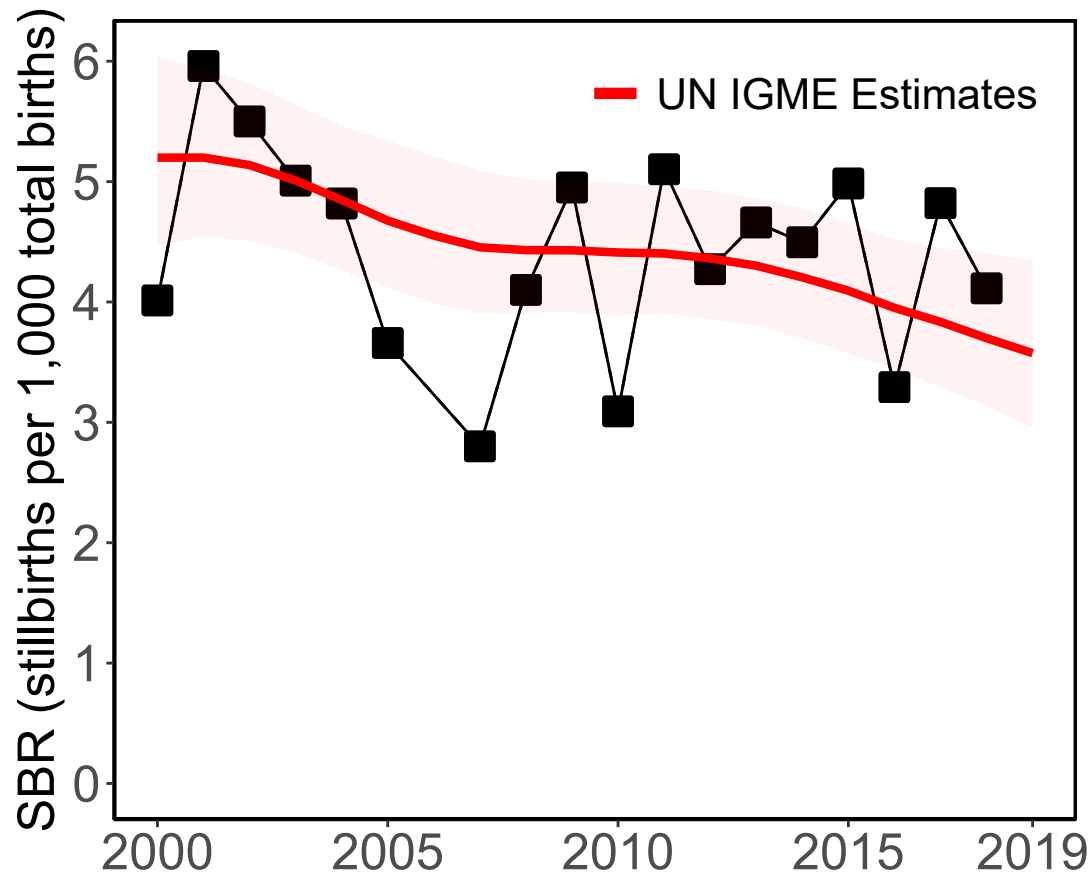

#### Source Types

□ Administrative

#### Data Sources

■ Vital Registration (28wks)

# Mongolia

### Available Data

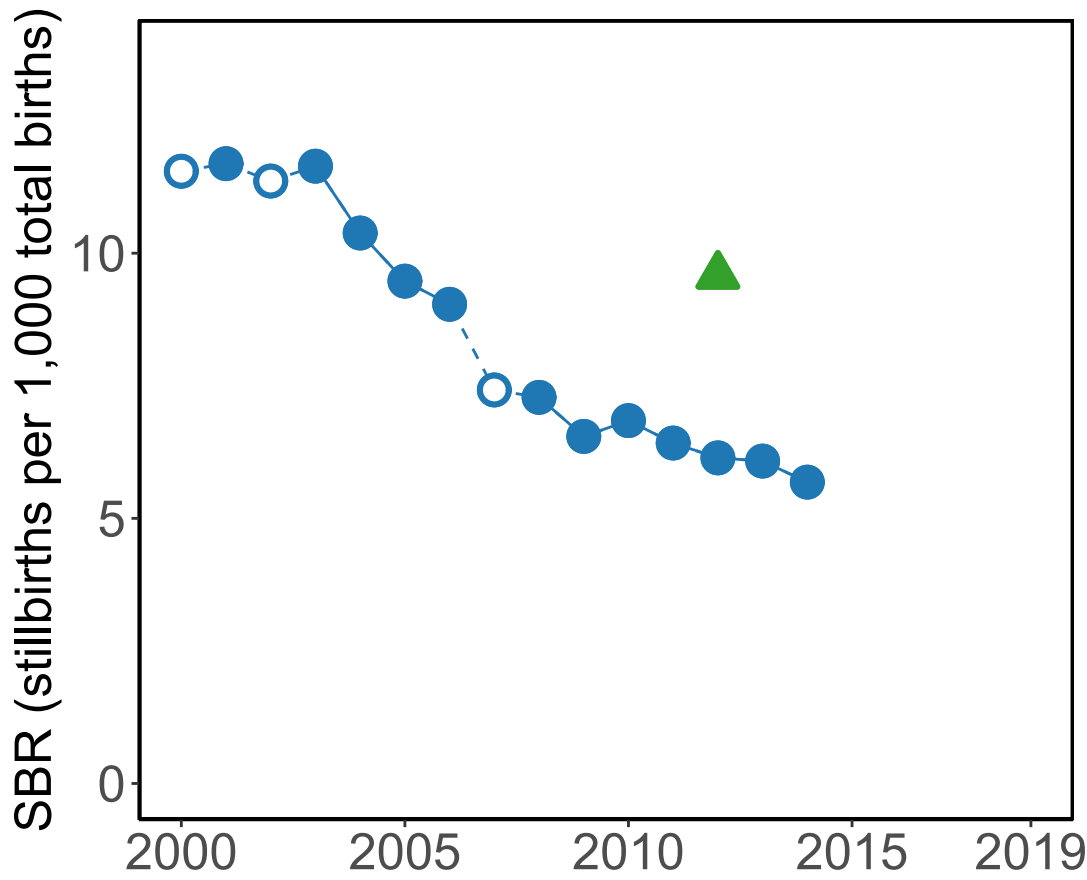

### '28+ Weeks of Gestation' Data (Incl. Adjusted Data)

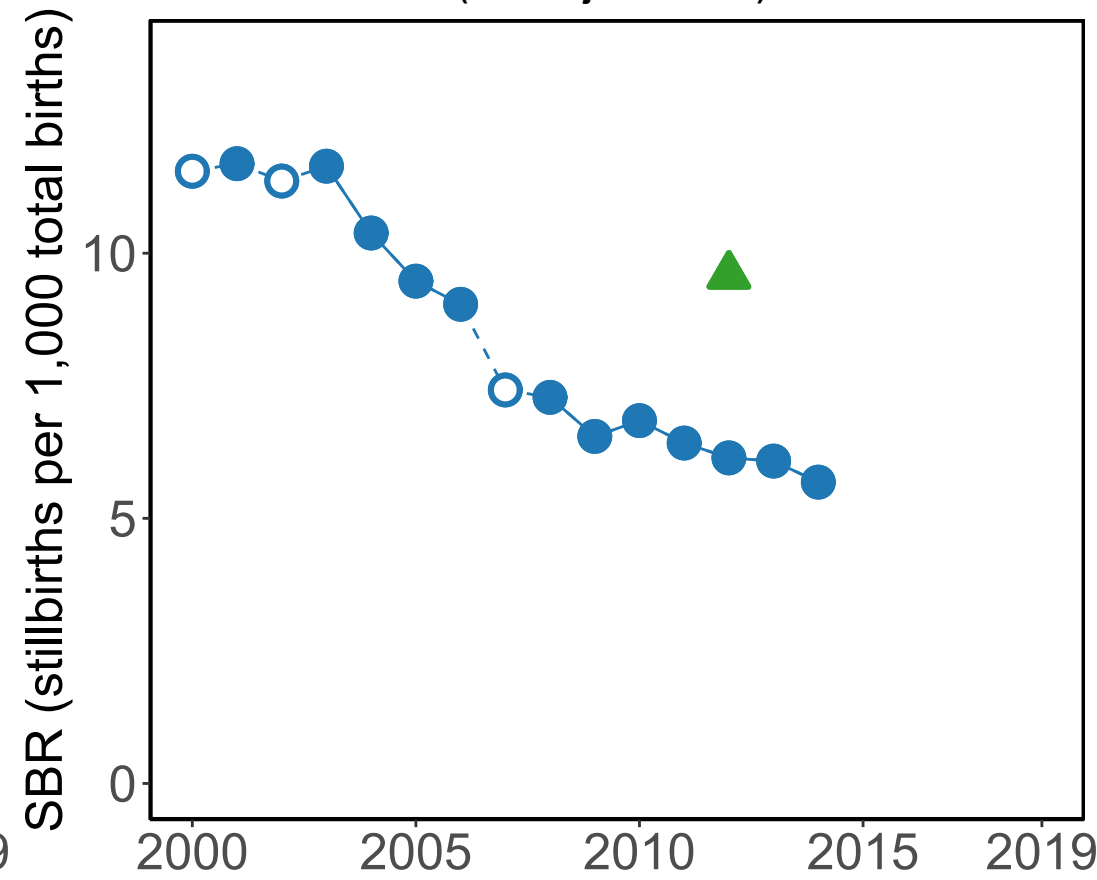

### Data Included in the Model

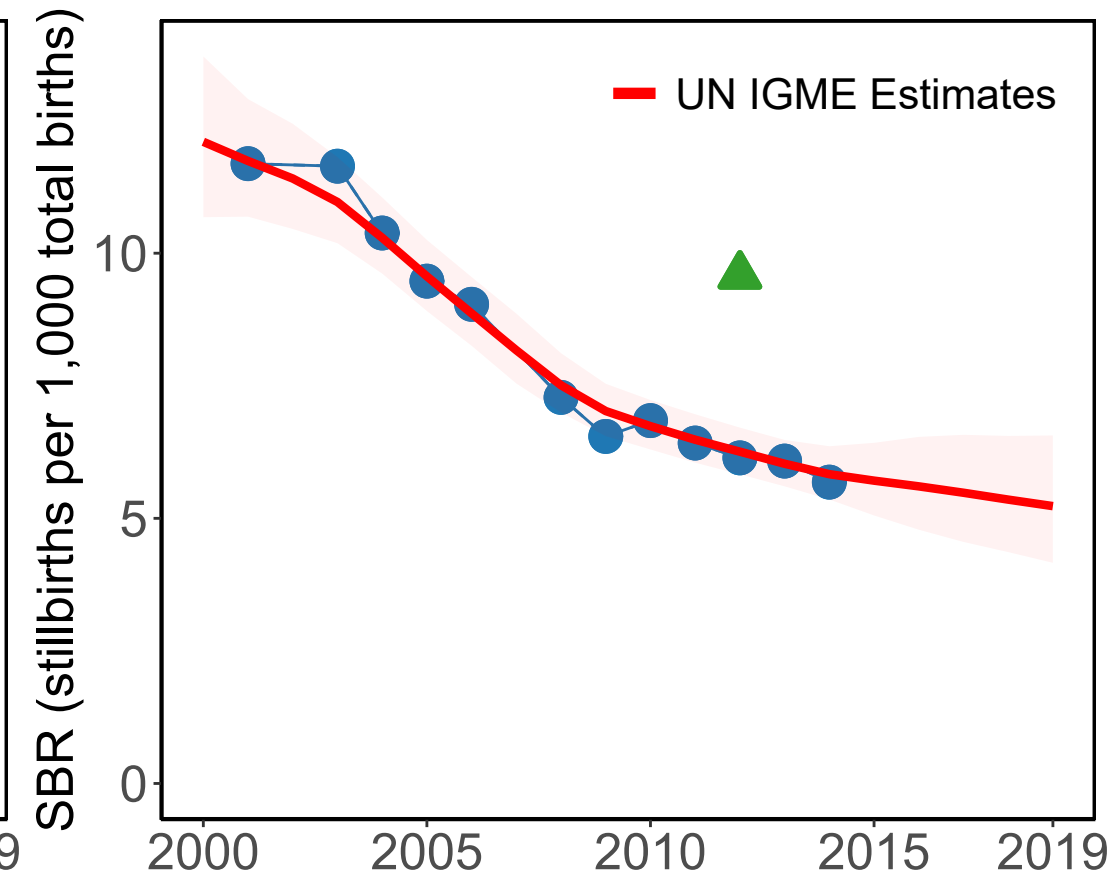

#### Source Types

○ HMIS   △ Survey

#### Data Sources

● HMIS-DHIS2 (28wks)

▲ Multiple Indicator Cluster Survey 2013-14 (MICS) (PH) (28wks)

# Mozambique

Available Data

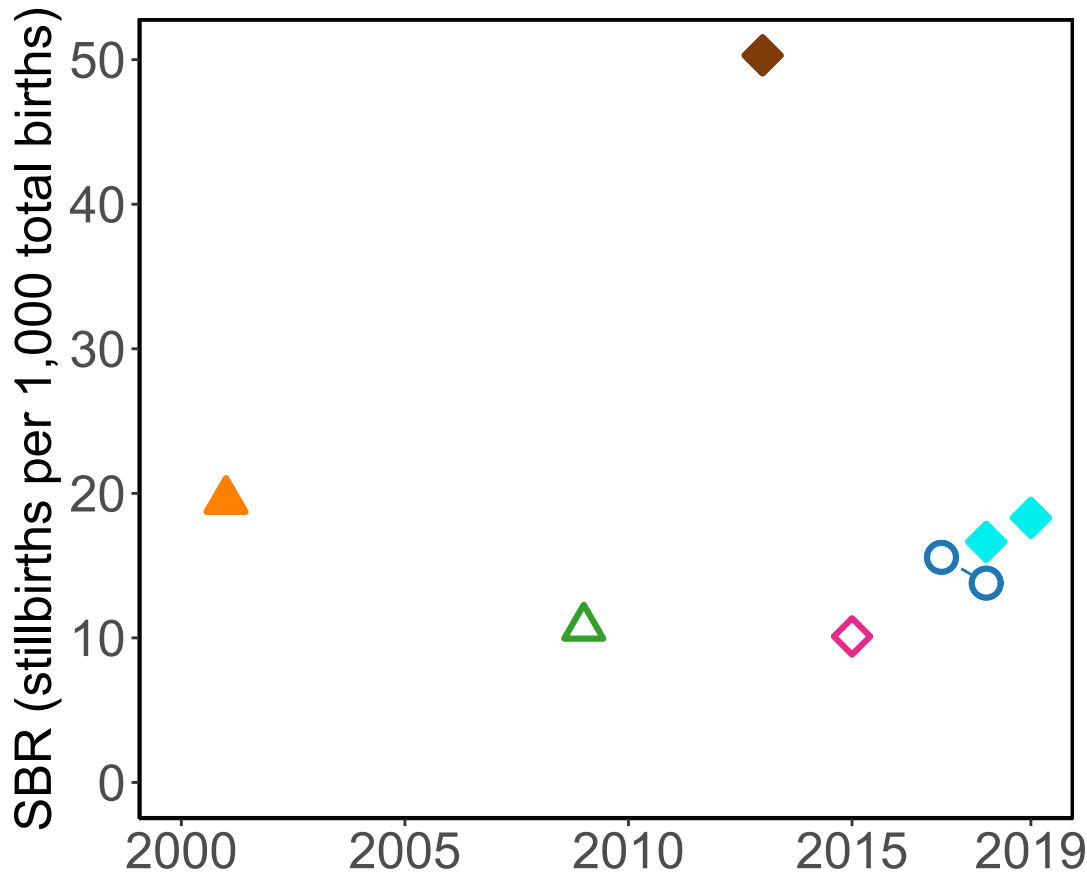

'28+ Weeks of Gestation' Data  
(Incl. Adjusted Data)

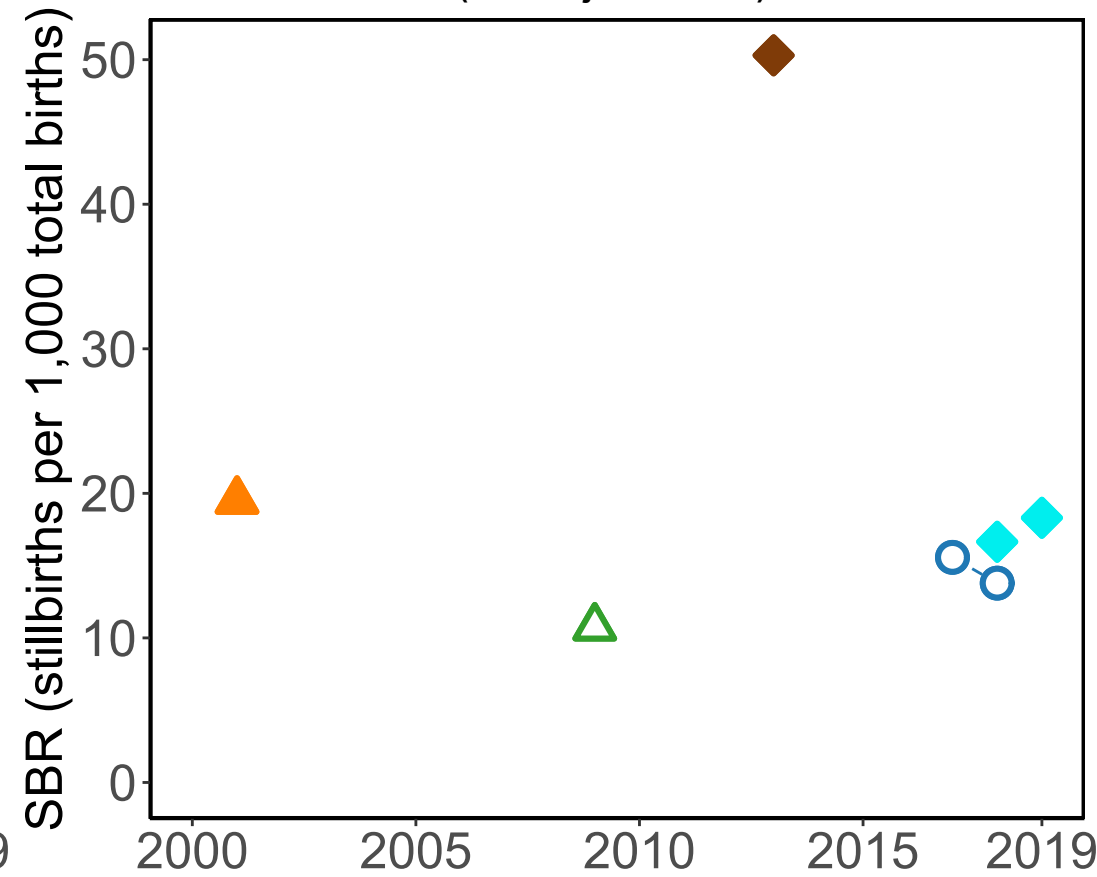

Data Included in the Model

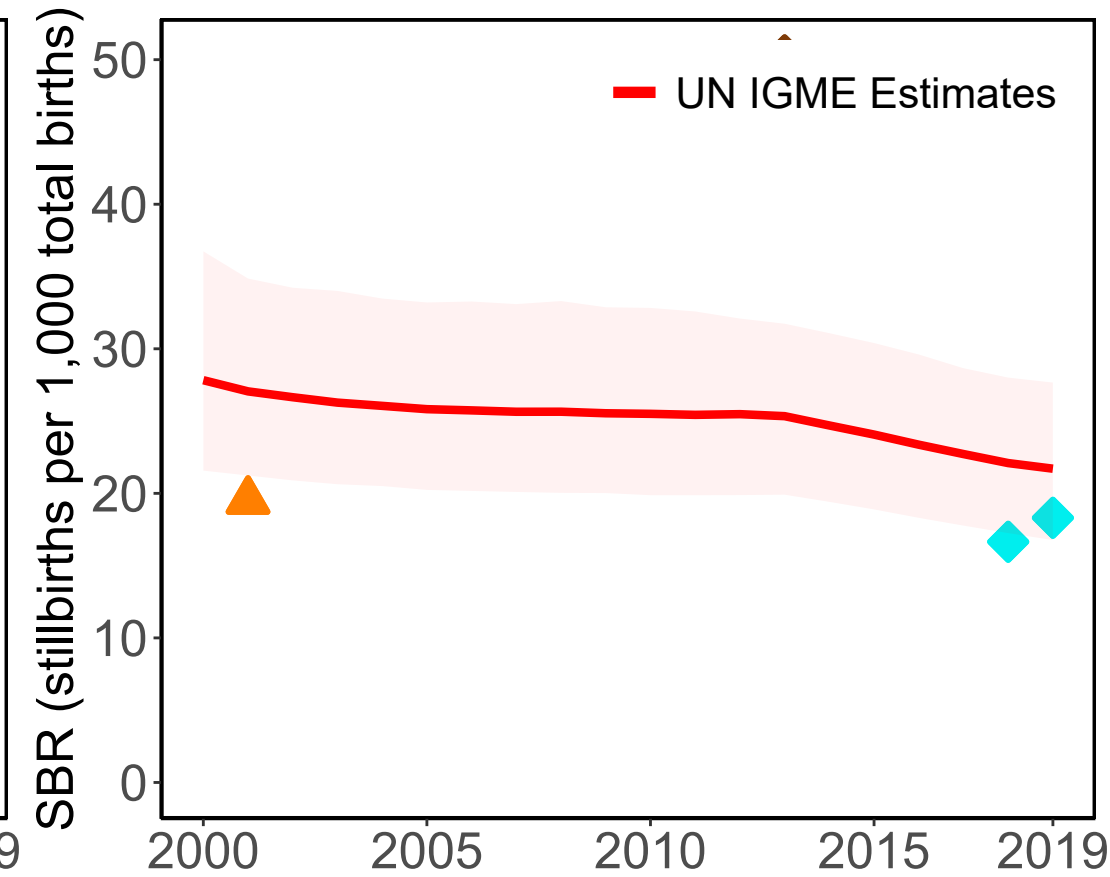

Source Types

- HMIS
- △ Survey
- ◇ Population study

Data Sources

- HMIS-DHIS2 (28wks)
- △ Demographic and Health Survey 2011 (DHS) (RC) (28wks)
- ◇ Arnaldo 2018 (not defined)
- ◇ Sacoor 2018 (28wks)
- △ Inquérito Demográfico e de Saúde 2003 (DHS) (RC) (28wks)
- ◇ CHAMPS (28wks)

# Mauritania

Available Data

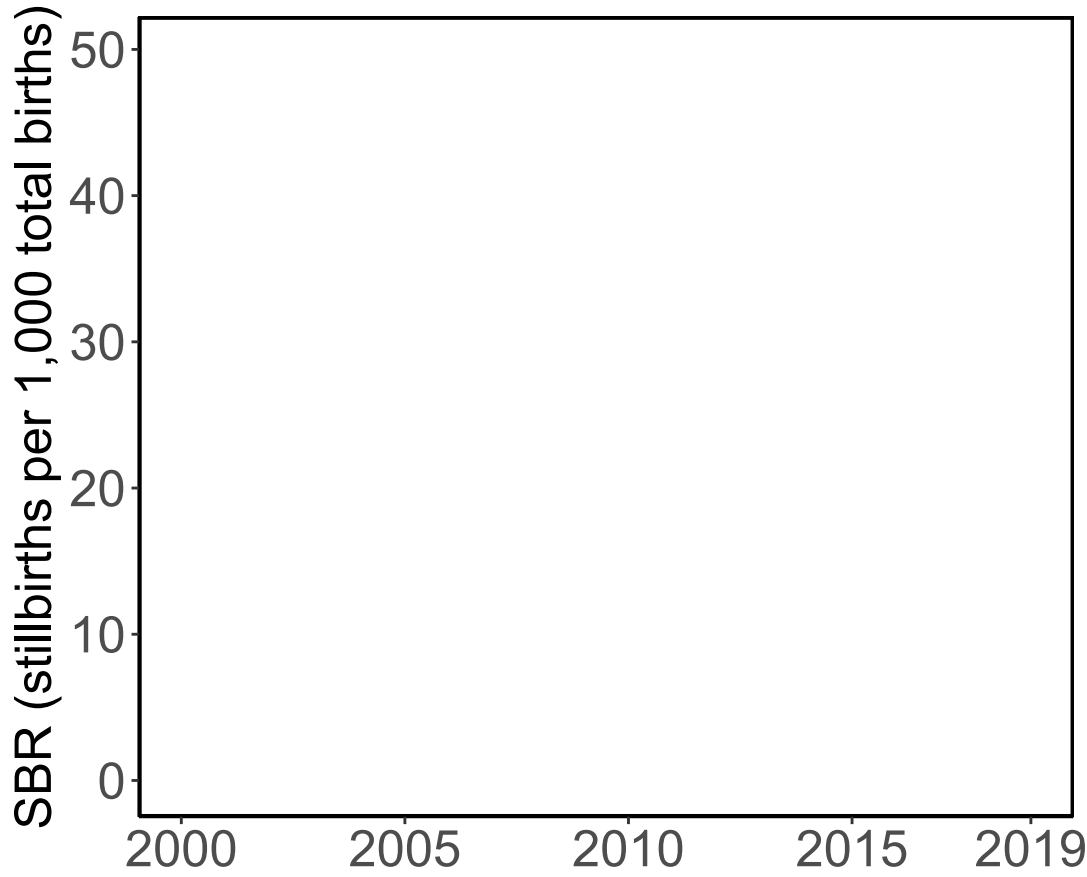

'28+ Weeks of Gestation' Data  
(Incl. Adjusted Data)

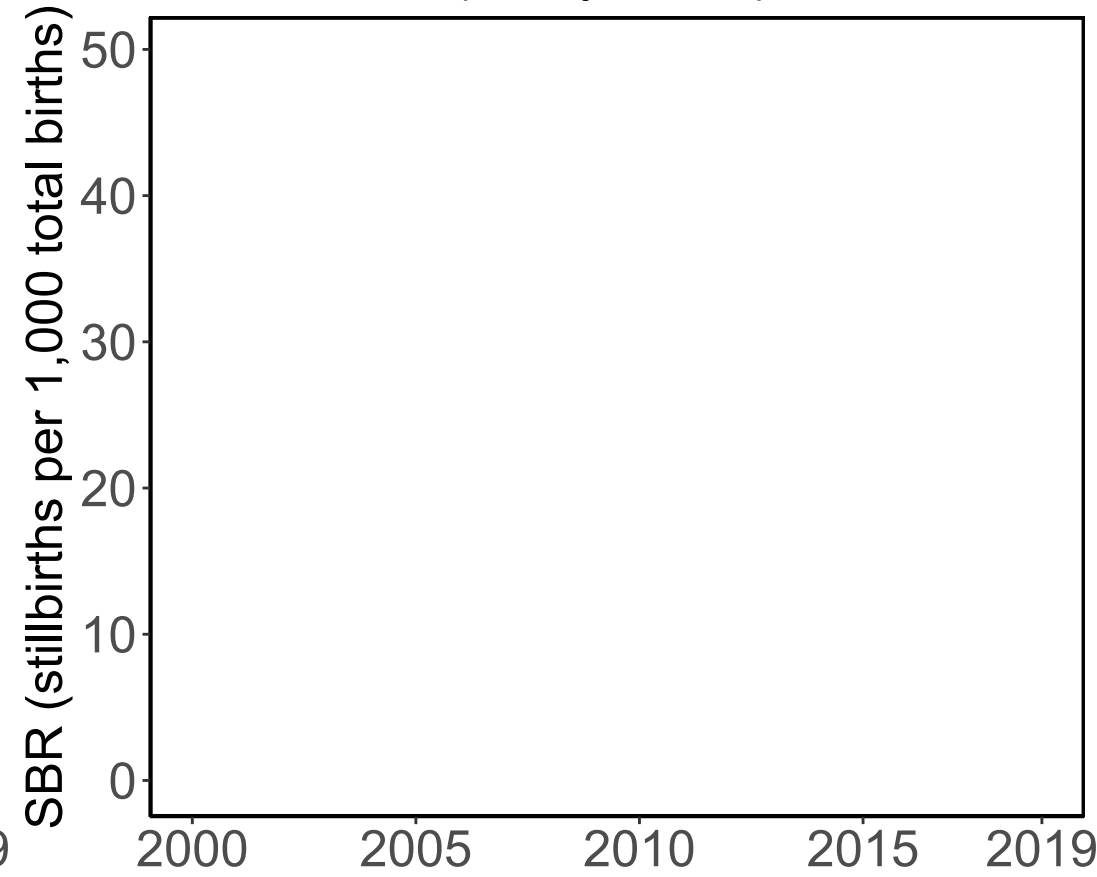

Data Included in the Model

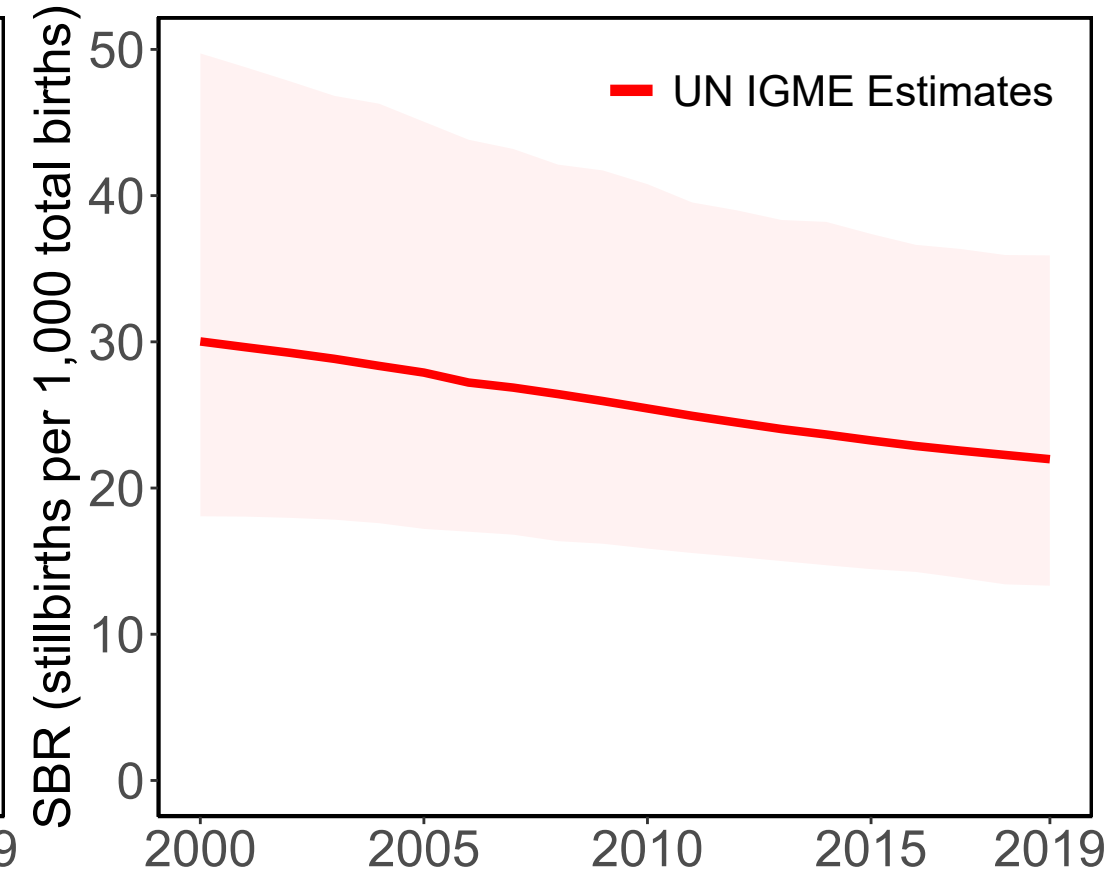

# Mauritius

### Available Data

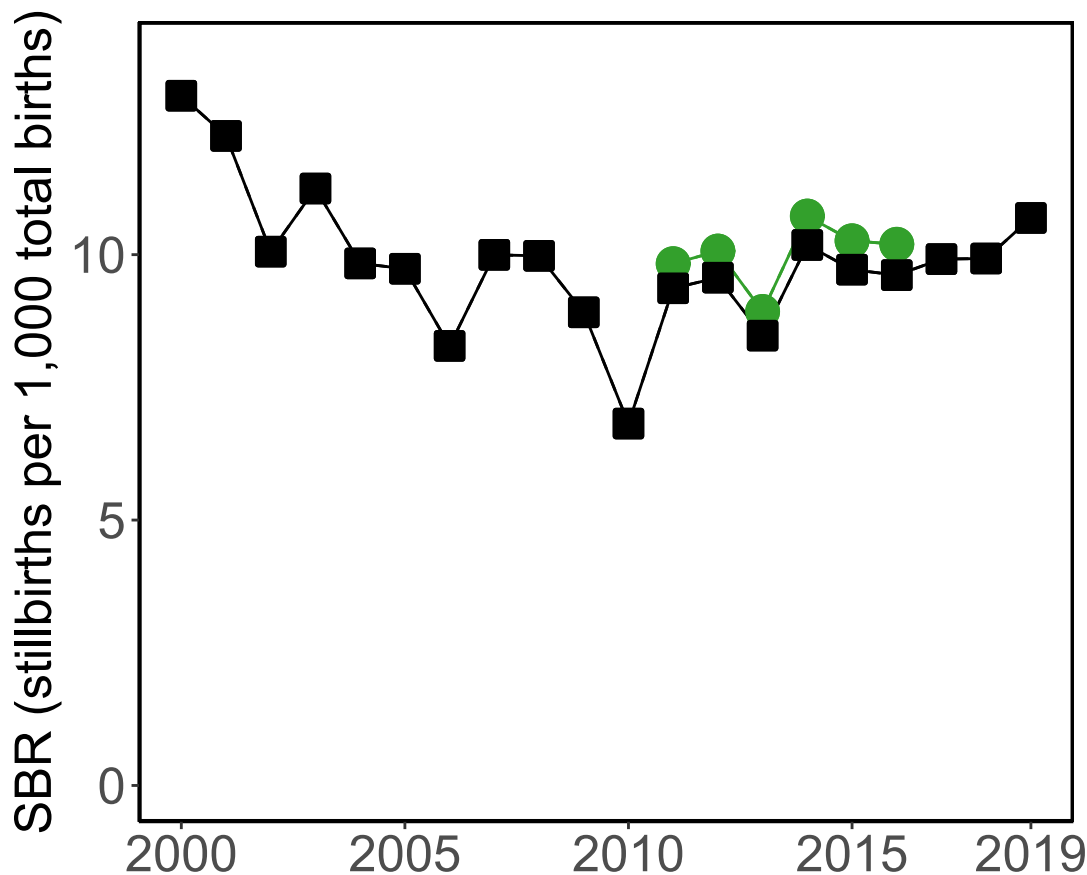

### '28+ Weeks of Gestation' Data (Incl. Adjusted Data)

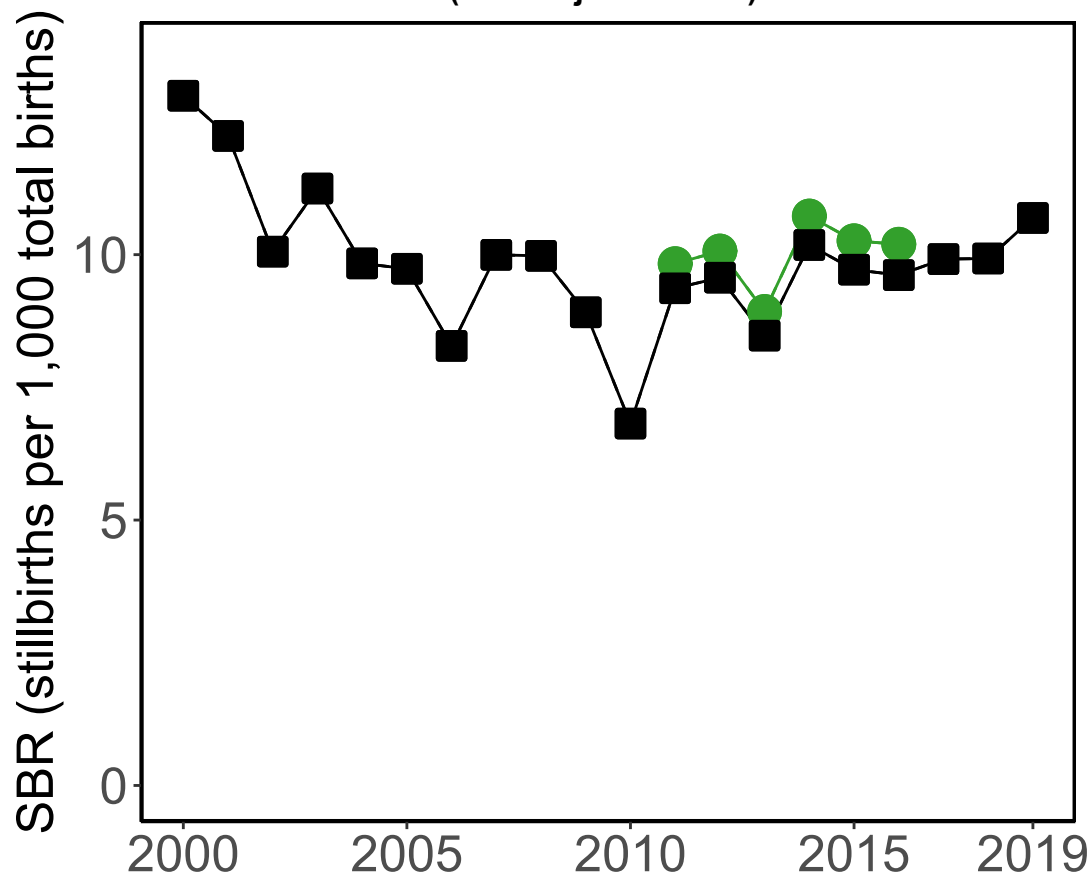

### Data Included in the Model

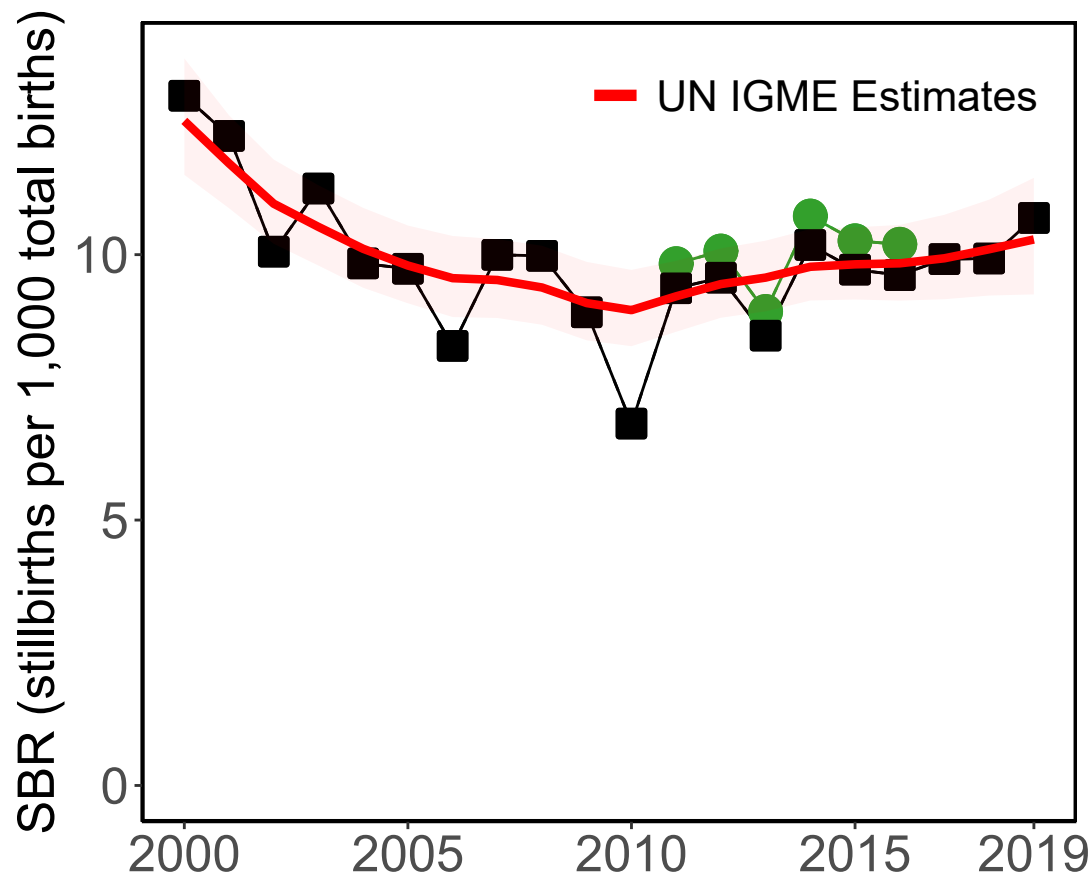

#### Source Types

Administrative HMIS

#### Data Sources

Vital Registration (28wks) HMIS-DHIS2 (28wks)

# Malawi

Available Data

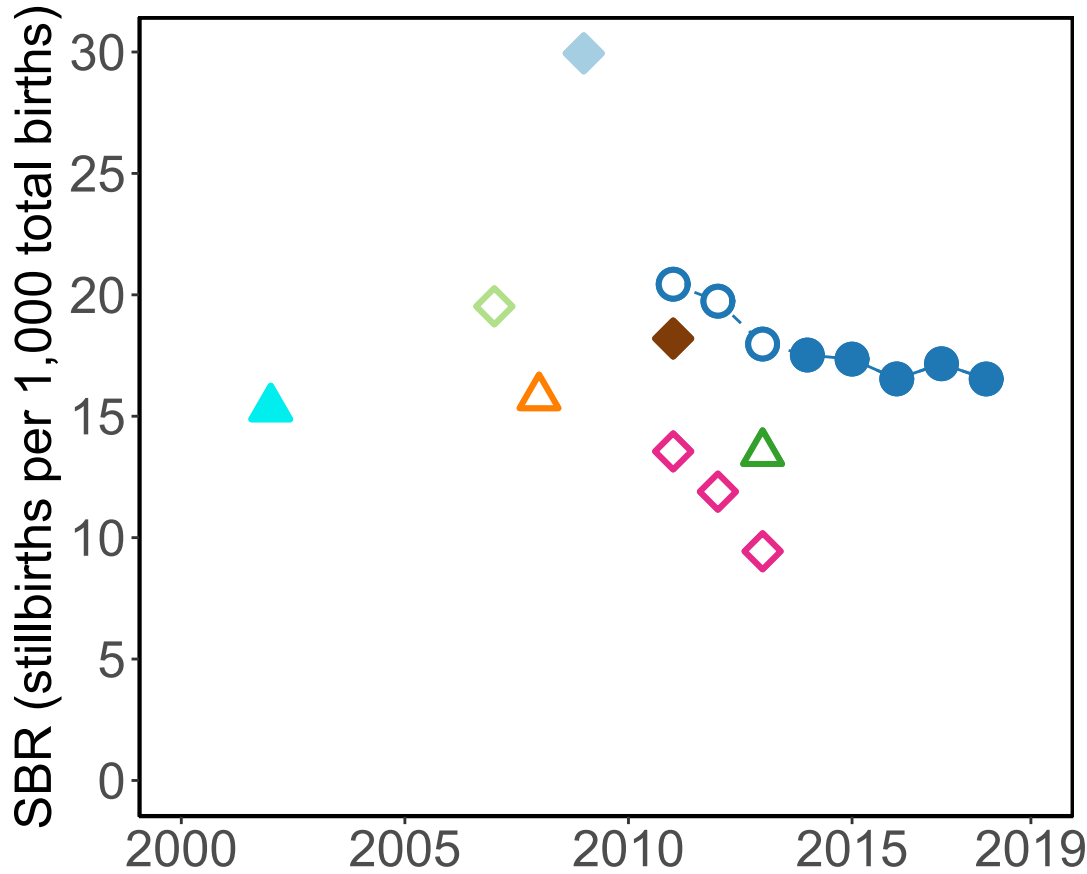

'28+ Weeks of Gestation' Data (Incl. Adjusted Data)

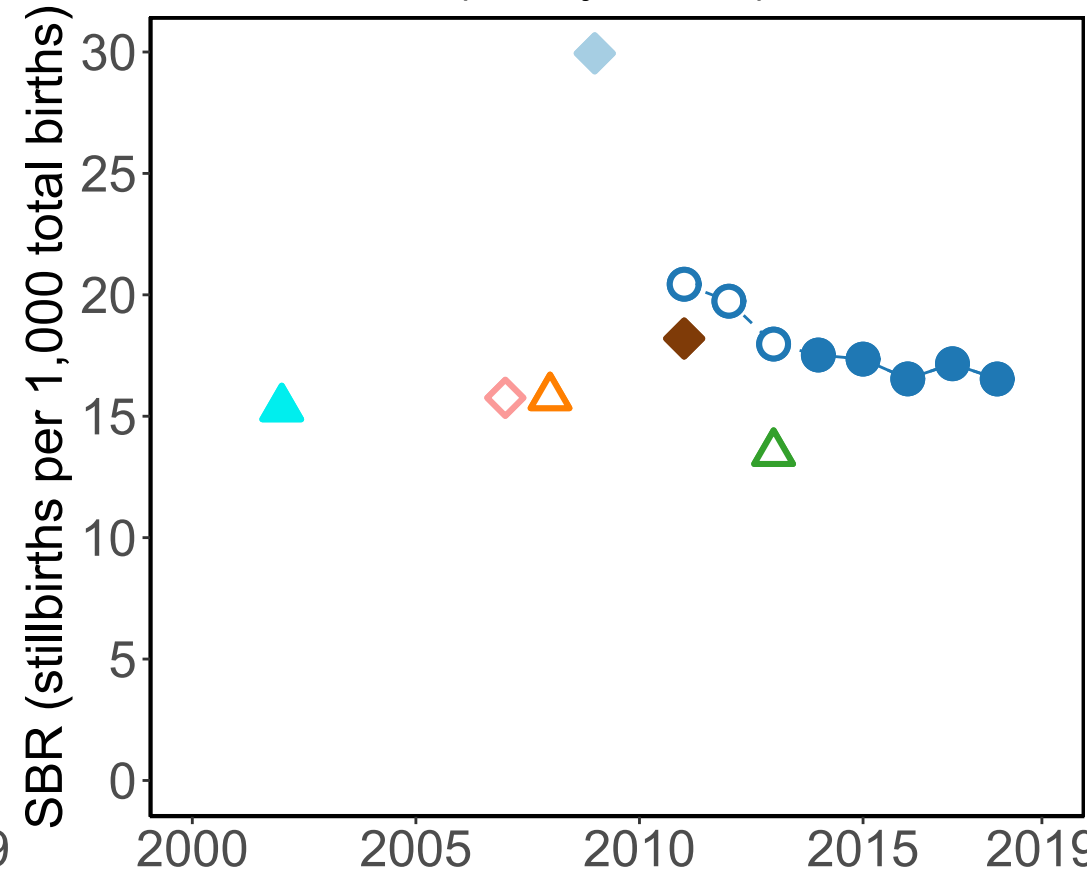

Data Included in the Model

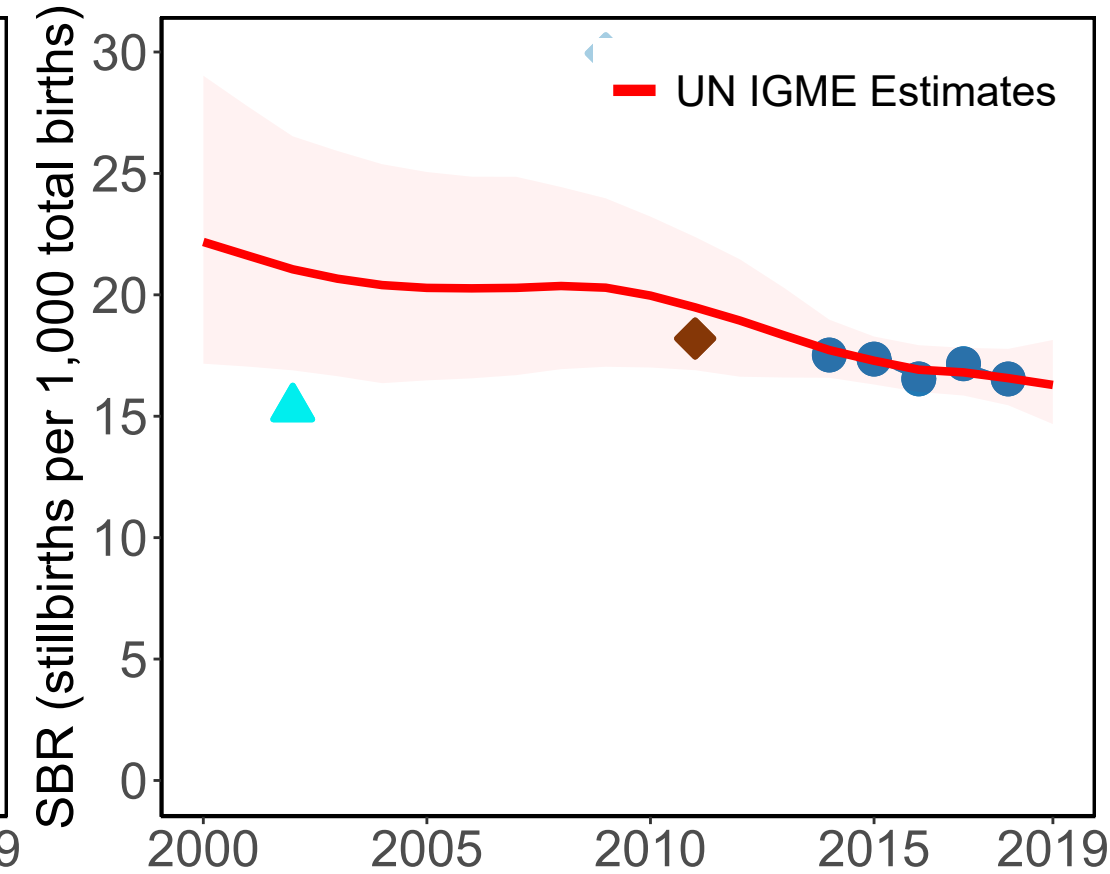

Source Types

- HMIS
- △ Survey
- ◇ Population study

Data Sources

- HMIS-DHIS2 (28wks)
- △ Demographic and Health Survey 2015-16 (DHS) (RC) (28wks)
- △ Demographic and Health Survey 2010 (DHS) (RC) (28wks)
- △ Demographic and Health Survey 2004 (DHS) (RC) (28wks)
- ◇ Ellard 2016 (not defined)
- ◇ Prost 2013 (28wks adj from 22wks)
- ◇ Prost 2013 (22wks)
- ◇ Colbourn 2013 (28wks)
- Waiswa (28wks)

# Malaysia

### Available Data

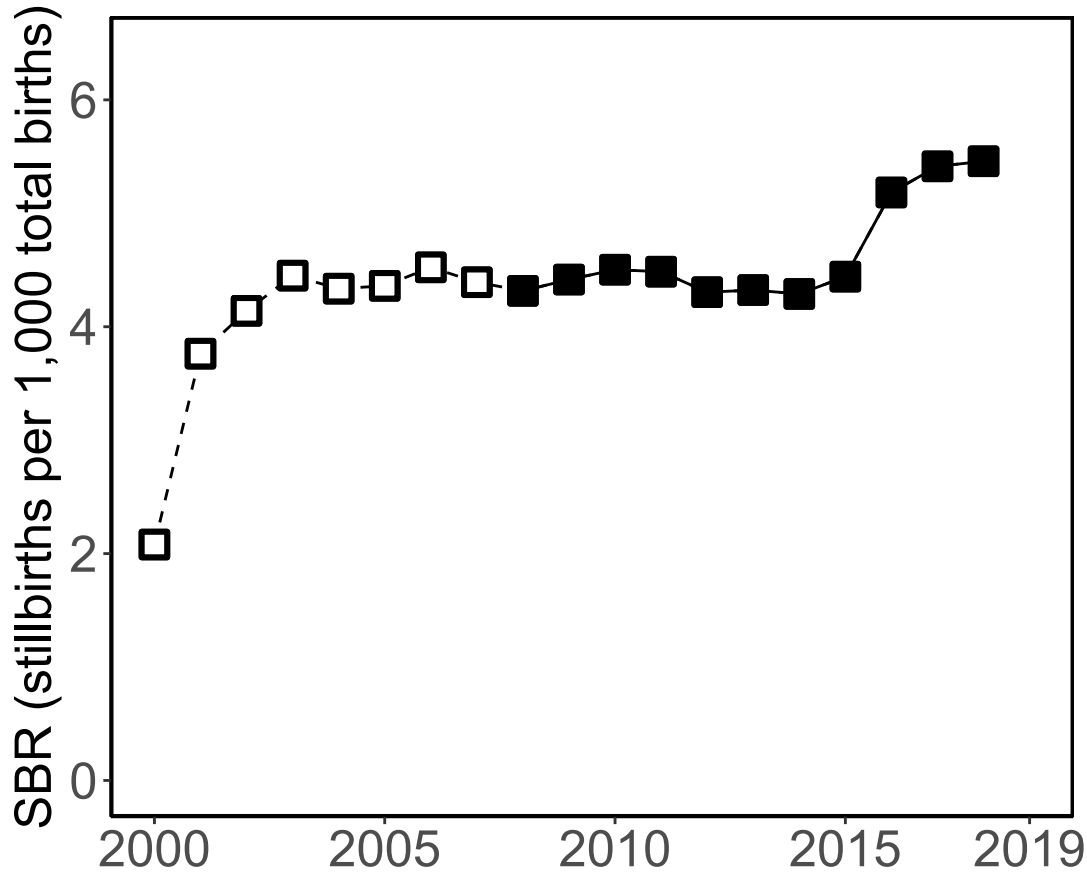

### '28+ Weeks of Gestation' Data (Incl. Adjusted Data)

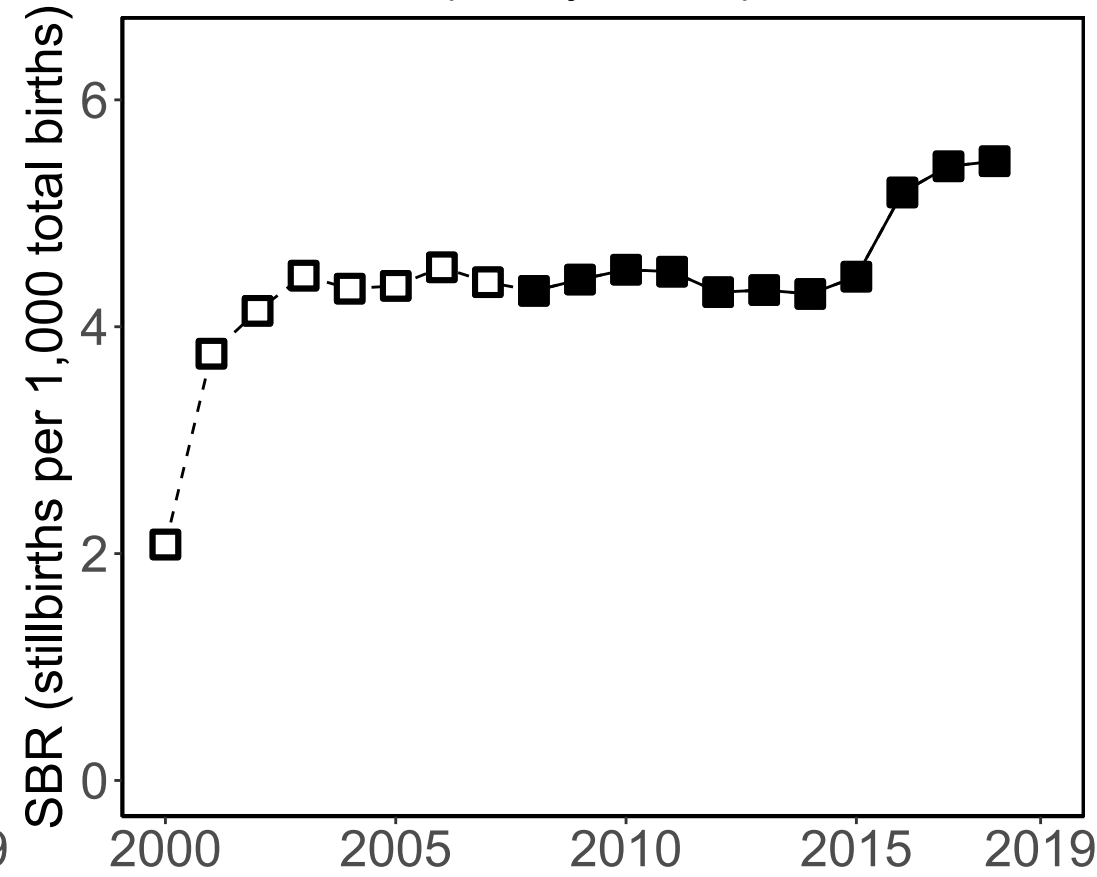

### Data Included in the Model

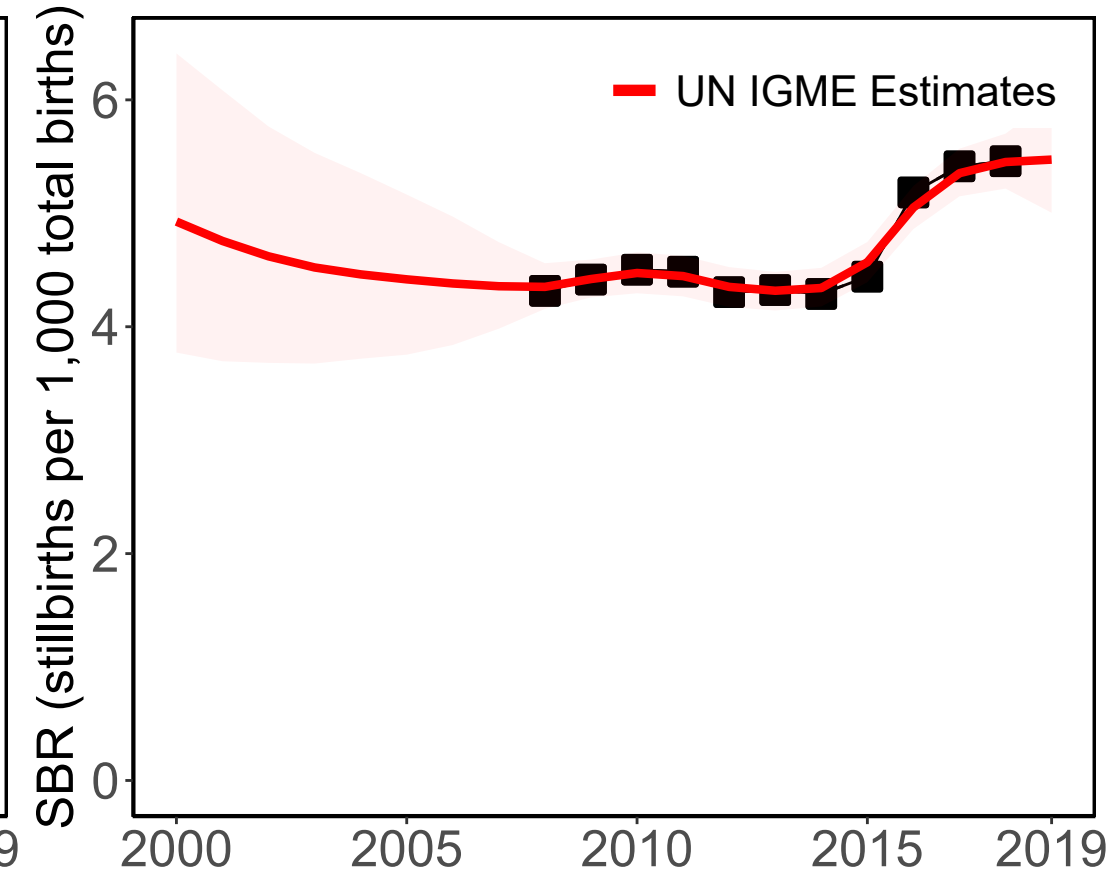

#### Source Types

□ Administrative

#### Data Sources

■ Vital Registration (28wks)

# Namibia

### Available Data

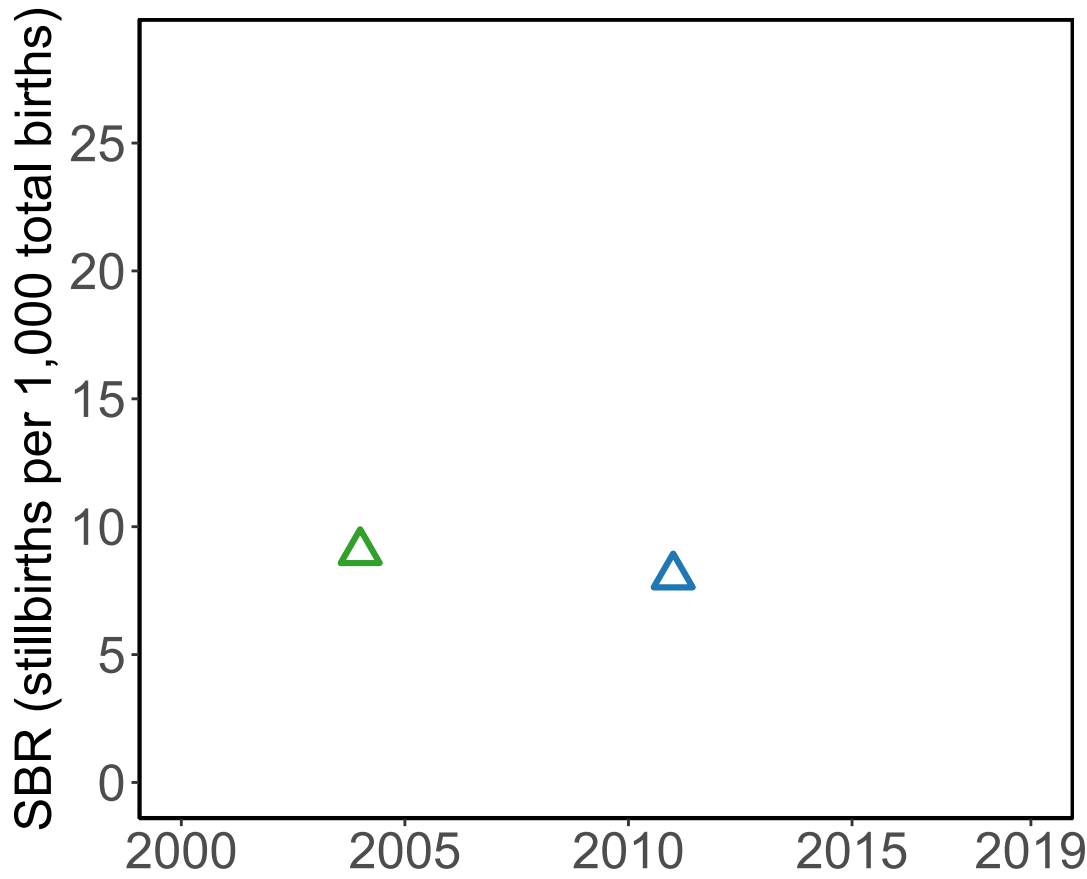

### '28+ Weeks of Gestation' Data (Incl. Adjusted Data)

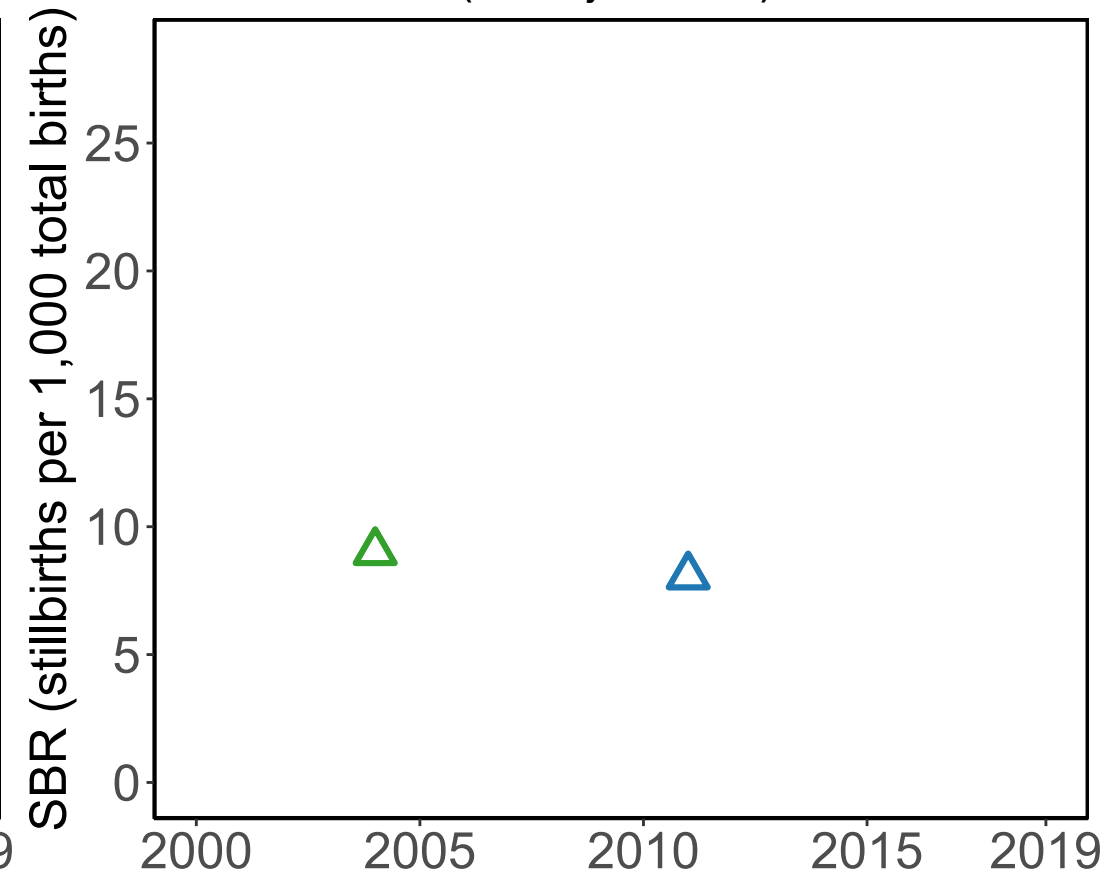

### Data Included in the Model

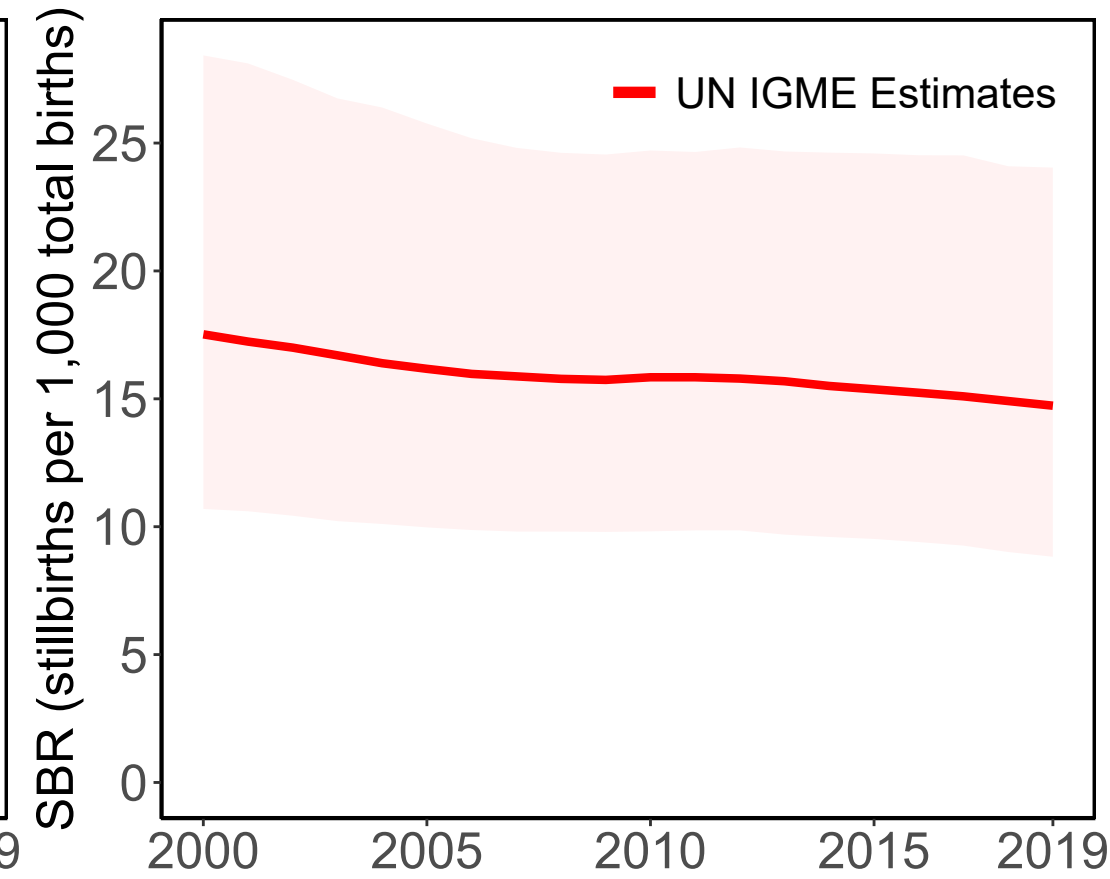

#### Source Types



Survey

#### Data Sources

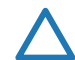

Demographic and Health Survey 2013 (DHS)  
(RC) (28wks)

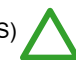

Demographic and Health Survey 2006-07 (DHS)  
(RC) (28wks)



# Niger

### Available Data

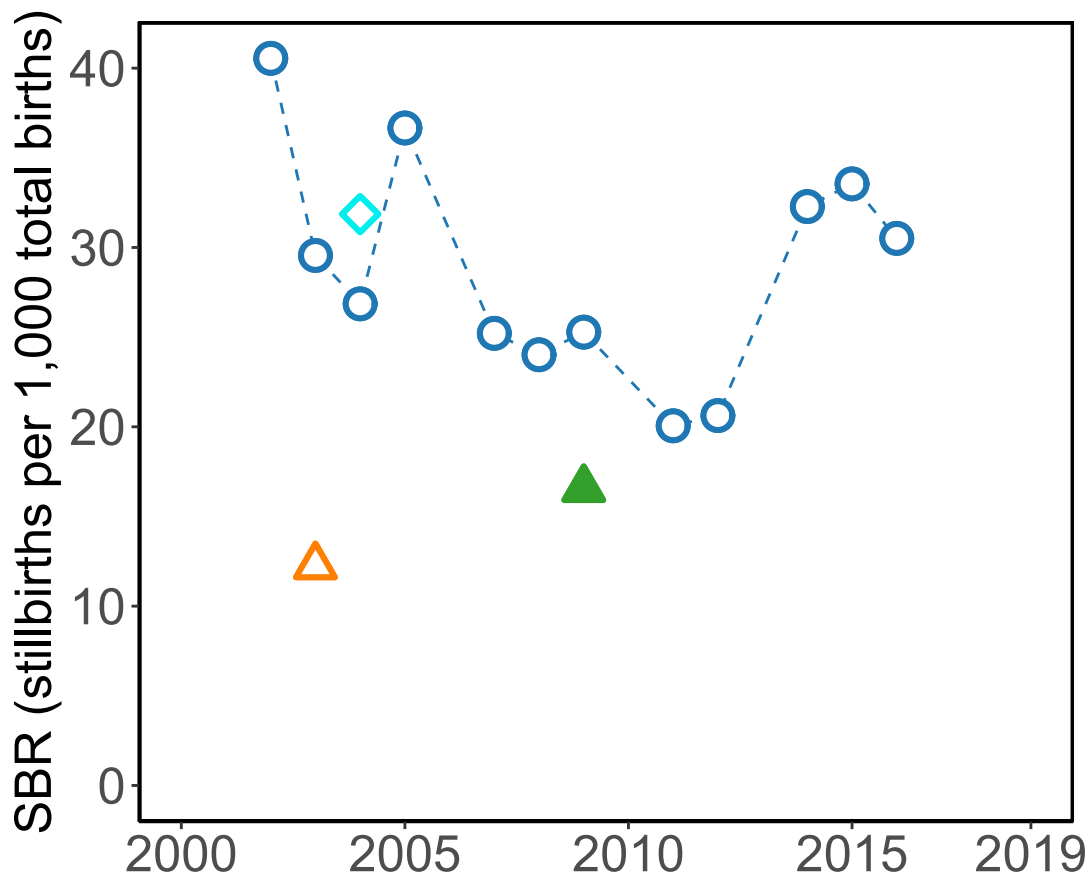

### '28+ Weeks of Gestation' Data (Incl. Adjusted Data)

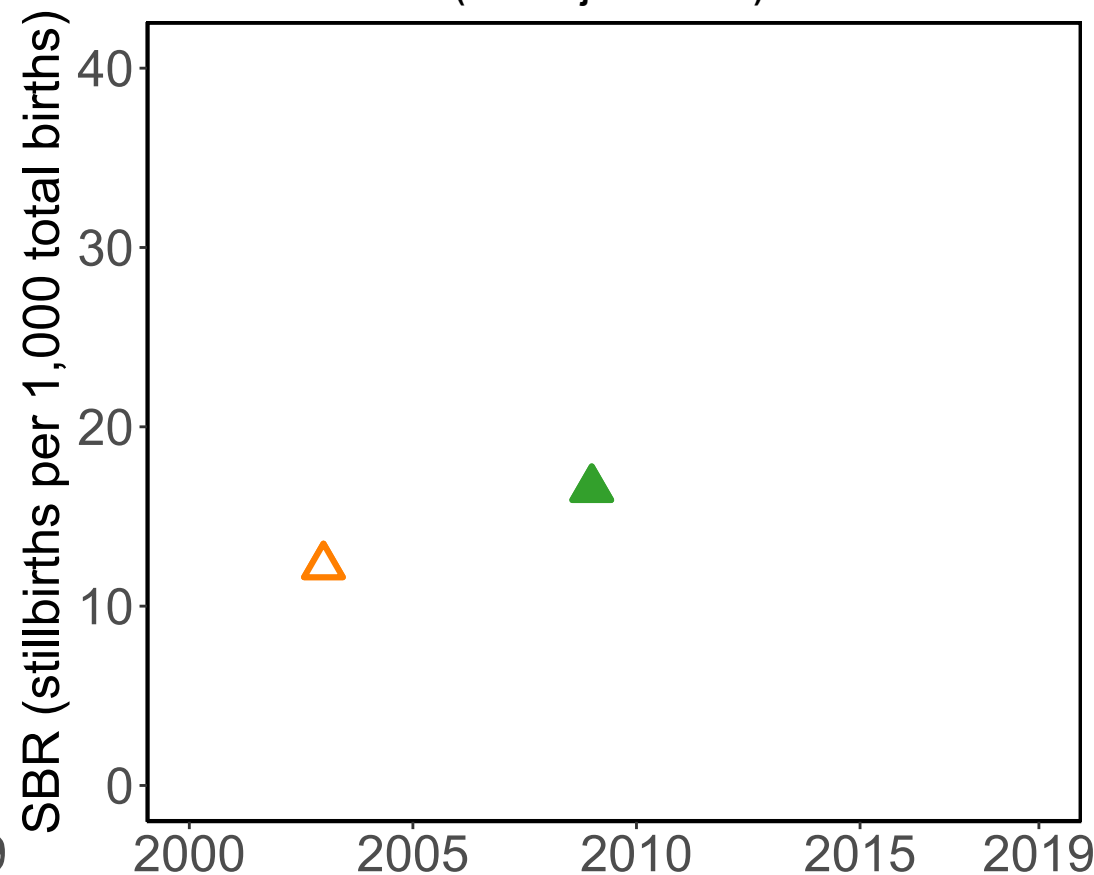

### Data Included in the Model

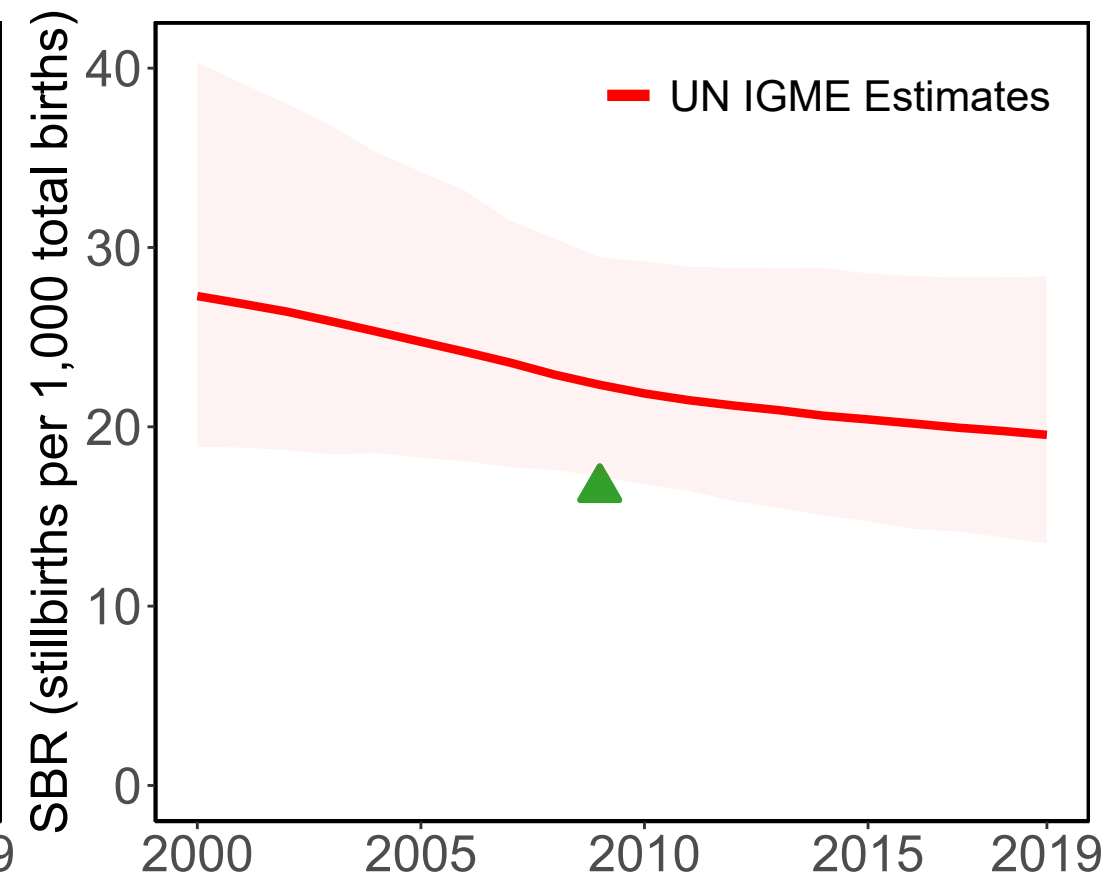

#### Source Types

- HMIS
- △ Survey
- ◇ Population study

#### Data Sources

- HMIS-DHIS2 (1000g)

▲ Enquête démographique et de santé et à indicateurs multiples 2012 (DHS) (RC) (28wks)

▲ Enquête démographique et de santé et à indicateurs multiples 2006 (DHS) (RC) (28wks)

◇ Zagre 2007 (24wks)

# Nigeria

### Available Data

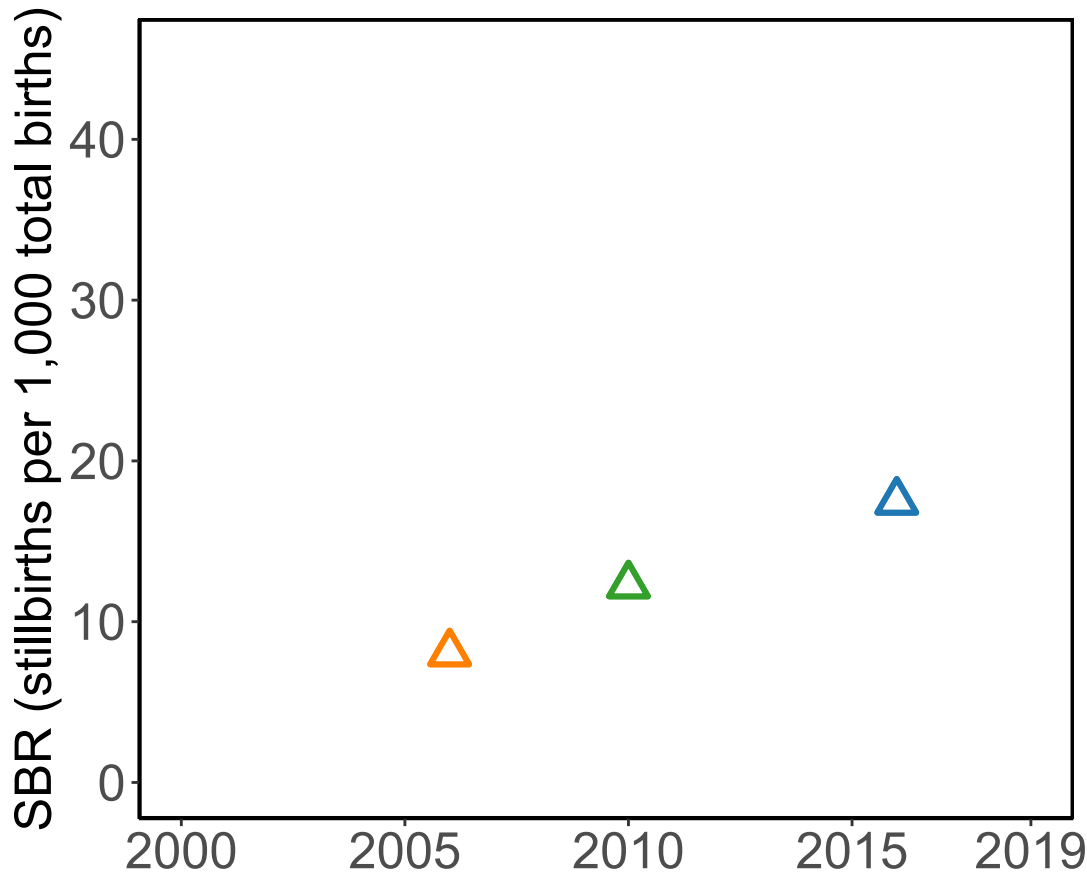

### '28+ Weeks of Gestation' Data (Incl. Adjusted Data)

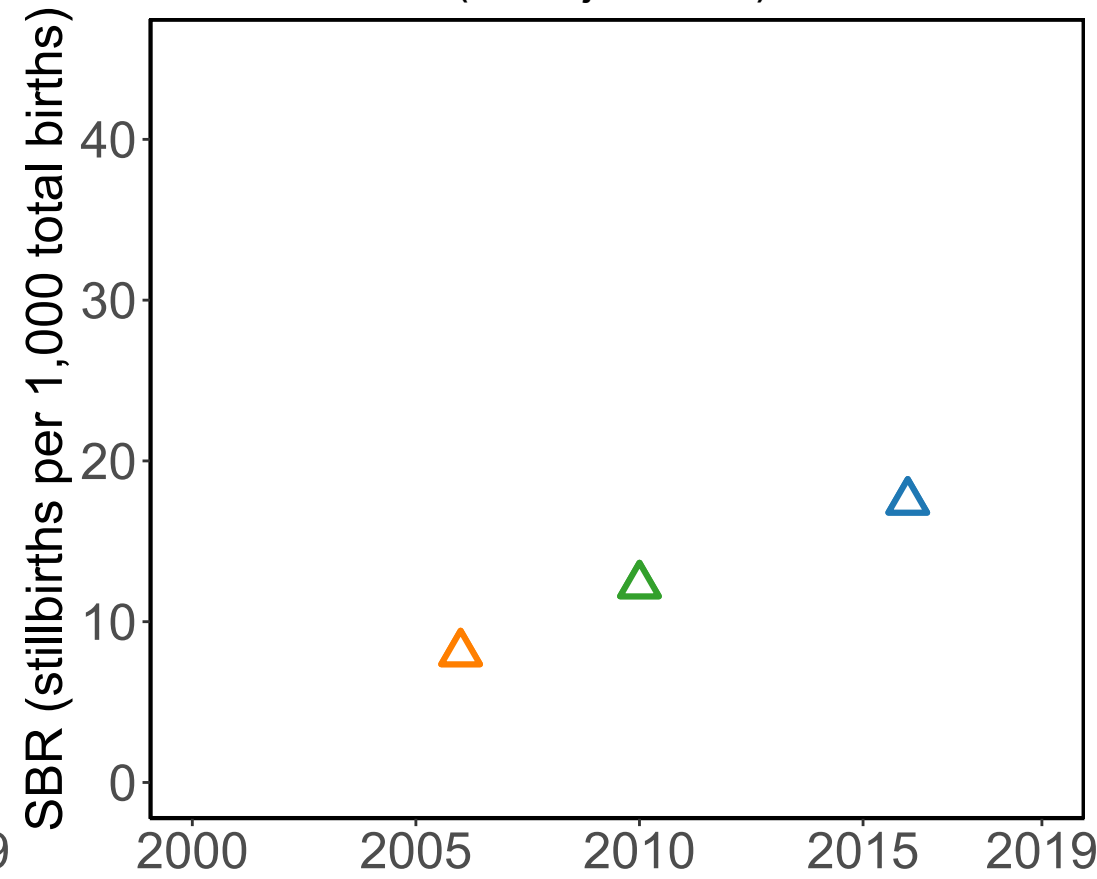

### Data Included in the Model

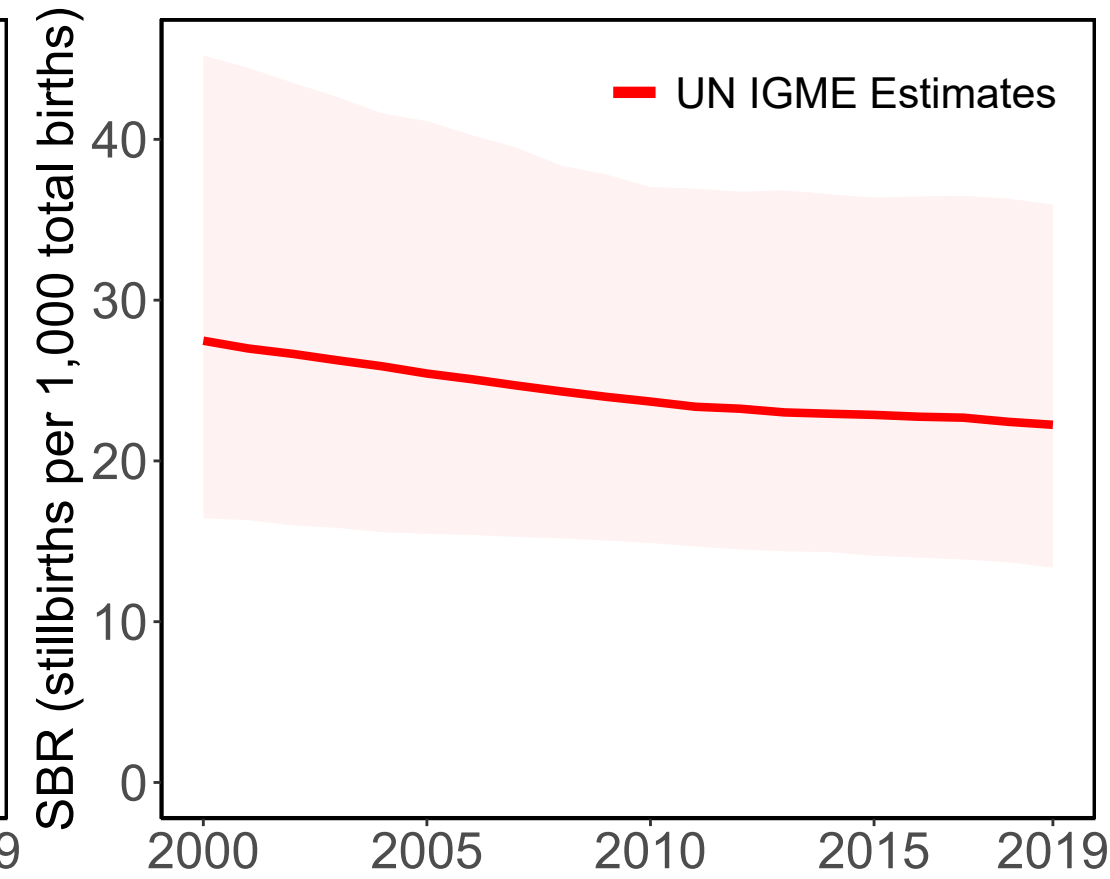

#### Source Types

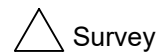

Survey

#### Data Sources

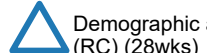

Demographic and Health Survey 2018 (DHS) (RC) (28wks)

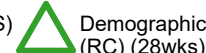

Demographic and Health Survey 2013 (DHS) (RC) (28wks)

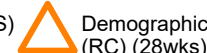

Demographic and Health Survey 2008 (DHS) (RC) (28wks)

UN IGME Estimates

# Nicaragua

### Available Data

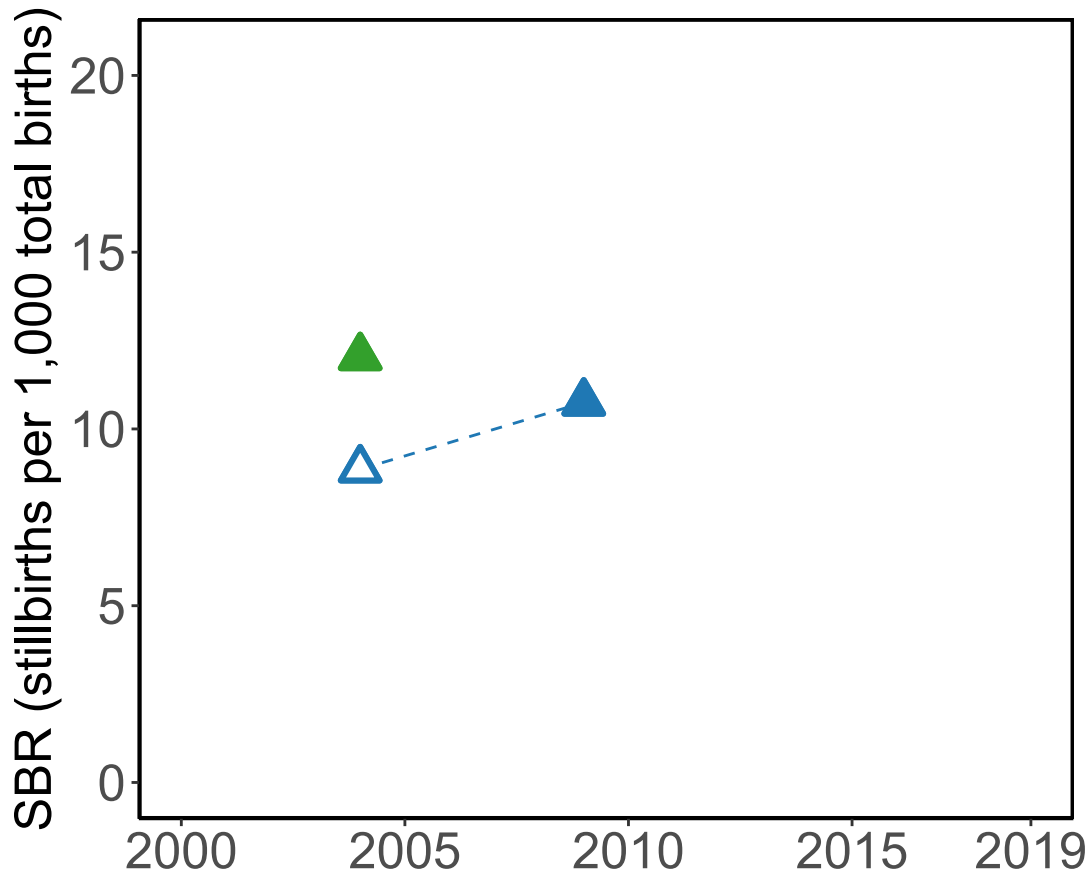

### '28+ Weeks of Gestation' Data (Incl. Adjusted Data)

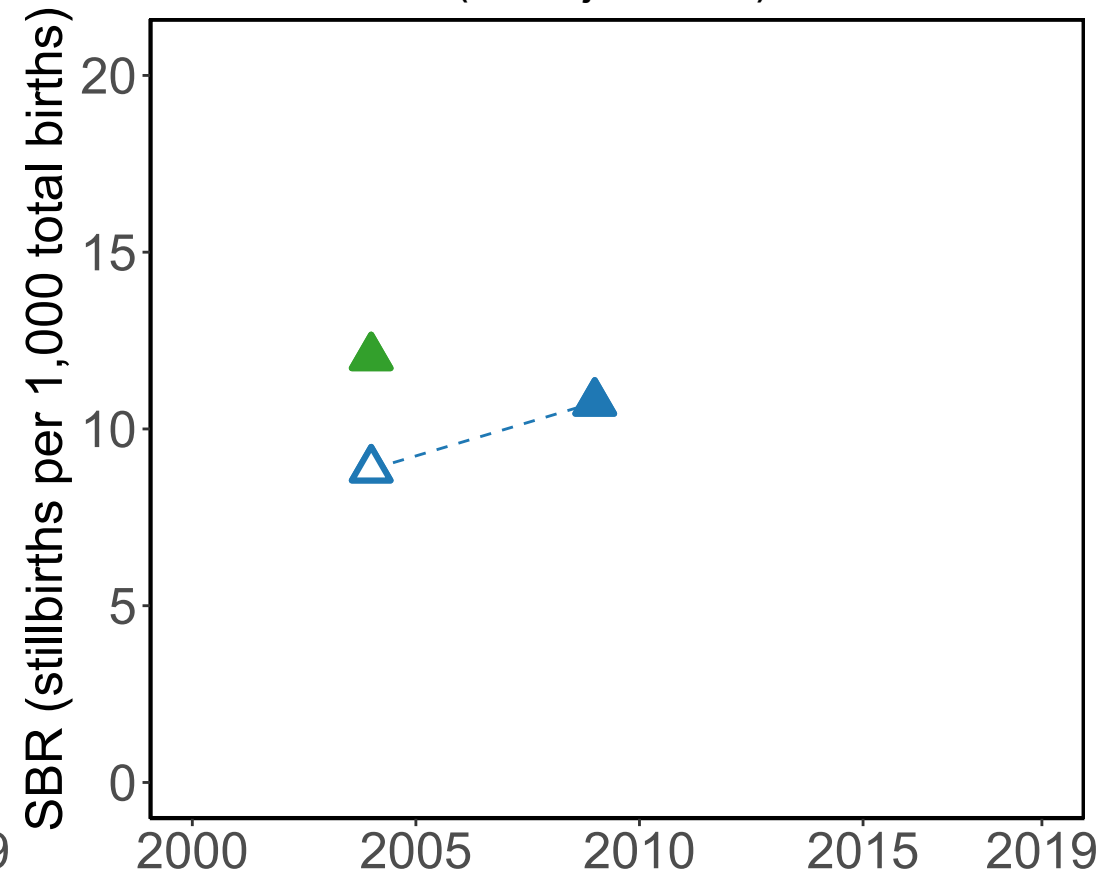

### Data Included in the Model

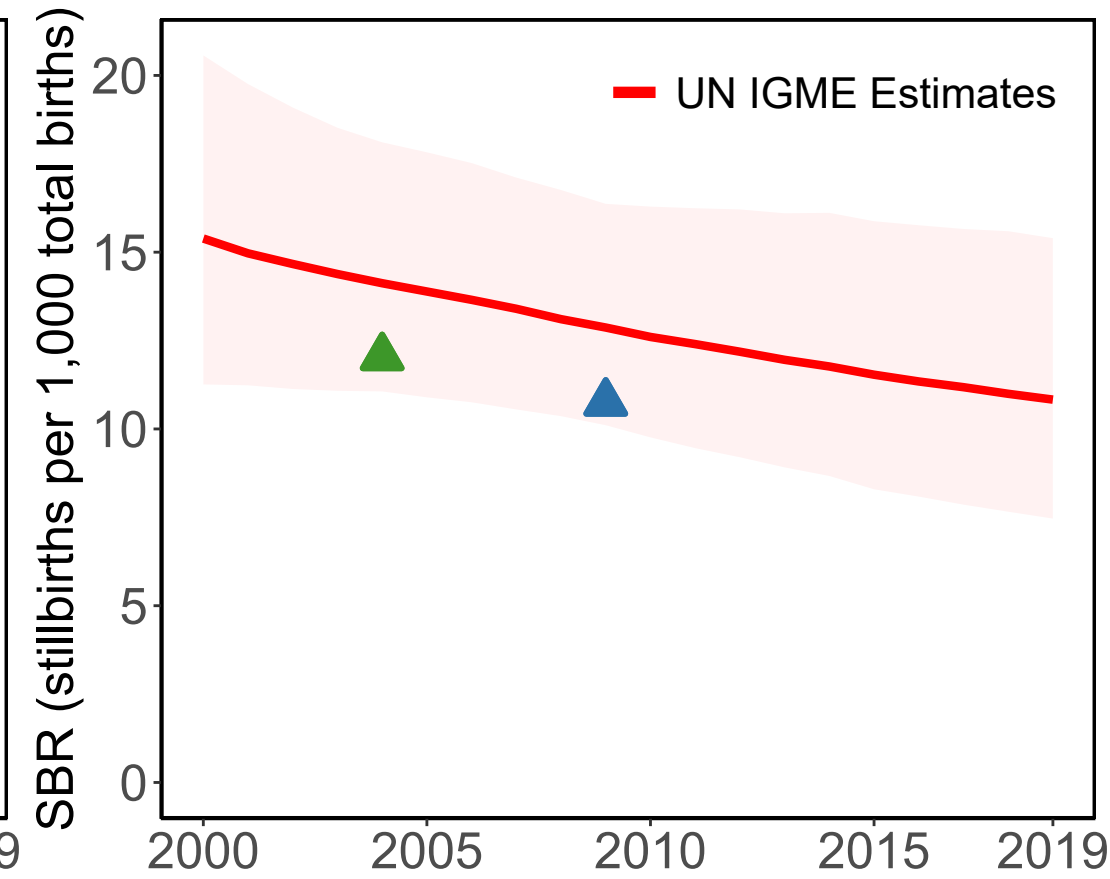

#### Source Types



Survey

#### Data Sources



Demographic and Health Survey 2011-12  
(Other) (PH) (28wks)

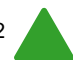

Encuesta Nicaragüense de Demografía y Salud  
2006 (RHS) (PH) (28wks)

# Niue

Available Data

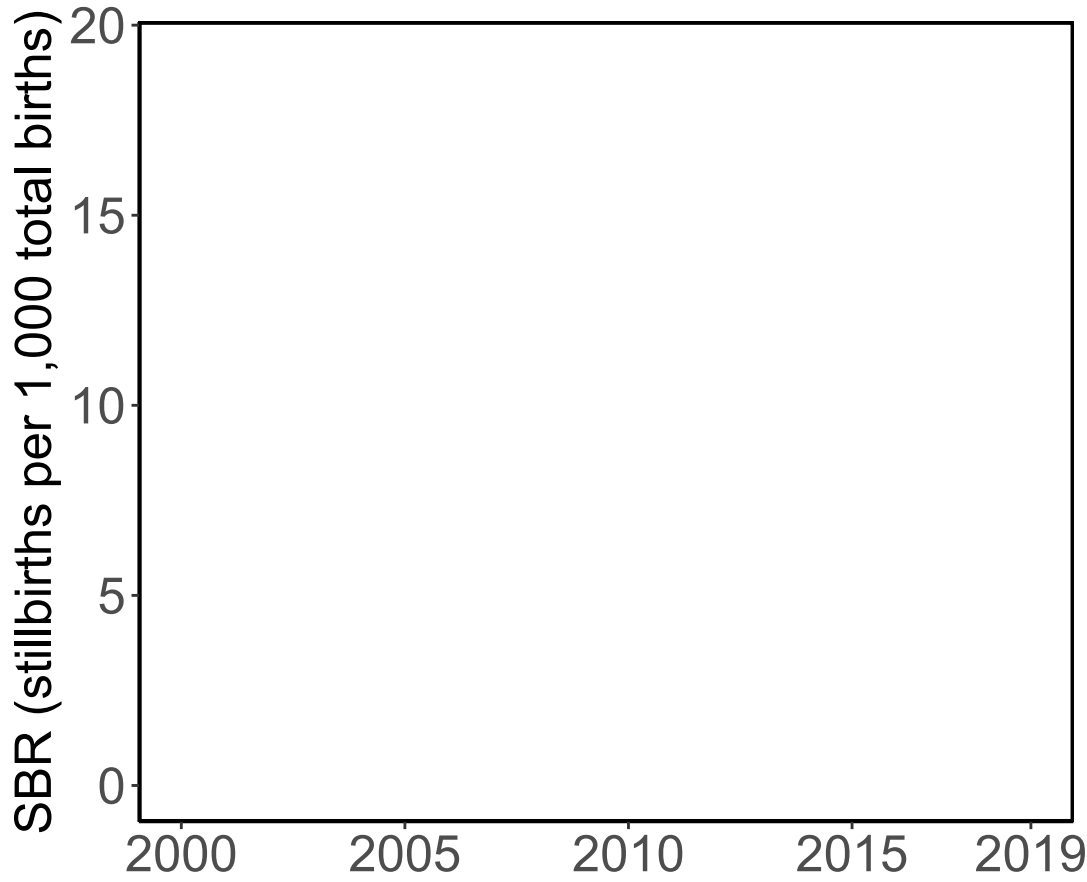

'28+ Weeks of Gestation' Data  
(Incl. Adjusted Data)

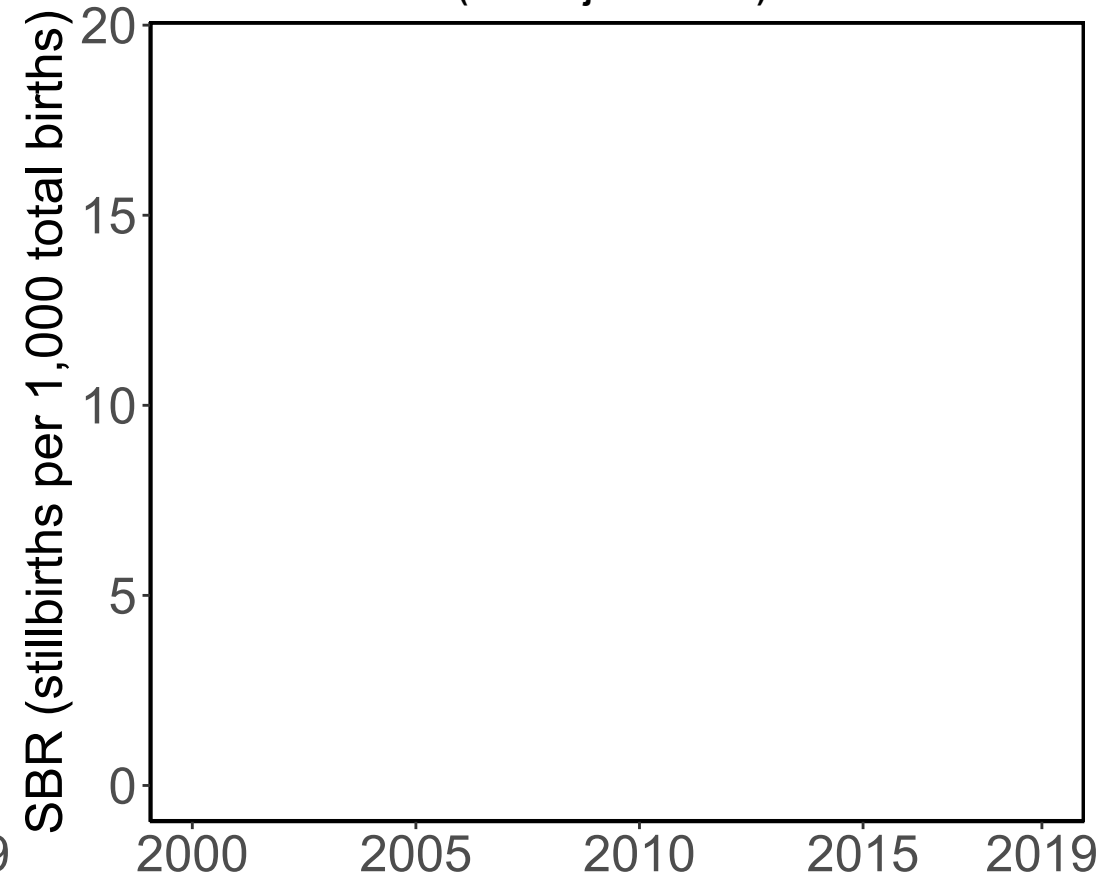

Data Included in the Model

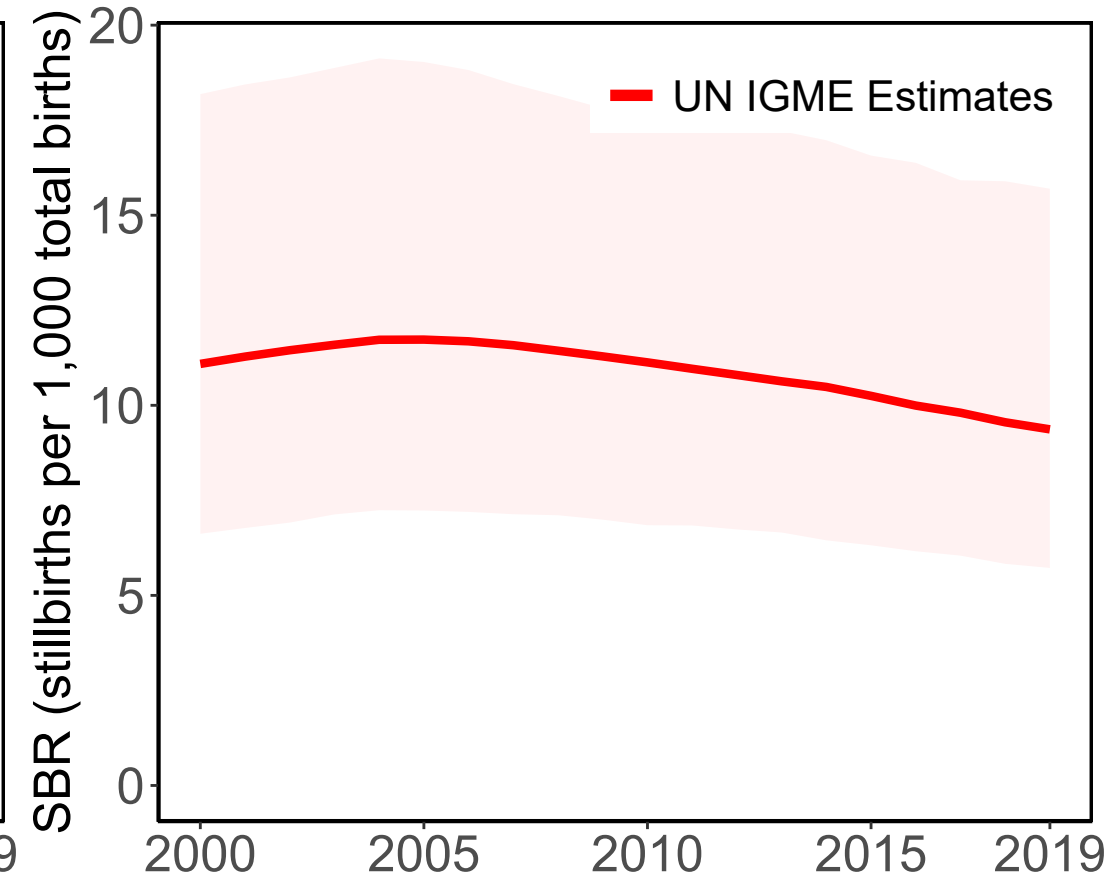

# Netherlands

### Available Data

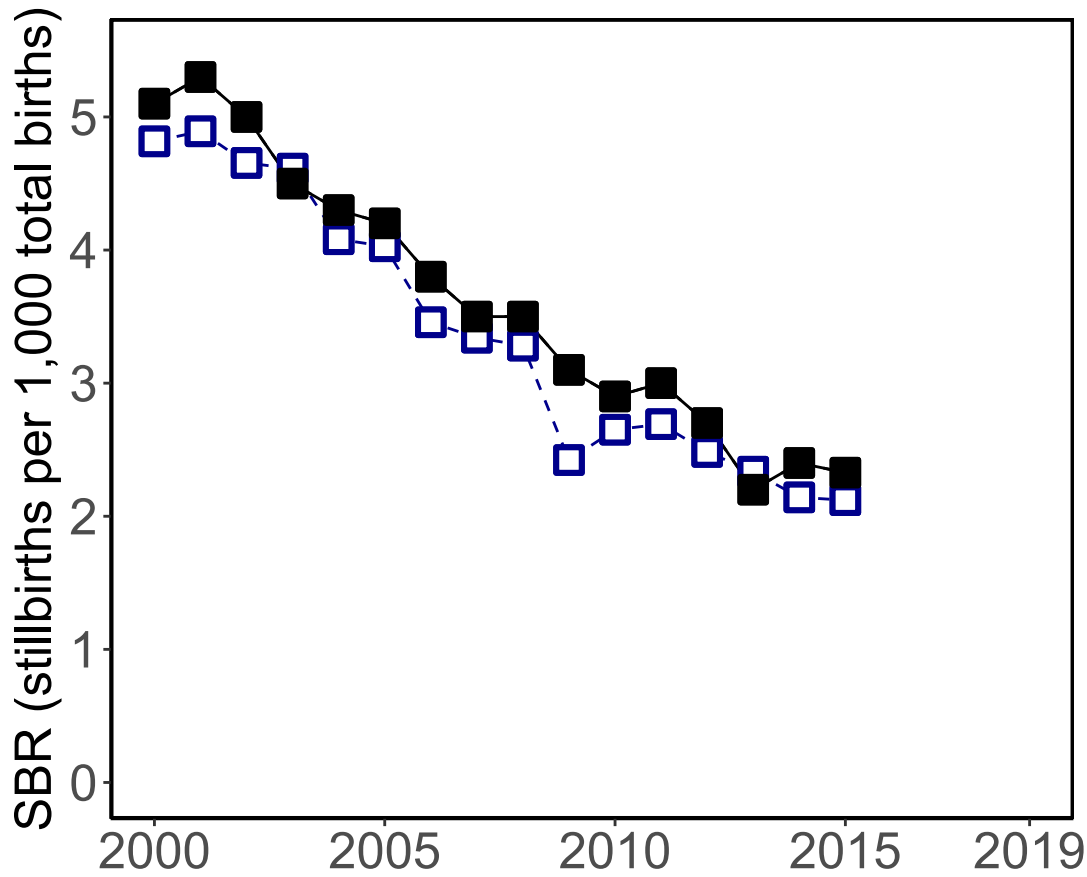

### '28+ Weeks of Gestation' Data (Incl. Adjusted Data)

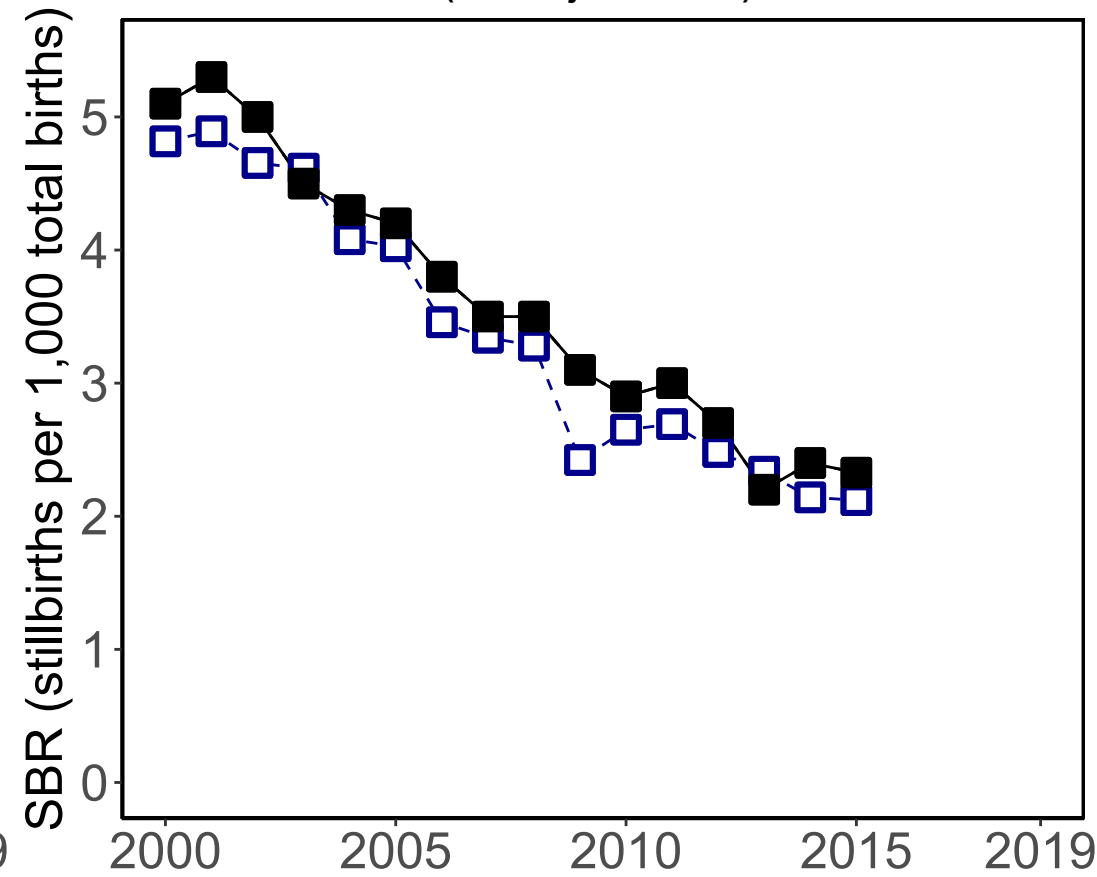

### Data Included in the Model

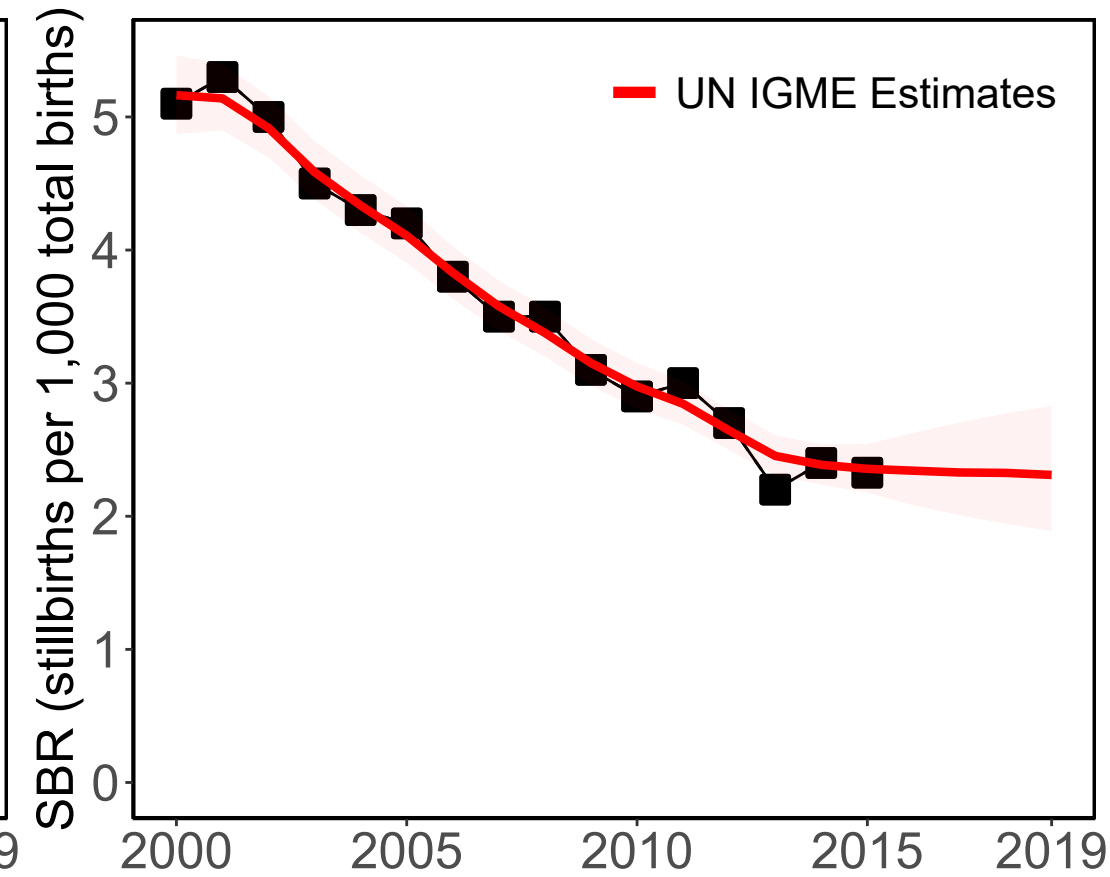

#### Source Types

Administrative

#### Data Sources

Birth or Death Registry (28wks)

Vital Registration (28wks)

# Norway

### Available Data

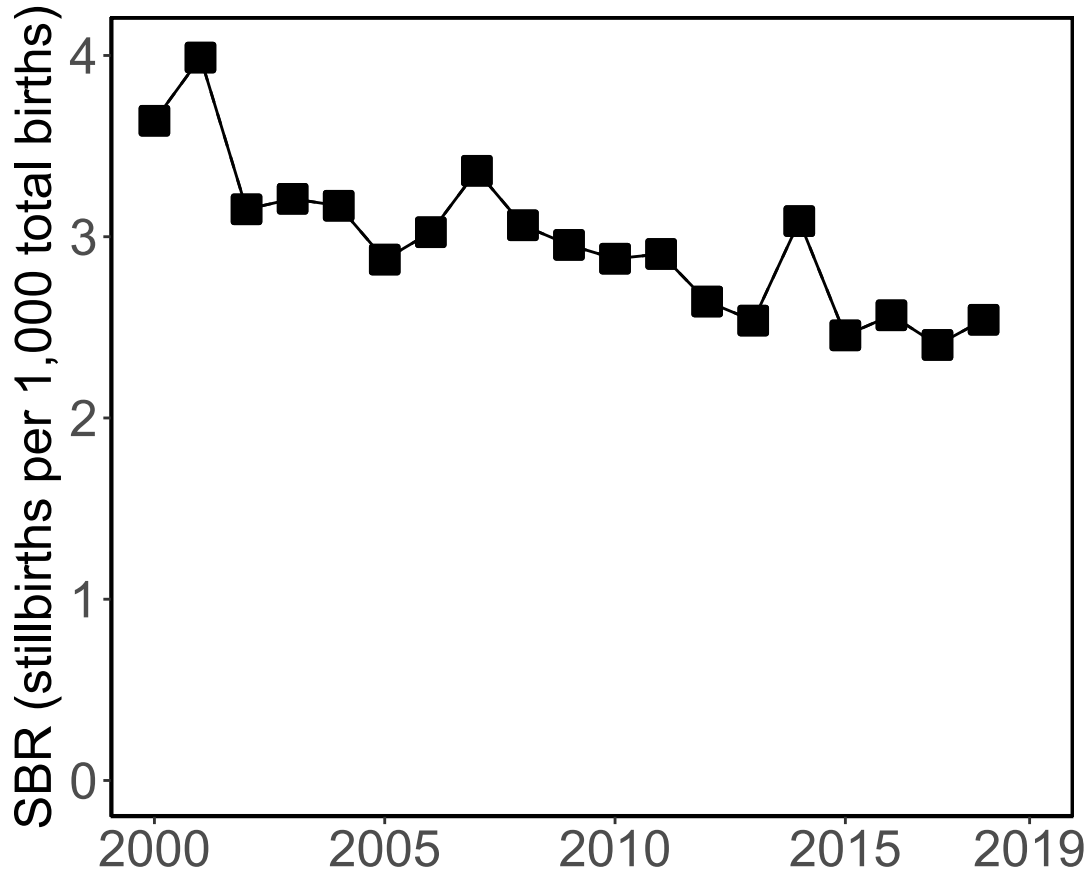

### '28+ Weeks of Gestation' Data (Incl. Adjusted Data)

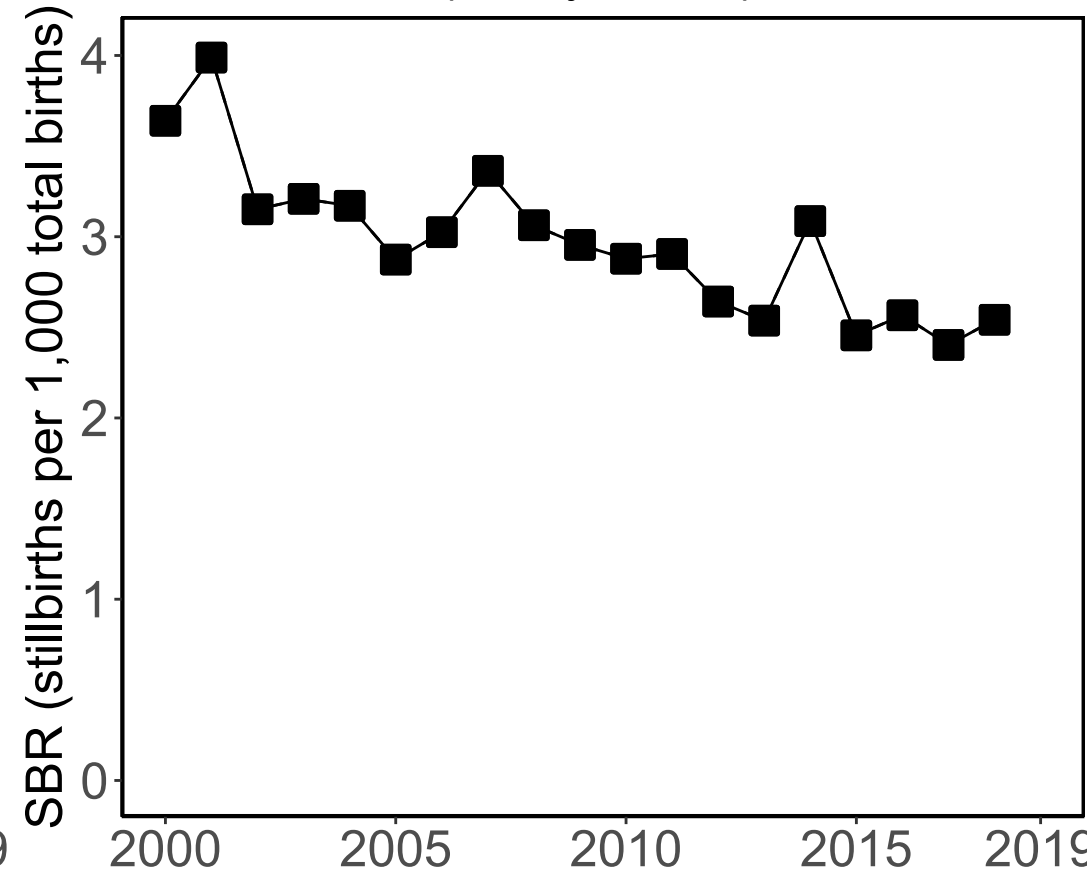

### Data Included in the Model

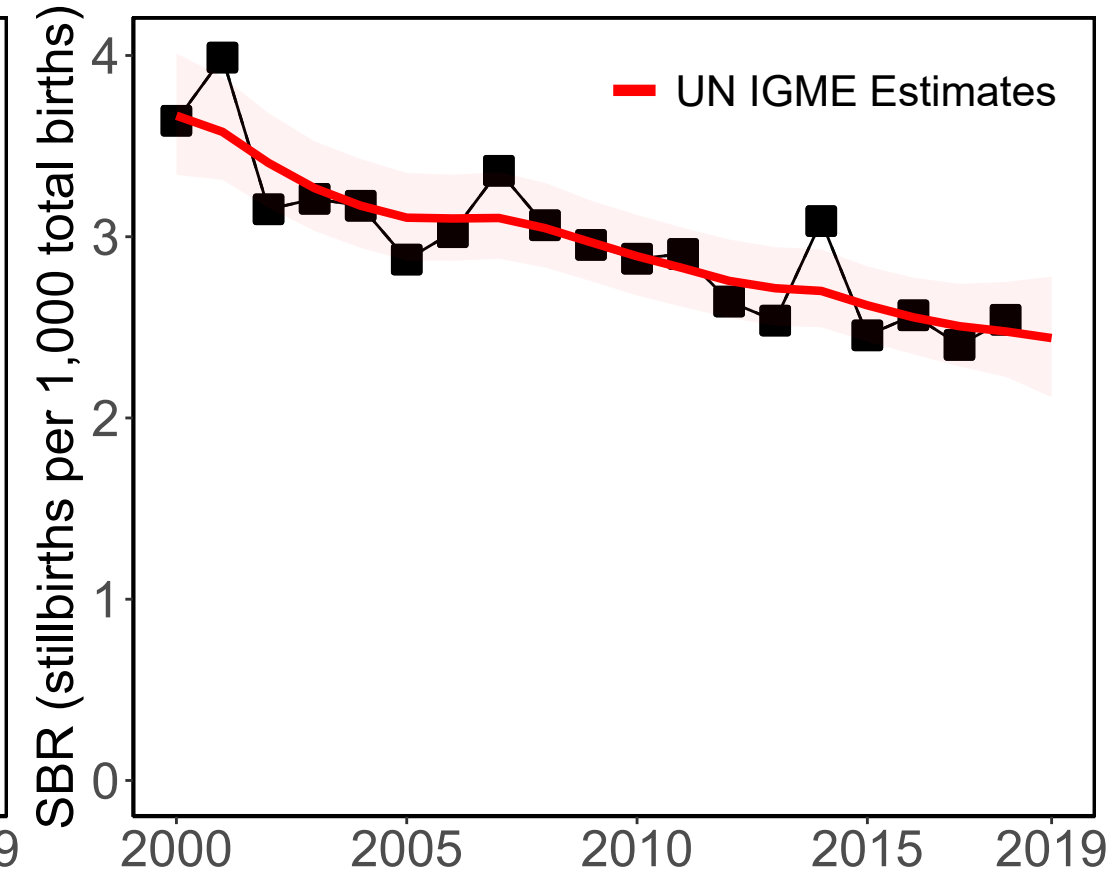

#### Source Types

□ Administrative

#### Data Sources

■ Vital Registration (28wks)

# Nepal

Available Data

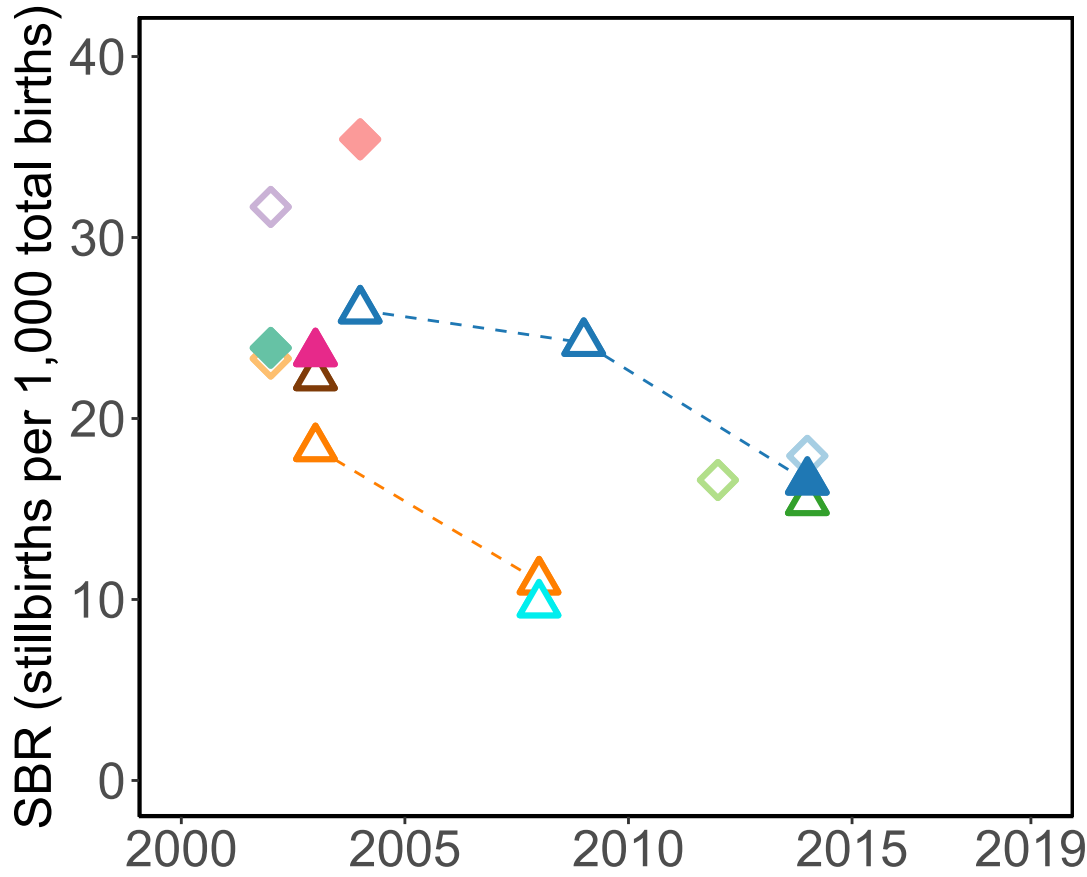

'28+ Weeks of Gestation' Data  
(Incl. Adjusted Data)

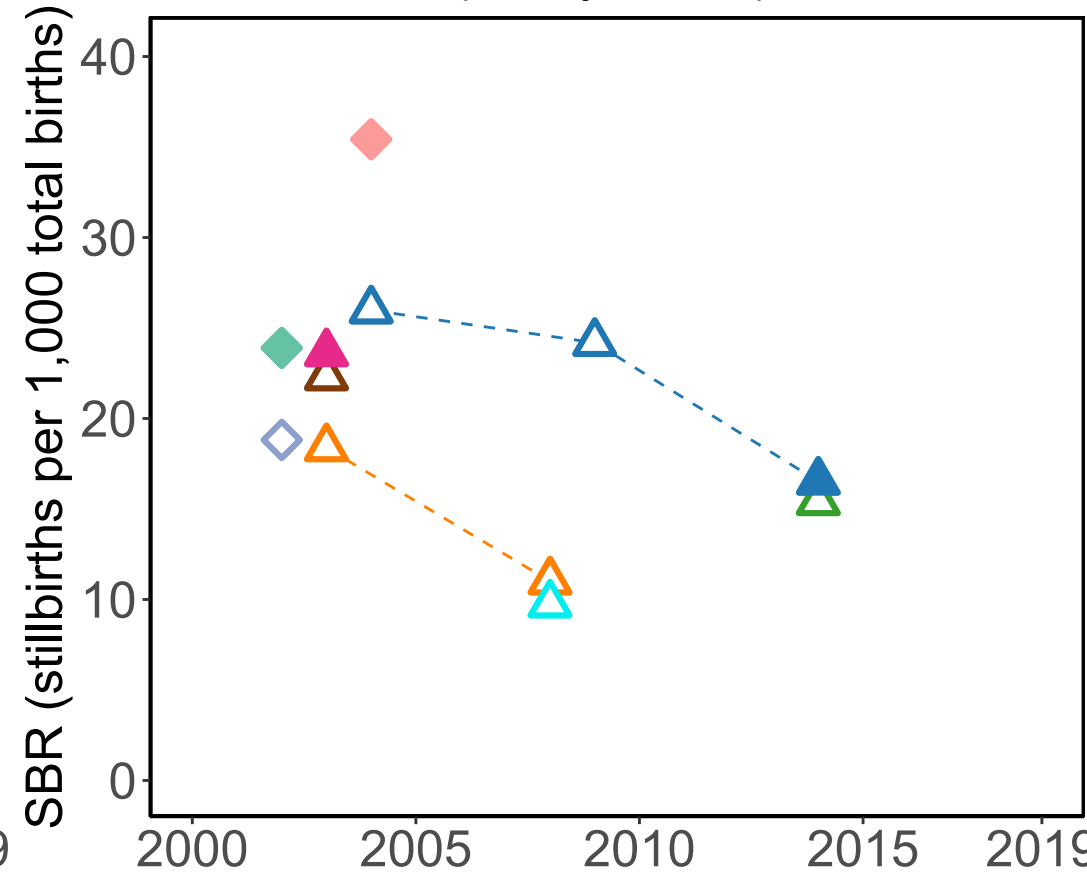

Data Included in the Model

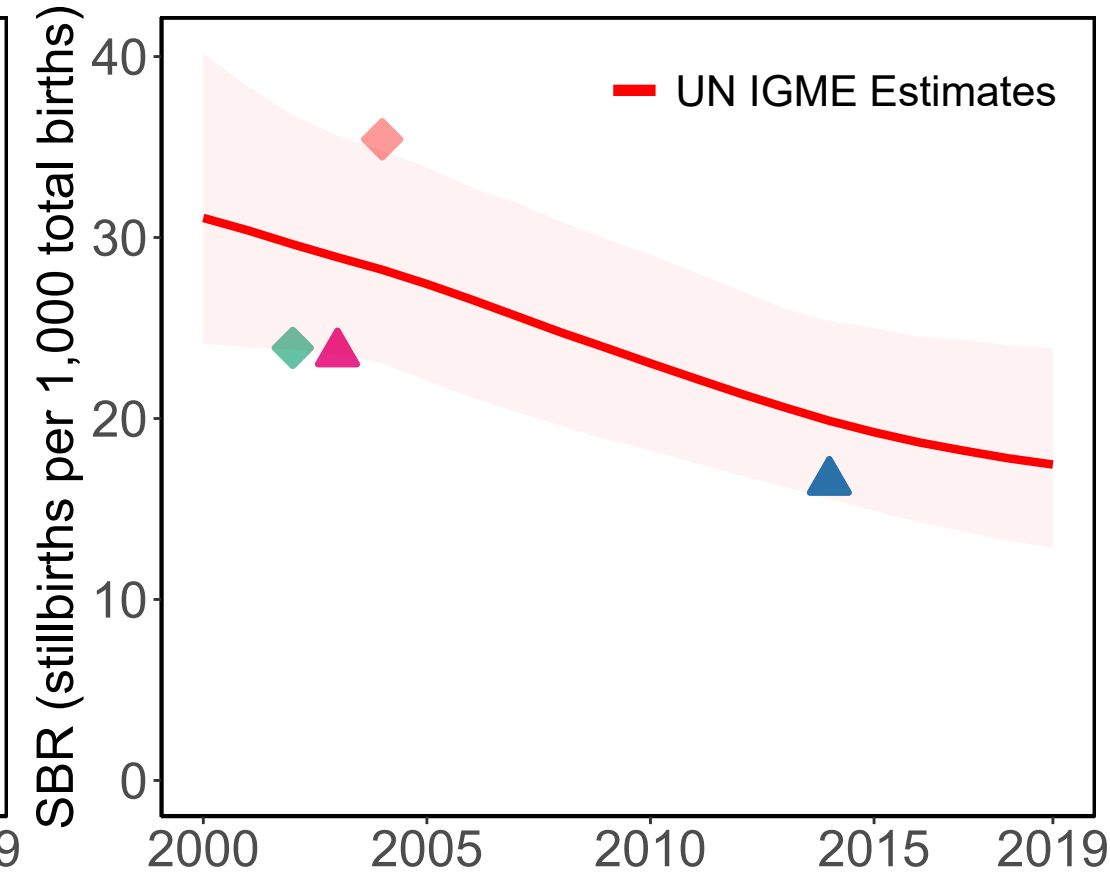

**Data Sources**

- ▲ Demographic and Health Survey 2016 (DHS) (PH) (28wks)
 ▲ Demographic and Health Survey 2006 (DHS) (PH) (28wks)
◆ Lee 2011 (28wks)
◇ Prost 2013 (28wks adj from 22wks)
- ▲ Demographic and Health Survey 2016 (DHS) (RC) (28wks)
 ▲ Demographic and Health Survey 2006 (DHS) (RC) (28wks)
◆ Manandhar 2004 (28wks)
- ▲ Demographic and Health Survey 2011 (DHS) (RC) (28wks)
 ◇ Kozuki 2017 (not defined)
◇ Osrin 2005 (24wks)
- ▲ Demographic and Health Survey 2011 (DHS) (PH) (28wks)
 ◇ Steinhoff 2017 (not defined)
◇ Prost 2013 (22wks)

**Source Types**

- ▲ Survey
- ◇ Population study

# Nauru

### Available Data

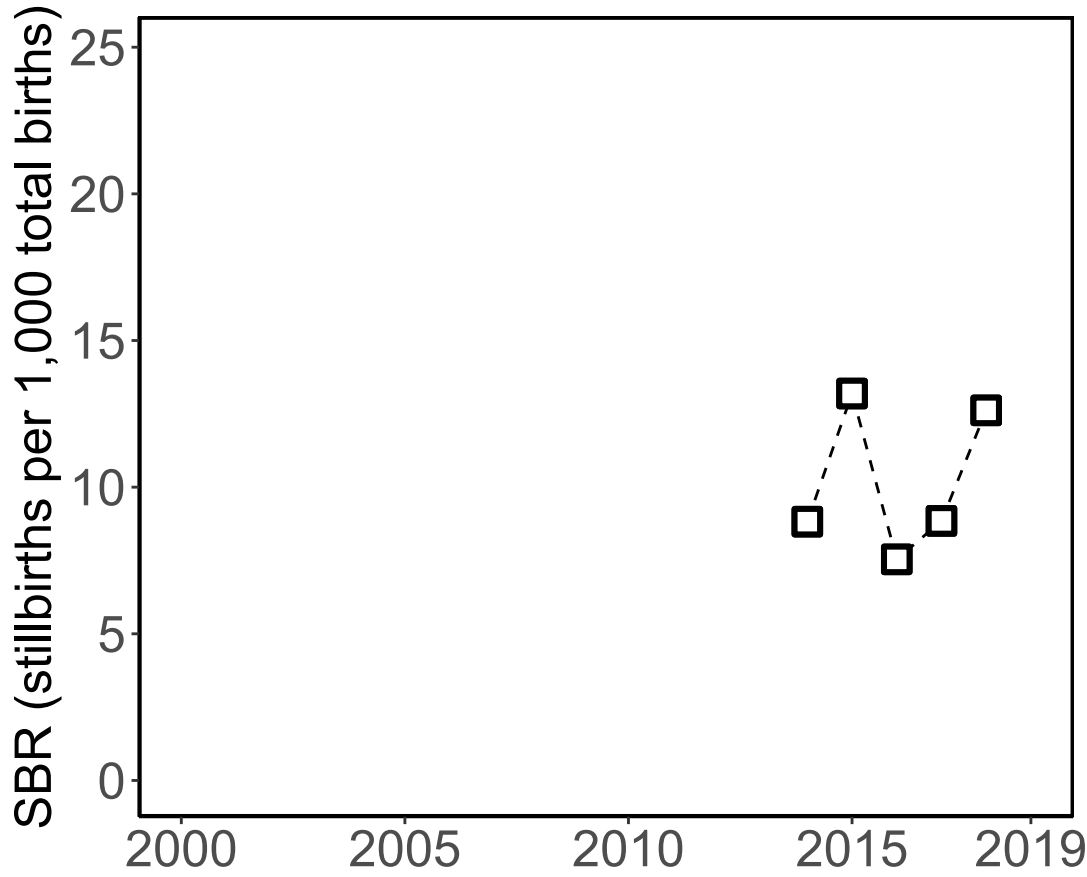

### '28+ Weeks of Gestation' Data (Incl. Adjusted Data)

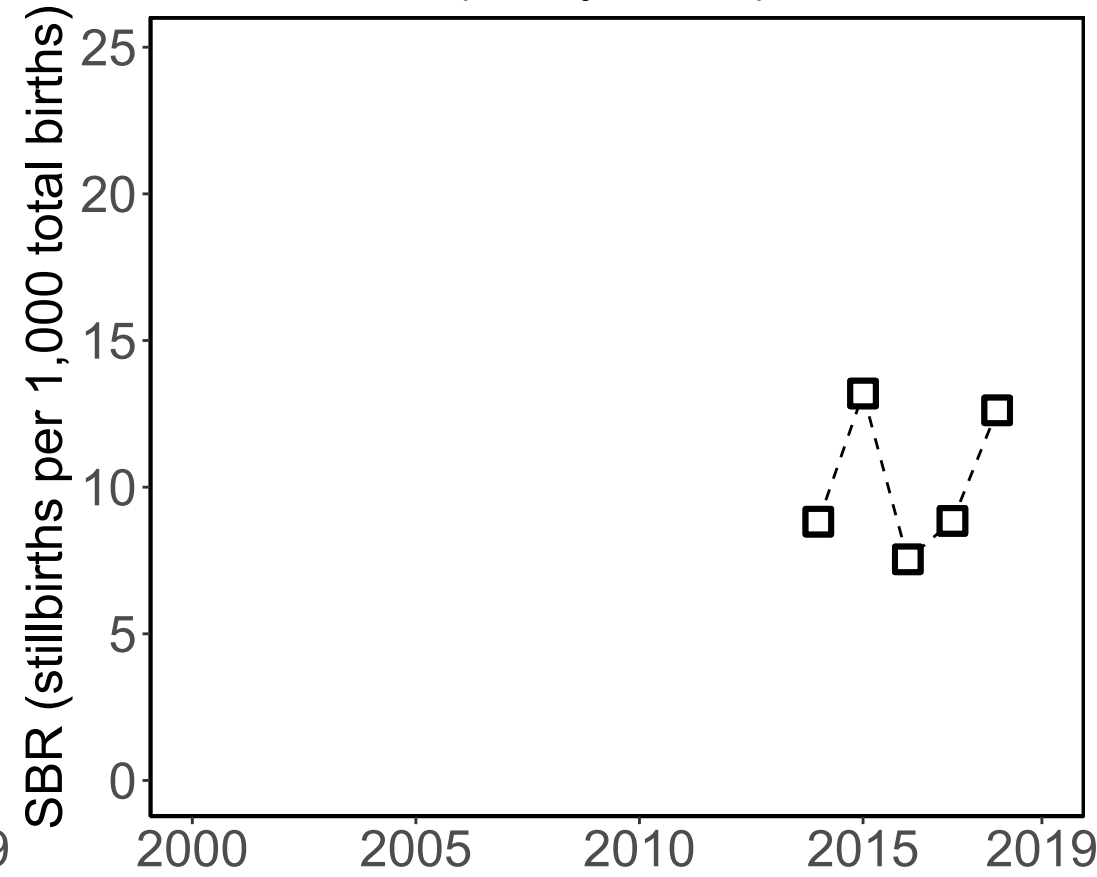

### Data Included in the Model

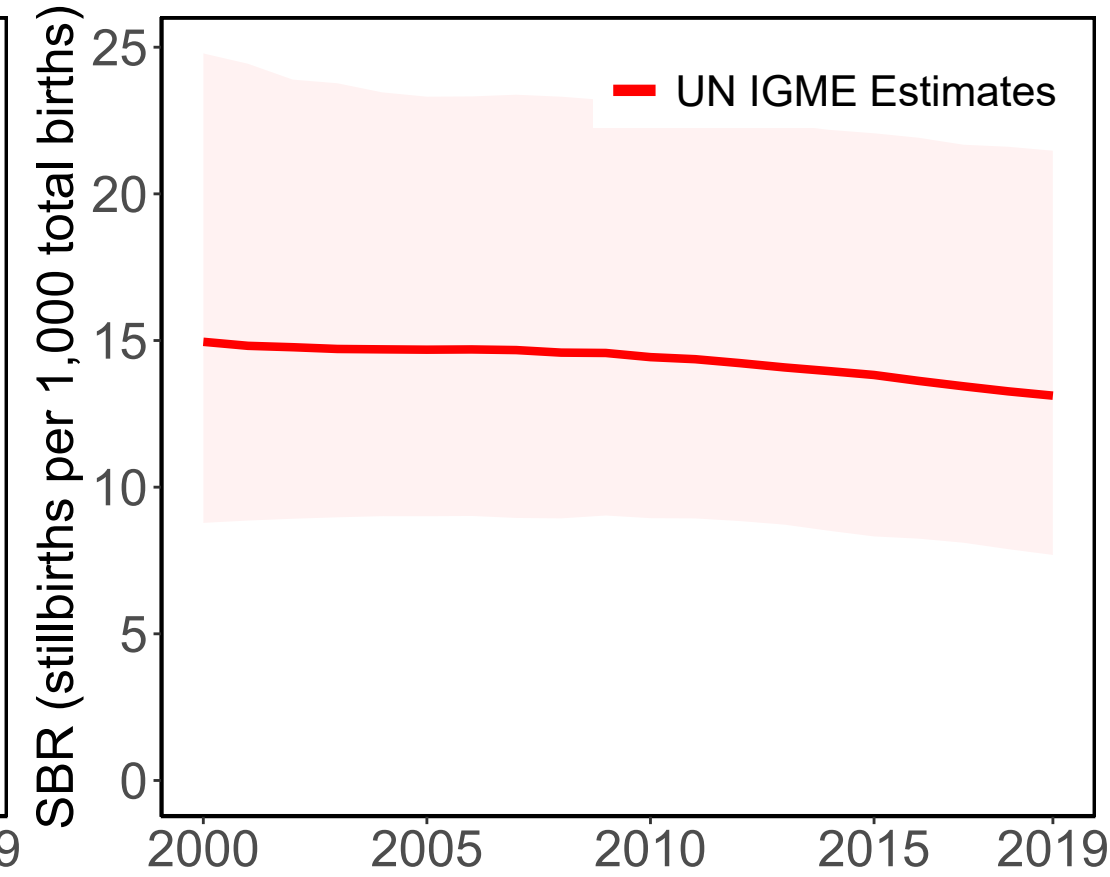

#### Source Types

Administrative

#### Data Sources

Birth or Death Registry (28wks)



# New Zealand

### Available Data

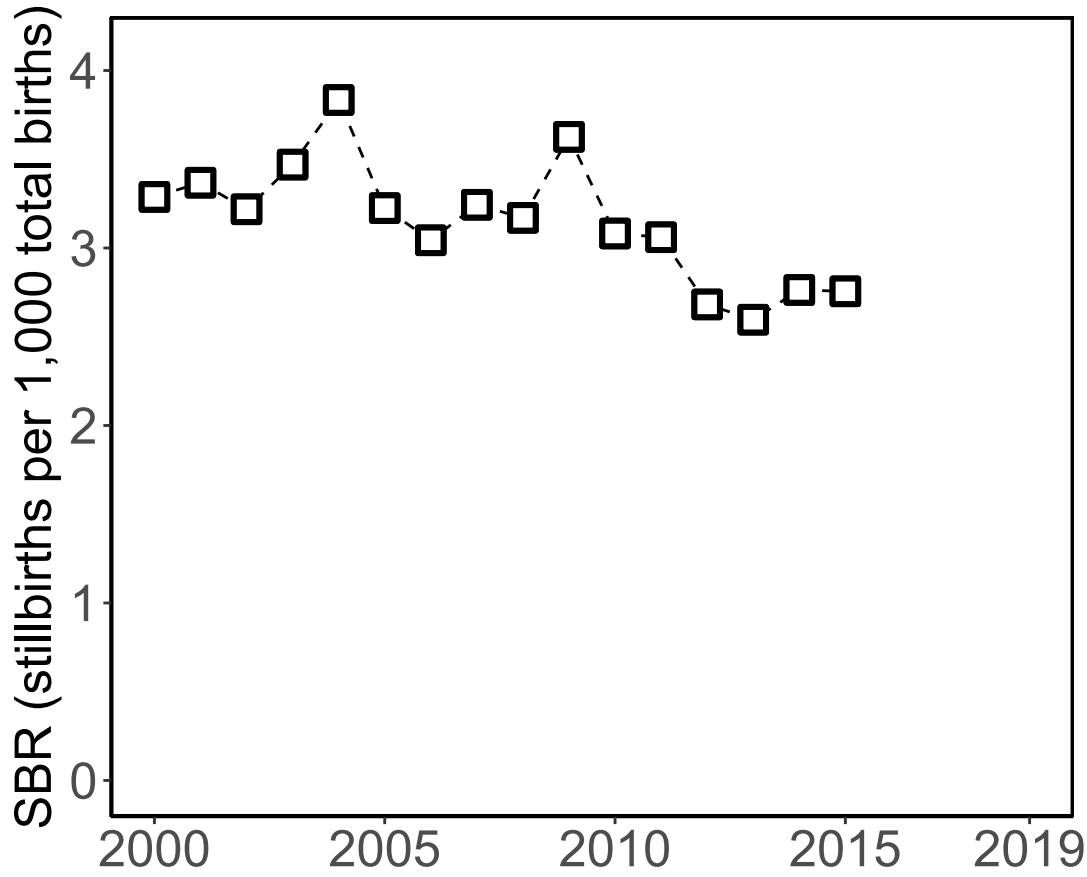

### '28+ Weeks of Gestation' Data (Incl. Adjusted Data)

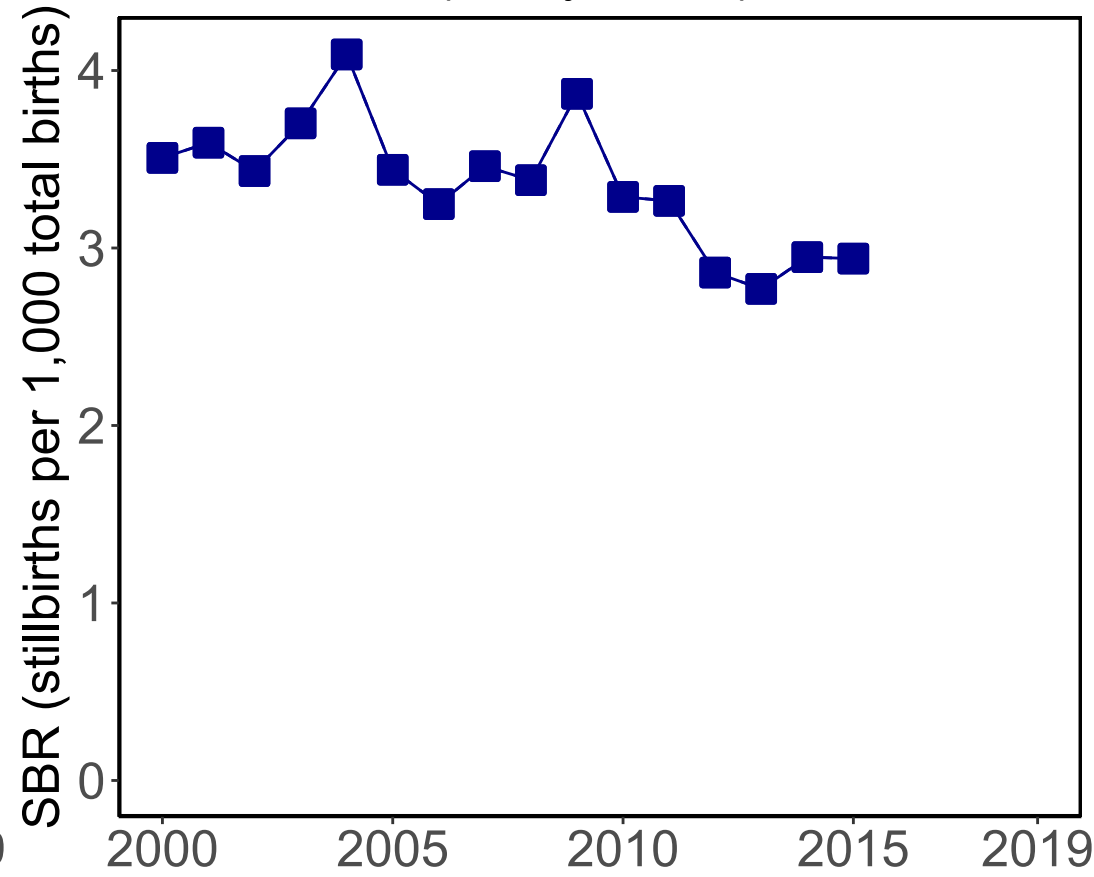

### Data Included in the Model

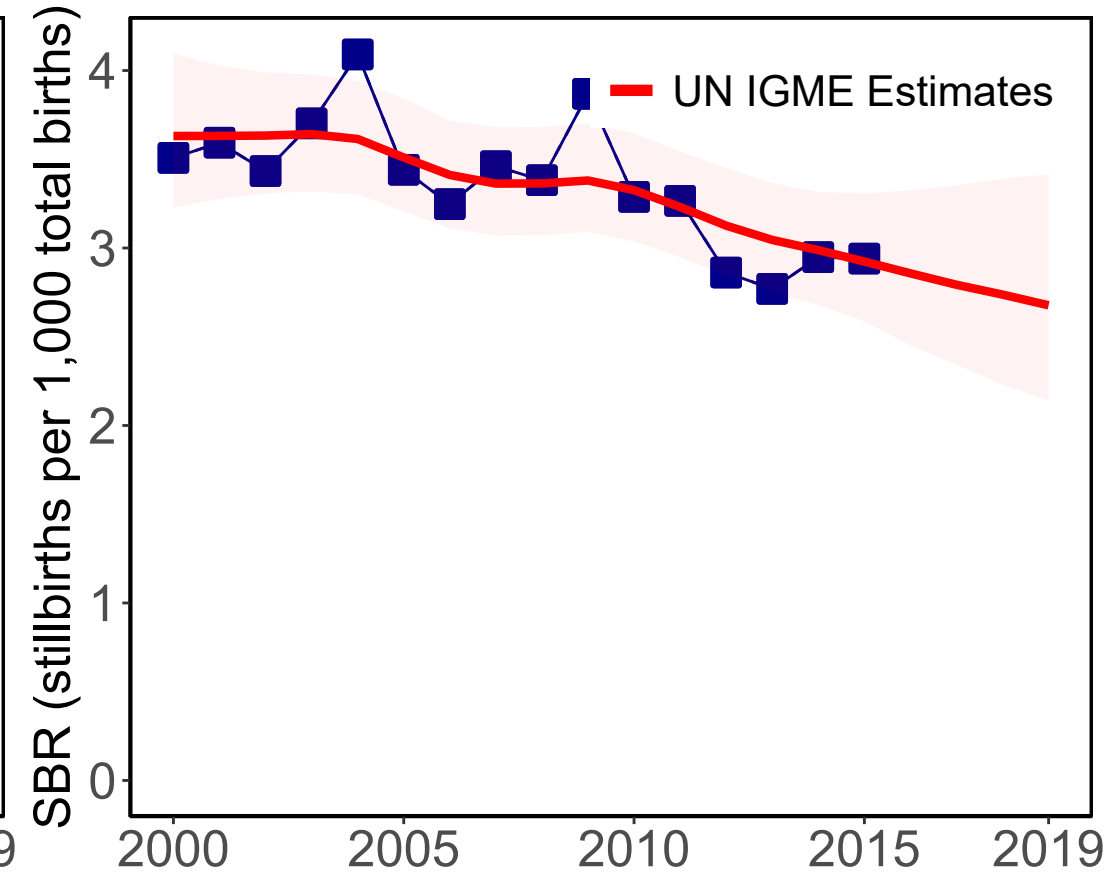

#### Source Types

□ Administrative

#### Data Sources

□ Vital Registration (1000g)

■ Vital Registration (28wks adj from 1000g)

# Oman

### Available Data

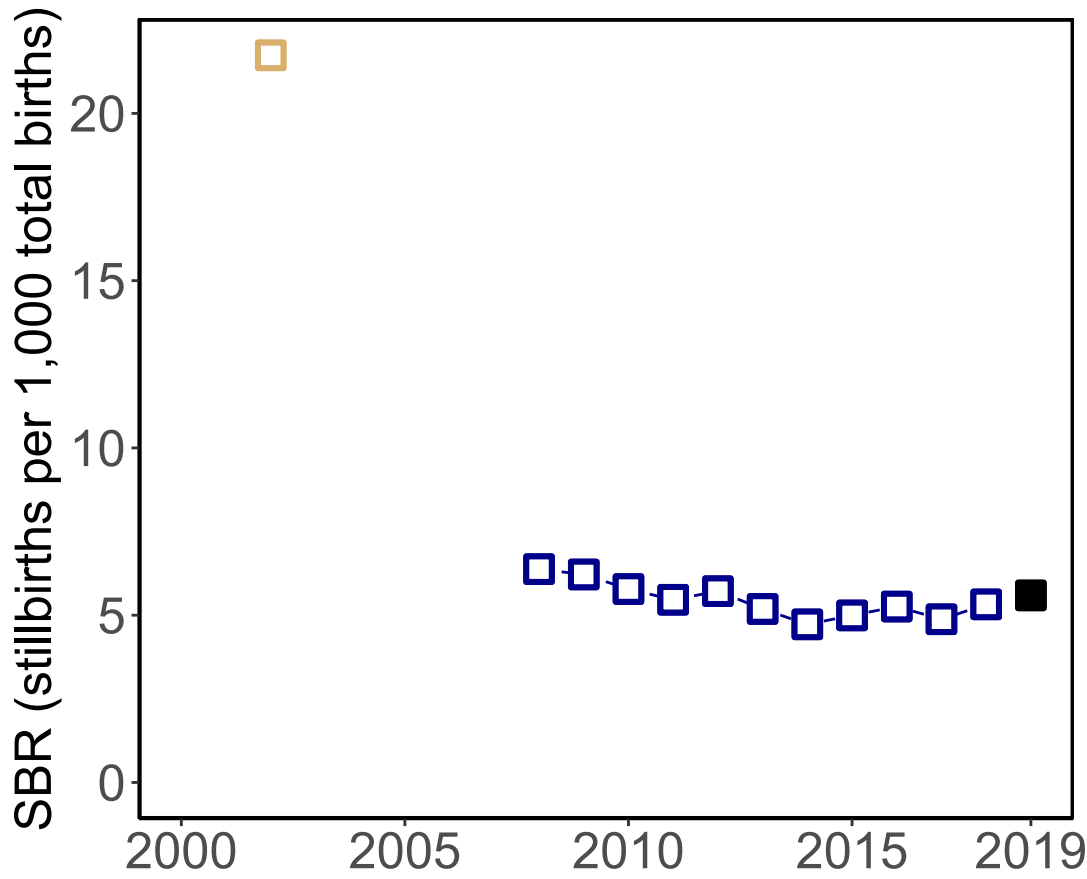

### '28+ Weeks of Gestation' Data (Incl. Adjusted Data)

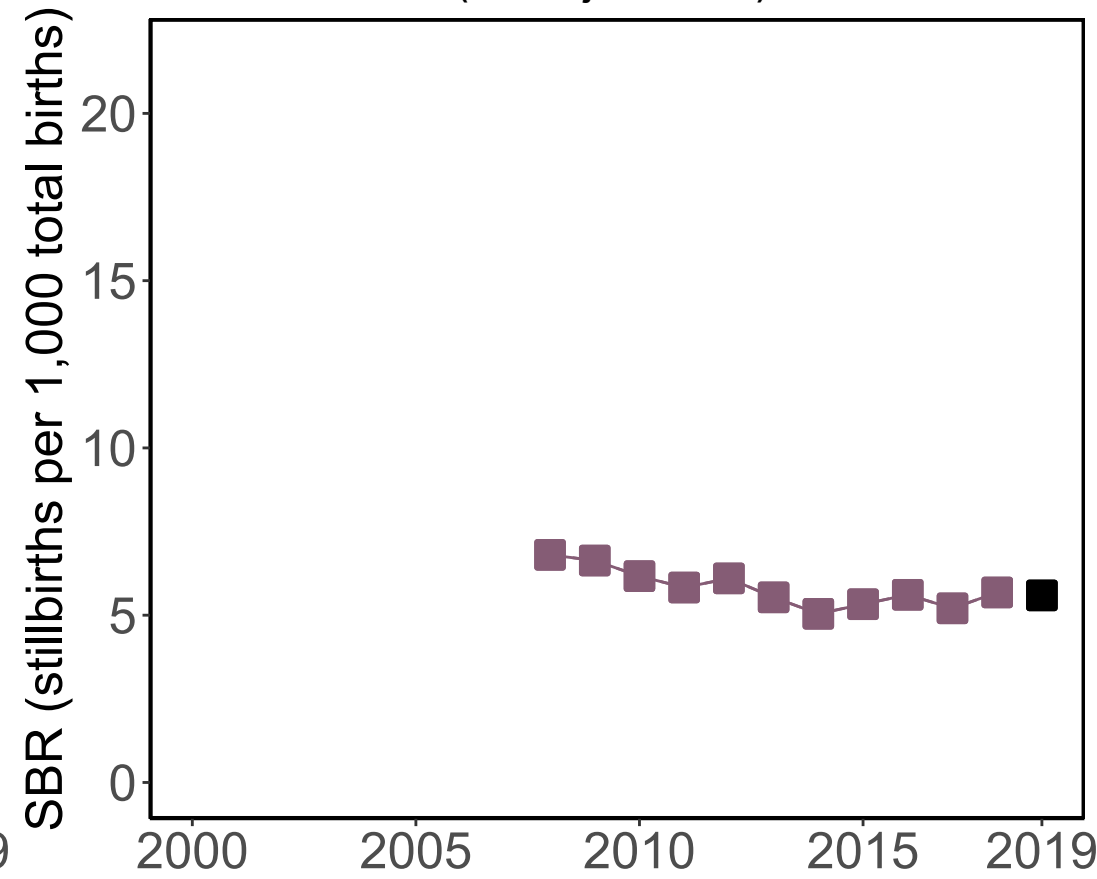

### Data Included in the Model

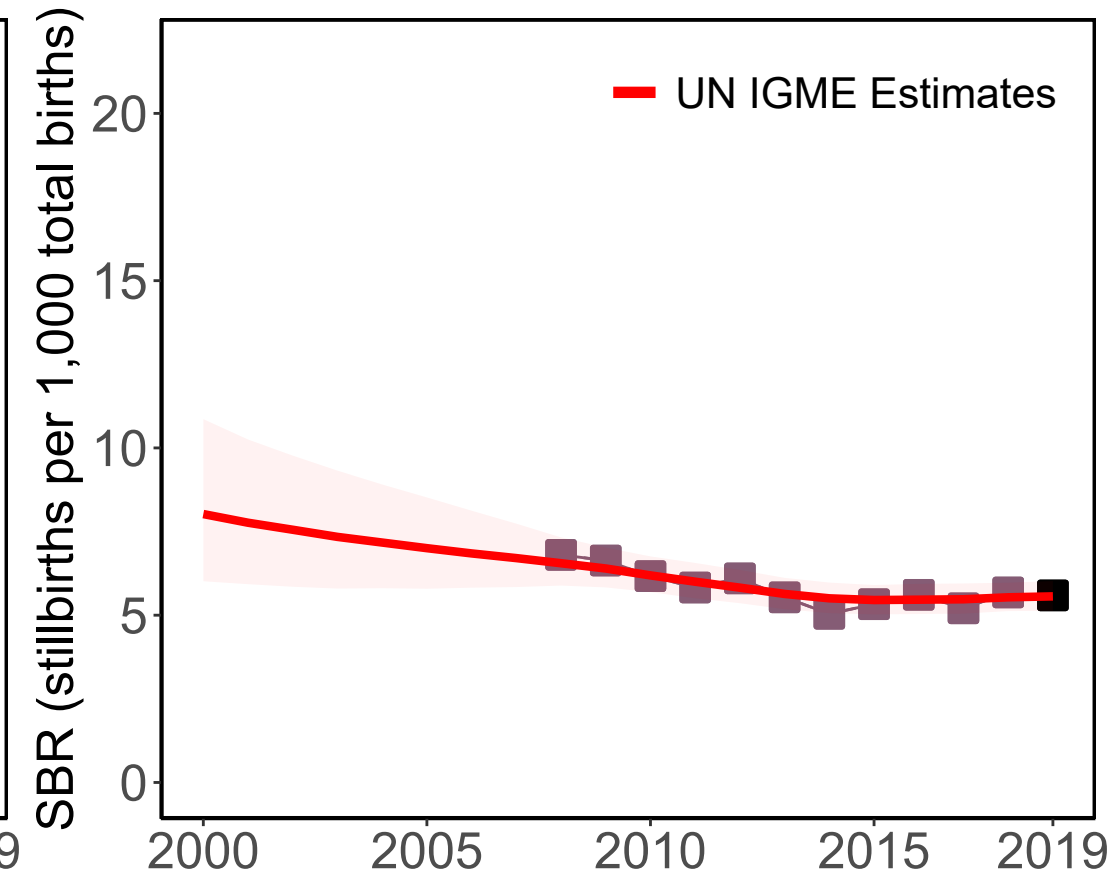

#### Source Types

Administrative

#### Data Sources

Vital Registration (28wks)

Vital Registration (1000g)

Vital Registration (28wks adj from 1000g)

Birth or Death Registry (any gestational age or birthweight)

# Pakistan

## Available Data

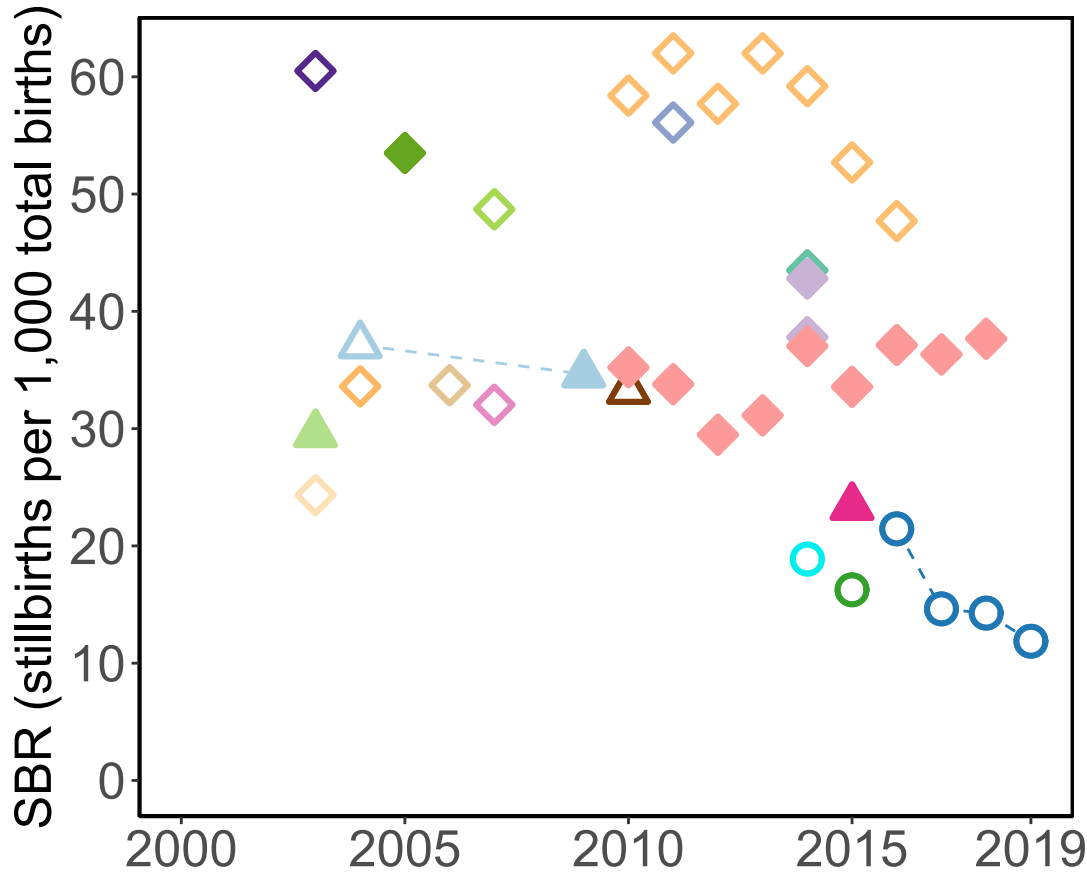

## '28+ Weeks of Gestation' Data (Incl. Adjusted Data)

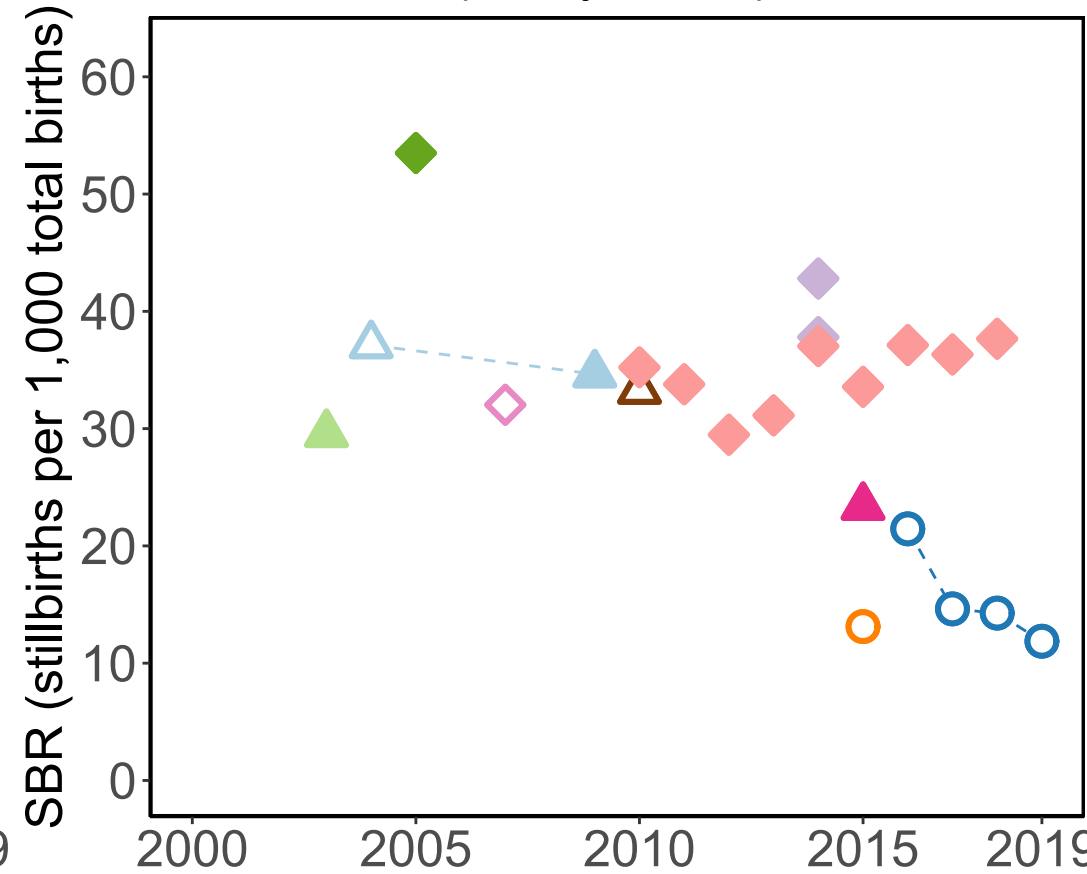

## Data Included in the Model

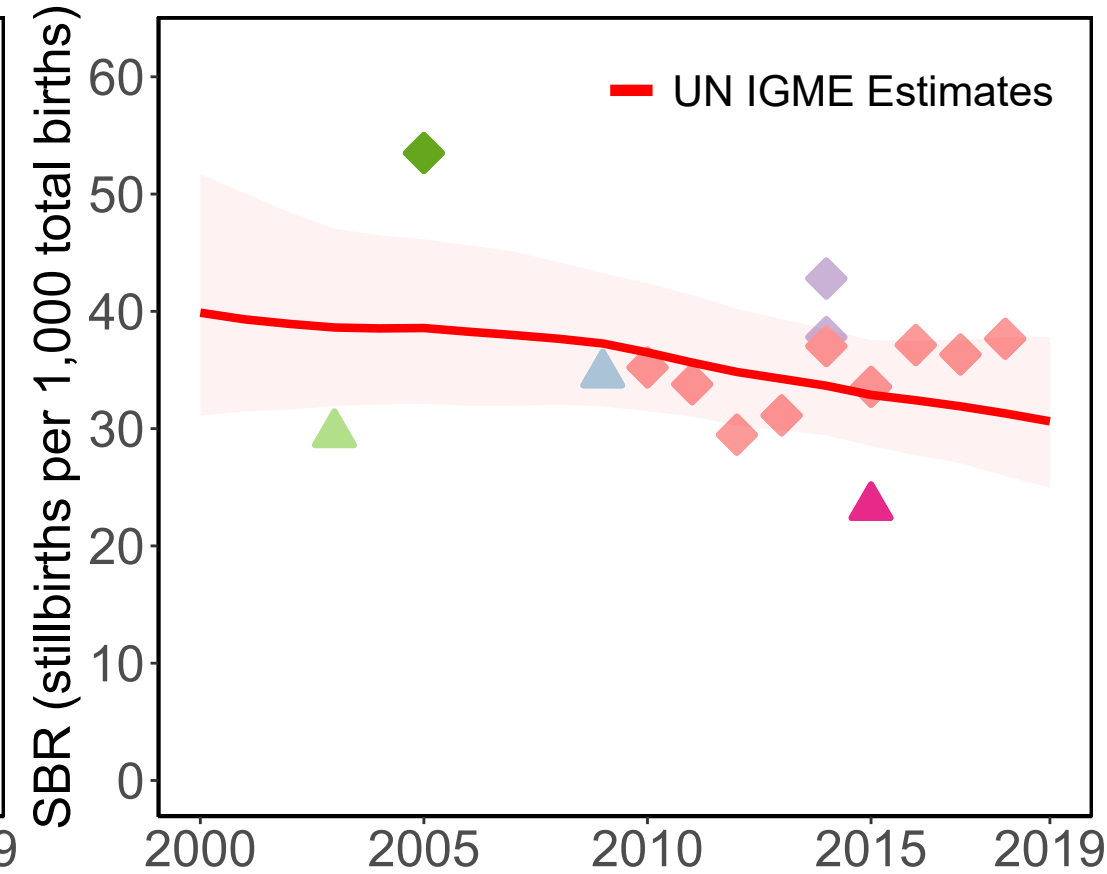

### Data Sources

- |                                                          |                                                             |                               |                           |
|----------------------------------------------------------|-------------------------------------------------------------|-------------------------------|---------------------------|
| HMIS-DHIS2 (28wks)                                       | Demographic and Health Survey 2012-13 (DHS) (RC) (28wks)    | McClure 2018 (500g or 20wks)  | McClure 2007 (1000g)      |
| HMIS-DHIS2 (22wks)                                       | Demographic and Health Survey 2012-13 (DHS) (PH) (28wks)    | Saleem 2018 (500g or 20wks)   | Bhutta 2009 (28wks)       |
| HMIS-DHIS2 (28wks adj from 22wks)                        | Demographic and Health Survey 2006-07 (DHS) (PH/SQ) (28wks) | Saleem 2014 (1000g and 28wks) | Jehan 2007 (not defined)  |
| HMIS-DHIS2 (not defined)                                 | AMANHI 2018 (28wks)                                         | Bhutta 2011 (not defined)     | Bhutta 2008 (not defined) |
| Demographic and Health Survey 2017-18 (DHS) (RC) (28wks) | Global Network Re-analysed (28wks)                          | McClure 2011 (28wks)          | Memon 2015 (not defined)  |

### Source Types

- HMIS 
 Survey 
 Population study

# Panama

### Available Data

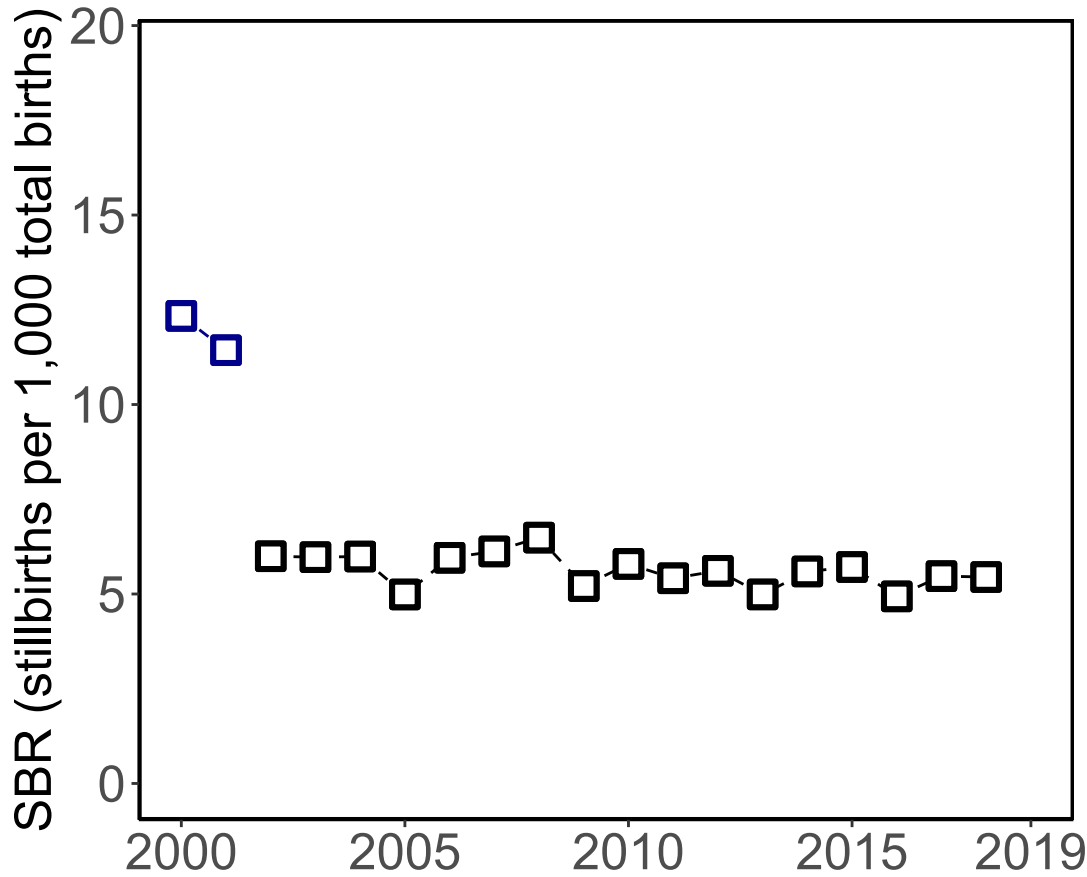

### '28+ Weeks of Gestation' Data (Incl. Adjusted Data)

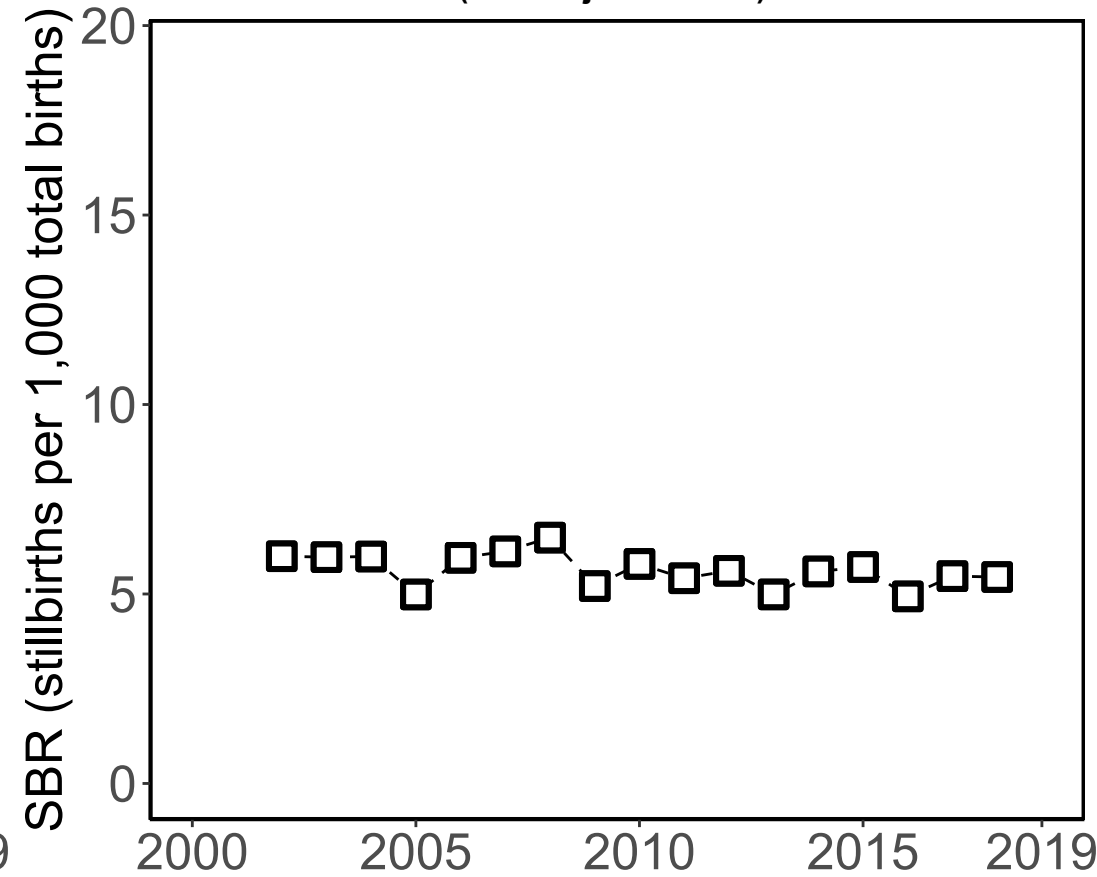

### Data Included in the Model

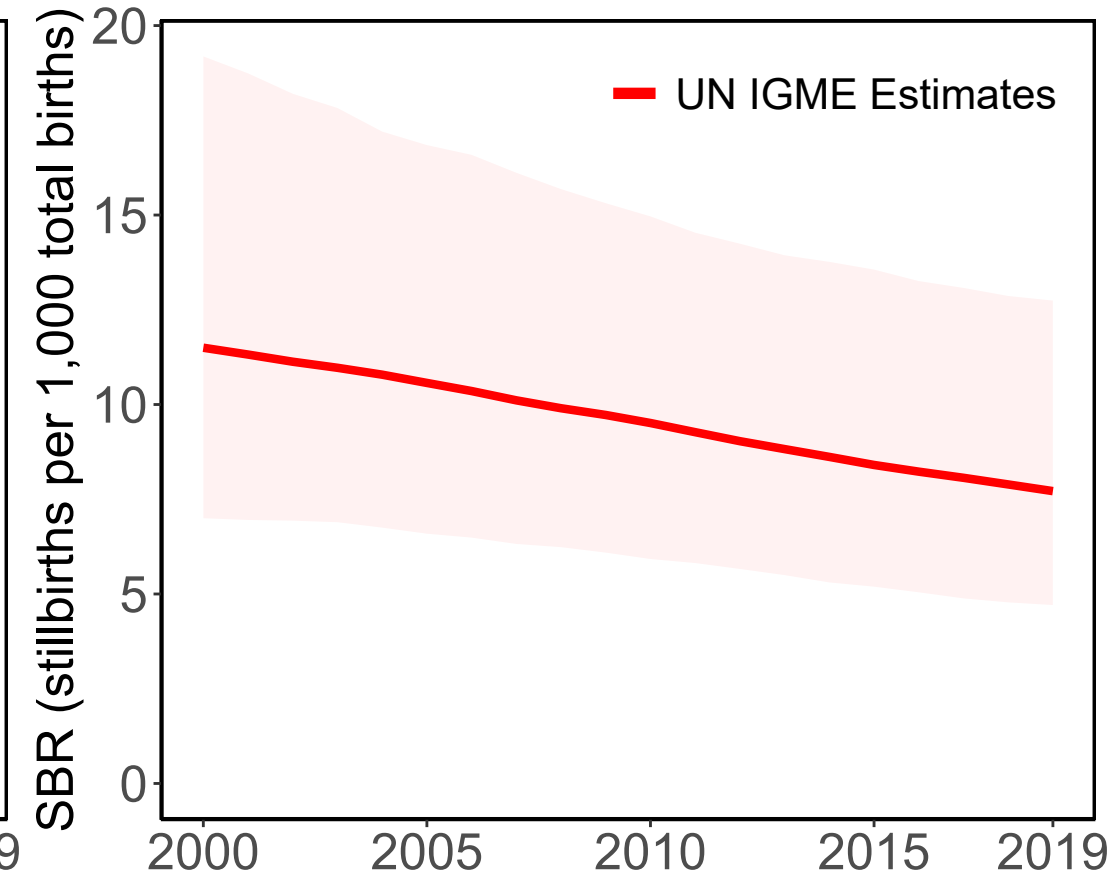

#### Source Types

□ Administrative

#### Data Sources

□ Vital Registration (28wks)

□ Vital Registration (20wks)

# Peru

Available Data

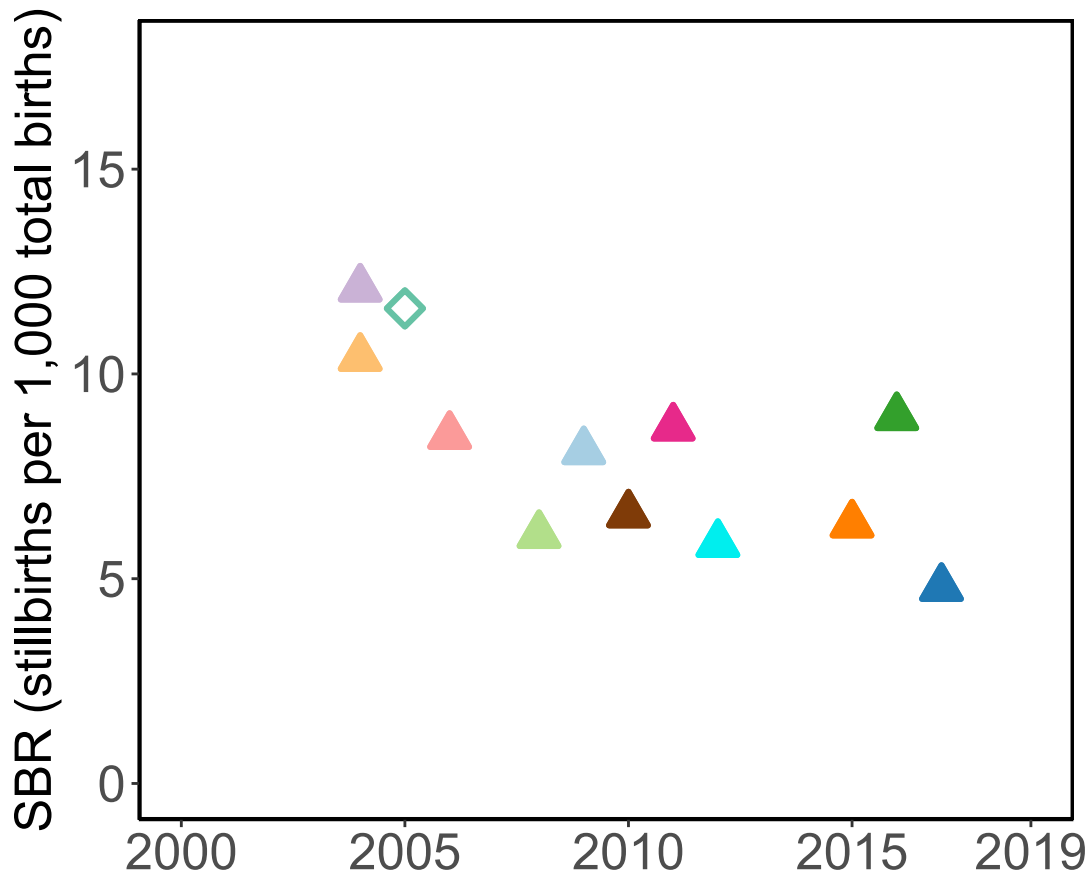

'28+ Weeks of Gestation' Data  
(Incl. Adjusted Data)

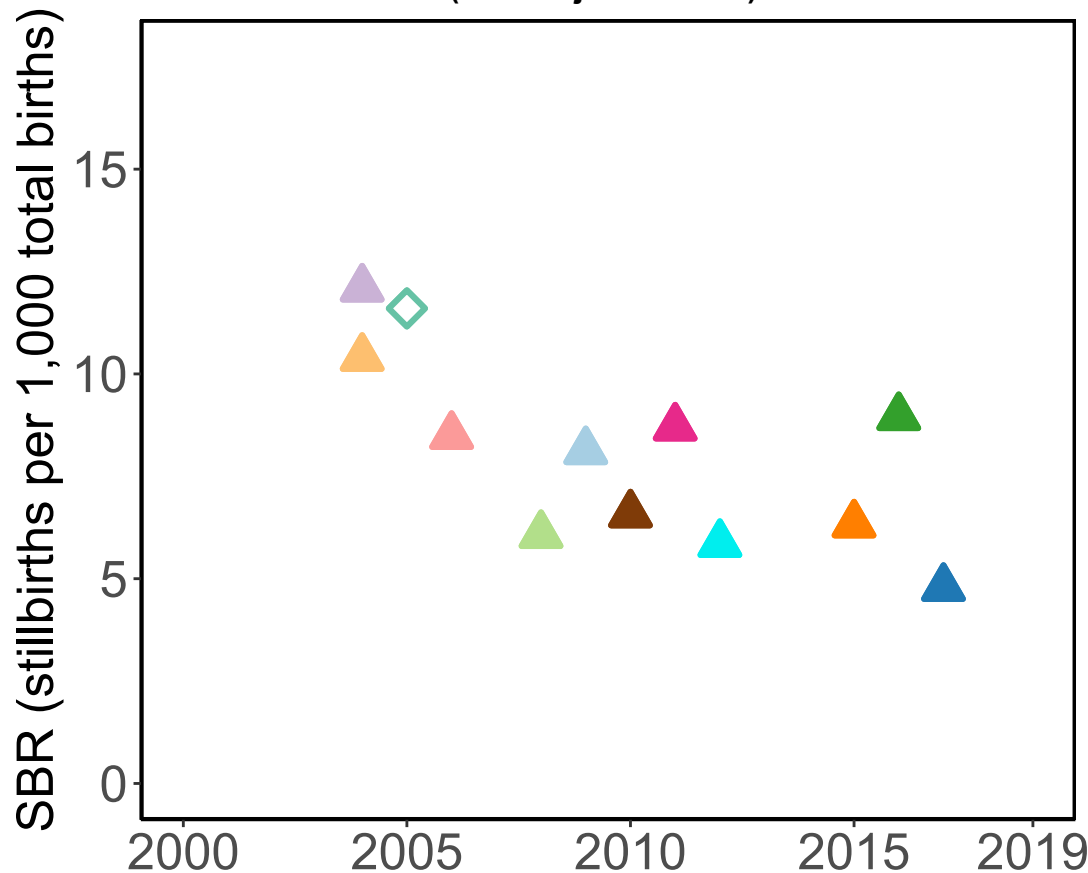

Data Included in the Model

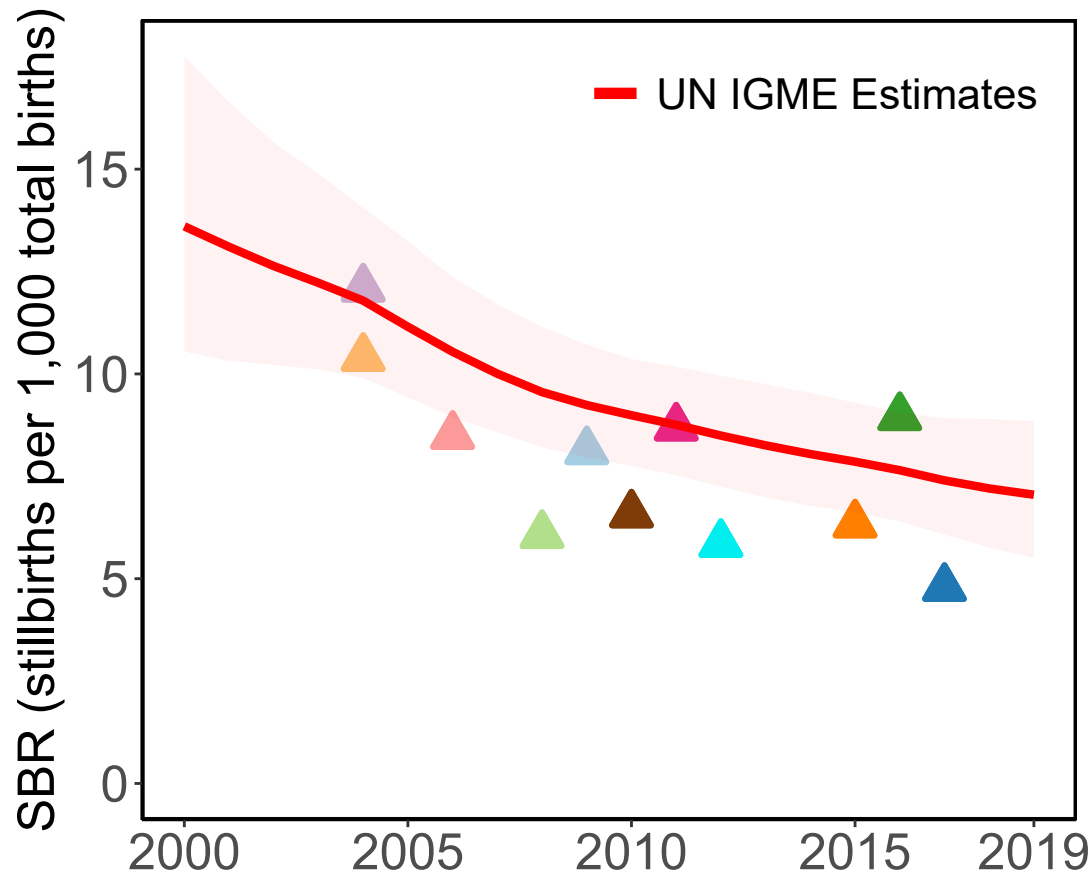

**Data Sources**

-  Encuesta Demográfica y de Salud Familiar 2019 (DHS) (RC) (28wks)
-  Encuesta Demográfica y de Salud Familiar 2014 (DHS) (RC) (28wks)
-  Encuesta Demográfica y de Salud Familiar 2011 (DHS) (RC) (28wks)
-  Demographic and Health Survey 2004-08 (DHS) (RC) (28wks)
-  Demographic and Health Survey (Continuous) 2018 (DHS) (RC) (28wks)
-  Encuesta Demográfica y de Salud Familiar 2013 (DHS) (RC) (28wks)
-  Encuesta Demográfica y de Salud Familiar 2010 (DHS) (RC) (28wks)
-  Encuesta Demográfica y de Salud Familiar 2007-08 (DHS) (RC) (28wks)
-  Demographic and Health Survey (Continuous) 2017 (DHS) (RC) (28wks)
-  Encuesta Demográfica y de Salud Familiar 2012 (DHS) (RC) (28wks)
-  Encuesta Demográfica y de Salud Familiar 2009 (DHS) (RC) (28wks)
-  Gonzales 2007 (28wks)

**Source Types**

-  Survey
-  Population study

# Philippines

Available Data

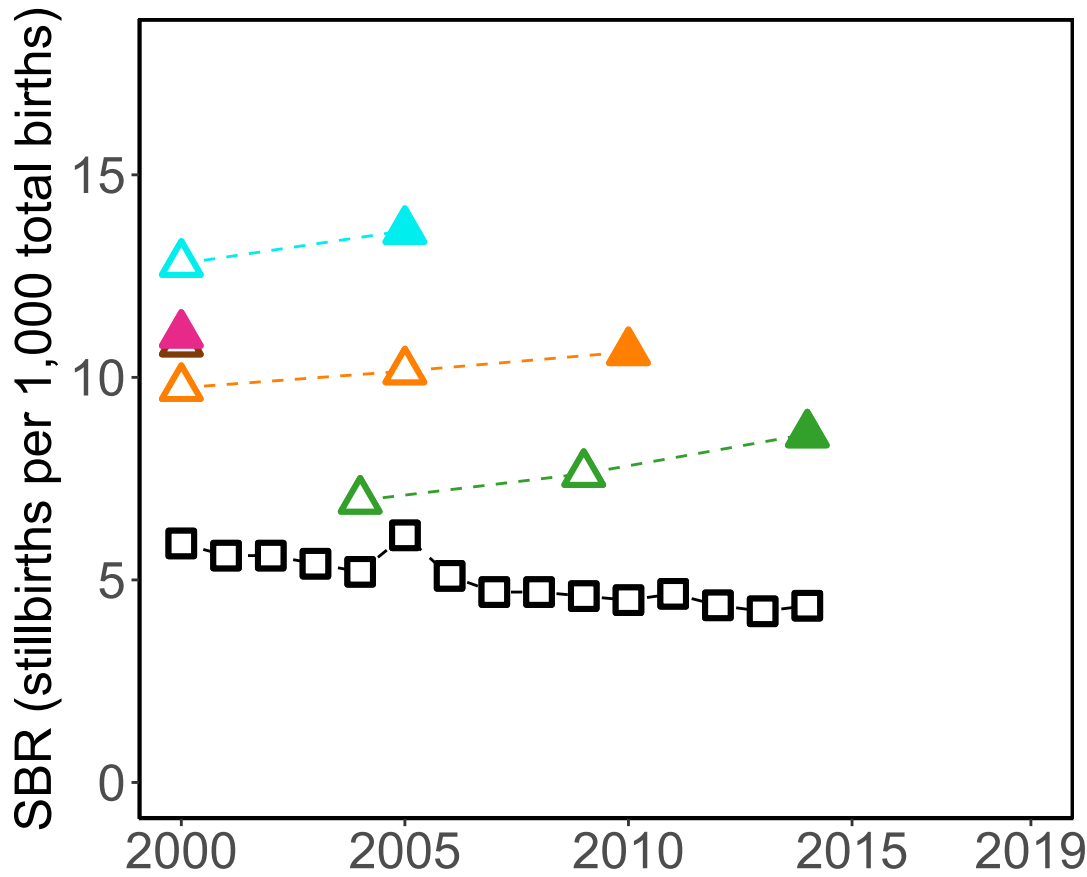

'28+ Weeks of Gestation' Data  
(Incl. Adjusted Data)

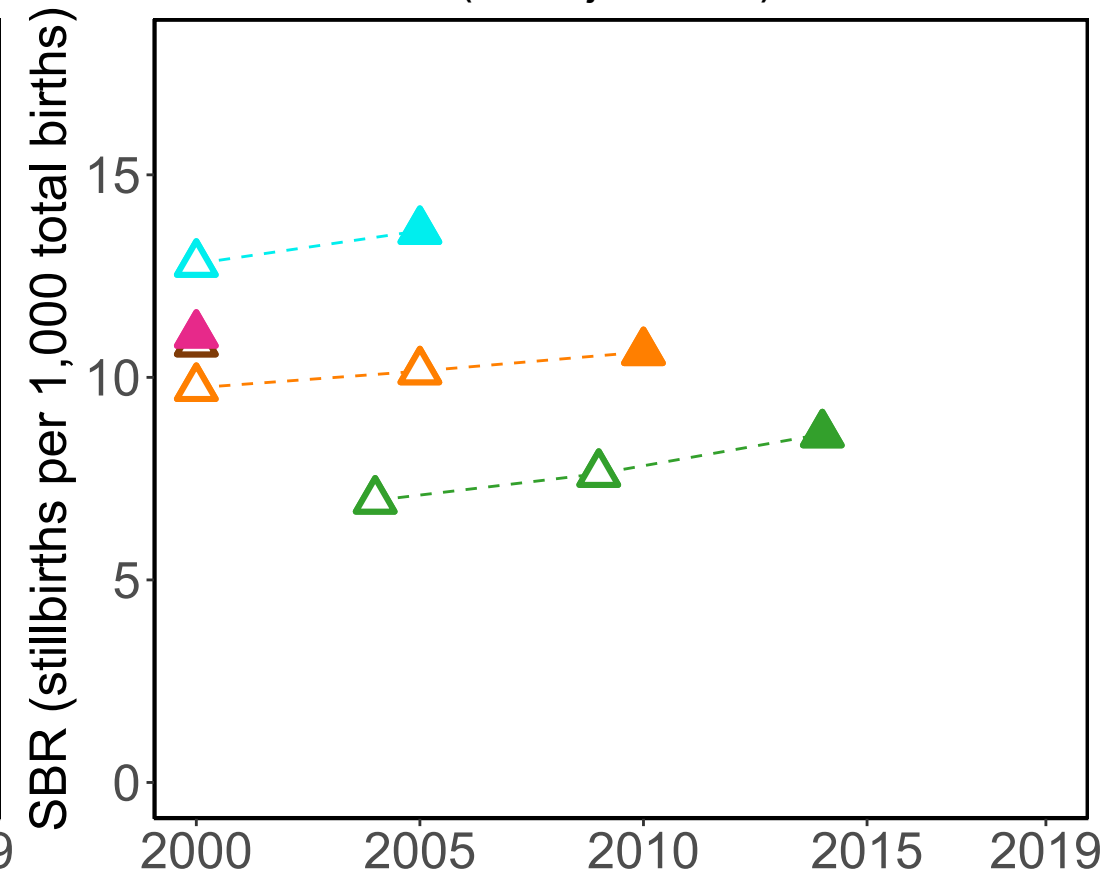

Data Included in the Model

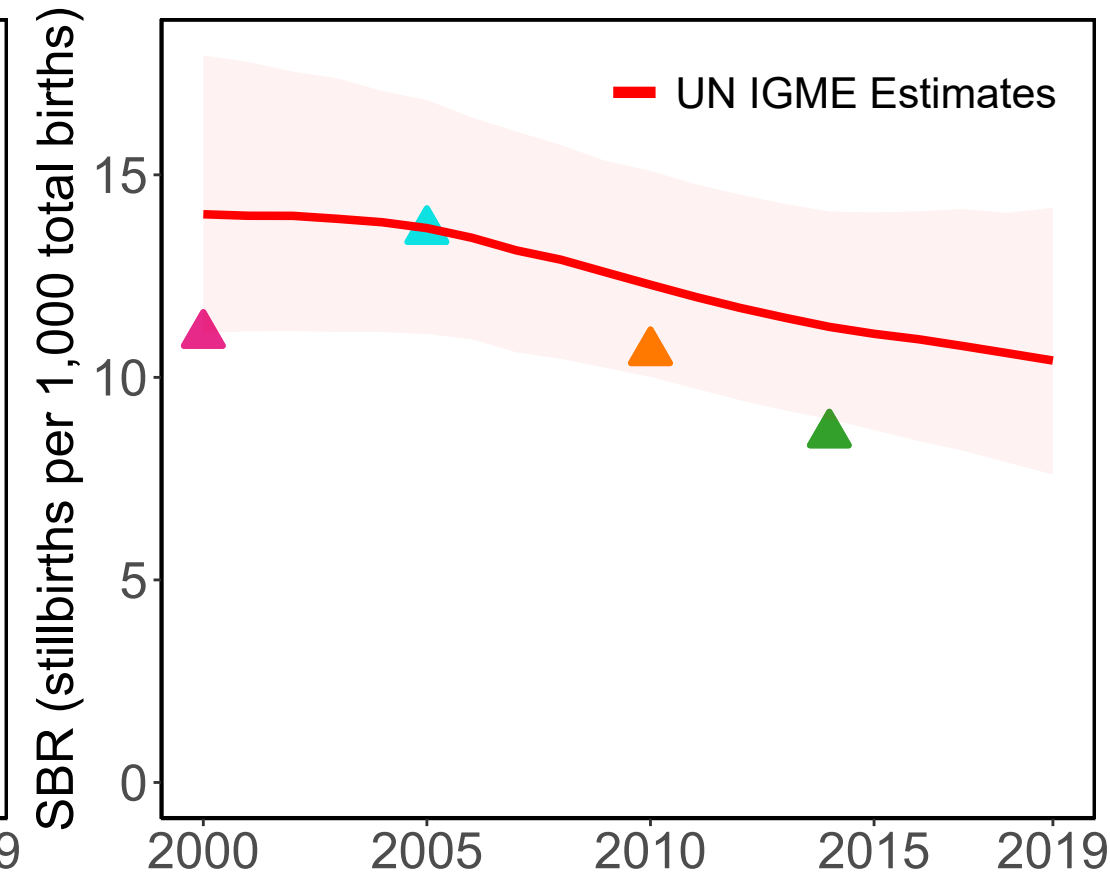

Source Types

□ Administrative    △ Survey

Data Sources

□ Vital Registration (any gestational age or birthweight)

▲ Demographic and Health Survey 2017 (DHS) (PH) (28wks)

▲ National Demographic and Health Survey 2013 (DHS) (PH) (28wks)

▲ National Demographic and Health Survey 2008 (DHS) (PH) (28wks)

▲ National Demographic and Health Survey 2003 (DHS) (PH) (28wks)

▲ National Demographic and Health Survey 2003 (DHS) (RC) (28wks)

# Palau

### Available Data

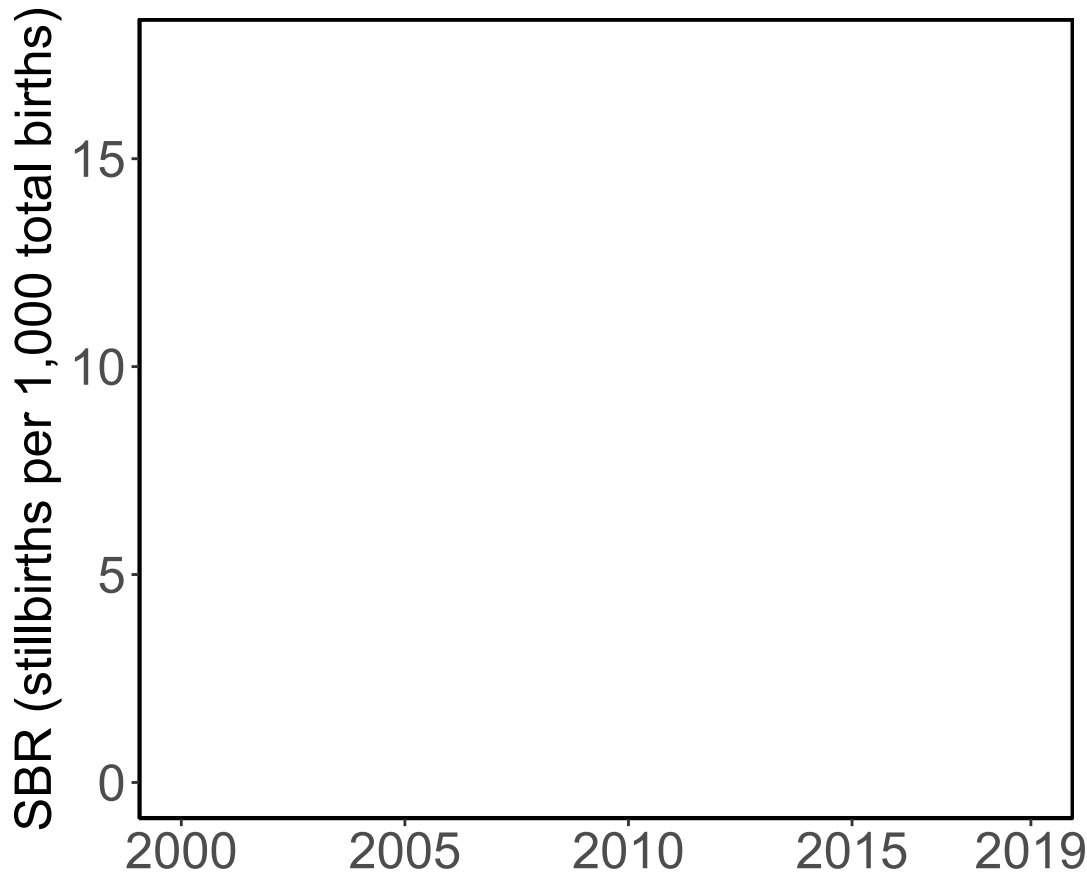

### '28+ Weeks of Gestation' Data (Incl. Adjusted Data)

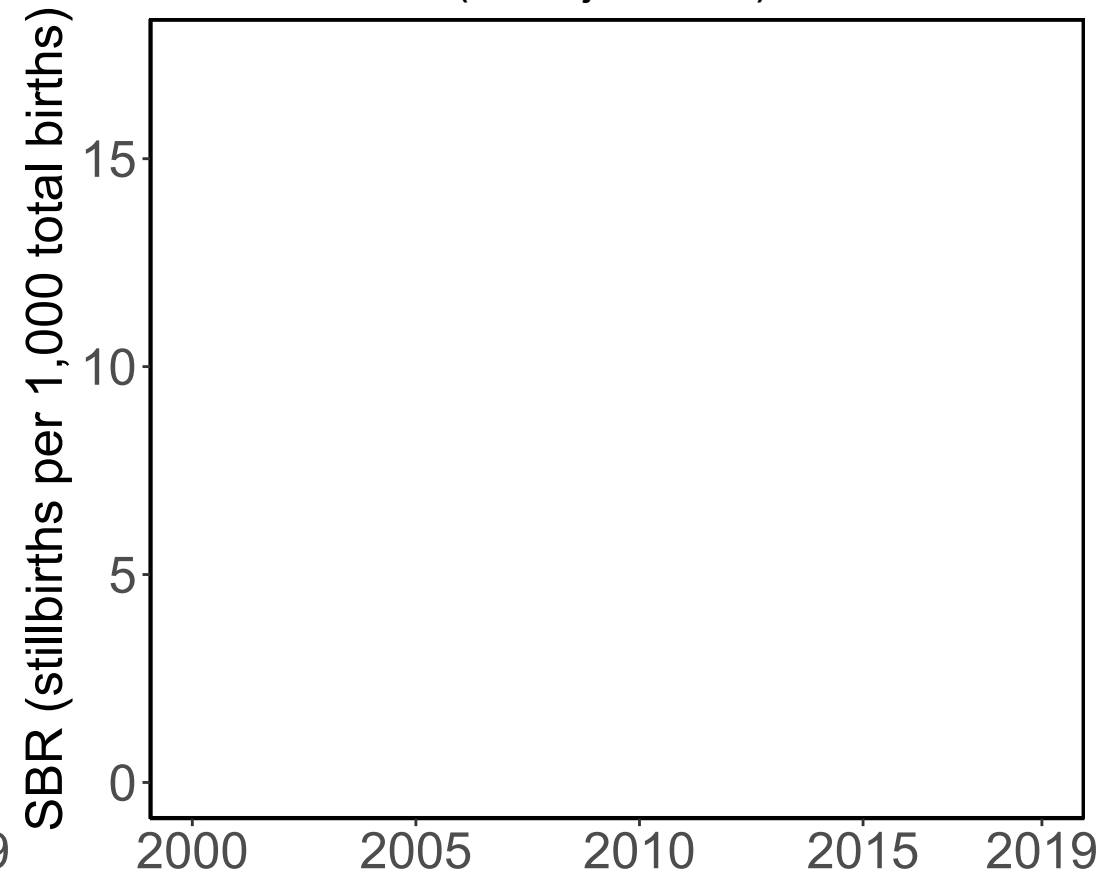

### Data Included in the Model

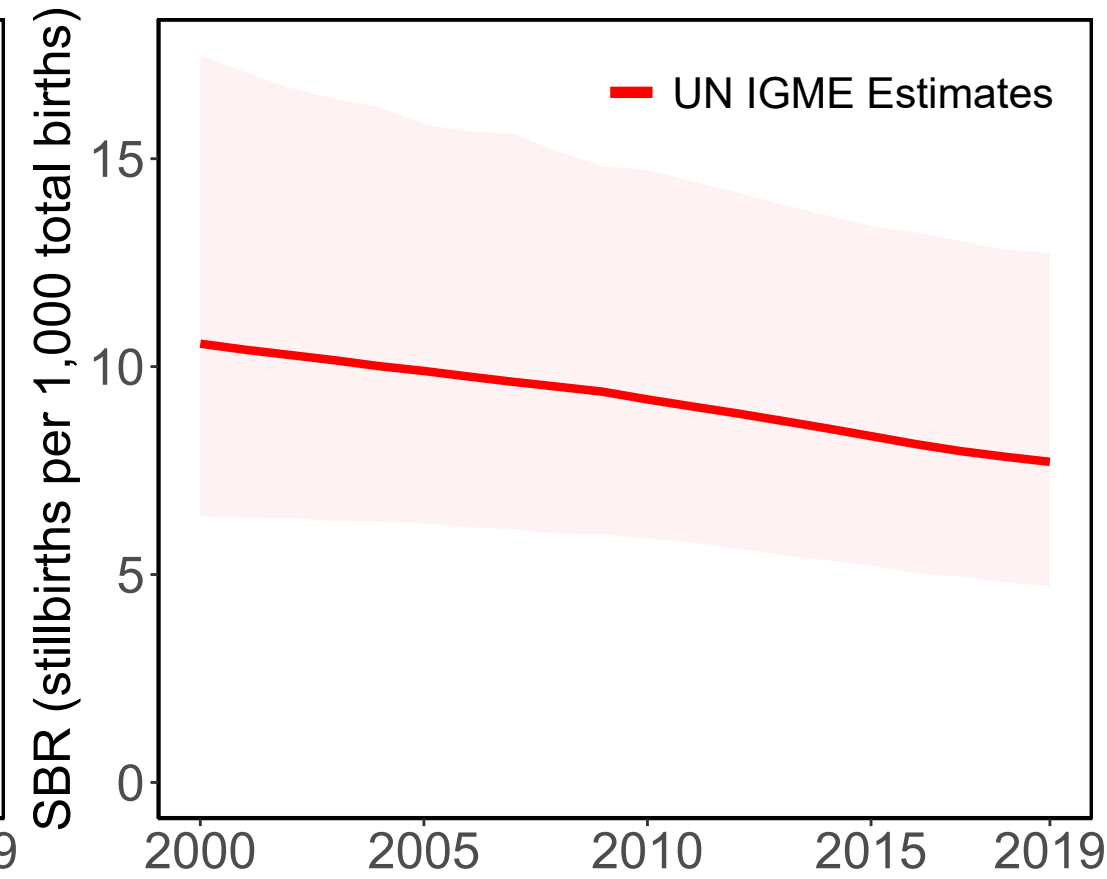

# Papua New Guinea

### Available Data

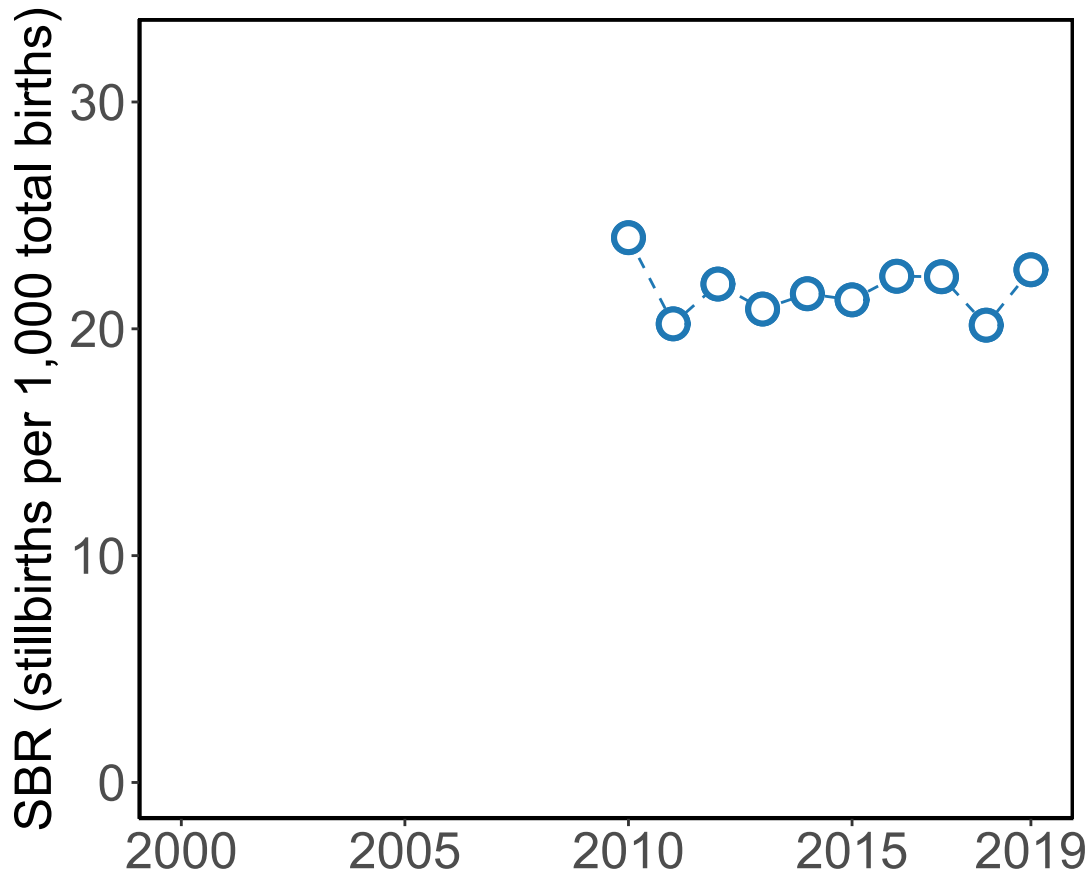

### '28+ Weeks of Gestation' Data (Incl. Adjusted Data)

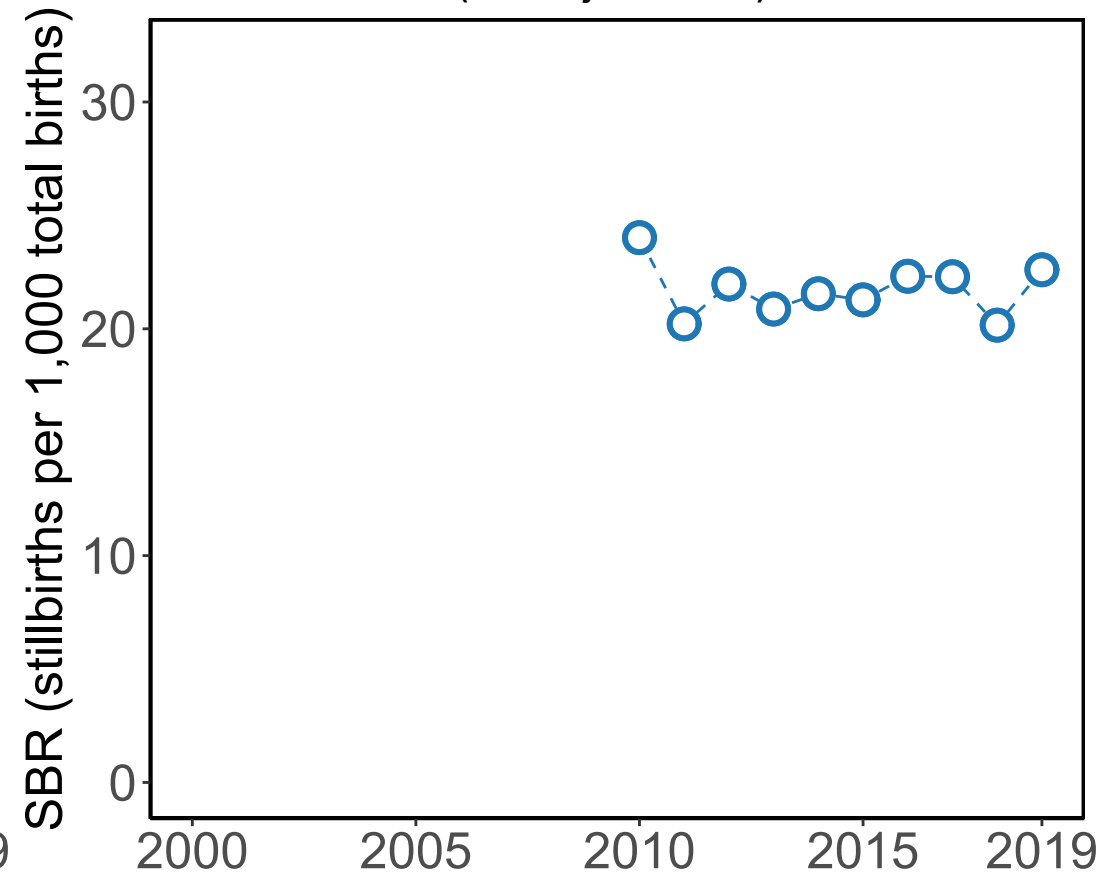

### Data Included in the Model

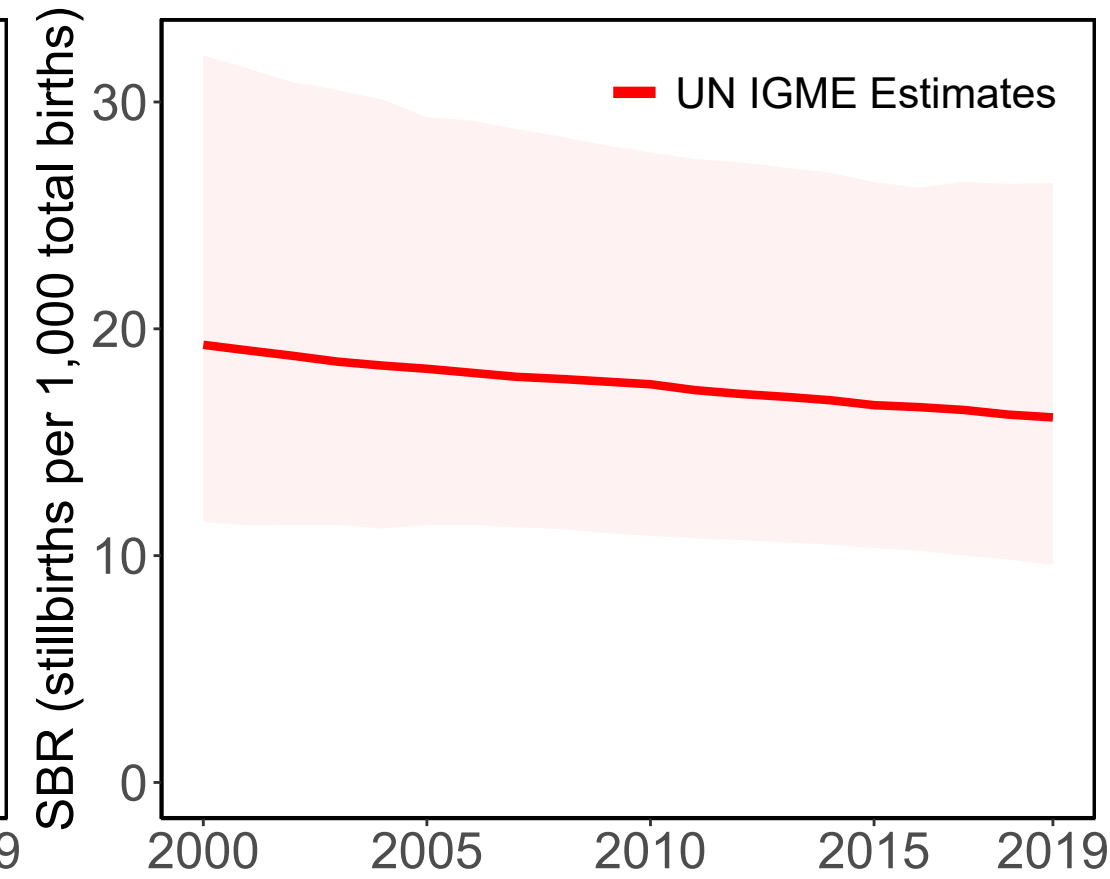

#### Source Types



#### Data Sources

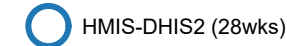



# Poland

Available Data

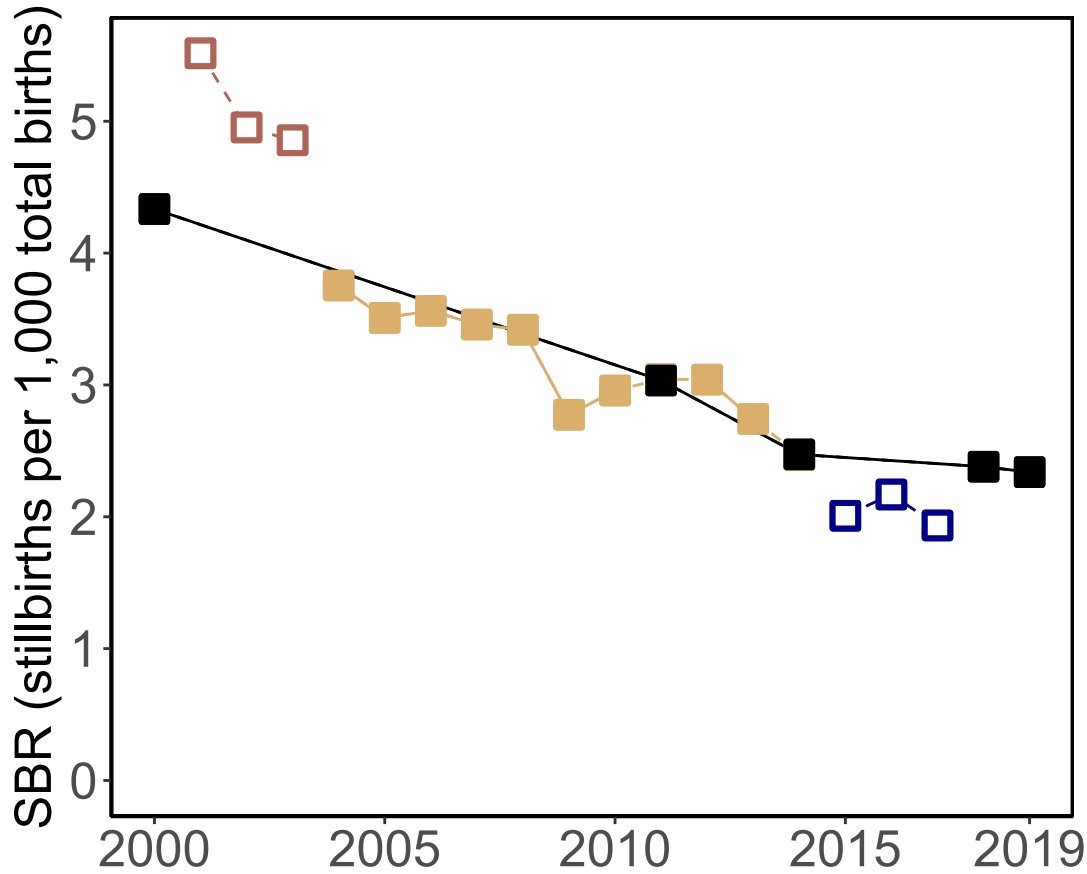

'28+ Weeks of Gestation' Data  
(Incl. Adjusted Data)

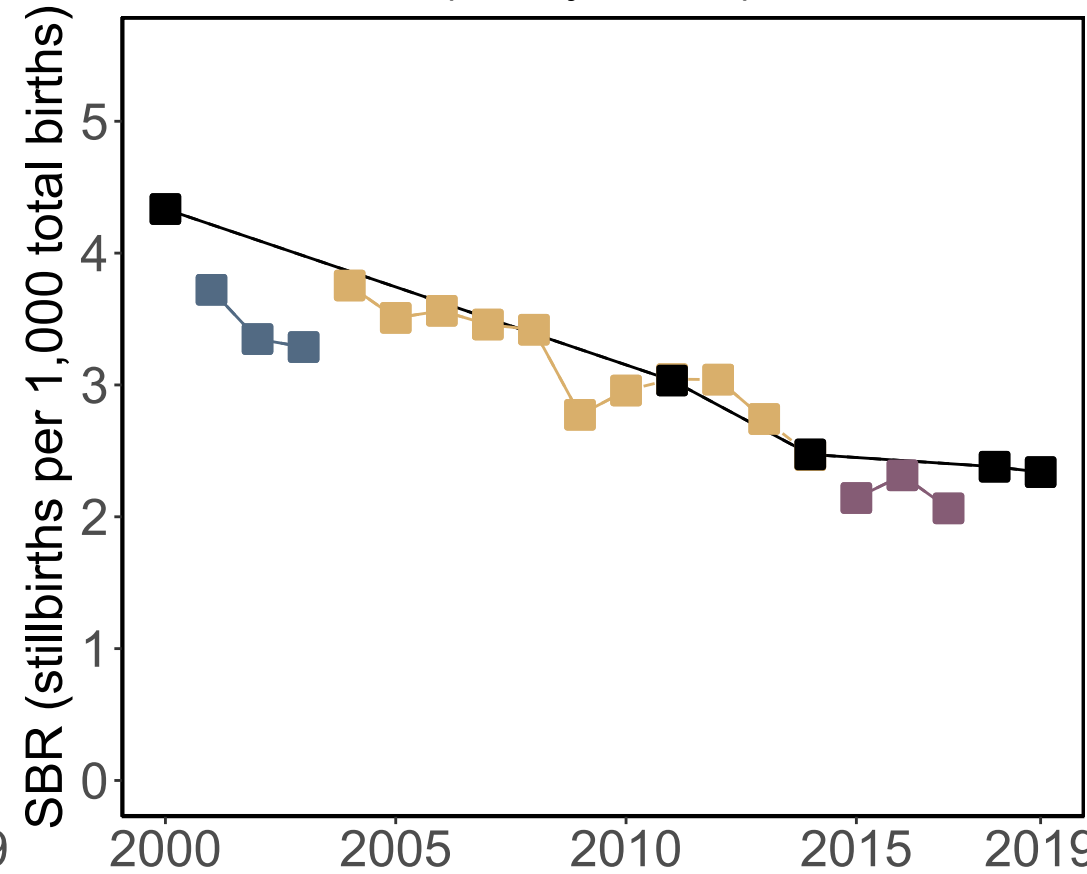

Data Included in the Model

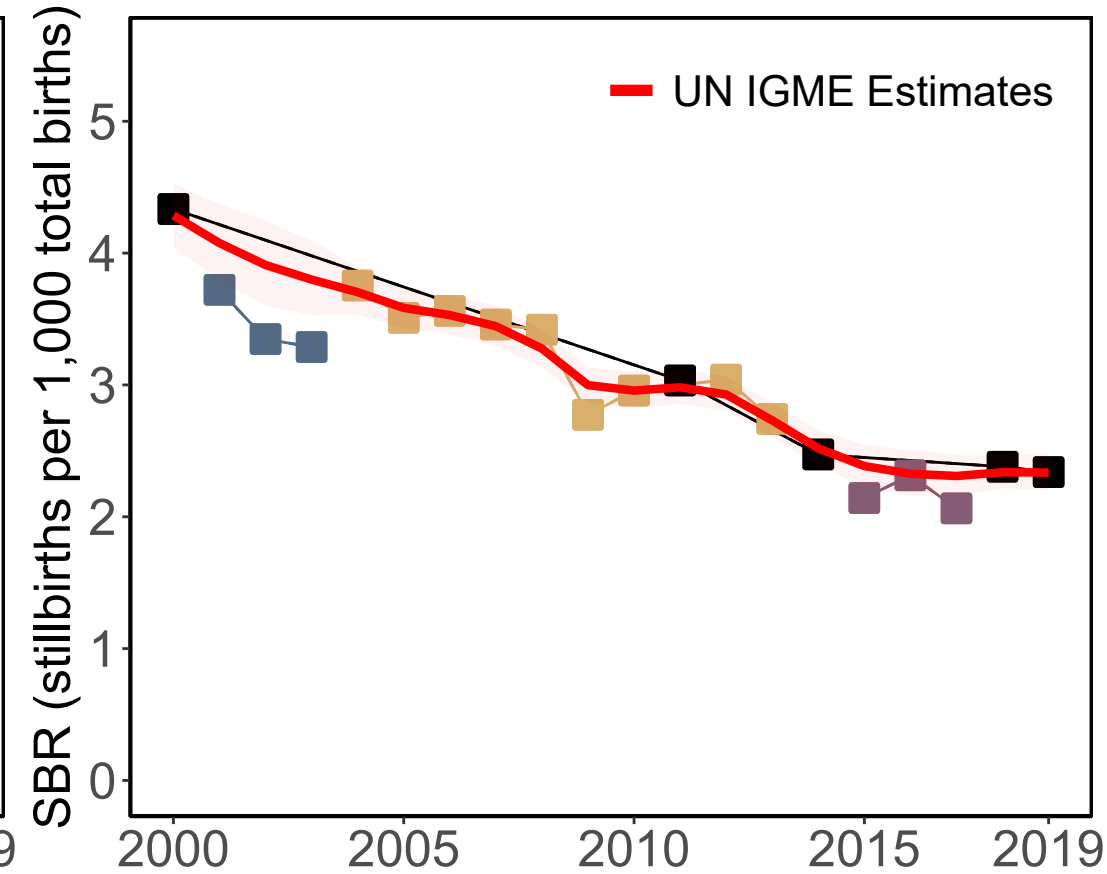

Data Sources

Source Types

Administrative

Birth or Death Registry (1000g)

Birth or Death Registry (28wks adj from 1000g)

Birth or Death Registry (28wks)

Vital Registration (28wks)

Birth or Death Registry (22wks)

Birth or Death Registry (28wks adj from 22wks)

# People's Republic of Korea

### Available Data

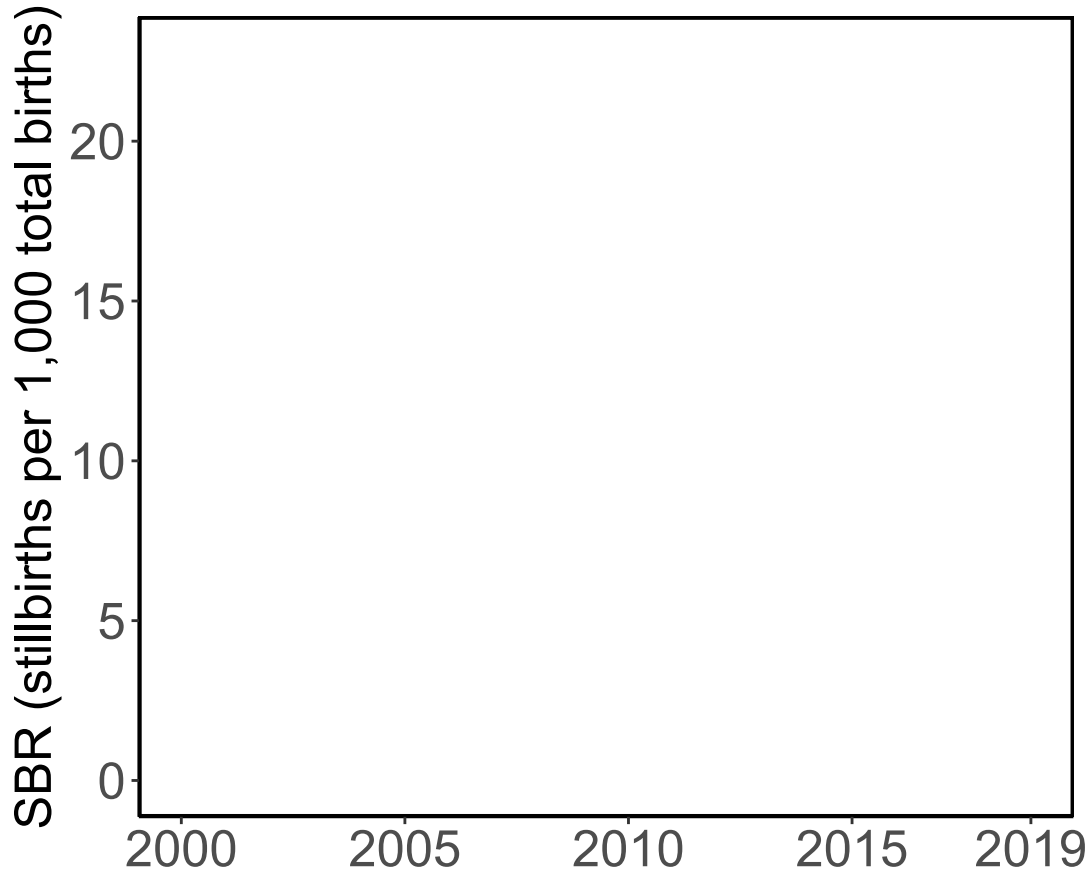

### '28+ Weeks of Gestation' Data (Incl. Adjusted Data)

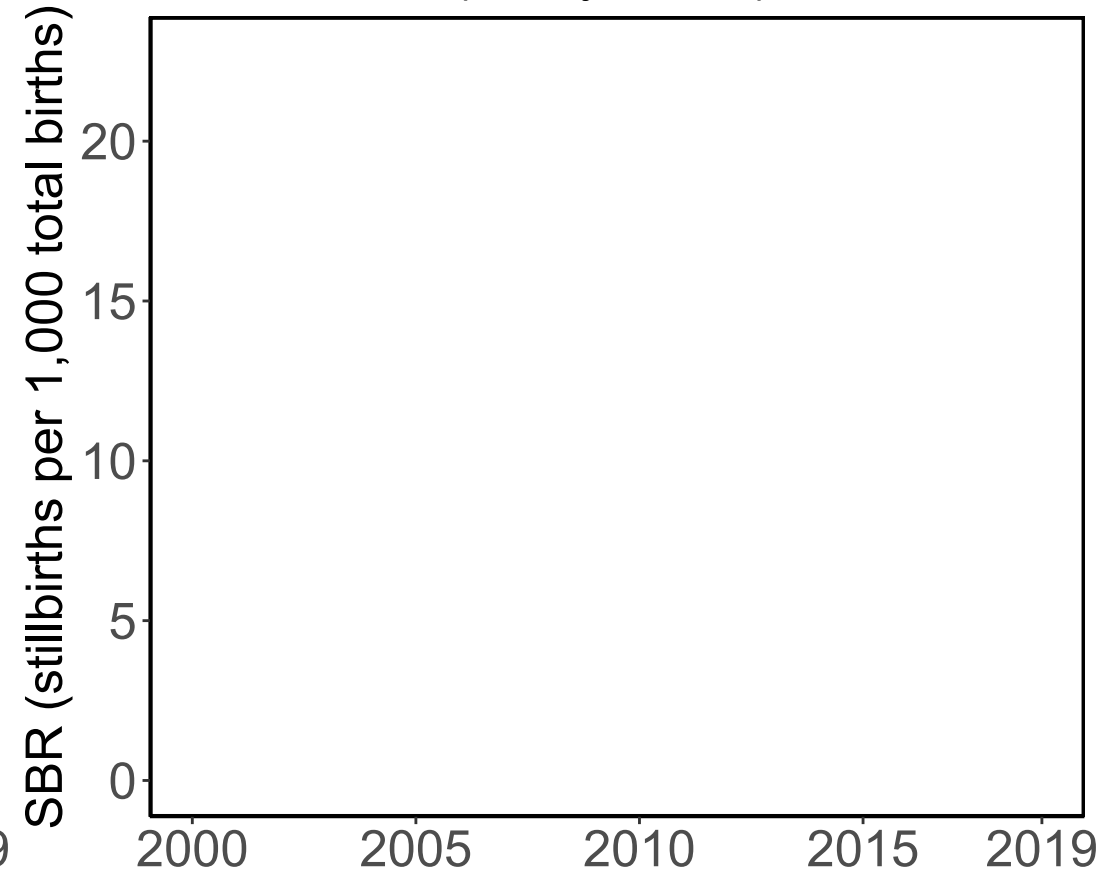

### Data Included in the Model

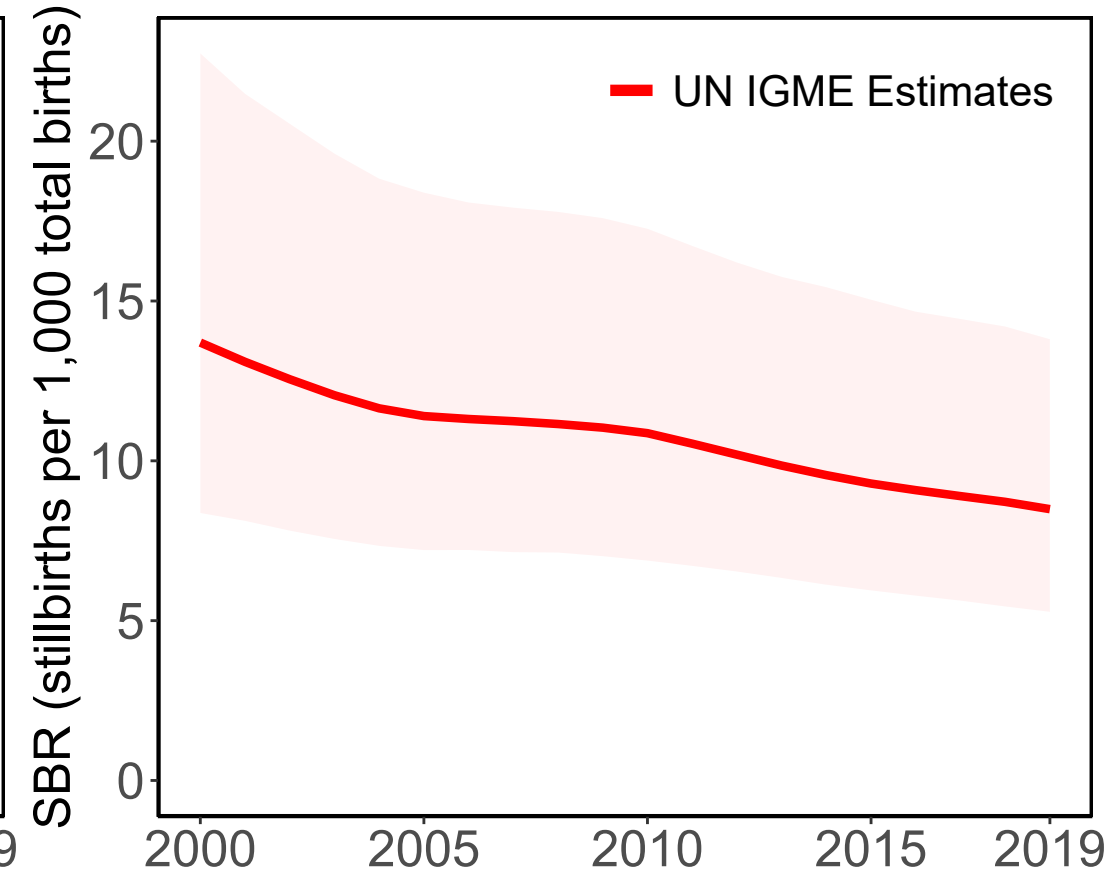

# Portugal

### Available Data

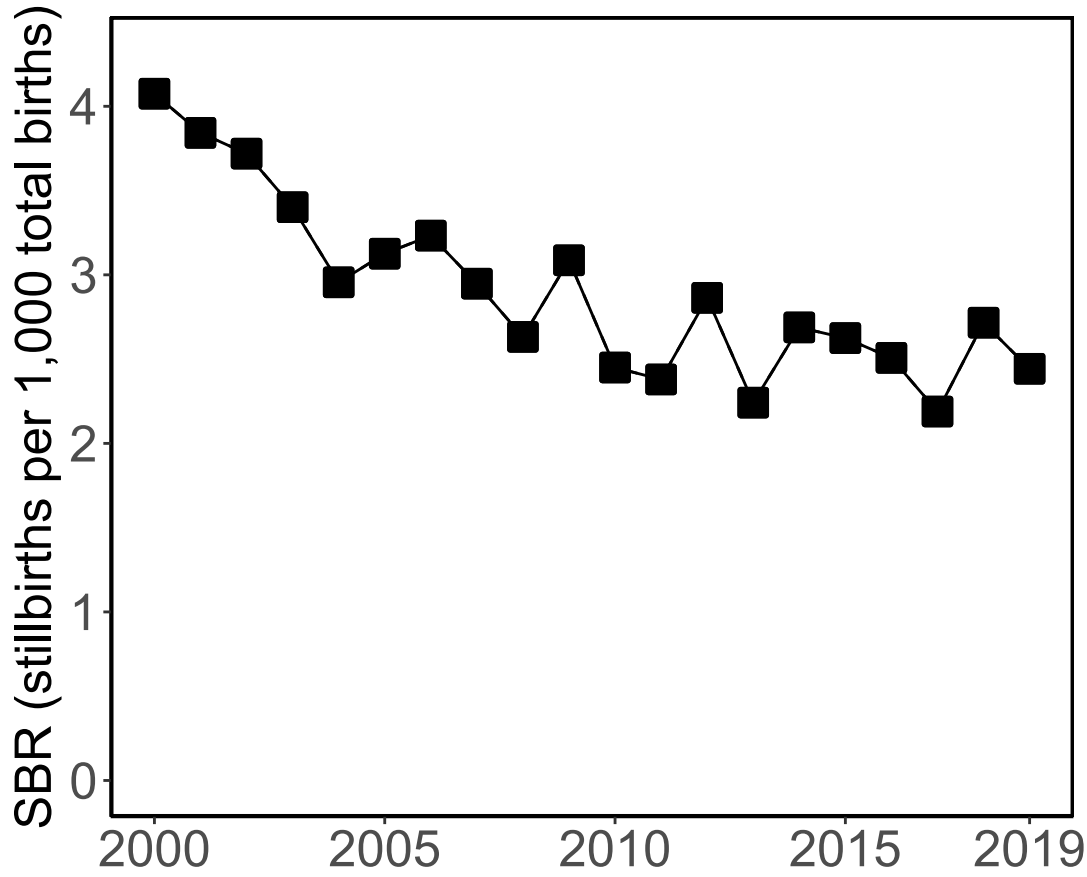

### '28+ Weeks of Gestation' Data (Incl. Adjusted Data)

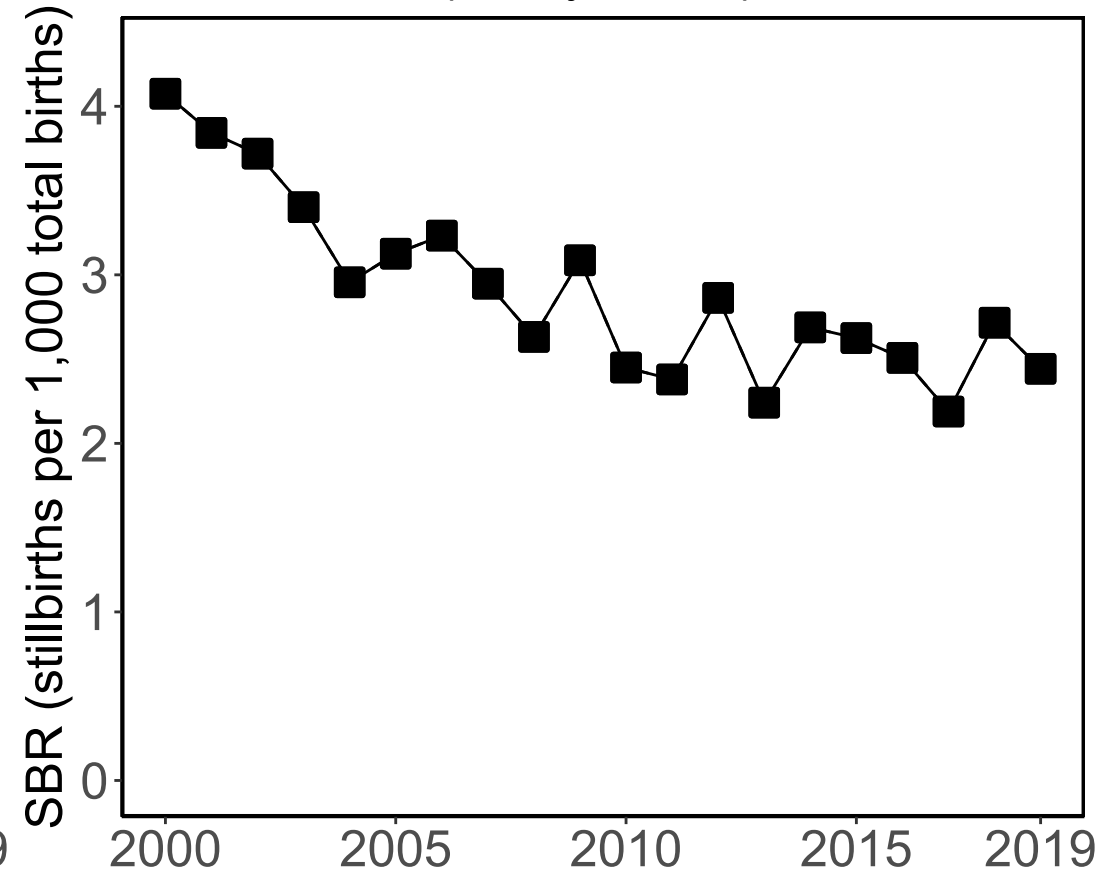

### Data Included in the Model

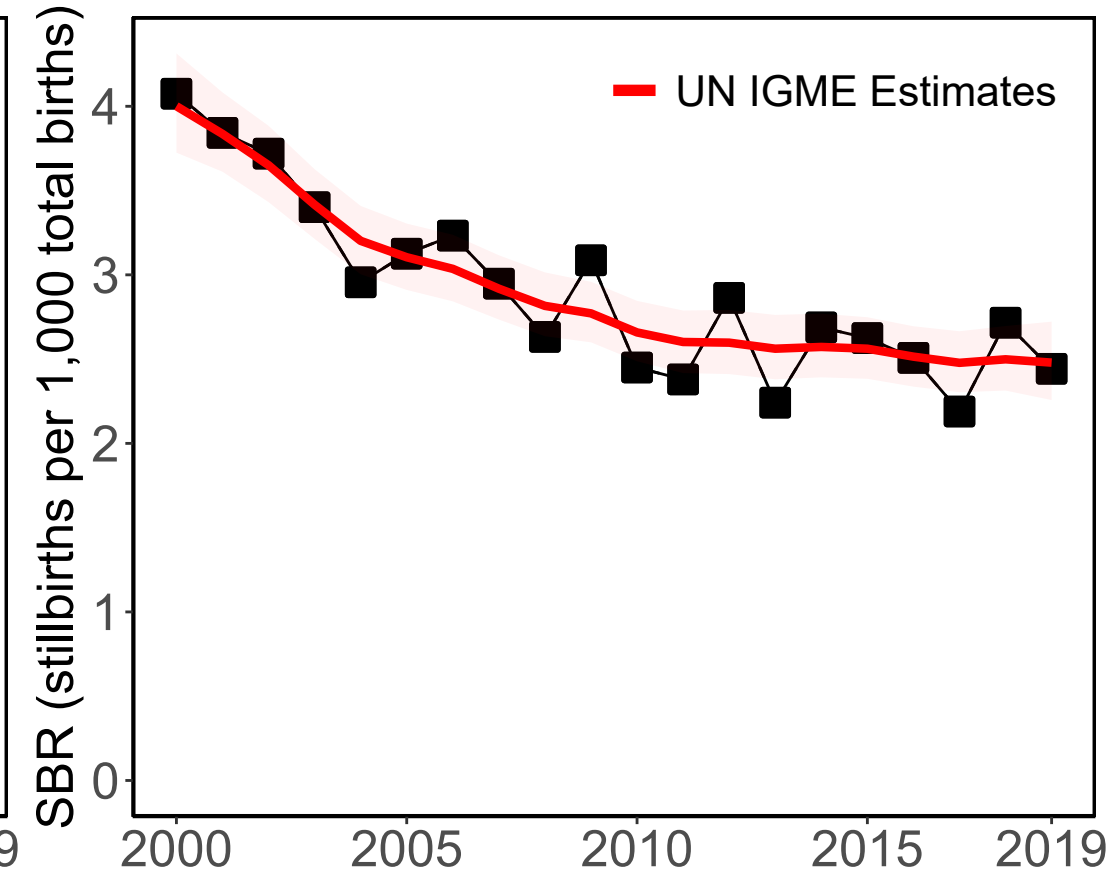

#### Source Types

Administrative

#### Data Sources

Vital Registration (28wks)

# Paraguay

### Available Data

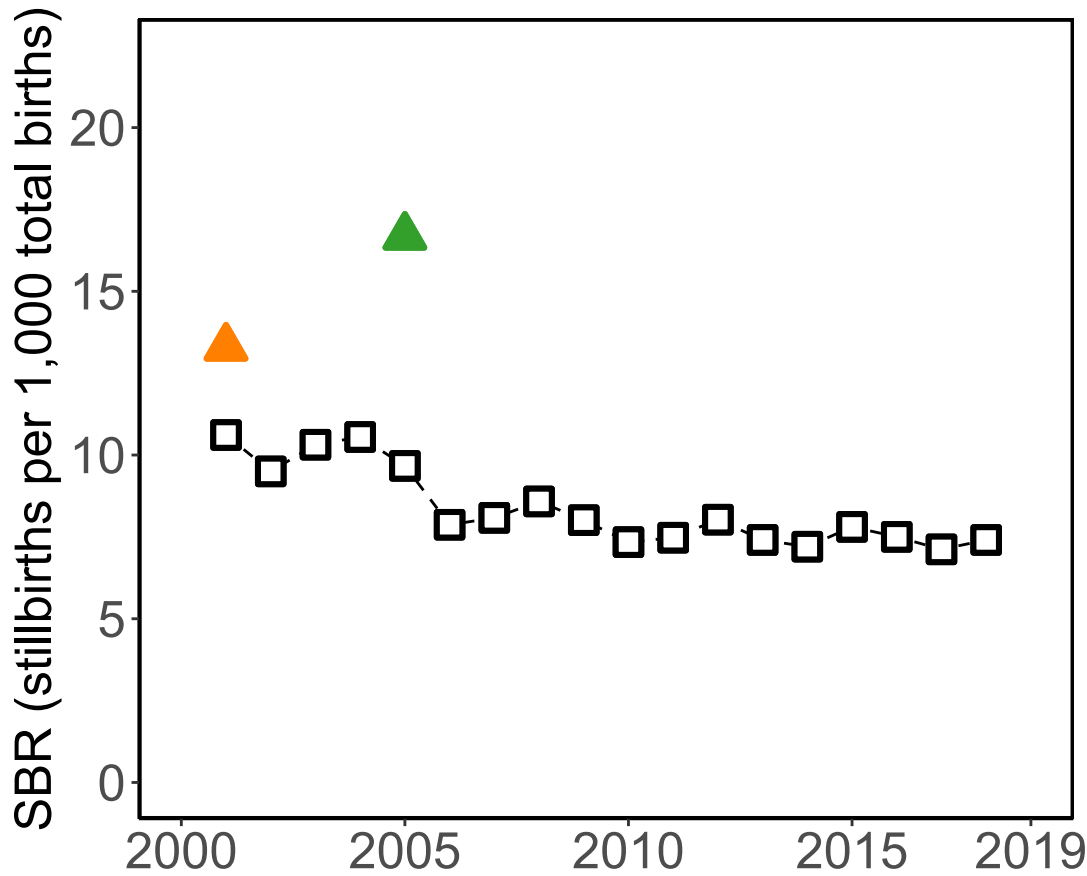

### '28+ Weeks of Gestation' Data (Incl. Adjusted Data)

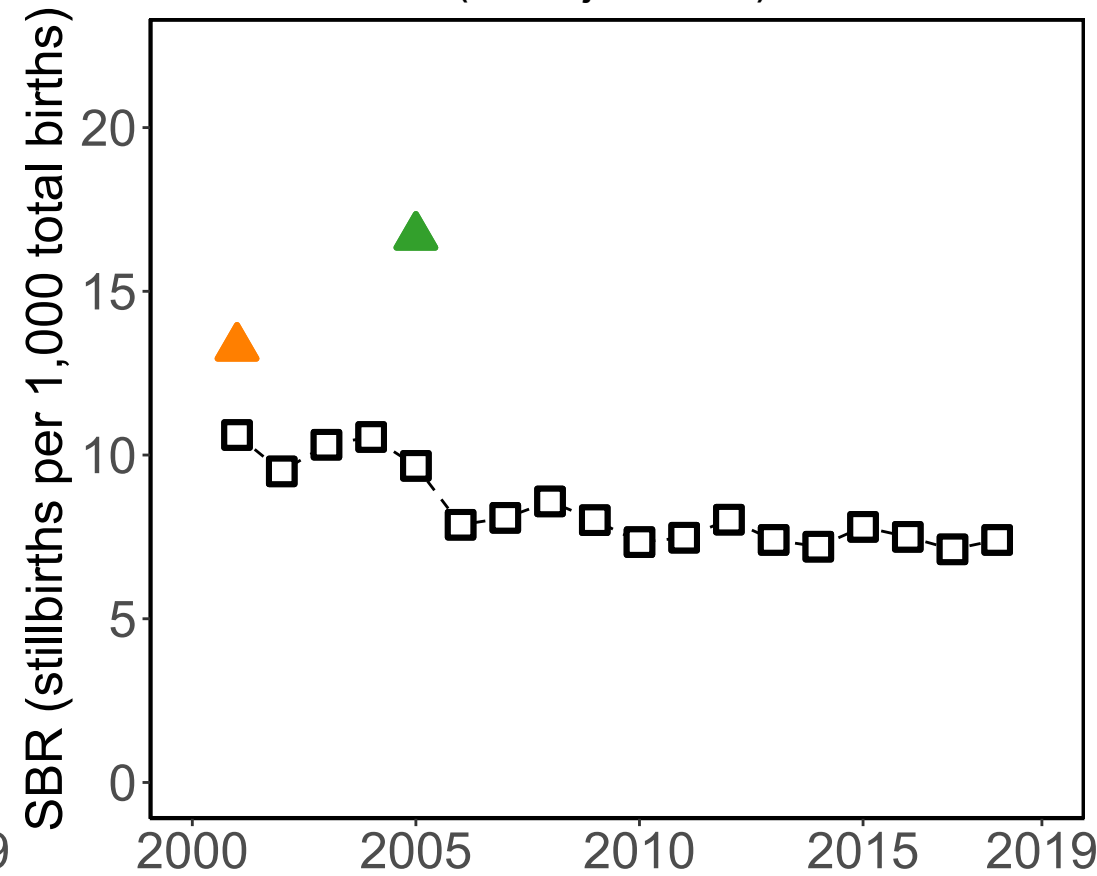

### Data Included in the Model

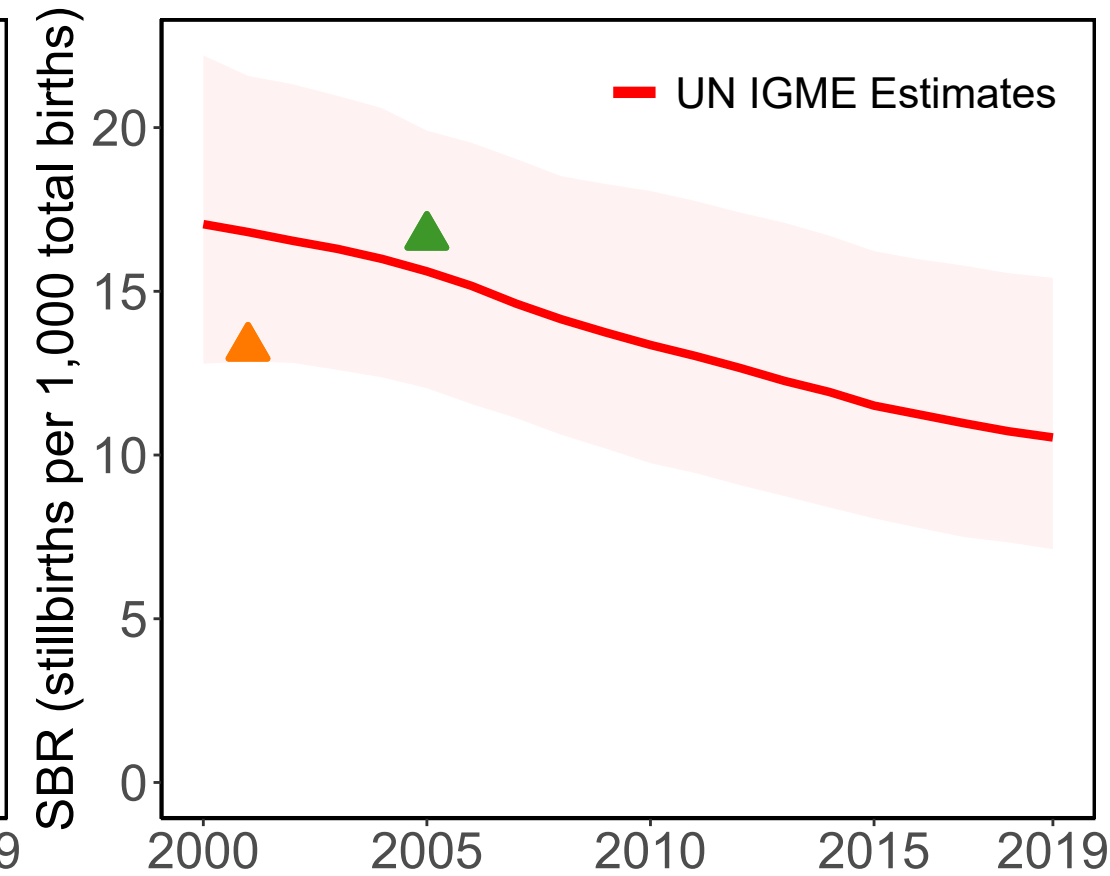

#### Source Types

□ Administrative    △ Survey

#### Data Sources

□ Vital Registration (28wks)

▲ Encuesta Nacional de Demografía y Salud Sexual y Reproductiva 2008 (RHS) (PH) (28wks)

▲ Encuesta Nacional de Demografía y Salud Sexual y Reproductiva 2004 (RHS) (PH) (28wks)

# State of Palestine

## Available Data

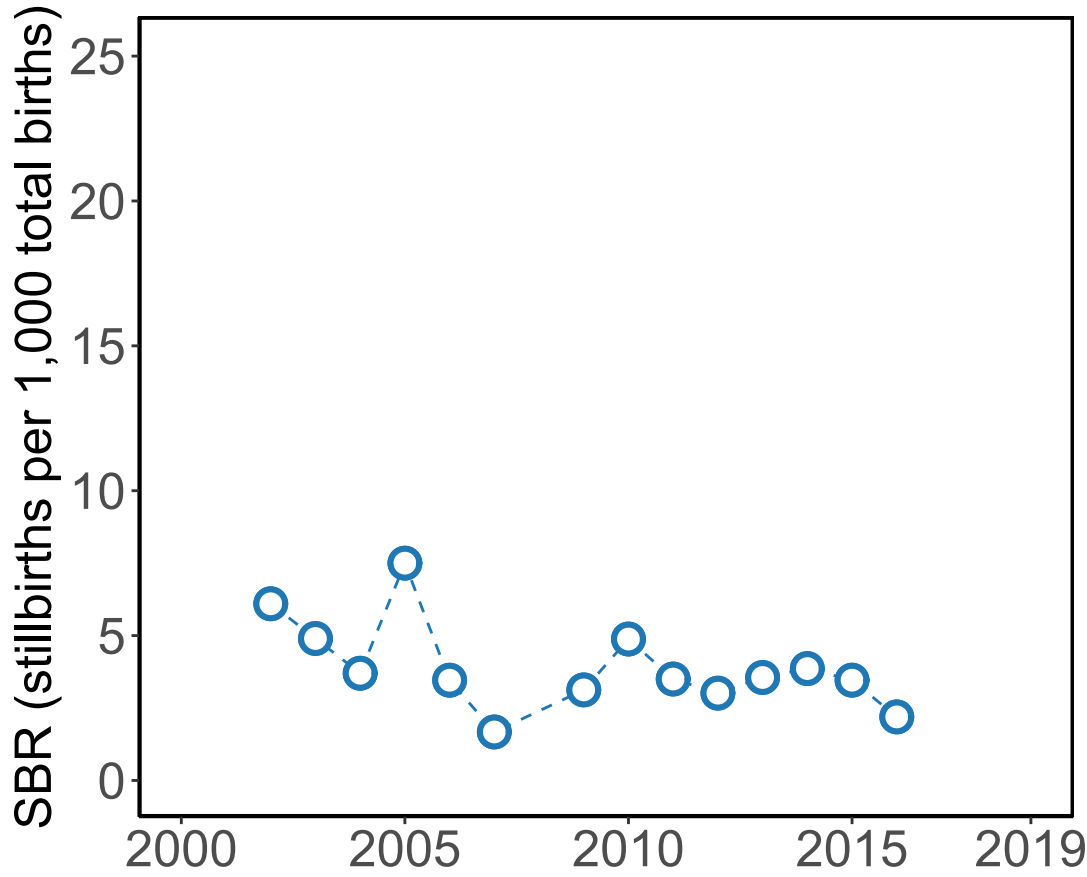

## '28+ Weeks of Gestation' Data (Incl. Adjusted Data)

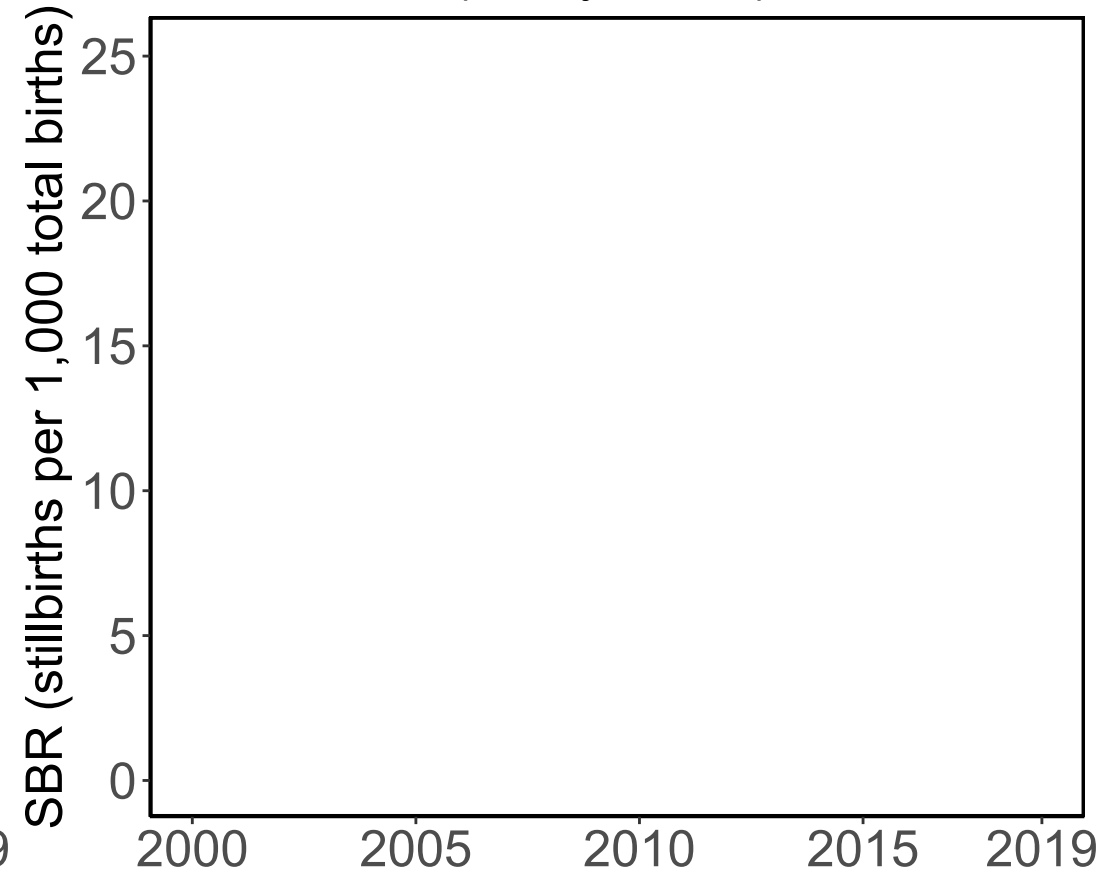

## Data Included in the Model

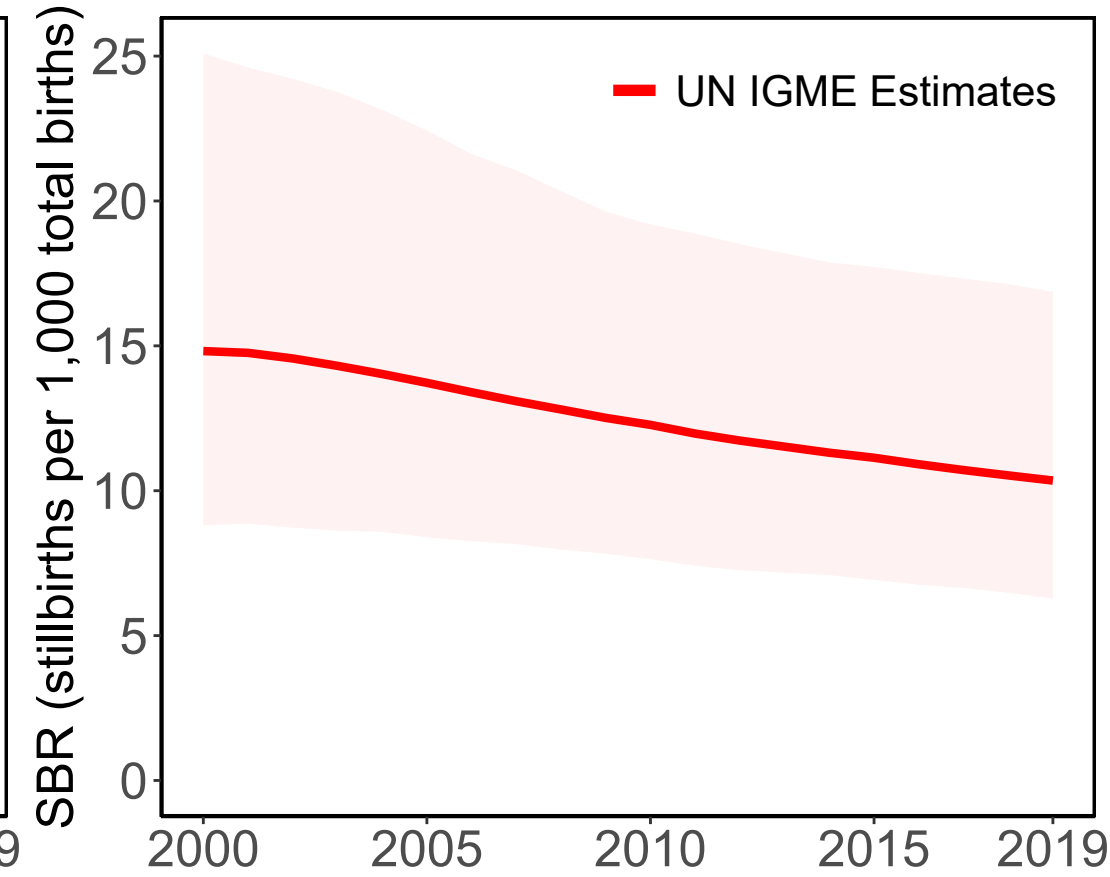

### Source Types



HMIS

### Data Sources

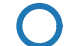

HMIS-DHIS2 (not defined)

# Qatar

### Available Data

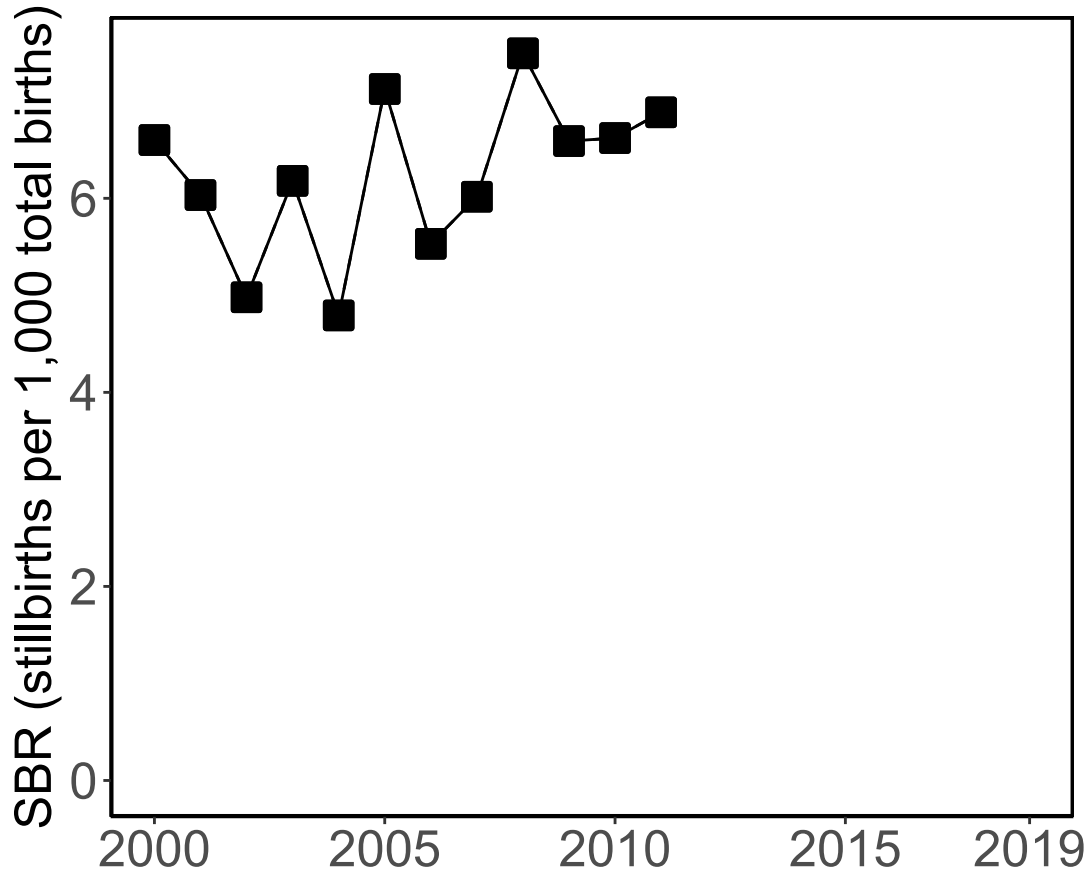

### '28+ Weeks of Gestation' Data (Incl. Adjusted Data)

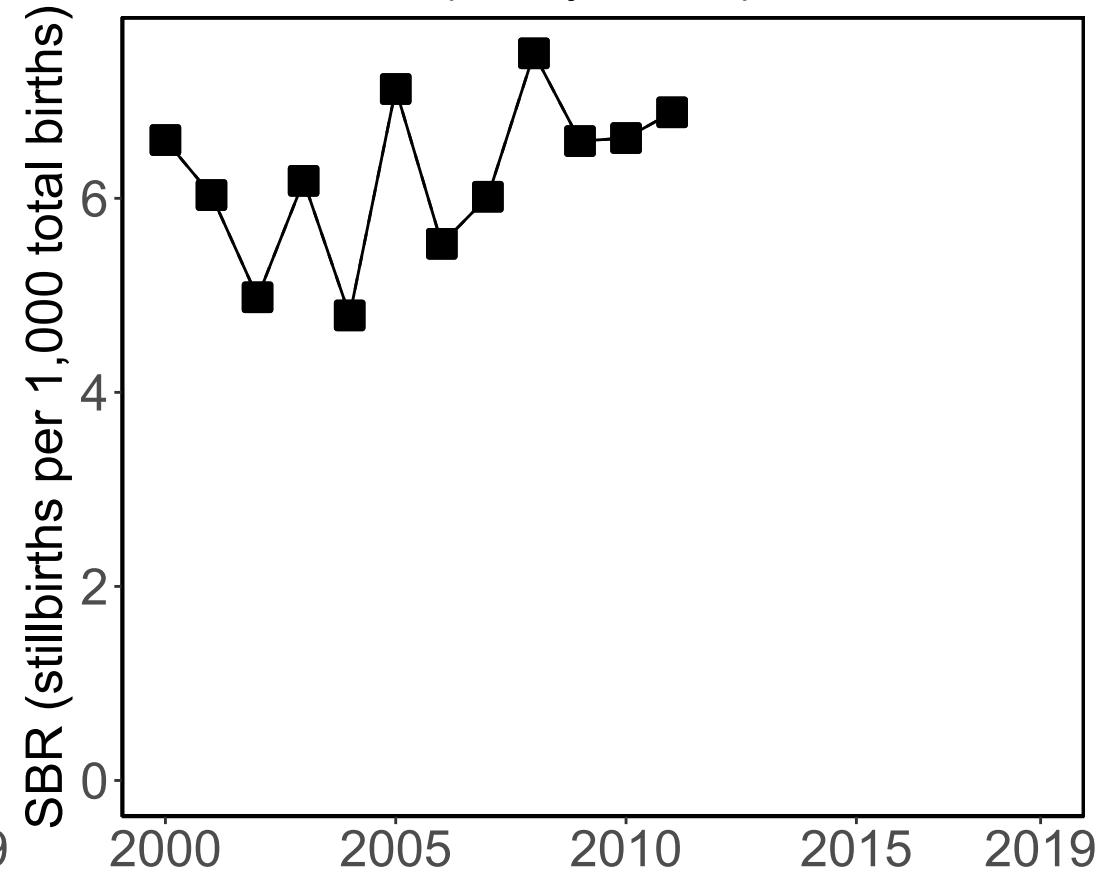

### Data Included in the Model

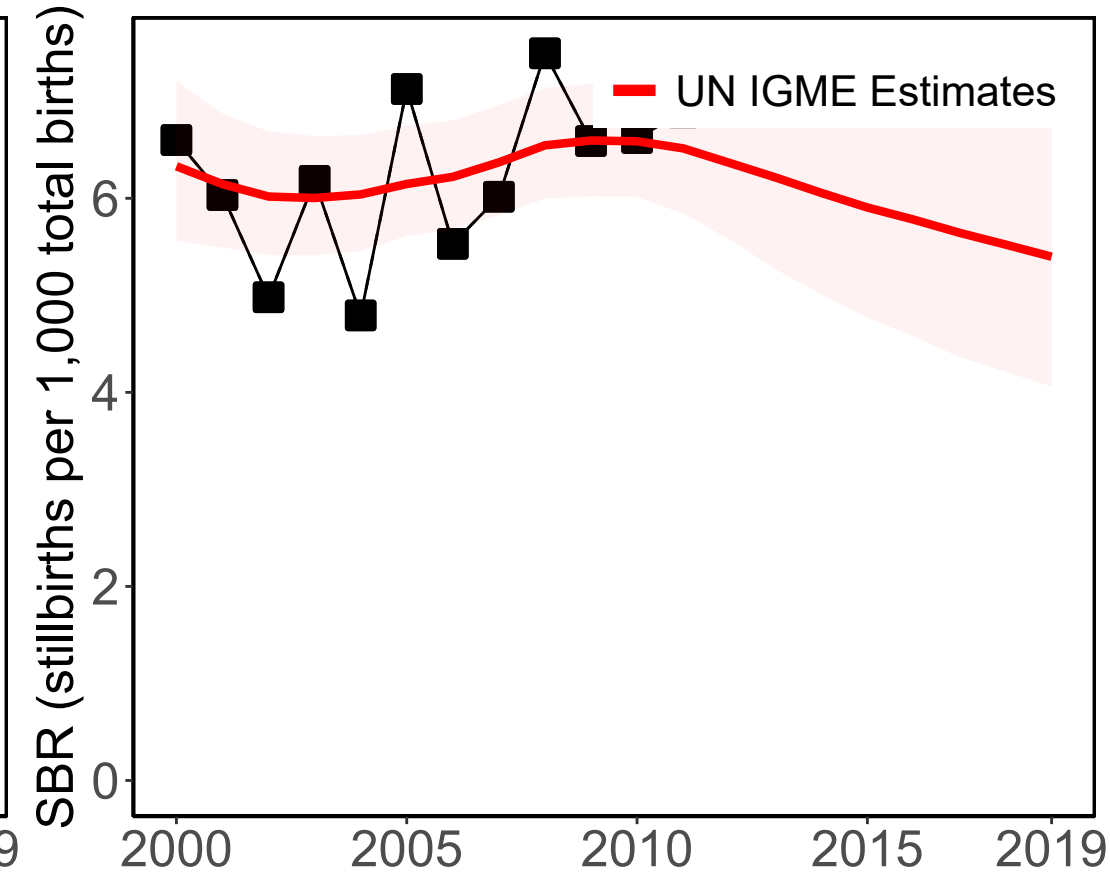

#### Source Types

□ Administrative

#### Data Sources

■ Vital Registration (28wks)

# Romania

### Available Data

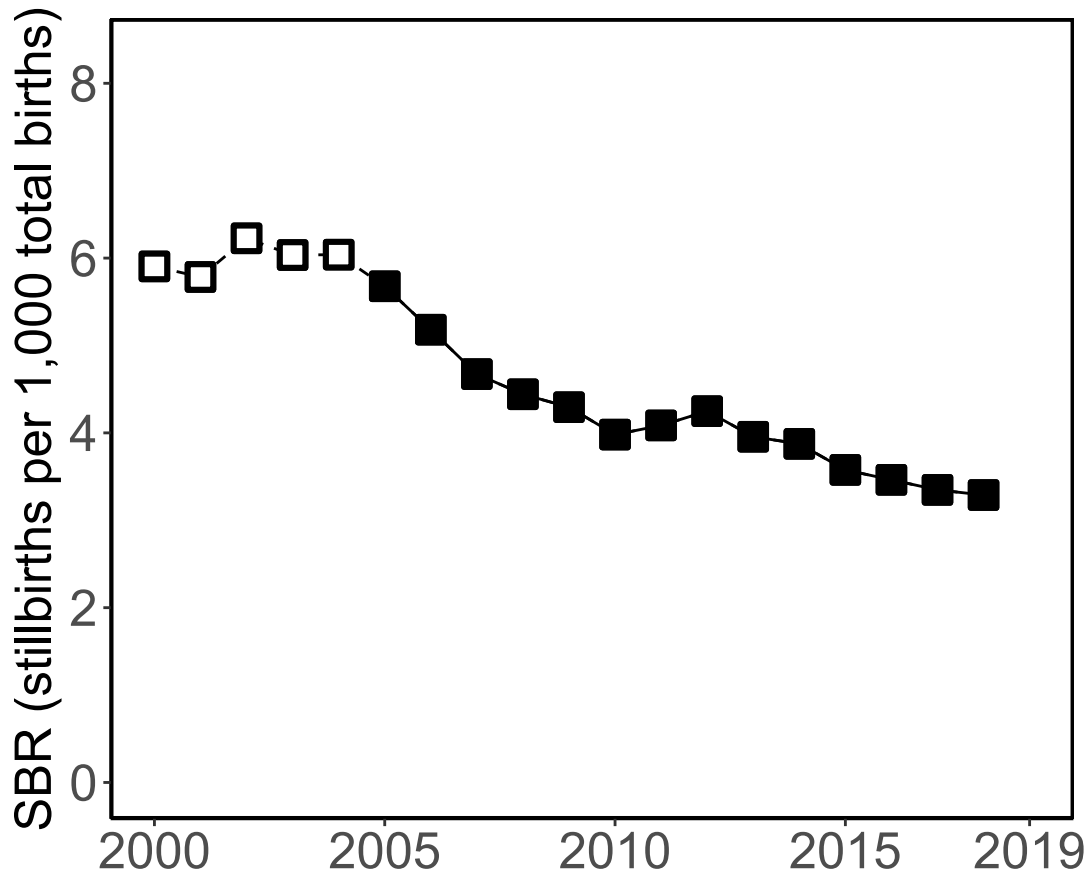

### '28+ Weeks of Gestation' Data (Incl. Adjusted Data)

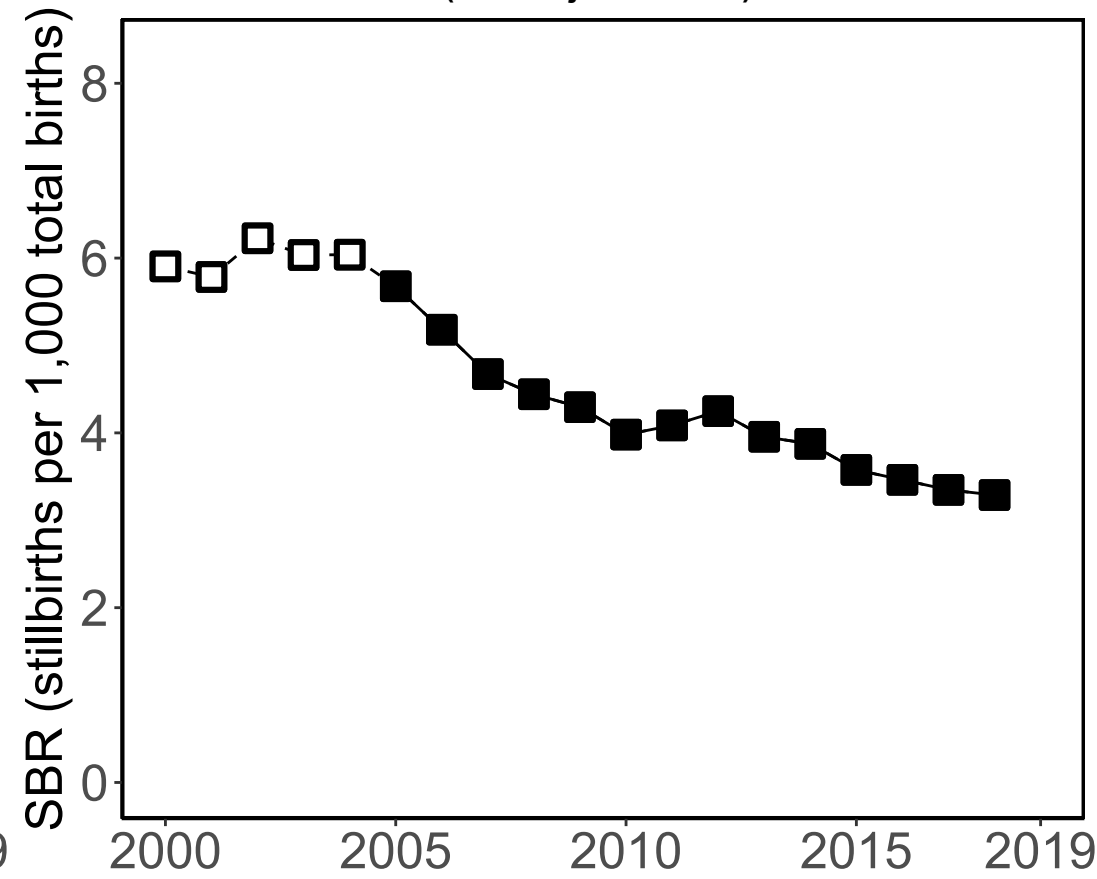

### Data Included in the Model

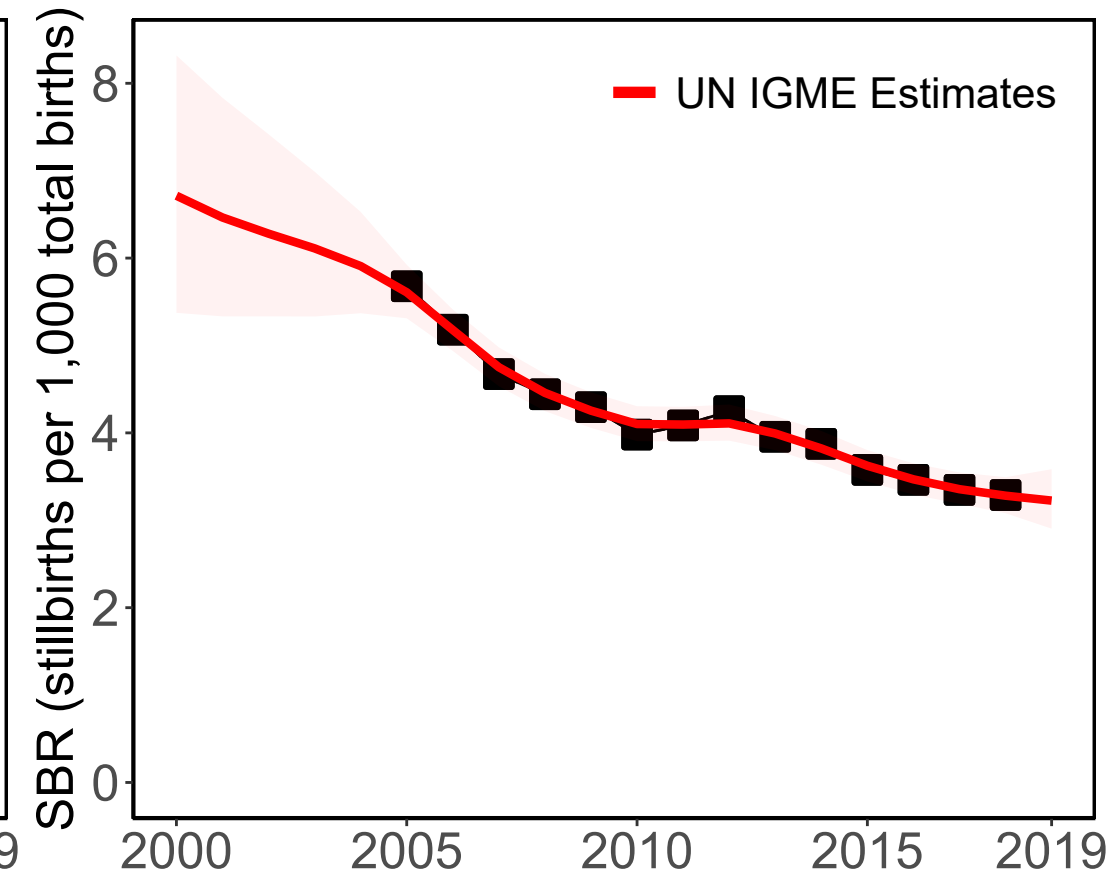

#### Source Types

□ Administrative

#### Data Sources

■ Vital Registration (28wks)

# Russian Federation

### Available Data

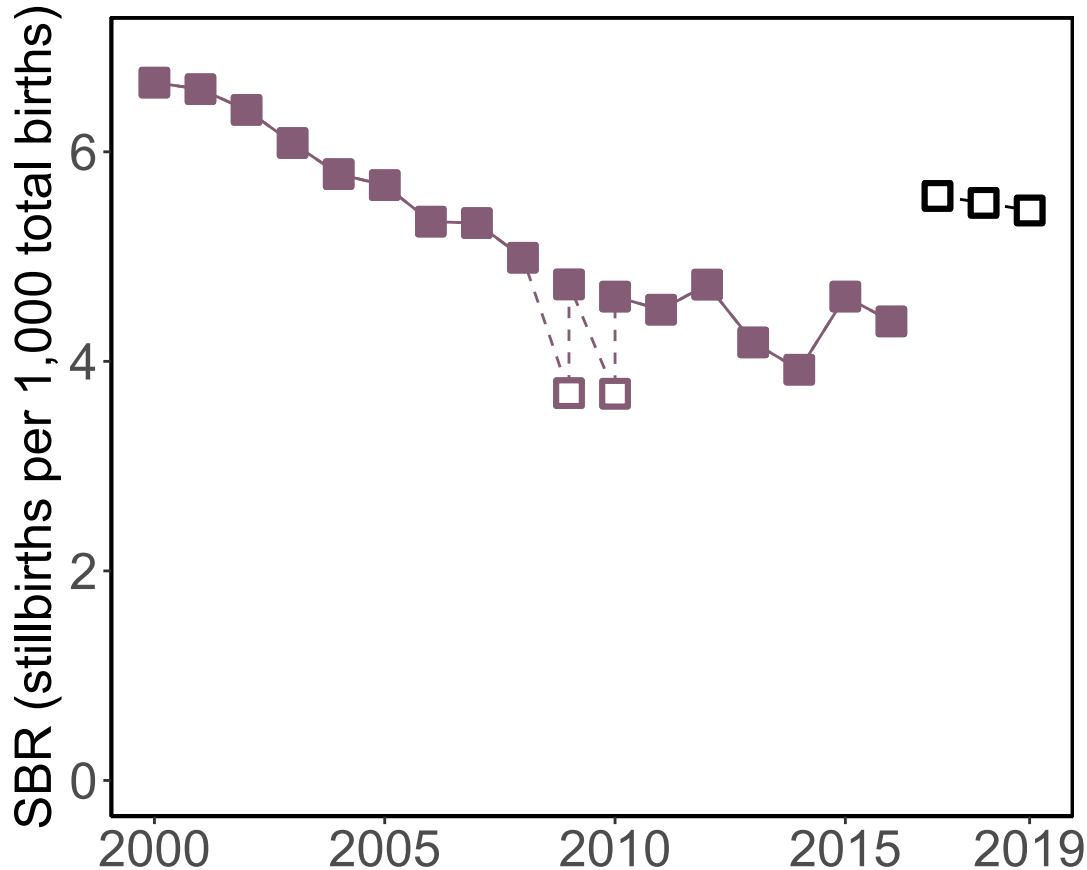

### '28+ Weeks of Gestation' Data (Incl. Adjusted Data)

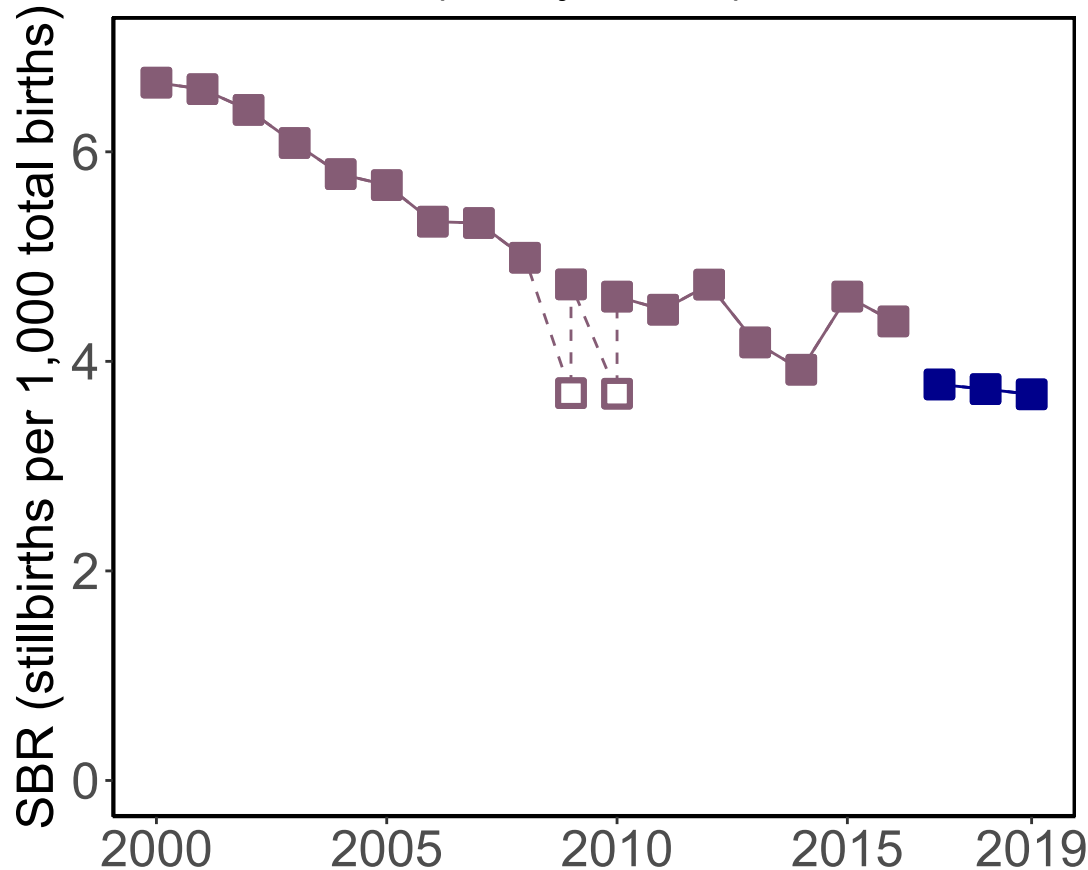

### Data Included in the Model

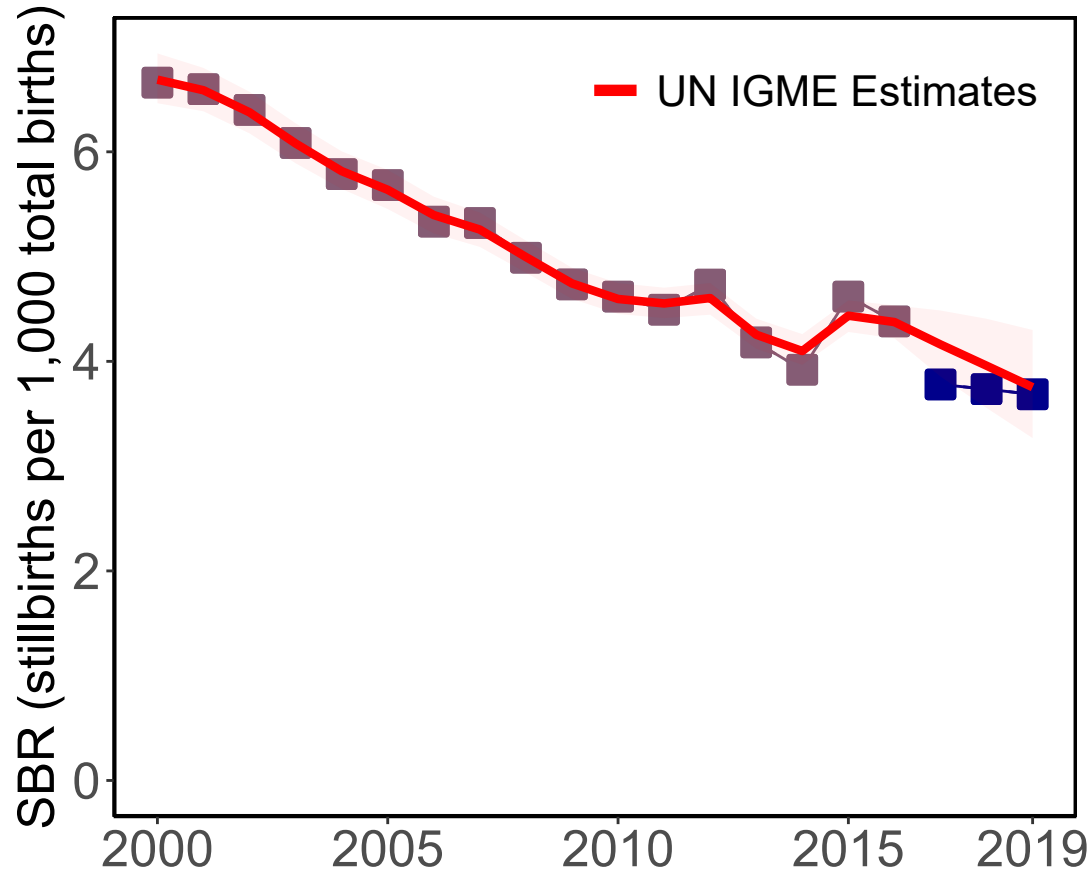

#### Source Types

□ Administrative

#### Data Sources

□ Vital Registration (22wks)

■ Vital Registration (28wks adj from 22wks)

■ Vital Registration (28wks)



# Rwanda

Available Data

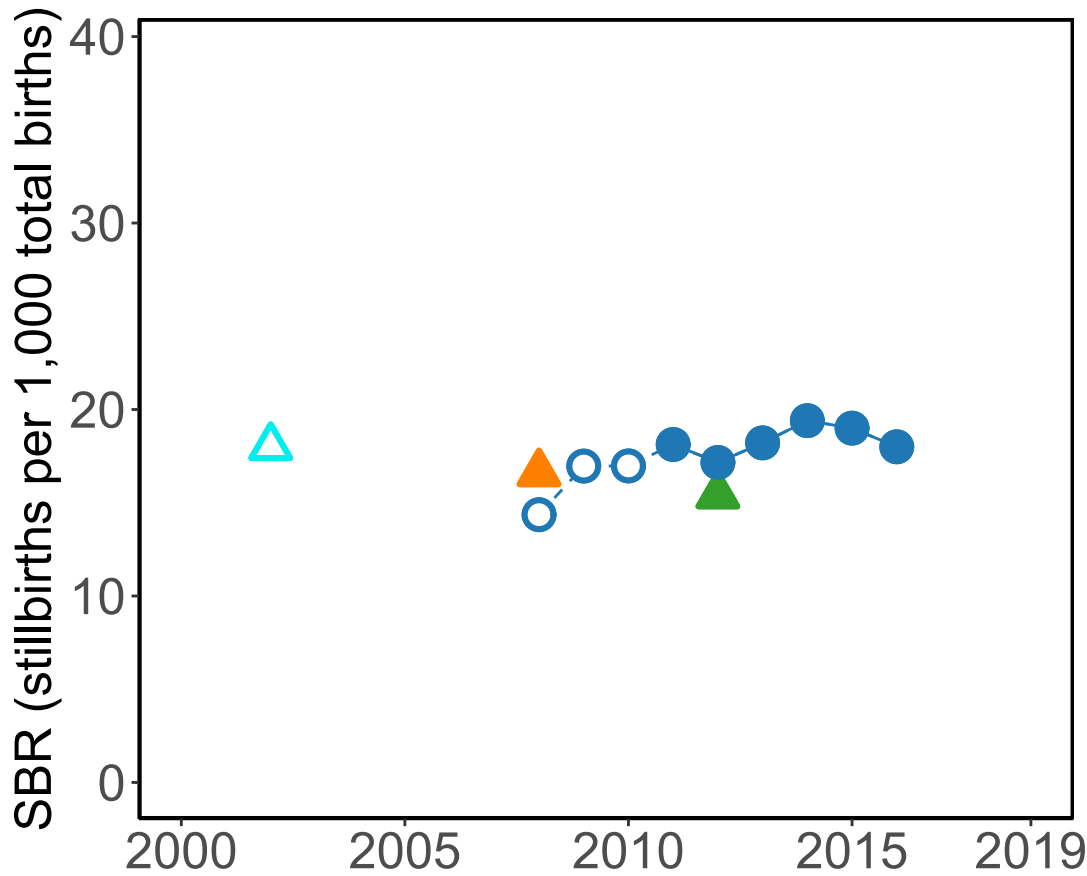

'28+ Weeks of Gestation' Data  
(Incl. Adjusted Data)

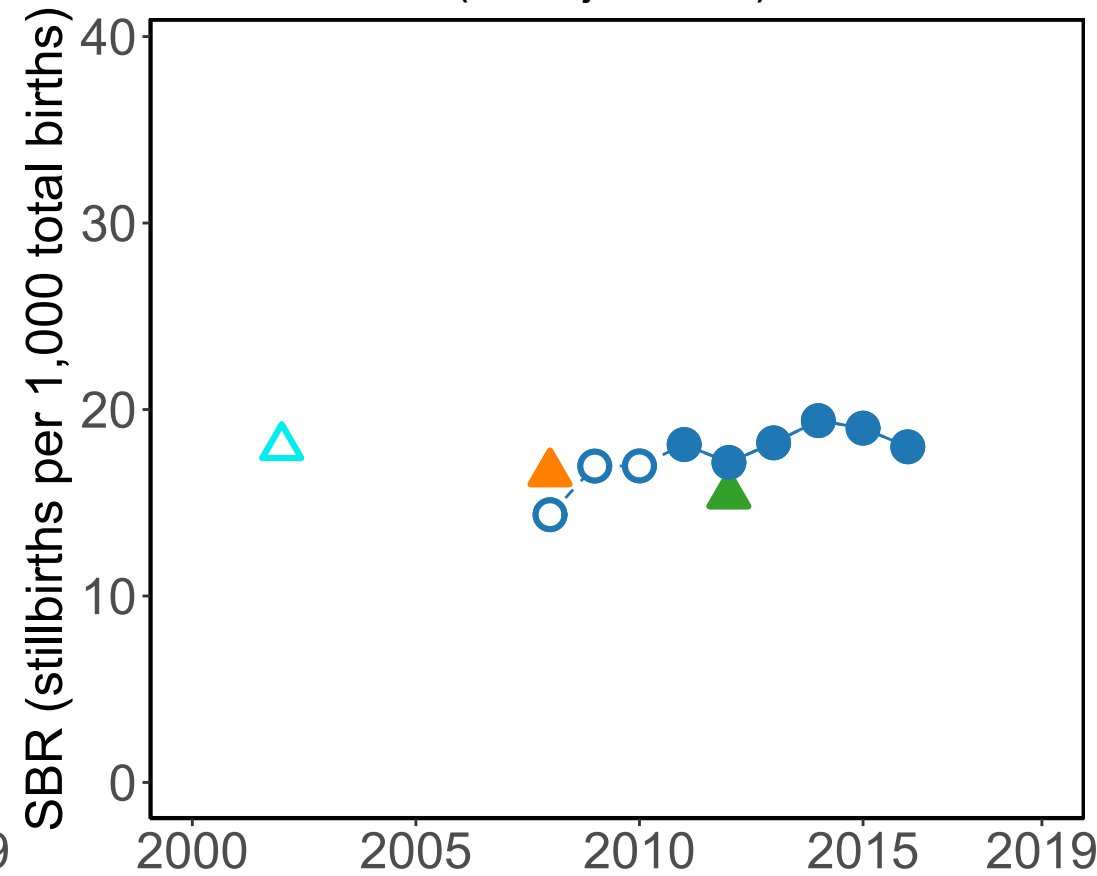

Data Included in the Model

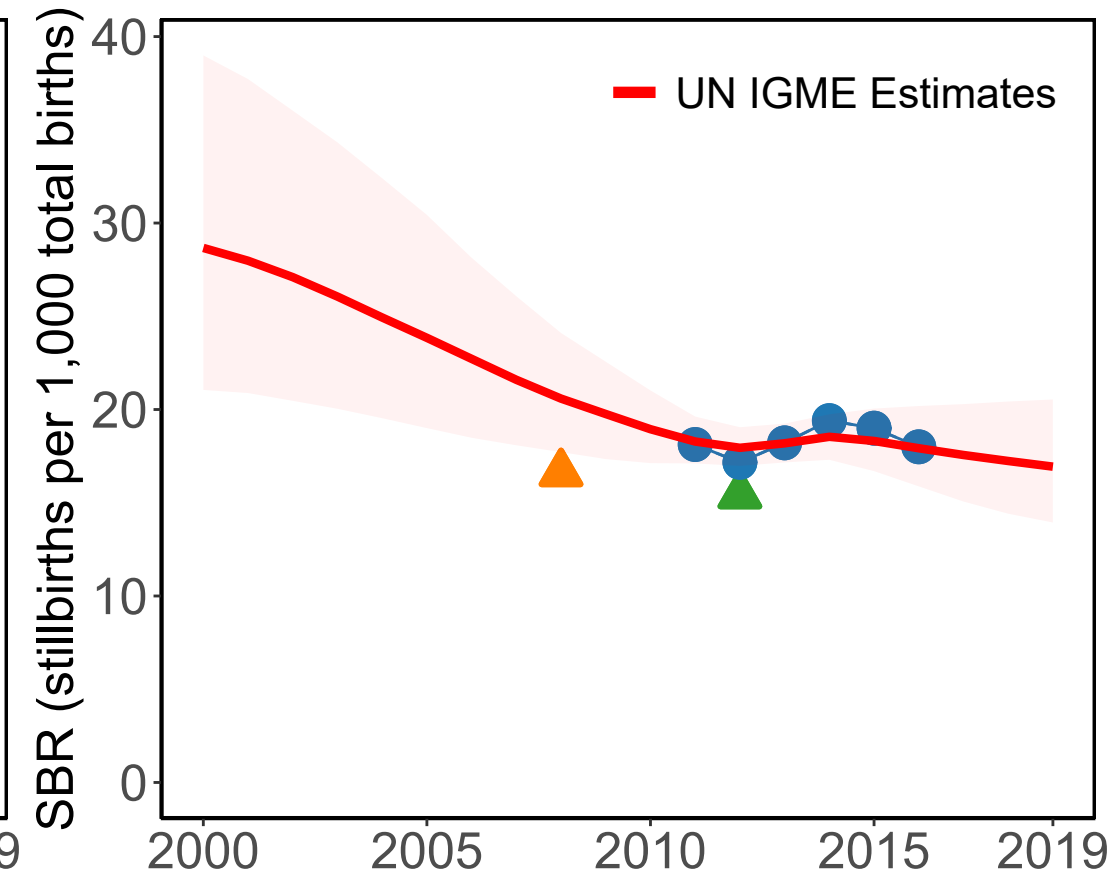

Source Types

○ HMIS △ Survey

Data Sources

● HMIS-DHIS2 (28wks)

▲ Demographic and Health Survey 2014-15 (DHS) (RC) (28wks)

▲ Demographic and Health Survey 2010 (DHS) (RC) (28wks)

△ Enquête démographique et de santé 2005 (DHS) (RC) (28wks)

# Saudi Arabia

Available Data

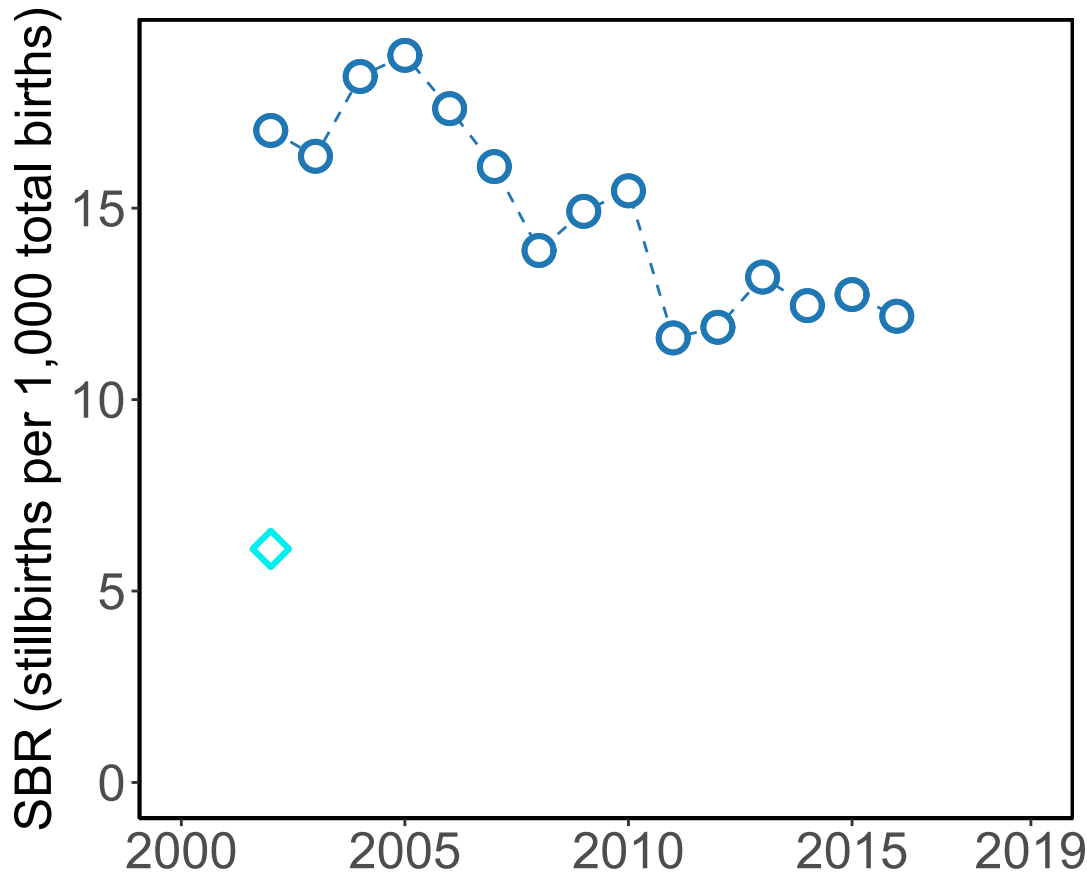

'28+ Weeks of Gestation' Data  
(Incl. Adjusted Data)

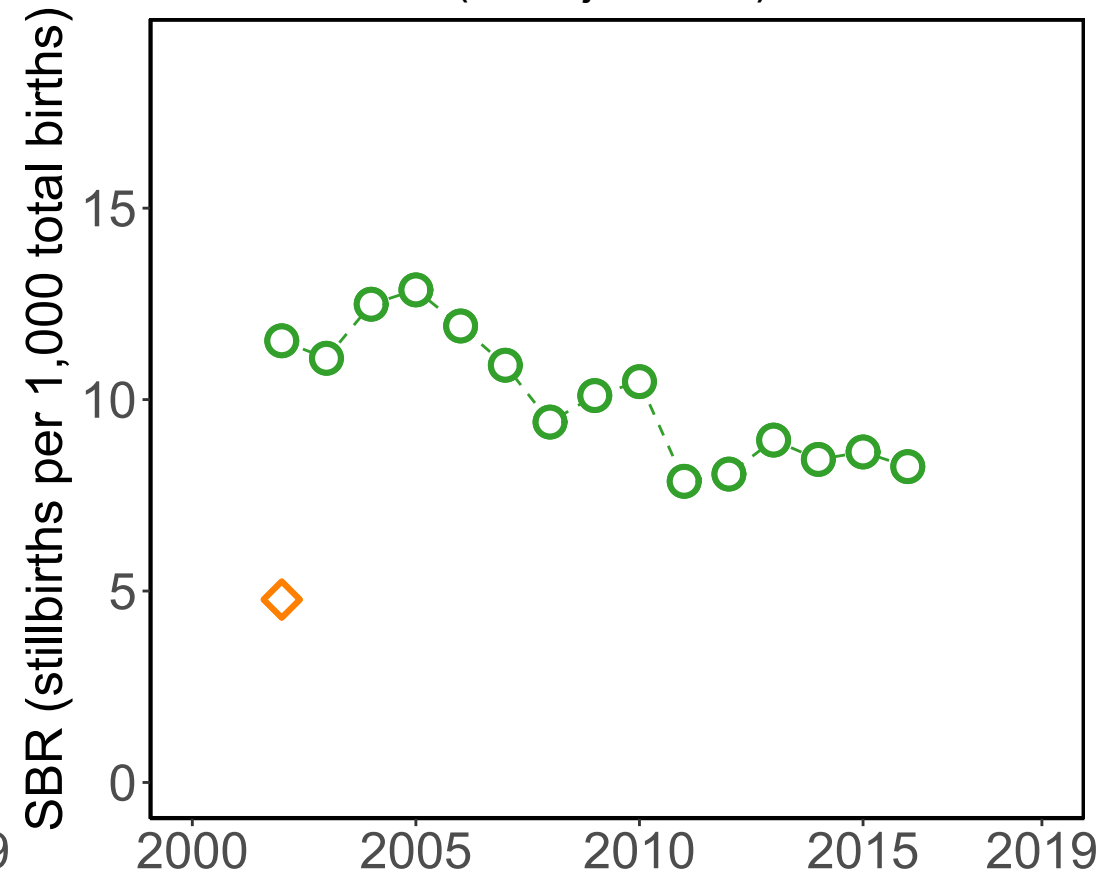

Data Included in the Model

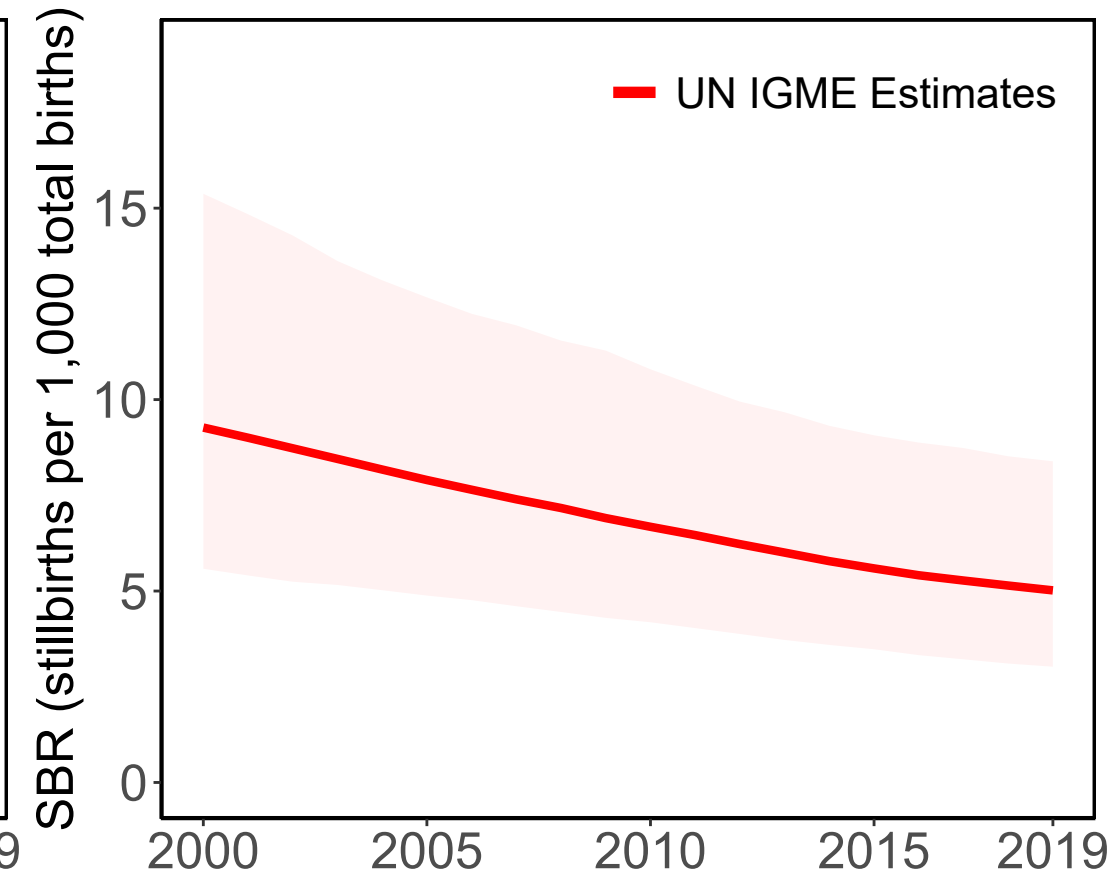

Source Types

- HMIS
- ◇ Population study

Data Sources

- HMIS-DHIS2 (22wks)
- HMIS-DHIS2 (28wks adj from 22wks)
- ◇ Khashoggi 2005 (28wks adj from 500g)
- ◇ Khashoggi 2005 (500g)

# Sudan

### Available Data

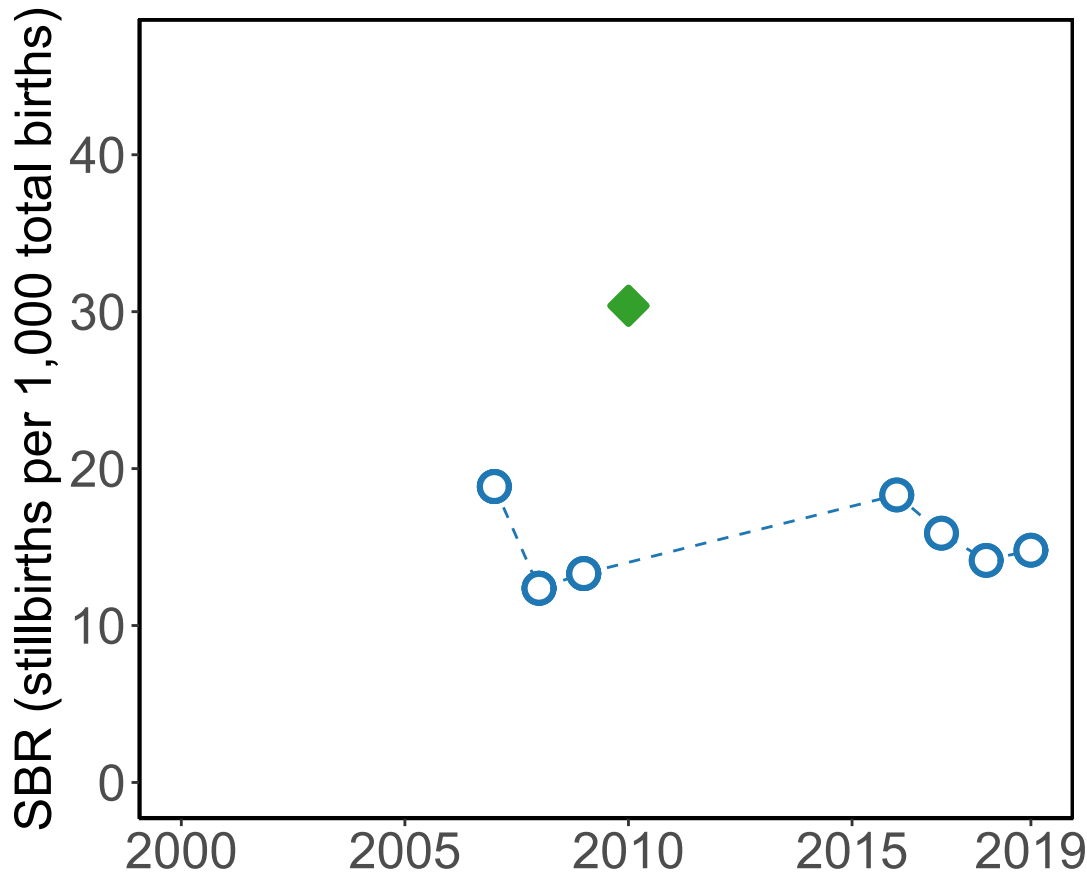

### '28+ Weeks of Gestation' Data (Incl. Adjusted Data)

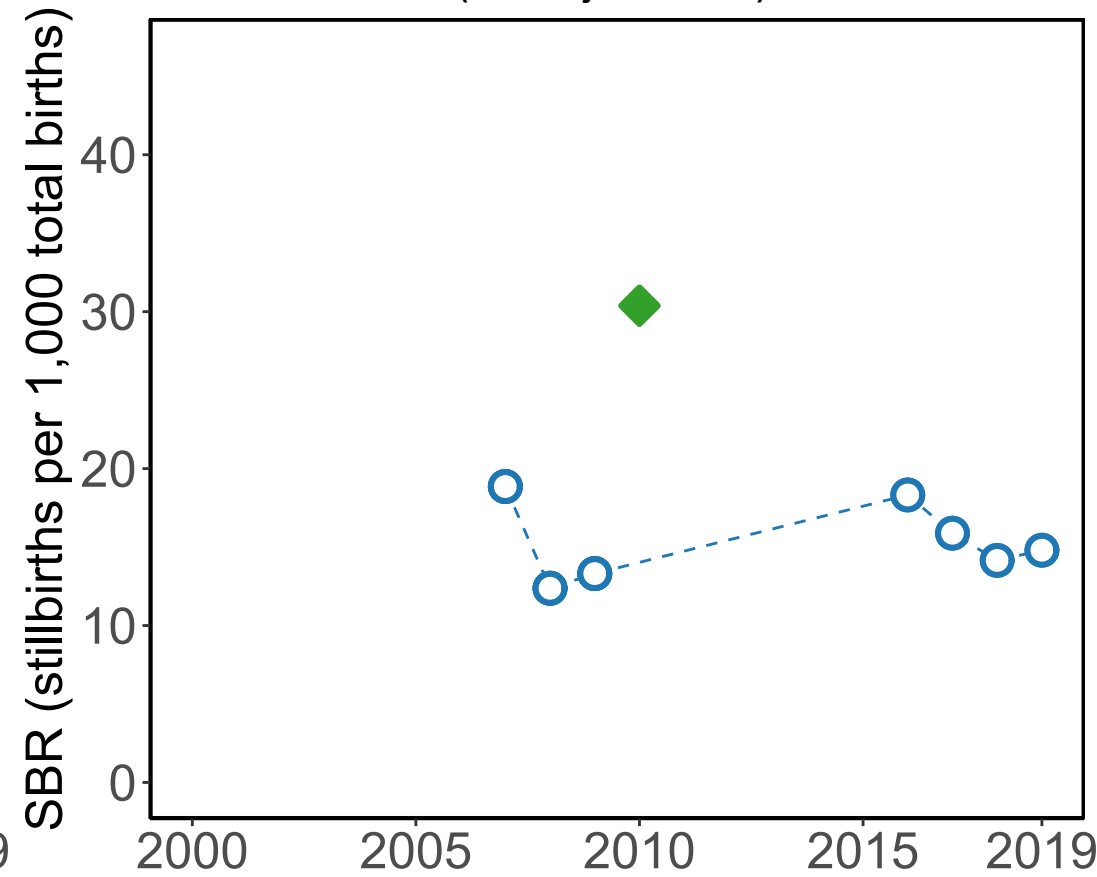

### Data Included in the Model

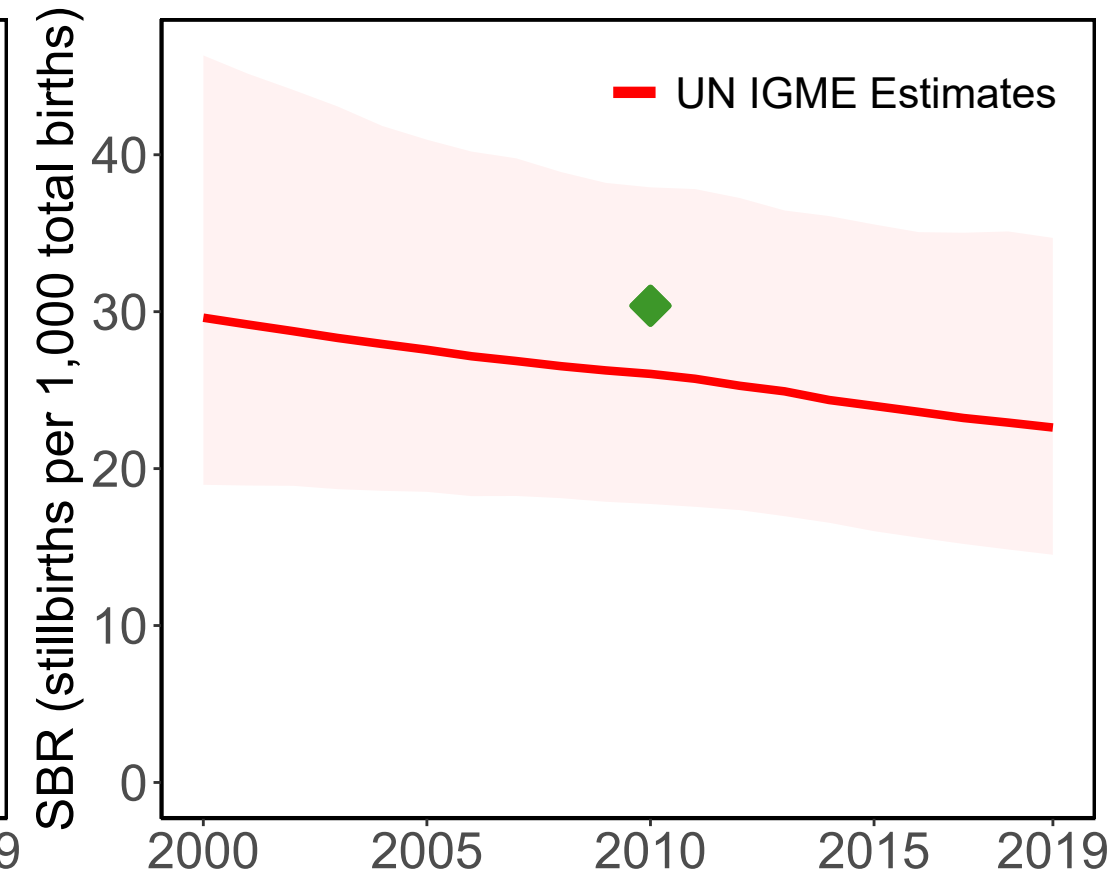

#### Source Types

○ HMIS ◊ Population study

#### Data Sources

○ HMIS-DHIS2 (28wks) ◊ Ali 2014 (28wks)

# Senegal

Available Data

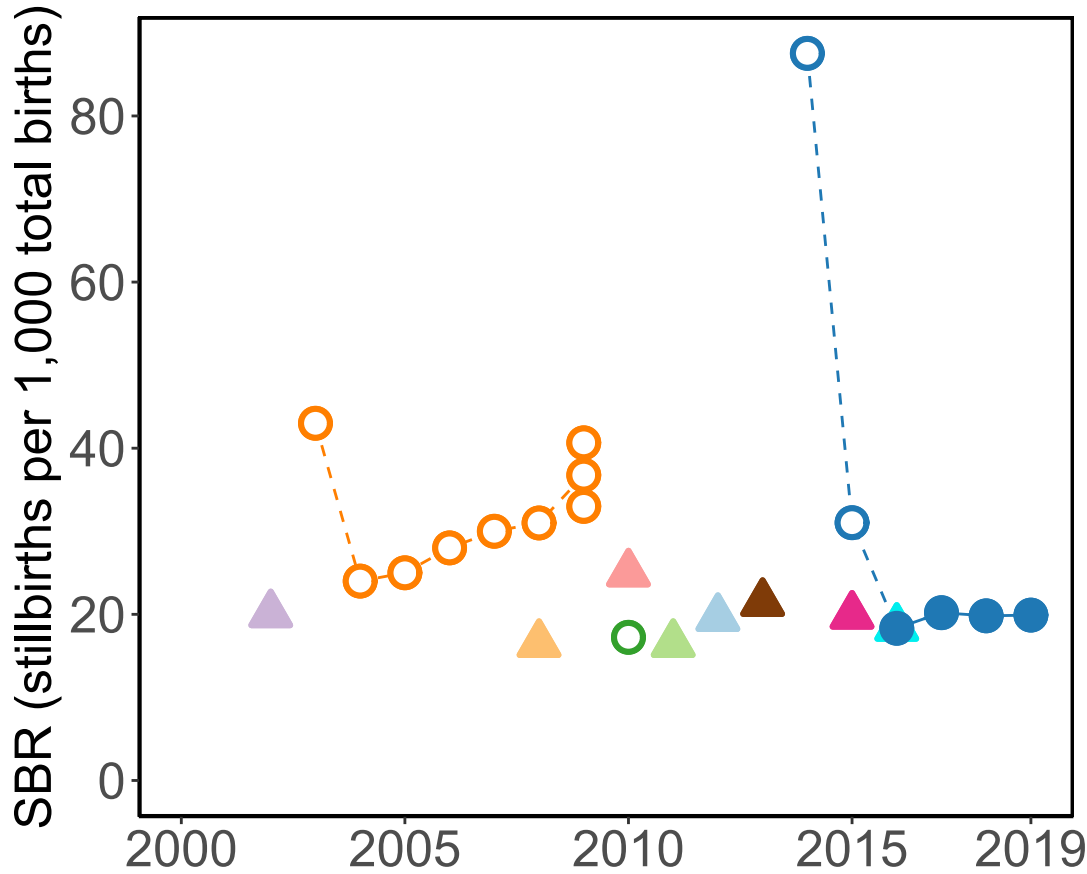

'28+ Weeks of Gestation' Data  
(Incl. Adjusted Data)

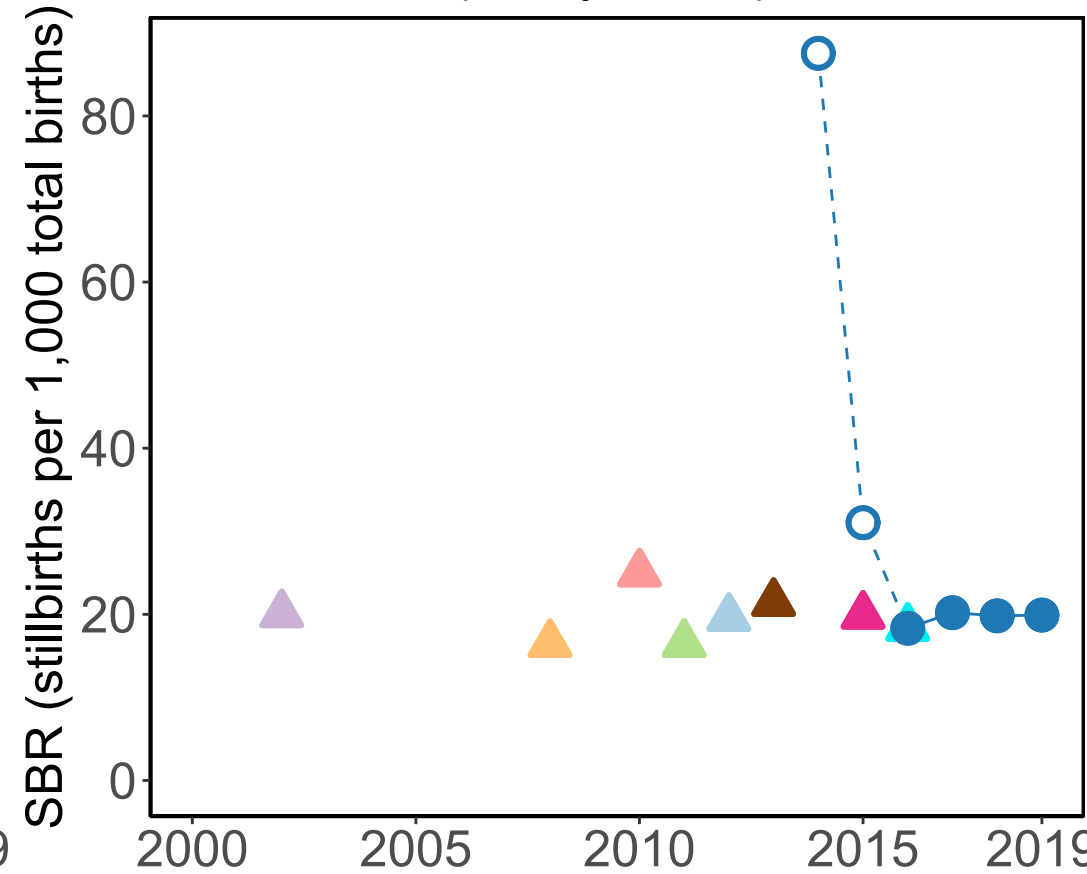

Data Included in the Model

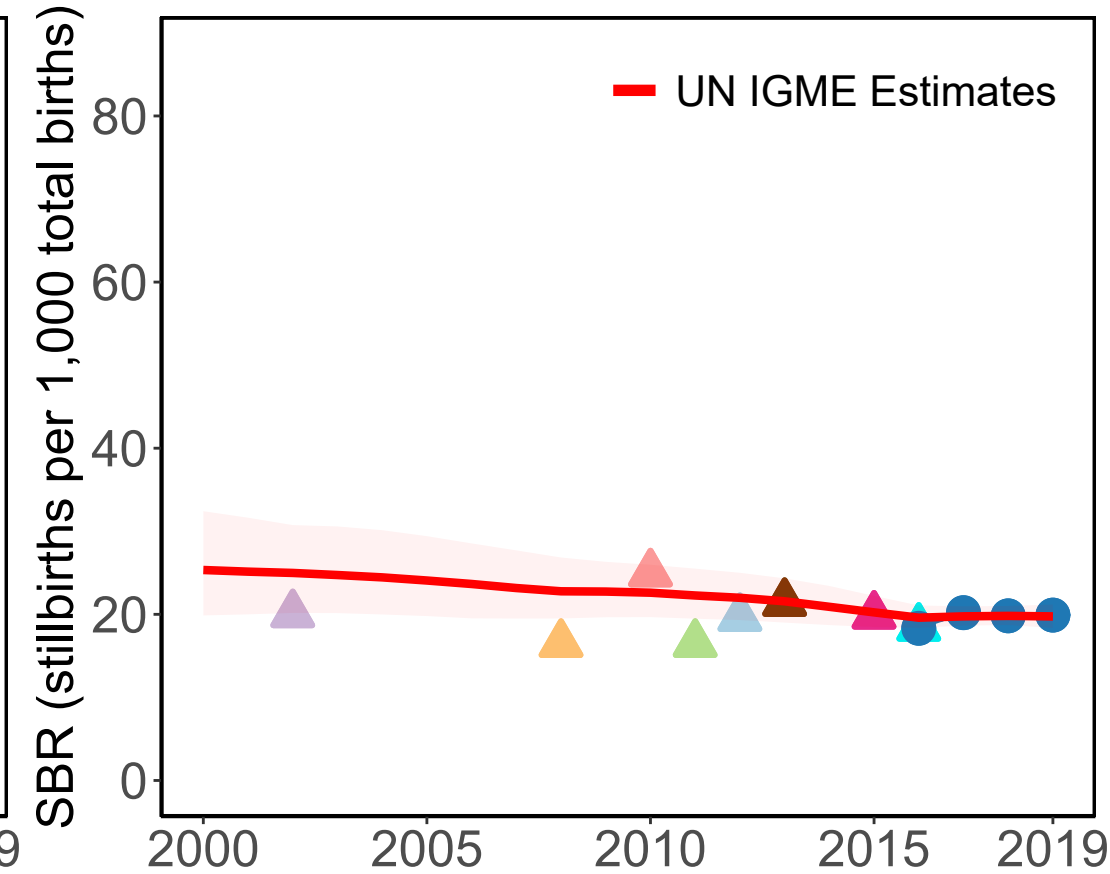

Source Types

○ HMIS △ Survey

Data Sources

- HMIS-DHIS2 (28wks)
- HMIS-DHIS2 (1000g)
- HMIS-DHIS2 (not defined)

- ▲ Demographic Health Survey 2018 (DHS) (RC)
- ▲ Enquête Démographique et de Santé Continue 2017 (DHS) (RC) (28wks)
- ▲ Enquête Démographique et de Santé Continue 2016 (DHS) (RC) (28wks)
- ▲ Enquête Démographique et de Santé Continue 2015 (DHS) (RC) (28wks)
- ▲ Enquête Démographique et de Santé Continue 2014 (DHS) (RC) (28wks)
- ▲ Enquête Démographique et de Santé Continue 2012-13 (DHS) (RC) (28wks)
- ▲ Enquête démographique et de santé à indicateurs multiples 2010-11 (DHS) (RC) (28wks)
- ▲ Enquête démographique et de santé 2005 (DHS) (RC) (28wks)

# Singapore

### Available Data

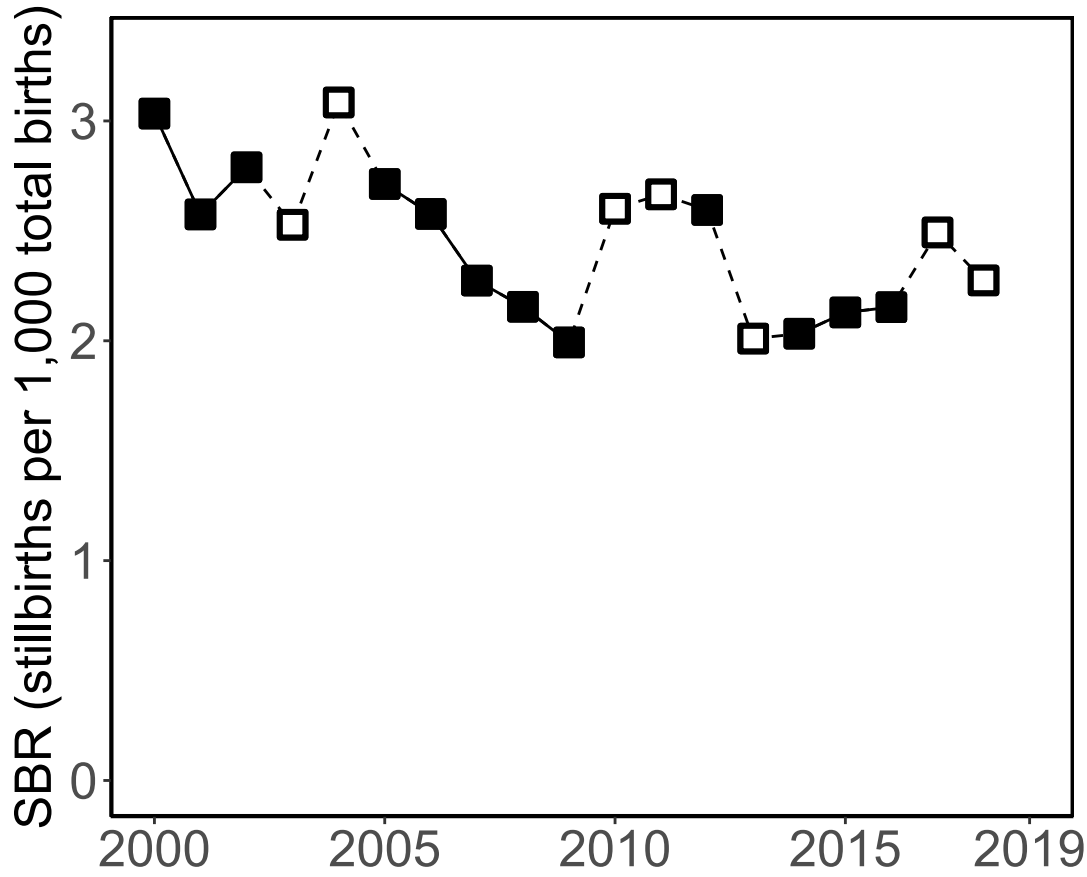

### '28+ Weeks of Gestation' Data (Incl. Adjusted Data)

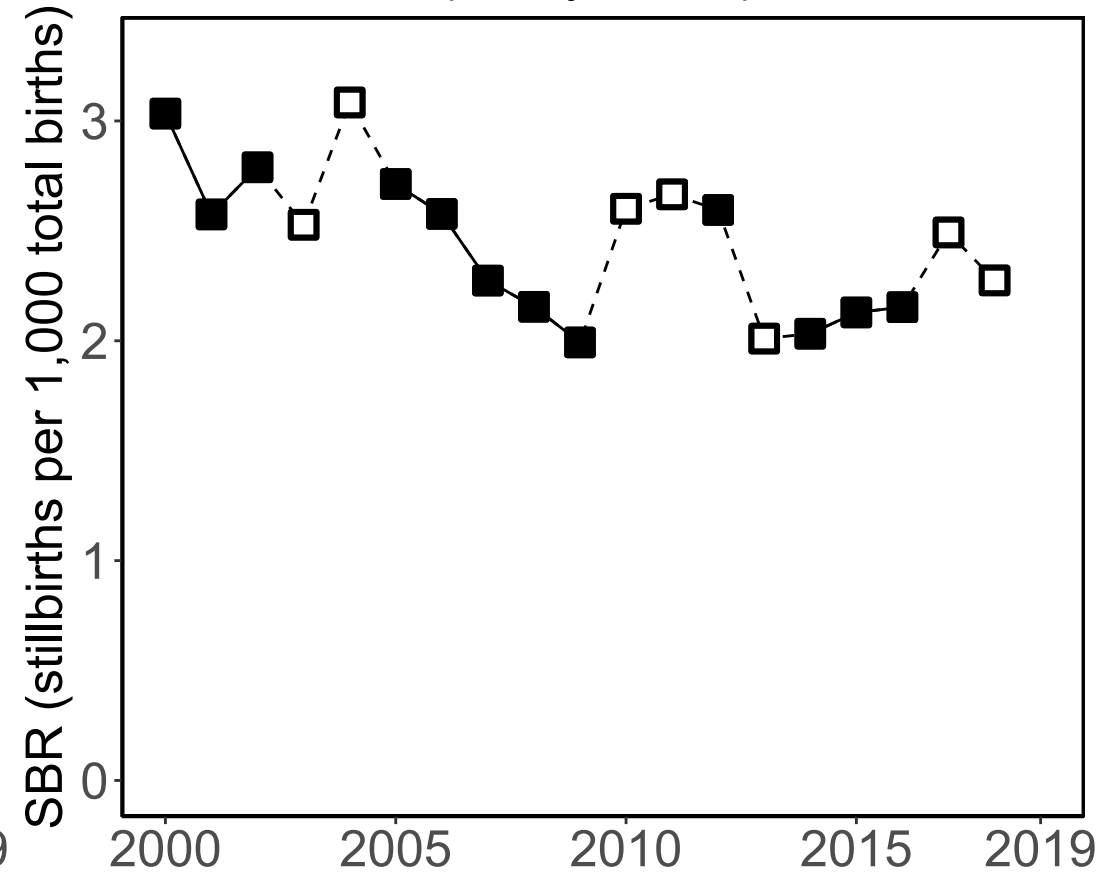

### Data Included in the Model

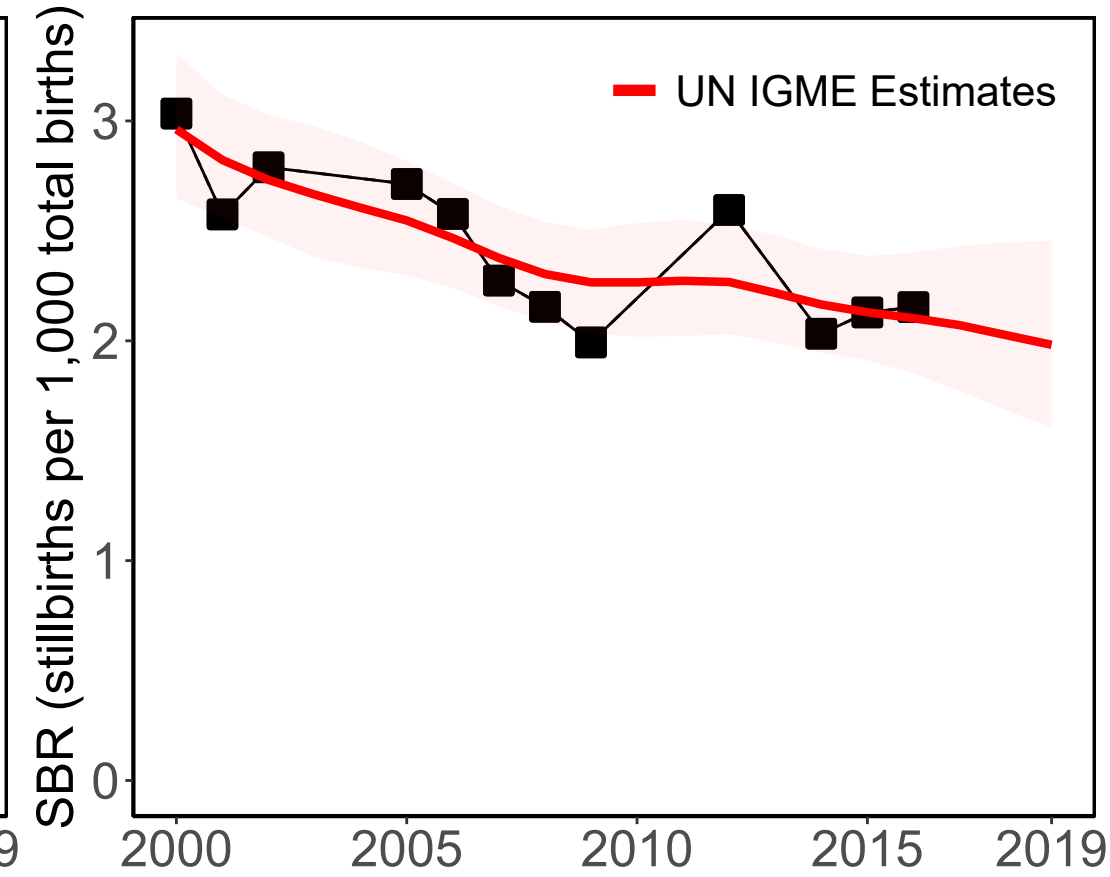

#### Source Types

□ Administrative

#### Data Sources

■ Vital Registration (28wks)

# Solomon Islands

Available Data

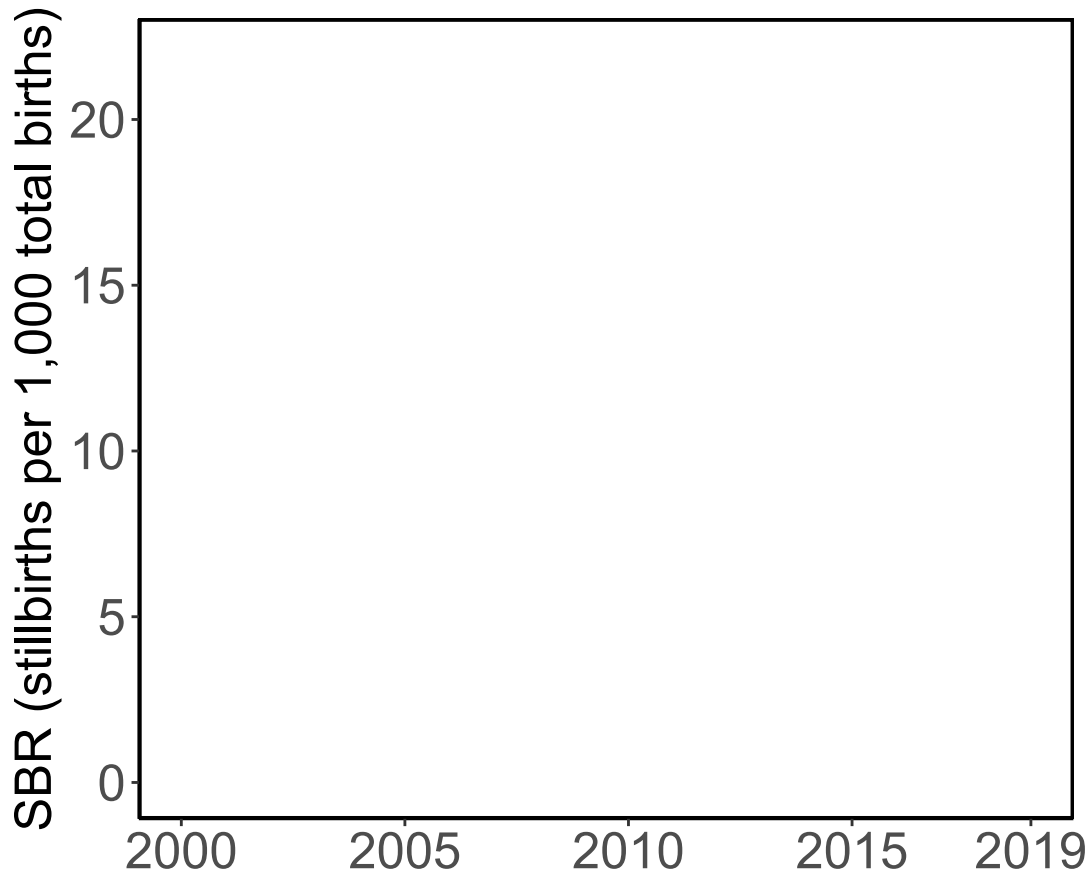

'28+ Weeks of Gestation' Data  
(Incl. Adjusted Data)

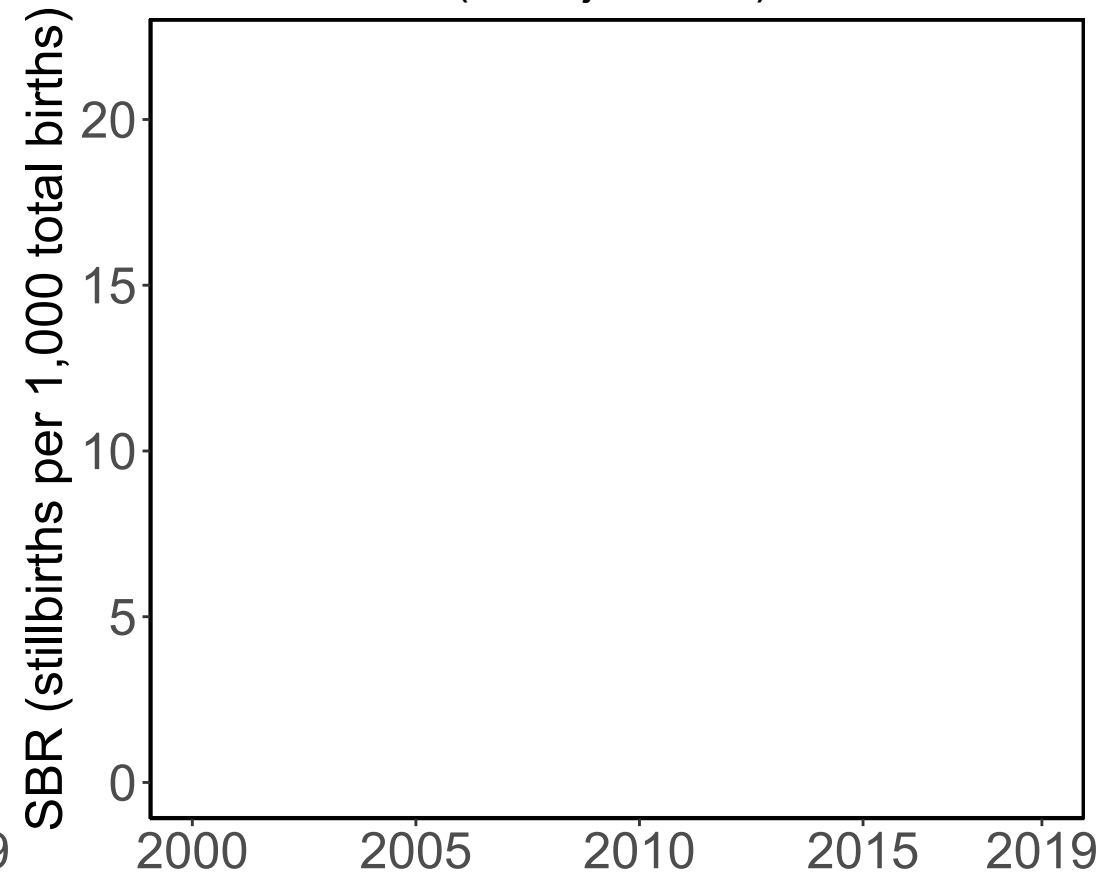

Data Included in the Model

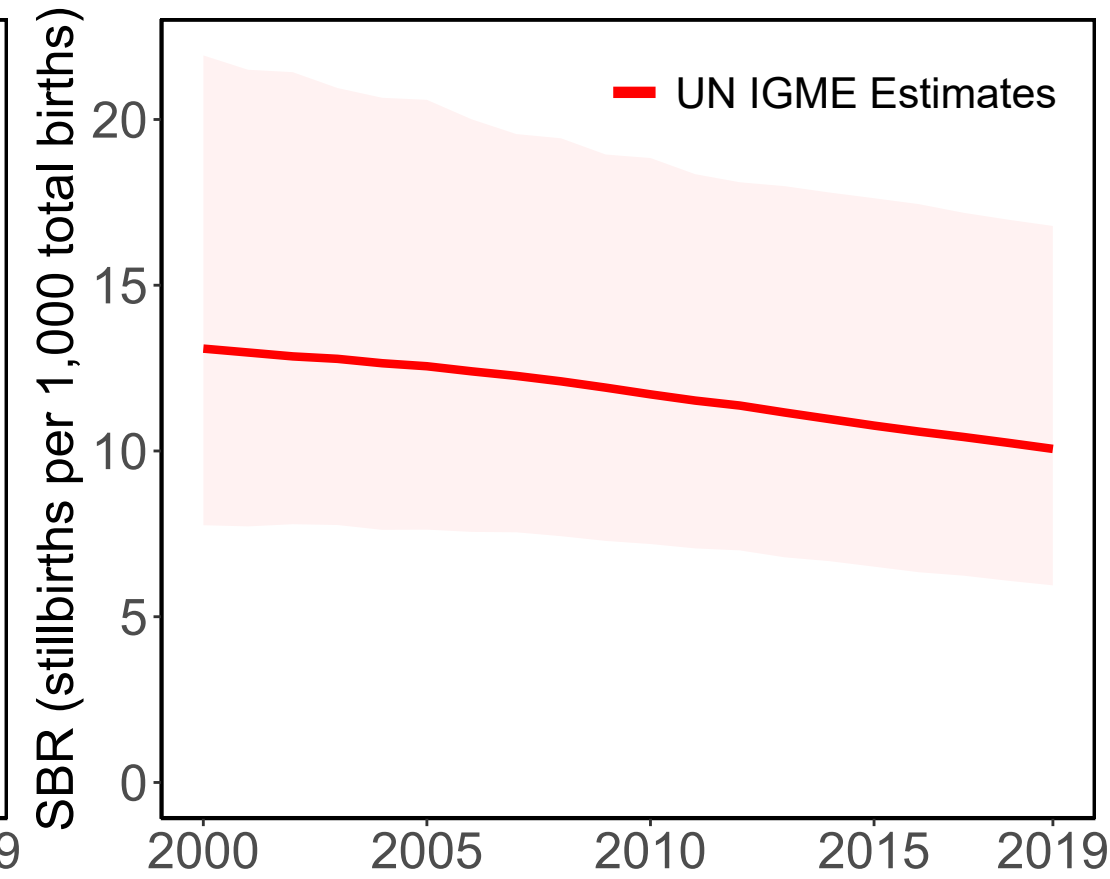

# Sierra Leone

### Available Data

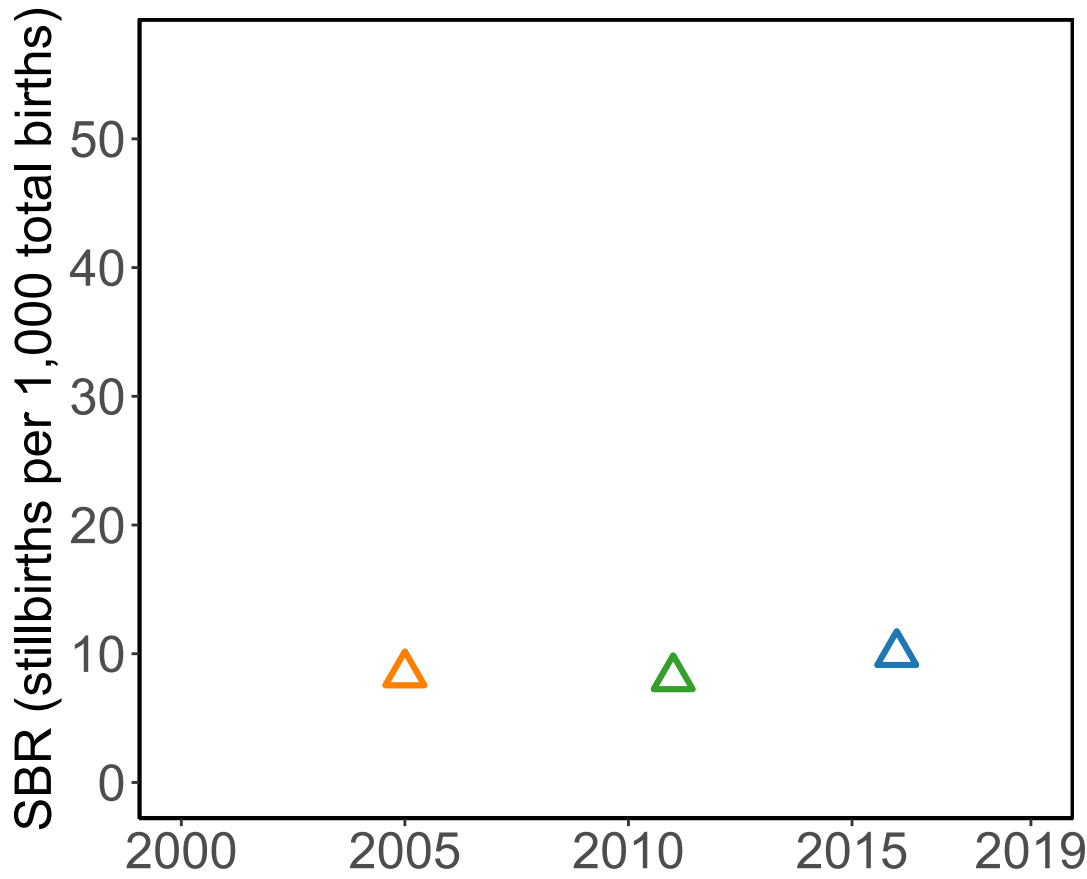

### '28+ Weeks of Gestation' Data (Incl. Adjusted Data)

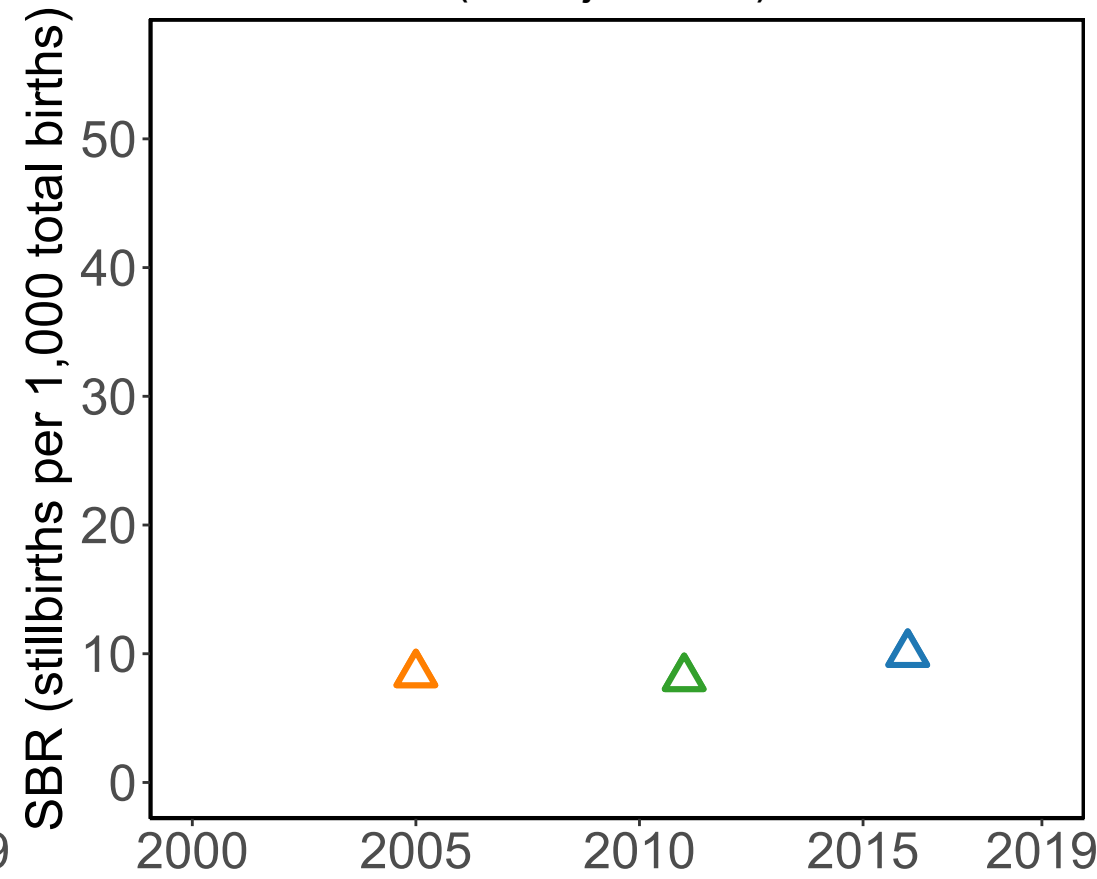

### Data Included in the Model

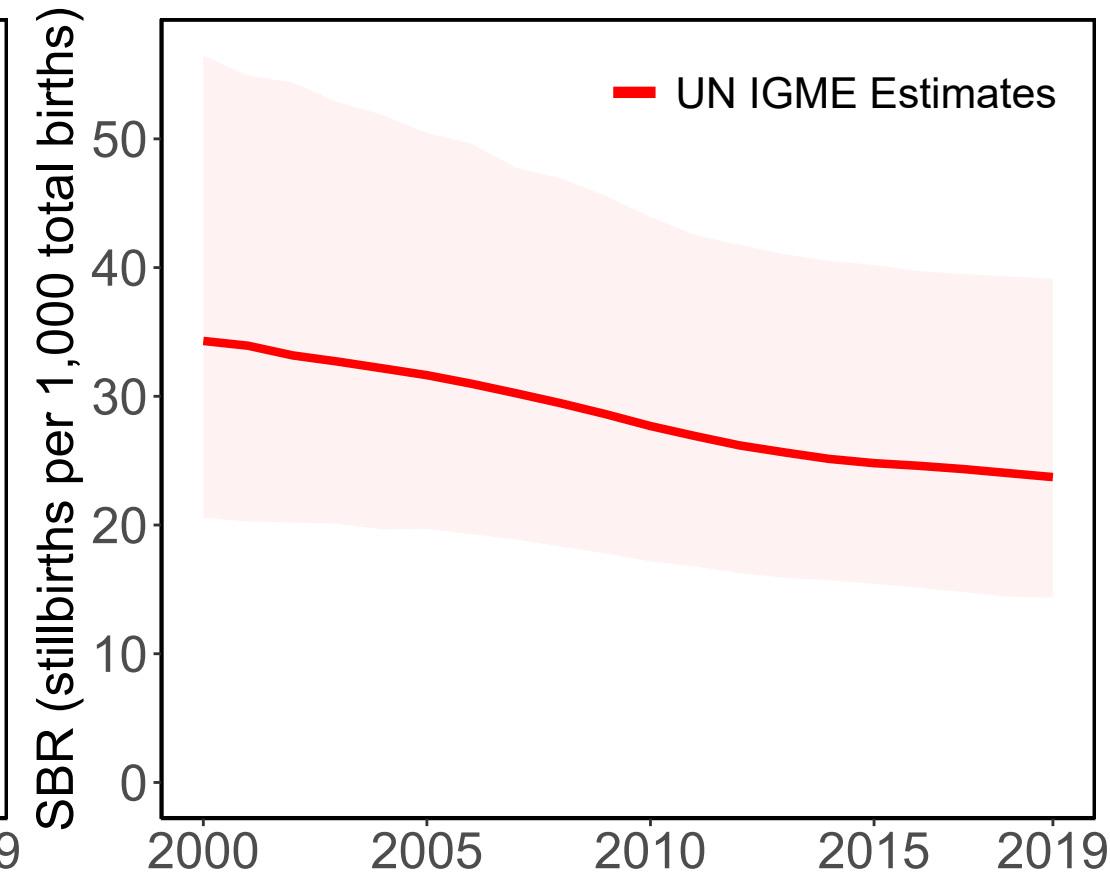

#### Source Types

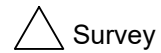

Survey

#### Data Sources

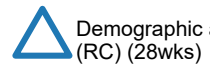

Demographic and Health Survey 2019 (DHS) (RC) (28wks)

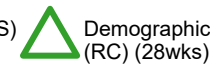

Demographic and Health Survey 2013 (DHS) (RC) (28wks)

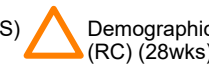

Demographic and Health Survey 2008 (DHS) (RC) (28wks)

# El Salvador

### Available Data

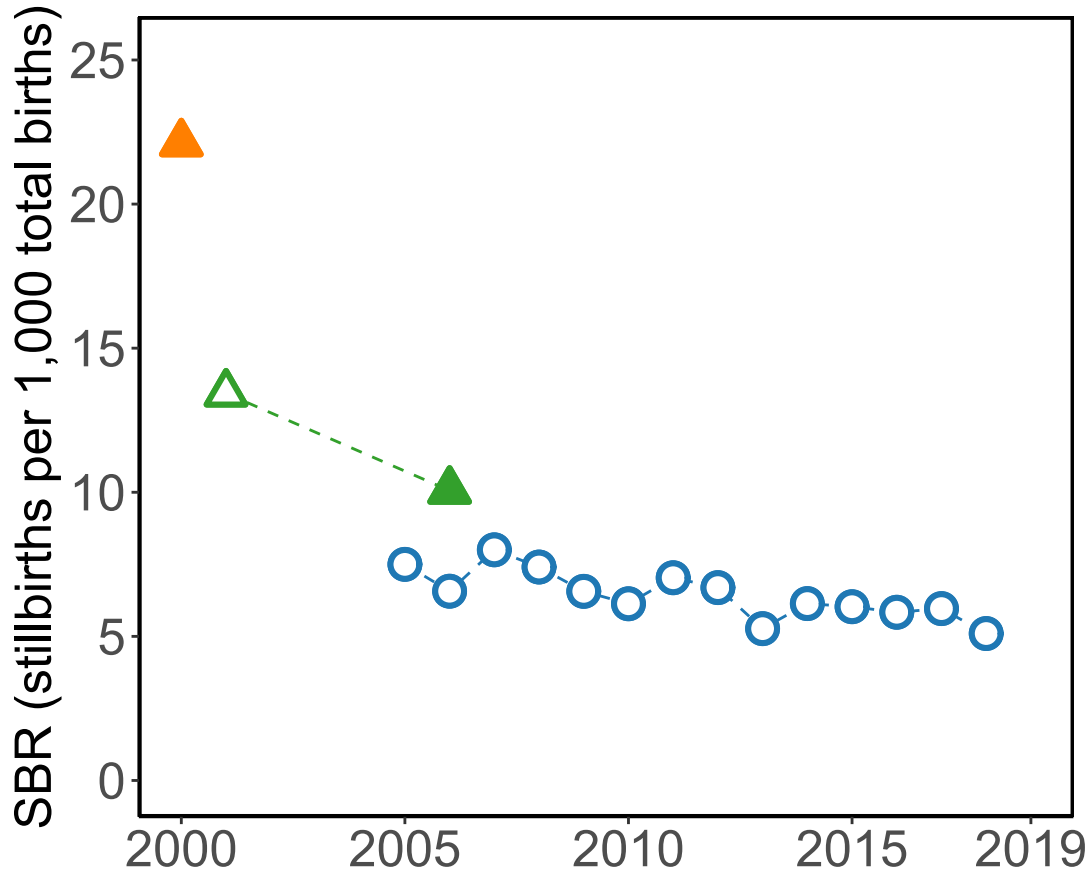

### '28+ Weeks of Gestation' Data (Incl. Adjusted Data)

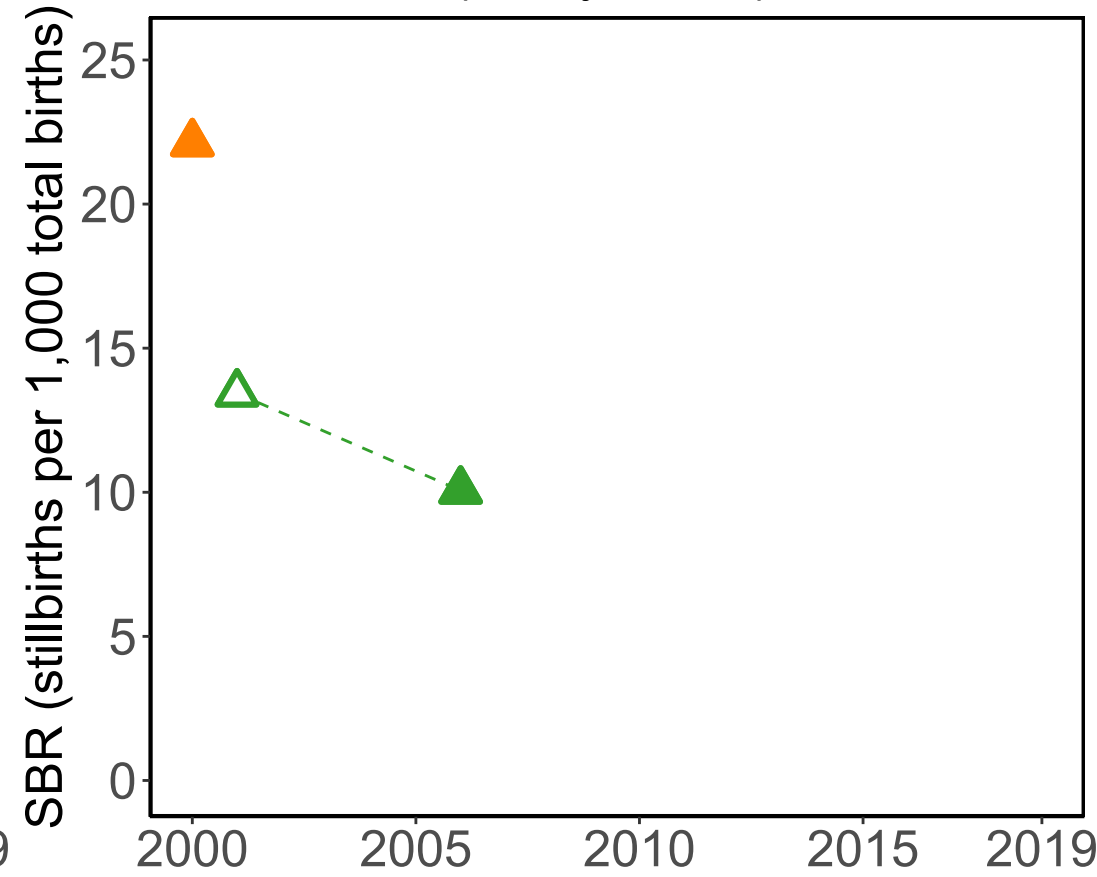

### Data Included in the Model

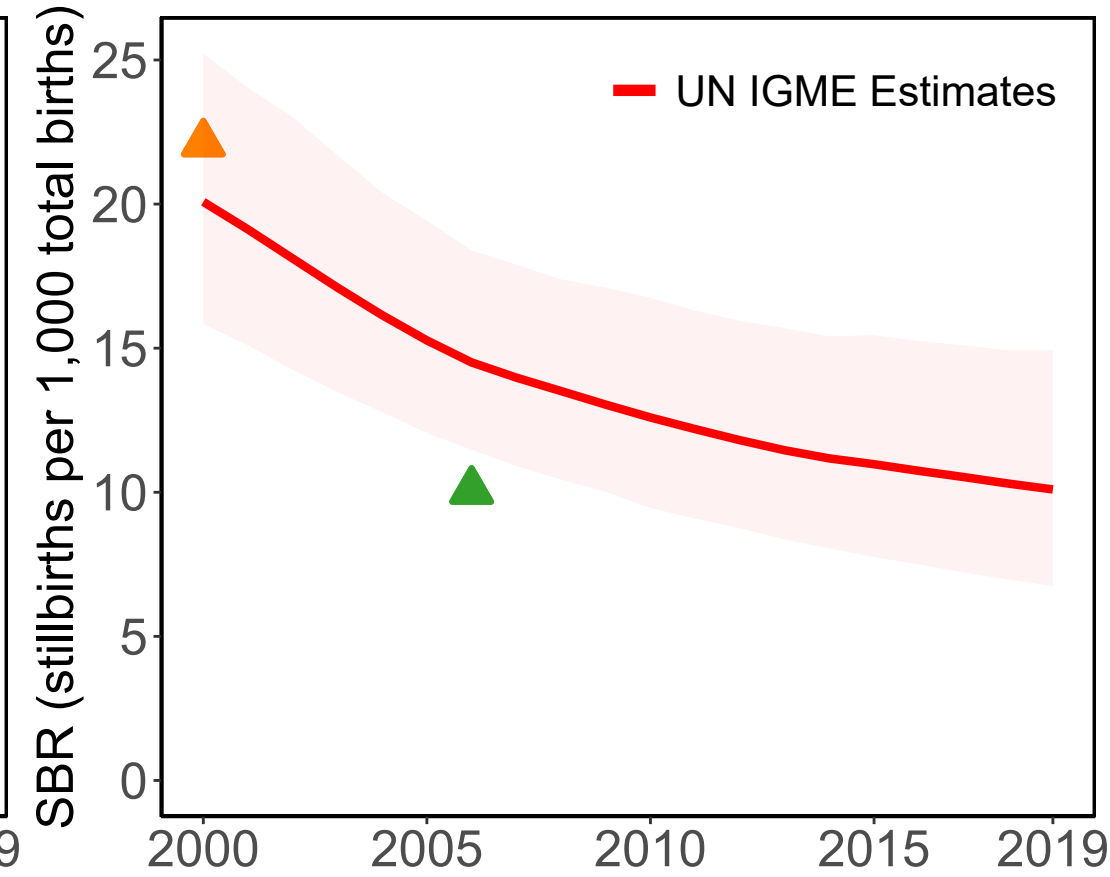

#### Source Types

○ HMIS   △ Survey

#### Data Sources

○ HMIS-DHIS2 (1000g)

▲ Encuesta Nacional de Salud Familiar 2008 (RHS) (PH) (28wks)

▲ Encuesta Nacional de Salud Familiar 2002-03 (RHS) (PH) (28wks)

— UN IGME Estimates



# San Marino

### Available Data

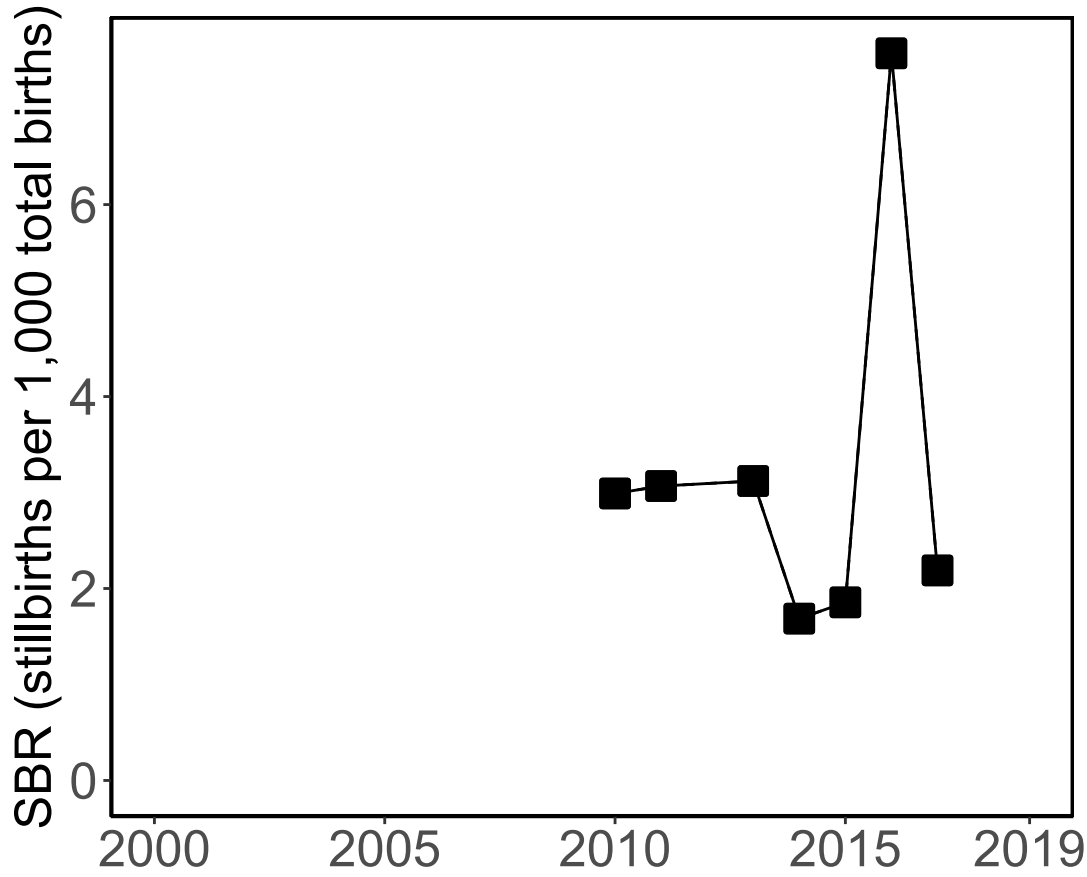

### '28+ Weeks of Gestation' Data (Incl. Adjusted Data)

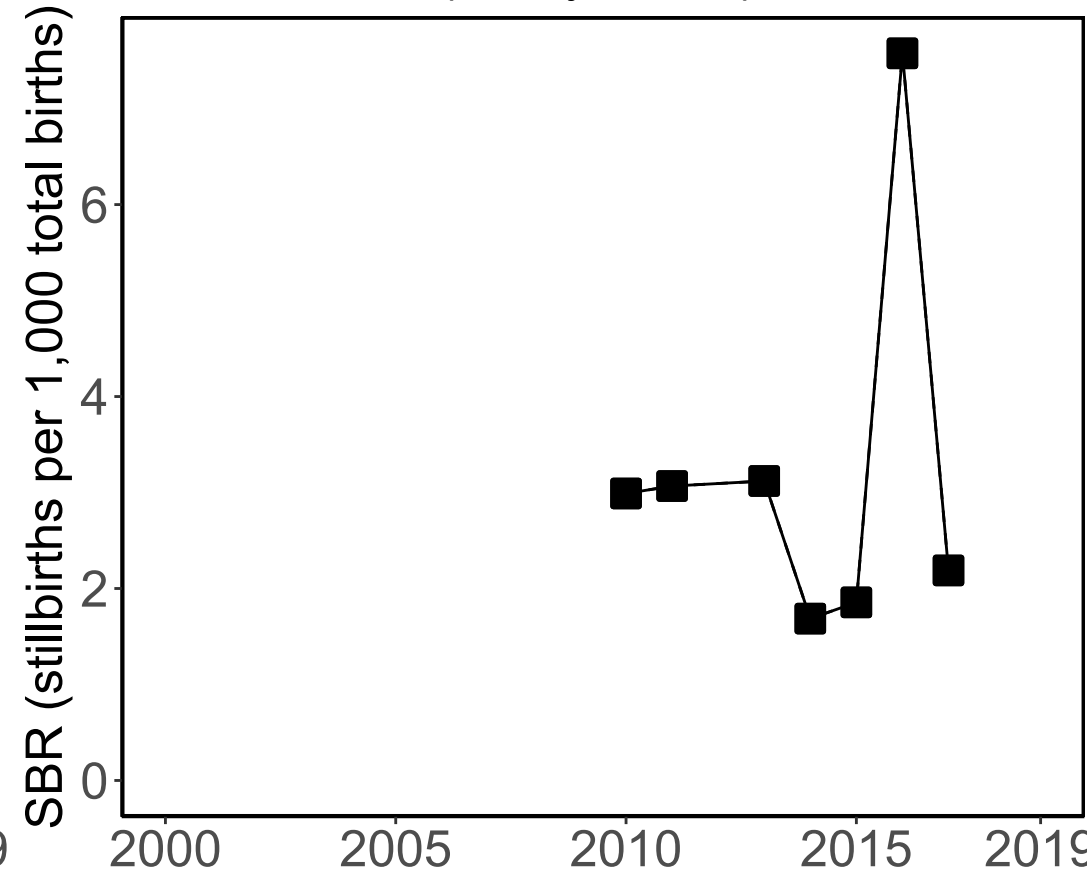

### Data Included in the Model

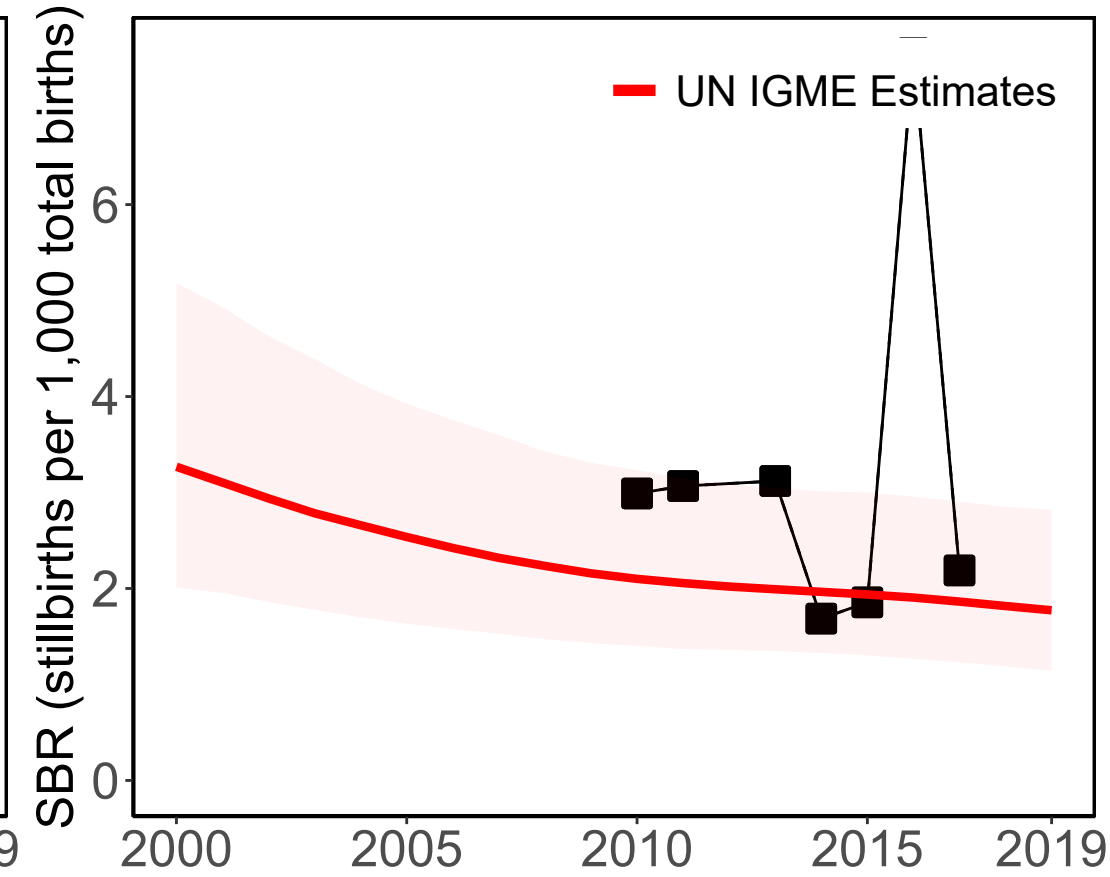

#### Source Types

Administrative

#### Data Sources

Vital Registration (28wks)

# Somalia

Available Data

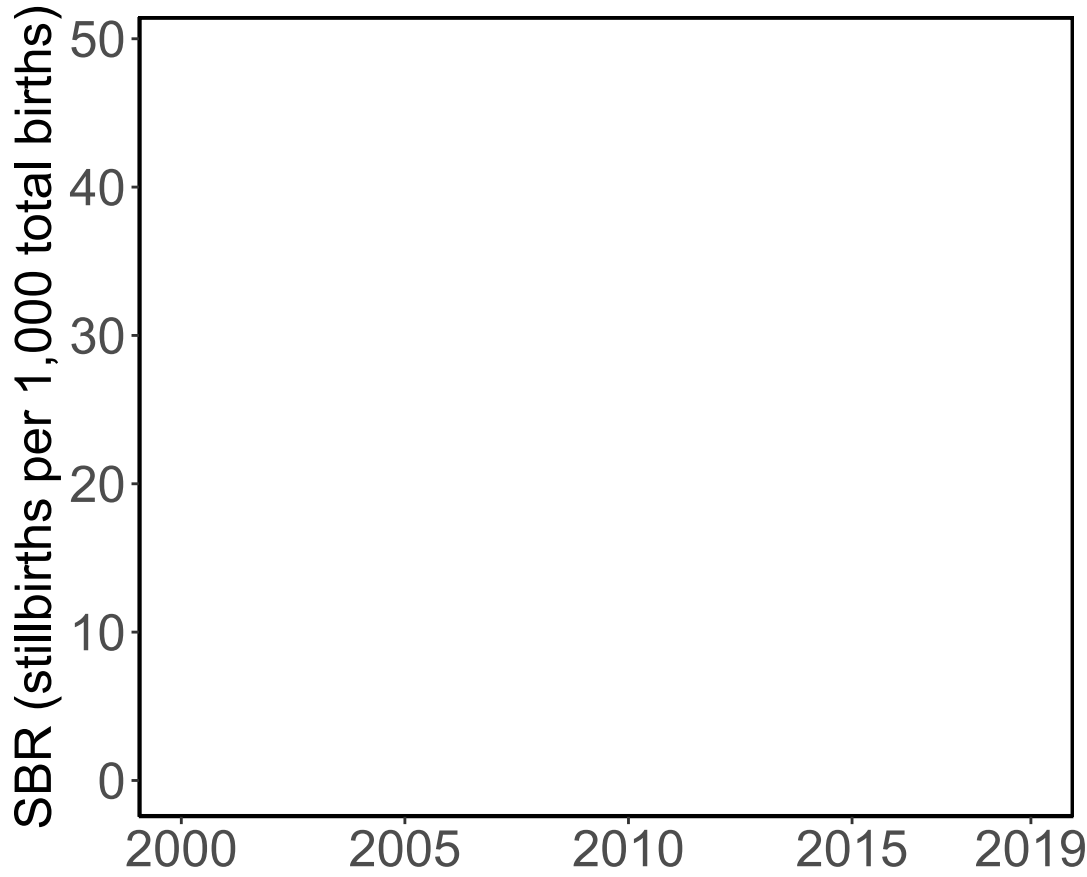

'28+ Weeks of Gestation' Data  
(Incl. Adjusted Data)

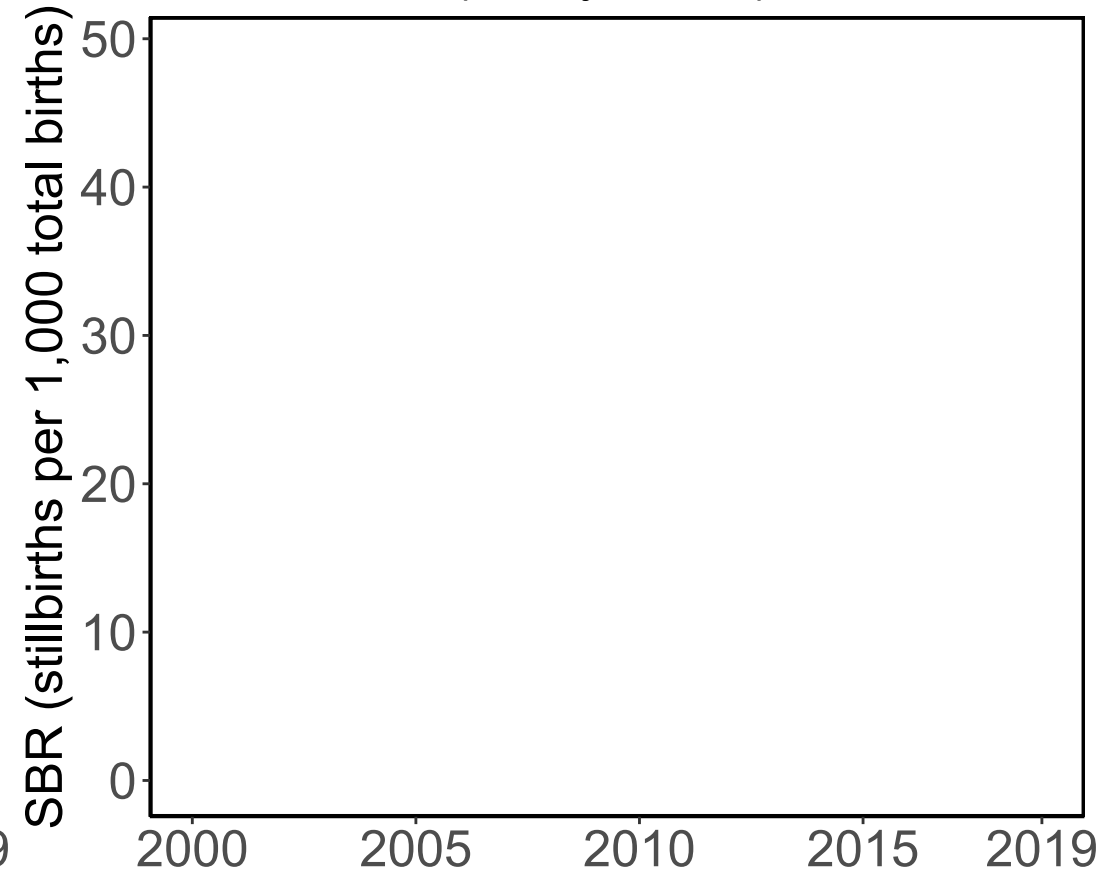

Data Included in the Model

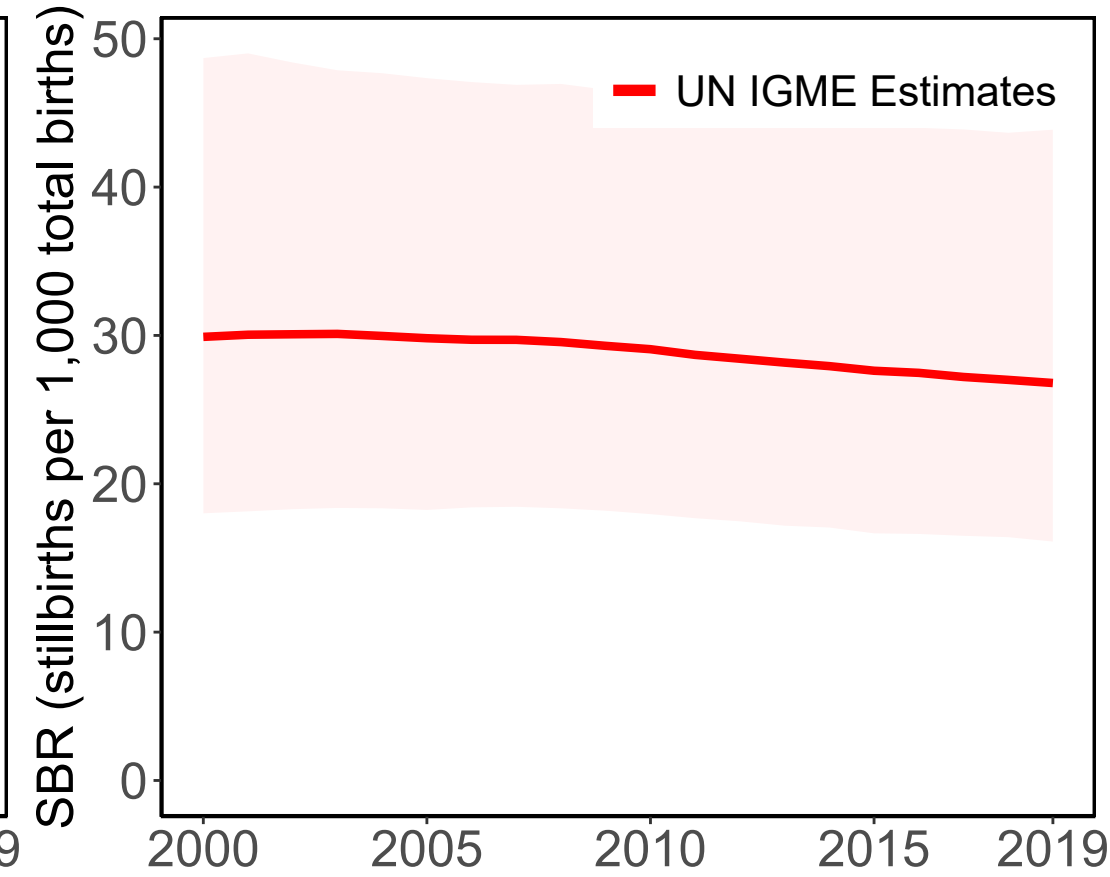

# Serbia

### Available Data

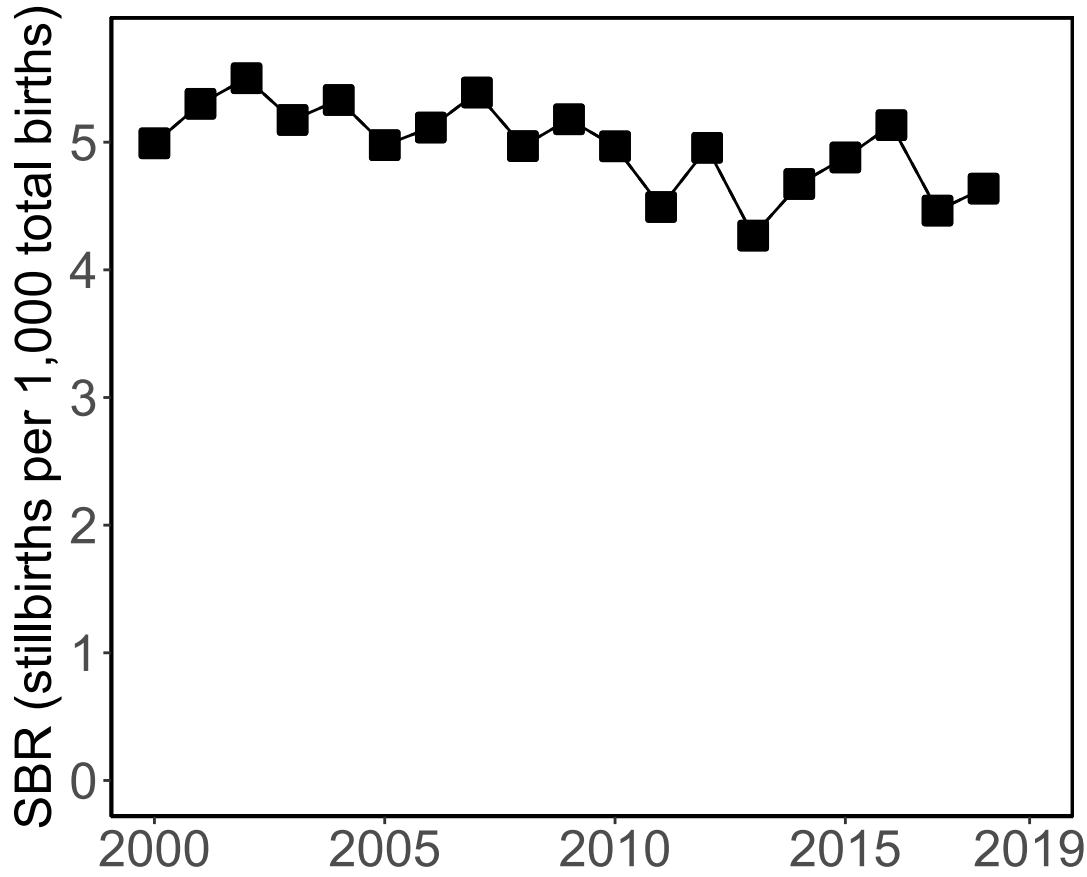

### '28+ Weeks of Gestation' Data (Incl. Adjusted Data)

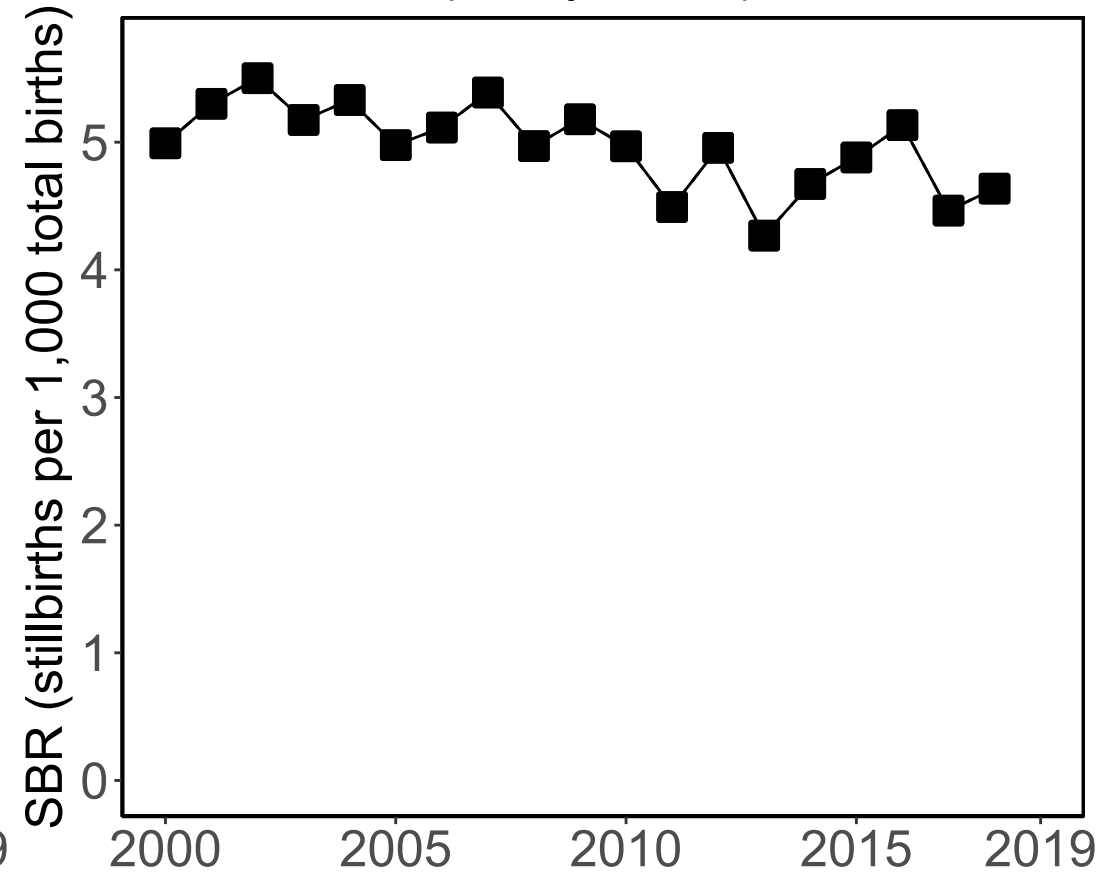

### Data Included in the Model

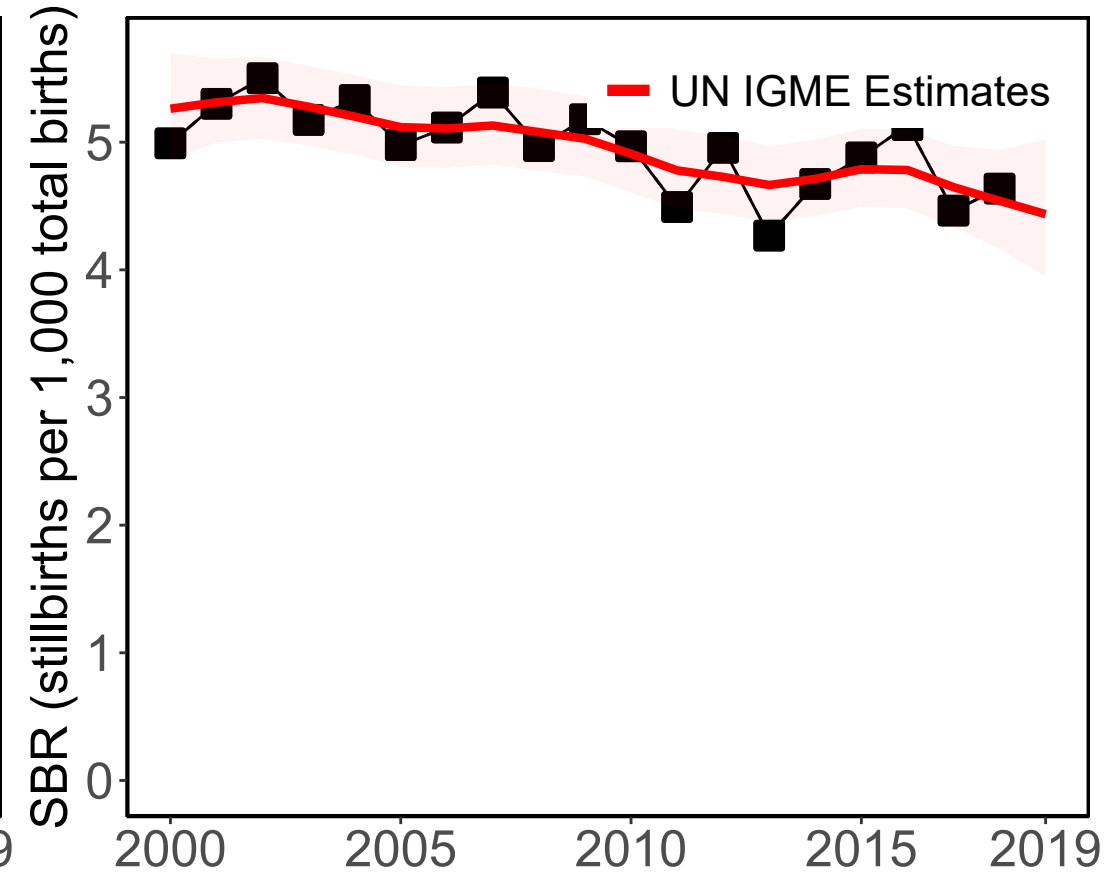

#### Source Types

□ Administrative

#### Data Sources

■ Vital Registration (28wks)

# South Sudan

### Available Data

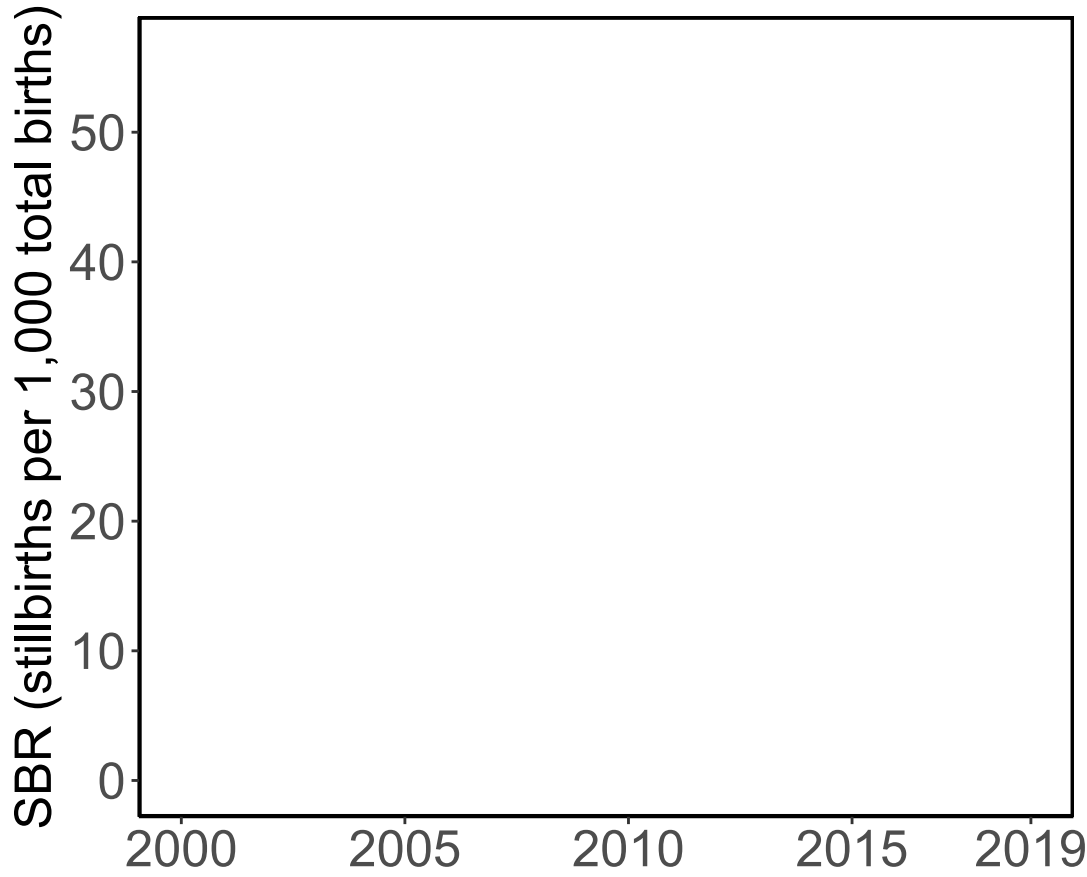

### '28+ Weeks of Gestation' Data (Incl. Adjusted Data)

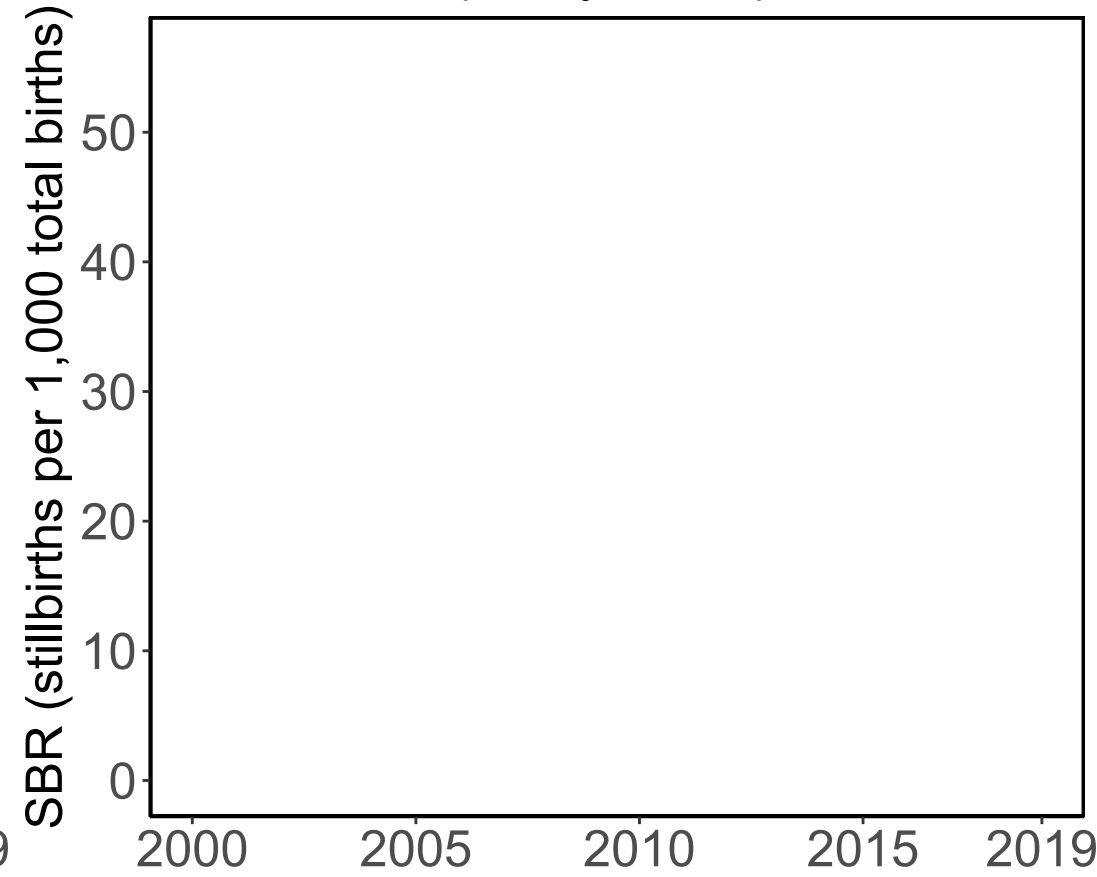

### Data Included in the Model

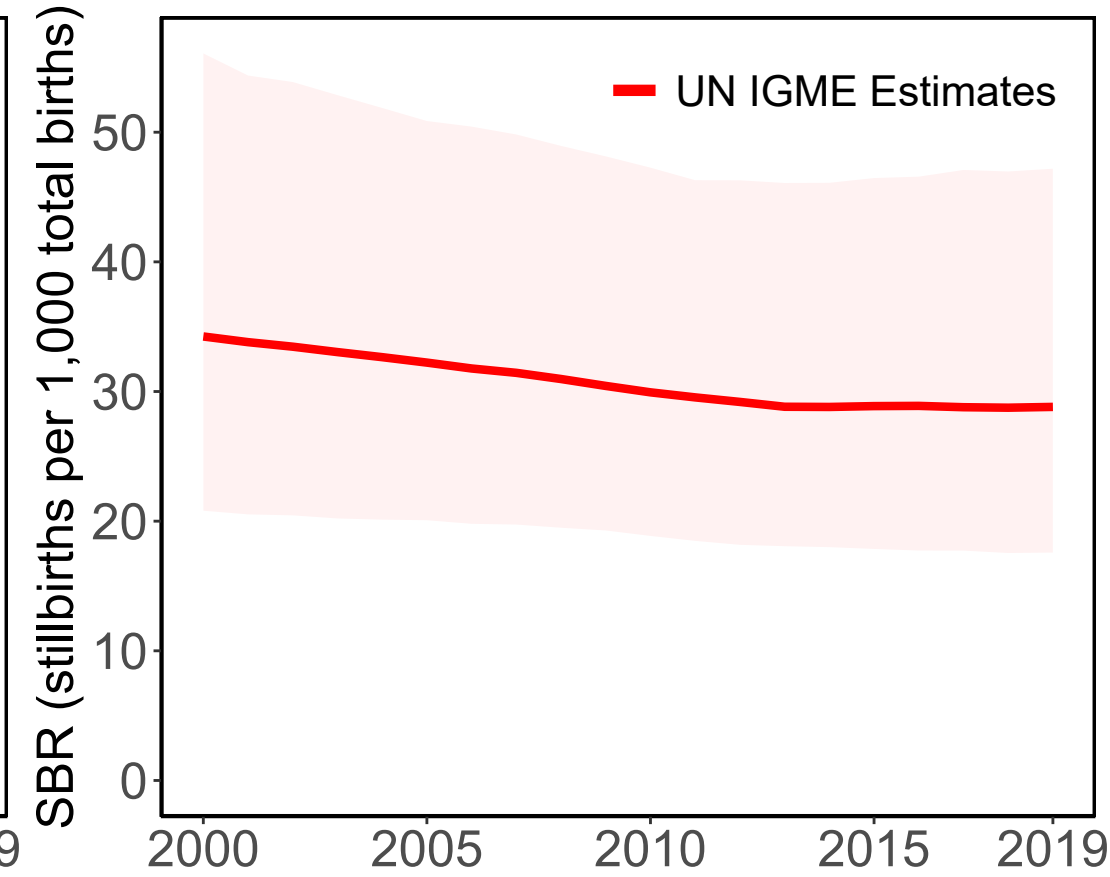

# Sao Tome and Principe

## Available Data

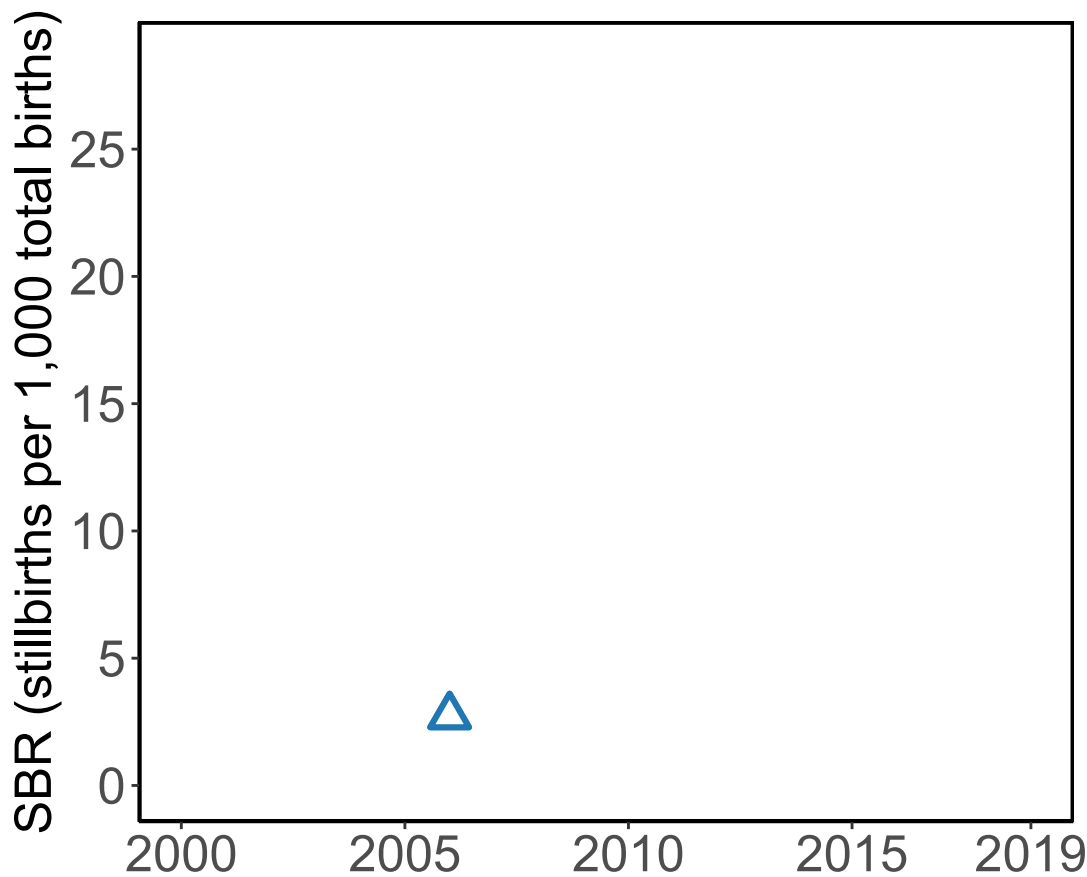

## '28+ Weeks of Gestation' Data (Incl. Adjusted Data)

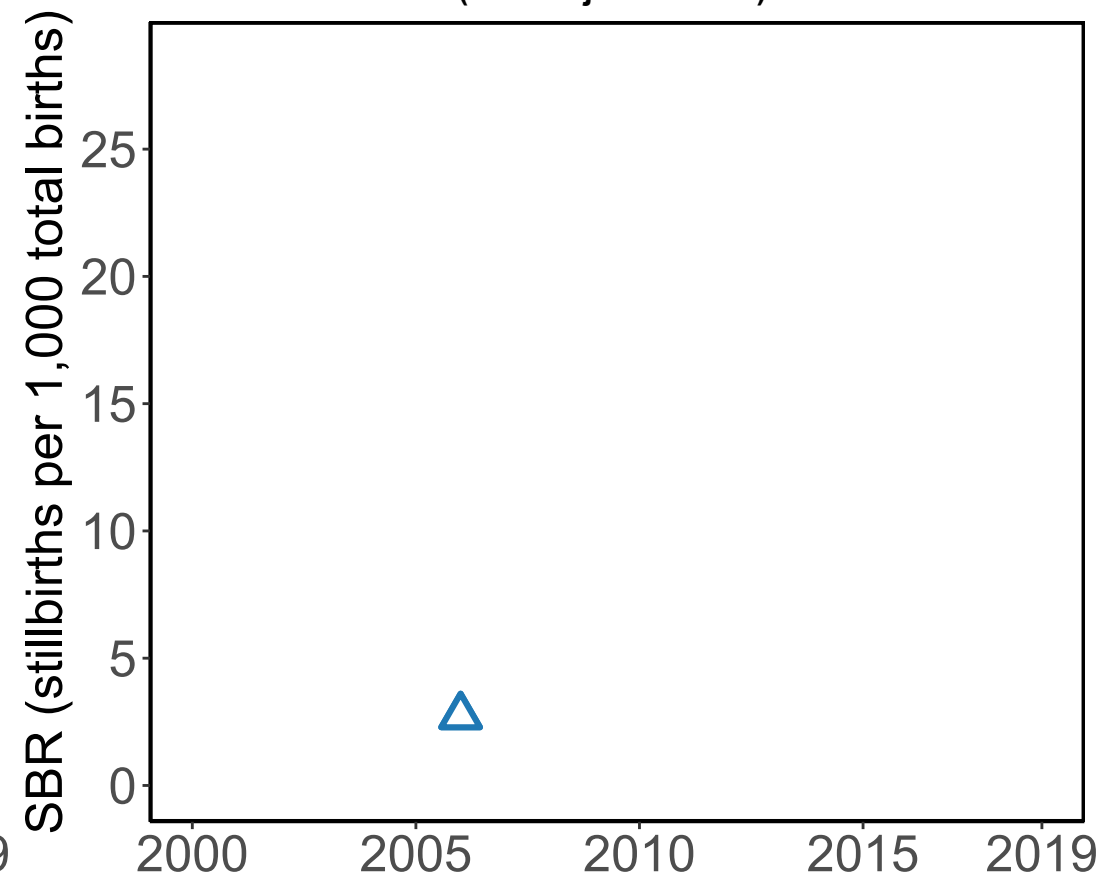

## Data Included in the Model

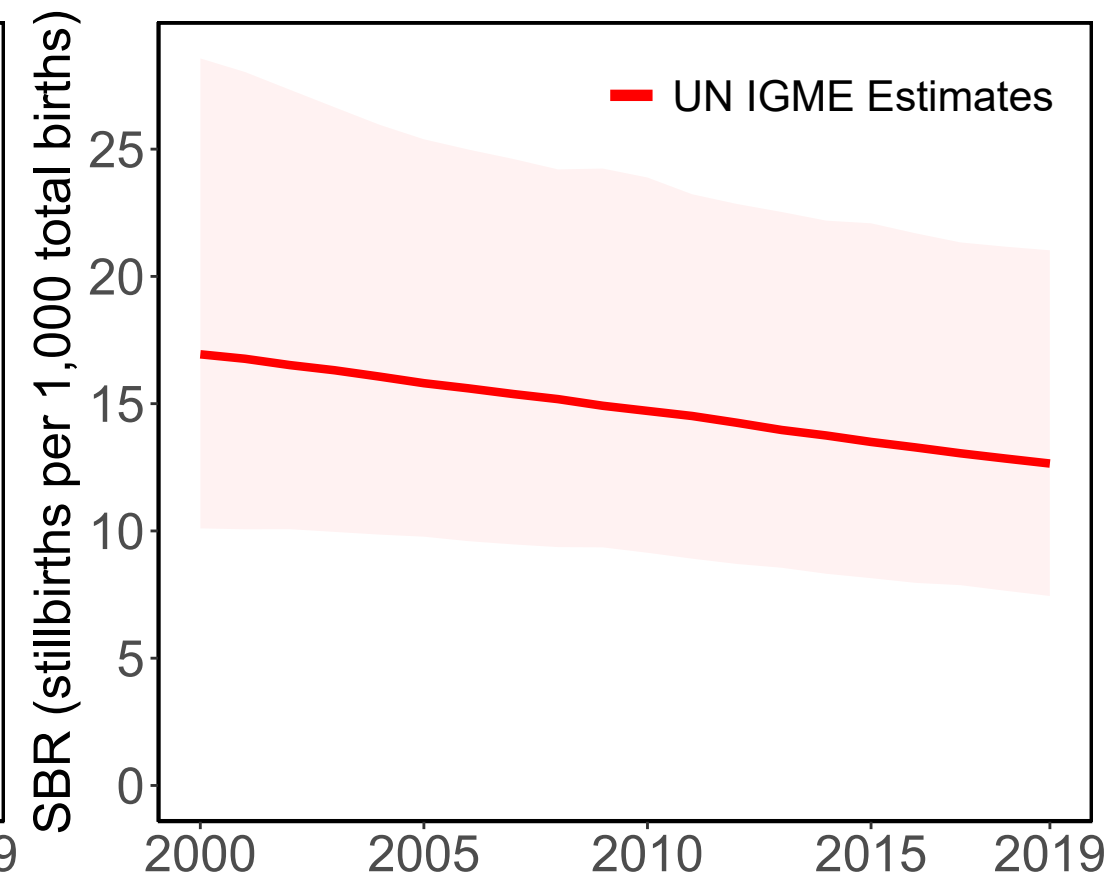

### Source Types



Survey

### Data Sources

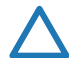

Demographic and Health Survey 2008-09 (DHS)  
(BH/SQ) (28wks)

# Suriname

### Available Data

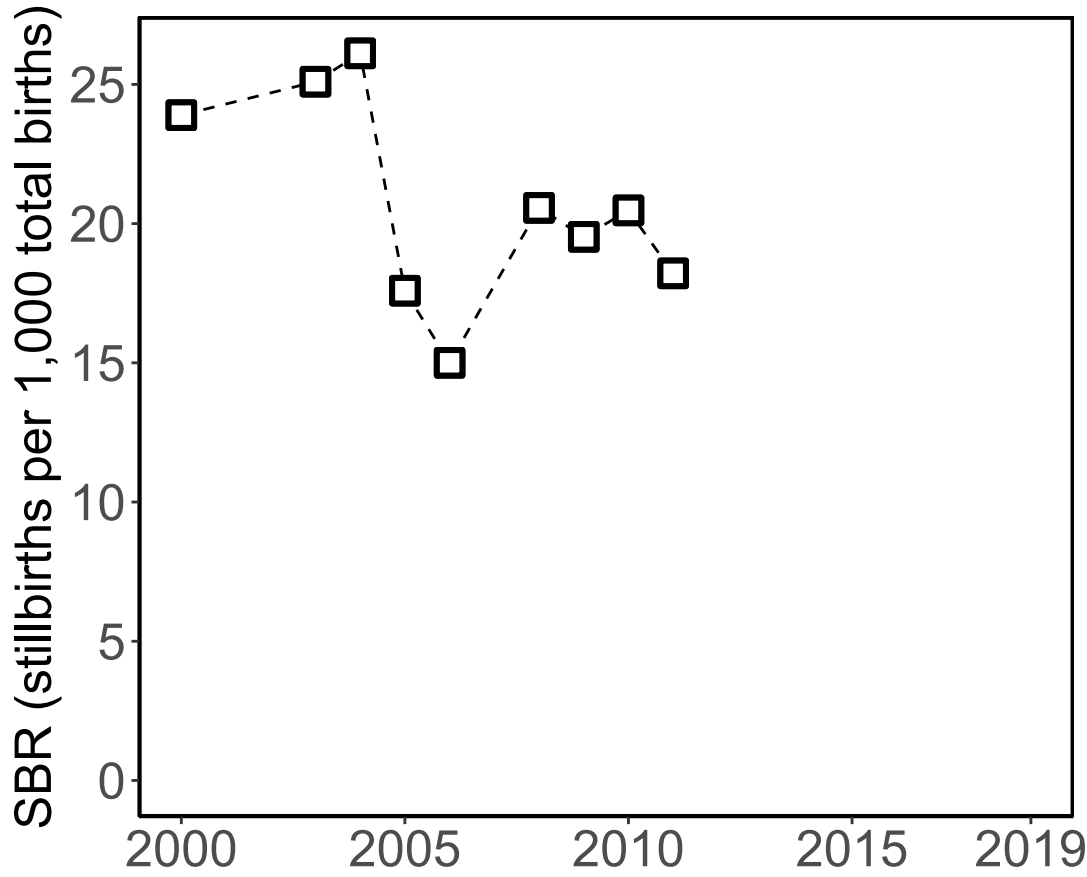

### '28+ Weeks of Gestation' Data (Incl. Adjusted Data)

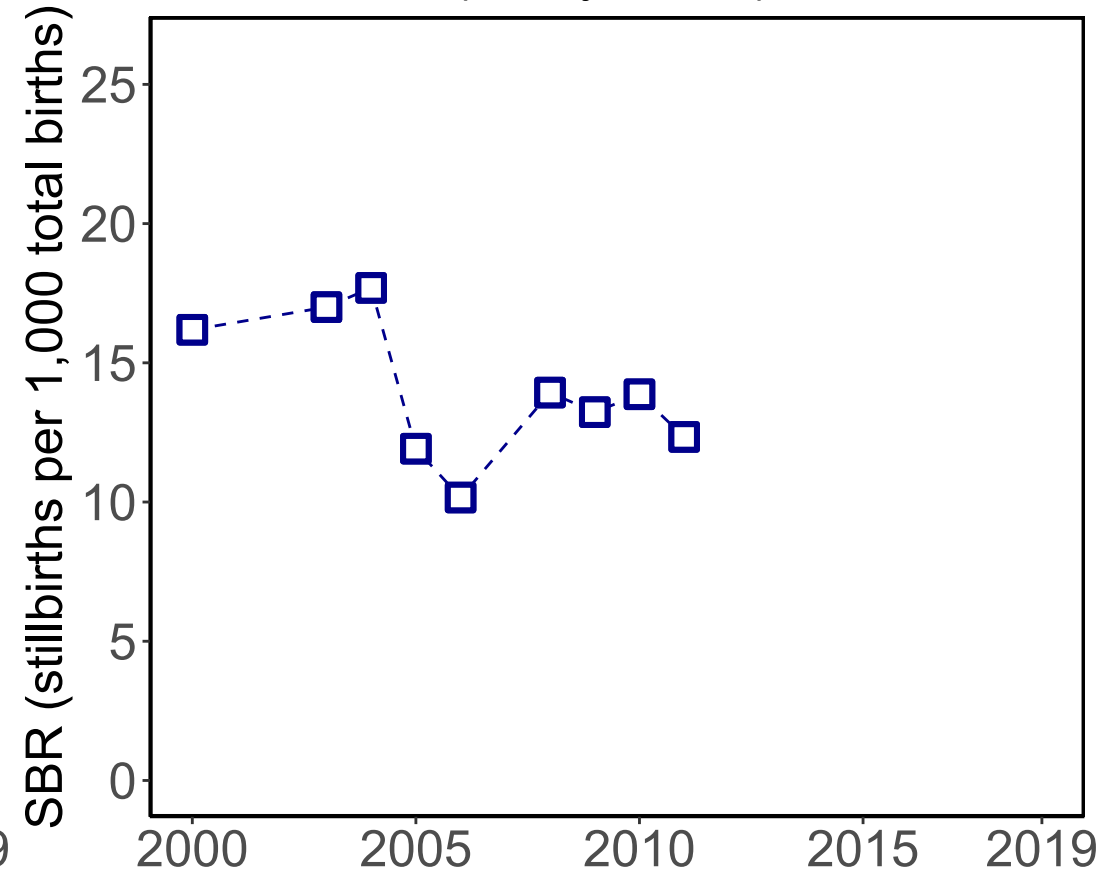

### Data Included in the Model

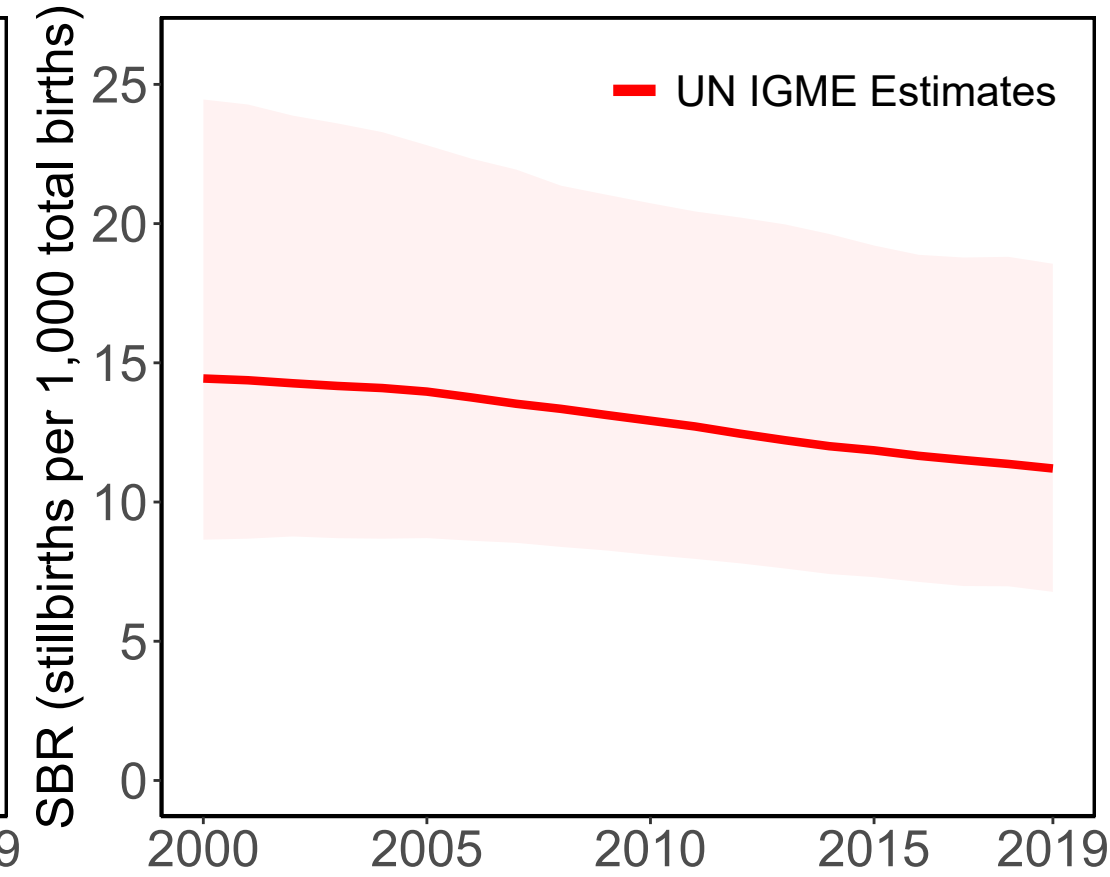

#### Source Types

Administrative

#### Data Sources

Vital Registration (22wks)

Vital Registration (28wks adj from 22wks)

# Slovakia

### Available Data

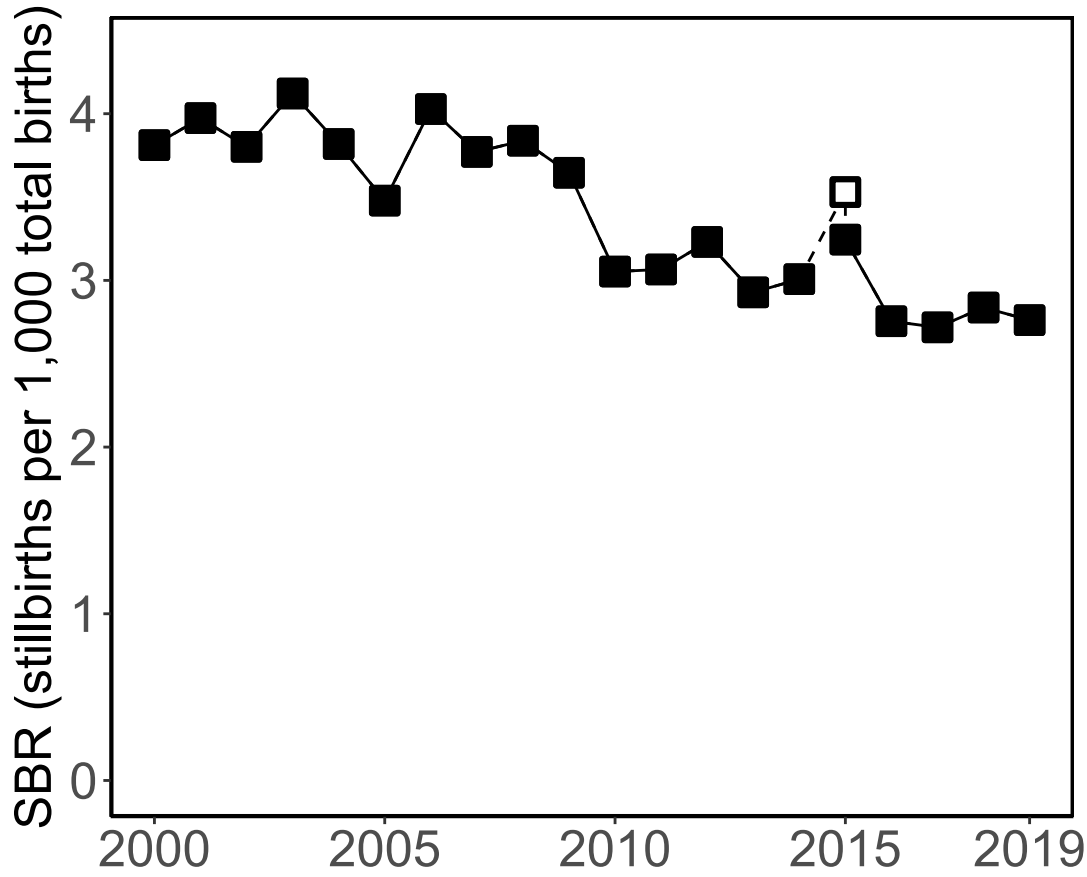

### '28+ Weeks of Gestation' Data (Incl. Adjusted Data)

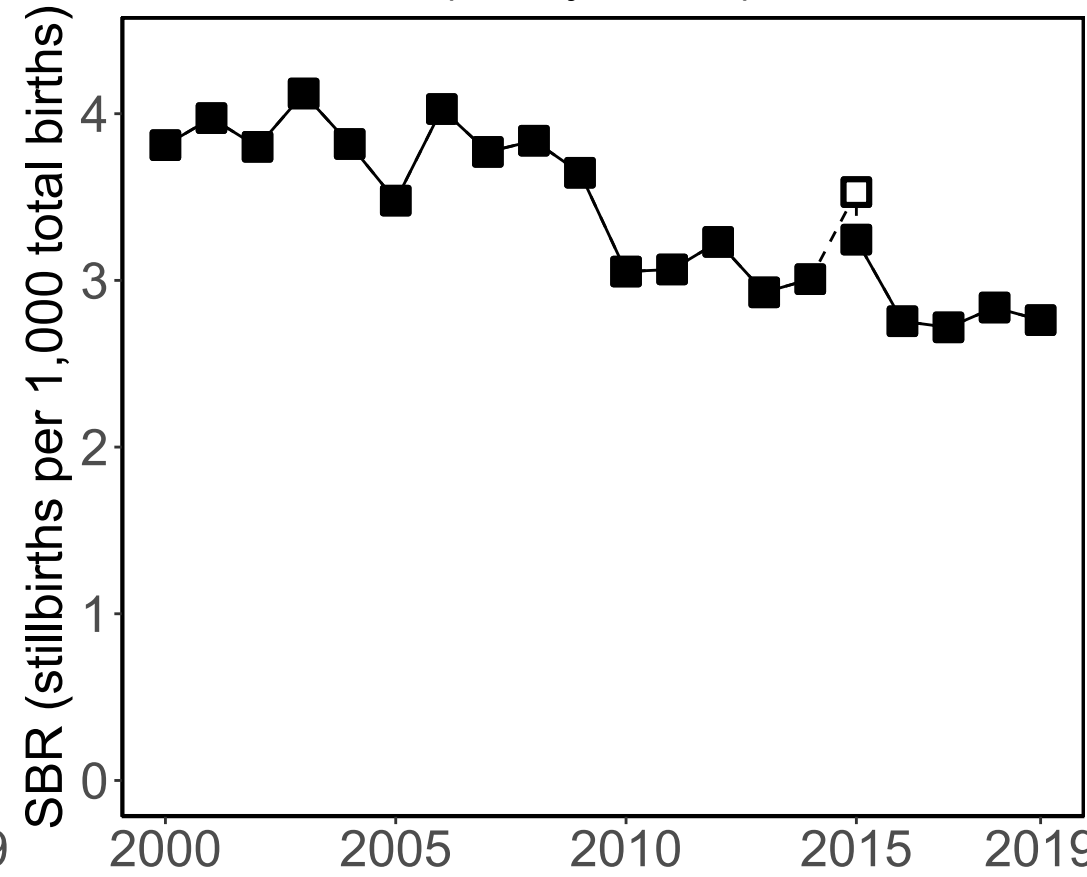

### Data Included in the Model

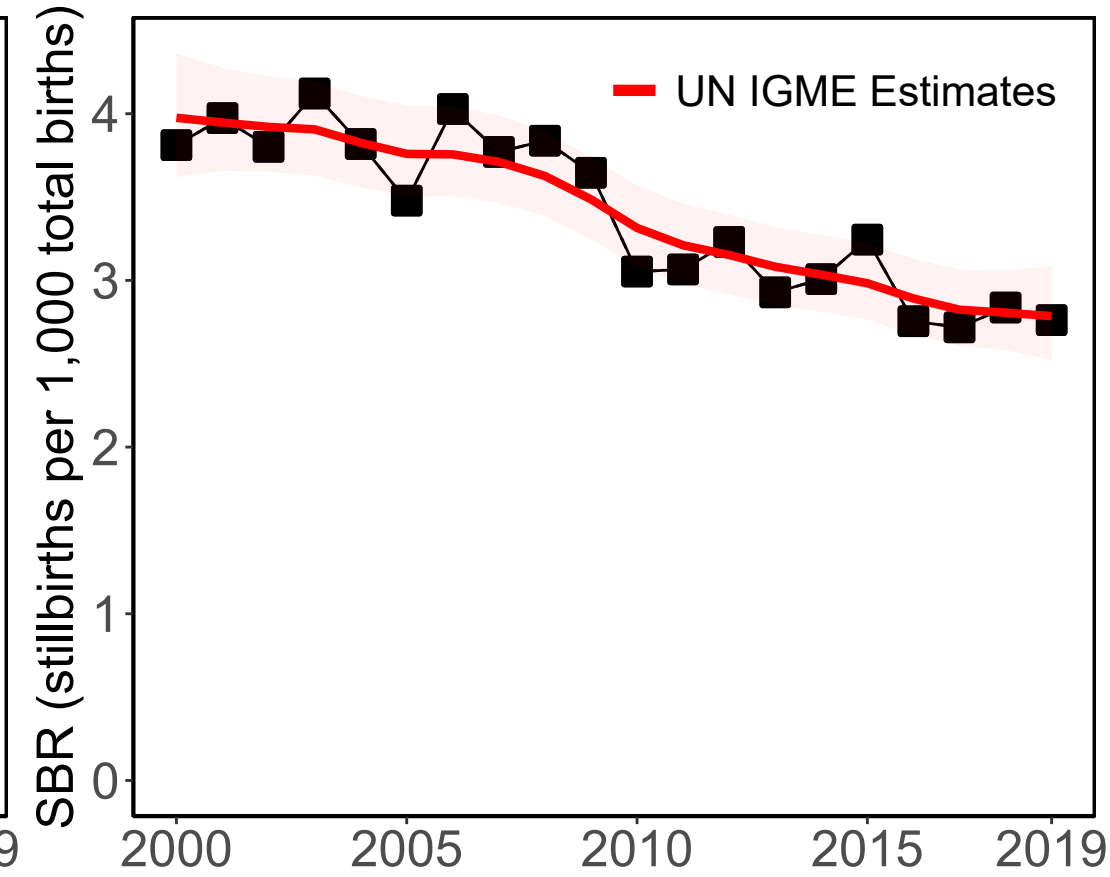

#### Source Types

□ Administrative

#### Data Sources

■ Vital Registration (28wks)

# Slovenia

### Available Data

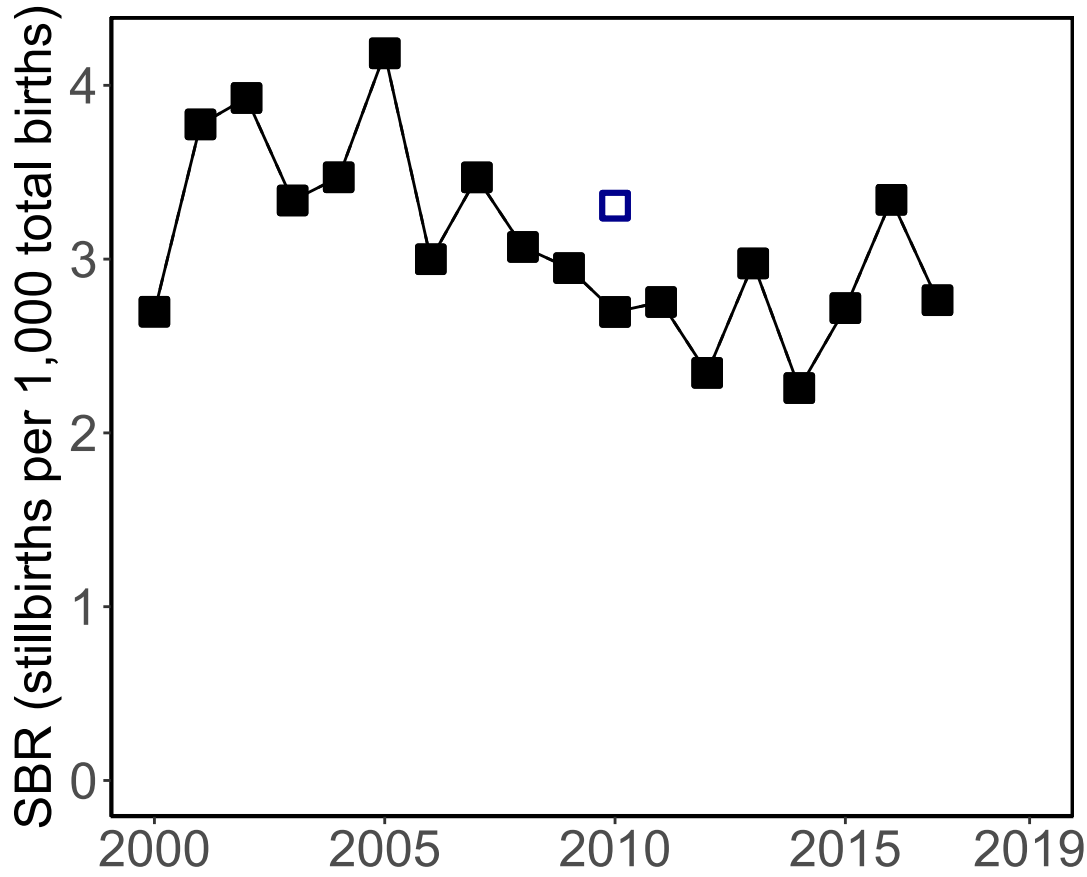

### '28+ Weeks of Gestation' Data (Incl. Adjusted Data)

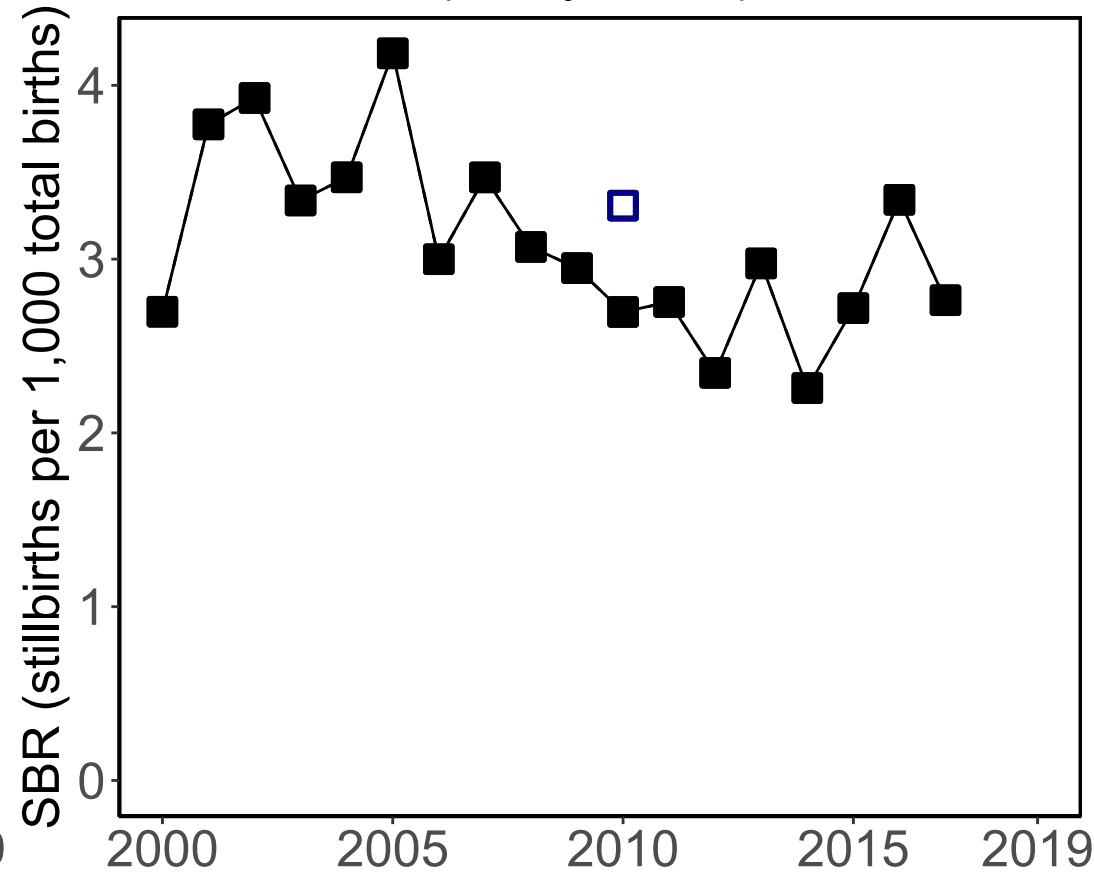

### Data Included in the Model

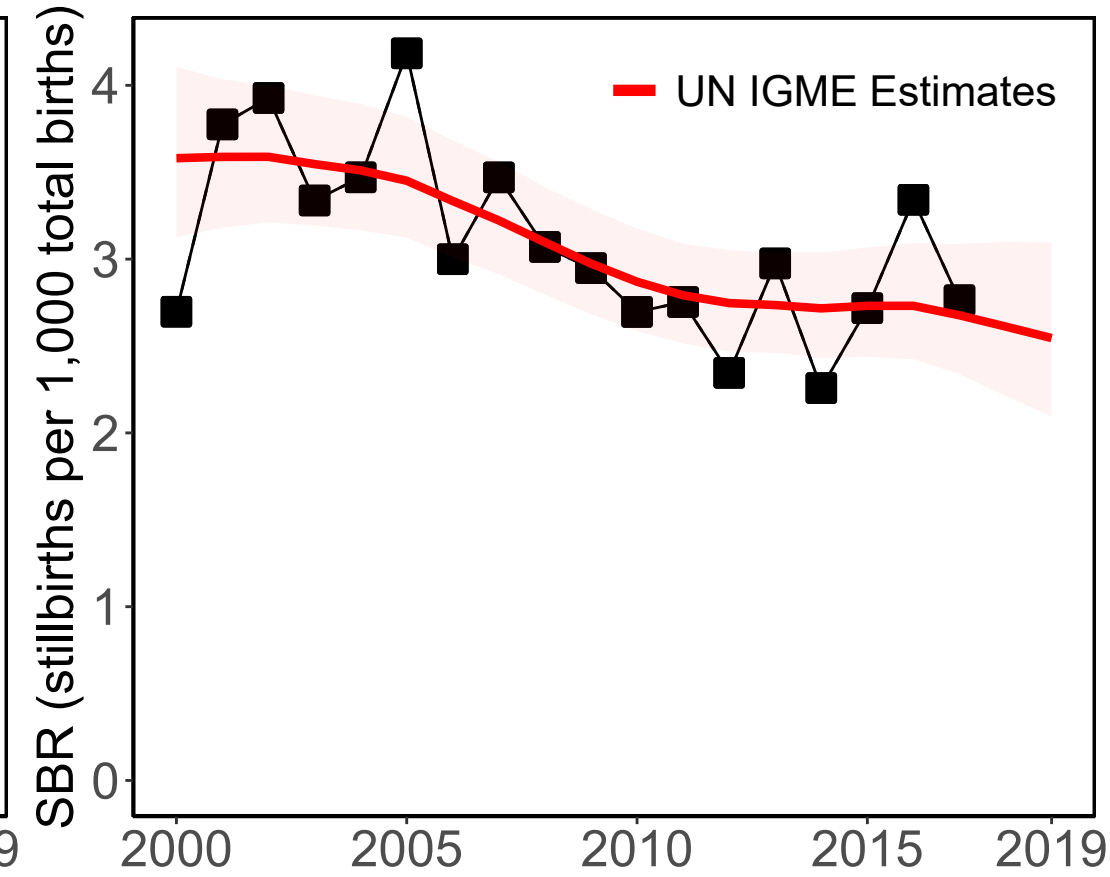

#### Source Types

□ Administrative

#### Data Sources

□ Vital Registration (28wks)

■ Birth or Death Registry (28wks)



# Sweden

### Available Data

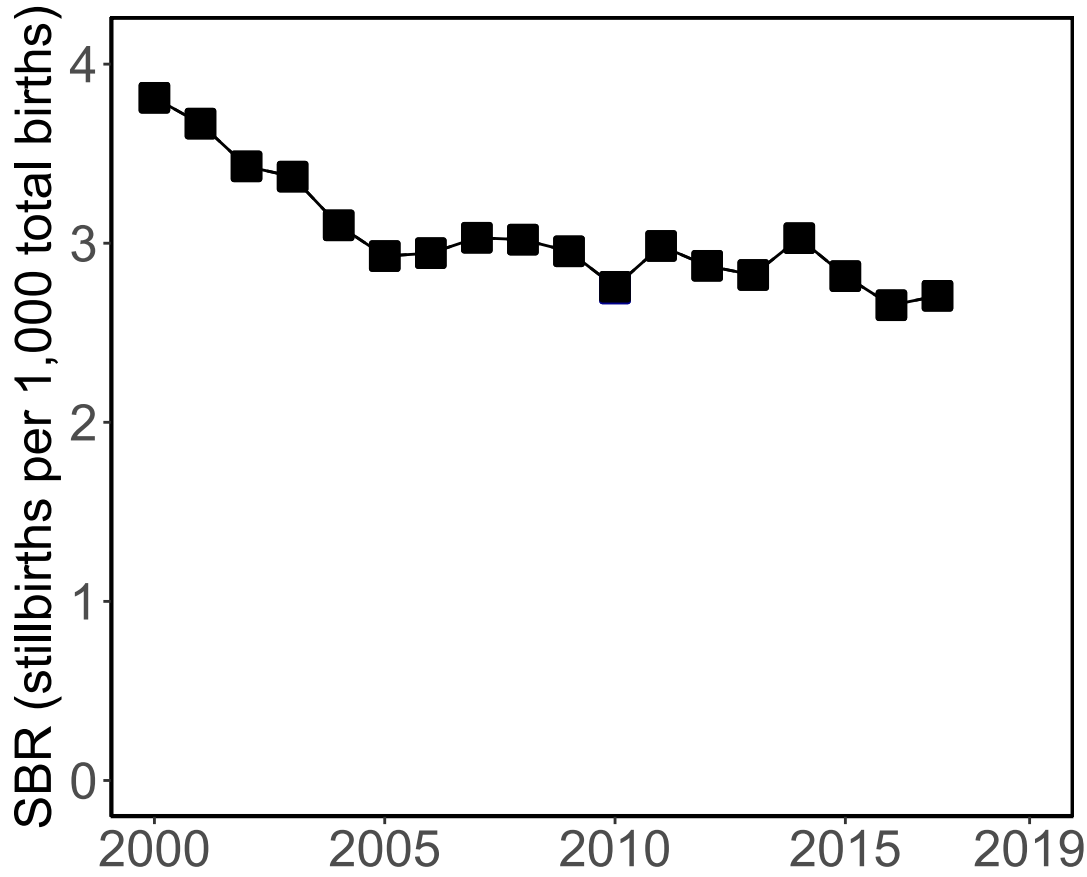

### '28+ Weeks of Gestation' Data (Incl. Adjusted Data)

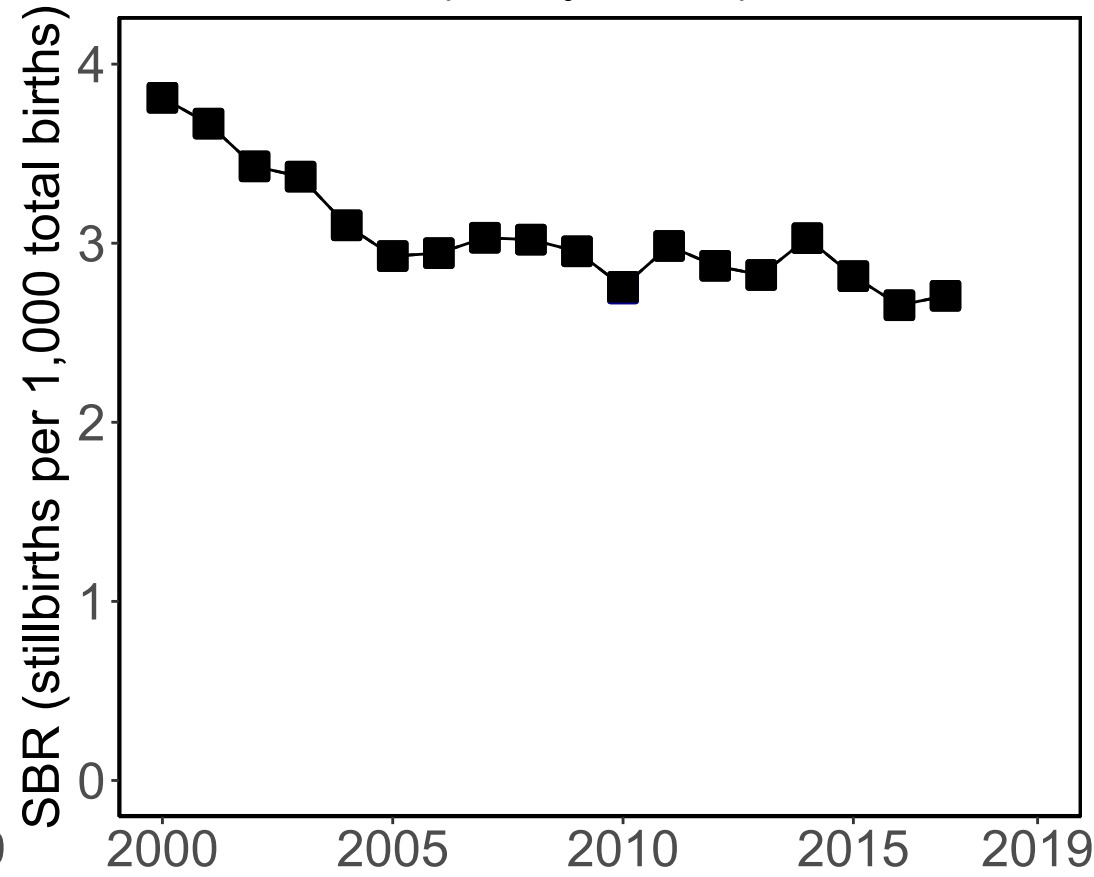

### Data Included in the Model

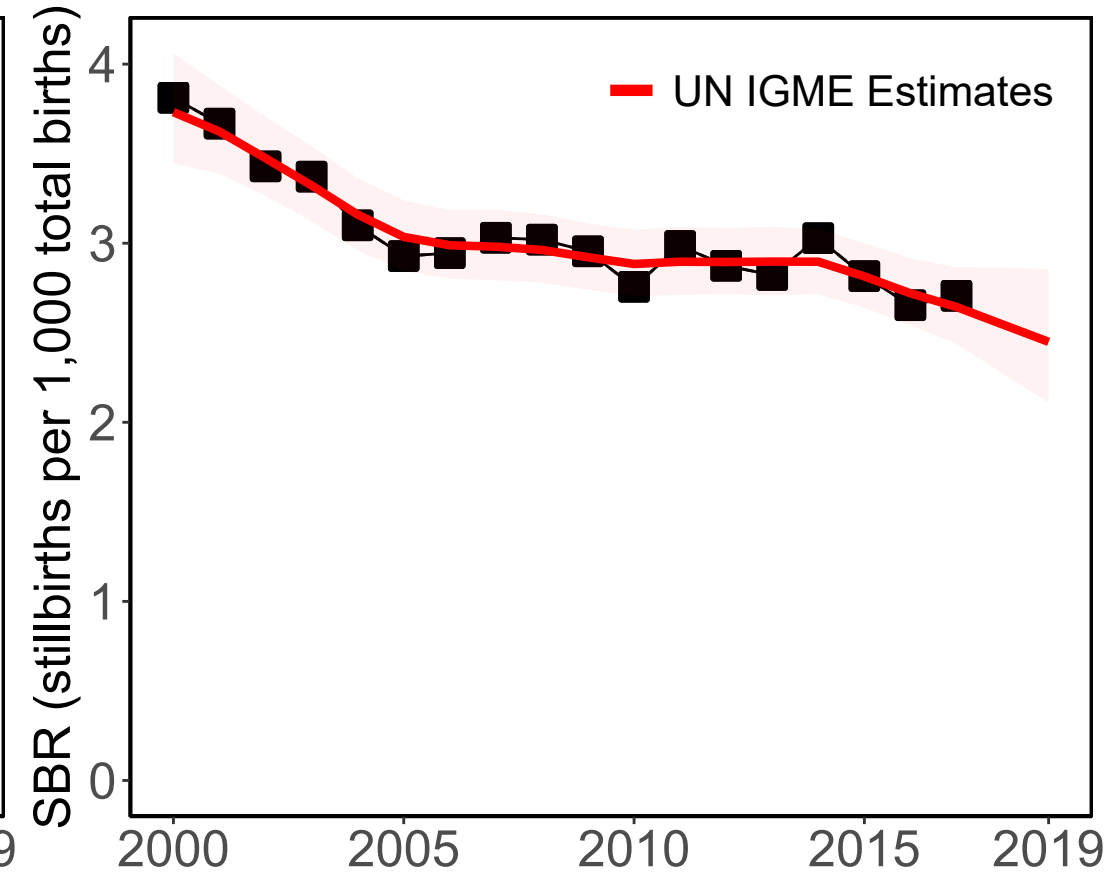

#### Source Types

Administrative

#### Data Sources

Vital Registration (28wks)

Birth or Death Registry (28wks)

# Eswatini

### Available Data

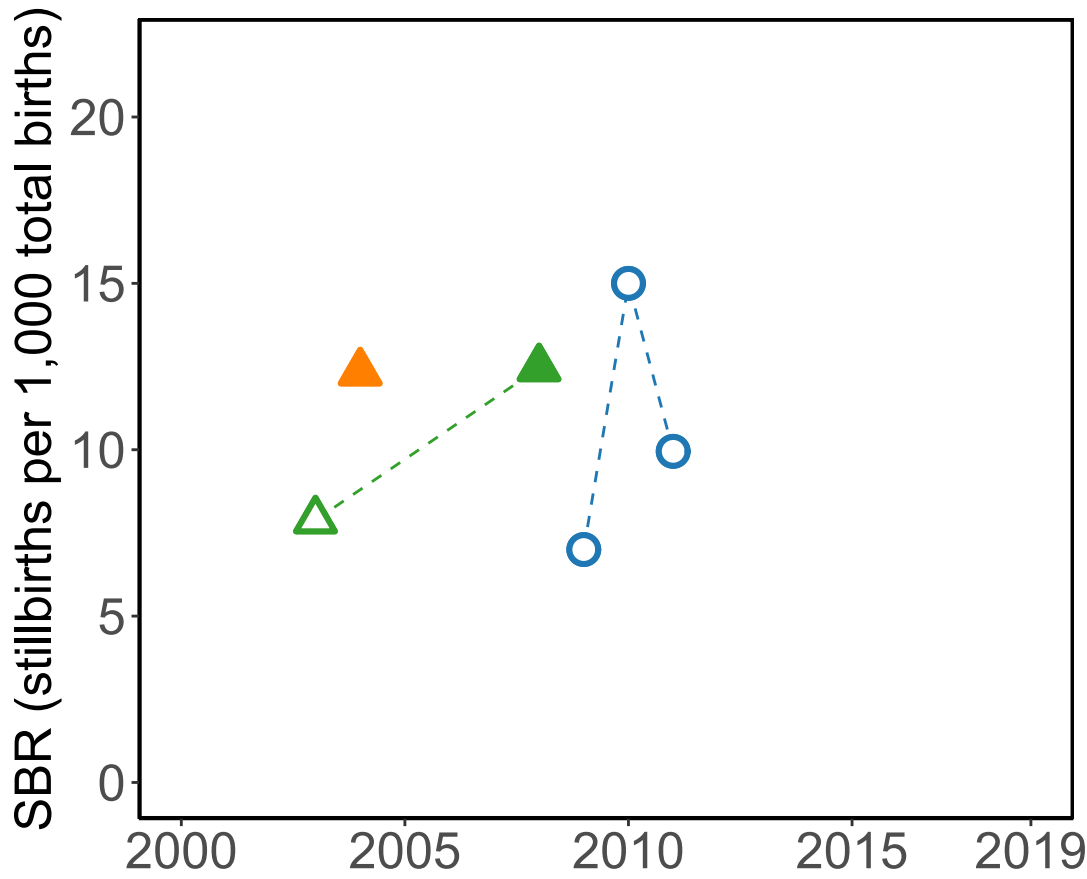

### '28+ Weeks of Gestation' Data (Incl. Adjusted Data)

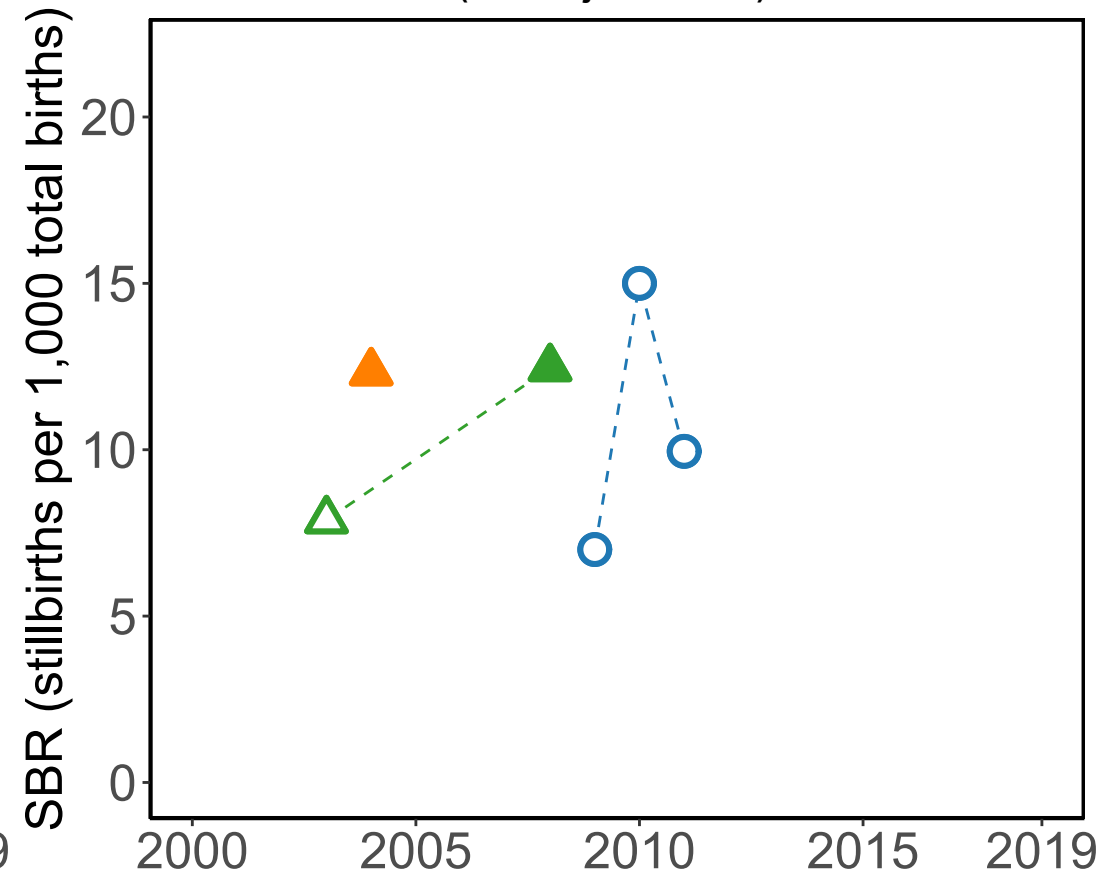

### Data Included in the Model

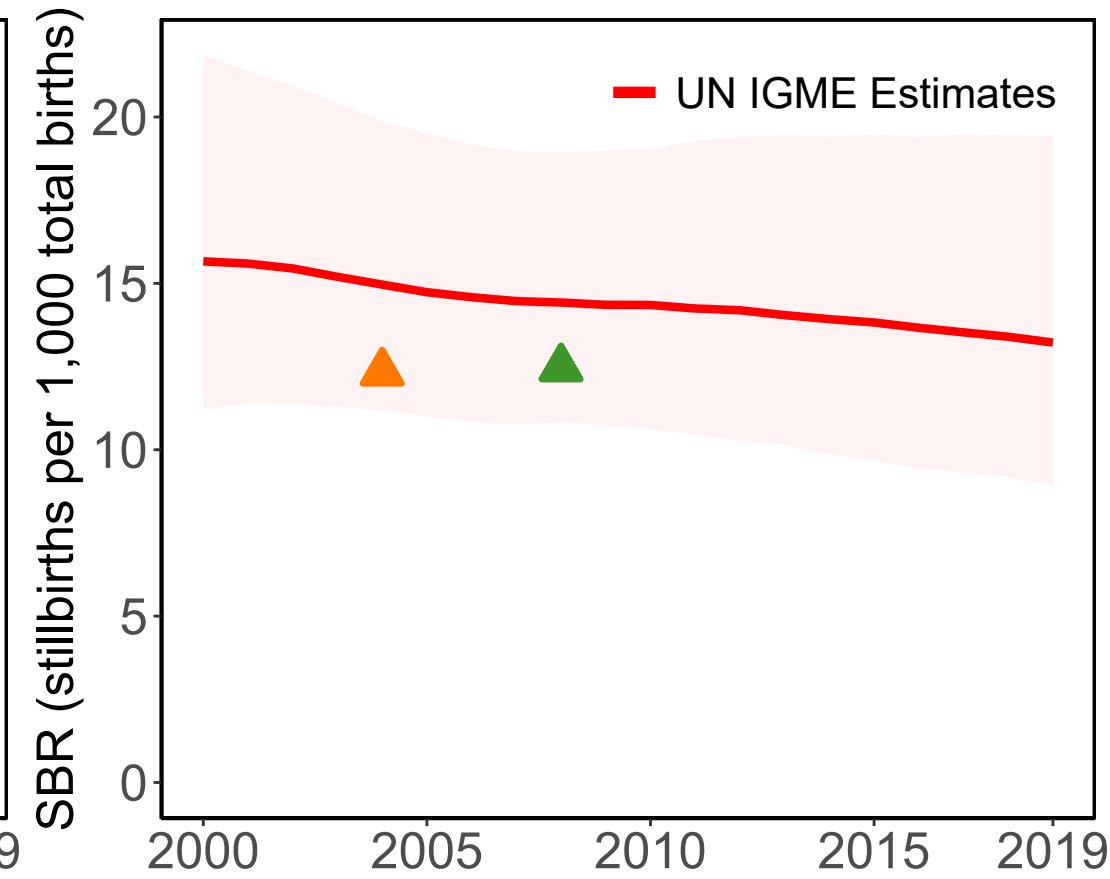

#### Source Types

○ HMIS △ Survey

#### Data Sources

○ HMIS-DHIS2 (28wks)

▲ Multiple Indicator Cluster Survey 2010 (MICS) (PH) (28wks)

▲ Demographic and Health Survey 2006-07 (DHS) (RC) (28wks)

# Seychelles

### Available Data

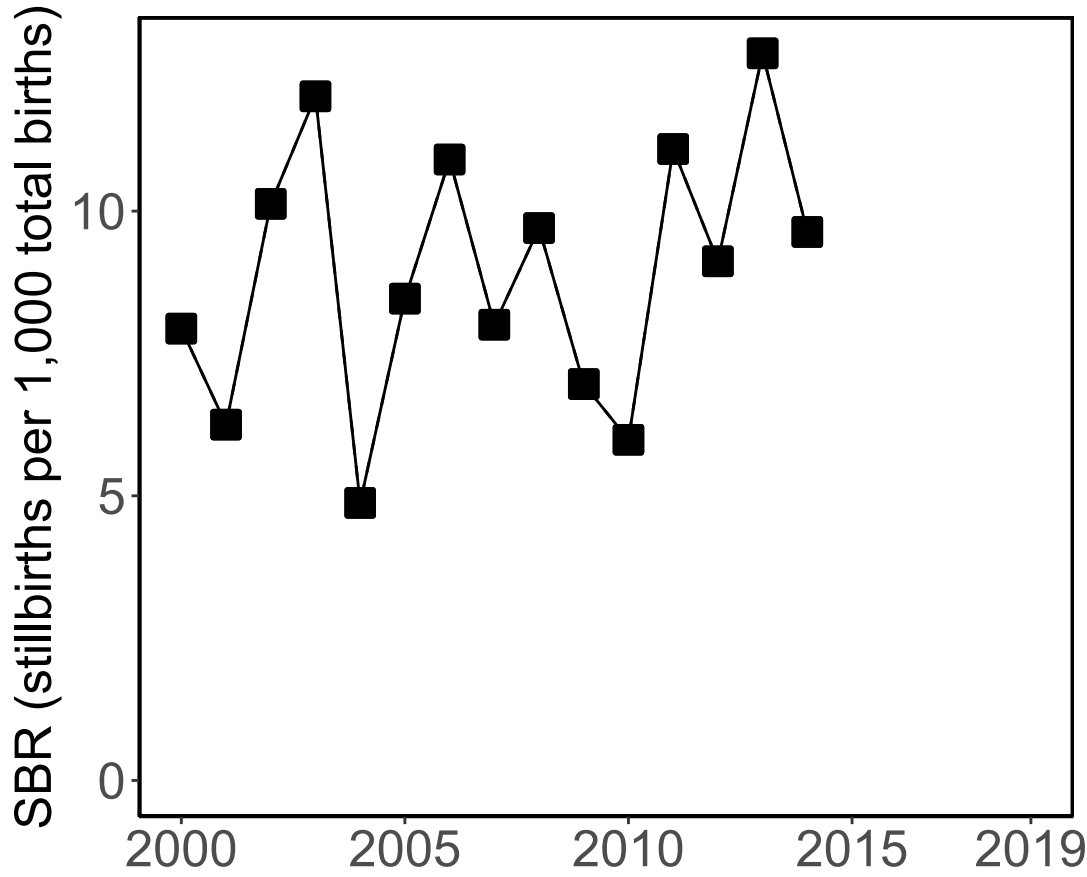

### '28+ Weeks of Gestation' Data (Incl. Adjusted Data)

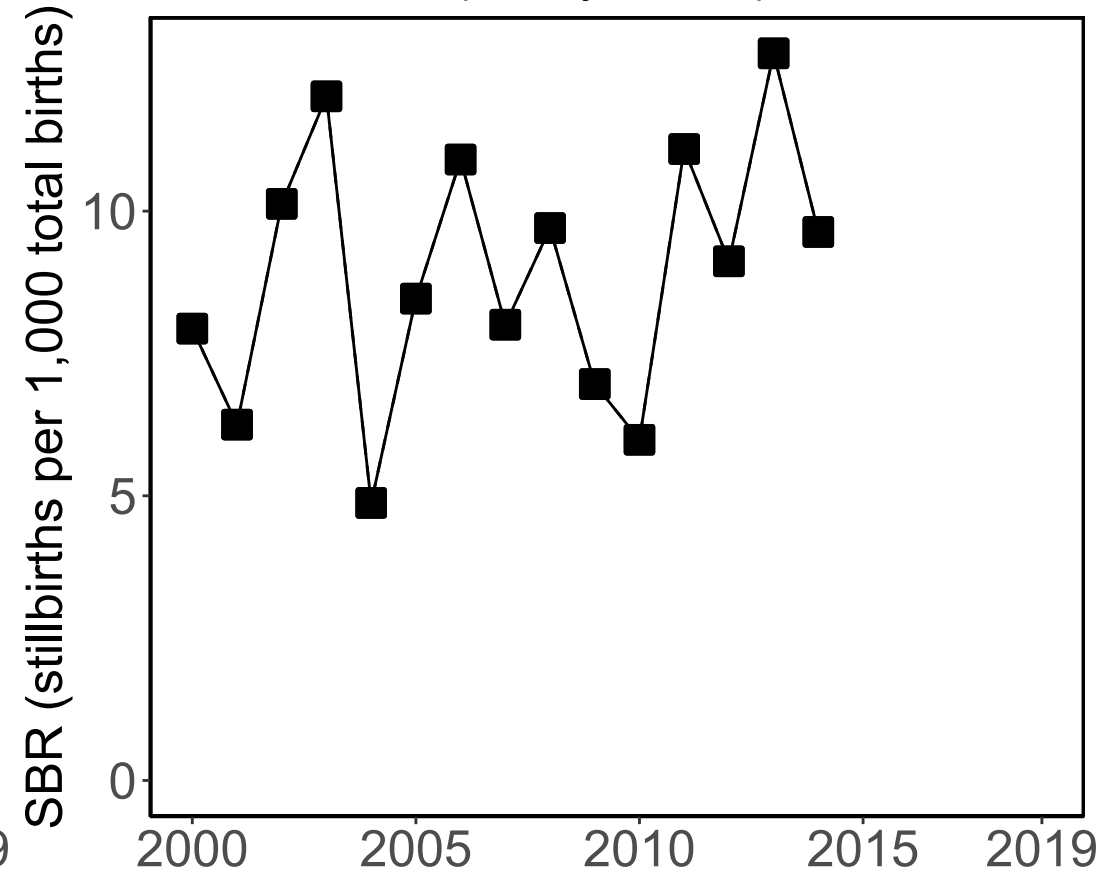

### Data Included in the Model

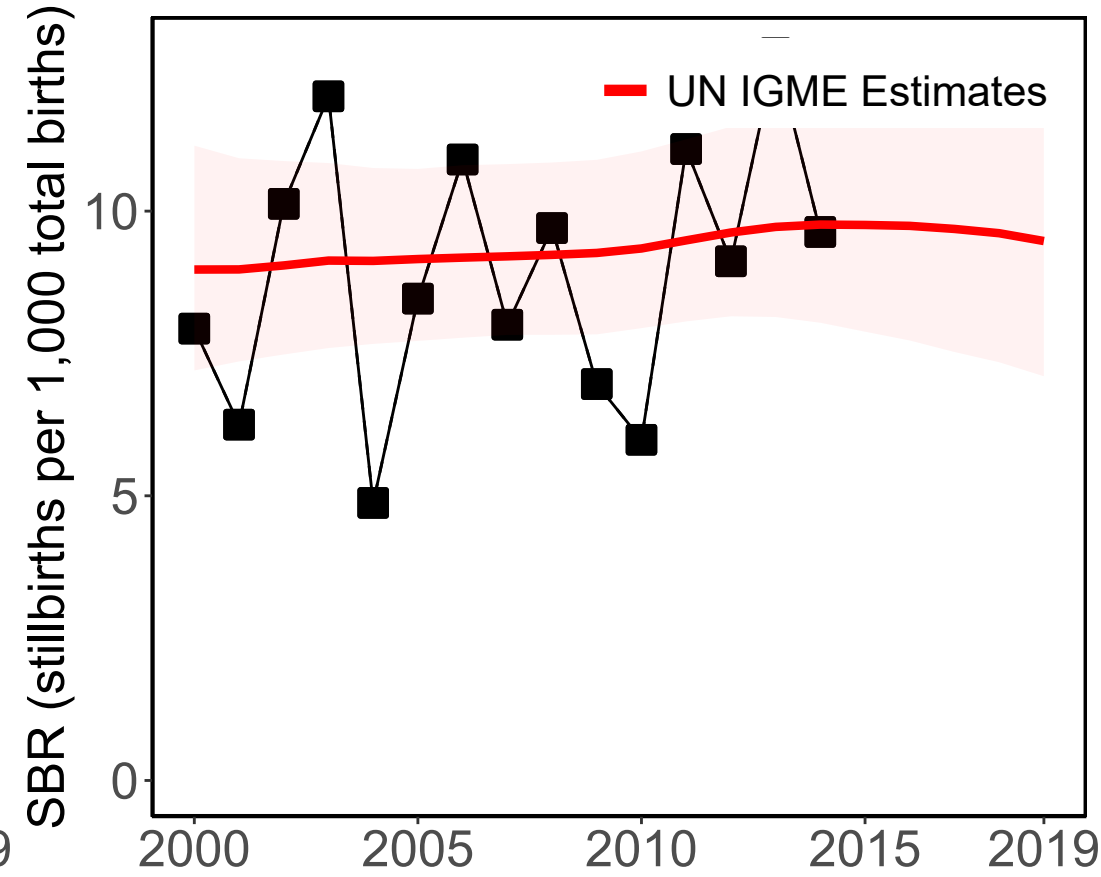

#### Source Types

□ Administrative

#### Data Sources

■ Vital Registration (28wks)

# Syrian Arab Republic

## Available Data

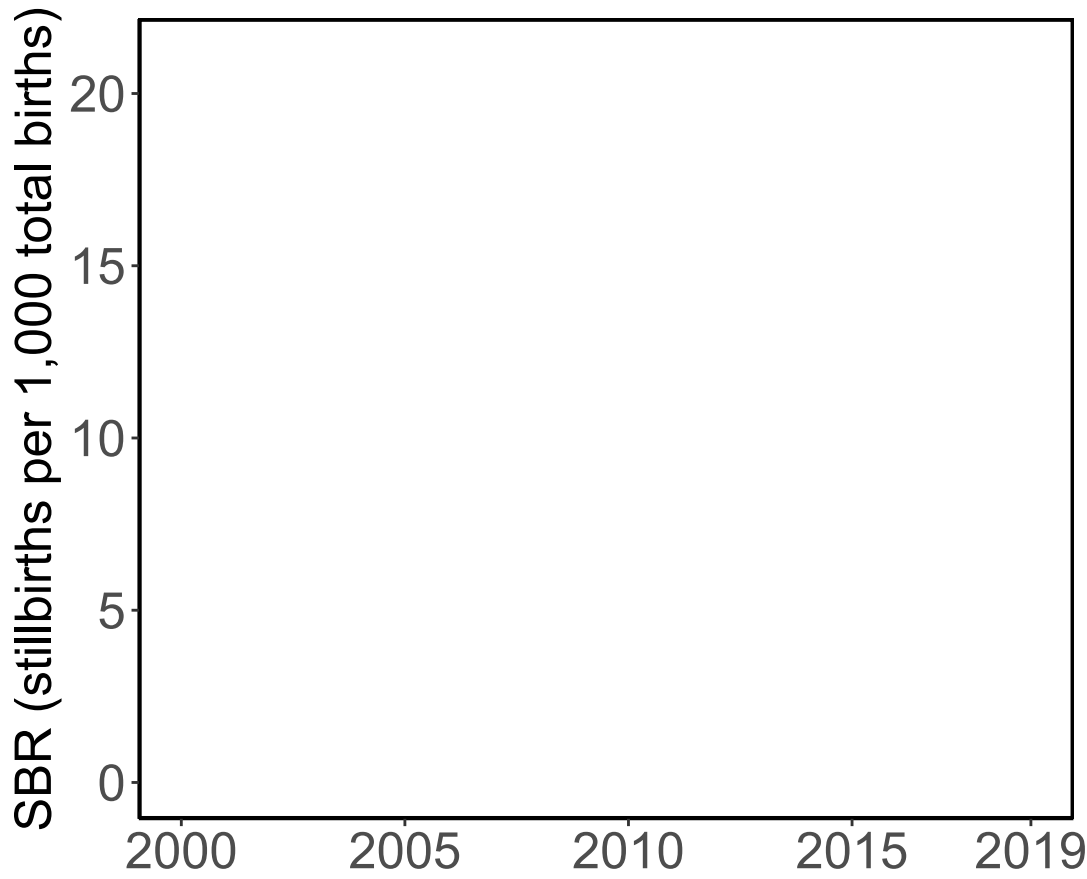

## '28+ Weeks of Gestation' Data (Incl. Adjusted Data)

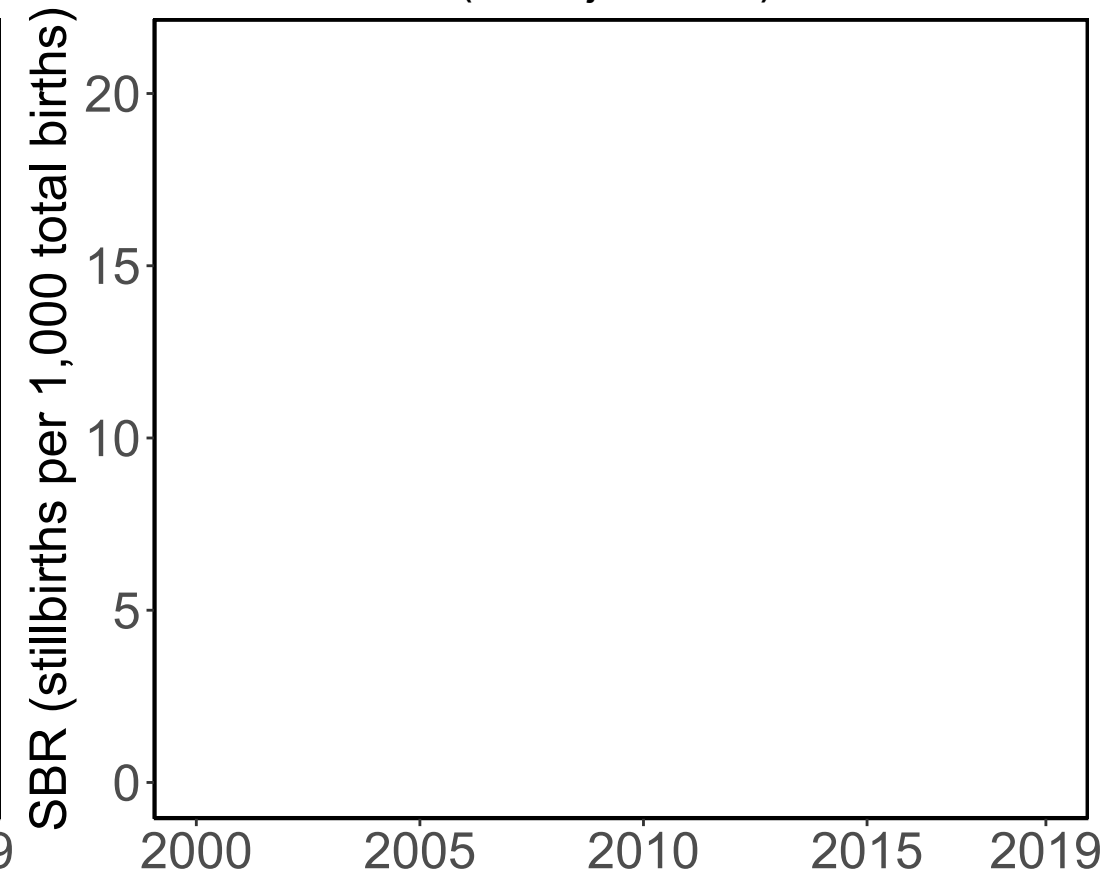

## Data Included in the Model

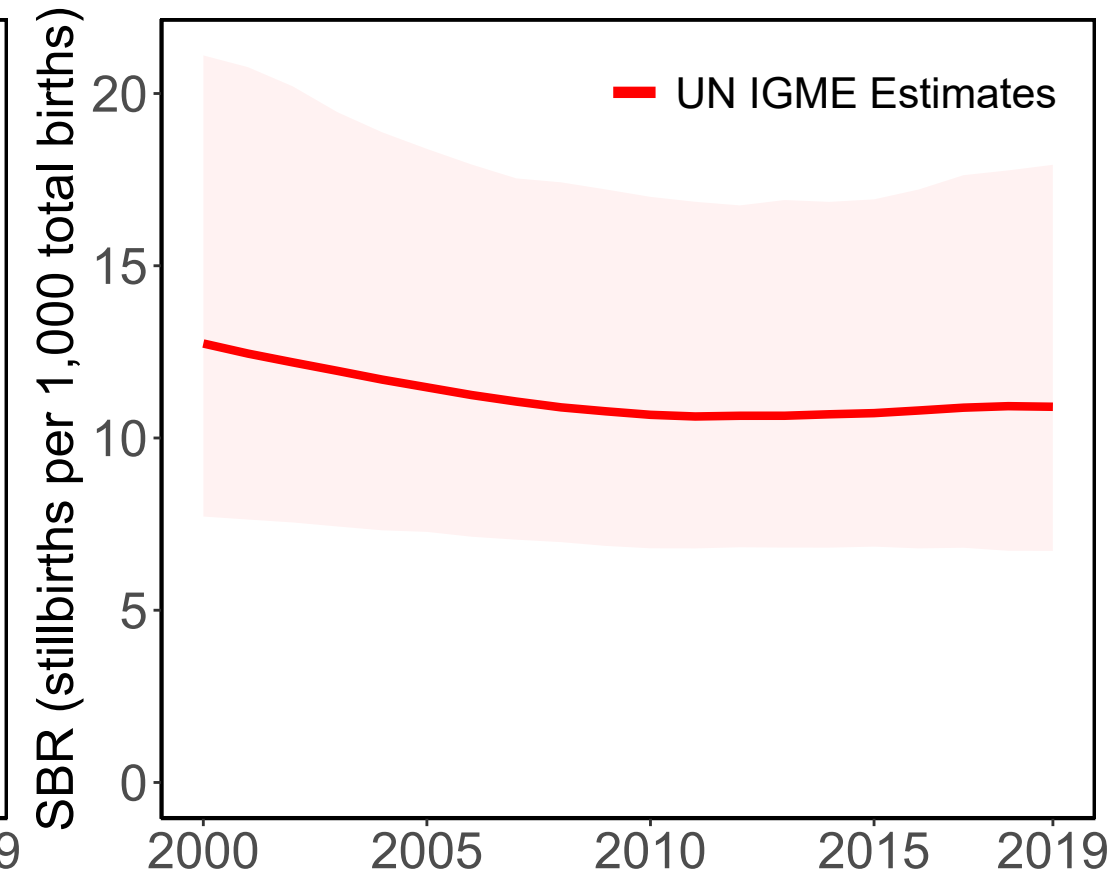

# Chad

### Available Data

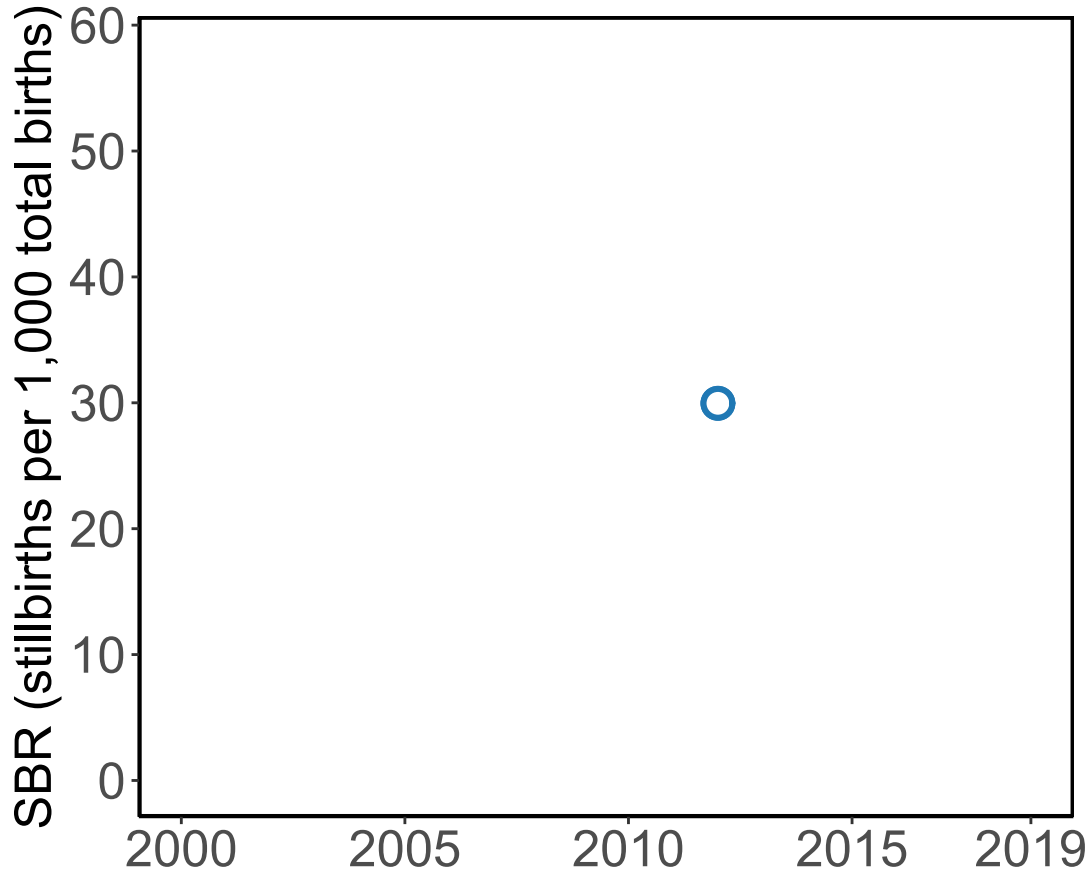

### '28+ Weeks of Gestation' Data (Incl. Adjusted Data)

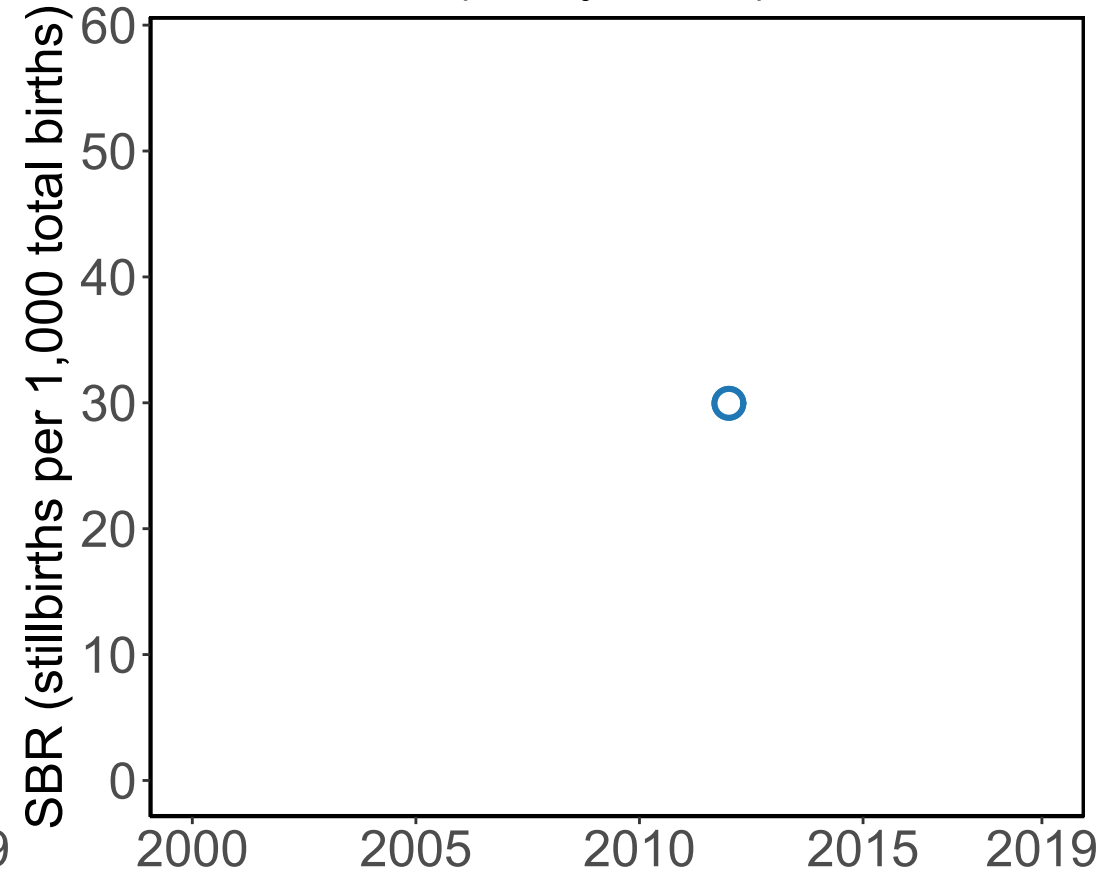

### Data Included in the Model

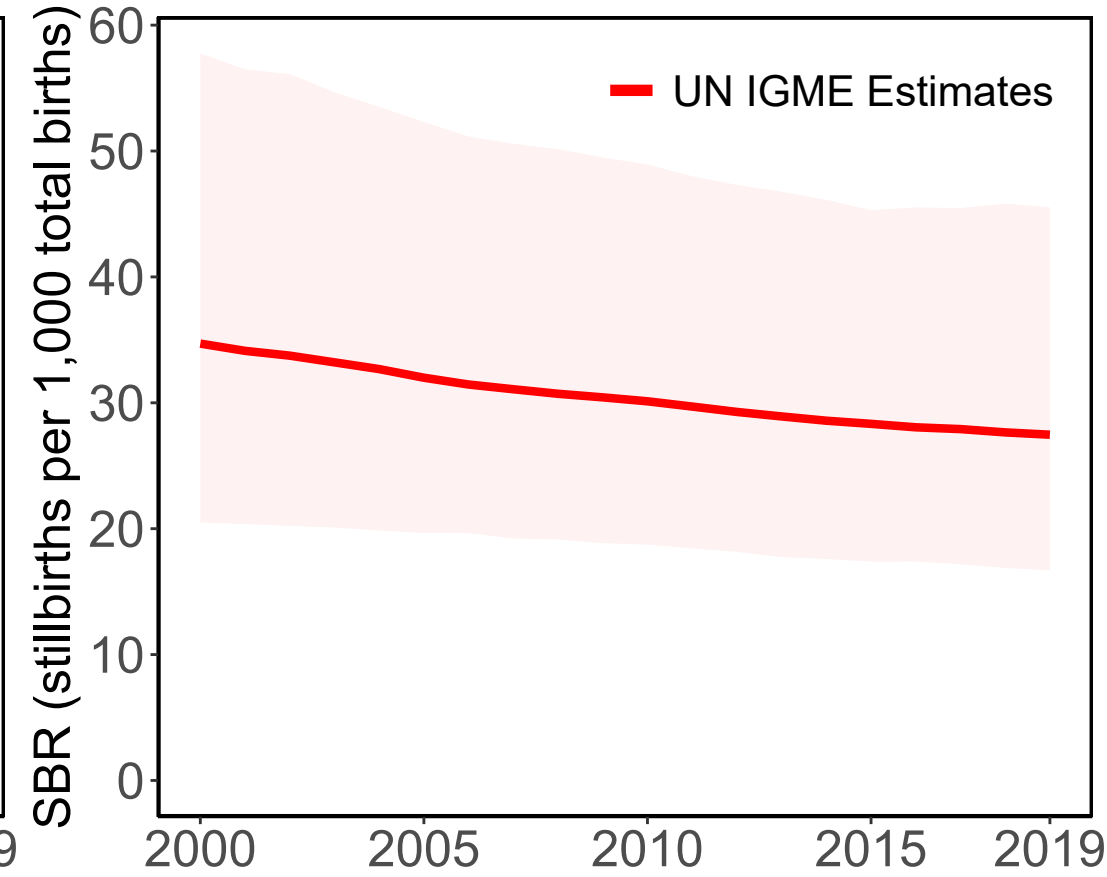

#### Source Types



HMIS

#### Data Sources



HMIS-DHIS2 (28wks)

# Togo

### Available Data

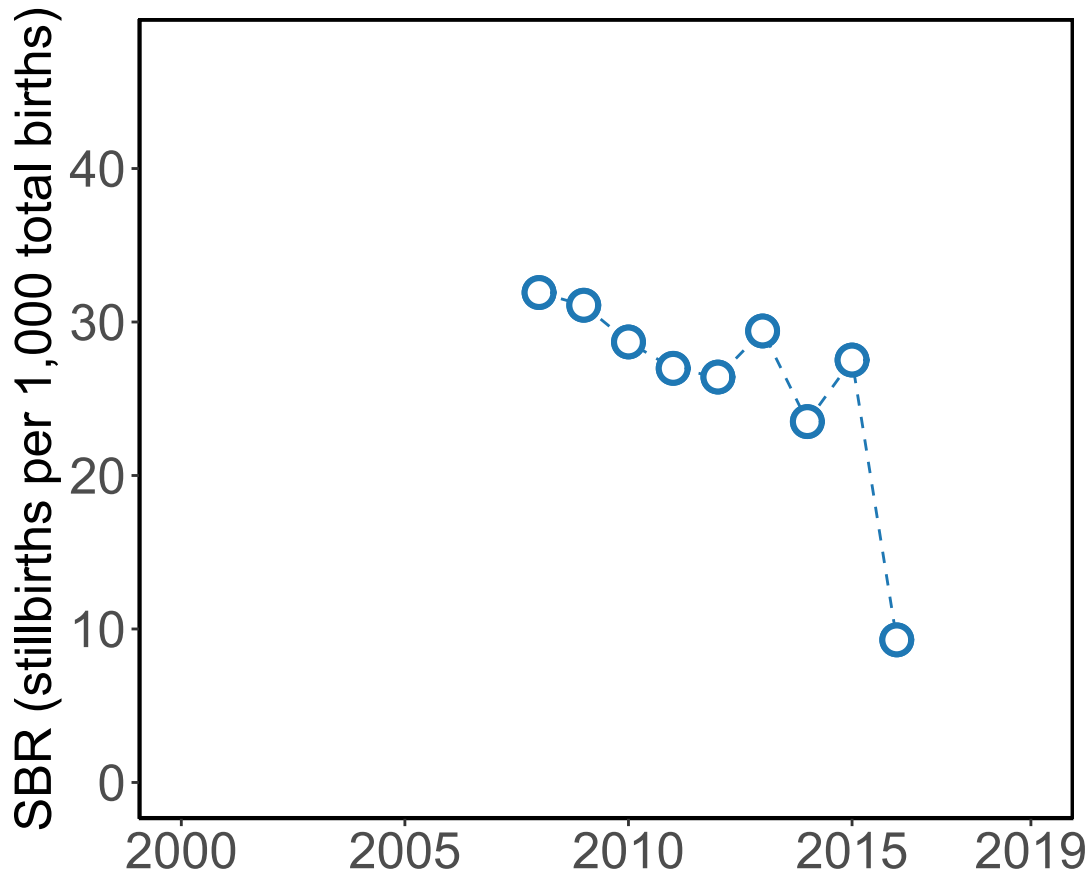

### '28+ Weeks of Gestation' Data (Incl. Adjusted Data)

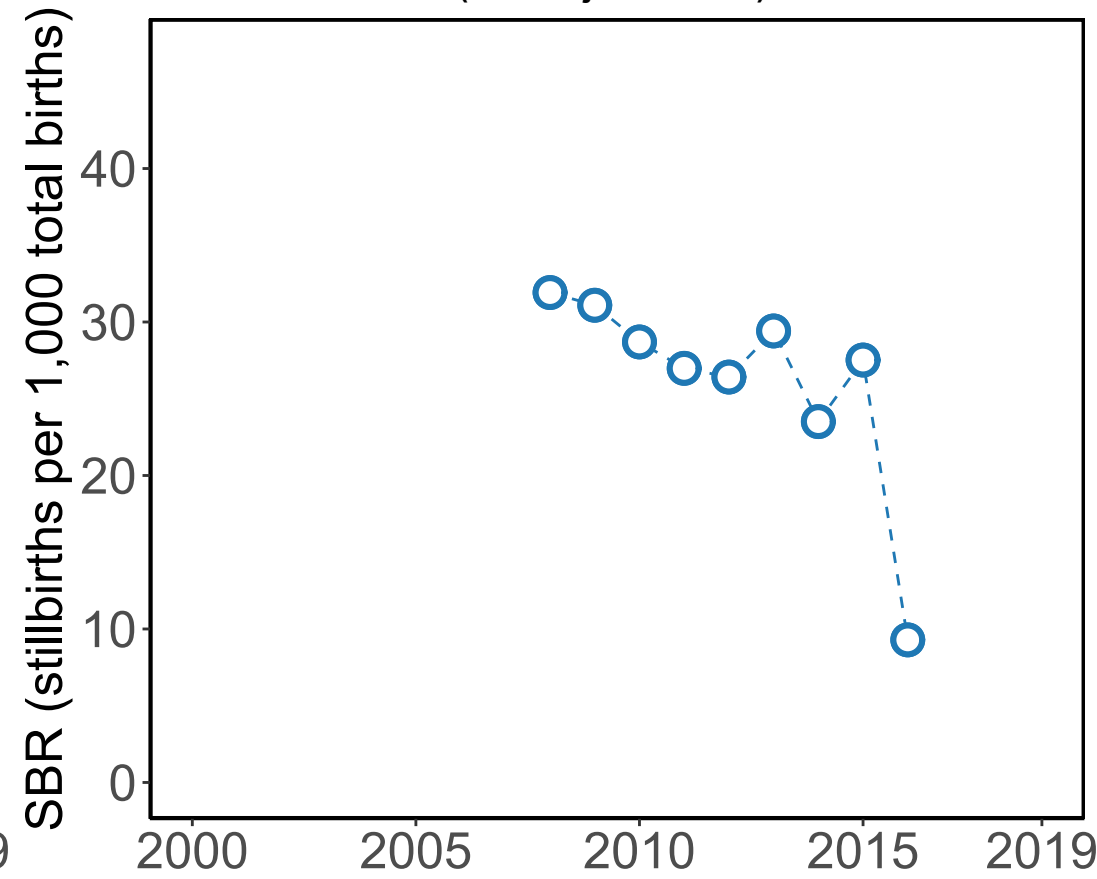

### Data Included in the Model

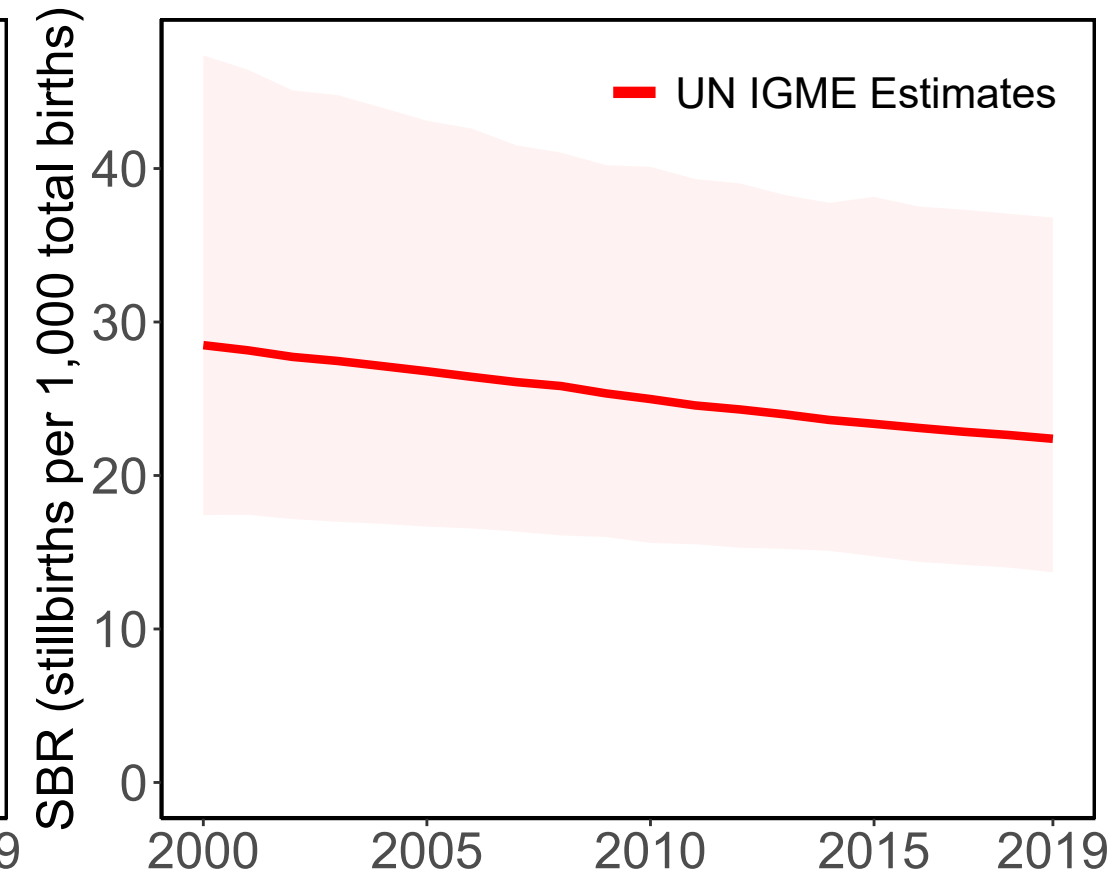

#### Source Types



#### Data Sources

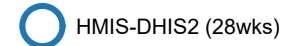

# Thailand

### Available Data

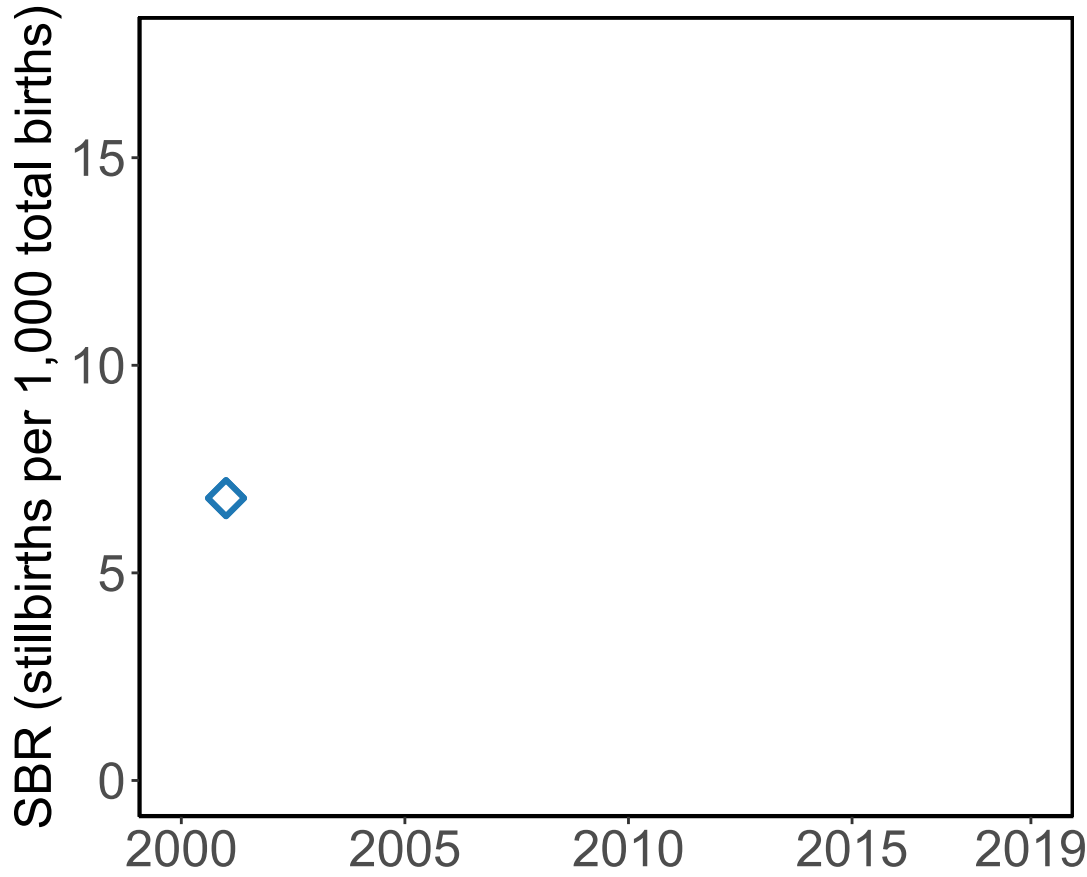

### '28+ Weeks of Gestation' Data (Incl. Adjusted Data)

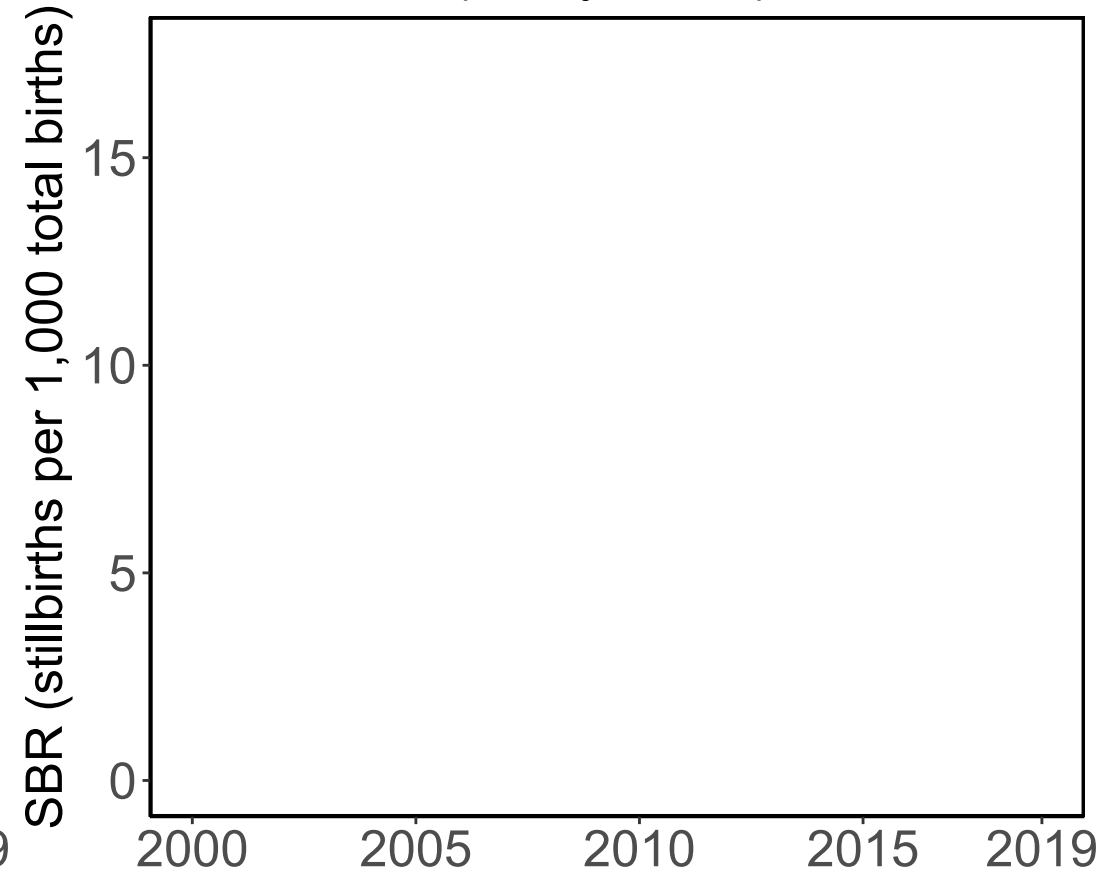

### Data Included in the Model

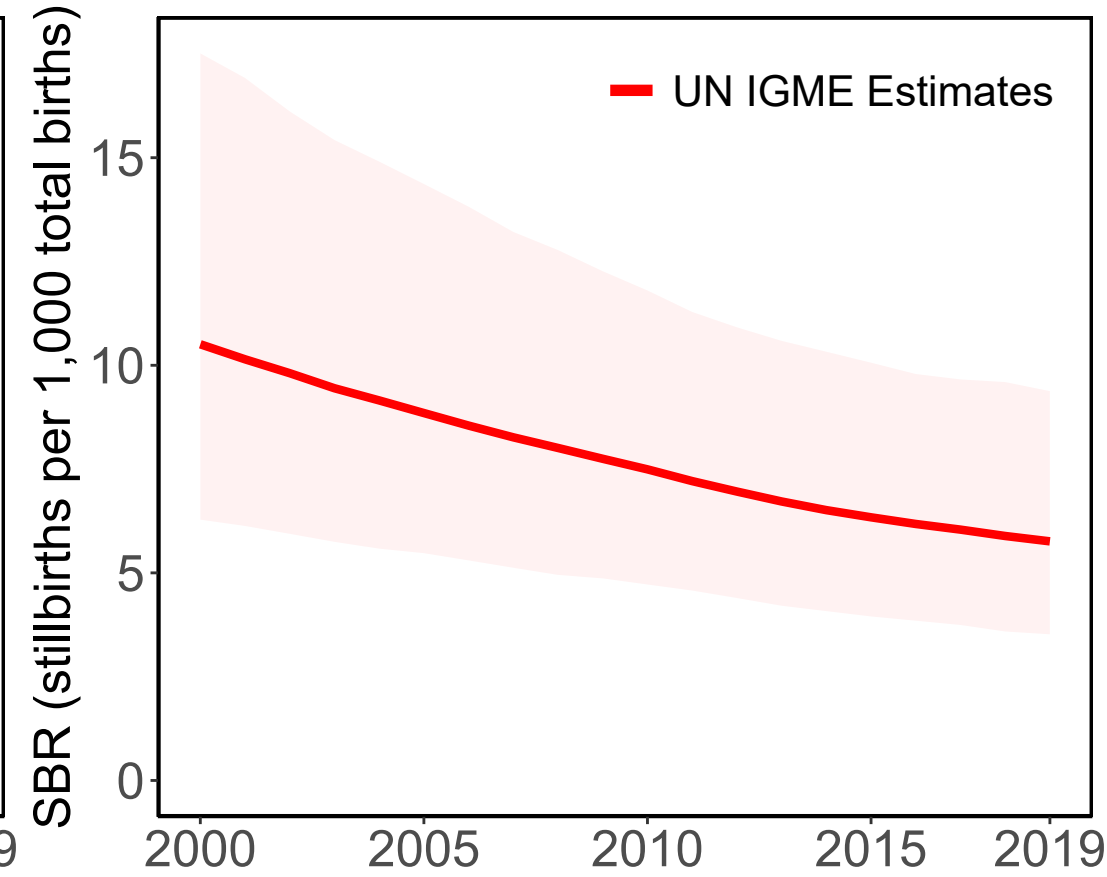

#### Source Types

◇ Population study

#### Data Sources

◇ Mo-suwan 2009 (28-40 wks)

# Tajikistan

Available Data

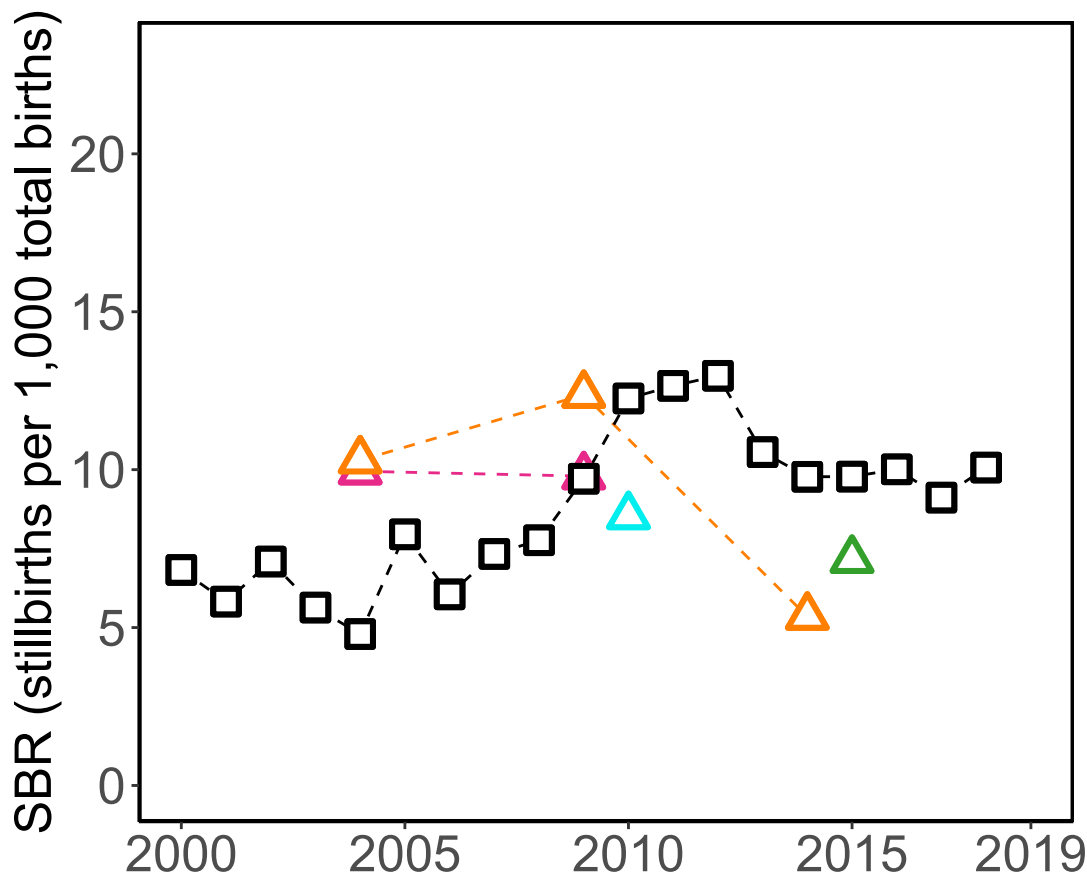

'28+ Weeks of Gestation' Data  
(Incl. Adjusted Data)

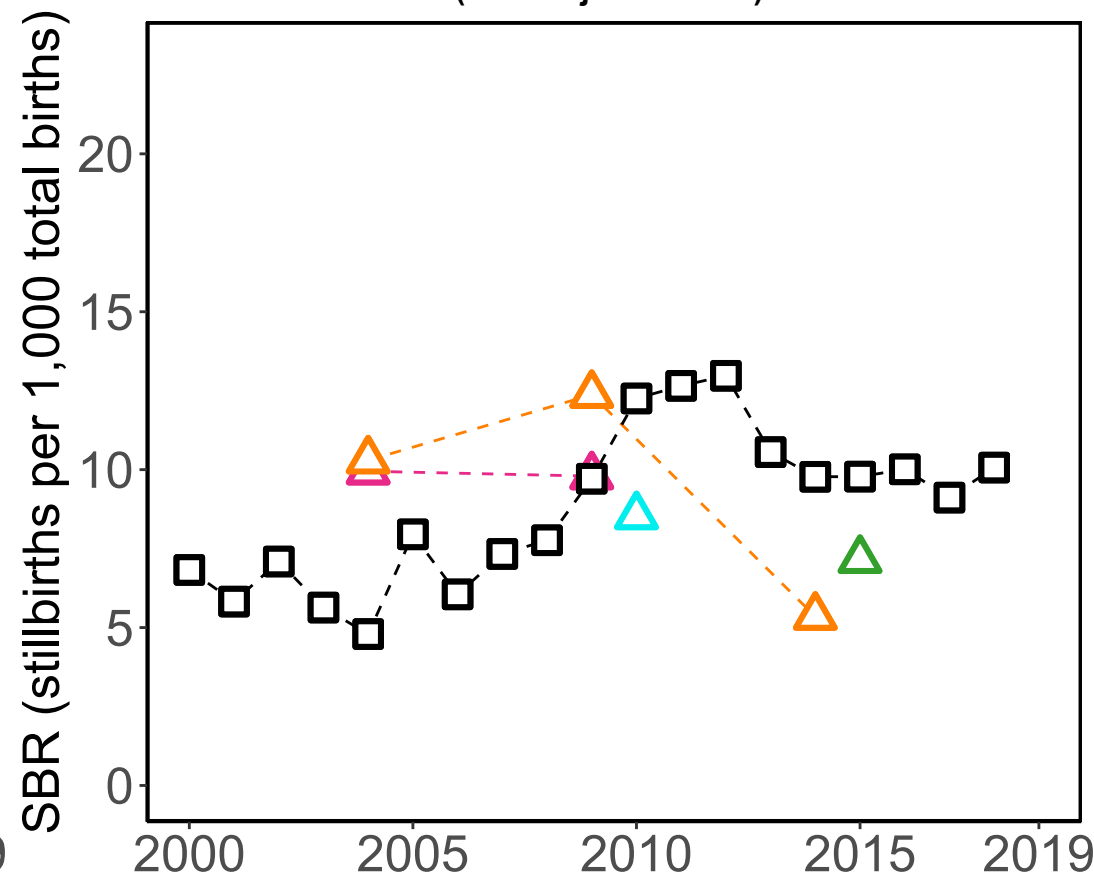

Data Included in the Model

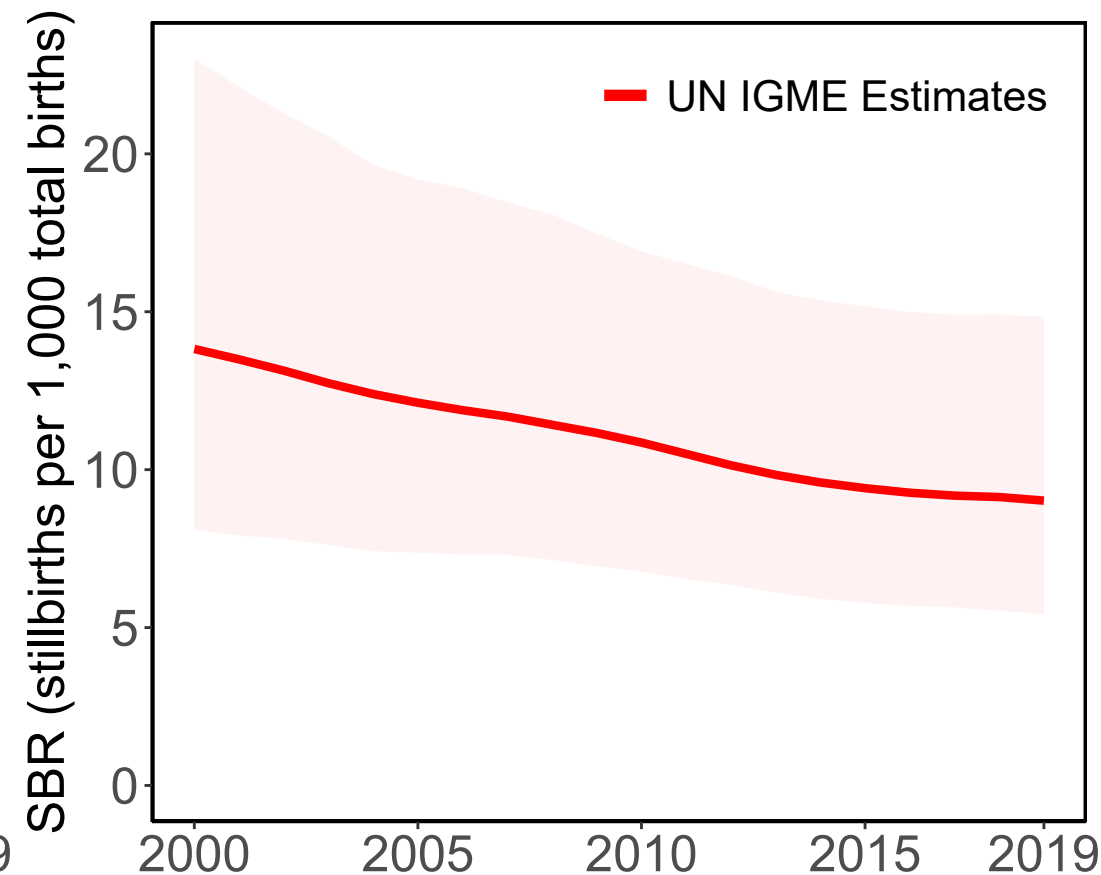

Source Types

□ Administrative    △ Survey

Data Sources

□ Vital Registration (28wks)

△ Demographic and Health Survey 2017 (DHS) (RC) (28wks)

△ Demographic and Health Survey 2012 (DHS) (RC) (28wks)

△ Demographic and Health Survey 2017 (DHS) (PH) (28wks)

△ Demographic and Health Survey 2012 (DHS) (PH) (28wks)



# Turkmenistan

### Available Data

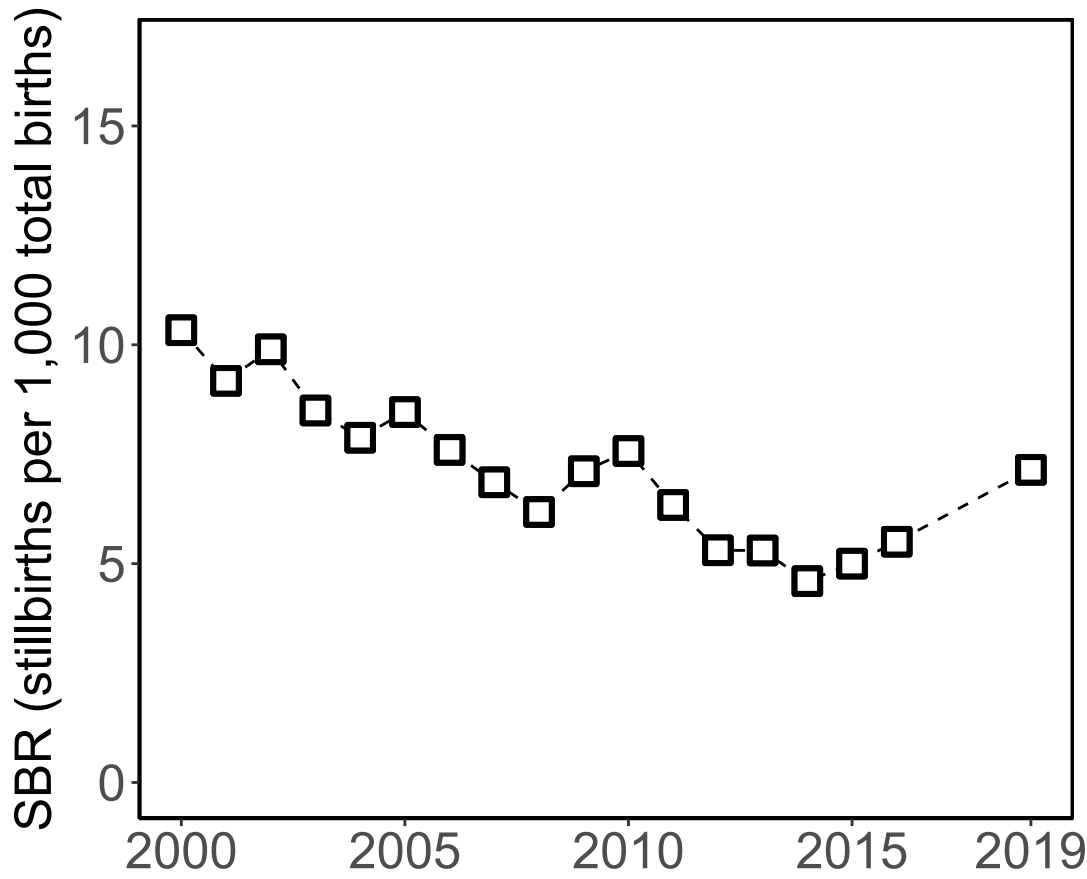

### '28+ Weeks of Gestation' Data (Incl. Adjusted Data)

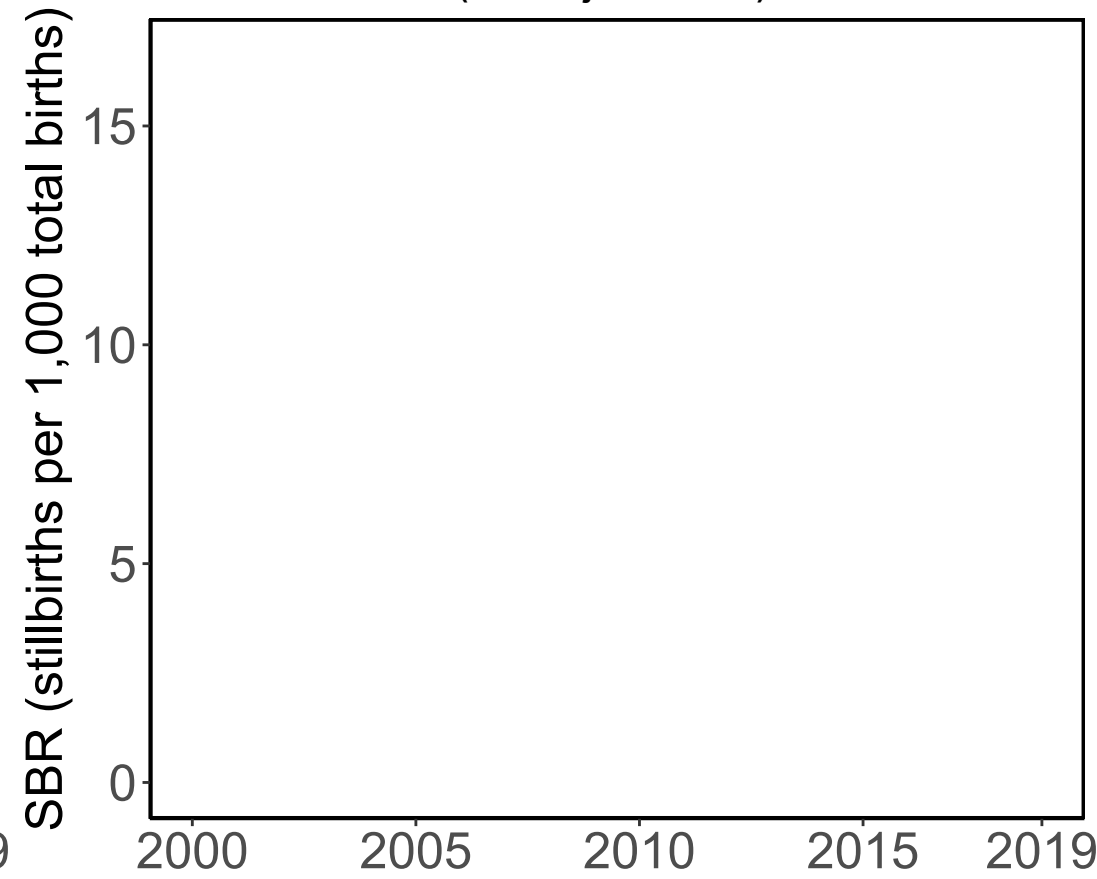

### Data Included in the Model

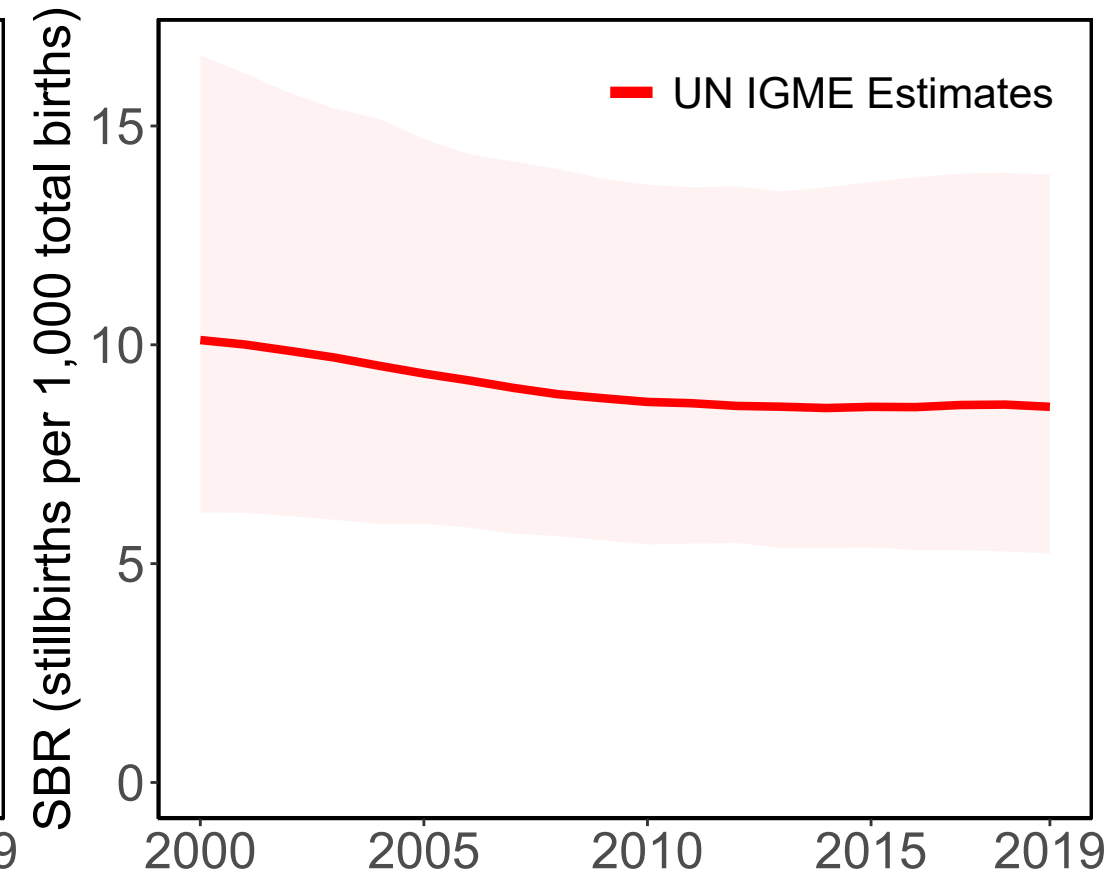

#### Source Types

Administrative

#### Data Sources

Vital Registration (not defined)

# Timor-Leste

### Available Data

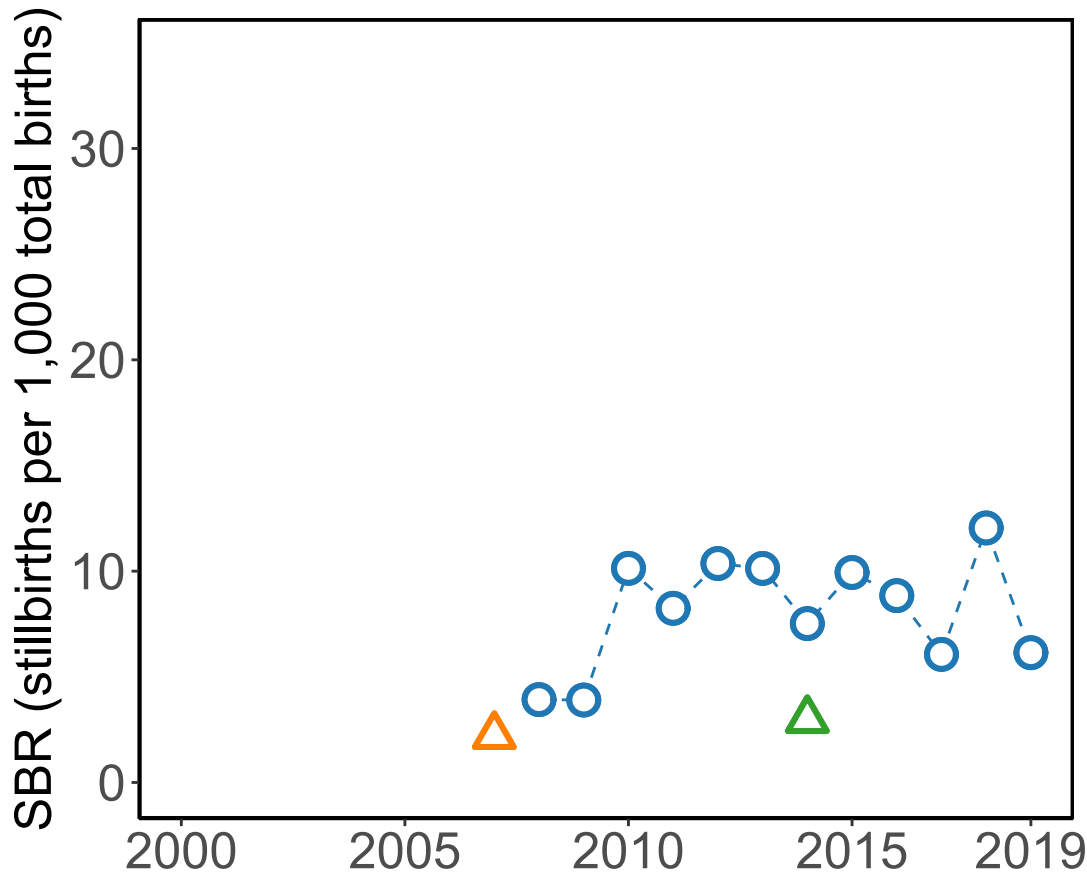

### '28+ Weeks of Gestation' Data (Incl. Adjusted Data)

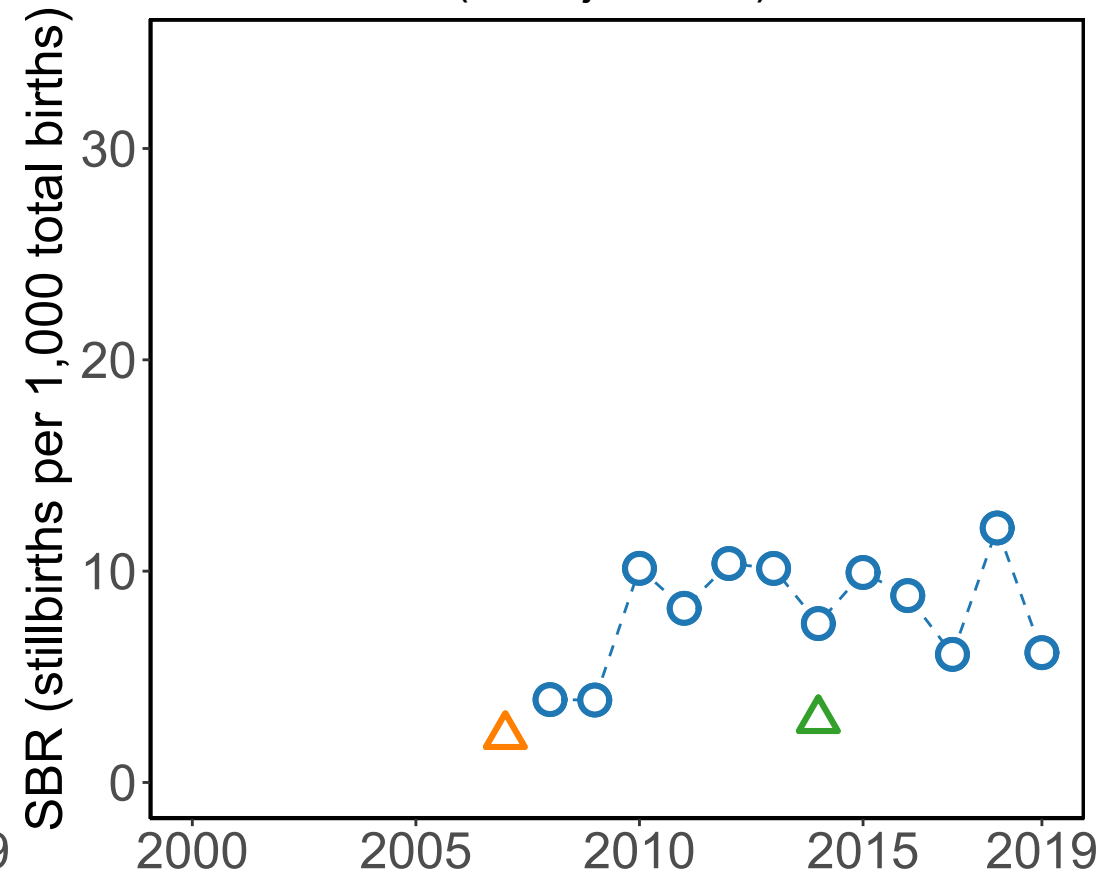

### Data Included in the Model

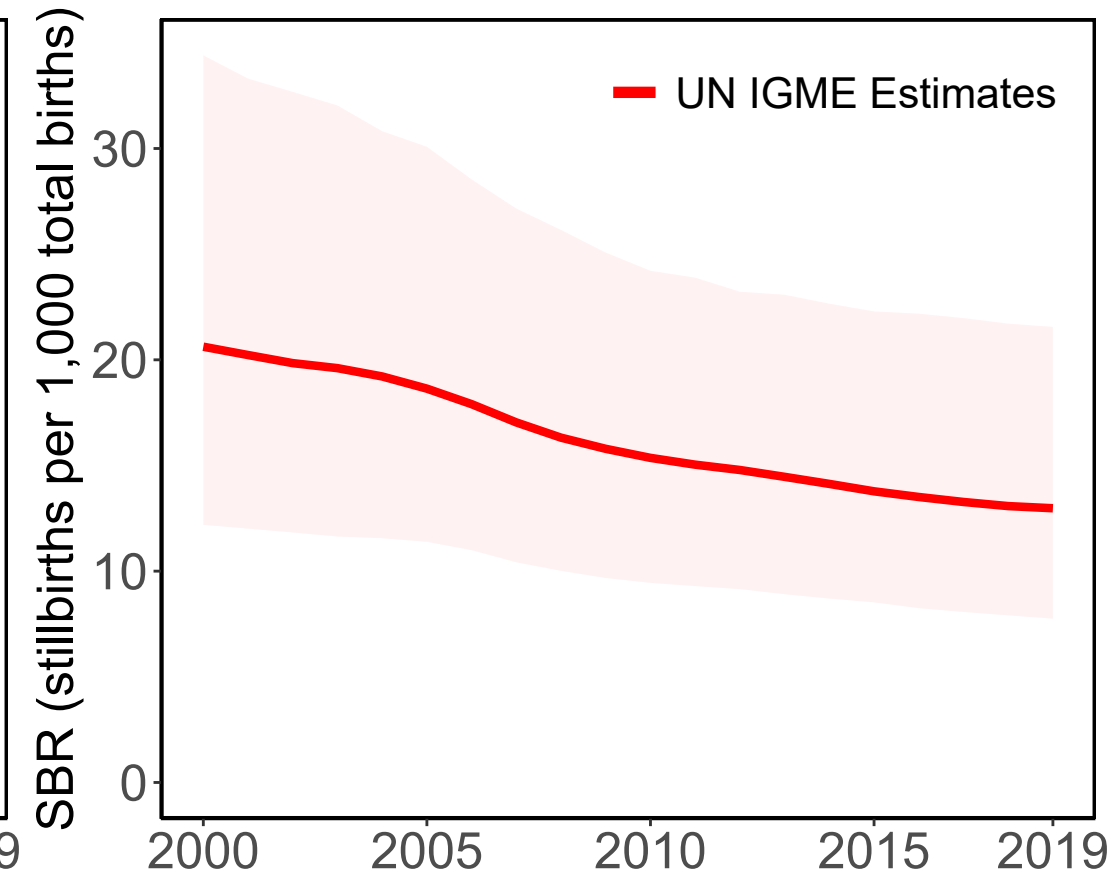

#### Source Types

○ HMIS △ Survey

#### Data Sources

○ HMIS-DHIS2 (28wks)

△ Demographic and Health Survey 2016 (DHS) (RC) (28wks)

△ Demographic and Health Survey 2009-10 (DHS) (RC) (28wks)

# Tonga

Available Data

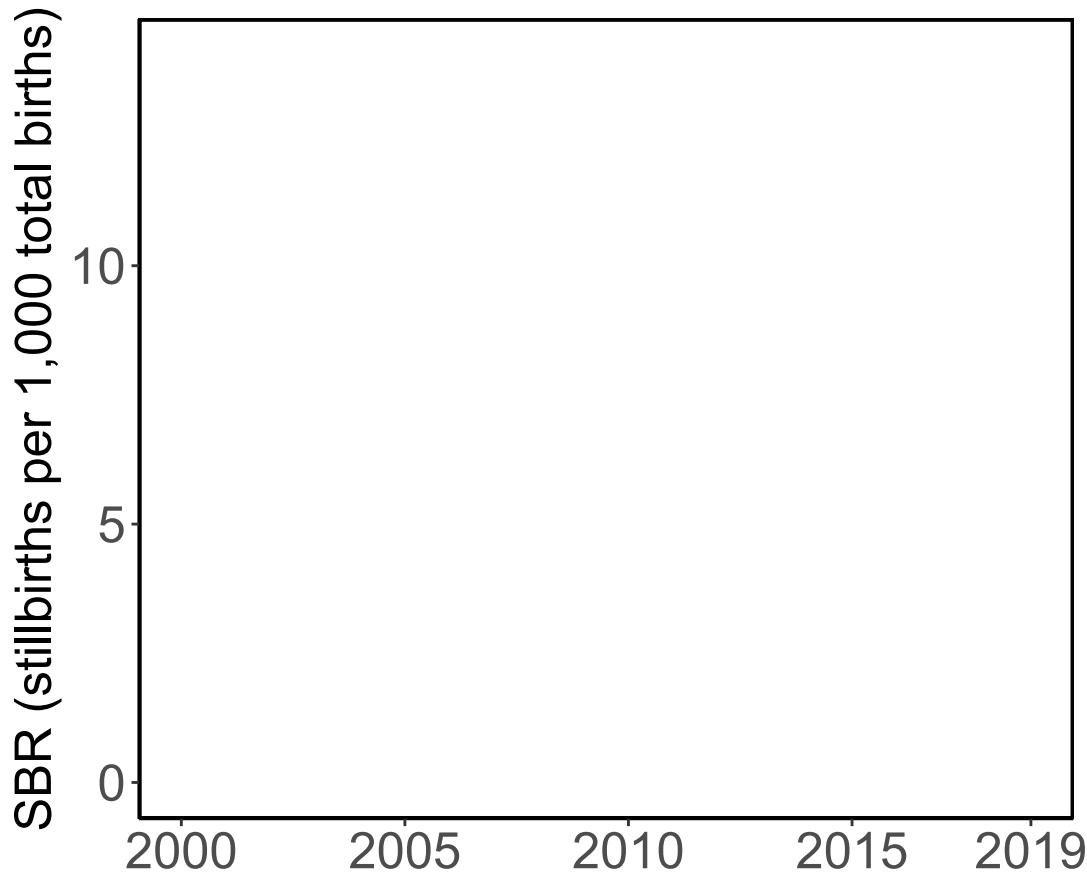

'28+ Weeks of Gestation' Data  
(Incl. Adjusted Data)

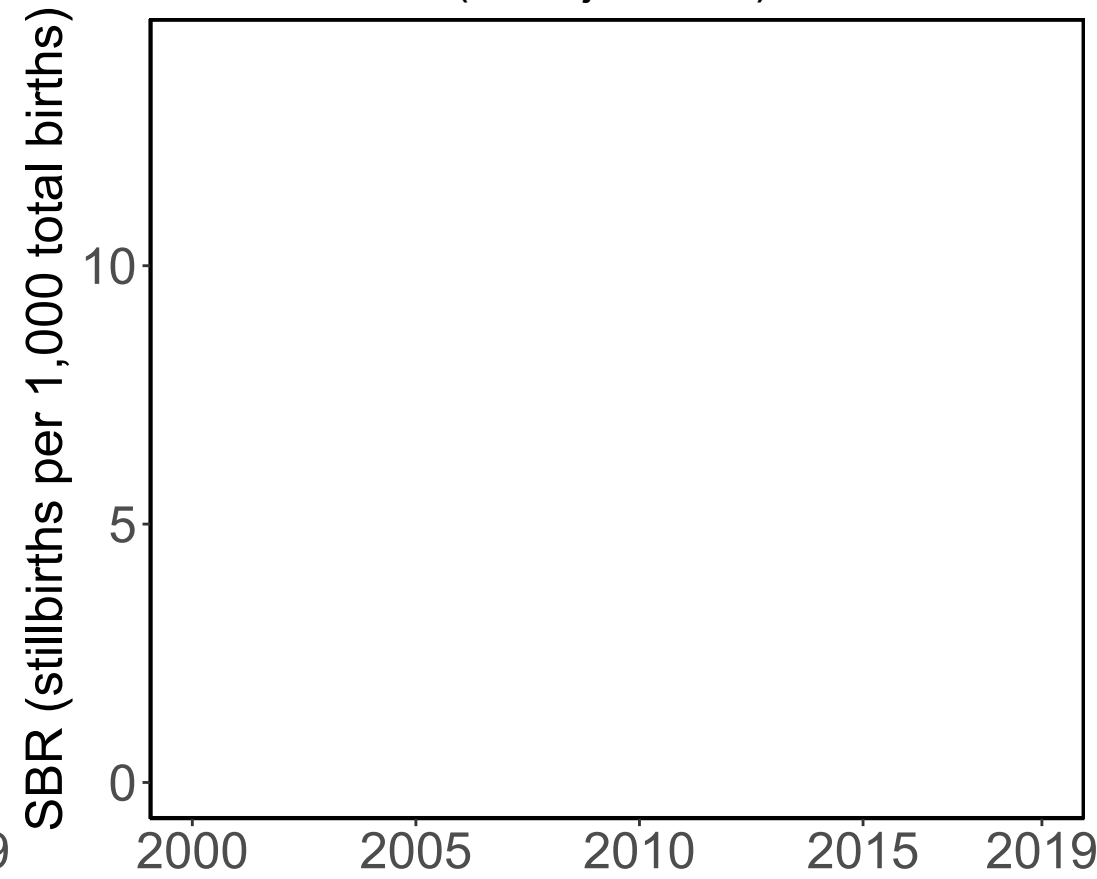

Data Included in the Model

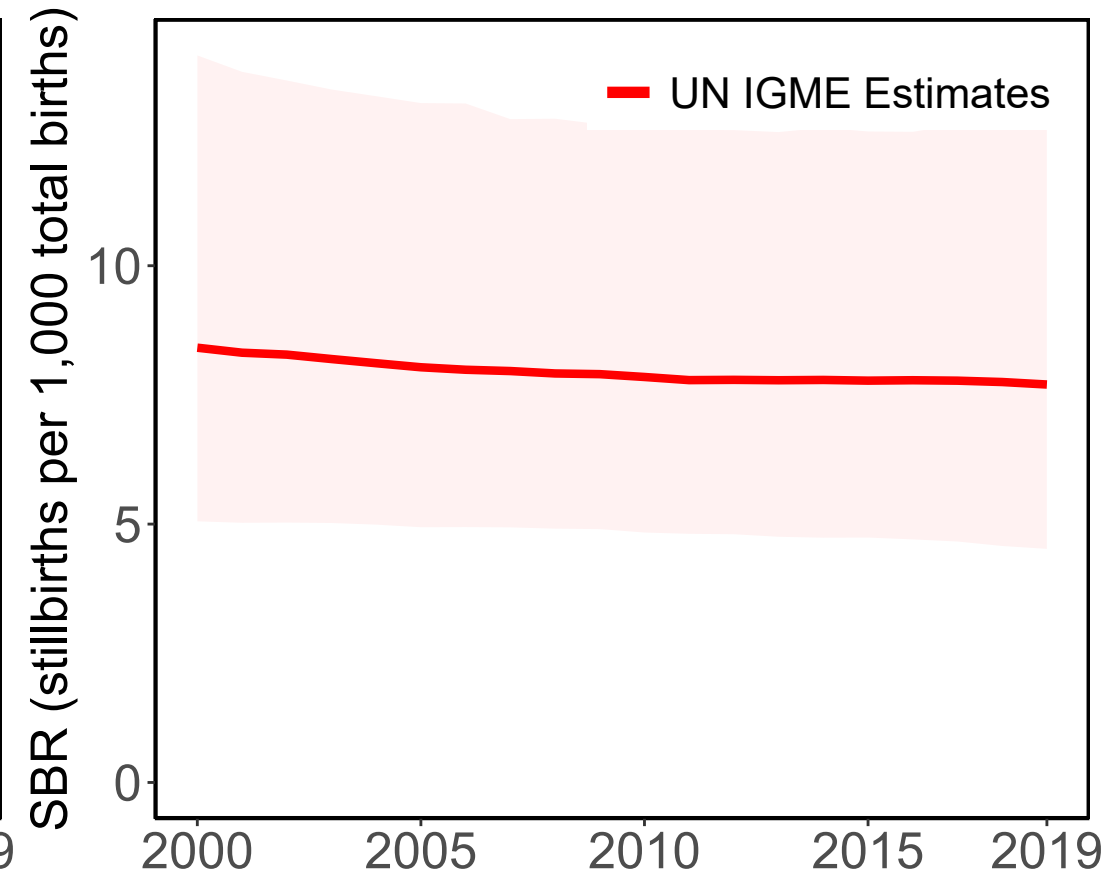

# Trinidad and Tobago

Available Data

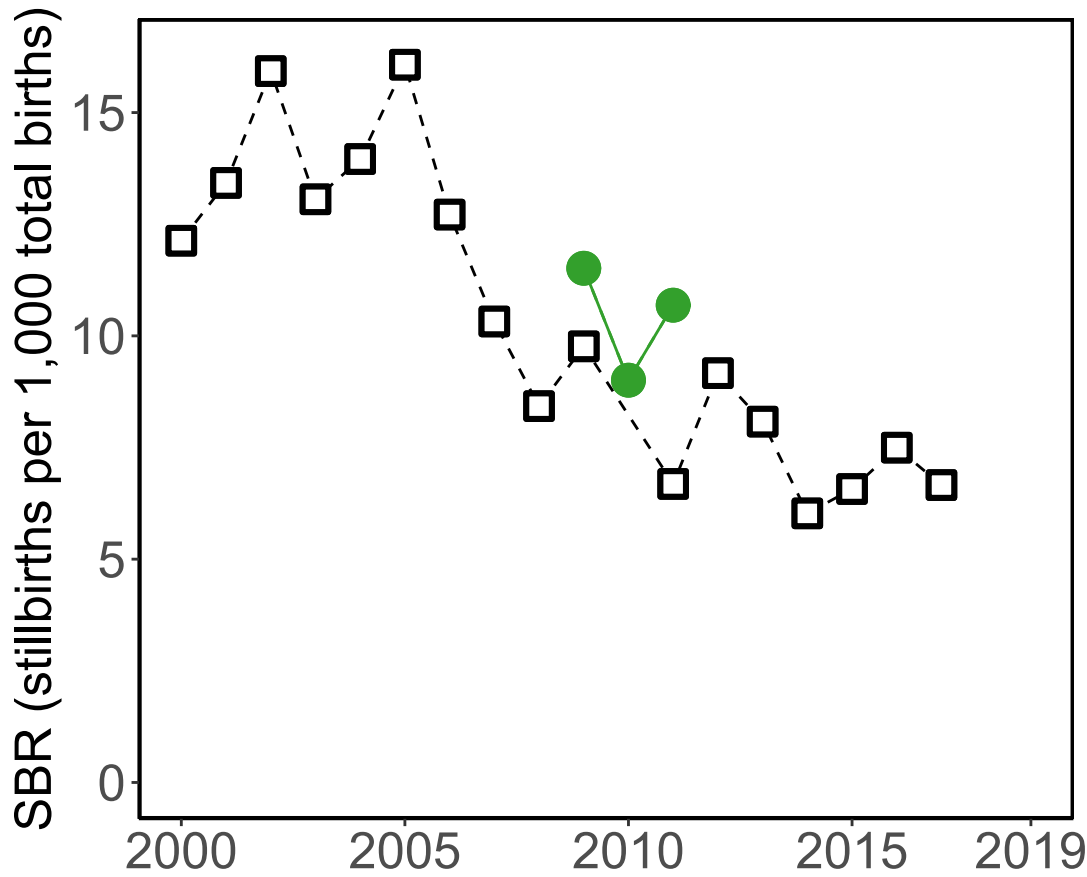

'28+ Weeks of Gestation' Data  
(Incl. Adjusted Data)

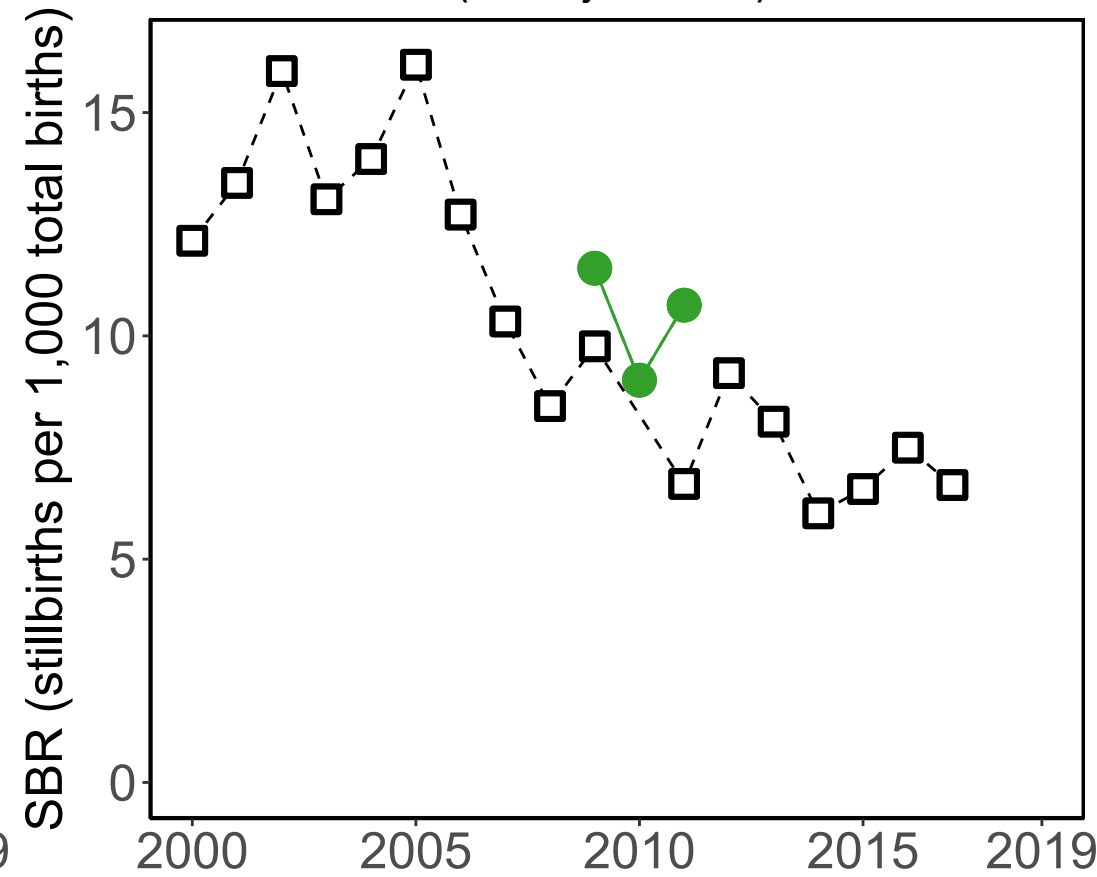

Data Included in the Model

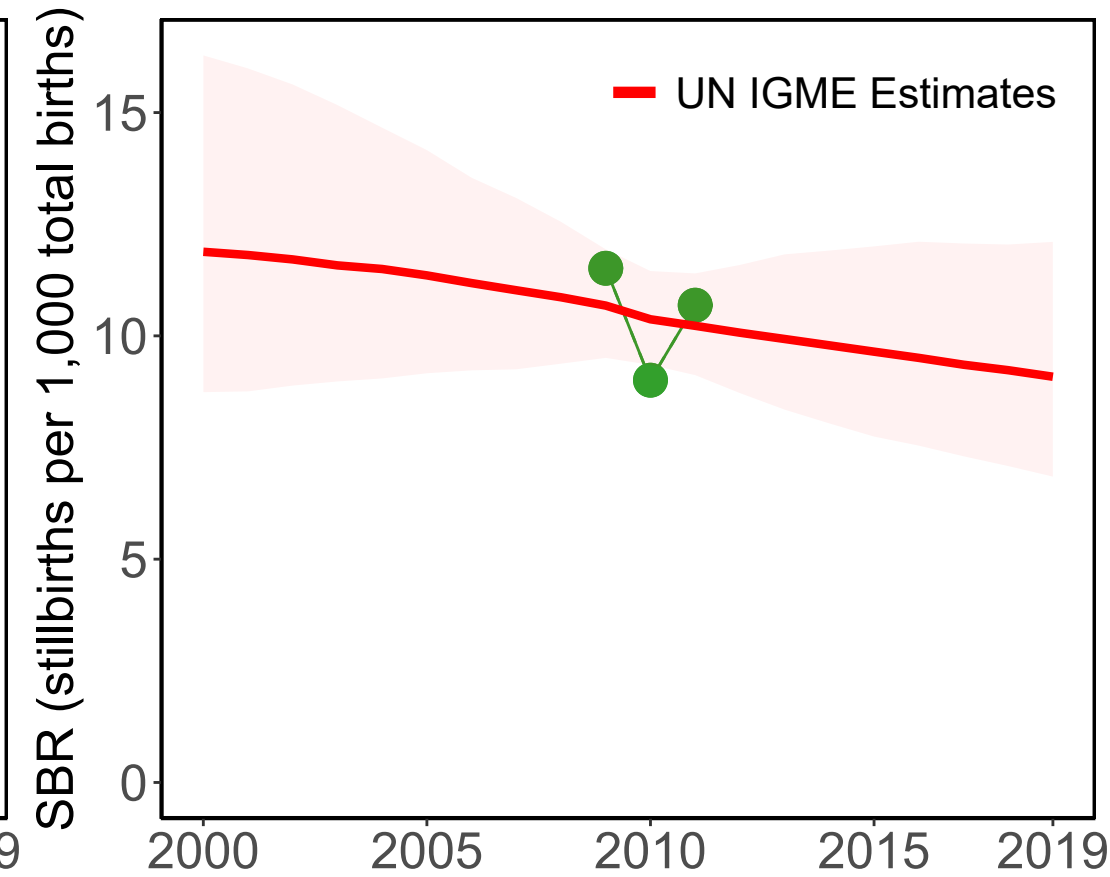

Source Types

- Administrative
- HMIS

Data Sources

- Vital Registration (28wks)
- HMIS-DHIS2 (28wks)

# Tunisia

### Available Data

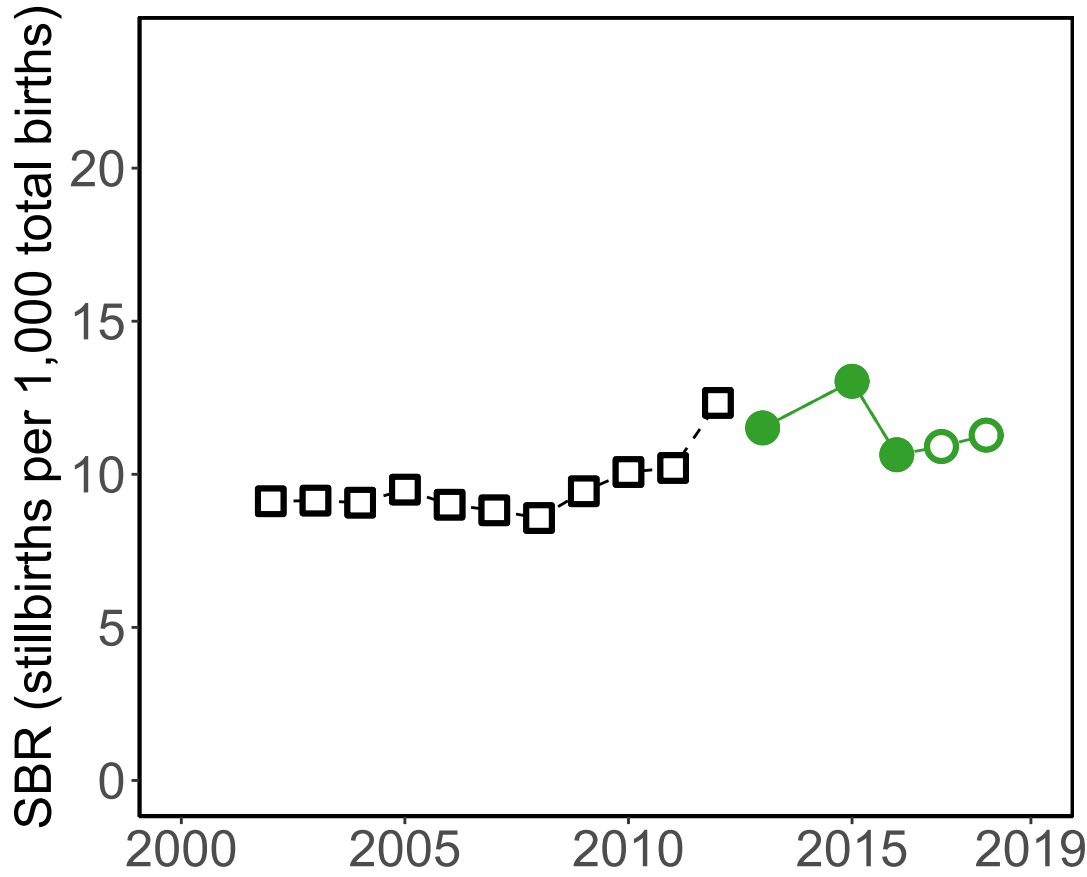

### '28+ Weeks of Gestation' Data (Incl. Adjusted Data)

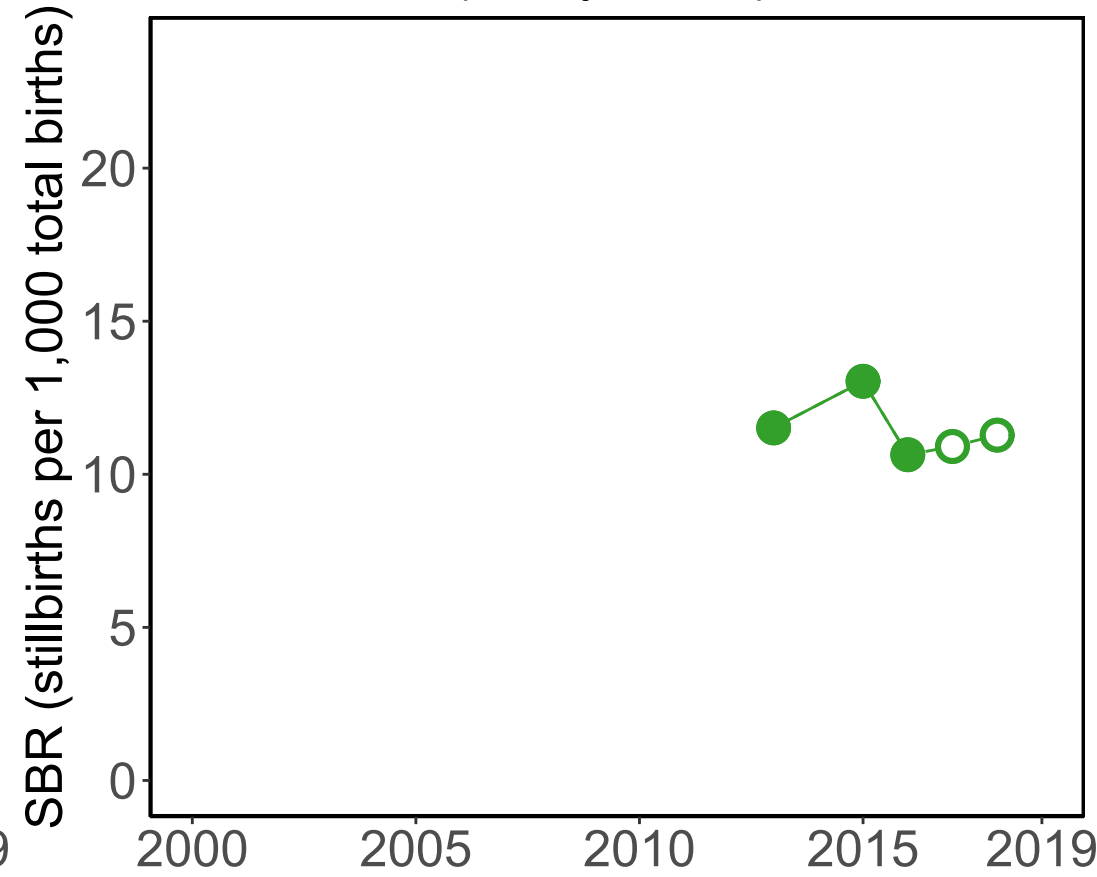

### Data Included in the Model

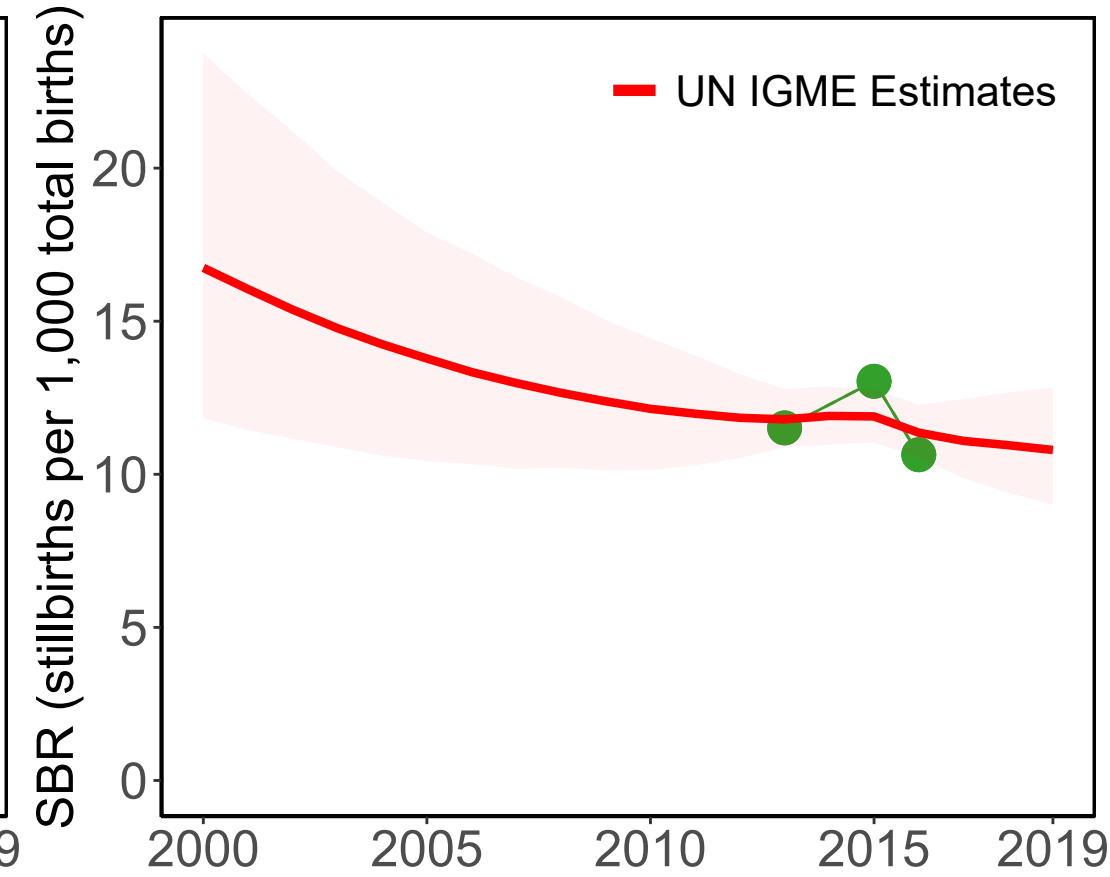

#### Source Types

□ Administrative ○ HMIS

#### Data Sources

□ Vital Registration (not defined) ● HMIS-DHIS2 (28wks)

# Turkey

Available Data

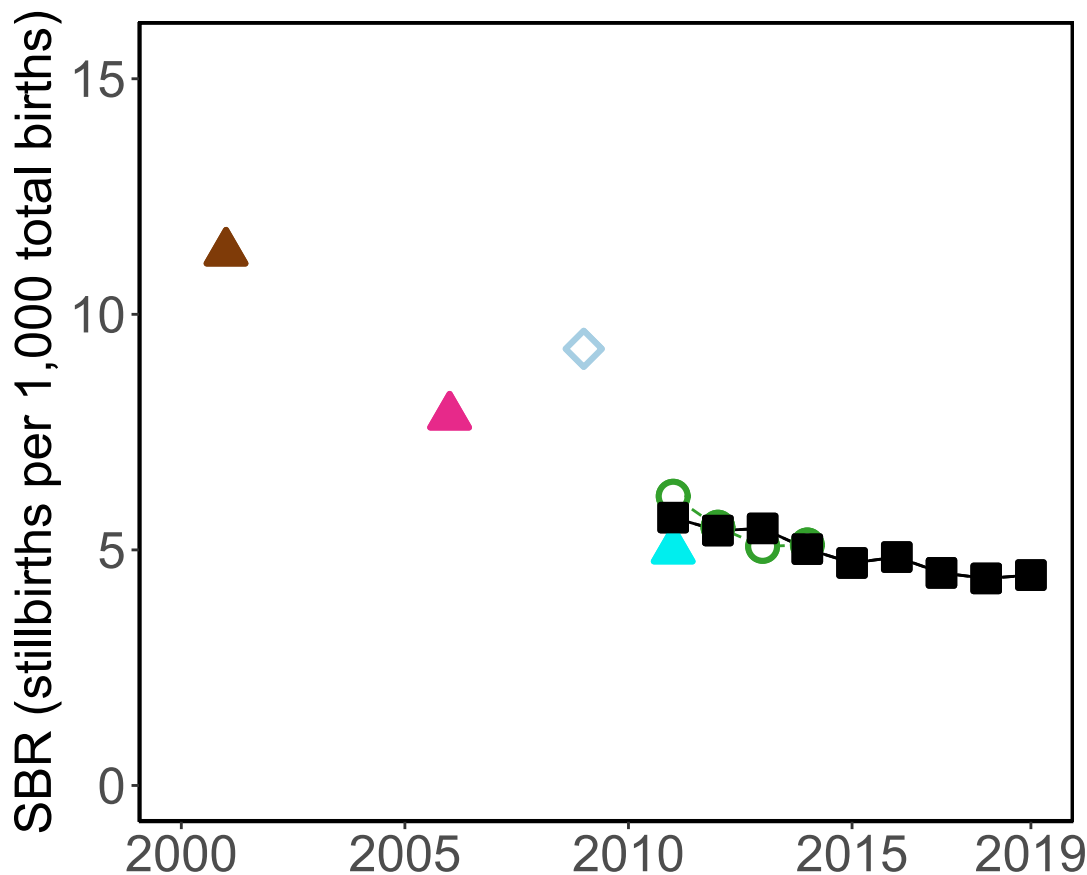

'28+ Weeks of Gestation' Data  
(Incl. Adjusted Data)

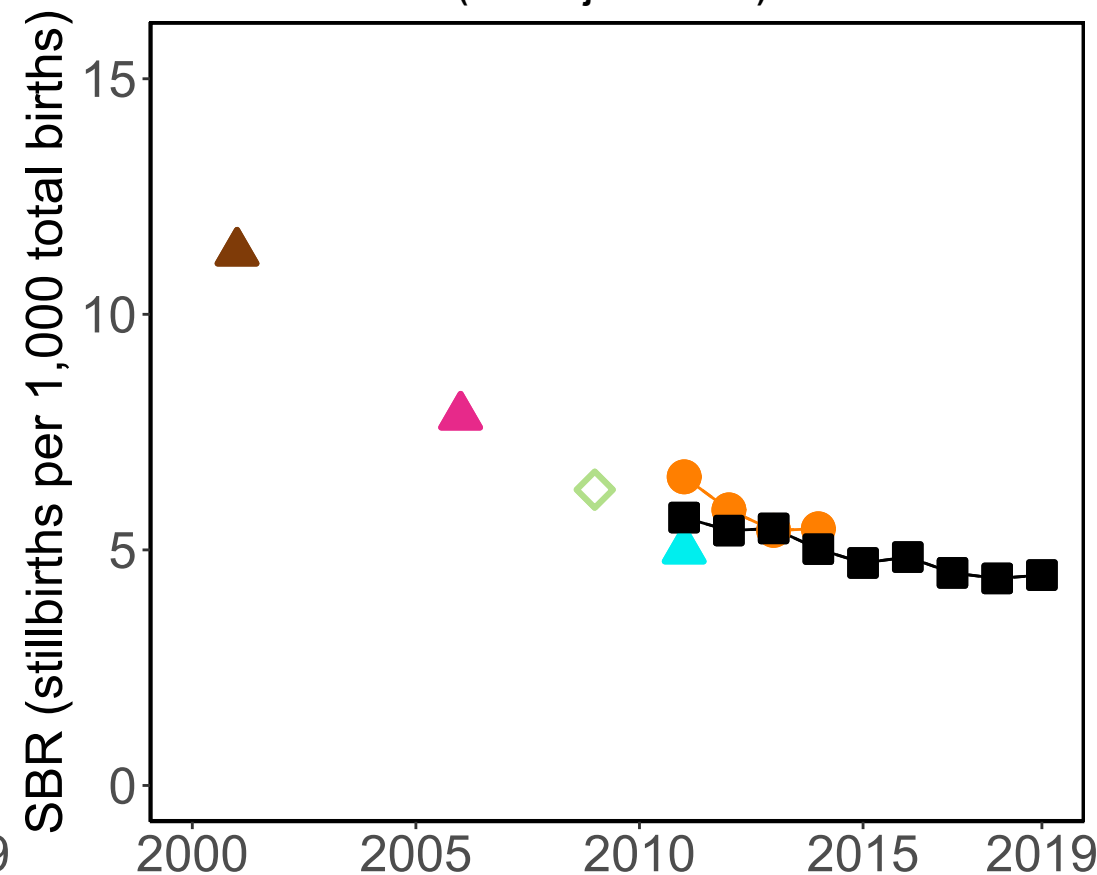

Data Included in the Model

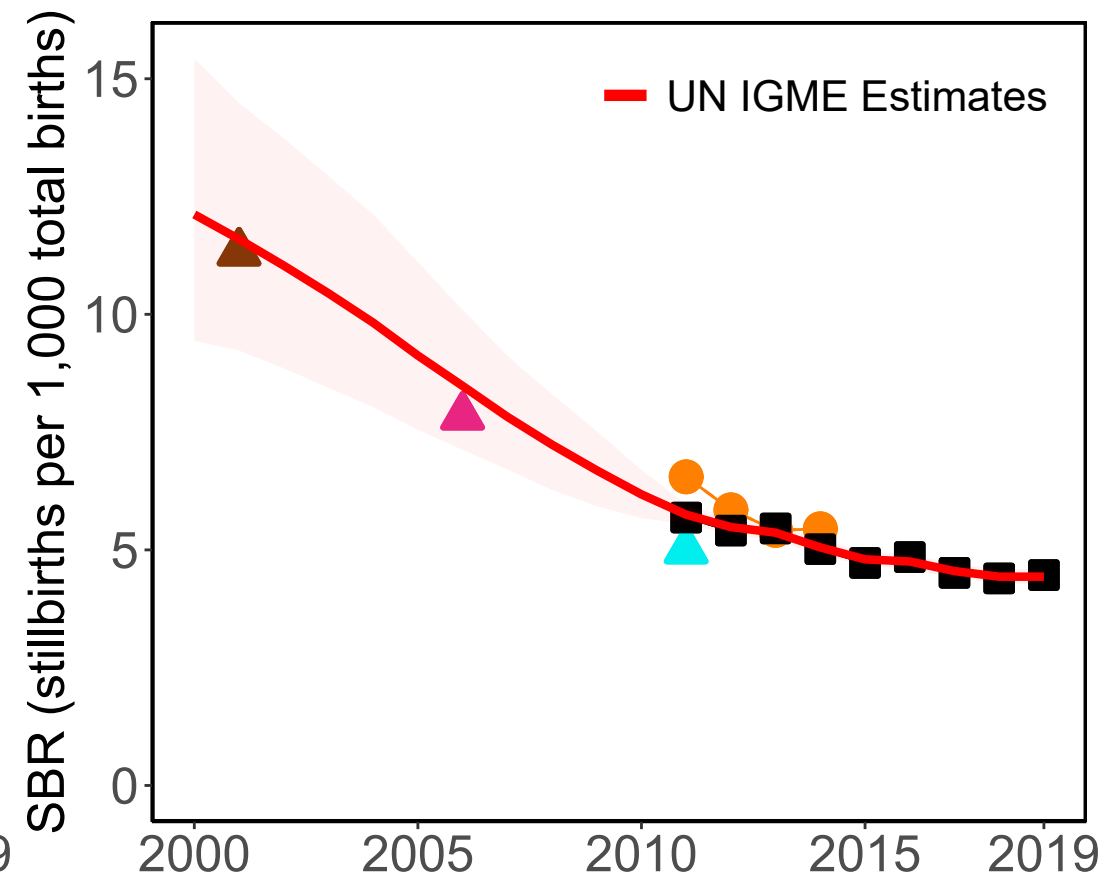

Source Types

- Administrative
- HMIS
- △ Survey
- ◇ Population study

Data Sources

- Vital Registration (28wks)
- HMIS-DHIS2 (1000g)

- HMIS-DHIS2 (28wks adj from 1000g)
- △ Demographic and Health Survey 2013 (DHS) (RC) (28wks)

- △ Demographic and Health Survey 2008 (DHS) (RC) (28wks)
- △ Demographic and Health Survey 2003 (DHS) (RC) (28wks)
- ◇ Arslan 2013 (22wks)
- ◇ Arslan 2013 (28wks adj from 22wks)

# Tuvalu

Available Data

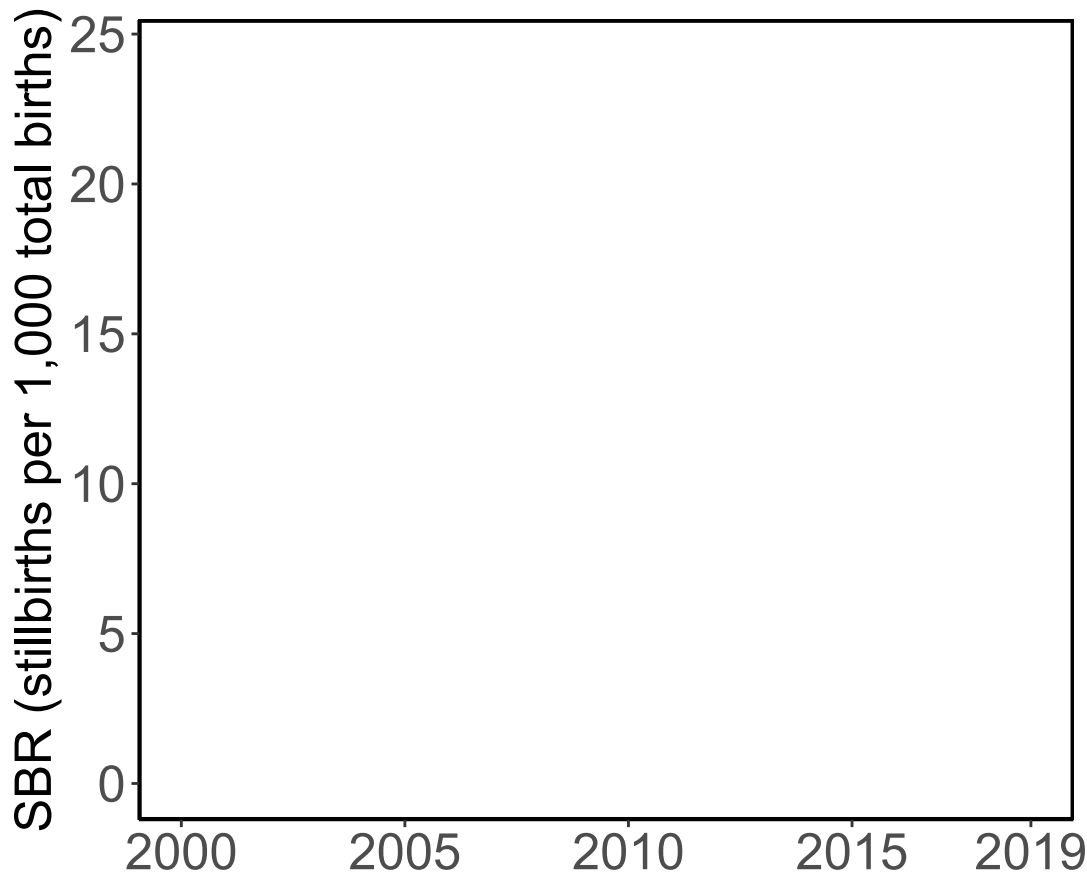

'28+ Weeks of Gestation' Data  
(Incl. Adjusted Data)

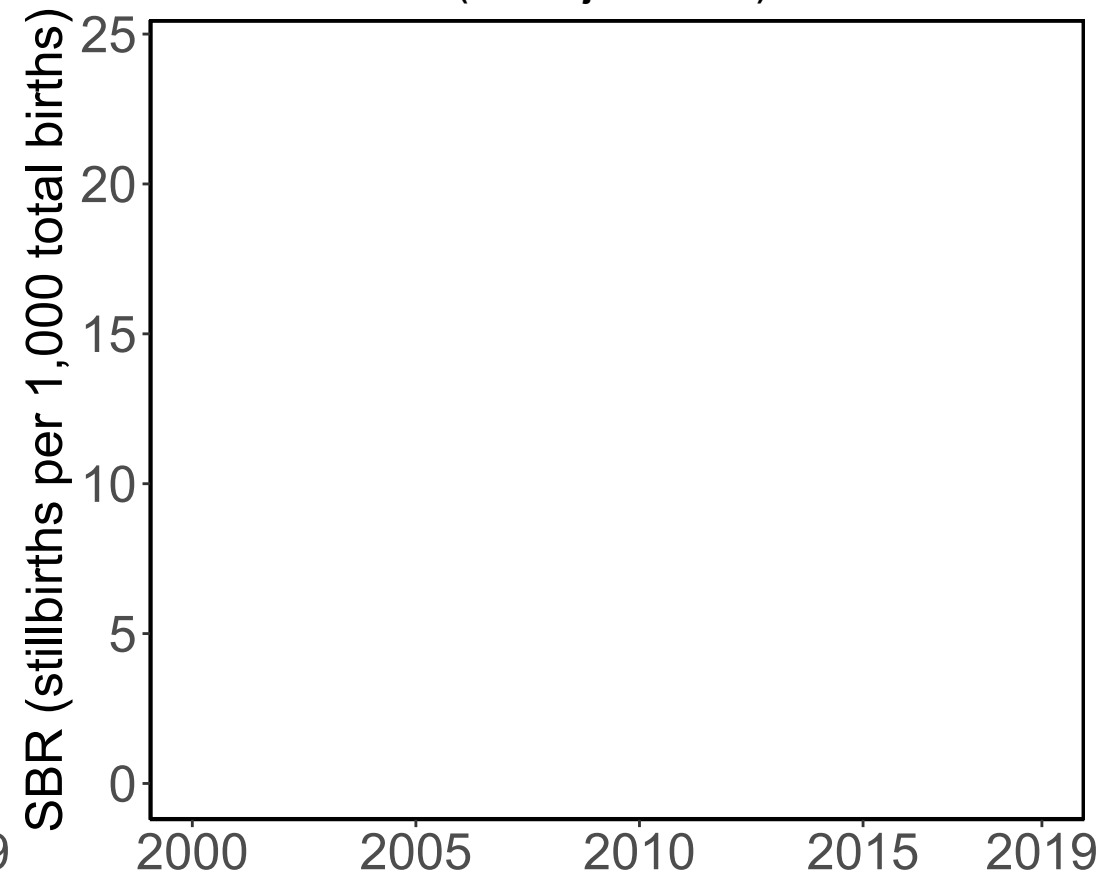

Data Included in the Model

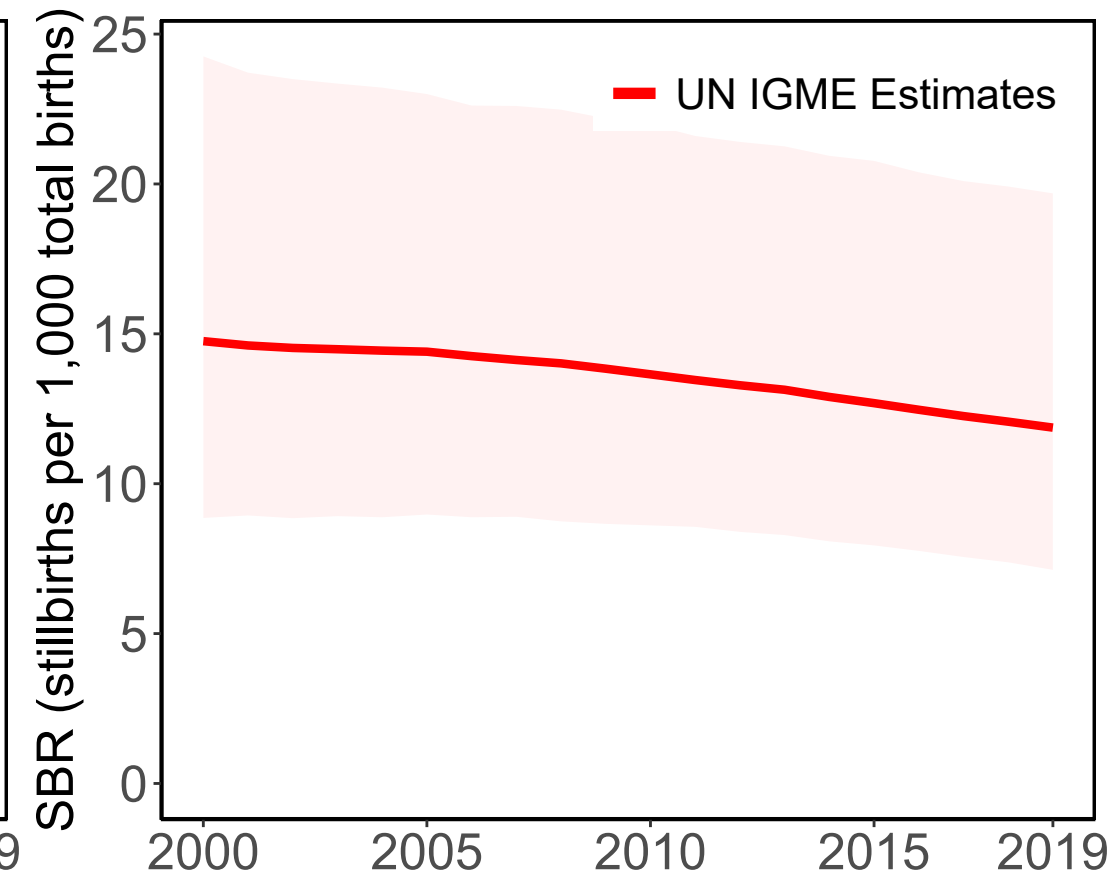

# United Republic of Tanzania

Available Data

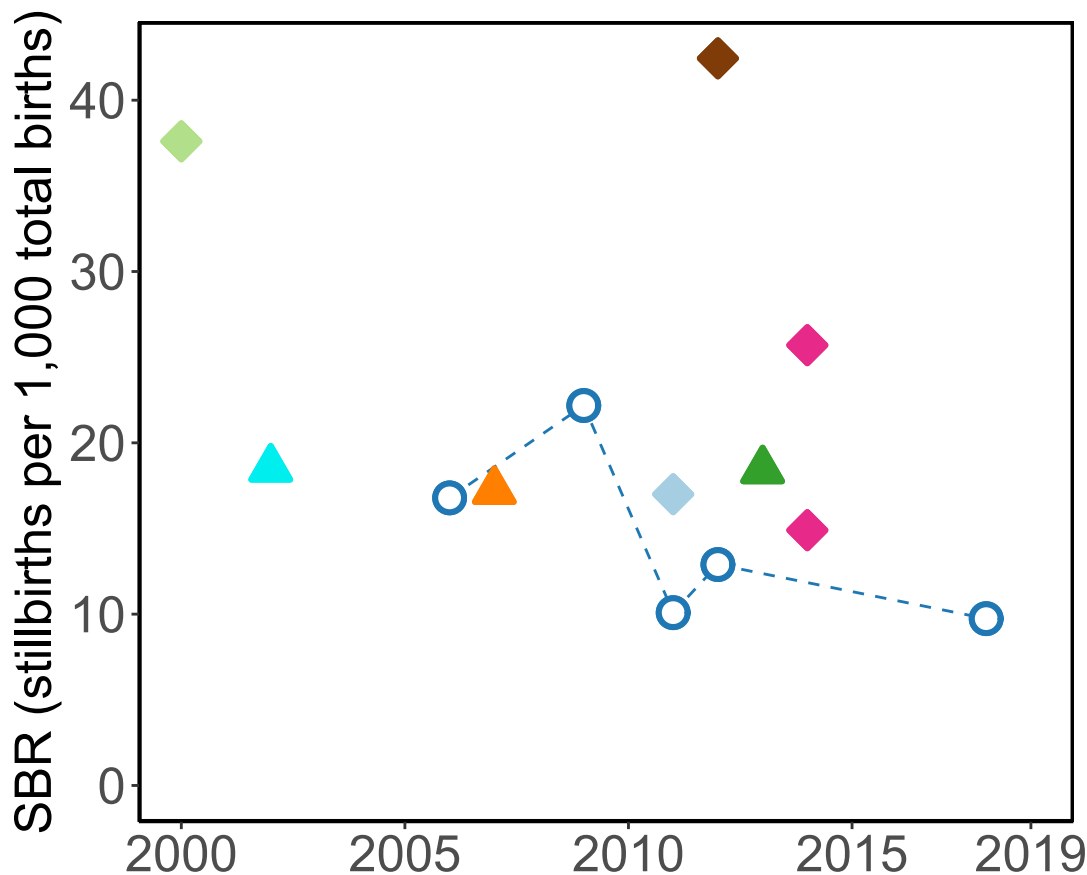

'28+ Weeks of Gestation' Data  
(Incl. Adjusted Data)

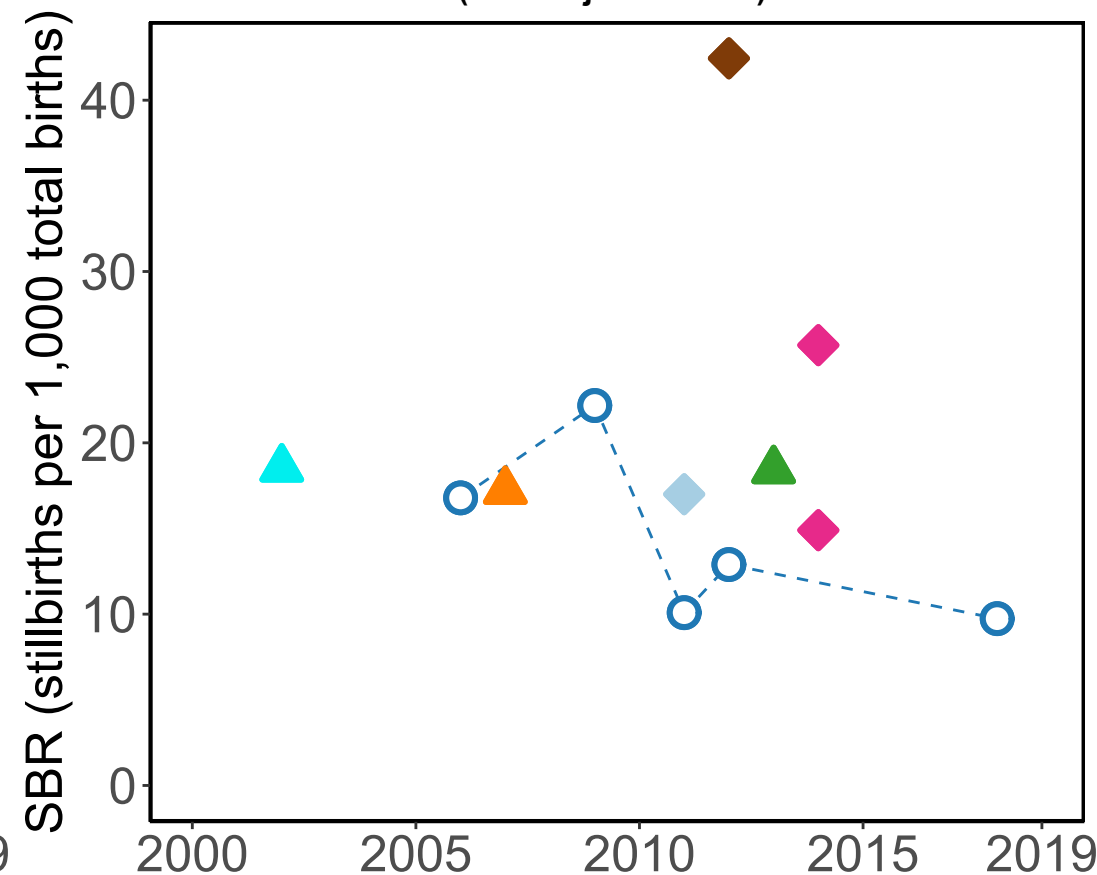

Data Included in the Model

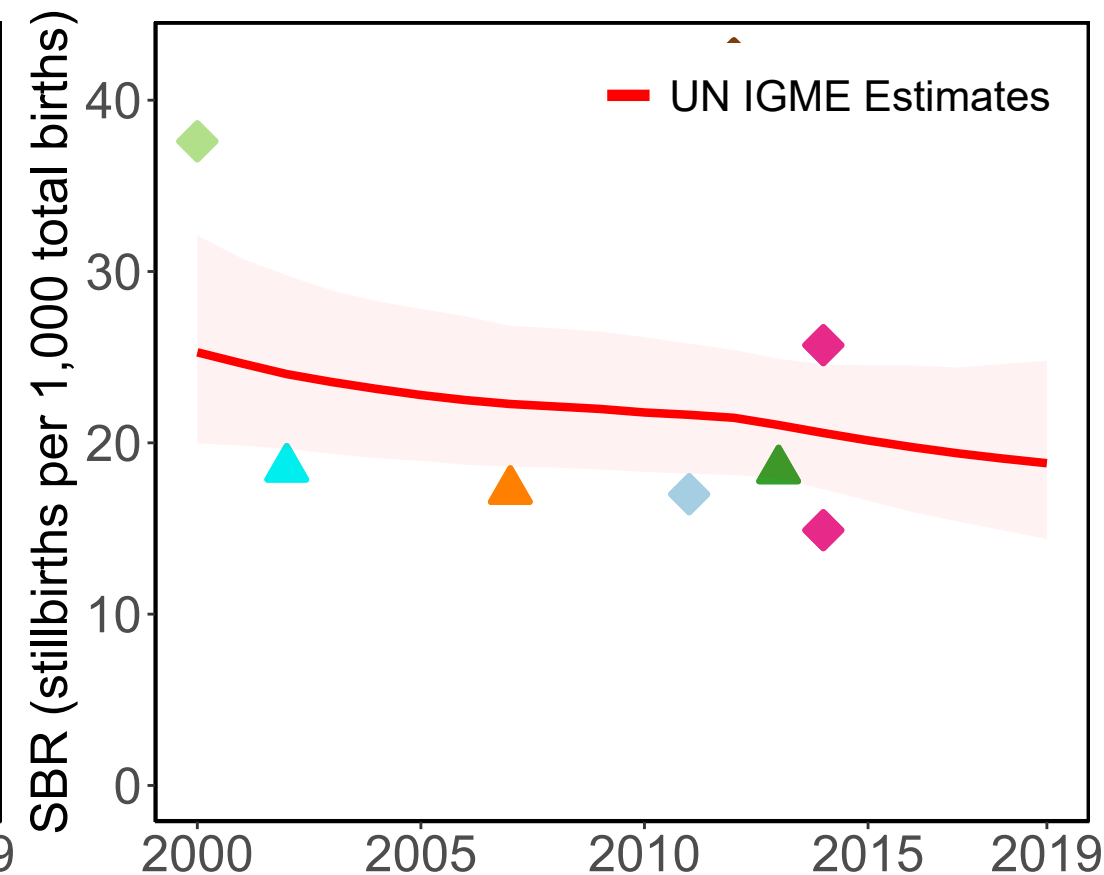

Source Types

- HMIS
- △ Survey
- ◇ Population study

Data Sources

- HMIS-DHIS2 (28wks)
- △ Demographic and Health Survey 2015-16 (DHS) (RC) (28wks)
- △ Demographic and Health Survey 2010 (DHS) (RC) (28wks)
- △ Demographic and Health Survey 2004-05 (DHS) (RC) (28wks)
- ◇ AMANHI 2018 (28wks)
- ◇ Mosha 2014 (28wks)
- ◇ Waiswa (28wks)
- ◇ Kilonzo 2001 (1000g)



# Uganda

Available Data

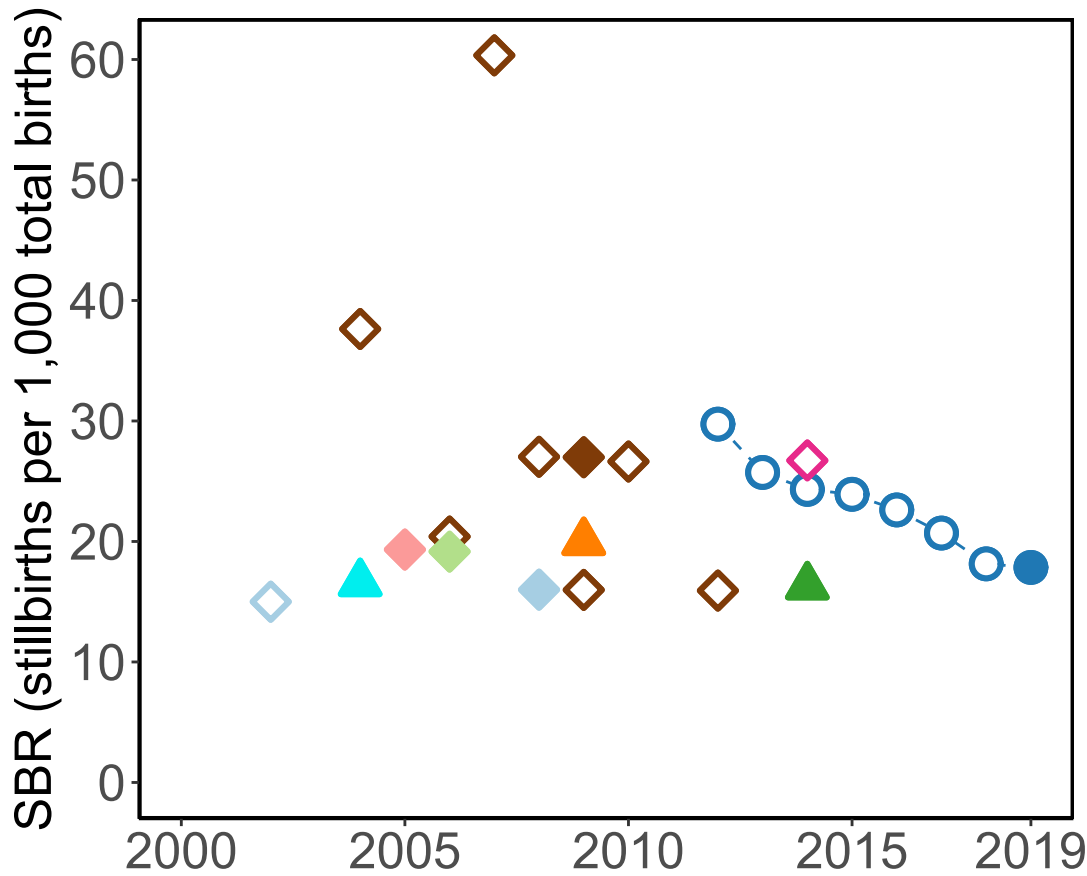

'28+ Weeks of Gestation' Data  
(Incl. Adjusted Data)

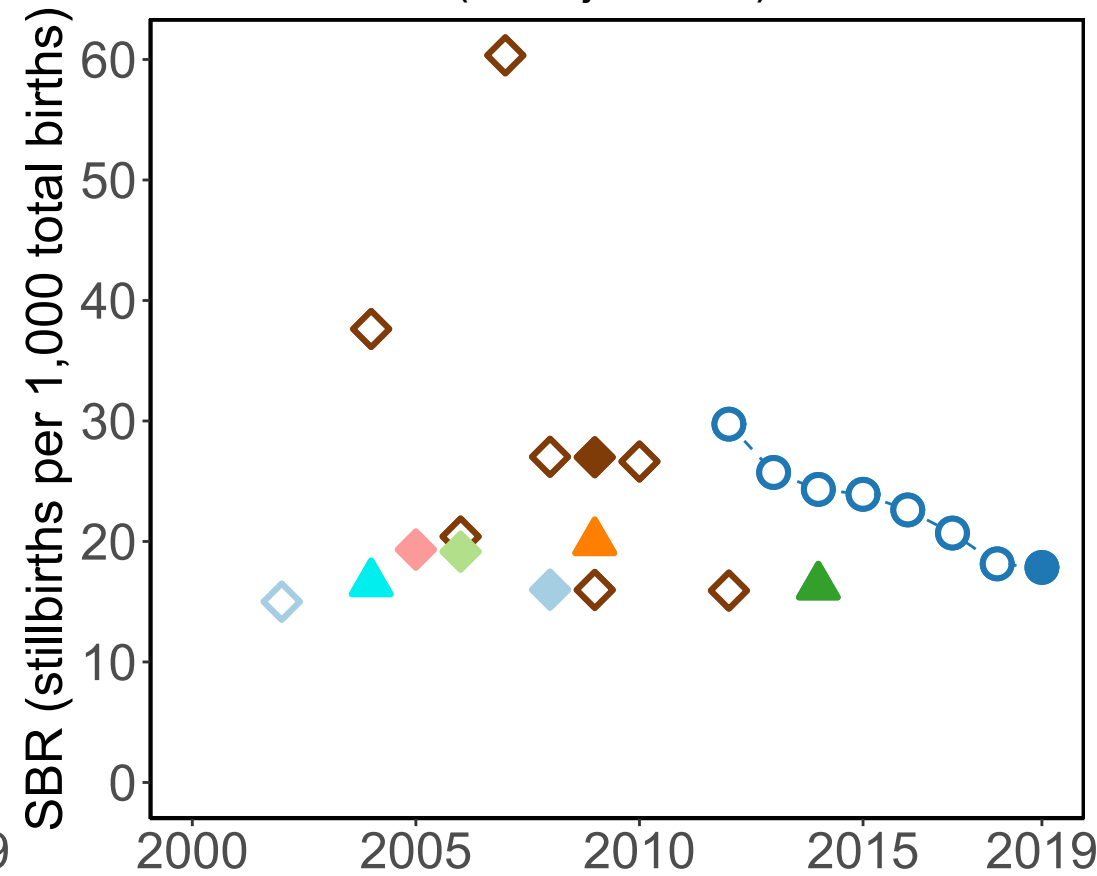

Data Included in the Model

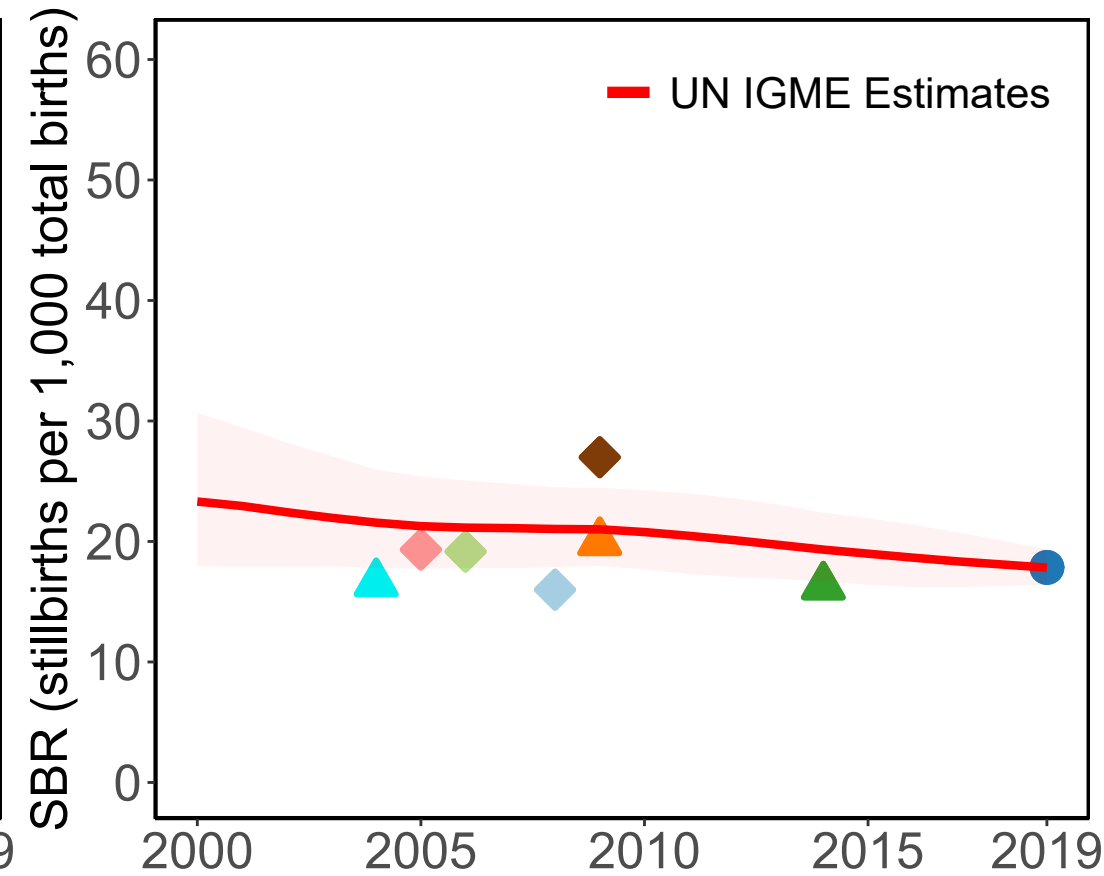

Source Types

- HMIS
- △ Survey
- ◇ Population study

Data Sources

- HMIS-DHIS2 (28wks)
- ▲ Uganda Demographic and Health Survey 2016 (DHS) (RC) (28wks)
- ▲ Demographic and Health Survey 2011 (DHS) (RC) (28wks)
- ▲ Demographic and Health Survey 2006 (DHS) (RC) (28wks)
- ◇ Kananura 2017 (not defined)
- ◆ Asiki 2015 (28wks)
- ◆ Nankabirwa 2011 (28wks)
- ◆ Ndyomugyeni 2011 (28wks)
- ◆ Kujala 2017 (28wks)

# Ukraine

Available Data

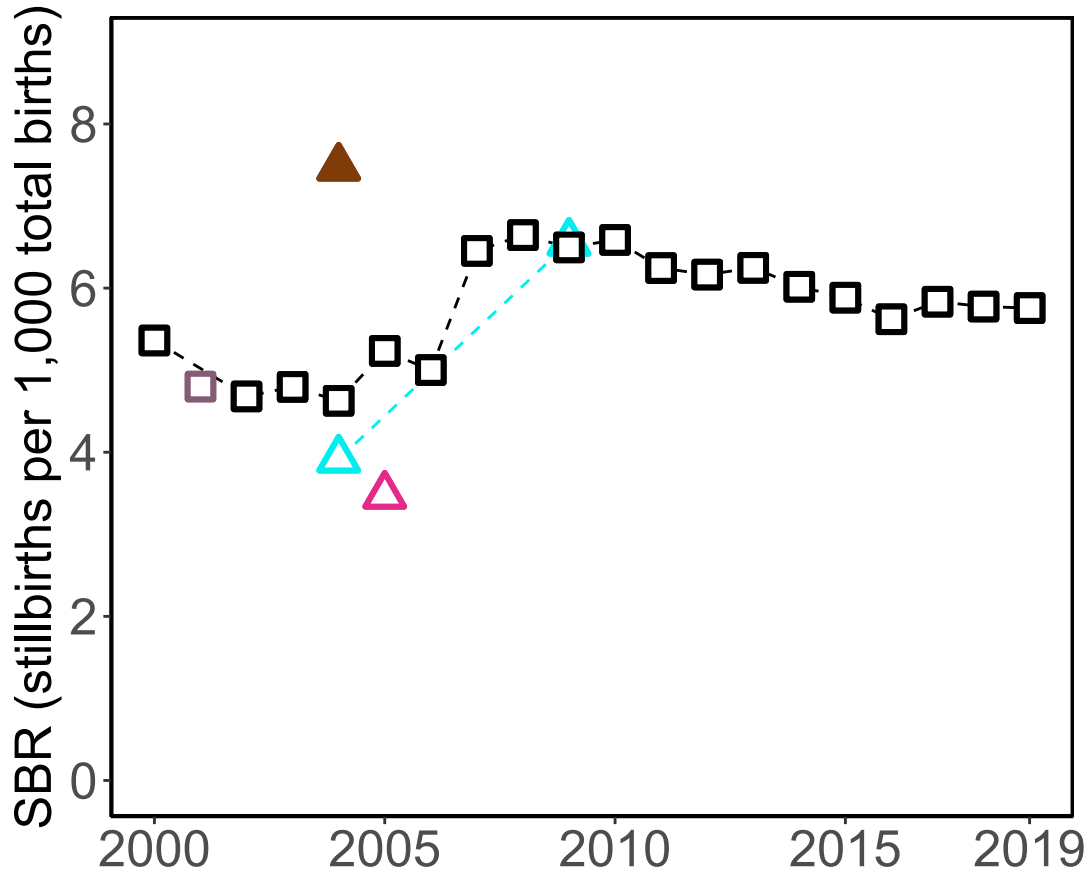

'28+ Weeks of Gestation' Data (Incl. Adjusted Data)

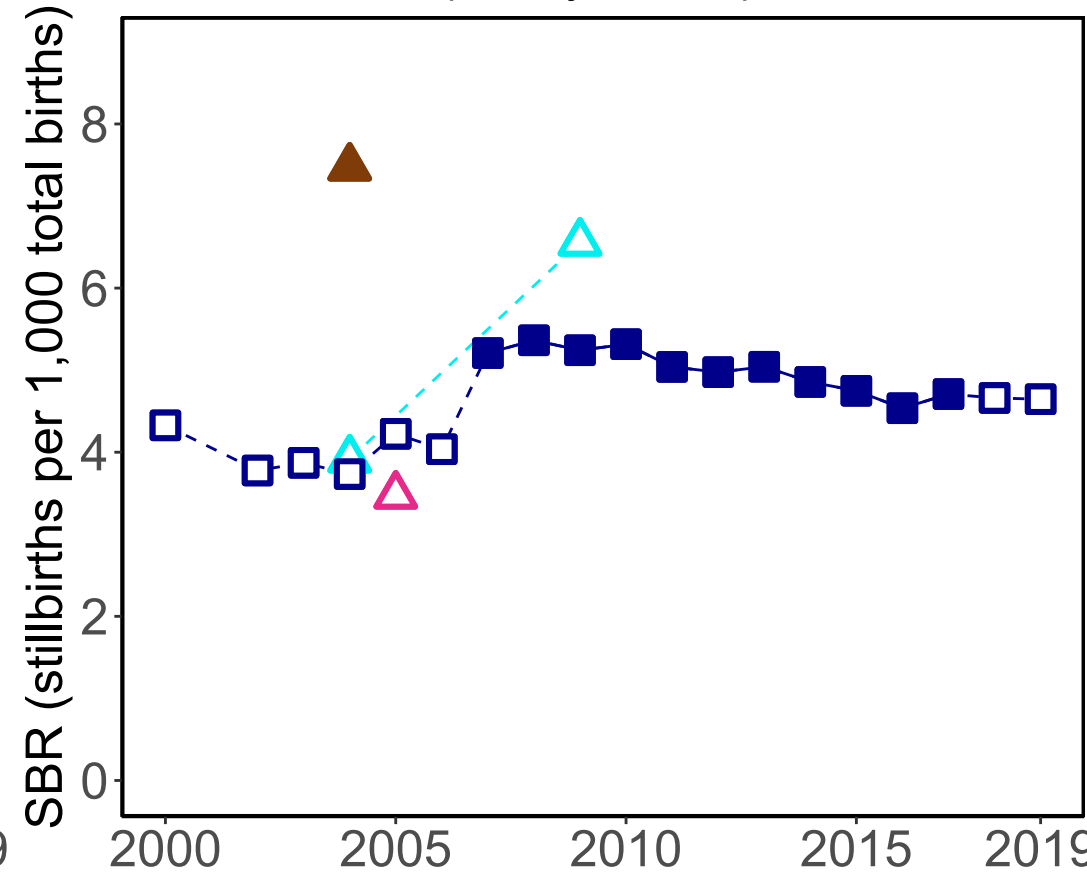

Data Included in the Model

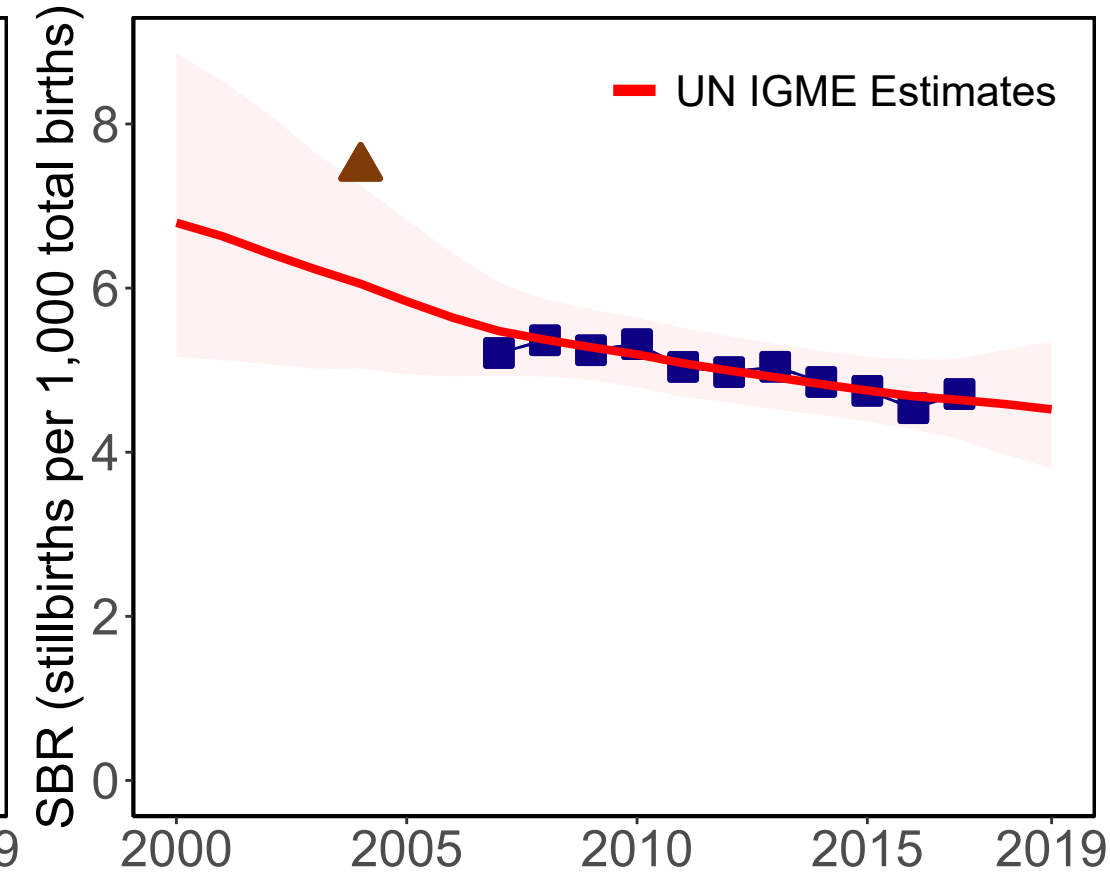

Source Types

□ Administrative    △ Survey

Data Sources

■ Vital Registration (28wks adj from 22wks)    
 □ Vital Registration (1000g)    
 △ Demographic and Health Survey 2007 (DHS) (RC) (28wks)

□ Vital Registration (22wks)    
 △ Multiple Indicator Cluster Survey 2012 (MICS) (PH) (28wks)    
 ▲ Demographic and Health Survey 2007 (DHS) (PH) (28wks)

# Uruguay

### Available Data

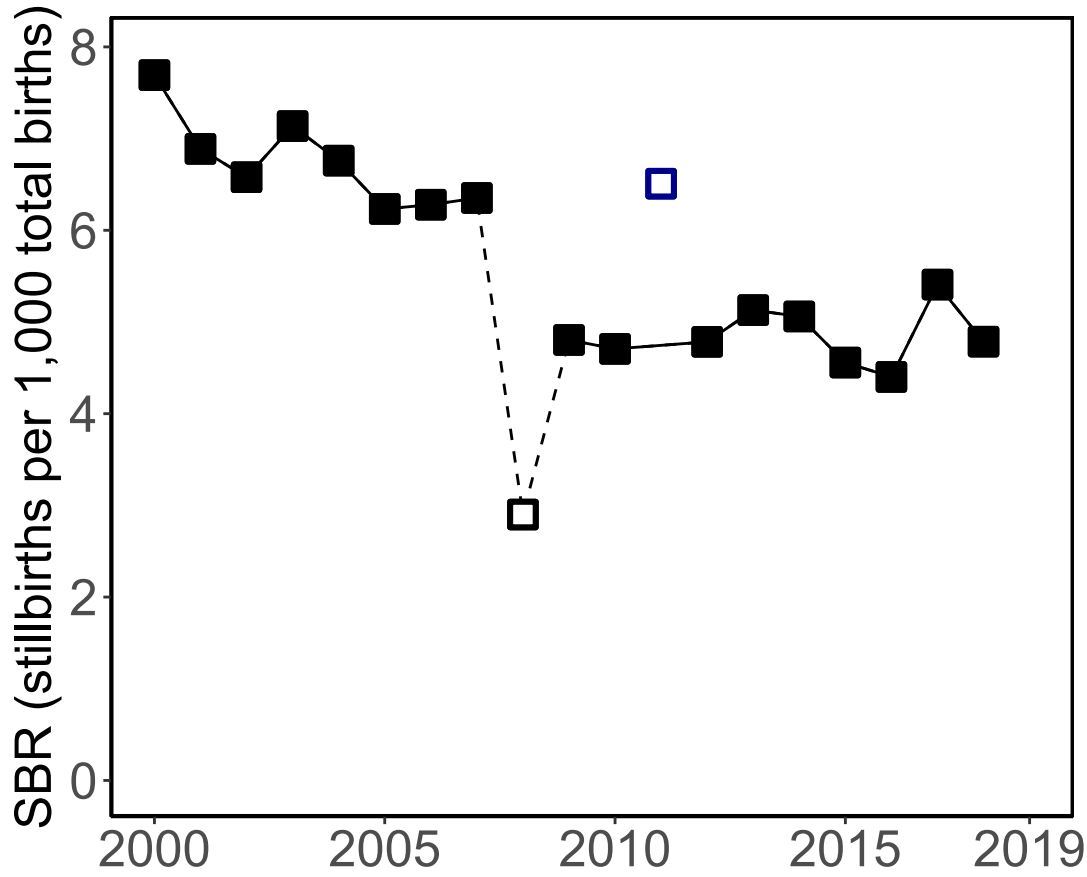

### '28+ Weeks of Gestation' Data (Incl. Adjusted Data)

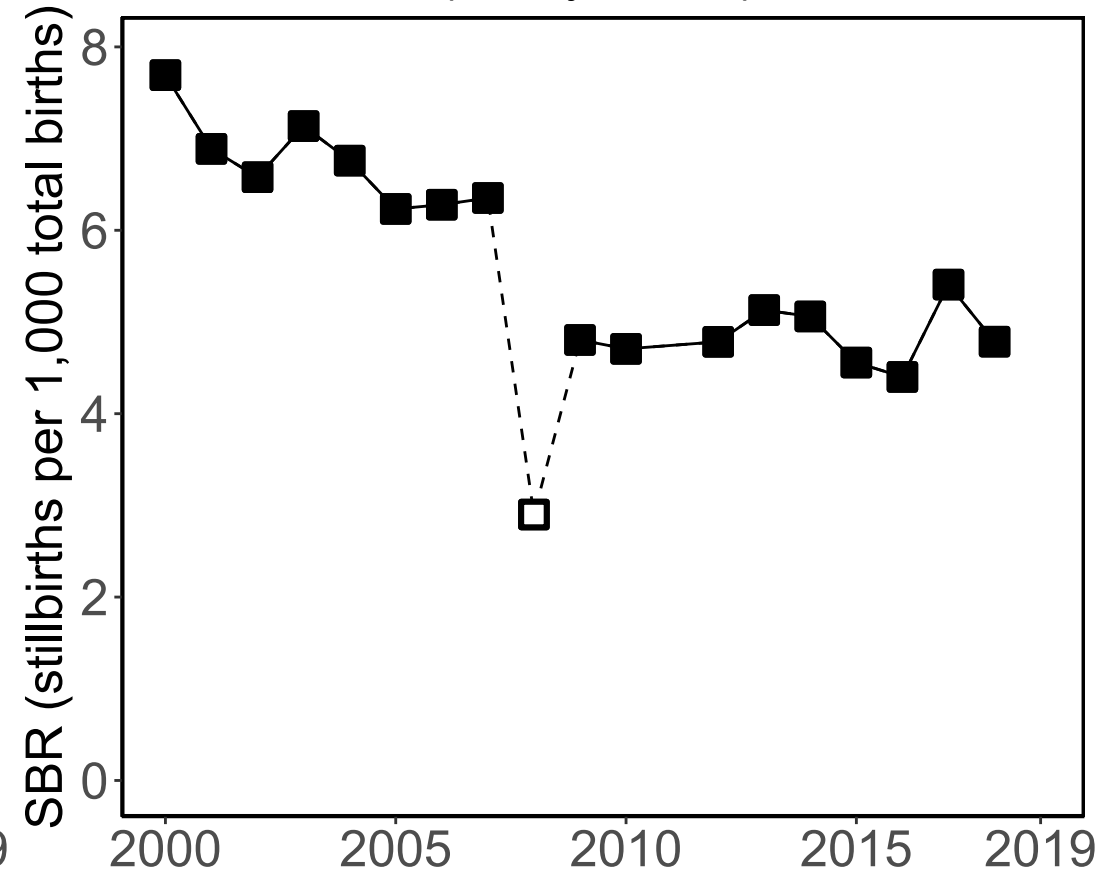

### Data Included in the Model

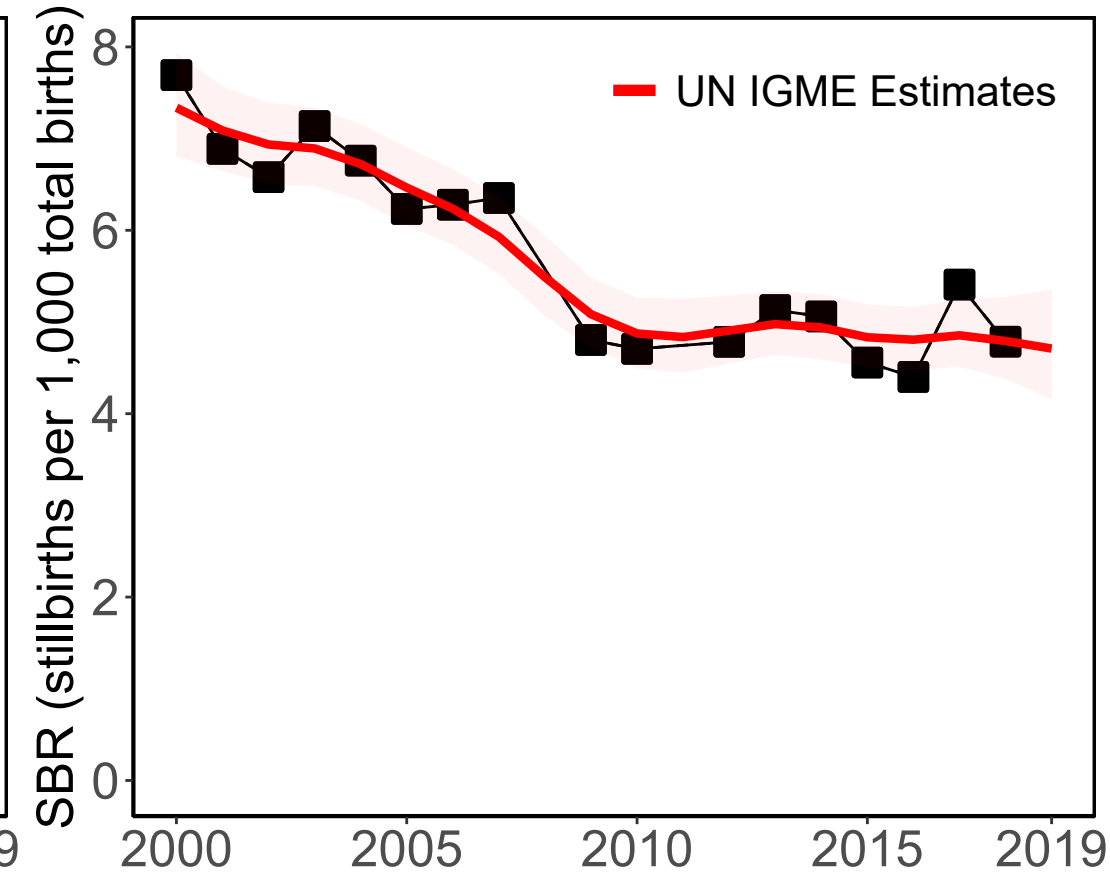

#### Source Types

□ Administrative

#### Data Sources

□ Vital Registration (not defined)

■ Vital Registration (28wks)

# United States of America

### Available Data

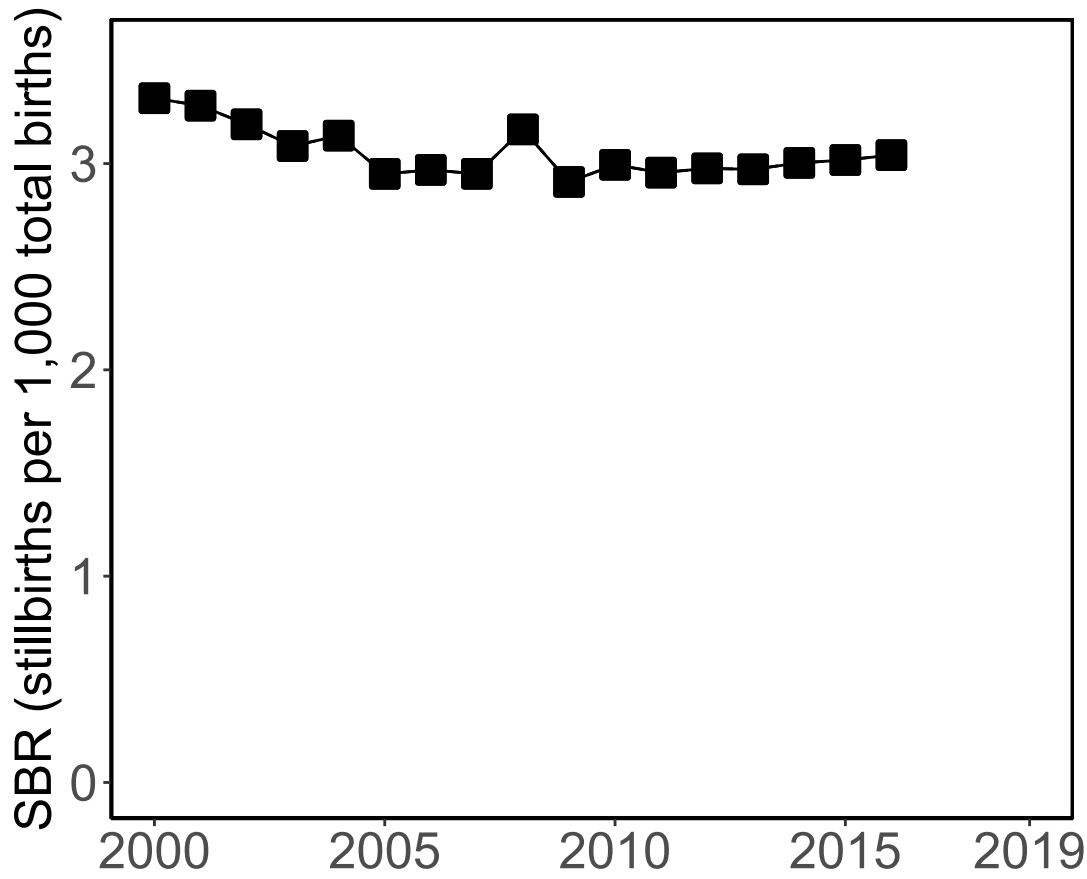

### '28+ Weeks of Gestation' Data (Incl. Adjusted Data)

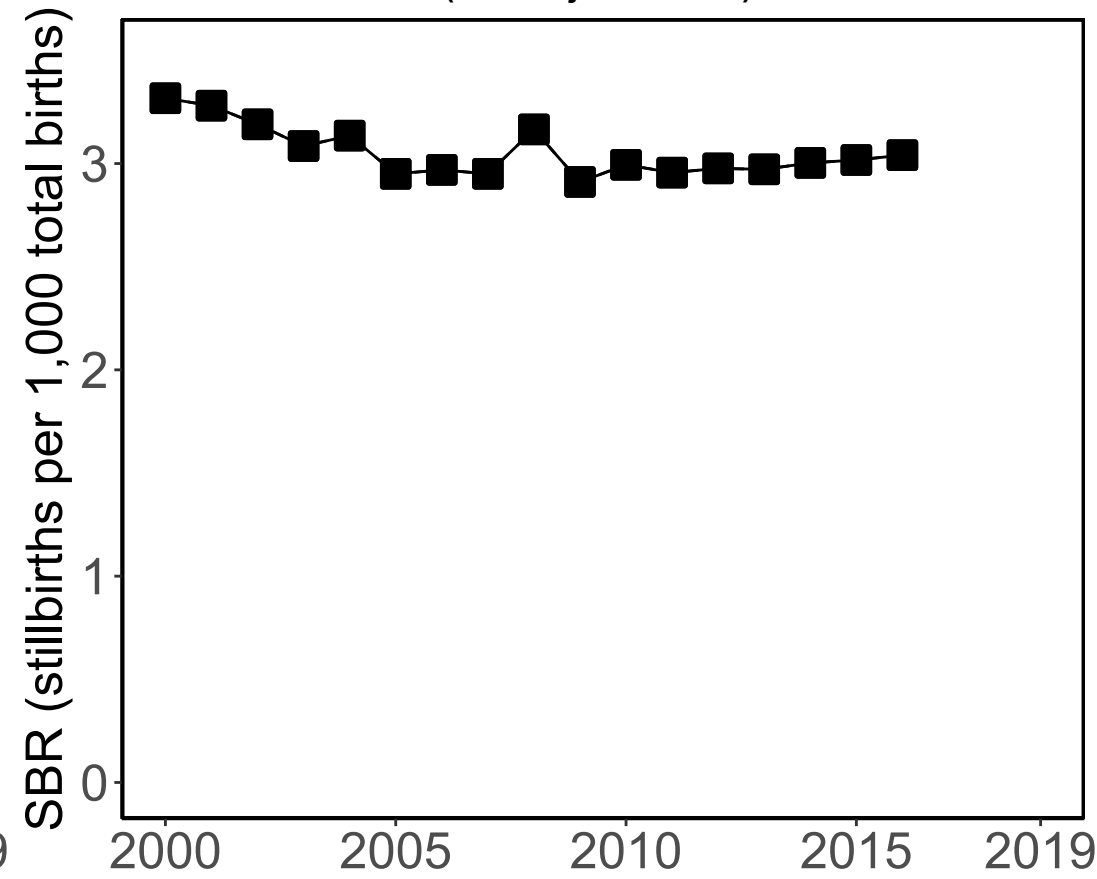

### Data Included in the Model

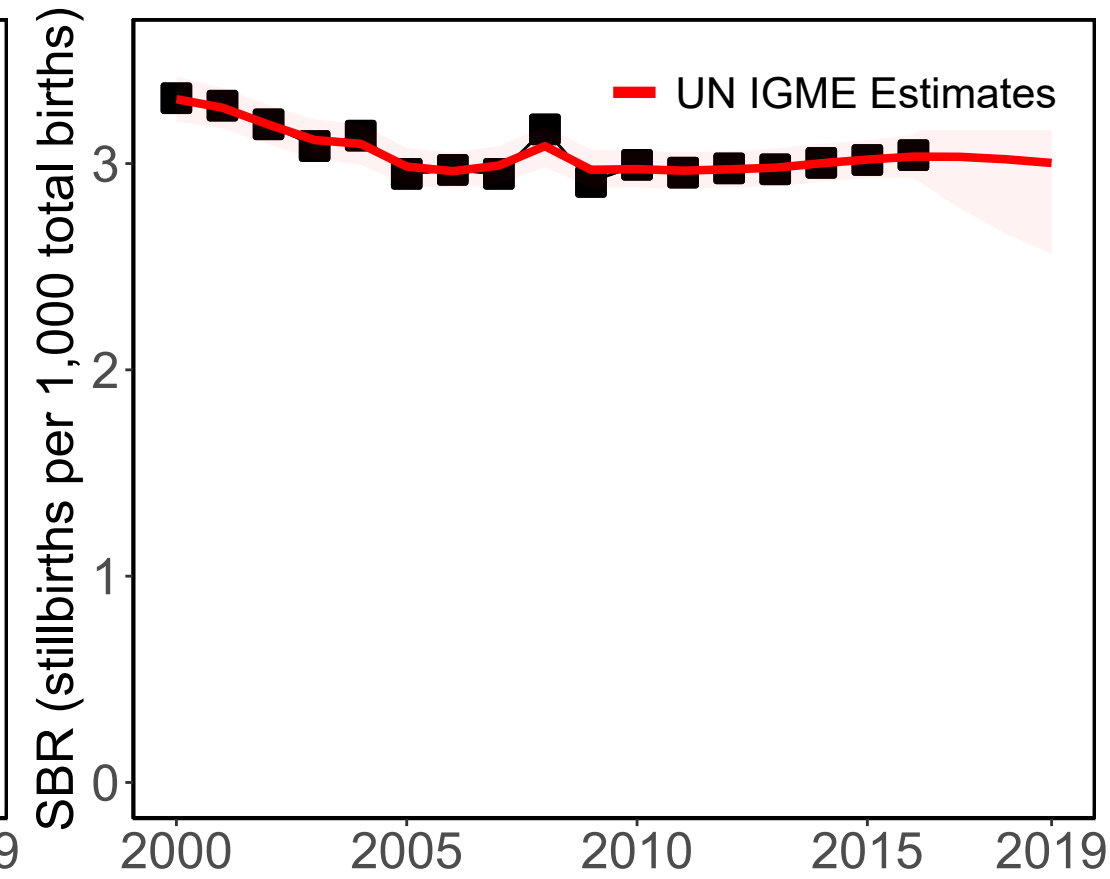

#### Source Types

□ Administrative

#### Data Sources

■ Vital Registration (28wks)

# Uzbekistan

### Available Data

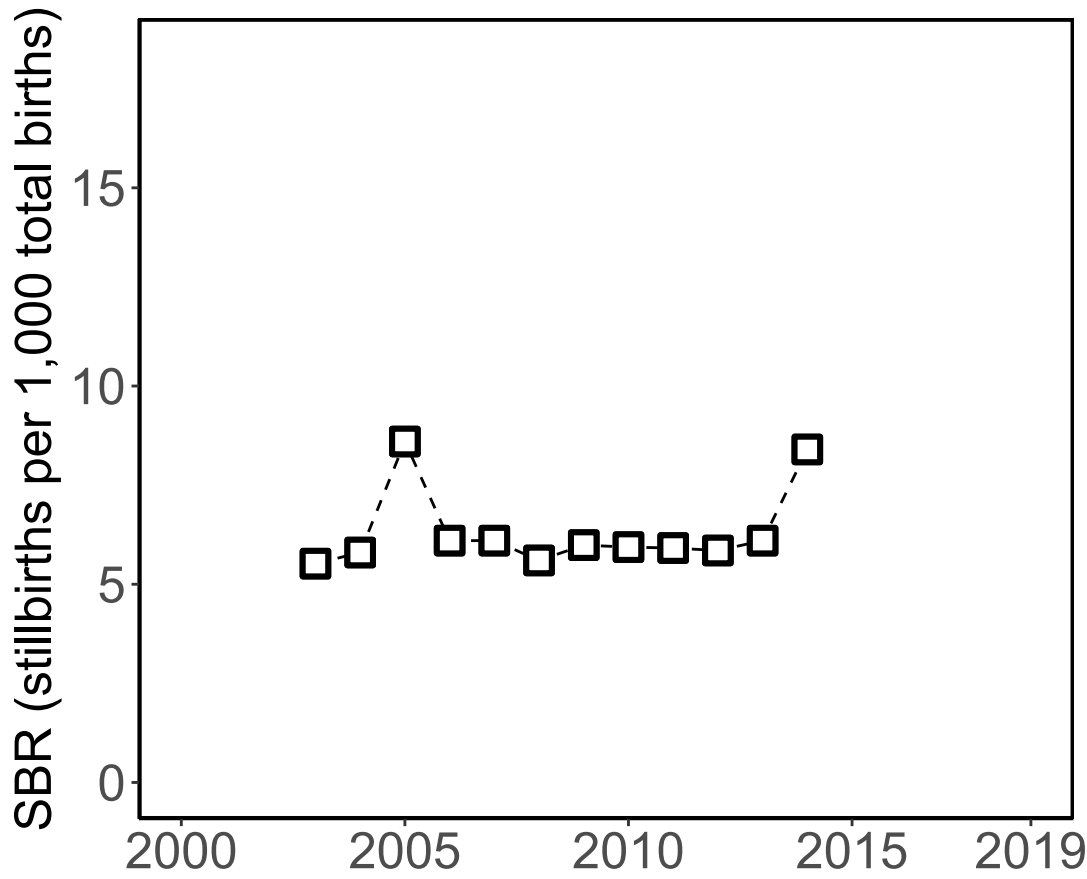

### '28+ Weeks of Gestation' Data (Incl. Adjusted Data)

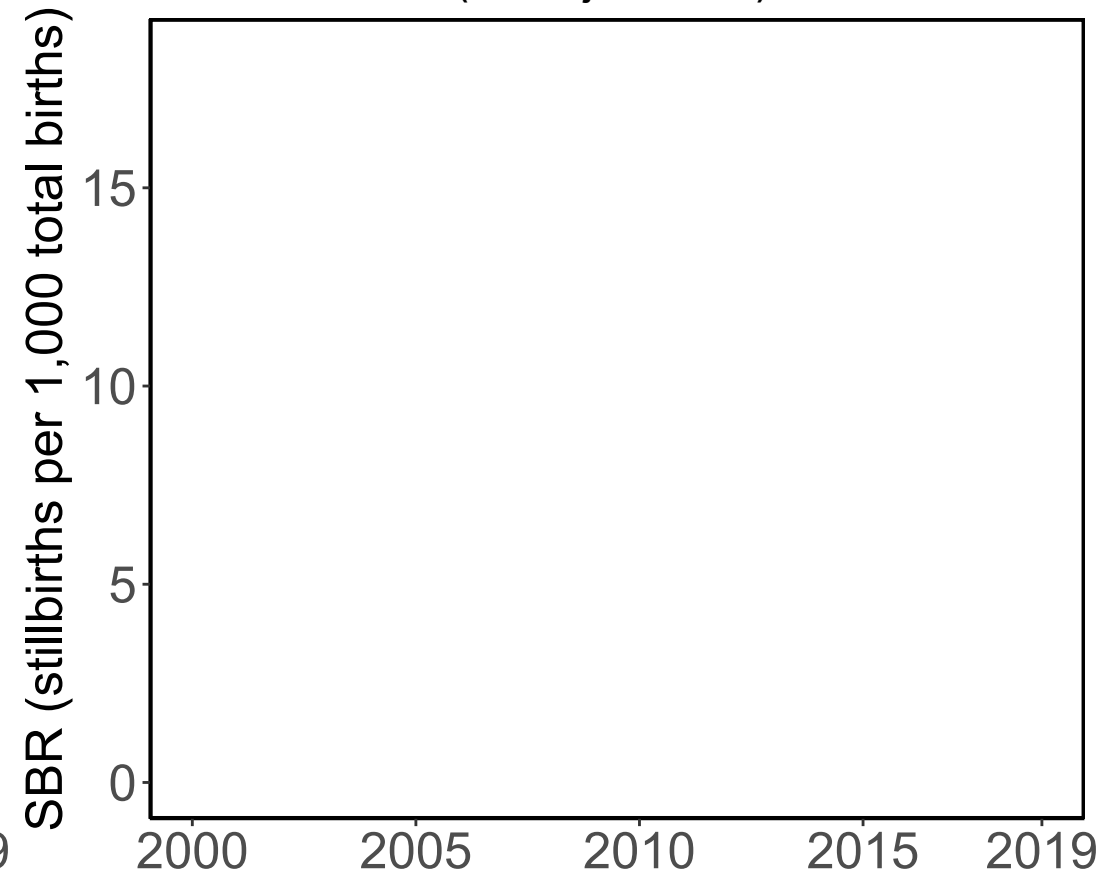

### Data Included in the Model

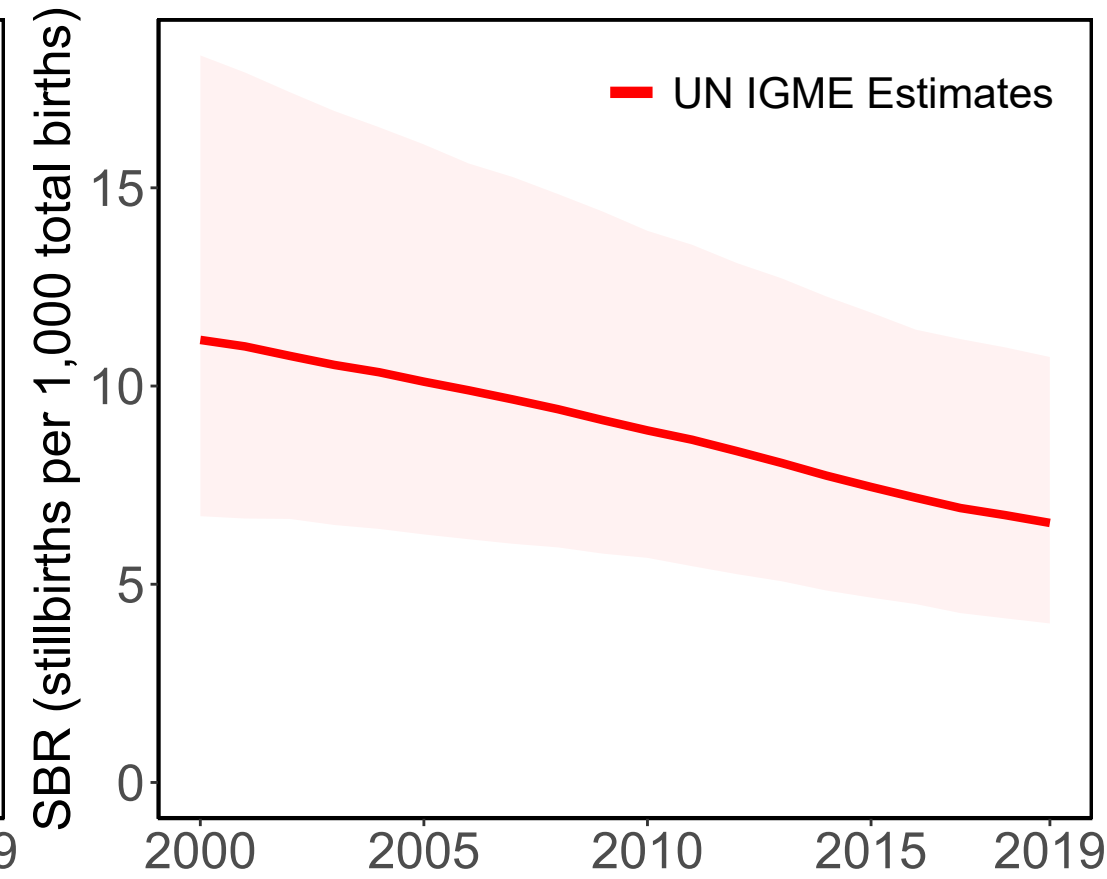

#### Source Types

□ Administrative

#### Data Sources

□ Vital Registration (not defined)

# Saint Vincent and the Grenadines

## Available Data

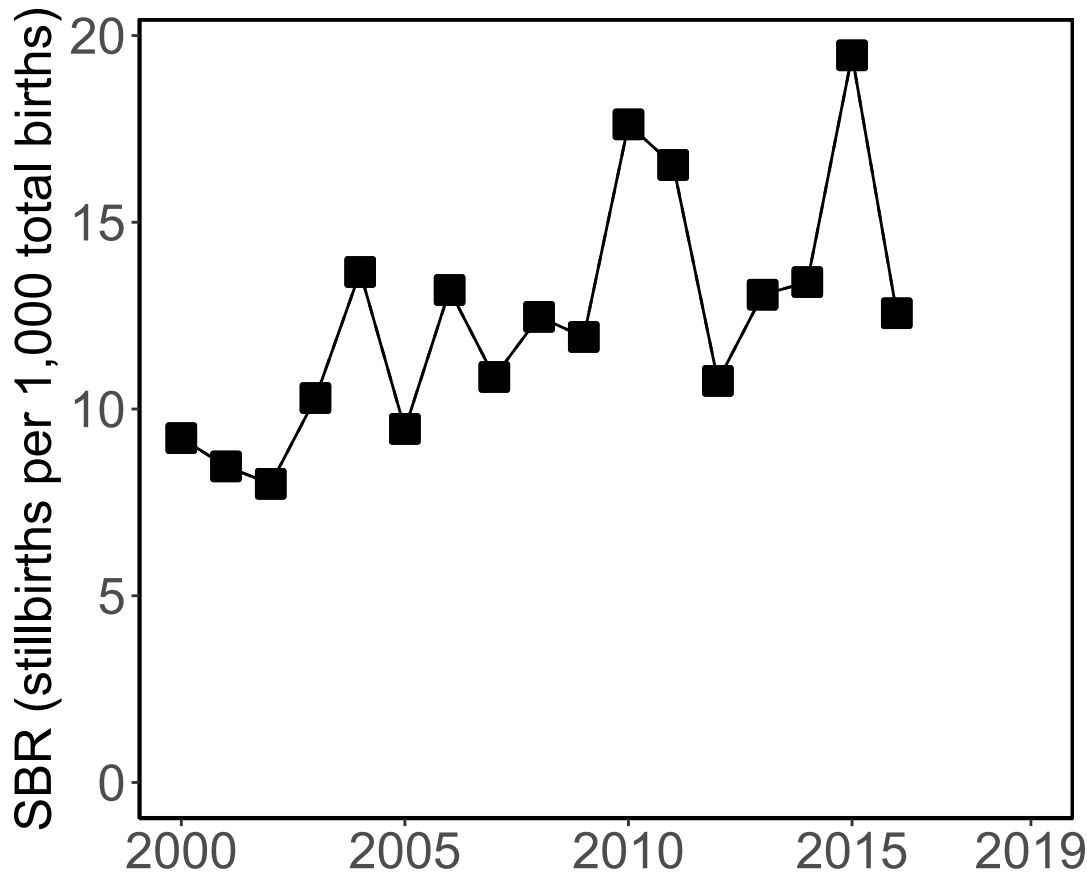

## '28+ Weeks of Gestation' Data (Incl. Adjusted Data)

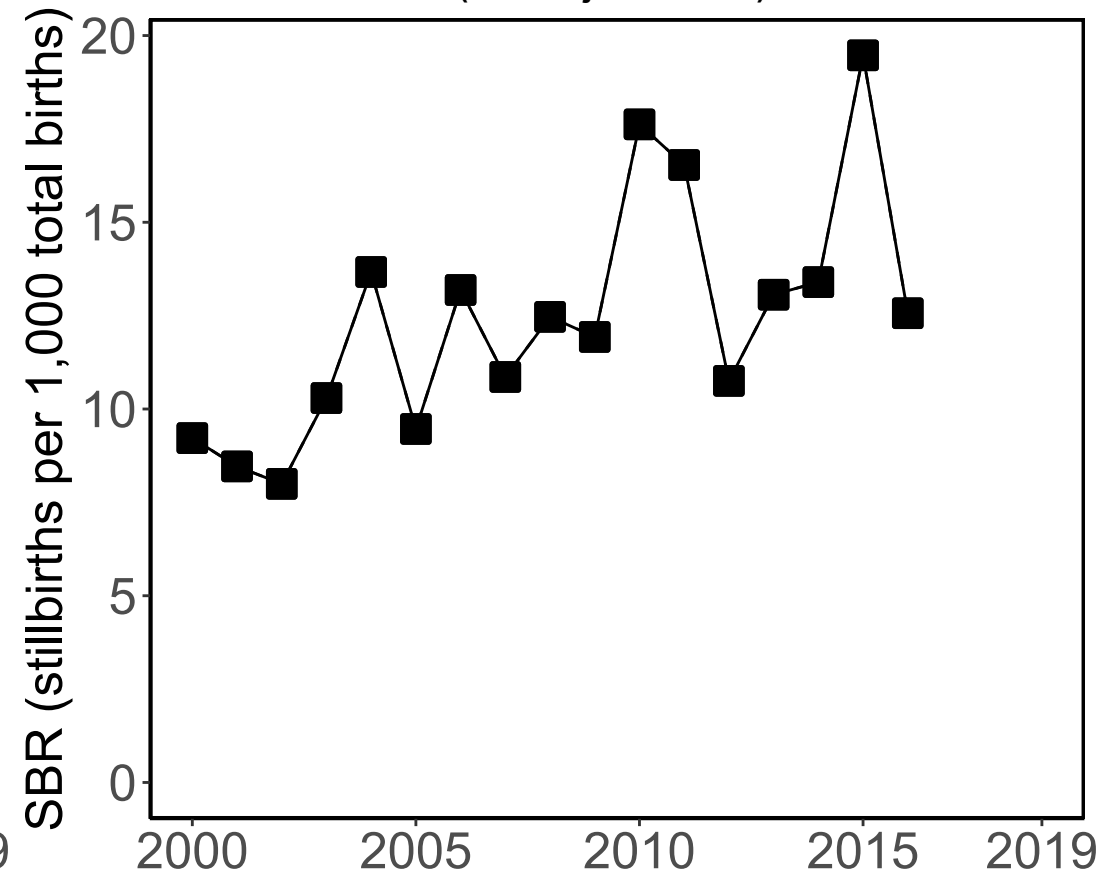

## Data Included in the Model

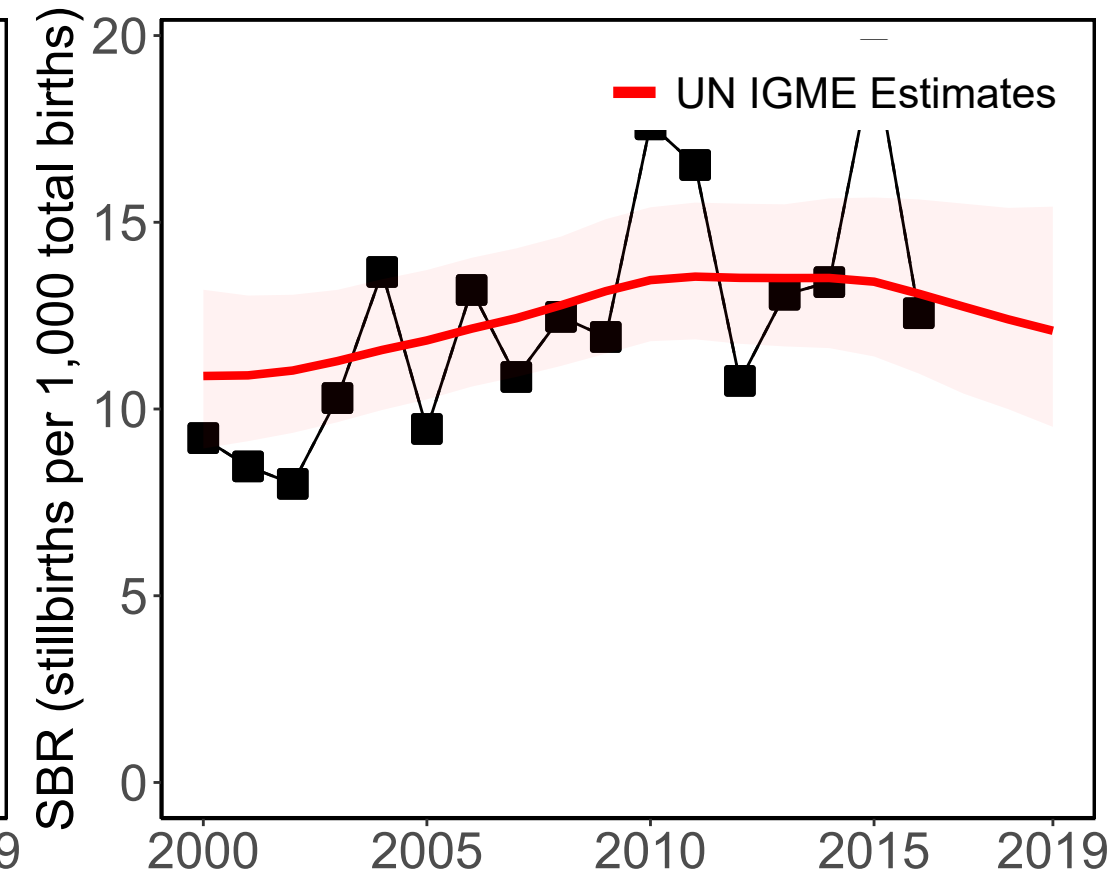

### Source Types

□ Administrative

### Data Sources

■ Vital Registration (28wks)

# Venezuela (Bolivarian Republic of)

## Available Data

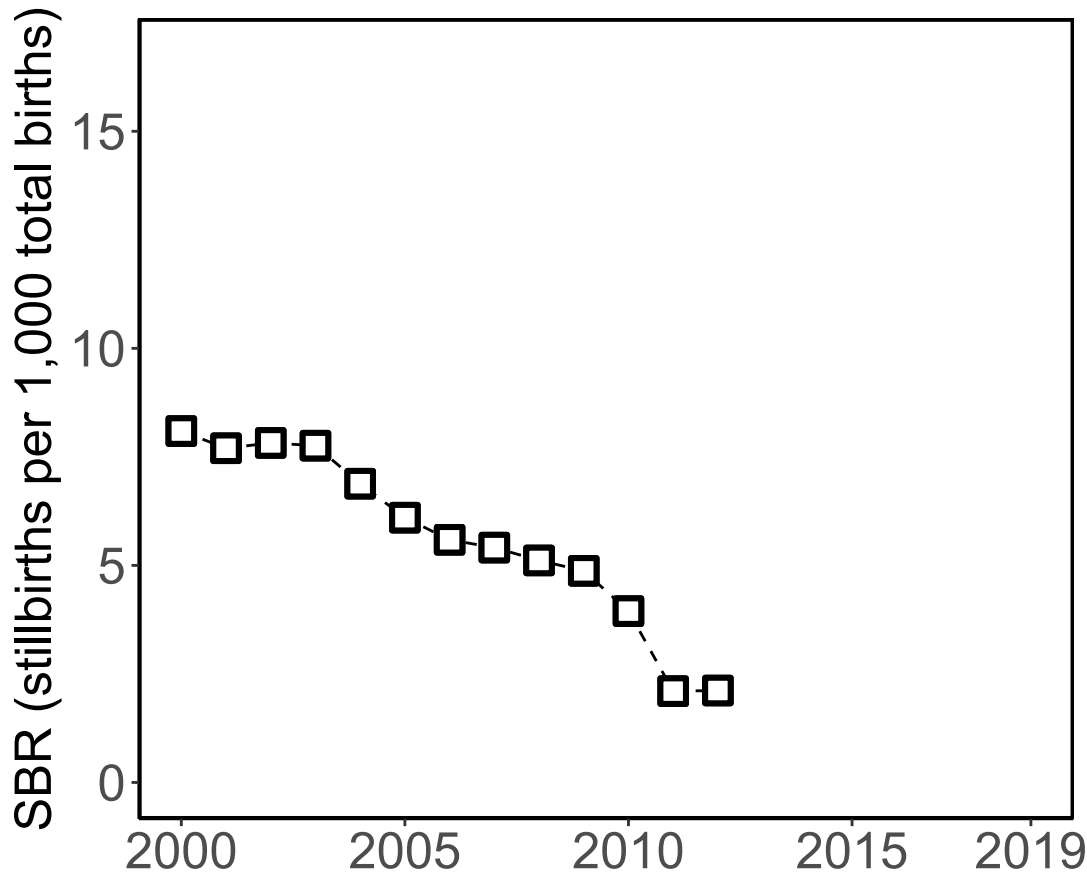

## '28+ Weeks of Gestation' Data (Incl. Adjusted Data)

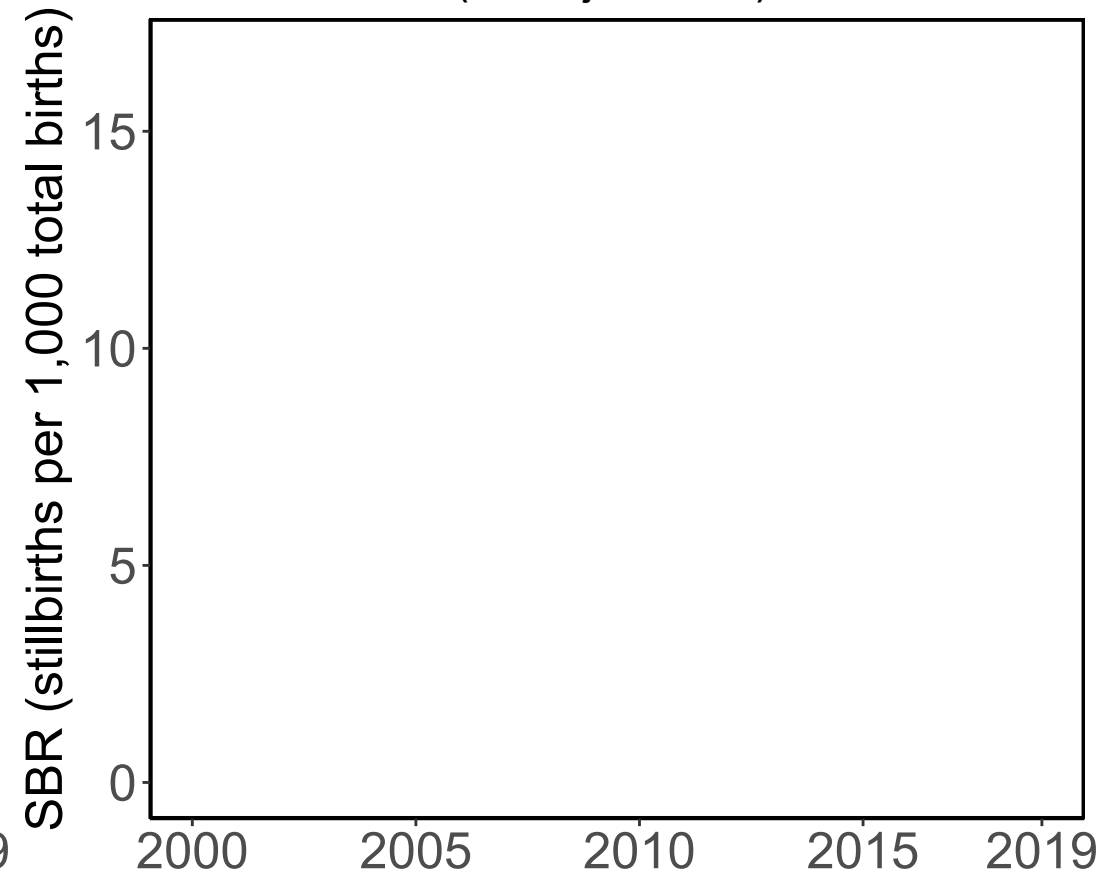

## Data Included in the Model

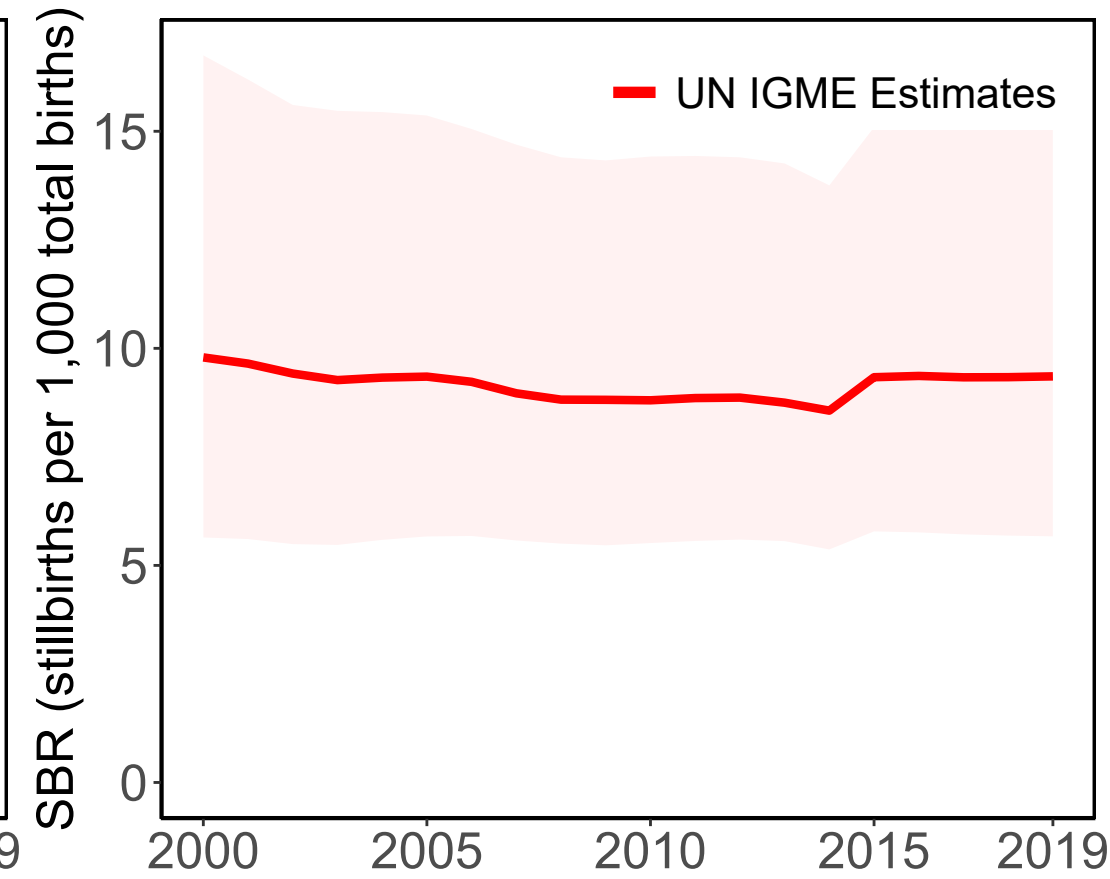

### Source Types

Administrative

### Data Sources

Vital Registration (not defined)

# Vietnam

### Available Data

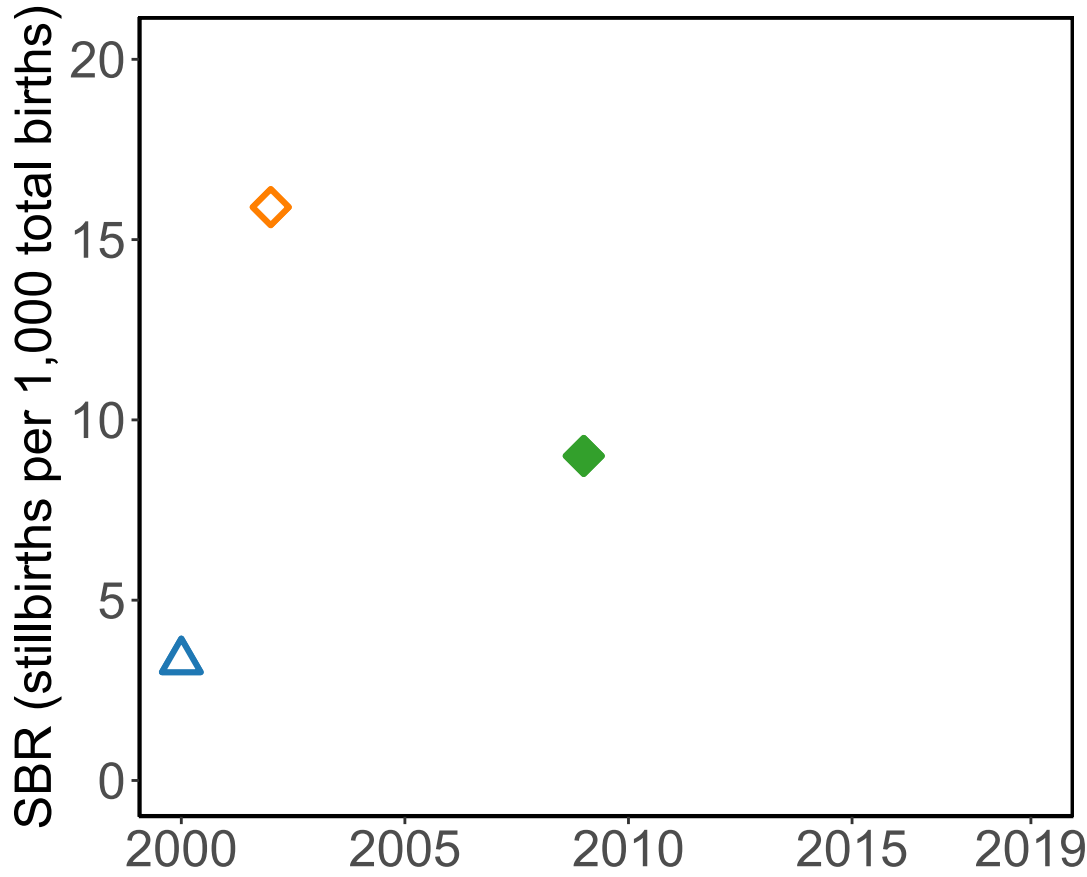

### '28+ Weeks of Gestation' Data (Incl. Adjusted Data)

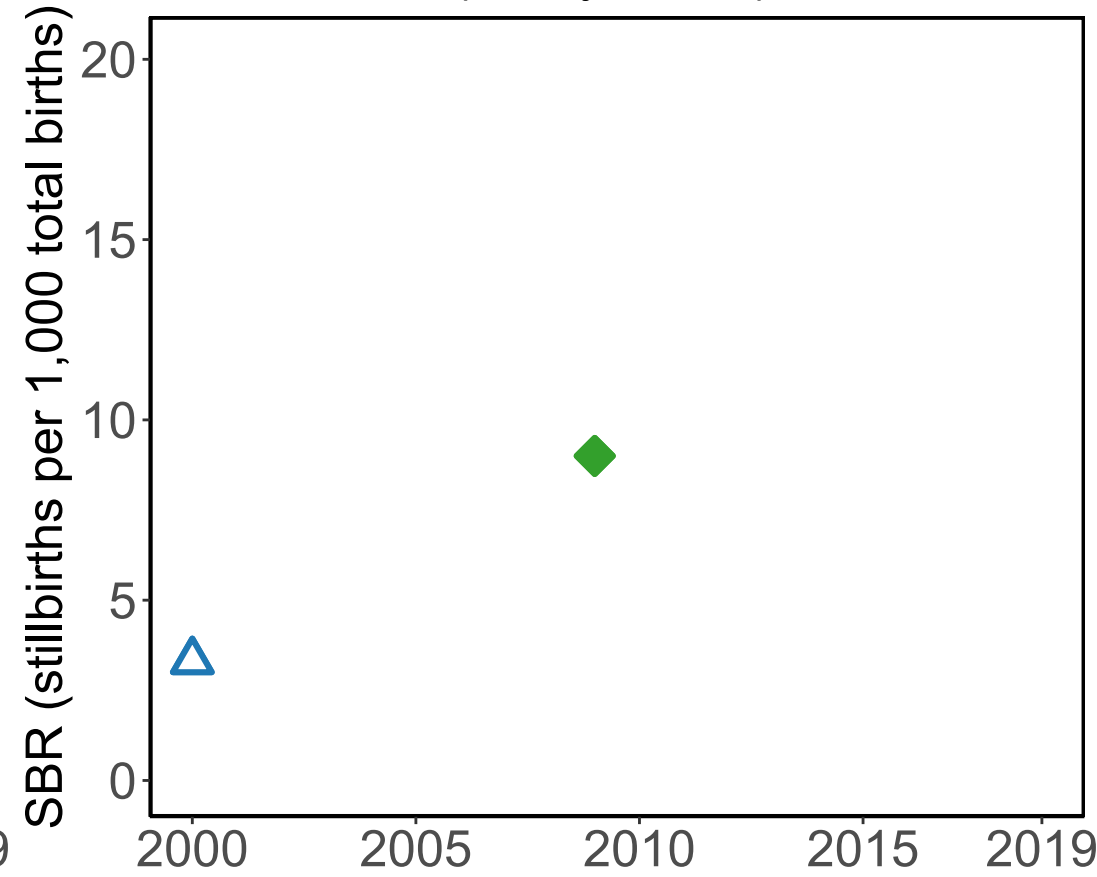

### Data Included in the Model

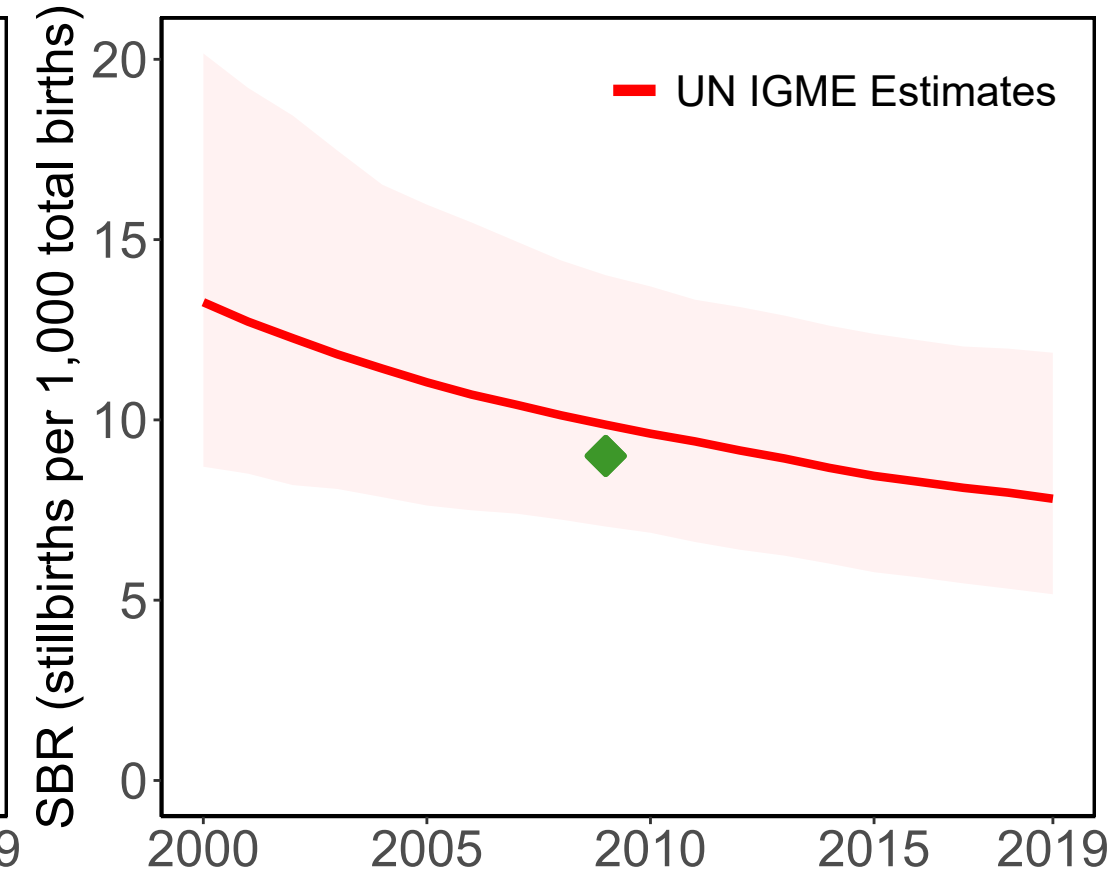

#### Source Types

△ Survey ◇ Population study

#### Data Sources

△ Demographic and Health Survey 2002 (DHS) (RC) (28wks) ◇ Persson 2013 (28wks)

◇ Graner 2009 (24wks)



# Vanuatu

Available Data

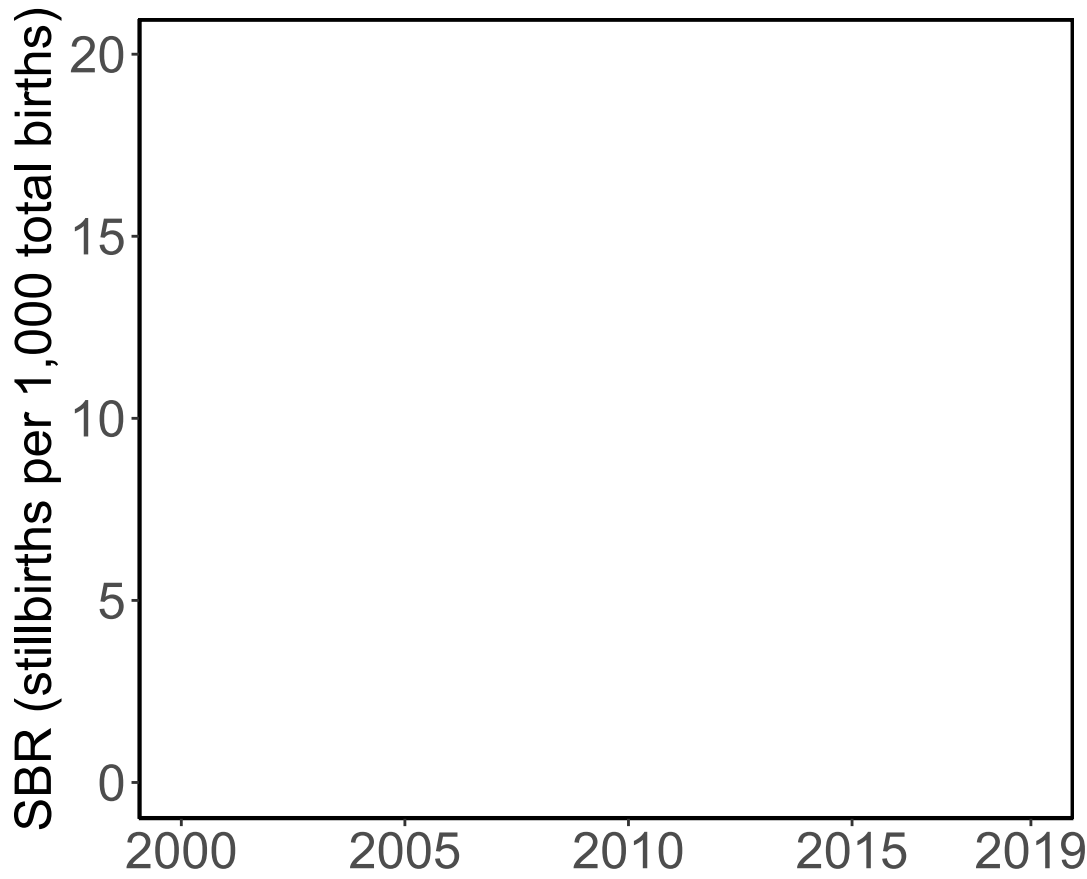

'28+ Weeks of Gestation' Data  
(Incl. Adjusted Data)

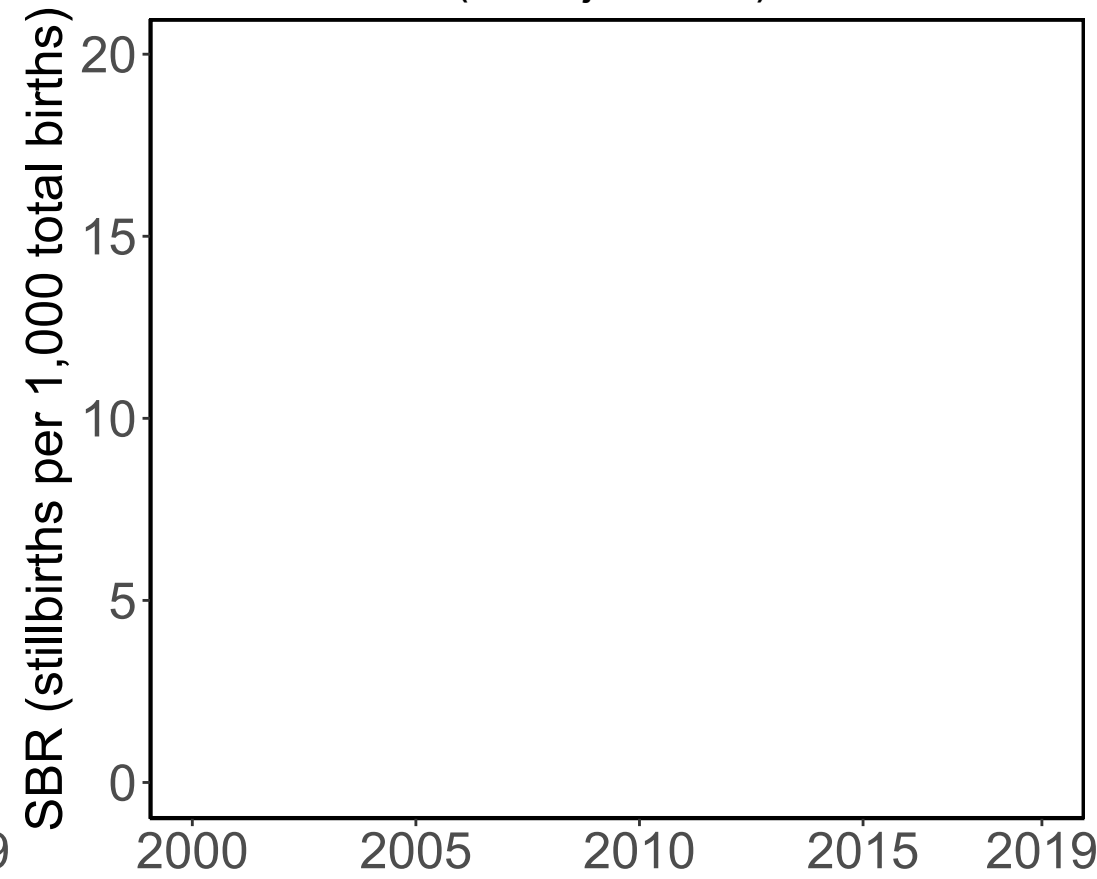

Data Included in the Model

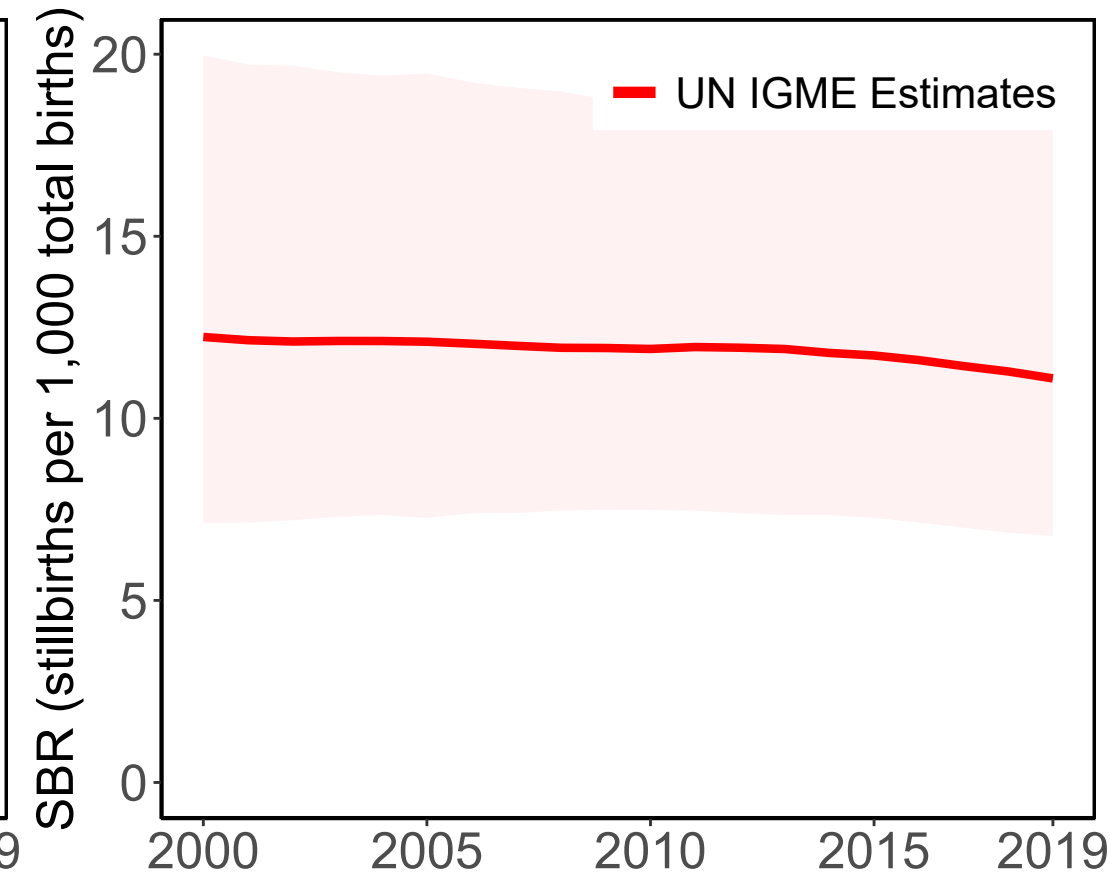

# Samoa

### Available Data

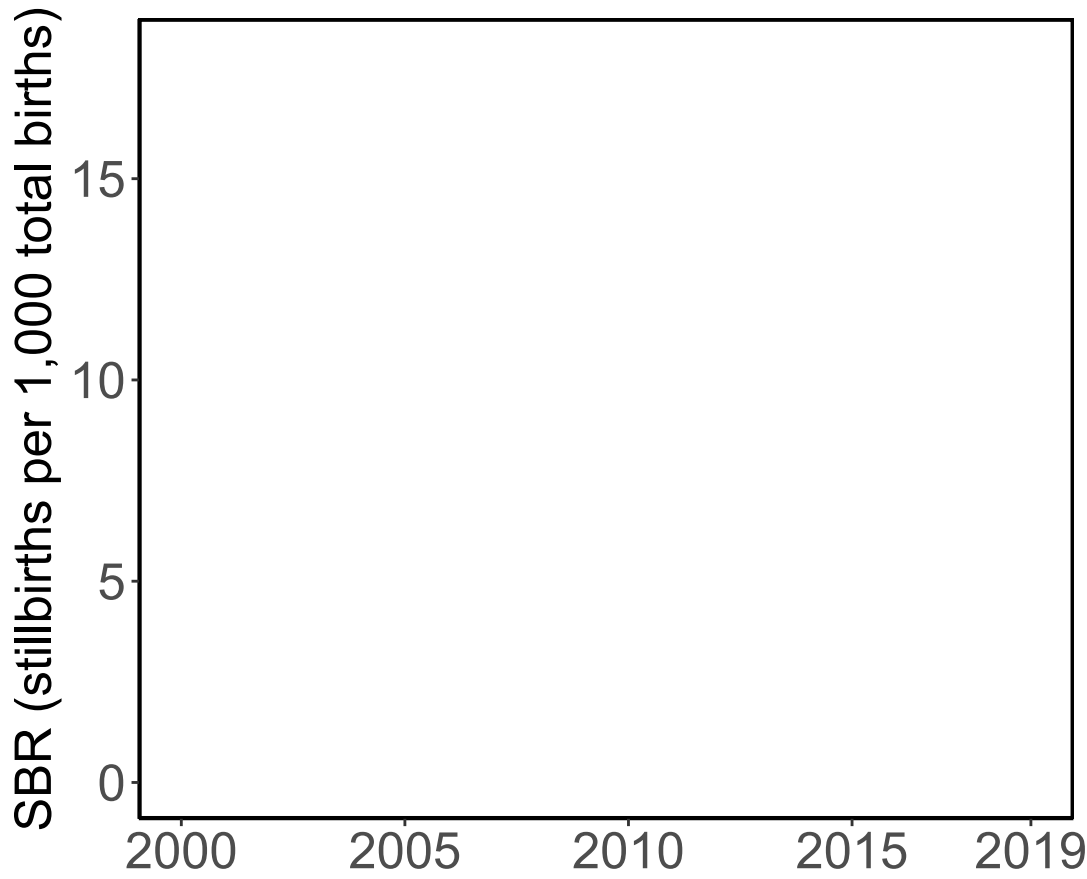

### '28+ Weeks of Gestation' Data (Incl. Adjusted Data)

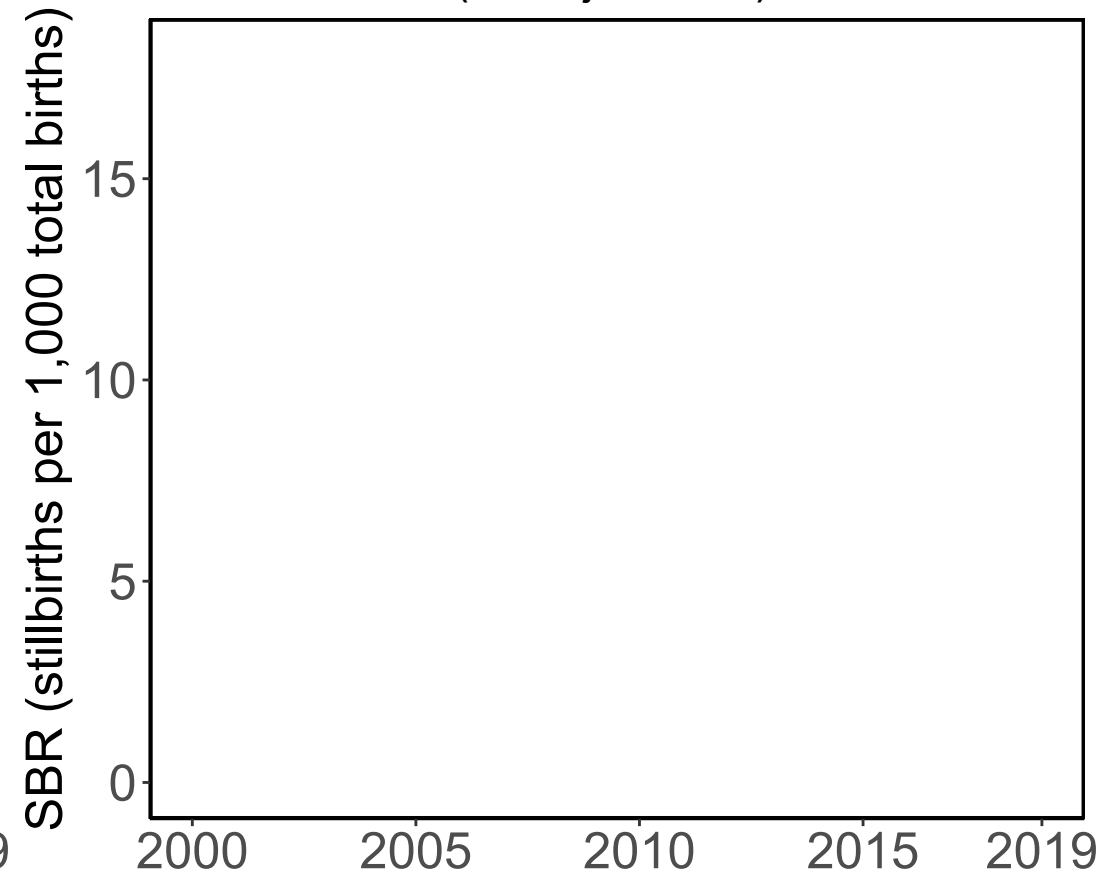

### Data Included in the Model

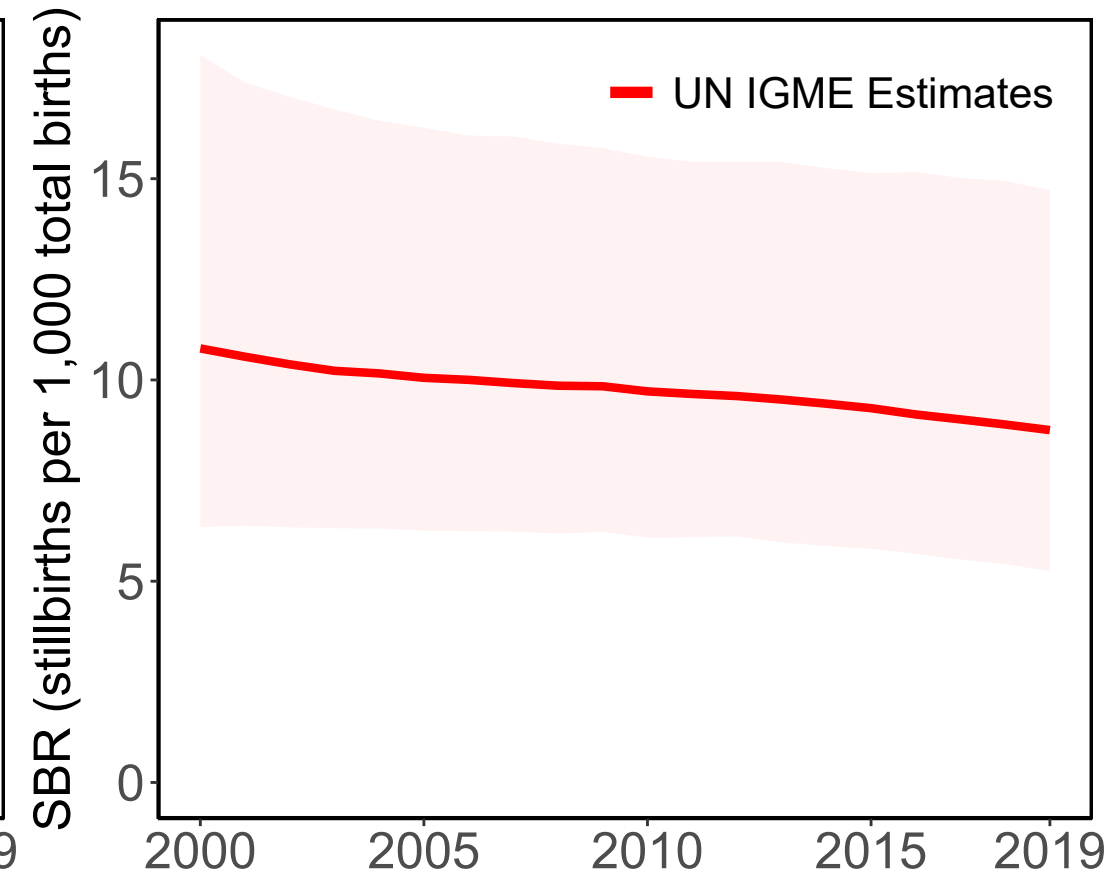

# Yemen

### Available Data

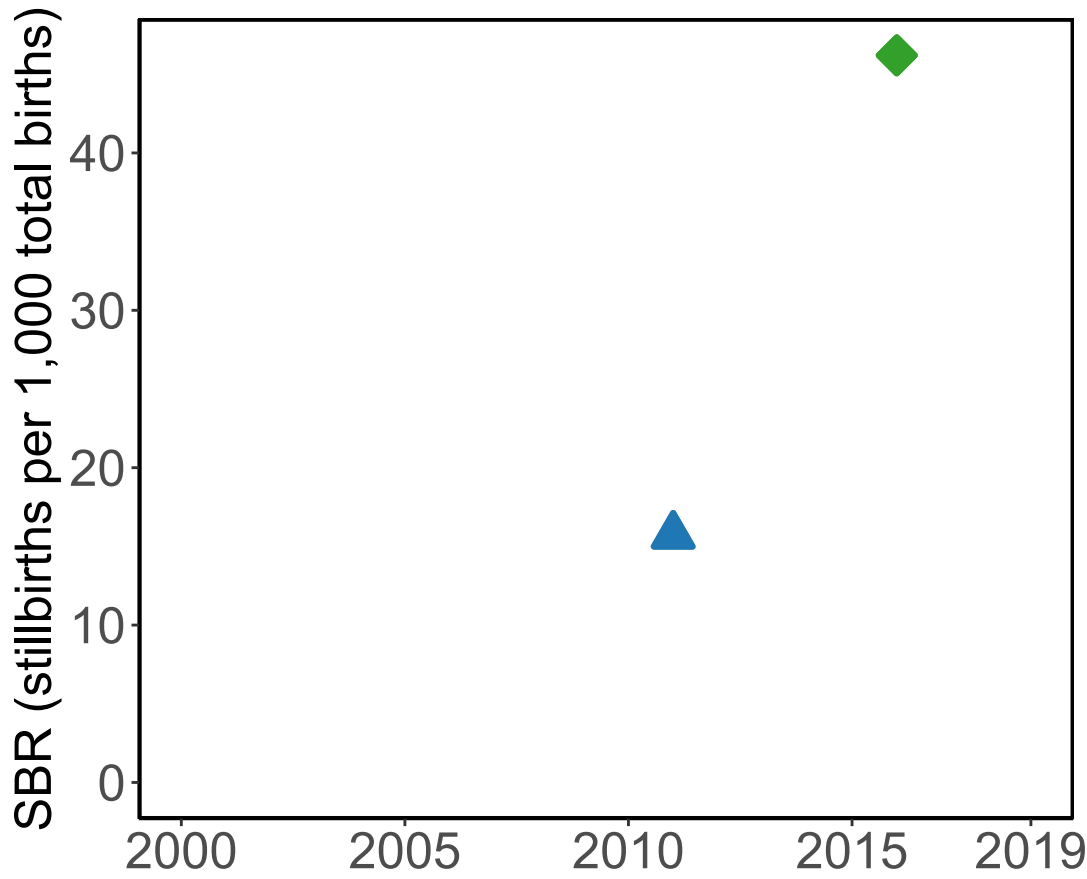

### '28+ Weeks of Gestation' Data (Incl. Adjusted Data)

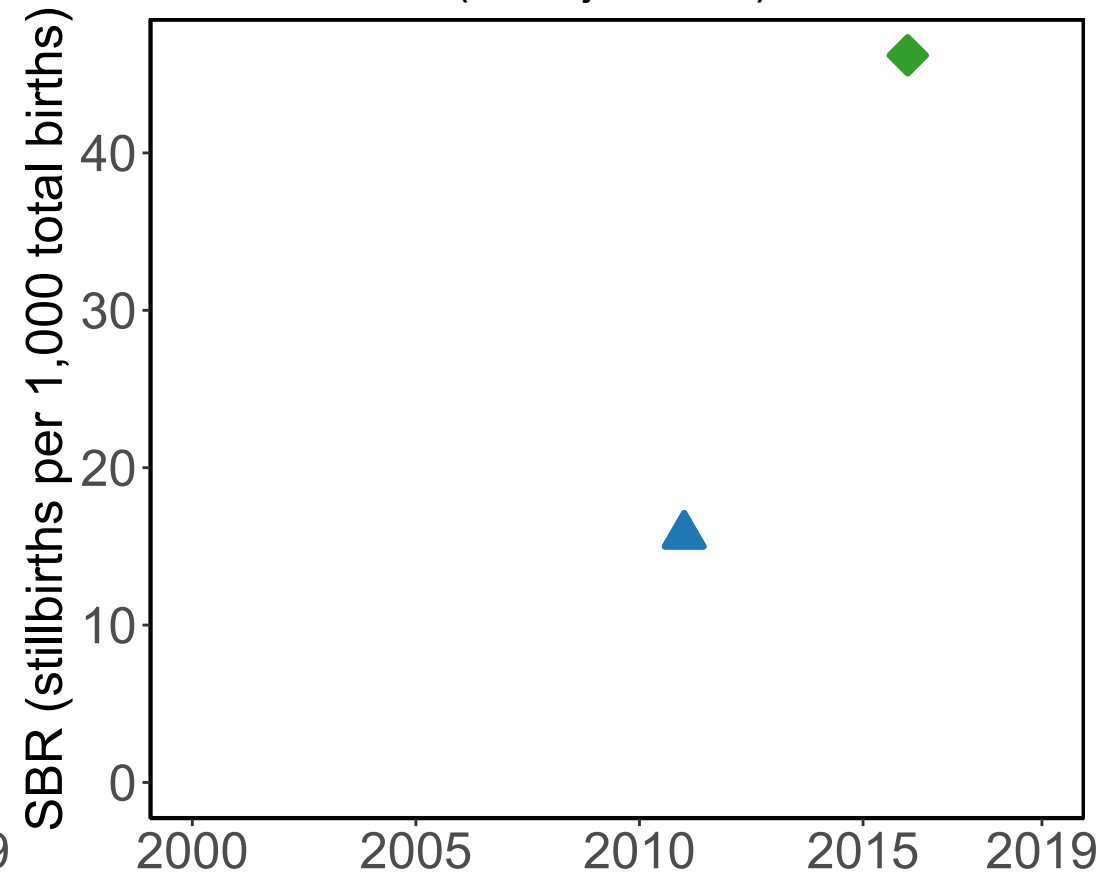

### Data Included in the Model

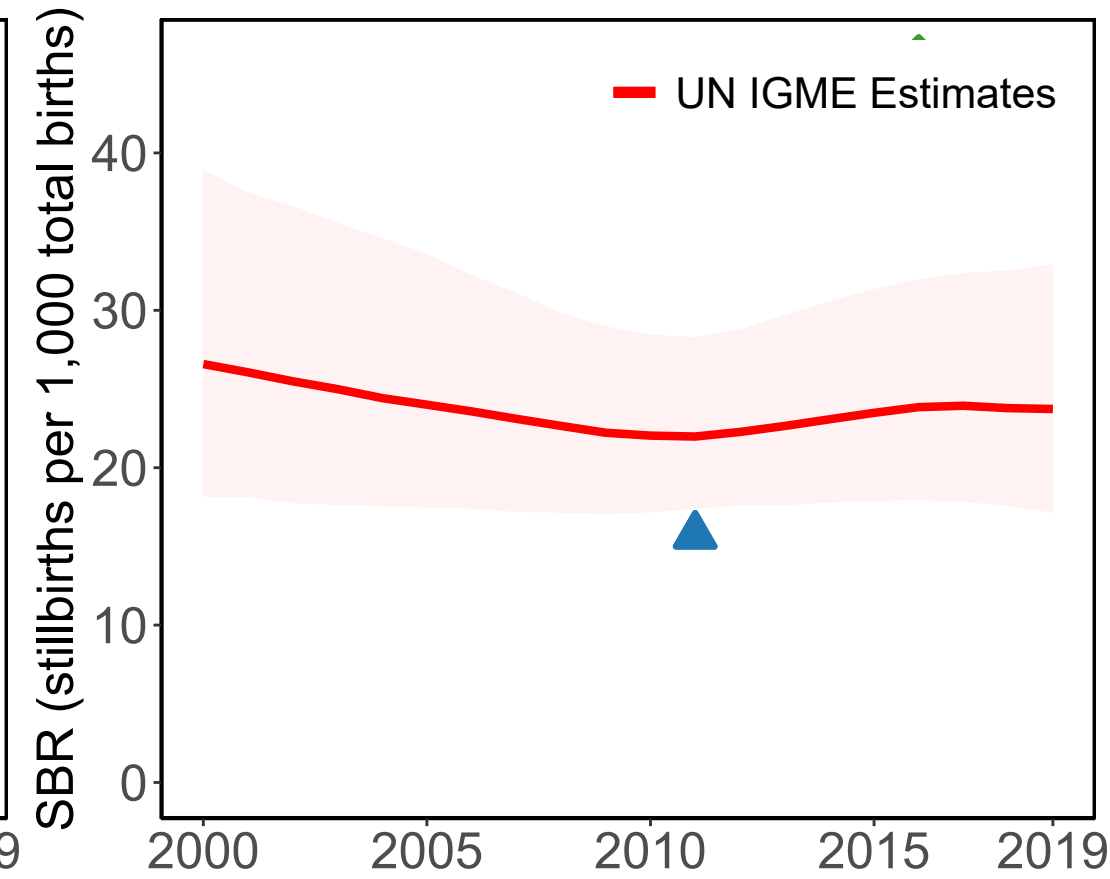

#### Source Types

△ Survey ◇ Population study

#### Data Sources

▲ National Health and Demographic Survey 2013 (DHS) (RC) (28wks) ◆ Al-Shahethi 2018 (28wks)

# South Africa

Available Data

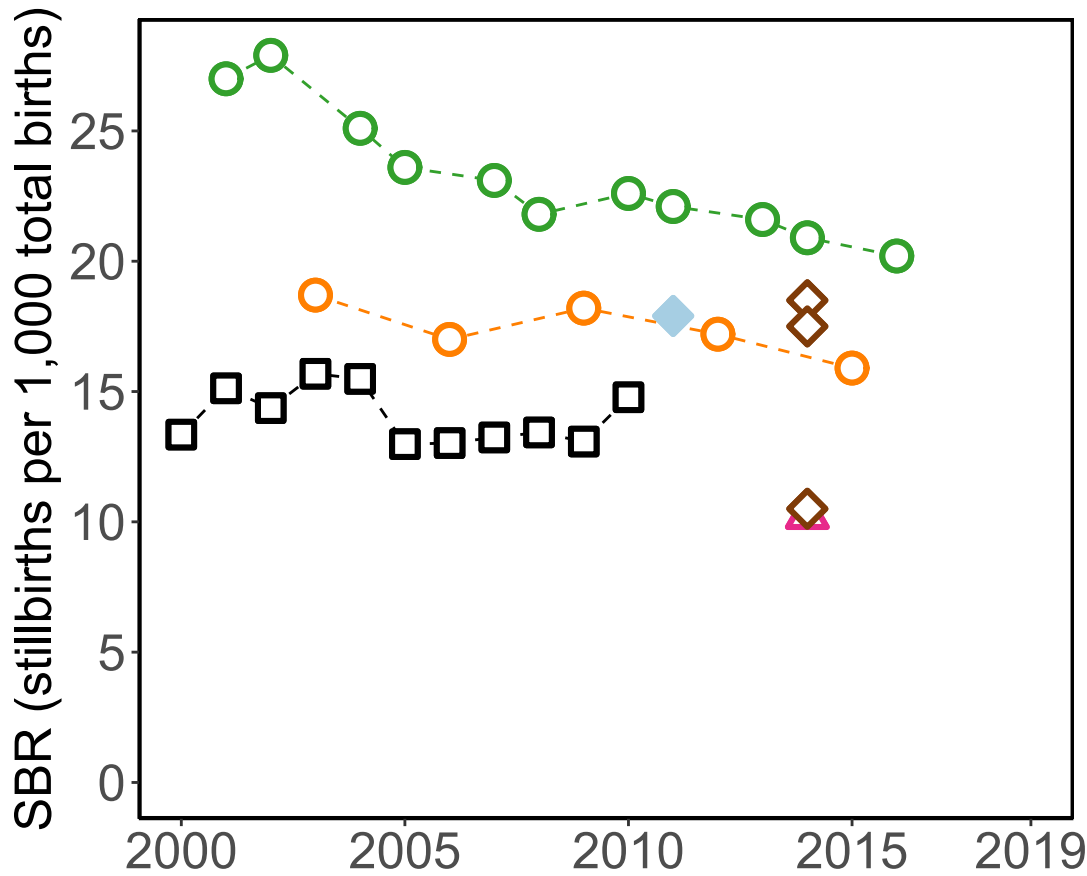

'28+ Weeks of Gestation' Data  
(Incl. Adjusted Data)

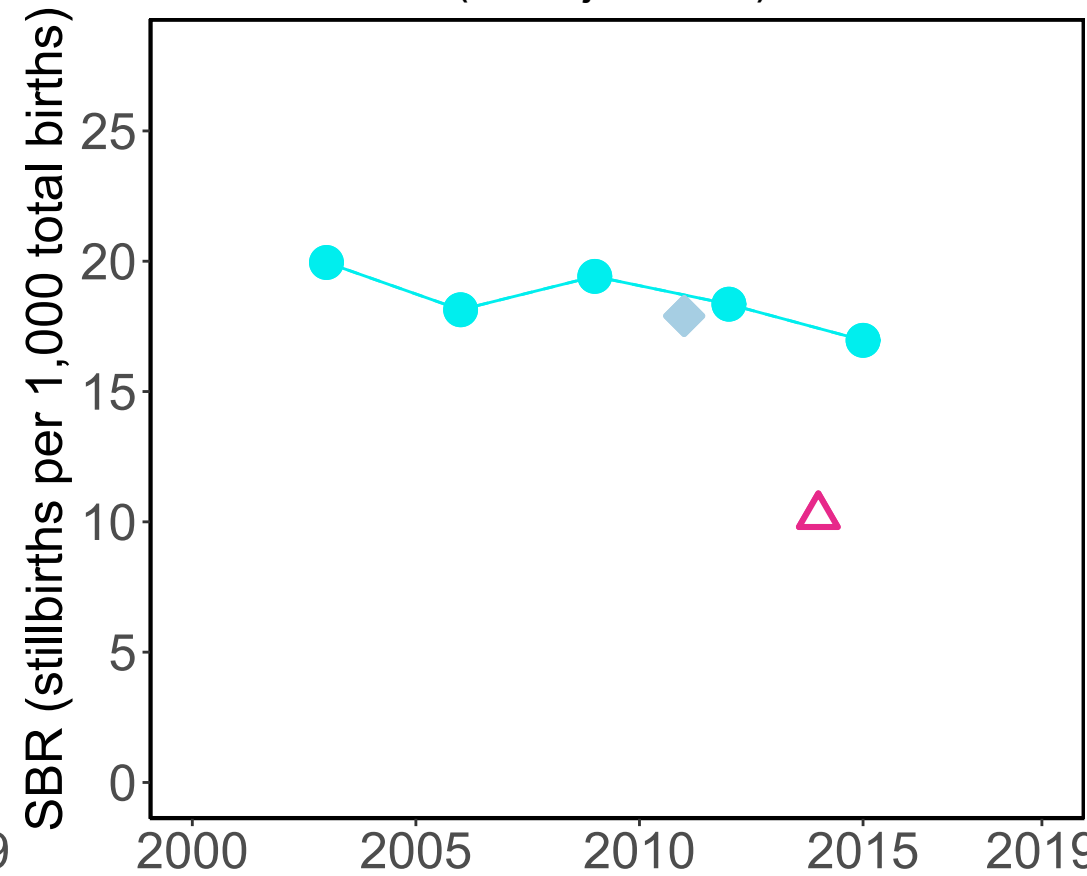

Data Included in the Model

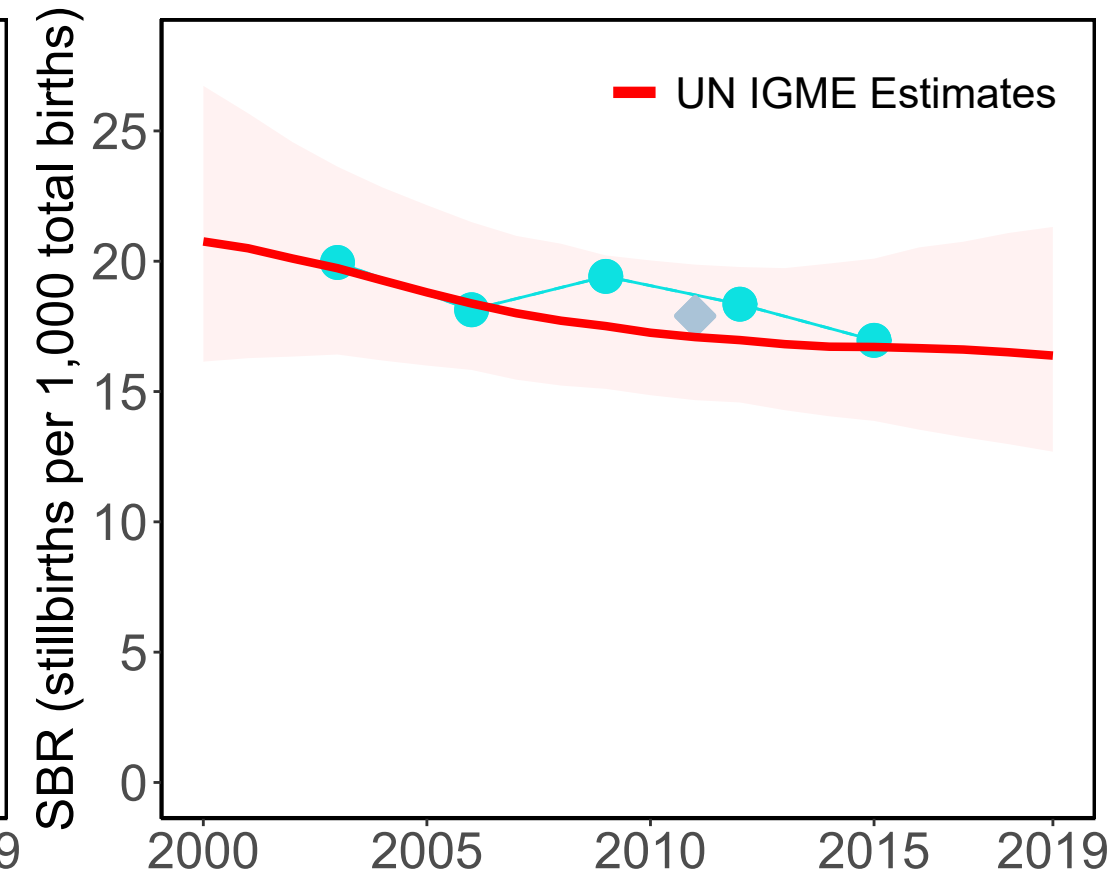

Source Types

- Administrative
- HMIS
- Survey
- Population study

Data Sources

- Vital Registration (26wks)
- HMIS-DHIS2 (1000g)
- HMIS-DHIS2 (any gestational age or birthweight)
- Demographic and Health Survey 2016 (DHS) (RC) (28wks)
- Lavin 2018 (1000g or 26wks)
- Waiswa (28wks)

# Zambia

Available Data

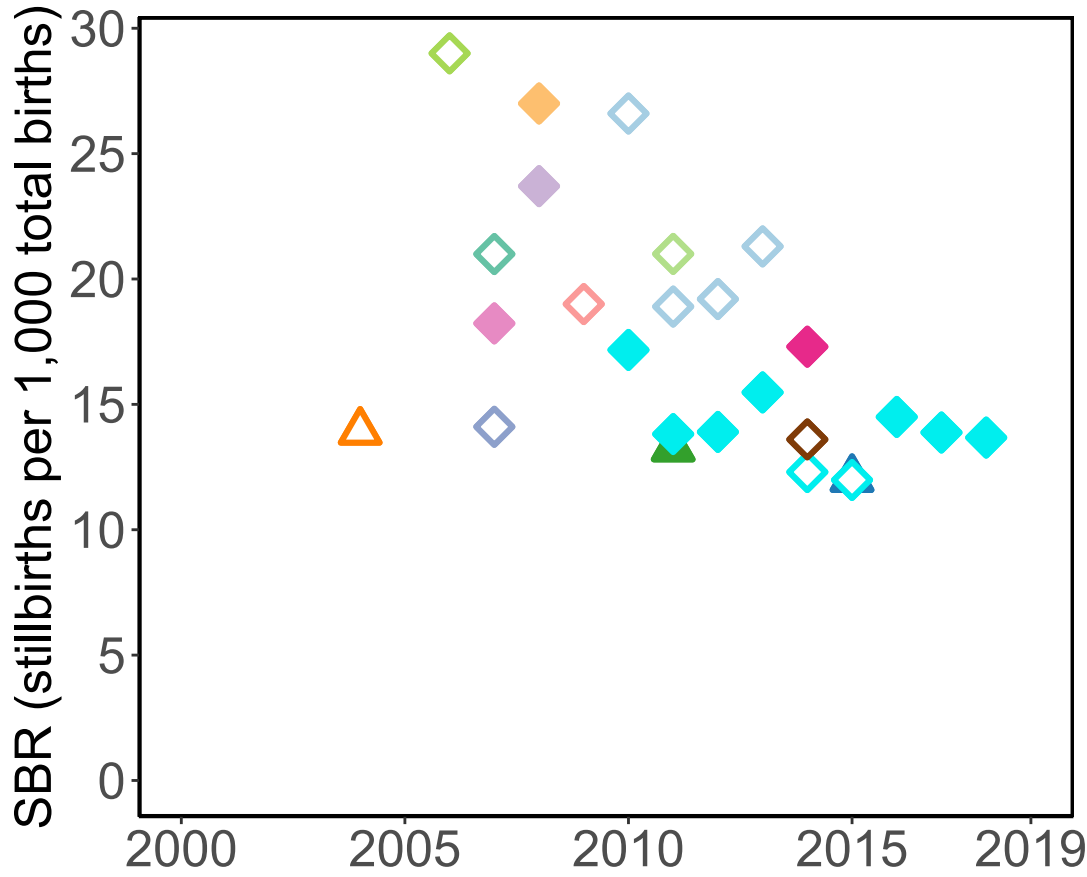

'28+ Weeks of Gestation' Data  
(Incl. Adjusted Data)

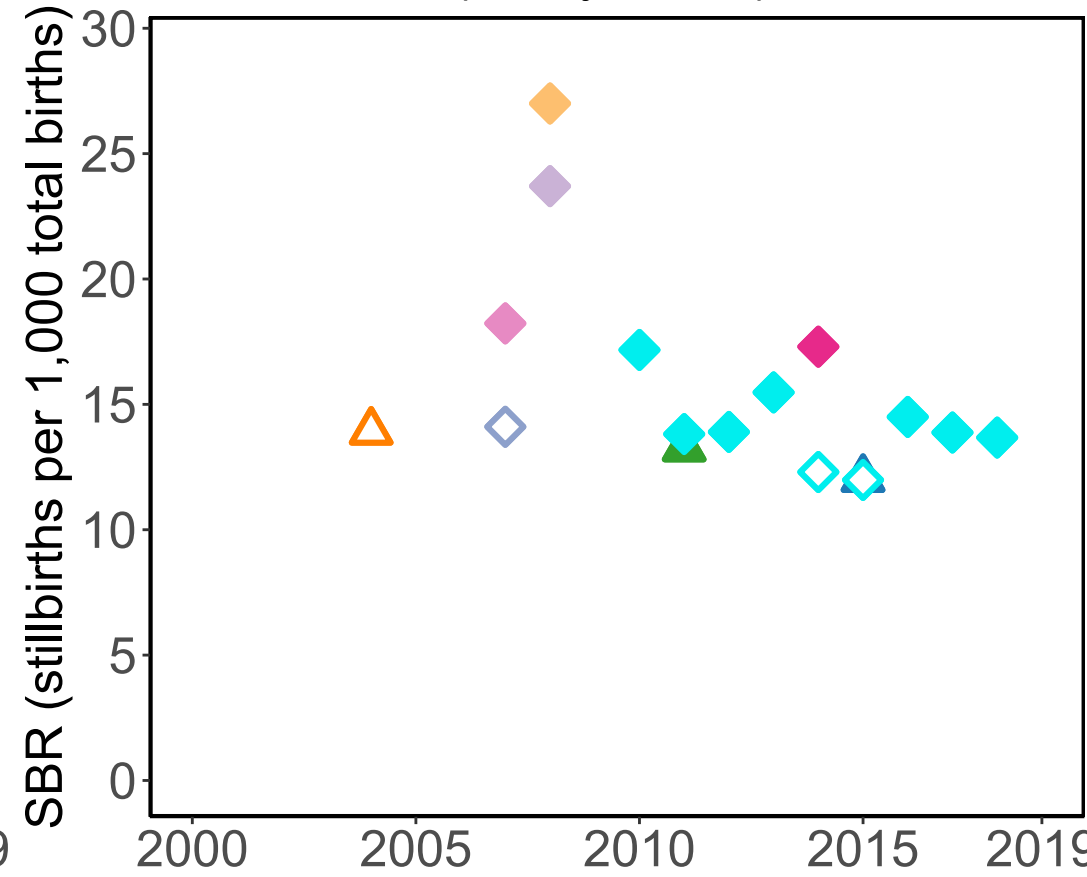

Data Included in the Model

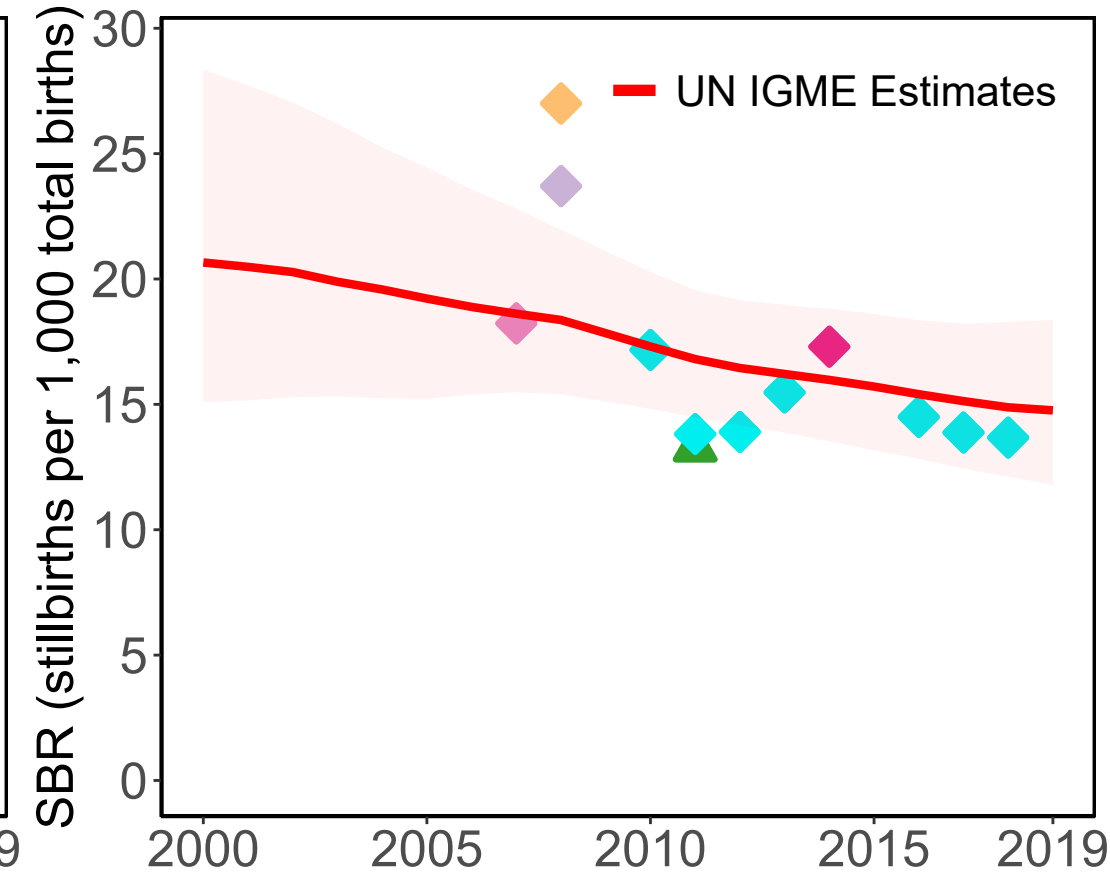

**Data Sources**

 Demographic and Health Survey 2018 (DHS) (RC) (28wks)

 Demographic and Health Survey 2013-14 (DHS) (RC) (28wks)

 Demographic and Health Survey 2007 (DHS) (RC) (28wks)

 AMANHI 2018 (28wks)

 McClure 2018 (500g or 20wks)

 Global Network Re-analysed (28wks)

 McClure 2015 (500g or 20wks)

 Saleem 2014 (1000g and 28wks)

 Stringer 2015 (not defined)

 Chi 2011 (28wks)

 Turnbull 2011 (28wks)

 Gill 2011 (28wks)

 McClure 2011 (28wks)

 Stringer 2011 (1000g and 28wks)

 McClure 2007 (1000g)

**Source Types**

 Survey  Population study

# Zimbabwe

Available Data

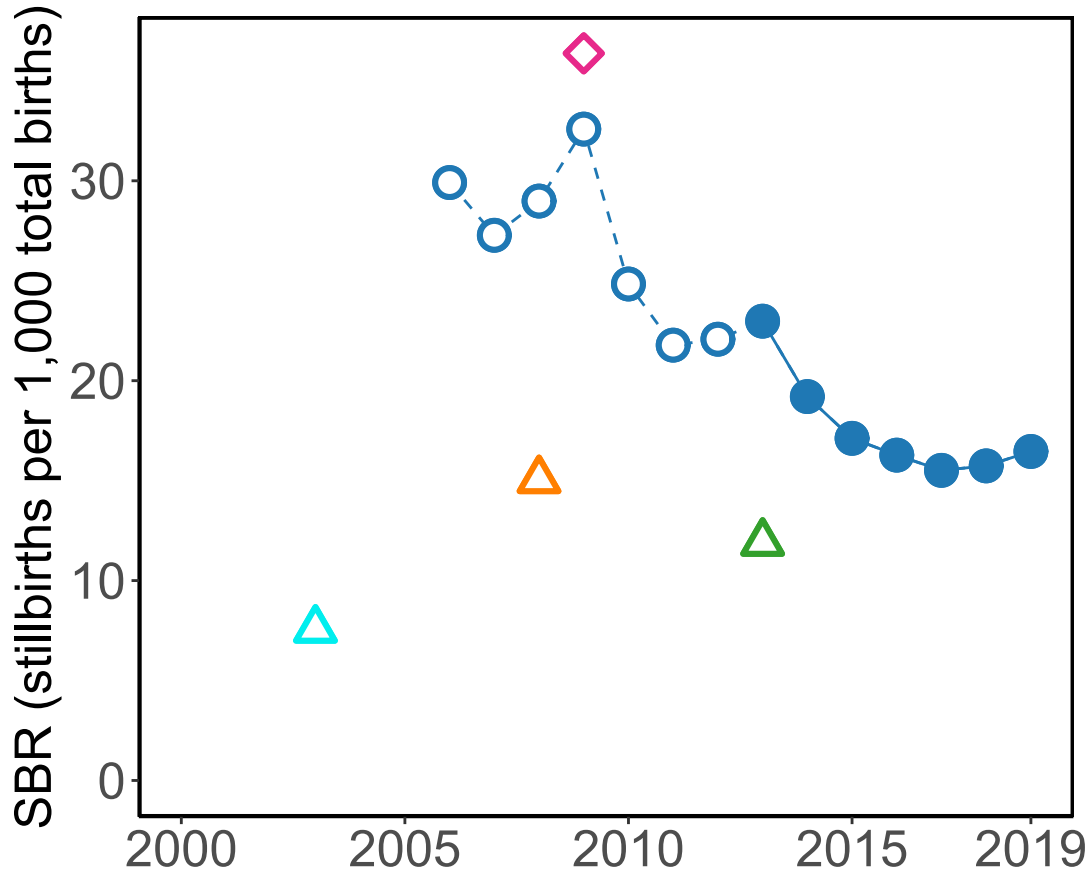

'28+ Weeks of Gestation' Data  
(Incl. Adjusted Data)

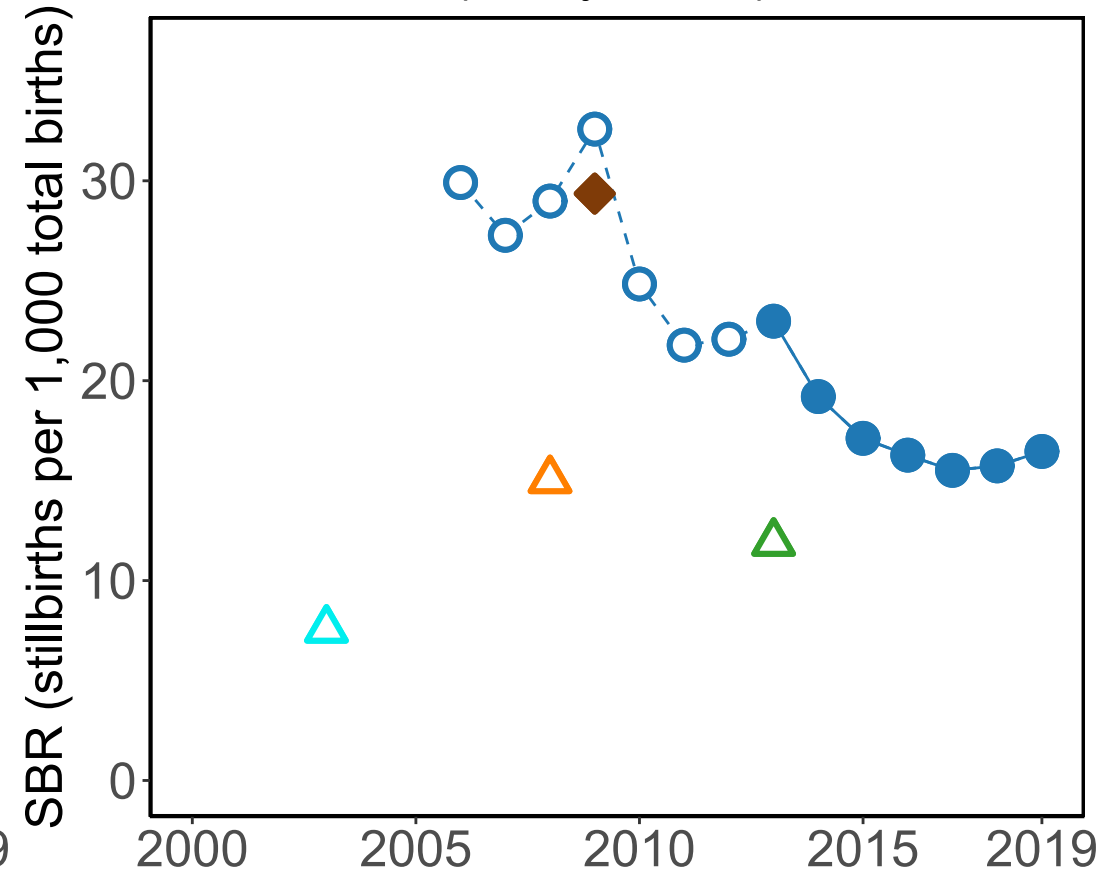

Data Included in the Model

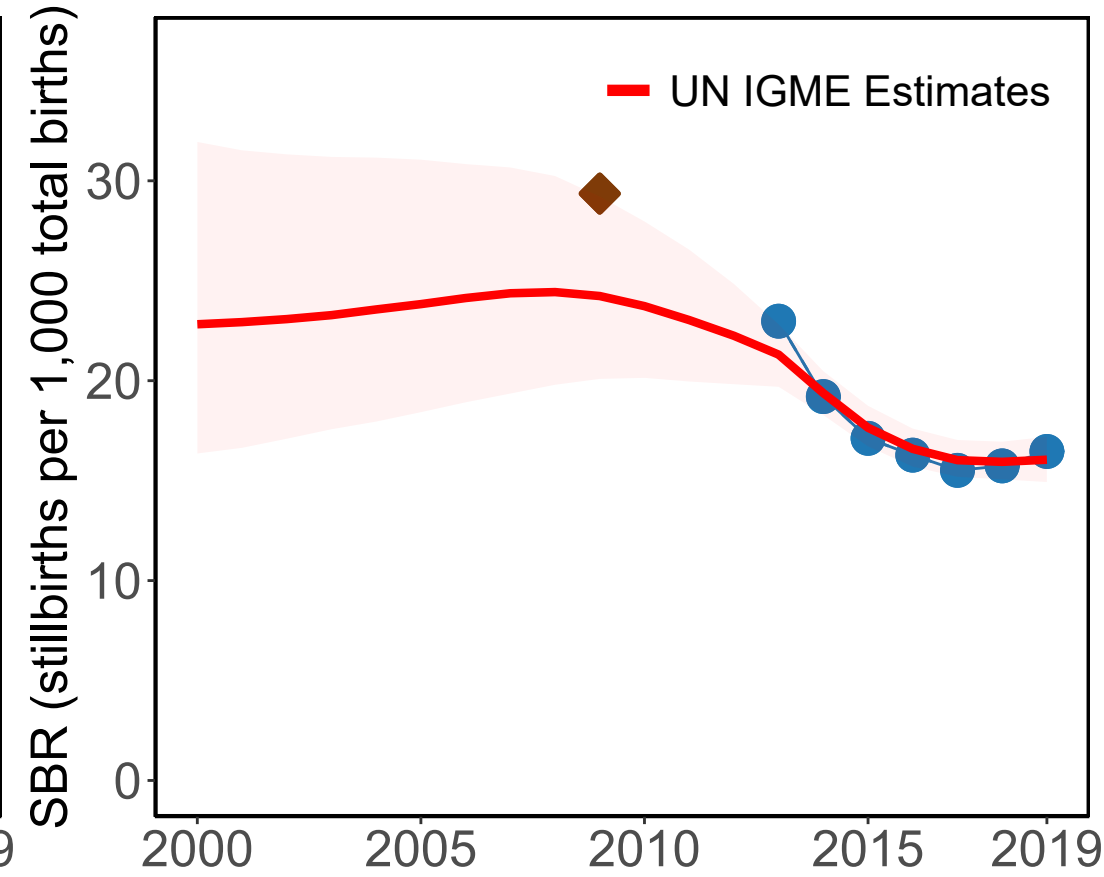

Source Types

- HMIS
- △ Survey
- ◇ Population study

Data Sources

- HMIS-DHIS2 (28wks)
- △ Demographic and Health Survey 2015 (DHS) (RC) (28wks)
- △ Demographic and Health Survey 2010-11 (DHS) (RC) (28wks)
- △ Demographic and Health Survey 2005-06 (DHS) (RC) (28wks)
- ◇ Tachiweyika 2011 (22wks)
- ◇ Tachiweyika 2011 (28wks adj from 22wks)
